# Supplementary material for: Differentiated glioma cell-derived fibromodulin activates integrin-dependent Notch signaling in endothelial cells to promote tumor angiogenesis and growth
Source: eLife journal article supplement (doi:10.7554/elife.78972), 2022-06-01
Supplement: fig1-data1 [file List of differentially expressed proteins between GSCs and DGCs-for volcano plots.xlsx]

## Sheet: LIST OF DIFF EXP PROTEINS
genes	pvalue	difference
MTPN	0.00236042	5.82187
MAP2	0.00139207	5.46495
HUWE1	0.0085369	4.56231
HMGCS1	0.00745453	4.17526
GOLGB1	0.0416083	4.01642
SLK	0.000425344	3.84654
JPT1	0.048227	3.61792
ACACA	0.00415499	3.60016
TF	0.012513	3.43993
PSME4	0.0239403	3.39845
CCDC88A	0.00772396	3.31493
GGPS1	0.036166	3.05206
FDFT1	0.0211237	3.02386
USP24	0.000473849	3.00383
SMC4	0.0500991	2.96016
EPN2	0.0180472	2.95072
HMGN5	0.0346434	2.87788
PM20D2	0.0137126	2.76465
STMN1	0.0148974	2.7393
PFDN6	0.0453075	2.61311
TBCD	0.0296838	2.60875
EIF2D	0.00749445	2.58252
SMYD5	0.0237854	2.57266
HPX	0.0472988	2.49692
ELP2	0.000891169	2.48931
TNPO1	0.000201563	2.46769
SSB	0.00987325	2.43856
C1QBP	0.00984804	2.42588
VIRMA	0.00377233	2.41118
RPL12	0.0376765	2.37851
HDGFL3	0.0116885	2.36162
USP9X	0.0154394	2.28886
UBE2R2	0.0157903	2.28858
PPP1R2	0.043425	2.28733
NAA15	0.0188612	2.27266
FDPS	0.00213732	2.18331
SNRPG	0.0245471	2.16677
GPHN	0.00417946	2.1518
GINS3	2.69594e-05	2.14286
IPO11	0.0142787	2.09676
NRDC	0.011508	2.08851
FIP1L1	0.045651	2.05743
IDI1	0.00727562	2.02295
HSP90AB1	0.0123126	2.0221
BIRC6	0.00940784	2.00481
NXN	0.00266195	1.90178
KDM1A	0.033358	1.90069
FASN	0.00476694	1.89173
XPO4	0.026711	1.86766
NASP	0.0088959	1.85498
RPL38	0.0329967	1.8531
CAND1	0.0309606	1.84302
HSPH1	0.00668544	1.81283
DCTN3	0.0323065	1.7874
RPL23	0.0347248	1.77198
IPO7	0.02561	1.76364
VAC14	0.040723	1.73733
PFAS	0.00159408	1.71727
ECPAS	0.0373663	1.71064
HMGB2	0.00238188	1.70647
PDAP1	0.00949445	1.69236
YBX1	0.0151747	1.6761
SETD7	0.0216257	1.67483
HSPA4	4.46581e-05	1.67474
PSAT1	0.00156845	1.65132
PSMB5	0.0129918	1.64967
XPOT	0.020762	1.63752
ANKFY1	0.0130248	1.62505
UBA2	0.046153	1.61905
PPP1R7	0.0139216	1.60677
PPM1E	0.0393786	1.59069
JPT2	0.0454067	1.57652
OSBP	0.0475335	1.57503
ALDH7A1	0.0381303	1.56623
ARL2BP	0.0358418	1.56234
SPAG7	0.0417994	1.5434
BCCIP	0.0469591	1.53729
IPO5	0.00410336	1.51652
WDR12	0.0399779	1.48385
ST13	0.0066716	1.47299
PSMA3	0.0131565	1.46049
CSE1L	0.00510705	1.45656
PFDN2	0.0095929	1.44379
RANBP1	0.0301051	1.43681
RPIA	0.0489058	1.39541
AARS	0.018426	1.38004
COPS2	0.0375111	1.34372
ACP1	0.0486385	1.3296
PSMA2	0.0332575	1.32728
MYH10	0.0231063	1.31809
DBI	0.0360703	1.31239
ACLY	0.00919496	1.28975
USP5	0.017557	1.27694
ACTR1B	0.00372366	1.27215
WDR77	0.012416	1.26651
GINS4	0.0320597	1.24595
YWHAB	0.038691	1.23775
KNTC1	0.0118648	1.22417
GEMIN5	0.0013148	1.22411
PRKCSH	0.0221636	1.21875
HDGF	0.0386643	1.21839
PSMA5	0.0242265	1.21362
PSMD5	0.0272596	1.18272
PSMB3	0.0340675	1.18106
APEH	0.00148655	1.16274
MVD	0.00126873	1.16065
PSMA1	0.00409157	1.12906
IGF2R	0.0255452	1.12009
TARS	0.0465919	1.10739
IPO9	0.0311709	1.08641
XPO7	0.0497073	1.08256
PSMD1	0.0347352	1.05008
KYAT3	0.049447	1.04967
PSMB7	0.0103233	1.04803
PSMA4	0.00219599	1.04453
DNPH1	0.0467638	1.04361
DIS3L2	0.0246093	1.04025
SRGAP2	0.0324078	1.00612
AHSA1	0.037819	1.00159
RARS	0.041186	-1.00332
MYL6	0.014288	-1.01239
S100A13	0.0344524	-1.10329
JAM3	0.0184948	-1.11106
DDB2	0.0317336	-1.13422
FIBIN	0.0288197	-1.16633
SEC14L2	0.0225814	-1.20609
WARS	0.0349567	-1.20626
ERAP1	0.0388741	-1.21411
PCK2	0.0262652	-1.22139
LMNA	0.0268596	-1.23074
FMR1	0.0267664	-1.24797
TP53I3	0.0420155	-1.2742
S100A11	0.0173912	-1.27533
GLG1	0.0353134	-1.27953
PTGR1	0.00388231	-1.28717
NELFB	0.00144867	-1.31494
GGH	0.0311243	-1.32219
RRAGA	0.00655722	-1.42231
CACHD1	0.0384025	-1.43073
MYO1C	0.0156585	-1.47454
AP2S1	0.00511482	-1.48054
MATN2	0.0486194	-1.4926
FUT11	0.025432	-1.56146
CADM4	0.0417705	-1.56434
MANEA	0.0172799	-1.62626
COL11A1	0.046971	-1.69723
BCAM	0.0145569	-1.7086
COLGALT1	0.0479314	-1.76529
ITGA5	0.0412572	-1.76609
CCDC80	0.0174671	-1.77343
PCDH1	0.0117858	-1.78301
PDLIM7	0.0455323	-1.80991
NOV	0.000214052	-1.85465
C1GALT1C1	0.00307588	-1.8709
LAMA5	0.0122262	-1.9305
SUMF1	0.025878	-1.95468
ACOT13	0.0403432	-1.95891
GALNT2	0.0142043	-1.99279
UBE2L6	0.00281074	-2.03239
OSMR	0.0122107	-2.03513
STAT1	0.00150377	-2.05066
IL6ST	0.0125395	-2.05514
CHST3	0.015564	-2.08289
ENTPD6	0.0331971	-2.08375
SEMA3E	0.0338501	-2.09391
COL7A1	0.0201493	-2.10879
IFI35	0.0105655	-2.11323
HLA-A	0.00782726	-2.11493
GALNT6	0.0478641	-2.12007
LOXL3	0.0143519	-2.17002
NCS1	0.0433142	-2.17231
PLOD1	0.00264144	-2.19026
ATP1B3	0.0355525	-2.21764
B3GAT3	0.0390517	-2.23719
NISCH	0.0143054	-2.25121
HLA-B	0.0467671	-2.29952
ADAM17	0.000247531	-2.3221
CTSO	0.0260447	-2.34503
CRTAP	0.0372383	-2.36713
LTBP2	0.0171929	-2.36735
NAGLU	0.0054747	-2.41011
TNC	0.000334719	-2.43714
AXL	0.00298621	-2.43929
VGF	0.041223	-2.44229
TGFBR3	0.0426089	-2.47336
EXT1	0.030274	-2.49372
S100A16	0.0129247	-2.49858
DNAJB11	0.00163452	-2.49868
ATP2B4	0.0246803	-2.55557
CHPF	0.00545092	-2.56919
FUCA1	0.0486116	-2.59686
SEZ6L2	0.0153285	-2.64925
MMP11	0.011259	-2.6845
EXTL2	0.0405471	-2.70555
ECE1	0.00215929	-2.72825
ITGB1	0.0236483	-2.74157
EFNB3	0.0296401	-2.7441
APMAP	0.0458332	-2.75736
CTSL	0.0157344	-2.76252
NID1	0.0068091	-2.76851
C2	0.0190436	-2.77688
SPP1	0.0312622	-2.81903
CDON	0.048405	-2.82126
DNASE2	0.00975147	-2.85467
MAN2B1	0.0314688	-2.88596
SDF4	0.023101	-2.90881
GBA	0.0498184	-2.91837
CTSC	0.0128843	-2.94659
LTF	0.0226292	-2.96674
ENDOD1	0.00274954	-2.96769
PCSK6	0.0469289	-2.98969
ACADVL	0.000206505	-3.02248
IGFBP2	0.00465822	-3.02952
CTSS	0.0100904	-3.10867
NUCB1	0.00346234	-3.11244
NPTXR	0.0155032	-3.1522
B4GALT1	0.0439531	-3.17196
CSF1	0.00727194	-3.18878
LGMN	0.0352826	-3.20044
GBP1	0.0180281	-3.22291
GPC1	0.00978521	-3.22424
MYOF	0.0239745	-3.22756
GLCE	0.0352923	-3.25667
EXT2	0.0277198	-3.26398
MVP	0.0494072	-3.30045
SMPD1	0.00900534	-3.34496
CD109	0.00563093	-3.35279
FBN1	0.01706	-3.39735
EDIL3	0.0032725	-3.40126
GALNT7	0.0405397	-3.40143
FUCA2	0.0283054	-3.41175
SEMA4B	0.0077101	-3.41549
NOMO1	0.0265051	-3.42135
AKR1C3	0.0451004	-3.42271
FBLN1	5.35032e-05	-3.47815
CD47	0.00582814	-3.48711
ANTXR1	0.00334164	-3.50474
CD44	0.0105633	-3.57156
APLP1	0.000191929	-3.59608
FAM20C	0.0386136	-3.6514
FBLN5	0.000115486	-3.65941
LIF	0.00215353	-3.66503
SIL1	0.0353037	-3.67825
ANGPTL4	0.024935	-3.7115
IGFBP7	0.0442507	-3.73439
PRSS23	0.0151133	-3.76198
PDGFRL	0.00295175	-3.76579
SERPINE1	0.0381294	-3.81875
P4HA2	0.0302643	-3.83201
ANXA6	0.0276503	-3.84787
TPP1	0.0312155	-3.86348
FSD1	0.0012324	-3.90984
ITM2B	0.0205693	-3.91769
CLU	0.042461	-3.92614
TCN2	0.0446365	-3.95916
PAM	0.0223218	-3.96071
MAN2B2	0.00315675	-3.98095
CA13	0.000412382	-4.02731
DDR1	0.00507809	-4.04975
SPOCK1	0.0360305	-4.05094
GALNS	0.00323698	-4.0603
C1QL1	0.00562393	-4.07818
SEMA3C	0.0222818	-4.08972
CAPG	0.00920407	-4.10092
MAN1A2	0.0264186	-4.17735
HSPA13	0.0304032	-4.2263
PSAP	0.0469721	-4.23594
ANXA1	0.0270863	-4.25815
SCUBE3	0.00222305	-4.29225
LAMB2	0.00474515	-4.31322
HTRA1	0.0446149	-4.36794
C1QTNF1	0.00238007	-4.38447
COL5A2	0.0253484	-4.39621
SEMA3B	0.000866323	-4.40113
C1QTNF5	0.000565692	-4.40852
VWA1	0.0155887	-4.40928
COL6A2	0.0132978	-4.46436
GALNT16	0.00351593	-4.50125
PPP1R10	0.0336186	-4.53938
ANGPTL2	0.000570571	-4.55705
COL18A1	0.0113637	-4.5631
na	0.0314673	-4.57988
FMOD	0.0032774	-4.58862
ADAM10	0.000262482	-4.68294
C1QTNF6	0.00225652	-4.71346
IGFBP6	0.00418688	-4.72239
CTSB	0.00170377	-4.72386
OLFML2A	0.0162271	-4.7391
KDELC1	0.0400037	-4.74032
IGFBP5	0.00764258	-4.83369
C4B	0.0500726	-4.88582
NT5E	0.00199324	-4.9163
LRRC15	0.0291696	-4.96784
C1S	0.0155457	-5.13639
ITGA3	0.000478112	-5.30068
CPA4	0.04605	-5.526
DKK3	0.000412848	-5.98385
SRPX2	0.000117769	-6.07813
PLAU	0.0180036	-6.25885
BMP1	0.0119105	-6.44083
CFI	0.00565405	-7.09611
C1R	0.00375993	-7.13353
CP	0.00291219	-7.3812
THBS3	0.00110775	-7.50272
RPLP1	0.073619	3.95278
POLR1A	0.0710052	3.71397
CRYBG3	0.0507516	3.42505
BCAN	0.114947	3.18003
TCERG1	0.264823	3.08901
CSTB	0.324359	2.93424
DBN1	0.0548125	2.91765
TUBB2B	0.11522	2.88526
SMAP	0.102003	2.81646
PTMA	0.0642362	2.79412
CHD4	0.100136	2.76326
HSPE1	0.339835	2.73443
RPS20	0.127316	2.66621
CMTM5	0.0807532	2.66134
CLTA	0.176871	2.64783
SUPT6H	0.0814142	2.64622
TOP1	0.118501	2.63808
SMARCC1	0.0777857	2.62
TXNDC17	0.228731	2.60777
MATR3	0.165714	2.57985
HDDC2	0.135469	2.55136
UBR4	0.075645	2.51072
ALDH2	0.140312	2.45123
RPS10	0.0955807	2.44385
CLUH	0.314605	2.42447
SPTBN2	0.116239	2.42006
TTLL12	0.243431	2.40361
FABP7	0.0815643	2.3811
XPO5	0.214682	2.3193
PTBP2	0.134192	2.26358
CTH	0.201084	2.25955
UBE2O	0.0892648	2.21121
GYS1	0.143149	2.20738
ERH	0.294812	2.20592
PSMB6	0.101664	2.17804
CWC27	0.081298	2.17686
WTAP	0.139683	2.17031
FCHO2	0.16378	2.15667
RPL17	0.0653687	2.14964
HIST1H3A	0.349679	2.14961
PURB	0.152661	2.13913
SYNE2	0.366142	2.13879
RAC1	0.286558	2.11462
MYH14	0.223442	2.11156
RPE	0.19952	2.0782
NUMA1	0.052389	2.06833
PSMD4	0.146562	2.06278
UBE2I	0.41128	2.05189
FKBP1A	0.308429	2.04923
HPF1	0.0682182	2.03826
MON2	0.0628015	2.01188
VTI1B	0.0525594	2.00796
UBE2E3	0.0553886	2.00548
HSP90AB4P	0.247295	1.99688
LZTFL1	0.268342	1.9886
DNMT1	0.200185	1.98627
EIF3D	0.141036	1.98241
TP53BP1	0.202142	1.97183
UBE2V1	0.327885	1.95715
RPS23	0.157507	1.94502
C12orf10	0.08036	1.9338
SNRPD2	0.296978	1.92241
LRPPRC	0.230313	1.91186
MAPT	0.172143	1.90791
PWP1	0.0853631	1.89841
LYPLA1	0.247322	1.88787
CBX1	0.242844	1.86391
MYO18A	0.286431	1.86387
ANP32B	0.255912	1.85096
DOCK10	0.194708	1.85055
RPS28	0.271478	1.84899
SZRD1	0.119681	1.84017
TUBA1A	0.0630943	1.83621
DTD2	0.118443	1.83568
PFDN1	0.146733	1.82155
NID2	0.476157	1.80943
NUDT16	0.116967	1.8084
STAG2	0.161129	1.80754
NUDT3	0.127998	1.80235
TIMM50	0.100457	1.79858
ZZEF1	0.0763625	1.76775
TLN2	0.143592	1.76268
RPL27	0.186251	1.76093
IPO4	0.139475	1.74406
OGA	0.119813	1.74378
HSPA4L	0.126277	1.73982
HSP90AB2P	0.465628	1.73123
PSMB4	0.197132	1.71811
EEF1B2	0.0910794	1.71586
UGDH	0.193256	1.71017
OGFOD1	0.0618671	1.7059
MAGED2	0.142045	1.6978
PHGDH	0.287993	1.69175
UBXN7	0.100624	1.68891
TRIM28	0.0532979	1.67462
GCN1	0.154429	1.67376
PRRC2A	0.14221	1.6726
USO1	0.070775	1.67144
PUS7	0.123522	1.65999
TPR	0.136806	1.65927
CKAP5	0.205324	1.646
PPIF	0.254669	1.64264
RPUSD2	0.298573	1.63382
OAT	0.321359	1.63248
RPL30	0.359015	1.61761
NAXE	0.25704	1.60732
TUBB	0.14808	1.59919
ELOB	0.464257	1.59808
PTGES3	0.198218	1.59494
CAD	0.0664844	1.59401
DIAPH1	0.0588708	1.5901
SNRNP200	0.131437	1.58154
PITRM1	0.439877	1.57609
SCO1	0.171417	1.57166
EIF5	0.0829545	1.57078
ALDH1B1	0.18376	1.56696
SCAF11	0.0957745	1.56434
CFDP1	0.148194	1.5603
FTL	0.169858	1.55954
NUCKS1	0.133604	1.55889
RPS13	0.238392	1.55194
DHX36	0.355893	1.54006
ALDH9A1	0.0624626	1.53811
CLIP1	0.105568	1.53447
SOD1	0.299297	1.52939
CHMP4A	0.124585	1.52759
LYPLA2	0.0631015	1.52329
UBXN1	0.222051	1.51648
EXOSC7	0.225327	1.51595
MDC1	0.334396	1.50857
WDR48	0.272856	1.5073
MAD2L1	0.181994	1.4965
PTMS	0.395319	1.49563
HMGB3	0.263067	1.49145
EIF4B	0.103334	1.48354
AGAP3	0.0820333	1.48334
ARL3	0.054434	1.48253
MCM4	0.320432	1.48088
HTT	0.230157	1.47316
NUDT1	0.120745	1.46657
ACAT2	0.0816	1.46214
EIF3B	0.0563612	1.45787
LRP8	0.263533	1.44467
MLH1	0.356739	1.43582
AGO3	0.156257	1.43435
PCYT2	0.155123	1.42747
RPS19	0.421282	1.42121
SNRPE	0.420718	1.42093
NME2	0.361266	1.42044
ABCF1	0.365361	1.4145
CYP20A1	0.158742	1.41326
RPS16	0.174202	1.40538
SRM	0.0779417	1.40357
HNRNPH1	0.059928	1.40106
SORL1	0.591558	1.39199
DCTN1	0.086818	1.38685
TTN	0.515198	1.37239
NADSYN1	0.246589	1.36801
ANKRD44	0.305015	1.36487
CNOT3	0.273073	1.35828
NUDCD3	0.120466	1.35282
SH3KBP1	0.107317	1.34973
CCAR2	0.522437	1.34449
GLUL	0.120133	1.34356
PAAF1	0.186909	1.34238
SUMO1	0.526563	1.34134
SRI	0.414517	1.33584
AAMDC	0.484345	1.3316
NOVA2	0.295664	1.32916
NUDCD2	0.0763889	1.32587
HSP90AA1	0.0714924	1.31015
POLE3	0.223402	1.31004
HIP1	0.13306	1.30713
ABRAXAS2	0.121736	1.29741
RALY	0.155	1.29407
GATD3A	0.233727	1.29202
XYLT1	0.380544	1.28727
DPP9	0.20565	1.27413
EEF1D	0.172244	1.27088
XRN2	0.110664	1.26644
GAS2	0.520184	1.26332
VPS13C	0.09579	1.26199
MCM2	0.180036	1.25571
SUPT16H	0.0969683	1.25326
TMPO	0.470716	1.25139
KIF5B	0.0651763	1.2502
IGF2BP2	0.156738	1.24536
WDHD1	0.363569	1.23856
TXN	0.498121	1.2372
NPEPPS	0.0881455	1.2323
RPS11	0.262502	1.23193
PSIP1	0.149315	1.23116
NAA25	0.102497	1.22787
YTHDF2	0.366159	1.22471
RPL10A	0.061695	1.22301
CFL1	0.254268	1.2218
STX6	0.203565	1.21877
BOLA2	0.217451	1.21816
EPB41L2	0.10982	1.21272
RABGAP1	0.0711771	1.21249
YTHDF3	0.280397	1.21141
TPP2	0.123936	1.20722
ARHGDIA	0.179442	1.20659
NES	0.64492	1.20628
HNRNPC	0.237324	1.19819
CLIP2	0.529734	1.19674
CHM	0.100051	1.19398
VCP	0.13989	1.19224
TRAPPC3	0.0989077	1.19108
ASNA1	0.158213	1.18377
PDIA4	0.113483	1.18096
NUP50	0.362563	1.17939
SET	0.262737	1.17655
OPLAH	0.064616	1.17374
DNM2	0.383807	1.16911
UBTF	0.117749	1.16739
PSMB10	0.346748	1.16576
CALR	0.109017	1.16492
RPS7	0.0644006	1.16425
GLO1	0.433355	1.16062
RPS14	0.447711	1.15455
RPL31	0.130235	1.15449
DCC	0.700727	1.14726
UBE3A	0.151422	1.14577
CUX1	0.286348	1.14554
ANP32A	0.102025	1.14247
MAN2C1	0.184463	1.14127
ABAT	0.363442	1.14016
CLNS1A	0.232902	1.13987
PRMT6	0.0662689	1.13749
RNMT	0.214172	1.13372
ARHGDIB	0.654826	1.13345
MEMO1	0.291604	1.13311
NAP1L1	0.150258	1.12816
COL9A1	0.671718	1.12197
HNRNPDL	0.520334	1.11981
BZW2	0.0946128	1.11909
HINT1	0.210042	1.11228
OCRL	0.626488	1.11152
RBBP4	0.0787844	1.11148
ARPP19	0.272465	1.11002
CRIP2	0.563918	1.10849
HIST1H4A	0.384905	1.10811
SEPT6	0.0621384	1.10701
FTH1	0.38912	1.10565
VPS25	0.348175	1.10221
EIF4G1	0.057779	1.10079
SYNGR1	0.447565	1.09914
SRSF10	0.339999	1.09699
YARS	0.184062	1.0914
NSFL1C	0.217138	1.09111
RPS5	0.536135	1.08905
NAA10	0.0527898	1.08664
WASHC5	0.34593	1.08417
HDDC3	0.361061	1.07964
TRIM2	0.533895	1.07892
USP7	0.154182	1.07891
NIF3L1	0.0991608	1.07636
CNDP2	0.22369	1.0738
PLCG1	0.334776	1.07345
ZC3H4	0.0887994	1.07212
SMC1A	0.305392	1.06915
DYNC1H1	0.123157	1.06857
YWHAZ	0.104425	1.06665
ASCC1	0.167918	1.06266
CBX3	0.207352	1.05575
TATDN3	0.228758	1.05272
PPP2R5D	0.0630652	1.05086
TNPO3	0.289321	1.049
TUBB4B	0.155844	1.04614
DHFR	0.353151	1.04584
RPLP0	0.248833	1.04407
NLGN3	0.547047	1.04244
MTSS1L	0.359166	1.03968
MDP1	0.118124	1.03954
AMPD2	0.248288	1.03212
MRTO4	0.482846	1.03212
SARNP	0.313938	1.02865
SSBP1	0.0932996	1.02727
TSG101	0.457425	1.02721
SIN3A	0.352634	1.02489
AAMP	0.0519159	1.02484
WDR44	0.0584696	1.02335
PARK7	0.29226	1.02198
GSTM1	0.519736	1.02072
RCC2	0.102126	1.01521
TJP1	0.284557	1.01364
SNRPA1	0.423688	1.00539
PYGL	0.120138	1.00117
IFT27	0.182752	0.999301
PSMB1	0.133418	0.997838
PDCD5	0.115352	0.993441
CLTC	0.18579	0.993156
CACYBP	0.0230165	0.992188
PGD	0.176877	0.992086
MTDH	0.368132	0.990943
PSMA7	0.027595	0.988075
FAM107B	0.0765103	0.982296
GRHPR	0.0752766	0.981134
GRWD1	0.400151	0.979762
APPL1	0.499974	0.975364
NCSTN	0.415847	0.974665
TUBA1B	0.15622	0.974634
RBBP7	0.056534	0.974576
PSMA6	0.205174	0.974237
EIF3J	0.137425	0.973421
TPD52	0.219335	0.970236
NUDC	0.0668082	0.970204
DNPEP	0.102525	0.969487
PAK2	0.228603	0.968707
FNTB	0.094844	0.965172
TMOD2	0.424944	0.962688
CMBL	0.352016	0.959939
PFDN4	0.00538778	0.956483
PRRC2C	0.175955	0.955689
MACF1	0.17705	0.955246
POLR2D	0.272155	0.953898
RPL11	0.180927	0.9537
CAPZA2	0.289991	0.949559
UBA6	0.214429	0.947649
PTGR2	0.167937	0.944768
GMFB	0.299635	0.943878
ACSS1	0.268968	0.943214
ADI1	0.0590527	0.94044
DST	0.284081	0.940007
DHPS	0.305377	0.938382
PSMD11	0.0397027	0.937654
HNRNPA2B1	0.223725	0.937277
NENF	0.475017	0.933232
DPH5	0.398345	0.93011
SRRT	0.445256	0.921459
SPART	0.227565	0.921134
PPIH	0.169351	0.919004
COPS7B	0.112901	0.918292
PPP1R14C	0.387671	0.91778
CRYZL1	0.237922	0.915183
DEK	0.332001	0.913241
SNX2	0.478917	0.912913
RUVBL2	0.154011	0.911519
SUMO3	0.519333	0.910484
SHMT1	0.439822	0.907443
EIF2B5	0.337178	0.906717
HNRNPH3	0.393286	0.905955
PSMD2	0.0201628	0.904263
FKBP4	0.0742233	0.903717
PPIL1	0.267961	0.902683
DOHH	0.130888	0.902575
YLPM1	0.595983	0.902491
SF3B2	0.10608	0.90247
RPSA	0.20992	0.902399
AKAP8L	0.443581	0.8999
PSMC4	0.144816	0.899277
PRDX2	0.475913	0.898292
MOCS2	0.39153	0.897074
MOB1B	0.522133	0.893541
GART	0.318113	0.891275
PPP3CA	0.253132	0.890733
RAD23A	0.0873052	0.89072
PAXX	0.463815	0.889123
BCAT1	0.697286	0.889044
LSM12	0.421034	0.887142
BLMH	0.0342216	0.885939
LDLR	0.328512	0.884369
PSMB8	0.211711	0.883976
CPSF1	0.356543	0.882752
SNX3	0.220063	0.879223
EIF4E	0.0150141	0.876907
LGALSL	0.321354	0.873612
ACTL6A	0.393251	0.873419
NECAP1	0.538554	0.872681
ELAVL1	0.385533	0.869857
ZNF326	0.542528	0.867573
NCL	0.194334	0.866634
SCRN2	0.198894	0.866354
YWHAE	0.0384875	0.865735
MAT2A	0.0245663	0.865015
MCM6	0.218247	0.864712
KPNB1	0.0199132	0.864138
PAPOLA	0.363986	0.863853
TUFM	0.514898	0.863219
SCRN1	0.470193	0.863095
FSCN1	0.0769184	0.861896
SLTM	0.349218	0.86168
AGL	0.056812	0.861189
CAST	0.0732757	0.860977
DHX38	0.2115	0.859353
TK1	0.102101	0.857871
MTHFD1	0.424228	0.85263
ELAC2	0.620755	0.852285
SMC3	0.555123	0.850927
ATXN10	0.133854	0.850856
PPM1G	0.137386	0.850831
AKR1A1	0.340931	0.849422
ADSL	0.311239	0.849206
MYEF2	0.429259	0.847228
SAE1	0.200241	0.846872
HNRNPA1	0.23969	0.844063
COPS4	0.144746	0.841226
EEA1	0.23325	0.839132
MTREX	0.169176	0.83858
LSM2	0.319764	0.835199
TLN1	0.147434	0.834796
SF3A3	0.719732	0.834697
COL15A1	0.698242	0.834102
RANBP3	0.329872	0.833291
EPRS	0.0516202	0.832038
SART3	0.636192	0.831139
CUL1	0.0536327	0.829388
SDSL	0.0587476	0.82456
GLUD1	0.11299	0.822901
MARS	0.200233	0.821309
TPD52L2	0.56542	0.820135
MPST	0.63481	0.818322
RPS10-NUDT3	0.0820522	0.817899
PCNP	0.175225	0.817426
SEPT9	0.311551	0.816852
DCTN6	0.418431	0.814683
PA2G4	0.00128656	0.813991
PNP	0.0647307	0.813522
GLOD4	0.0181552	0.813326
RPAP3	0.361441	0.813248
LDHB	0.0625158	0.813147
SEPT11	0.196184	0.810584
PTPN23	0.463327	0.805823
AGO2	0.19341	0.804677
FLYWCH2	0.458683	0.804281
PSMG1	0.182126	0.804258
PSMD12	0.0804174	0.803973
CCT2	0.0379455	0.803384
EIF6	0.211575	0.802004
PMPCB	0.168302	0.797614
YTHDC1	0.378746	0.797342
HIBCH	0.246294	0.795581
DIP2B	0.600893	0.795386
EXOSC6	0.180488	0.79446
XPO1	0.11517	0.791838
DYNLL1	0.501975	0.791108
DDAH2	0.764061	0.791066
VPS35	0.00909327	0.789101
NFYC	0.231821	0.785203
GIGYF2	0.329456	0.784316
PFKM	0.292386	0.782855
MTAP	0.0850452	0.782575
MAP4	0.0359733	0.781493
RAN	0.282259	0.781284
MAGOHB	0.0836026	0.78105
ACOT7	0.212168	0.779037
DCXR	0.302557	0.777996
DCTN2	0.262209	0.777749
UBQLN1	0.265883	0.777045
SHMT2	0.651306	0.776756
ARID1A	0.350585	0.776644
TROVE2	0.114745	0.774947
KYAT1	0.0989145	0.772598
PSPH	0.0912179	0.771641
DPP3	0.272903	0.771294
UBA1	0.219882	0.770816
ACO1	0.0713806	0.7705
HDHD5	0.428645	0.770175
DRG1	0.158518	0.769293
EPS15	0.577642	0.769231
PSMC3	0.148205	0.768625
ILF3	0.266881	0.768482
TBC1D4	0.509779	0.768134
MCM7	0.52065	0.767167
TSN	0.331813	0.767004
XRCC5	0.294081	0.76446
CDV3	0.314838	0.763847
RAB3GAP2	0.45818	0.762753
KPNA3	0.486327	0.762462
SEPT2	0.354403	0.761398
PFN2	0.146665	0.761332
HTATSF1	0.463905	0.760551
PPA1	0.134283	0.760477
PARP1	0.114528	0.75905
COPS5	0.247847	0.757902
HNRNPA3	0.363151	0.757528
KTN1	0.489561	0.75585
TSNAX	0.195792	0.753658
CBFB	0.215618	0.753367
VRK1	0.498783	0.749224
NLN	0.299751	0.748976
HNRNPD	0.267203	0.748033
ROCK2	0.225053	0.747719
PPAT	0.101577	0.74682
LARS	0.19519	0.746746
PUS1	0.189564	0.74656
GOT1	0.0697124	0.745408
FAF1	0.333518	0.744054
THOP1	0.255875	0.743231
PPP2R2A	0.120281	0.742687
NIT2	0.149671	0.742226
PPP5C	0.125694	0.741438
PREP	0.204563	0.74133
SNRPD1	0.258535	0.740892
GINS2	0.162482	0.739503
TXNRD2	0.538714	0.737412
NDRG3	0.502648	0.73592
VBP1	0.149167	0.735872
CADM1	0.463667	0.734634
DFFA	0.551902	0.734383
COMMD8	0.521393	0.734127
UBE4A	0.200938	0.731077
CUL4A	0.534859	0.729736
CTPS2	0.474649	0.729595
RBM8A	0.329987	0.729122
SPAG9	0.330685	0.728694
STK24	0.350459	0.727303
APRT	0.420124	0.727273
S100A1	0.749827	0.726688
C11orf54	0.418669	0.721511
CNRIP1	0.284968	0.720813
DYNC1LI1	0.0492584	0.720226
GALM	0.13889	0.720083
RANGAP1	0.365588	0.720073
na	0.105561	0.720071
GSS	0.181771	0.719261
DRAP1	0.0276255	0.718927
SSU72	0.477361	0.718521
GALK2	0.703317	0.71772
PPP1R14B	0.520231	0.717319
ACTR1A	0.318042	0.717008
SF3A1	0.0933706	0.716776
MAT2B	0.125374	0.716361
MYL6B	0.482671	0.714975
PSMB2	0.114456	0.714518
PPP4R3A	0.229657	0.714303
HMGB1	0.0897057	0.702729
SH3GL1	0.535385	0.701149
CASK	0.334738	0.69854
DDX39B	0.105014	0.697641
PRPF8	0.420731	0.697014
PPP2CA	0.13942	0.696687
EIF3A	0.269681	0.696008
OSGEP	0.04346	0.6957
EIF4EBP1	0.234718	0.695248
EIF3I	0.135311	0.694253
COL4A1	0.519783	0.69206
DTD1	0.194417	0.690633
GPS1	0.409495	0.690499
CBX5	0.434144	0.689793
LRRC59	0.407276	0.689741
HNRNPR	0.612654	0.689133
L3HYPDH	0.125552	0.687
HSP90B1	0.323256	0.683854
PODXL2	0.618641	0.683299
BAG6	0.21509	0.681706
GARS	0.0248628	0.681627
FKBP3	0.154949	0.675515
DSTN	0.675232	0.67513
TBCA	0.602433	0.674505
FAH	0.152232	0.67411
PPM1A	0.257399	0.670408
NONO	0.76906	0.667984
CSTF1	0.16509	0.667398
GAPDH	0.379339	0.666885
PFDN5	0.25146	0.6662
CYCS	0.191724	0.666182
ITSN1	0.326075	0.662699
CPOX	0.370338	0.661451
DHX9	0.33242	0.661406
TTC37	0.14064	0.659846
PLCB3	0.561517	0.659709
DDX1	0.301882	0.65946
ROCK1	0.256725	0.659431
GNPNAT1	0.207861	0.658776
DDB1	0.322714	0.658127
S100B	0.359759	0.652709
TCEA1	0.550164	0.650588
SEPT10	0.807363	0.650545
WDR1	0.243515	0.650199
EPS15L1	0.632428	0.650117
EIF4H	0.366973	0.645052
ISYNA1	0.385324	0.643993
EIF2S2	0.405197	0.643173
NLE1	0.154082	0.643069
AASDHPPT	0.34015	0.64248
NUDT19	0.533788	0.642133
SF3B3	0.377901	0.640449
DIEXF	0.0919094	0.638579
CUL4B	0.401261	0.635589
COPS6	0.317313	0.6347
PRKDC	0.270669	0.634569
ILF2	0.520866	0.633626
TATDN1	0.673797	0.631969
PIR	0.839752	0.630034
PSMD13	0.221475	0.629125
HMBS	0.332421	0.628365
GPKOW	0.48797	0.628301
RBM39	0.191704	0.627288
GPI	0.0761676	0.627204
ACYP1	0.256966	0.624615
ABHD14B	0.443341	0.62436
UBE2M	0.6179	0.624266
HSPA1A	0.0260375	0.620838
CARM1	0.691968	0.620609
RBFOX2	0.436611	0.61906
RAB7A	0.42143	0.618346
EWSR1	0.576226	0.616727
PSMC2	0.288363	0.616459
SRSF2	0.565545	0.61633
HYPK	0.472122	0.615952
SEPT7	0.295491	0.614667
TRIP11	0.800839	0.614276
NCK1	0.623894	0.613274
PFN1	0.563067	0.610783
RAE1	0.116416	0.610041
IDE	0.244807	0.607899
HIST1H2AG	0.632112	0.607693
ASNS	0.455684	0.607644
OGFR	0.367301	0.607264
PRKAR2A	0.0981319	0.6056
YWHAQ	0.255492	0.605483
CUL3	0.324466	0.601974
CNDP1	0.858118	0.601279
BTF3L4	0.33205	0.600333
PPIL4	0.381929	0.600249
STRAP	0.108023	0.599255
ALDOC	0.115042	0.595394
RPS3A	0.696938	0.595109
NACA	0.416268	0.59487
EXOSC8	0.452245	0.591981
ESD	0.303455	0.590749
SRRM2	0.166308	0.588393
CSPG4	0.055006	0.58607
PODXL	0.726785	0.585592
PRPF4	0.604064	0.584747
SSRP1	0.237276	0.584379
ACO2	0.572535	0.582263
RPLP2	0.190217	0.579739
WBP2	0.459342	0.577563
CRYZ	0.0722903	0.576
HDHD2	0.121822	0.575253
HIST1H1E	0.666464	0.57457
EIF1AX	0.462225	0.573644
RBM12	0.512559	0.573542
LZIC	0.578405	0.573322
ENPP2	0.886222	0.571003
SPTBN1	0.123375	0.570854
TIAL1	0.377736	0.570432
RSF1	0.405891	0.567807
PGM3	0.145852	0.566954
CLINT1	0.229395	0.565035
HEBP2	0.426361	0.562978
PSMC1	0.0820295	0.562092
UNC45A	0.489609	0.561755
NEK9	0.661881	0.559098
SEPHS1	0.46406	0.558533
SNW1	0.463751	0.557142
NME1	0.626053	0.556538
PAFAH1B3	0.11676	0.554649
SF1	0.595082	0.552546
AMDHD2	0.0668267	0.550758
C9orf64	0.668578	0.550496
EIF3C	0.298842	0.550047
DENR	0.192135	0.548409
CELSR2	0.598683	0.547311
TRMT112	0.474687	0.547182
PSMG3	0.453299	0.546496
BZW1	0.382008	0.545592
RTCA	0.768406	0.54458
ITPA	0.505328	0.544521
ARMT1	0.0157141	0.544013
AIF1L	0.356421	0.541569
GTF2I	0.391893	0.541407
EFL1	0.538011	0.539095
TPRKB	0.286418	0.539062
GNAO1	0.544139	0.538615
ASL	0.47292	0.538582
NDRG2	0.238628	0.538172
GSTM2	0.557756	0.537161
YWHAG	0.0578909	0.53565
ISOC1	0.319629	0.534414
MOSPD2	0.469339	0.534127
PTPRJ	0.704531	0.532995
TRMT61A	0.562721	0.531203
PLPBP	0.379511	0.530952
HINT2	0.743361	0.530649
GOLIM4	0.465124	0.530054
PITHD1	0.242682	0.529371
USP11	0.692942	0.528656
UGP2	0.392144	0.528627
NAP1L4	0.57059	0.527506
PRMT5	0.161887	0.525588
SMS	0.0257389	0.524701
HNRNPF	0.305129	0.524534
RPS21	0.563293	0.524101
ACY1	0.313697	0.523984
CRKL	0.3552	0.523158
RIDA	0.591492	0.522442
CAP2	0.481471	0.521769
ADGRL3	0.788464	0.520442
PRDX1	0.568975	0.520117
UROD	0.19048	0.519117
CASP3	0.409181	0.518627
PSMC6	0.227735	0.516663
PDZD11	0.667856	0.514141
RUVBL1	0.34008	0.514051
IARS	0.240269	0.512645
UCHL3	0.481745	0.512292
GSR	0.00245245	0.51061
RBBP5	0.702092	0.507733
G3BP1	0.329036	0.507022
APOBEC3C	0.68099	0.507016
TPT1	0.659959	0.506703
UCHL1	0.666751	0.505264
PPA2	0.384997	0.504534
ADSS	0.0976787	0.504358
FNTA	0.368418	0.50377
AP1S2	0.643745	0.503253
CTPS1	0.448295	0.502228
RRM1	0.529887	0.501375
LMNB1	0.457349	0.500257
PSMC5	0.196359	0.499565
GABARAPL2	0.000397045	0.499424
VARS	0.380773	0.499091
MAPRE1	0.279517	0.49841
SEPT8	0.615265	0.497408
UPF1	0.469943	0.496601
COPS3	0.462285	0.496456
GNPDA1	0.108629	0.496085
SNRPA	0.282428	0.493328
PAPSS1	0.526685	0.492612
DCK	0.188323	0.490395
LHPP	0.819469	0.489096
COL19A1	0.698142	0.488714
FUBP1	0.775033	0.487482
TRNT1	0.401612	0.487033
PPID	0.505159	0.486774
PCMT1	0.541446	0.486392
IARS2	0.72565	0.486375
MAP2K1	0.483083	0.48469
SUMO2	0.63825	0.484448
RPS18	0.691681	0.483934
HARS	0.00592229	0.483608
PRMT1	0.560982	0.483044
PDXP	0.339741	0.482908
MAPK12	0.305805	0.482859
NEDD8	0.103696	0.482855
SMC2	0.46161	0.4815
RACK1	0.0167213	0.480324
RBM15	0.365703	0.479329
U2AF2	0.612689	0.478758
UCHL5	0.465101	0.478423
FN3KRP	0.317369	0.477009
NAA20	0.312776	0.47662
ILKAP	0.727341	0.468716
RAB2A	0.610448	0.467139
SPIN1	0.709083	0.462159
DCTPP1	0.462705	0.461234
BLVRA	0.317453	0.460708
MCTS1	0.527503	0.457279
PMP2	0.800512	0.454535
PUF60	0.4547	0.454335
POLR1C	0.57921	0.451314
KCTD12	0.90095	0.448814
HAPLN1	0.770359	0.448483
PPP6C	0.371264	0.447874
PYM1	0.474777	0.447844
TXNL1	0.180002	0.446437
LANCL1	0.527206	0.443623
GGA1	0.486812	0.443283
GPX1	0.699558	0.443282
EDF1	0.576119	0.443216
RRP9	0.526461	0.441877
PSMD14	0.24494	0.441748
RPS15A	0.654159	0.441675
PPP1R12A	0.50712	0.441
RIOX2	0.531334	0.4397
ATIC	0.235282	0.439187
HSPB11	0.553453	0.437913
VPS26B	0.275227	0.436767
CORO7	0.643974	0.436406
DDAH1	0.330104	0.436321
XRCC6	0.523822	0.434354
PUDP	0.556154	0.434142
SERPINH1	0.901768	0.431339
KARS	0.126177	0.430239
NCBP1	0.628403	0.429495
PCNA	0.548986	0.428029
GRPEL1	0.6077	0.42759
UBE2Z	0.632391	0.426942
PACSIN2	0.592512	0.42647
ELP1	0.202335	0.425781
PPP3R1	0.586557	0.425063
COPS8	0.548499	0.424576
CAPZA1	0.396871	0.42401
DNAJC10	0.6038	0.423286
HAT1	0.384238	0.422954
NHEJ1	0.549062	0.422878
ECI1	0.533529	0.421792
PEBP1	0.202909	0.417872
ENPP1	0.764033	0.4176
CAPRIN1	0.641069	0.416876
PCBD1	0.716371	0.414238
GCSH	0.628749	0.414061
ETF1	0.289854	0.41389
SRP9	0.827949	0.413557
PURA	0.818611	0.412753
SYNCRIP	0.603732	0.411779
YME1L1	0.349645	0.411488
MIF	0.280014	0.41081
TPM3	0.150947	0.407489
MOV10	0.0618657	0.407194
PPIE	0.402176	0.407176
LRP4	0.612448	0.407151
DPYSL3	0.40543	0.405021
LUC7L2	0.182894	0.404684
PABPC1	0.672308	0.403971
GEMIN6	0.397501	0.402647
UBFD1	0.583488	0.401727
CAB39	0.169692	0.401445
C5orf22	0.0647038	0.401156
IDH1	0.677749	0.39923
EIF2A	0.623027	0.398788
FBXO22	0.329707	0.398674
PPP4C	0.242364	0.398116
PPP6R1	0.657829	0.397873
KPNA4	0.466176	0.397273
GFPT1	0.642513	0.396884
EIF2S1	0.651336	0.396334
UBB	0.401064	0.395258
KIF1BP	0.342129	0.39083
EXOSC9	0.580686	0.388433
AGO1	0.653648	0.386689
MESD	0.601098	0.386267
BANF1	0.76457	0.384994
EIF5B	0.554327	0.383907
HPRT1	0.735556	0.382884
CCT4	0.182954	0.382376
SORD	0.327739	0.381729
RPL5	0.762725	0.378698
RABL6	0.635853	0.376097
HSPB1	0.645846	0.375282
CCDC58	0.206175	0.372342
FLII	0.757291	0.369786
NEO1	0.560575	0.36975
VPS29	0.779902	0.367927
PGRMC2	0.507197	0.366558
TBCB	0.596482	0.365931
PPP2R1A	0.373987	0.365616
PTK2	0.861507	0.363802
PAFAH1B2	0.751947	0.362324
SUB1	0.684025	0.362099
RPS8	0.761334	0.358964
SMARCC2	0.57323	0.355305
RABEP1	0.645268	0.354806
LASP1	0.300382	0.353687
AP1G1	0.590246	0.35362
CCDC43	0.81024	0.352043
FLNB	0.325616	0.350549
WDR61	0.279393	0.348929
TXNL4A	0.117727	0.348843
SRSF9	0.681701	0.346368
HNRNPU	0.661928	0.346281
SRA1	0.501008	0.346136
LSM8	0.51818	0.345216
UBA5	0.623484	0.34472
SARS	0.0688795	0.344533
CDK6	0.6952	0.343508
DCTD	0.771887	0.342756
DHRS11	0.800062	0.339975
LRRC47	0.57134	0.33997
PNPO	0.352825	0.339931
ENOPH1	0.516013	0.33799
YBX3	0.339354	0.336155
CHMP3	0.829219	0.335588
STIP1	0.426001	0.335366
MCMBP	0.2423	0.334534
SNRPB	0.697416	0.333899
EIF3M	0.385219	0.332109
PSMD7	0.353267	0.330608
ARPC4	0.628238	0.328726
RAB10	0.592546	0.328248
RRM2B	0.622616	0.328152
ENO1	0.637998	0.328016
XPNPEP1	0.57285	0.327257
BIN1	0.66742	0.325998
RAB4A	0.809549	0.325553
NUP37	0.177731	0.324607
PGRMC1	0.495061	0.324587
GDI1	0.663578	0.32185
OTUB1	0.652148	0.321308
MCM3	0.62372	0.320267
SGTA	0.255023	0.320162
EXOSC4	0.413593	0.316645
PTPRZ1	0.724599	0.316635
UFC1	0.816307	0.316472
SEC24A	0.564248	0.316198
CCT5	0.203025	0.315603
MPI	0.574309	0.315444
PTPA	0.62885	0.315141
CUL2	0.517871	0.314865
PRDX5	0.732411	0.313735
CCT7	0.349254	0.312217
UBA3	0.559683	0.309828
EFTUD2	0.523783	0.309813
PTBP1	0.654332	0.307076
RPL7	0.813804	0.306876
DCPS	0.212518	0.305199
MKI67	0.851516	0.303102
HNRNPM	0.727132	0.302952
FAHD2A	0.707973	0.302776
RPS9	0.610402	0.299872
THUMPD1	0.58414	0.299146
ARHGAP17	0.491527	0.298557
BUB3	0.62277	0.295955
GDI2	0.366258	0.295253
VPS36	0.807643	0.294959
CARS	0.245235	0.294793
MRGBP	0.524456	0.292318
METAP2	0.793173	0.290401
TENM3	0.917581	0.290263
RPL35A	0.777453	0.289536
IGBP1	0.819817	0.288605
PPIA	0.720689	0.288331
DIS3	0.834974	0.288197
POLR2G	0.658588	0.287761
RMDN3	0.50834	0.287022
COPS7A	0.78402	0.28689
MAVS	0.76196	0.286701
RBM25	0.786472	0.286098
FARSB	0.552103	0.28537
SF3B1	0.795864	0.283147
C20orf27	0.566959	0.283138
RPS25	0.681368	0.283042
EIF3E	0.329347	0.282846
RPS17	0.841225	0.281893
CTTN	0.876602	0.281819
ZC3H14	0.386986	0.280808
C1orf50	0.57234	0.28016
SAFB	0.742935	0.279556
CLPB	0.233641	0.279112
LACTB2	0.685739	0.278991
IMMT	0.791774	0.278929
RPA3	0.739977	0.277794
DDX46	0.41056	0.276379
PSMD6	0.260387	0.276253
HNRNPA0	0.868418	0.275786
GRB2	0.370747	0.275224
CCNE1	0.683222	0.274356
PABPN1	0.812491	0.273456
TBC1D22A	0.481052	0.271531
FTO	0.751876	0.265923
CACNA2D1	0.808287	0.265759
OXSM	0.543874	0.264824
TERF2IP	0.782553	0.263515
NEDD4L	0.821861	0.262613
ARRB2	0.695793	0.261915
SUPT5H	0.419037	0.261229
AKR7A2	0.638092	0.258101
GCLC	0.704899	0.257336
PSMD9	0.450803	0.257119
RPS4X	0.841414	0.256517
AFDN	0.700703	0.256372
SEC24C	0.749566	0.25564
APP	0.830038	0.254639
DCTN5	0.73214	0.253335
CDK5RAP3	0.545209	0.253256
EMD	0.764371	0.252
CDC37	0.578843	0.251136
RGMB	0.791983	0.250505
PSMF1	0.630086	0.249499
NMT1	0.484939	0.249435
SNX5	0.773672	0.248907
UBE2V2	0.302061	0.247967
NECAP2	0.554903	0.247256
GAA	0.664379	0.24678
GLTP	0.552865	0.246768
SORBS2	0.849542	0.246665
CKMT1A	0.93116	0.245739
TTC38	0.446246	0.245516
EIF4A2	0.817404	0.24349
SDHA	0.748638	0.242773
TCP1	0.442646	0.241258
UBAP2L	0.861432	0.240091
PSMD8	0.655102	0.238335
NSF	0.383244	0.237889
OSTF1	0.774703	0.237591
NUDT5	0.672055	0.237021
EXOSC2	0.590998	0.236789
PBDC1	0.511338	0.236718
BABAM1	0.713147	0.23591
RNH1	0.472721	0.235547
TYMS	0.867839	0.235513
PLEC	0.63634	0.232419
MYLK	0.880204	0.230141
CEP170	0.763883	0.229737
NUDT2	0.786482	0.229735
ARMC10	0.850705	0.229249
FHIT	0.648154	0.229051
DYNLRB1	0.718098	0.22762
COPB2	0.621994	0.227319
PPP1CB	0.613204	0.226748
CFAP20	0.779042	0.222954
UTRN	0.862438	0.222764
PAICS	0.618955	0.222675
HSPA8	0.480752	0.219718
CSK	0.728387	0.218957
AHCY	0.643873	0.218529
C11orf68	0.825415	0.216742
OLA1	0.500713	0.215455
TBL1XR1	0.672147	0.21499
CSTF2	0.685772	0.212196
DNAJC9	0.790134	0.2103
BAG2	0.759088	0.208645
HK1	0.502636	0.208052
PDPR	0.805354	0.207527
ARPC1A	0.885156	0.206795
NCKAP1	0.679014	0.20639
QDPR	0.666204	0.205729
RRBP1	0.607831	0.205472
PPM1B	0.831333	0.202264
NCAM1	0.786859	0.200996
VPS26A	0.595753	0.197755
FUS	0.808718	0.197061
EIF4A1	0.190077	0.196419
NUSAP1	0.67265	0.195221
COL4A2	0.853936	0.194891
HSPA5	0.609971	0.193773
NAXD	0.733427	0.19364
C1QL4	0.844536	0.192099
IMPA1	0.629573	0.191875
NUDT21	0.539913	0.189245
PSMD10	0.808189	0.188892
CSTF3	0.693675	0.188864
TIPRL	0.589382	0.188273
MARCKS	0.823121	0.188059
TLE1	0.779823	0.186982
REXO2	0.871314	0.186698
CORO1C	0.782134	0.186509
PPM1F	0.468097	0.183798
ADA	0.363105	0.182566
SYAP1	0.53454	0.182316
DNAJC2	0.739602	0.182215
FAM49B	0.723143	0.180681
SEC23B	0.7886	0.180337
TALDO1	0.430043	0.179038
GANAB	0.743206	0.177327
VTA1	0.784824	0.176385
PDCD6IP	0.691618	0.173754
PCBP1	0.743709	0.173372
GAS7	0.922916	0.172343
COPG1	0.787515	0.171609
CCS	0.510888	0.170619
AIMP2	0.6819	0.169943
FAM234A	0.603939	0.169051
NARS	0.715114	0.168647
MAP1B	0.898997	0.16841
ATXN2L	0.755191	0.168166
OPA1	0.778976	0.167273
HSPD1	0.691463	0.166765
DNAJC8	0.526821	0.165655
CCT6A	0.238432	0.165211
UBXN4	0.909189	0.163211
SCARB1	0.736051	0.161965
PSMB9	0.672323	0.161622
MSN	0.655251	0.161515
RAB21	0.667354	0.160318
CDKN2A	0.922394	0.157324
DCTN4	0.893993	0.157307
SUCLG2	0.852387	0.1567
PLAA	0.908023	0.155083
ASRGL1	0.848213	0.151807
CCT8	0.700605	0.151331
DNAJC17	0.819628	0.150892
PEPD	0.817301	0.150751
PPCDC	0.854417	0.150023
NT5C	0.708309	0.148813
SYMPK	0.911429	0.145642
UBL4A	0.665685	0.145072
ZNF207	0.935007	0.144884
UBR1	0.82042	0.142642
TKFC	0.832457	0.141335
COPB1	0.807017	0.140572
LYPLAL1	0.891732	0.140539
JMJD7	0.819665	0.139296
EIF3G	0.730707	0.138828
GOLGA3	0.902651	0.136802
NAMPT	0.805759	0.135157
TSTA3	0.718524	0.134901
RAB14	0.868149	0.134786
LARP7	0.897907	0.134395
PDE6D	0.790748	0.134382
SCRN3	0.712889	0.132582
OGDH	0.886752	0.132507
NOL7	0.866857	0.132341
DTYMK	0.933079	0.130819
AK2	0.835896	0.130234
TUBB4A	0.938653	0.129761
UFM1	0.850218	0.128969
TFG	0.85582	0.128479
NPM1	0.891841	0.126616
GCLM	0.830958	0.125717
SGTB	0.921233	0.121017
ABHD10	0.901942	0.119799
SPTAN1	0.810236	0.119753
HMCN1	0.974792	0.119613
CBR3	0.862675	0.119249
WDR92	0.913852	0.117322
PDS5A	0.888605	0.116397
SLC9A3R1	0.933291	0.116238
ADNP	0.84626	0.115726
THOC3	0.806358	0.112129
SMU1	0.837561	0.11083
SPHK1	0.874705	0.110395
PSMG4	0.899744	0.110235
GNPDA2	0.8804	0.109953
CSNK2A1	0.757855	0.108343
CKB	0.642889	0.108305
ALCAM	0.92491	0.106738
HK2	0.898977	0.106604
C1orf123	0.831685	0.106212
FKBP5	0.839235	0.105622
DLD	0.872408	0.105509
OXCT1	0.883249	0.102899
PPIB	0.948038	0.102574
RPA2	0.853404	0.1001
SERBP1	0.890848	0.0984376
ATP5F1B	0.831055	0.097812
GMPS	0.87312	0.0977834
EIF3F	0.792412	0.097442
RAB6A	0.811742	0.0968043
ACIN1	0.866695	0.0958023
ARPC5L	0.879239	0.0957991
TPI1	0.920862	0.0944316
PTER	0.862236	0.0941709
CBR1	0.969726	0.093626
DIABLO	0.894796	0.0931562
RWDD1	0.949797	0.0925102
RCC1	0.908603	0.0908413
OXSR1	0.896636	0.0907663
ACBD3	0.835116	0.0901998
BCAS2	0.834709	0.0888144
EIF3H	0.81486	0.0878296
PPWD1	0.86764	0.0877018
INF2	0.964373	0.0859057
HERC4	0.916298	0.0827904
GSTP1	0.851651	0.0808849
GNAI1	0.934951	0.080574
AP1B1	0.837733	0.0805073
SEMA4D	0.913448	0.0797393
CFL2	0.879041	0.0789159
CRK	0.733397	0.0786069
COMMD3	0.929444	0.0779527
IAH1	0.94668	0.0770035
FH	0.887288	0.0752621
VCAN	0.937919	0.0745468
DHX15	0.919377	0.0739104
ERBB3	0.953721	0.073843
RBM10	0.961751	0.0737743
AP1M1	0.88948	0.0727781
LTA4H	0.926104	0.0698872
HDGFL2	0.971538	0.064642
HACD3	0.910299	0.0636527
HIBADH	0.960776	0.062074
LMNB2	0.959506	0.0603479
TKT	0.869393	0.0572923
FBL	0.894822	0.0563227
BDH2	0.907088	0.0545508
CHORDC1	0.912511	0.0540466
POLDIP2	0.970077	0.0538686
ENSA	0.914458	0.0533314
HCFC1	0.970692	0.0526479
APLP2	0.91407	0.0522995
ETFB	0.88404	0.0502892
MRI1	0.902333	0.0491918
SLC3A2	0.939329	0.0490341
POLR2H	0.801834	0.0474294
MARCKSL1	0.923934	0.046814
PCBP2	0.945304	0.046751
PHPT1	0.936688	0.0461566
CYFIP1	0.913131	0.0453447
BAG5	0.963026	0.0450497
CHKB	0.92945	0.0439224
ALDH16A1	0.951197	0.0437889
RPN1	0.833012	0.0420469
CCT3	0.874026	0.0420208
PITPNB	0.930272	0.0415649
QKI	0.945792	0.0414543
AIFM1	0.966146	0.0402203
STUB1	0.967124	0.0399119
GNS	0.958499	0.0375239
STAM	0.964959	0.0359802
UAP1	0.95911	0.032409
KHSRP	0.985556	0.0323232
ACTN4	0.921344	0.0319494
PGP	0.827743	0.0314236
NANS	0.938661	0.0307344
NLGN4X	0.985505	0.0305653
PLRG1	0.9231	0.0298926
EEF1G	0.882106	0.0298913
MVB12B	0.983093	0.0297267
STRN	0.915541	0.0289815
SCAF4	0.986227	0.0288181
RALA	0.974356	0.0278873
PSMG2	0.966893	0.0271047
SEC23IP	0.967417	0.0264225
GSTO1	0.9409	0.0261701
SIRT5	0.941207	0.0244001
PSME3	0.913276	0.023222
RANBP2	0.955068	0.0223529
ADPRHL2	0.96134	0.0218449
DCUN1D1	0.912447	0.0218163
MAP1LC3B	0.981254	0.0203323
PRPSAP2	0.963827	0.019736
SLC26A2	0.959627	0.0190856
FARSA	0.978366	0.0190131
TSEN15	0.978719	0.0186316
FLOT1	0.969354	0.0183125
ATP6V1E1	0.983449	0.0152556
SEC13	0.98522	0.0137628
FXR1	0.99097	0.0129642
FKBP7	0.983377	0.0113824
LRRFIP1	0.993277	0.00385984
MCM5	0.996754	0.00343259
DDX5	0.998065	0.00243251
ARHGAP18	0.998523	0.00212161
RCN2	0.997363	0.00146675
ABCF2	0.998297	0.00132624
RBMX	0.998829	0.000770569
LAMP1	0.999386	-0.00130463
GAMT	0.996625	-0.00192134
SRP14	0.993681	-0.00424767
UBE2G1	0.990981	-0.00464122
ACTN1	0.991567	-0.00476392
AIMP1	0.992485	-0.0057106
SNRPB2	0.992595	-0.00684802
VAPB	0.995014	-0.00744311
LRRC20	0.98425	-0.0103804
CPPED1	0.986747	-0.0116005
ENPP4	0.992469	-0.0138003
USP14	0.981145	-0.0144761
IQGAP1	0.963517	-0.0155271
SH3GLB1	0.980675	-0.0161158
MORF4L2	0.957844	-0.0161578
HECTD3	0.97554	-0.0187505
CBS	0.964709	-0.0189355
ADK	0.958025	-0.0191046
PRPSAP1	0.98878	-0.0211379
EIF2S3	0.977713	-0.0213693
FAHD1	0.976844	-0.0223618
AKR1B1	0.933917	-0.0227693
COPA	0.954904	-0.0235411
TPM4	0.965234	-0.023702
GIT2	0.965305	-0.0247116
CTHRC1	0.973571	-0.0288556
NRBP1	0.966426	-0.0289529
HSPA9	0.969252	-0.0304724
RPRD1A	0.977401	-0.031037
RNPEP	0.93526	-0.0312494
LAMP2	0.960187	-0.0322316
ACTR2	0.947783	-0.0328248
AP3B1	0.947692	-0.0329641
PPT2	0.973255	-0.0351391
SCLY	0.959904	-0.0352103
DDX23	0.971287	-0.0358098
HS1BP3	0.96478	-0.0363585
PGK1	0.965381	-0.0371056
ROBO2	0.977682	-0.0378787
PGAM1	0.940682	-0.0383511
ARFGAP1	0.938615	-0.0396175
EPHB3	0.924059	-0.0407365
PDXK	0.820799	-0.0429249
PRDX6	0.88977	-0.0442588
STX7	0.939831	-0.0460529
ECH1	0.948934	-0.0466436
CHAF1B	0.952773	-0.0468795
PIN4	0.784881	-0.0524673
SPINT1	0.96243	-0.052803
GGCT	0.826995	-0.0534032
LSM4	0.961858	-0.0545801
HIKESHI	0.968876	-0.0550798
EIF2B2	0.900026	-0.0557372
TUBG1	0.887092	-0.0558484
ASF1A	0.906637	-0.0567017
ABI1	0.934733	-0.0568549
CUTA	0.875718	-0.0569267
SCARB2	0.966008	-0.0579046
OSBPL1A	0.953485	-0.0585244
BAX	0.871414	-0.0598418
CCDC25	0.864667	-0.0599168
HDLBP	0.935062	-0.0609004
PGM2	0.843036	-0.0614223
SEMA6A	0.972351	-0.0625165
EPB41L1	0.931941	-0.0632362
RAB1A	0.851637	-0.0650311
ANXA2	0.954118	-0.0652657
BCAT2	0.946016	-0.0652936
QARS	0.901529	-0.0658391
PRDX4	0.943205	-0.0676613
RPRD1B	0.875716	-0.0681438
RGS10	0.912543	-0.0707982
COMMD9	0.91569	-0.0738042
DSG2	0.932837	-0.0751801
UPF3B	0.912995	-0.0758864
ECHDC1	0.966573	-0.0792516
MORF4L1	0.836841	-0.0794131
HIST2H2BE	0.890809	-0.079649
ASPA	0.923879	-0.0802352
ZFR	0.819285	-0.0831547
UFD1	0.848566	-0.0832176
ADAR	0.877858	-0.0834192
PRPF19	0.733236	-0.0837612
POR	0.962149	-0.0840836
PGLS	0.918363	-0.0856794
LIN7C	0.855255	-0.0861619
BPNT1	0.800195	-0.08653
RPL13	0.937292	-0.0887178
RBX1	0.926873	-0.0898673
ACTR10	0.916394	-0.0907993
PAPSS2	0.777494	-0.0908502
COPG2	0.956051	-0.092308
RHOA	0.748654	-0.0935383
UFL1	0.958771	-0.0937856
DERA	0.931213	-0.0943292
EIF2B1	0.680923	-0.0945314
RBBP9	0.846695	-0.0962067
TIMM13	0.884002	-0.0970554
CLASP1	0.894016	-0.097098
PCYOX1L	0.819009	-0.0981808
MDH1	0.888394	-0.0993589
ARPC3	0.754885	-0.101916
KREMEN1	0.751292	-0.103097
PAIP1	0.936426	-0.104456
CTNNA1	0.869959	-0.108302
LAP3	0.733768	-0.110144
MYO6	0.840822	-0.111432
LRRC57	0.907455	-0.111574
TWF2	0.836546	-0.111659
SEC23A	0.859246	-0.111795
EPHA4	0.674078	-0.114451
MFNG	0.769424	-0.114656
DBNL	0.900741	-0.117174
TSKU	0.783404	-0.119241
BTF3	0.851413	-0.120018
CARHSP1	0.896457	-0.120975
na	0.513462	-0.122049
CMTR1	0.829139	-0.12221
HGS	0.840617	-0.124597
DYNC1LI2	0.864143	-0.126054
DYNLT1	0.794594	-0.127988
PTPN11	0.738062	-0.129969
CA14	0.869045	-0.131657
ADH5	0.941876	-0.132162
FIS1	0.84816	-0.1322
AP2A2	0.855737	-0.13326
IMPDH2	0.83772	-0.133298
ELOC	0.403412	-0.134614
NUTF2	0.949657	-0.134624
PRTFDC1	0.877013	-0.136352
SORT1	0.763101	-0.138001
CNPY2	0.881894	-0.138467
SNX12	0.559581	-0.139776
BROX	0.580683	-0.140003
RTFDC1	0.764165	-0.140179
RCN1	0.733226	-0.141181
HMOX2	0.68636	-0.142612
PANK4	0.866517	-0.142783
RAB1B	0.781738	-0.145905
CALM1	0.815109	-0.147616
SFPQ	0.84784	-0.148348
GSK3B	0.820768	-0.149326
RABGGTB	0.892926	-0.152751
NQO1	0.909984	-0.153115
MAPK14	0.580823	-0.153521
PGM1	0.827879	-0.155567
CRYL1	0.925909	-0.155837
GMDS	0.797276	-0.156243
SF3B4	0.773318	-0.157882
COPE	0.754658	-0.160138
KIT	0.935466	-0.162082
FARP1	0.742405	-0.162303
BCHE	0.917578	-0.162329
CASTOR2	0.831906	-0.162618
LSM6	0.632505	-0.162661
RDX	0.556313	-0.162766
DDX17	0.800239	-0.165482
CANX	0.75583	-0.167227
UBE2L3	0.61157	-0.168239
NME4	0.886803	-0.169844
DDX3X	0.334783	-0.173801
UGGT1	0.743194	-0.174423
SND1	0.799706	-0.174538
TOM1	0.716447	-0.176136
SF3B6	0.868415	-0.176819
BCLAF1	0.914705	-0.177311
GPRC5B	0.853032	-0.177739
DLG1	0.701383	-0.177977
PTPRG	0.85759	-0.179928
LIMA1	0.80509	-0.18015
RAP1GDS1	0.529842	-0.181095
TXNDC5	0.809756	-0.182092
RBM27	0.86944	-0.182138
DNAJB4	0.867707	-0.182952
DDT	0.848895	-0.185598
ECHS1	0.747228	-0.188131
GSTZ1	0.782395	-0.189801
PAFAH1B1	0.136585	-0.189824
PPME1	0.773507	-0.190065
PRDX3	0.732074	-0.190298
ZPR1	0.839973	-0.191469
TNFSF13B	0.944268	-0.191724
BPHL	0.90914	-0.192234
BAG3	0.754218	-0.192945
GOT2	0.700043	-0.193466
PSME2	0.651114	-0.194596
PPP1CA	0.680793	-0.196117
EIF2B4	0.841963	-0.198601
GM2A	0.88503	-0.198927
SOD2	0.866907	-0.199346
IMPACT	0.80084	-0.201156
CDK4	0.654788	-0.201414
WDR13	0.444922	-0.201546
ARF6	0.729029	-0.202518
PSME1	0.603451	-0.204443
SRSF1	0.779076	-0.205018
GALT	0.847182	-0.207282
ZBTB8OS	0.449442	-0.208492
GIT1	0.820593	-0.208563
EFHD2	0.681598	-0.208989
GIPC1	0.531992	-0.212673
SLC1A5	0.884226	-0.215652
RTCB	0.584795	-0.216255
AIP	0.682386	-0.216653
CLYBL	0.816909	-0.216667
SKP1	0.649757	-0.217906
SBDS	0.51898	-0.21947
PRPS2	0.808294	-0.221391
PITPNA	0.596332	-0.222562
G3BP2	0.827795	-0.223378
ADSSL1	0.515627	-0.22495
UBE2K	0.656296	-0.226854
MRRF	0.825781	-0.227053
TCEAL3	0.665658	-0.227605
PLBD2	0.707188	-0.230423
CRISPLD1	0.857732	-0.230799
NT5C2	0.805931	-0.231321
GYG1	0.828783	-0.236474
VAV2	0.775545	-0.236968
EIF3K	0.725696	-0.237357
RAD23B	0.20208	-0.237716
LMCD1	0.816121	-0.241035
PYCR3	0.707662	-0.244336
GUK1	0.456776	-0.245204
XDH	0.753434	-0.247024
NIT1	0.399648	-0.24825
THRAP3	0.821622	-0.248304
PCCB	0.727862	-0.249259
RPA1	0.789503	-0.24949
WDR5	0.164132	-0.250156
RTRAF	0.551902	-0.252746
CDC73	0.697223	-0.257081
NDE1	0.784869	-0.258792
LAMTOR3	0.887941	-0.260081
AP2B1	0.563217	-0.262886
NANP	0.740058	-0.263688
MYH9	0.58768	-0.264839
PFKP	0.613311	-0.268035
ARL6IP5	0.806427	-0.268941
BLVRB	0.605636	-0.268976
CPD	0.737327	-0.269922
DYNC1I2	0.517386	-0.272758
ACAT1	0.684053	-0.273358
LGALS1	0.821611	-0.276654
MANF	0.720056	-0.278669
DARS	0.634806	-0.278879
ITGB8	0.542068	-0.280632
ADD1	0.656788	-0.280814
LPP	0.836393	-0.282928
FAM50A	0.625096	-0.284783
LDHA	0.49109	-0.286893
EML2	0.41052	-0.288076
HNRNPK	0.710142	-0.290831
DNAJC13	0.629002	-0.29341
PRKAG1	0.552887	-0.300533
NMNAT1	0.616821	-0.303981
NPC2	0.891856	-0.304801
SELENBP1	0.784824	-0.306557
VLDLR	0.697235	-0.309588
MDH2	0.537184	-0.312224
COPZ1	0.740377	-0.312368
CAT	0.485832	-0.312665
CMPK1	0.034578	-0.313825
HNRNPUL2	0.835422	-0.313857
UBLCP1	0.537589	-0.315584
CS	0.735883	-0.316476
HS6ST2	0.734211	-0.317346
ALDOA	0.132072	-0.320006
ACTB	0.663983	-0.321161
BPGM	0.418391	-0.32407
ABHD14A-ACY1	0.600771	-0.325482
PDGFRA	0.925055	-0.325835
UBE2N	0.480987	-0.3259
PKM	0.335322	-0.327114
ABCE1	0.601368	-0.327179
ALAD	0.610981	-0.328911
EEF2	0.388636	-0.332099
ACAN	0.751846	-0.334427
APIP	0.626043	-0.334628
ST3GAL1	0.651276	-0.334738
CIRBP	0.884988	-0.336919
BID	0.476969	-0.337261
ALYREF	0.537002	-0.34174
HSPE1-MOB4	0.713807	-0.344158
IDH2	0.602439	-0.344732
TYRO3	0.776767	-0.345289
SH3BGRL	0.30231	-0.345758
THSD7A	0.791781	-0.346537
RPS3	0.601614	-0.348886
PLXNB1	0.572604	-0.349987
CAP1	0.447238	-0.350269
DSC2	0.789812	-0.351081
EPM2AIP1	0.687885	-0.351392
FAM98A	0.695708	-0.351549
PCID2	0.825393	-0.35242
SPRYD4	0.538059	-0.35254
HADH	0.754347	-0.353093
PCDH20	0.752941	-0.360089
ART3	0.829951	-0.362015
DDX6	0.685588	-0.362163
RPS12	0.589965	-0.366418
RAB11B	0.632665	-0.370862
BLOC1S2	0.710884	-0.372877
DCD	0.356253	-0.373912
PSPC1	0.692006	-0.374692
LUC7L3	0.613375	-0.37757
SMOC2	0.835901	-0.379723
MSH2	0.761991	-0.379873
TAB1	0.653376	-0.380424
CD2AP	0.707475	-0.384094
PARVB	0.654951	-0.387158
ACOT1	0.655348	-0.388965
HNRNPL	0.489143	-0.389694
LNPEP	0.38749	-0.390945
STAT3	0.606518	-0.391073
STARD7	0.745118	-0.39131
EIF5A	0.183622	-0.396274
RAB5C	0.525716	-0.401247
GMPR2	0.744586	-0.401946
TXNRD1	0.328188	-0.404081
CTNNB1	0.558303	-0.406726
PICALM	0.752873	-0.407088
TIMP2	0.866459	-0.407466
DSG1	0.552347	-0.407541
FAM129B	0.363562	-0.408209
PCDHGA10	0.684668	-0.411179
COTL1	0.505461	-0.412343
PPIL3	0.236769	-0.414988
TOR1AIP1	0.600002	-0.416459
LRPAP1	0.718051	-0.417824
ACADM	0.469003	-0.418025
BCL2L13	0.44556	-0.420757
HSD17B10	0.661895	-0.422582
PCDHGC3	0.549326	-0.427481
GSTT1	0.147053	-0.428024
MEGF8	0.683356	-0.428607
NDRG1	0.489038	-0.429426
CMAS	0.475831	-0.429611
ARCN1	0.326701	-0.429927
PCYT1A	0.288229	-0.430298
PPIC	0.786356	-0.430953
STRN3	0.23764	-0.433382
NUDT9	0.738477	-0.433844
LRP1	0.599623	-0.436694
NIP7	0.663946	-0.439452
FKBP14	0.597638	-0.440974
GLRX3	0.424897	-0.441248
MANBA	0.57623	-0.445217
UBE2A	0.527941	-0.445438
ST6GAL1	0.706085	-0.446114
TXNDC12	0.599043	-0.448329
CA12	0.825165	-0.449647
ERP29	0.515876	-0.45017
NHLRC3	0.43792	-0.451189
ZNF787	0.640259	-0.451729
PSMD3	0.415626	-0.453183
CELSR1	0.476232	-0.454182
ESYT2	0.608369	-0.455053
ASPH	0.482205	-0.455933
CLIC1	0.223791	-0.456802
FERMT2	0.692821	-0.457685
RTN4	0.451318	-0.458026
TTC13	0.421107	-0.45874
UBR7	0.62784	-0.463346
FEN1	0.485765	-0.46526
NAA50	0.172764	-0.465551
PRRC1	0.403082	-0.466036
CARMIL1	0.647216	-0.466315
MMP15	0.487625	-0.466562
DKC1	0.651147	-0.467371
EIF3L	0.368265	-0.468022
CLIC4	0.394514	-0.46831
ATP6V1A	0.316744	-0.468444
INPP1	0.4093	-0.468632
G6PD	0.345671	-0.46961
PLIN3	0.447081	-0.471009
ARPC5	0.101171	-0.471045
TRIP10	0.595578	-0.471642
MTHFS	0.814914	-0.47359
NAGA	0.387672	-0.474147
GSTM3	0.455197	-0.474331
FREM2	0.562727	-0.474794
MYDGF	0.611453	-0.475204
GXYLT1	0.58375	-0.477969
PDIA6	0.473335	-0.483543
APEX1	0.129982	-0.486679
STX12	0.533766	-0.488569
SMAP1	0.0807774	-0.489324
CIAPIN1	0.157868	-0.489325
PLA2G15	0.645159	-0.492449
RPP40	0.622884	-0.492945
VAPA	0.491036	-0.493665
PRPS1	0.587676	-0.493985
MBTPS1	0.489363	-0.496297
DPYSL2	0.429564	-0.496763
PDCL3	0.648075	-0.498655
STAMBP	0.721308	-0.499572
PREPL	0.802479	-0.502257
NMI	0.267214	-0.502948
TWF1	0.355078	-0.503311
NUDT14	0.618687	-0.504346
EIF4A3	0.550297	-0.509153
RSU1	0.465508	-0.511567
ARPC2	0.168371	-0.516971
IREB2	0.610522	-0.517011
NR2C2AP	0.538163	-0.517122
DNAJA1	0.572282	-0.518264
ATP6V1B2	0.0929608	-0.520025
SNRPD3	0.850373	-0.52029
NAPA	0.420354	-0.521997
P4HB	0.50262	-0.524132
CDK2	0.426958	-0.525077
FAM98B	0.442073	-0.530083
SLC25A13	0.732931	-0.531173
CNP	0.782009	-0.53202
GPNMB	0.896808	-0.533574
NT5DC1	0.653975	-0.534172
SUGT1	0.349186	-0.536996
HTRA2	0.269844	-0.53946
HYOU1	0.190576	-0.546493
ENO2	0.604113	-0.546904
CAPN1	0.472538	-0.553113
GPC3	0.85189	-0.554455
PLOD3	0.691461	-0.55459
QPRT	0.824221	-0.557772
OVCA2	0.603826	-0.559106
DUT	0.278056	-0.559554
HS6ST1	0.607522	-0.564195
STXBP1	0.695549	-0.565943
NQO2	0.265883	-0.568228
XYLB	0.482051	-0.573645
UBE2H	0.621404	-0.582325
YKT6	0.279325	-0.586634
BUD31	0.5156	-0.589163
THOC2	0.376971	-0.58947
MPRIP	0.610085	-0.590076
NIPSNAP3A	0.542138	-0.591655
RAP2B	0.540503	-0.592026
VAMP7	0.413624	-0.592431
MMP17	0.159921	-0.59301
COL9A3	0.762021	-0.593088
ESYT1	0.376333	-0.598218
PDLIM1	0.370195	-0.600058
PDCD6	0.304109	-0.602488
ISG20	0.5645	-0.603242
EEF1E1	0.511042	-0.606895
ACTR3	0.151452	-0.60756
TNFAIP6	0.635637	-0.610275
TMOD3	0.137889	-0.611833
SEC24B	0.332689	-0.611855
EPHB2	0.483603	-0.615306
TIGAR	0.402176	-0.615472
NAE1	0.373182	-0.615887
NUDCD1	0.610676	-0.621548
CTSV	0.856684	-0.624028
NUP54	0.0727746	-0.624238
AP3M1	0.379025	-0.625056
PPT1	0.46691	-0.626086
MAPK1	0.06584	-0.626787
ASS1	0.766106	-0.627031
GABARAP	0.382647	-0.627818
SLC9A3R2	0.42233	-0.628012
CTGF	0.696128	-0.628743
PRPF4B	0.627037	-0.628939
GORASP2	0.523944	-0.629029
ARFGEF2	0.516823	-0.631352
HAGH	0.161286	-0.632239
DNAAF5	0.240628	-0.635198
NRP2	0.562218	-0.638454
CAMK2D	0.373029	-0.638626
ETFA	0.439415	-0.641585
FABP3	0.760449	-0.64567
CHMP1A	0.475043	-0.647326
PRKACA	0.168958	-0.650244
[truncated: 528 more rows]
