# Supplementary material for: Differentiated glioma cell-derived fibromodulin activates integrin-dependent Notch signaling in endothelial cells to promote tumor angiogenesis and growth
Source: eLife journal article supplement (doi:10.7554/elife.78972), 2022-06-01
Supplement: fig1-data3 [file FMOD LFQ Values GSC vs DGC.xlsx]

## Sheet: LFQ Values_FMO
MGG4_GSC	MGG6_GSC	MGG8_GSC	MGG4_DGC	MGG6_DGC	MGG8_DGC
1	1	1	5.5041	2.8932	5.3685
