# Supplementary material for: Differentiated glioma cell-derived fibromodulin activates integrin-dependent Notch signaling in endothelial cells to promote tumor angiogenesis and growth
Source: eLife journal article supplement (doi:10.7554/elife.78972), 2022-06-01
Supplement: fig1-data4 [file FMOD Array_CT VALUES.xlsx]

## Sheet: CT VALUES OF FMOD IN ARRAY
		FMOD	ATP5G
MGG4_GSC	27.166	27.1485	22.812
	27.131
MGG4_DGC	25.024	25.007	22.872
	24.99
MGG6_GSC	27.928	27.818	25.089
	27.708
MGG6_DGC	26.34	26.644	25.205
	26.948
MGG8S_GSC	26.624	26.546	25.058
	26.468
MGG8_DGC	25.468	25.5215	25.901
	25.575
	26.658
