# Supplementary material for: Differentiated glioma cell-derived fibromodulin activates integrin-dependent Notch signaling in endothelial cells to promote tumor angiogenesis and growth
Source: eLife journal article supplement (doi:10.7554/elife.78972), 2022-06-01
Supplement: fig1-data6 [file FMOD_TGM2_REAL TIME.xlsx]

## Sheet: FMOD AND TGM2 CT
	FMOD1	FMOD2	TGM1	TGM2	ATP5g1	ATP5g2	Avg FMOD	AVG TGM	Avg ATP	Nom Ct value FMOD	Nom Ct value TGM	FC FMOD	FC TGM	Log2FC FMOD	LOg2FC TGM	2^ FMOD	2^TGM
MGG8 GSC DMSO	30.1	30.4	29.3	29.67	26.4	26.43	30.25	29.485	26.415	3.835	3.07
MGG8 GSC SB431542	31.65	31.2	29.43	28.79	27.1	27.32	31.425	29.11	27.21	4.215	1.9
MGG8 DGC DMSO	27.1	27.5	26.2	25.9	25.4	25.22	27.3	26.05	25.31	1.99	0.74	-1.845	-2.33	1.845	2.33	3.59253	5.02805
MGG8 DGC SB431542	29.34	29.33	26.98	27.5	26.43	26.23	29.335	27.24	26.33	3.005	0.91	-1.21	-0.99	1.21	0.99	2.31338	1.98618
