# Supplementary material for: Differentiated glioma cell-derived fibromodulin activates integrin-dependent Notch signaling in endothelial cells to promote tumor angiogenesis and growth
Source: eLife journal article supplement (doi:10.7554/elife.78972), 2022-06-01
Supplement: fig1-data8 [file Figure 1—sourcedata1.xlsx]

## Sheet: Sheet1
NAME	GS<br> follow link to MSigDB	GS DETAILS	SIZE	ES	NES	NOM p-val	FDR q-val	FWER p-val	RANK AT MAX	LEADING EDGE
TGFB_UP.V1_UP	TGFB_UP.V1_UP	Details ...	65	-0.588312	-2.56191	0	0	0	926	tags=57%, list=19%, signal=69%
PLASARI_TGFB1_TARGETS_10HR_UP	PLASARI_TGFB1_TARGETS_10HR_UP	Details ...	59	-0.561148	-2.46803	0	0	0	818	tags=56%, list=17%, signal=66%
MCBRYAN_PUBERTAL_TGFB1_TARGETS_UP	MCBRYAN_PUBERTAL_TGFB1_TARGETS_UP	Details ...	69	-0.563599	-2.38654	0	0	0	1024	tags=54%, list=21%, signal=67%
HALLMARK_TGF_BETA_SIGNALING	HALLMARK_TGF_BETA_SIGNALING	Details ...	21	-0.656181	-2.22499	0	0.000328612	0.11	999	tags=67%, list=20%, signal=83%
VERRECCHIA_EARLY_RESPONSE_TO_TGFB1	VERRECCHIA_EARLY_RESPONSE_TO_TGFB1	Details ...	28	-0.625641	-2.21558	0	0.000338339	0.11	753	tags=57%, list=15%, signal=67%
WP_TGFBETA_RECEPTOR_SIGNALLING_IN_SKELETAL_DYSPLASIAS	WP_TGFBETA_RECEPTOR_SIGNALLING_IN_SKELETAL_DYSPLASIAS	Details ...	16	-0.720709	-2.2098	0	0.000379754	0.13	591	tags=75%, list=12%, signal=85%
COULOUARN_TEMPORAL_TGFB1_SIGNATURE_UP	COULOUARN_TEMPORAL_TGFB1_SIGNATURE_UP	Details ...	34	-0.566629	-2.09162	0	0.00156122	0.59	1231	tags=65%, list=25%, signal=86%
REACTOME_SIGNALING_BY_TGFB_FAMILY_MEMBERS	REACTOME_SIGNALING_BY_TGFB_FAMILY_MEMBERS	Details ...	27	-0.626969	-2.06332	0	0.00228888	0.78	999	tags=56%, list=20%, signal=69%
KEGG_TGF_BETA_SIGNALING_PATHWAY	KEGG_TGF_BETA_SIGNALING_PATHWAY	Details ...	24	-0.547166	-1.94041	0	0.00708743	1	648	tags=50%, list=13%, signal=57%
WP_TGFBETA_RECEPTOR_SIGNALING	WP_TGFBETA_RECEPTOR_SIGNALING	Details ...	15	-0.70811	-1.93015	0	0.00778804	1	591	tags=73%, list=12%, signal=83%
VERRECCHIA_DELAYED_RESPONSE_TO_TGFB1	VERRECCHIA_DELAYED_RESPONSE_TO_TGFB1	Details ...	17	-0.65899	-1.90083	0	0.0101421	1	608	tags=47%, list=12%, signal=54%

## Sheet: TGFBETA_GbmNormal_Datasets
TGF Beta signaling pathway gene sets#	Gill&		Graveendeel&		Grzmil&		TCGA_affymetrix&		TCGA_agilent&		TCGA_RNA Seq&
	NES*	p-value%	NES*	p-value%	NES*	p-value%	NES*	p-value%	NES*	p-value%	NES*	p-value%
COULOUARN_TEMPORAL_TGFB1_SIGNATURE_UP	1.53126	0.0168776	1.86181	0	1.19511	0.249153	2.05365	0	1.95196	0	1.61226	0.0111111
HALLMARK_TGF_BETA_SIGNALING	2.10496	0	1.91283	0.00498753	NA	NA	1.82091	0.0164948	1.68842	0.0078125	1.71643	0.0154799
KEGG_TGF_BETA_SIGNALING_PATHWAY	1.45872	0.0416667	1.9392	0.010101	1.3586	0.12963	1.80125	0.00829876	1.61865	0.0245902	1.15607	0.226562
MCBRYAN_PUBERTAL_TGFB1_TARGETS_UP	2.65542	0	2.58021	0	2.08973	0	2.62774	0	2.62818	0	2.52399	0
PLASARI_TGFB1_TARGETS_10HR_UP	1.77779	0	1.97178	0	1.90071	0.00318471	0.974046	0.526998	1.4186	0.0326797	1.15244	0.178744
REACTOME_SIGNALING_BY_TGFB_FAMILY_MEMBERS	1.16258	0.262009	1.59009	0.0228426	NA	NA	1.57363	0.0357143	1.33499	0.116732	0.760803	0.853659
TGFB_UP.V1_UP	1.61067	0.00561798	1.55936	0.00524934	0.794754	0.75082	0.864963	0.70276	-0.57	0.974	1.03894	0.396135
VERRECCHIA_DELAYED_RESPONSE_TO_TGFB1	2.55049	0	1.75637	0.0220049	NA	NA	1.959	0.00409836	2.19034	0	2.26622	0
VERRECCHIA_EARLY_RESPONSE_TO_TGFB1	3.06271	0	3.11211	0	NA	NA	3.08459	0	2.85284	0	2.68735	0
WP_TGFBETA_RECEPTOR_SIGNALING	1.94074	0.00722022	1.85295	0.0145985	NA	NA	1.76214	0.0140562	1.8984	0.0075188	1.34891	0.091195
WP_TGFBETA_RECEPTOR_SIGNALLING_IN_SKELETAL_DYSPLASIAS	1.87304	0.003861	1.82862	0.00243309	NA	NA	1.8784	0.00584795	1.91517	0	1.27157	0.151515
																	Significance
																	% -p-val < 0.05 considered significant
																	NA = Not available
															*-Postive NES score
															1
															2
															3
															4
																					& -Datasets used
																					Gill-GSE
																					Graveendeel-GSE
																					Grazmil-GSE
																					TCGA_affymetrix-GSE
																					TCGA_agilent-GSE
																					TCGA_rnaseq-GSE
