# Supplementary material for: Differentiated glioma cell-derived fibromodulin activates integrin-dependent Notch signaling in endothelial cells to promote tumor angiogenesis and growth
Source: eLife journal article supplement (doi:10.7554/elife.78972), 2022-06-01
Supplement: fig1-data10 [file Figure 1—sourcedata3.xlsx]

## Sheet: GSE54791
Supplemenatary Figure X. Enrichment of mesenchymal gene expression signature and TGF beta signaling pathway in GSCs
Gene expression sub type# or signaling pathway$	Glioma stem-like cells (GSCs)&									Differentiated glioma cells (DGCs)&
	MGG4_GSC_1	MGG4_GSC_2	MGG4_GSC_3	MGG6_GSC_1	MGG6_GSC_2	MGG6_GSC_3	MGG8_GSC_1	MGG8_GSC_2	MGG8_GSC_3	MGG4_DGC_1	MGG4_DGC_2	MGG4_DGC_3	MGG6_DGC_1	MGG6_DGC_2	MGG6_DGC_3	MGG8_DGC_1	MGG8_DGC_2	MGG8_DGC_3
VERHAAK_GLIOBLASTOMA_CLASSICAL	-0.208921	-0.252535	-0.29784	0.170311	0.144547	0.19333	-0.230348	-0.0632387	-0.270897	-0.137627	-0.0243288	-0.0847212	0.0993219	-0.0888977	-0.109736	-0.099832	-0.196219	-0.128296
VERHAAK_GLIOBLASTOMA_MESENCHYMAL	-0.472893	-0.448758	-0.470246	-0.465919	-0.392749	-0.467576	-0.496116	-0.451339	-0.493919	0.322012	0.312138	0.332578	0.389725	0.352265	0.283731	0.240644	0.225158	0.176722
VERHAAK_GLIOBLASTOMA_NEURAL	-0.0220649	0.0836601	0.0883716	-0.167963	-0.0566447	-0.276589	0.0348075	-0.276216	-0.0328028	0.0721409	0.0644613	0.0888856	0.0777727	0.0265781	-0.0973225	0.000105159	0.0744519	0.10615
VERHAAK_GLIOBLASTOMA_PRONEURAL	0.115728	0.103662	0.146264	0.222271	0.189932	0.150905	0.256509	0.0380392	0.320026	-0.309022	-0.360942	-0.380377	-0.406655	-0.327706	-0.455831	-0.345667	-0.207103	-0.236082
HALLMARK_TGF_BETA_SIGNALING$	-0.332969	-0.275886	-0.218369	-0.28381	-0.420048	-0.306652	-0.474803	-0.336265	-0.53682	0.0813722	-0.0188777	0.00640406	0.193626	0.182395	0.31087	0.29372	0.26716	0.298299
#- Verhaak RG, Hoadley KA, Purdom E, Wang V, Qi Y, Wilkerson MD, Miller CR, Ding L, Golub T, Mesirov JP, et al. Integrated genomic analysis identifies clinically relevant subtypes of glioblastoma characterized by abnormalities in PDGFRA, IDH1, EGFR, and NF1. Cancer Cell. 2010;17:98–110.
$- HALLMARK_TGF_BETA_SIGNALING gene set from the Hallmark gene sets of the Molecular Signatures Database (MSigDB), containing genes up-regulated in response to TGFB1
& - Suva, M. L., E. Rheinbay, S. M. Gillespie, A. P. Patel, H. Wakimoto, et.al. Reconstructing and reprogramming the tumor-propagating potential of glioblastoma stem-like cells. Cell.2014;157:580-94.

## Sheet: GSE119834
Supplemenatary Table X. Enrichment of mesenchymal gene expression sub type and TGF beta signaling in GBMs
	Glioma stem-like cells (GSCs)^																																												Glioblastoma (GBM)@
Gene expression sub type# or signaling pathway$	GSC34	GSC2	GSC35	GSC39	GSC24	GSC20	GSC36	GSC30	GSC21	GSC29	GSC37	GSC13	GSC1	GSC38	GSC3	GSC17	GSC12	GSC4	GSC5	GSC31	GSC15	GSC28	GSC27	GSC23	GSC7	GSC26	GSC32	GSC16	GSC6	GSC18	GSC8	GSC40	GSC41	GSC33	GSC9	GSC42	GSC10	GSC14	GSC43	GSC19	GSC44	GSC25	GSC22	GSC11	GBM30	GBM21	GBM46	GBM47	GBM48
VERHAAK_GLIOBLASTOMA_CLASSICAL	0.340006	0.436624	-0.205379	0.380422	0.0742738	0.0891305	-0.457605	-0.352651	-0.188964	-0.150833	-0.0895319	0.325936	0.20832	-0.460996	0.1321	-0.486941	0.135389	-0.0654694	0.201681	0.131924	-0.139344	0.258412	0.0260274	-0.312472	0.329898	0.22016	-0.416545	-0.155308	0.0608683	-0.387755	0.471078	-0.358037	-0.219835	-0.382948	0.0304732	-0.260611	-0.423889	-0.11315	0.117278	-0.275189	-0.498165	0.0659476	-0.310076	0.154779	-0.472327	-0.355613	-0.487513	-0.46738	-0.39179
VERHAAK_GLIOBLASTOMA_MESENCHYMAL	-0.291664	-0.589791	0.394483	-0.559224	-0.2338	-0.0409016	-0.618479	-0.117116	0.0689457	-0.35207	-0.0609033	-0.529553	-0.53447	-0.414652	-0.648245	0.185948	-0.457293	-0.668153	-0.49681	0.410226	-0.321268	-0.545653	-0.407077	0.173056	-0.66233	-0.386318	-0.517689	0.156103	-0.508274	0.0136627	-0.544024	-0.0293435	0.368873	-0.232966	-0.622115	-0.618608	-0.619189	-0.445027	-0.580265	0.156006	-0.334293	-0.0153911	0.17942	-0.652113	0.48211	0.535212	0.416034	-0.137708	-0.293539
VERHAAK_GLIOBLASTOMA_NEURAL	-0.346172	-0.269713	-0.12036	-0.553196	-0.196351	-0.187197	-0.0102801	0.177341	-0.0715884	-0.400641	-0.408881	-0.354244	-0.271869	-0.267252	-0.457441	0.106225	-0.256645	-0.230936	-0.156004	0.152973	-0.375583	0.193505	-0.287175	-0.28752	-0.411045	-0.258341	-0.0799761	-0.237812	-0.159429	-0.164973	-0.466457	-0.238485	-0.268299	-0.437714	-0.322479	-0.310712	-0.273974	-0.32227	-0.25094	-0.237732	-0.00444725	-0.453419	-0.370872	-0.35524	-0.0366144	0.0510898	0.293467	0.589491	0.603604
VERHAAK_GLIOBLASTOMA_PRONEURAL	-0.33796	0.165802	-0.591404	-0.0899537	-0.371731	-0.33728	0.359273	-0.265257	-0.398213	-0.340937	-0.419318	-0.00423671	-0.0646543	-0.353594	0.383732	-0.539956	-0.157955	0.572463	0.048331	-0.25305	-0.263715	0.0512554	-0.289164	-0.544869	0.350272	-0.37504	0.315433	-0.468373	-0.0089843	-0.584437	-0.0538044	-0.487188	-0.560987	-0.425708	0.106515	0.128432	0.31303	-0.087033	0.23172	-0.478464	-0.191883	-0.319391	-0.453134	0.262722	-0.509312	-0.539554	-0.0301179	0.159142	0.195254
HALLMARK_TGF_BETA_SIGNALING	-0.162059	-0.245713	0.260108	-0.357263	0.0241501	0.0168602	-0.449533	-0.119635	0.286267	-0.256786	0.24291	-0.245385	-0.125304	-0.185785	-0.20833	0.0848419	-0.400041	-0.333467	-0.150635	0.0191559	-0.257606	-0.269299	-0.340209	-0.0946756	-0.197316	-0.288468	-0.367005	0.137531	-0.23296	-0.181563	-0.062006	-0.201955	0.170957	-0.394068	-0.414029	-0.195682	-0.395804	-0.21219	-0.199017	0.12072	-0.331351	-0.00348866	0.186515	-0.216268	0.116272	0.268822	0.0361075	-0.260841	-0.272097
FMOD EXPRESSION
# Verhaak RG, Hoadley KA, Purdom E, Wang V, Qi Y, Wilkerson MD, Miller CR, Ding L, Golub T, Mesirov JP, et al. Integrated genomic analysis identifies clinically relevant subtypes of glioblastoma characterized by abnormalities in PDGFRA, IDH1, EGFR, and NF1. Cancer Cell. 2010;17:98–110.
$ HALLMARK_TGF_BETA_SIGNALING gene set from the Hallmark gene sets of the Molecular Signatures Database (MSigDB), containing genes up-regulated in response to TGFB1
^ Mack SC, Singh I, Wang X, Hirsch R, et.al., Chromatin landscapes reveal developmentally encoded transcriptional states that define human glioblastoma. J Exp Med. 2019;216(5):1071-1090.
[truncated: 40 more columns]

## Sheet: plot
pathway	TYPES	VERHAAK_GLIOBLASTOMA_CLASSICAL	VERHAAK_GLIOBLASTOMA_MESENCHYMAL	VERHAAK_GLIOBLASTOMA_NEURAL	VERHAAK_GLIOBLASTOMA_PRONEURAL	HALLMARK_TGF_BETA_SIGNALING
MGG4_TPC_1	TPC	-0.208921	-0.472893	-0.0220649	0.115728	-0.332969
MGG4_TPC_2	TPC	-0.252535	-0.448758	0.0836601	0.103662	-0.275886
MGG4_TPC_3	TPC	-0.29784	-0.470246	0.0883716	0.146264	-0.218369
MGG6_TPC_1	TPC	0.170311	-0.465919	-0.167963	0.222271	-0.28381
MGG6_TPC_2	TPC	0.144547	-0.392749	-0.0566447	0.189932	-0.420048
MGG6_TPC_3	TPC	0.19333	-0.467576	-0.276589	0.150905	-0.306652
MGG8_TPC_1	TPC	-0.230348	-0.496116	0.0348075	0.256509	-0.474803
MGG8_TPC_2	TPC	-0.0632387	-0.451339	-0.276216	0.0380392	-0.336265
MGG8_TPC_3	TPC	-0.270897	-0.493919	-0.0328028	0.320026	-0.53682
MGG4_DGC_1	DGC	-0.137627	0.322012	0.0721409	-0.309022	0.0813722
MGG4_DGC_2	DGC	-0.0243288	0.312138	0.0644613	-0.360942	-0.0188777
MGG4_DGC_3	DGC	-0.0847212	0.332578	0.0888856	-0.380377	0.00640406
MGG6_DGC_1	DGC	0.0993219	0.389725	0.0777727	-0.406655	0.193626
MGG6_DGC_2	DGC	-0.0888977	0.352265	0.0265781	-0.327706	0.182395
MGG6_DGC_3	DGC	-0.109736	0.283731	-0.0973225	-0.455831	0.31087
MGG8_DGC_1	DGC	-0.099832	0.240644	0.000105159	-0.345667	0.29372
MGG8_DGC_2	DGC	-0.196219	0.225158	0.0744519	-0.207103	0.26716
MGG8_DGC_3	DGC	-0.128296	0.176722	0.10615	-0.236082	0.298299

## Sheet: HEATMAP
pathway	MGG4_TPC_1	MGG4_TPC_2	MGG4_TPC_3	MGG6_TPC_1	MGG6_TPC_2	MGG6_TPC_3	MGG8_TPC_1	MGG8_TPC_2	MGG8_TPC_3	MGG4_DGC_1	MGG4_DGC_2	MGG4_DGC_3	MGG6_DGC_1	MGG6_DGC_2	MGG6_DGC_3	MGG8_DGC_1	MGG8_DGC_2	MGG8_DGC_3
VERHAAK_GLIOBLASTOMA_CLASSICAL	-0.208921	-0.252535	-0.29784	0.170311	0.144547	0.19333	-0.230348	-0.0632387	-0.270897	-0.137627	-0.0243288	-0.0847212	0.0993219	-0.0888977	-0.109736	-0.099832	-0.196219	-0.128296
VERHAAK_GLIOBLASTOMA_MESENCHYMAL	-0.472893	-0.448758	-0.470246	-0.465919	-0.392749	-0.467576	-0.496116	-0.451339	-0.493919	0.322012	0.312138	0.332578	0.389725	0.352265	0.283731	0.240644	0.225158	0.176722
VERHAAK_GLIOBLASTOMA_NEURAL	-0.0220649	0.0836601	0.0883716	-0.167963	-0.0566447	-0.276589	0.0348075	-0.276216	-0.0328028	0.0721409	0.0644613	0.0888856	0.0777727	0.0265781	-0.0973225	0.000105159	0.0744519	0.10615
VERHAAK_GLIOBLASTOMA_PRONEURAL	0.115728	0.103662	0.146264	0.222271	0.189932	0.150905	0.256509	0.0380392	0.320026	-0.309022	-0.360942	-0.380377	-0.406655	-0.327706	-0.455831	-0.345667	-0.207103	-0.236082
HALLMARK_TGF_BETA_SIGNALING	-0.332969	-0.275886	-0.218369	-0.28381	-0.420048	-0.306652	-0.474803	-0.336265	-0.53682	0.0813722	-0.0188777	0.00640406	0.193626	0.182395	0.31087	0.29372	0.26716	0.298299

## Sheet: anno
pathway	TYPES
MGG4_TPC_1	TPC
MGG4_TPC_2	TPC
MGG4_TPC_3	TPC
MGG6_TPC_1	TPC
MGG6_TPC_2	TPC
MGG6_TPC_3	TPC
MGG8_TPC_1	TPC
MGG8_TPC_2	TPC
MGG8_TPC_3	TPC
MGG4_DGC_1	DGC
MGG4_DGC_2	DGC
MGG4_DGC_3	DGC
MGG6_DGC_1	DGC
MGG6_DGC_2	DGC
MGG6_DGC_3	DGC
MGG8_DGC_1	DGC
MGG8_DGC_2	DGC
MGG8_DGC_3	DGC

## Sheet: heatmpa_2
pathway	GSC34	GSC2	GSC35	GSC39	GSC24	GSC20	GSC36	GSC30	GSC21	GSC29	GSC37	GSC13	GSC1	GSC38	GSC3	GSC17	GSC12	GSC4	GSC5	GSC31	GSC15	GSC28	GSC27	GSC23	GSC7	GSC26	GSC32	GSC16	GSC6	GSC18	GSC8	GSC40	GSC41	GSC33	GSC9	GSC42	GSC10	GSC14	GSC43	GSC19	GSC44	GSC25	GSC22	GSC11	GBM30	GBM21	GBM46	GBM47	GBM48
VERHAAK_GLIOBLASTOMA_CLASSICAL	0.340006	0.436624	-0.205379	0.380422	0.0742738	0.0891305	-0.457605	-0.352651	-0.188964	-0.150833	-0.0895319	0.325936	0.20832	-0.460996	0.1321	-0.486941	0.135389	-0.0654694	0.201681	0.131924	-0.139344	0.258412	0.0260274	-0.312472	0.329898	0.22016	-0.416545	-0.155308	0.0608683	-0.387755	0.471078	-0.358037	-0.219835	-0.382948	0.0304732	-0.260611	-0.423889	-0.11315	0.117278	-0.275189	-0.498165	0.0659476	-0.310076	0.154779	-0.472327	-0.355613	-0.487513	-0.46738	-0.39179
VERHAAK_GLIOBLASTOMA_MESENCHYMAL	-0.291664	-0.589791	0.394483	-0.559224	-0.2338	-0.0409016	-0.618479	-0.117116	0.0689457	-0.35207	-0.0609033	-0.529553	-0.53447	-0.414652	-0.648245	0.185948	-0.457293	-0.668153	-0.49681	0.410226	-0.321268	-0.545653	-0.407077	0.173056	-0.66233	-0.386318	-0.517689	0.156103	-0.508274	0.0136627	-0.544024	-0.0293435	0.368873	-0.232966	-0.622115	-0.618608	-0.619189	-0.445027	-0.580265	0.156006	-0.334293	-0.0153911	0.17942	-0.652113	0.48211	0.535212	0.416034	-0.137708	-0.293539
VERHAAK_GLIOBLASTOMA_NEURAL	-0.346172	-0.269713	-0.12036	-0.553196	-0.196351	-0.187197	-0.0102801	0.177341	-0.0715884	-0.400641	-0.408881	-0.354244	-0.271869	-0.267252	-0.457441	0.106225	-0.256645	-0.230936	-0.156004	0.152973	-0.375583	0.193505	-0.287175	-0.28752	-0.411045	-0.258341	-0.0799761	-0.237812	-0.159429	-0.164973	-0.466457	-0.238485	-0.268299	-0.437714	-0.322479	-0.310712	-0.273974	-0.32227	-0.25094	-0.237732	-0.00444725	-0.453419	-0.370872	-0.35524	-0.0366144	0.0510898	0.293467	0.589491	0.603604
VERHAAK_GLIOBLASTOMA_PRONEURAL	-0.33796	0.165802	-0.591404	-0.0899537	-0.371731	-0.33728	0.359273	-0.265257	-0.398213	-0.340937	-0.419318	-0.00423671	-0.0646543	-0.353594	0.383732	-0.539956	-0.157955	0.572463	0.048331	-0.25305	-0.263715	0.0512554	-0.289164	-0.544869	0.350272	-0.37504	0.315433	-0.468373	-0.0089843	-0.584437	-0.0538044	-0.487188	-0.560987	-0.425708	0.106515	0.128432	0.31303	-0.087033	0.23172	-0.478464	-0.191883	-0.319391	-0.453134	0.262722	-0.509312	-0.539554	-0.0301179	0.159142	0.195254
HALLMARK_TGF_BETA_SIGNALING	-0.162059	-0.245713	0.260108	-0.357263	0.0241501	0.0168602	-0.449533	-0.119635	0.286267	-0.256786	0.24291	-0.245385	-0.125304	-0.185785	-0.20833	0.0848419	-0.400041	-0.333467	-0.150635	0.0191559	-0.257606	-0.269299	-0.340209	-0.0946756	-0.197316	-0.288468	-0.367005	0.137531	-0.23296	-0.181563	-0.062006	-0.201955	0.170957	-0.394068	-0.414029	-0.195682	-0.395804	-0.21219	-0.199017	0.12072	-0.331351	-0.00348866	0.186515	-0.216268	0.116272	0.268822	0.0361075	-0.260841	-0.272097
[truncated: 40 more columns]

## Sheet: anno_2
pathway	TYPES
GSC34	GSC
GSC2	GSC
GSC35	GSC
GSC39	GSC
GSC24	GSC
GSC20	GSC
GSC36	GSC
GSC30	GSC
GSC21	GSC
GSC29	GSC
GSC37	GSC
GSC13	GSC
GSC1	GSC
GSC38	GSC
GSC3	GSC
GSC17	GSC
GSC12	GSC
GSC4	GSC
GSC5	GSC
GSC31	GSC
GSC15	GSC
GSC28	GSC
GSC27	GSC
GSC23	GSC
GSC7	GSC
GSC26	GSC
GSC32	GSC
GSC16	GSC
GSC6	GSC
GSC18	GSC
GSC8	GSC
GSC40	GSC
GSC41	GSC
GSC33	GSC
GSC9	GSC
GSC42	GSC
GSC10	GSC
GSC14	GSC
GSC43	GSC
GSC19	GSC
GSC44	GSC
GSC25	GSC
GSC22	GSC
GSC11	GSC
GBM30	GBM
GBM21	GBM
GBM46	GBM
GBM47	GBM
GBM48	GBM
GBM49	GBM
GBM82	GBM
GBM50	GBM
GBM51	GBM
GBM52	GBM
GBM53	GBM
GBM54	GBM
GBM55	GBM
GBM1	GBM
GBM56	GBM
GBM57	GBM
GBM58	GBM
GBM59	GBM
GBM17	GBM
GBM61	GBM
GBM62	GBM
GBM63	GBM
GBM4	GBM
GBM64	GBM
GBM65	GBM
GBM5	GBM
GBM67	GBM
GBM31	GBM
GBM69	GBM
GBM70	GBM
GBM71	GBM
GBM72	GBM
GBM73	GBM
GBM83	GBM
GBM84	GBM
GBM74	GBM
GBM76	GBM
GBM77	GBM
GBM28	GBM
GBM78	GBM
GBM79	GBM
GBM32	GBM
GBM80	GBM
GBM33	GBM
GBM81	GBM
