# Supplementary material for: Differentiated glioma cell-derived fibromodulin activates integrin-dependent Notch signaling in endothelial cells to promote tumor angiogenesis and growth
Source: eLife journal article supplement (doi:10.7554/elife.78972), 2022-06-01
Supplement: fig1-data11 [file GSC VS DGC RNA SEQ DATA.xlsx]

## Sheet: Sheet1
Genename	p-value	adj. p (Benjamini/Hochberg)	AvgGSC	AvgDGC	Log2Diff(GSC-DGC)	Regulation
OLIG1	0.000348575	0.00411988	206.553	0.76911	8.0691	Up
RFX4	0.00267396	0.0139914	5.52136	0.0217901	7.98521	Up				Sample_Id	Sample_rep	type
COL20A1	0.000338837	0.00411988	161.37	0.660508	7.93258	Up				MGG4	MGG4_GSC_1	GSC
TMEM88B	0.000574706	0.00557175	5.63461	0.023236	7.92181	Up					MGG4_GSC_2	GSC
GRIK3	0.000269869	0.00411988	30.4228	0.133829	7.82862	Up					MGG4_GSC_3	GSC
ASTN1	0.00420386	0.0183722	5.07728	0.023236	7.77155	Up				MGG6	MGG6_GSC_1	GSC
S100B	0.000348575	0.00411988	1447.65	7.01722	7.6886	Up					MGG6_GSC_2	GSC
KCNJ10	0.000229348	0.00411988	24.5429	0.119437	7.68291	Up					MGG6_GSC_3	GSC
PTPRZ1	0.000348575	0.00411988	672.795	3.45775	7.60419	Up				MGG8	MGG8_GSC_1	GSC
BCAN	0.000301829	0.00411988	47.5191	0.247297	7.58612	Up					MGG8_GSC_2	GSC
KLHDC8A	0.000348575	0.00411988	399.666	2.0818	7.58482	Up					MGG8_GSC_3	GSC
NCAN	0.000348575	0.00411988	250.925	1.38473	7.5015	Up				MGG4	MGG4_DGC_1	DGC
ASCL1	0.000301829	0.00411988	39.1694	0.218917	7.4832	Up					MGG4_DGC_2	DGC
OLIG2	0.000348575	0.00411988	152.492	0.855135	7.47837	Up					MGG4_DGC_3	DGC
DNAH9	0.000269869	0.00411988	19.7914	0.112442	7.45955	Up				MGG6	MGG6_DGC_1	DGC
CDHR1	0.00230759	0.0121416	7.46625	0.0450261	7.37348	Up					MGG6_DGC_2	DGC
DLK1	0.0165499	0.0496467	105.604	0.642285	7.36123	Up					MGG6_DGC_3	DGC
CHRM1	0.000182481	0.00411988	9.35892	0.0603887	7.27592	Up				MGG8	MGG8_DGC_1	DGC
LGI2	0.000338837	0.00411988	123.819	0.814591	7.24794	Up					MGG8_DGC_2	DGC
SCN1A	0.00230759	0.0121416	8.87948	0.0589271	7.2354	Up					MGG8_DGC_3	DGC
NTRK2	0.00952417	0.0327842	18.8534	0.125743	7.2282	Up
FREM2	0.000229348	0.00411988	21.0332	0.140731	7.22358	Up
ATP1A2	0.000346122	0.00411988	57.5182	0.401314	7.16314	Up
C1orf61	0.000348575	0.00411988	626.218	4.53366	7.10985	Up
CHADL	0.000348575	0.00411988	47.1442	0.341949	7.10715	Up
TTYH1	0.000348575	0.00411988	300.31	2.23233	7.07176	Up
PMP2	0.000348575	0.00411988	313.836	2.35205	7.05995	Up
IGSF11	0.000301829	0.00411988	22.697	0.170457	7.05695	Up
SOX3	0.0133838	0.0429018	16.4782	0.125973	7.0313	Up
VGF	0.000348575	0.00411988	429.007	3.34114	7.00452	Up
FAM181B	0.000348575	0.00411988	154.132	1.22459	6.97573	Up
LOC100127888	0.000269869	0.00411988	33.4875	0.273487	6.93601	Up
FAM95B1	0.000348575	0.00411988	42.7157	0.369801	6.85187	Up
TBX21	0.000269869	0.00411988	9.83981	0.086997	6.82152	Up
MIR9-1	0.0159218	0.0478444	11.5512	0.107691	6.745	Up
MYT1	0.0071755	0.0266313	3.77834	0.035691	6.72605	Up
INSM1	0.000346122	0.00411988	133.812	1.26585	6.72395	Up
RLBP1	0.000269869	0.00411988	21.2656	0.202028	6.71783	Up
ITIH6	0.00191583	0.011171	14.0026	0.143053	6.61299	Up
ACSS1	0.000338837	0.00411988	74.6601	0.764256	6.61014	Up
RNF165	0.000182481	0.00411988	3.45858	0.035691	6.59848	Up
SOX8	0.000348575	0.00411988	100.054	1.03729	6.59181	Up
NKAIN4	0.0015371	0.00994131	18.1046	0.191075	6.56607	Up
CPXM1	0.000348575	0.00411988	110.398	1.21516	6.50543	Up
CMTM5	0.00045477	0.00479912	31.9732	0.353617	6.49853	Up
ATP1B2	0.000348575	0.00411988	142.881	1.66975	6.41904	Up
LPPR5	0.000338837	0.00411988	21.1306	0.251638	6.39184	Up
RAP1GAP	0.000301829	0.00411988	19.4218	0.232141	6.38653	Up
FABP7	0.000348575	0.00411988	413.101	5.16312	6.32211	Up
C1orf94	0.0110555	0.0379229	10.6734	0.13376	6.31823	Up
DPYSL5	0.000324598	0.00411988	55.6829	0.708889	6.29553	Up
SLIT1	0.00552726	0.0220852	21.6893	0.283832	6.2558	Up
WSCD1	0.000338837	0.00411988	56.3856	0.749117	6.23399	Up
BAI1	0.000348575	0.00411988	153.58	2.05619	6.22287	Up
APOC4-APOC2	0.00845504	0.0312698	7.7103	0.103566	6.21817	Up
COBL	0.000324598	0.00411988	27.1879	0.36542	6.21726	Up
COL9A3	0.000348575	0.00411988	549.287	7.66297	6.16351	Up
GAS7	0.000348575	0.00411988	123.095	1.71987	6.16133	Up
PLP1	0.000346122	0.00411988	95.393	1.34318	6.15016	Up
LOC389023	0.00363499	0.0172602	7.73051	0.109062	6.14734	Up
GPM6B	0.000348575	0.00411988	150.372	2.28114	6.04264	Up
MAGEA12	0.00608411	0.0242671	13.1584	0.201872	6.0264	Up
FUT9	0.000229348	0.00411988	3.84712	0.0592361	6.02116	Up
BARX1	0.0026661	0.0139642	31.3516	0.483489	6.01891	Up
SCG3	0.000324598	0.00411988	11.9936	0.186038	6.01052	Up
NAT8L	0.000346122	0.00411988	32.8108	0.514693	5.99431	Up
BMP7	0.000348575	0.00411988	142.198	2.27287	5.96724	Up
SOX21	0.000338837	0.00411988	18.9444	0.305031	5.95667	Up
NKAIN1	0.000324598	0.00411988	33.8986	0.549909	5.94589	Up
DCX	0.00339918	0.0162089	16.527	0.295055	5.8077	Up
LOC90499	0.000301829	0.00411988	14.9522	0.269046	5.79636	Up
MT3	0.0118489	0.0381369	303.979	5.76063	5.7216	Up
UGT8	0.0109908	0.037709	20.4623	0.388484	5.71897	Up
TOX3	0.00045477	0.00479912	14.4164	0.278163	5.69563	Up
RIMS4	0.000338837	0.00411988	9.20593	0.178417	5.68924	Up
HEY2	0.000338837	0.00411988	18.5535	0.362513	5.67751	Up
ACTN2	0.00191583	0.011171	5.02607	0.0984565	5.6738	Up
NDRG2	0.000348575	0.00411988	83.1467	1.63276	5.67027	Up
MIA	0.0118489	0.0381369	276.48	5.59473	5.62696	Up
MAP2	0.000348575	0.00411988	271.181	5.57565	5.60397	Up
PCDH17	0.000324598	0.00411988	37.2443	0.772382	5.59156	Up
KIF1A	0.000674763	0.00557175	28.5674	0.595228	5.58478	Up
CPLX1	0.000928533	0.00675394	26.4192	0.550786	5.58395	Up
LAMP5	0.00695917	0.026283	36.8953	0.771292	5.58002	Up
KIAA0226L	0.00845504	0.0312698	6.01548	0.126052	5.57659	Up
ATP10B	0.0143436	0.0456356	5.93746	0.125743	5.56129	Up
COL9A1	0.00538664	0.0216298	19.2799	0.412826	5.54542	Up
AZGP1	0.00230372	0.0121416	39.6975	0.869492	5.51273	Up
SOX2	0.000348575	0.00411988	225.689	4.96113	5.50753	Up
RNF157	0.000348575	0.00411988	74.1375	1.64795	5.49146	Up
SEZ6	0.015117	0.0456356	36.828	0.821026	5.48723	Up
AIF1L	0.000348575	0.00411988	253.266	5.64718	5.48698	Up
PODXL2	0.000346122	0.00411988	52.0125	1.16637	5.47877	Up
MCHR1	0.00363499	0.0172602	4.28343	0.0964574	5.47273	Up
LRRC4	0.000324598	0.00411988	12.8981	0.30002	5.42596	Up
CNTFR	0.000346122	0.00411988	40.1298	0.94449	5.40899	Up
FOSB	0.000348575	0.00411988	168.848	3.97976	5.4069	Up
SLC24A3	0.0126049	0.0404874	25.4663	0.602978	5.40034	Up
EYA2	0.000338837	0.00411988	34.7526	0.861977	5.33333	Up
CA14	0.000346122	0.00411988	51.5846	1.27979	5.33297	Up
NUP210	0.000348575	0.00411988	89.8392	2.28554	5.29674	Up
CAMKV	0.000229348	0.00411988	9.54587	0.24537	5.28184	Up
BRSK2	0.000338837	0.00411988	25.5515	0.657204	5.28092	Up
PLLP	0.000346122	0.00411988	26.8886	0.692035	5.28001	Up
FGFBP3	0.000348575	0.00411988	82.718	2.14872	5.26665	Up
FAM59B	0.000346122	0.00411988	24.6443	0.642476	5.26146	Up
ANKRD20A8P	0.000346122	0.00411988	41.8294	1.09446	5.25623	Up
KCNQ2	0.000348575	0.00411988	117.41	3.11502	5.23617	Up
GDAP1L1	0.000324598	0.00411988	12.081	0.322112	5.22903	Up
FREM1	0.00420386	0.0183722	1.63227	0.0435801	5.22707	Up
FOXJ1	0.000269869	0.00411988	4.96901	0.13376	5.21524	Up
CHRNB2	0.00416282	0.0182333	3.83779	0.103953	5.20627	Up
ANKRD20A4	0.000346122	0.00411988	46.7797	1.27576	5.19645	Up
RAPGEF4	0.000338837	0.00411988	11.7903	0.325264	5.17985	Up
ANKRD20A2	0.000483497	0.00479912	47.4235	1.31145	5.17637	Up
ANKRD20A3	0.000346122	0.00411988	47.3069	1.31145	5.17282	Up
MTSS1	0.000346122	0.00411988	74.4495	2.06492	5.1721	Up
LOC100506421	0.000348575	0.00411988	40.8692	1.13894	5.16525	Up
C2orf72	0.000338837	0.00411988	13.8939	0.387616	5.16367	Up
ANKRD20A1	0.000346122	0.00411988	47.9727	1.34164	5.16014	Up
SLC35F1	0.000348575	0.00411988	53.3742	1.49774	5.15528	Up
FXYD7	0.00171068	0.0100634	12.2835	0.349692	5.1345	Up
KCND3	0.00777768	0.0287984	2.33238	0.0668162	5.12546	Up
LMO3	0.0124223	0.0399334	2.05537	0.0592361	5.11678	Up
LAMC3	0.000324598	0.00411988	8.35419	0.246814	5.081	Up
SOX1	0.000346122	0.00411988	49.6732	1.47525	5.07344	Up
BMP8B	0.000348575	0.00411988	38.6635	1.15346	5.06694	Up
GPR98	0.000269869	0.00411988	4.55879	0.139875	5.02644	Up
CLMN	0.00230759	0.0121416	1.95953	0.0609164	5.00753	Up
NPW	0.000922875	0.00675394	34.1763	1.07628	4.98887	Up
GLB1L2	0.000346122	0.00411988	89.8828	2.8874	4.9602	Up
ASIC4	0.00494377	0.0214807	15.0746	0.484844	4.95845	Up
SCRG1	0.000348575	0.00411988	646.99	20.8936	4.95261	Up
NPR1	0.00416282	0.0182333	3.15196	0.102507	4.94245	Up
TEX15	0.000346122	0.00411988	11.6456	0.382809	4.92702	Up
YBX2	0.0159218	0.0478444	1.78261	0.0597103	4.89987	Up
PLEKHB1	0.000348575	0.00411988	102.124	3.43595	4.89347	Up
TMEM145	0.000346122	0.00411988	23.9433	0.810594	4.8845	Up
LHFPL3	0.000348575	0.00411988	70.0481	2.38658	4.87533	Up
VSTM2B	0.00531531	0.0216298	15.3141	0.523668	4.87007	Up
ARHGDIG	0.000301829	0.00411988	7.32737	0.253257	4.85462	Up
MLC1	0.000928533	0.00675394	361.361	12.5044	4.85294	Up
GLDC	0.000348575	0.00411988	82.7253	2.92105	4.82377	Up
SMOC1	0.0151648	0.0456356	18.829	0.672378	4.80754	Up
HRASLS	0.000338837	0.00411988	19.7045	0.705359	4.80402	Up
FAM49B	0.00172014	0.0100634	546.509	19.5678	4.80369	Up
WNK2	0.000338837	0.00411988	10.3391	0.373858	4.78947	Up
SNX10	0.000338837	0.00411988	22.9161	0.836959	4.77506	Up
POU3F3	0.000348575	0.00411988	89.7245	3.44744	4.7019	Up
PPP1R14C	0.000348575	0.00411988	147.994	5.74934	4.686	Up
TMEM229B	0.000338837	0.00411988	17.3179	0.6767	4.67761	Up
PVT1	0.000346122	0.00411988	48.0436	1.88171	4.67423	Up
TMPRSS5	0.000348575	0.00411988	22.6385	0.894256	4.66195	Up
CSPG5	0.000486766	0.00479912	142.229	5.62106	4.66123	Up
RNASE1	0.00360816	0.0171794	1.91307	0.0758569	4.65647	Up
ABLIM2	0.0117903	0.0381369	2.79286	0.11122	4.65025	Up
CRISPLD1	0.000348575	0.00411988	67.4371	2.72573	4.62883	Up
GPR56	0.000348575	0.00411988	237.415	9.72083	4.61019	Up
ARSG	0.00360816	0.0171794	2.91756	0.120915	4.5927	Up
FAM198A	0.000301829	0.00411988	10.5209	0.440871	4.57676	Up
RAMP2	0.000338837	0.00411988	16.1576	0.681601	4.56714	Up
MCF2L	0.000324598	0.00411988	10.766	0.456572	4.5595	Up
TRIL	0.000324598	0.00411988	10.0531	0.43061	4.54511	Up
FLJ32063	0.000811206	0.00668789	4.99883	0.216	4.53249	Up
OGDHL	0.000338837	0.00411988	11.8922	0.517307	4.52286	Up
HILS1	0.000324598	0.00411988	7.35426	0.320645	4.51953	Up
FLJ22184	0.000348575	0.00411988	21.579	0.943314	4.51575	Up
SLAIN1	0.000348575	0.00411988	23.9711	1.0723	4.48252	Up
C1orf226	0.014137	0.0452791	6.311	0.285038	4.46864	Up
FOS	0.000348575	0.00411988	438.704	19.8352	4.46711	Up
SOX5	0.000348575	0.00411988	22.6635	1.02708	4.46374	Up
CNTN2	0.0126049	0.0404874	8.83257	0.401627	4.45891	Up
MYH14	0.000348575	0.00411988	89.2339	4.09469	4.44577	Up
2003-09-01	0.000348575	0.00411988	45.3391	2.12217	4.41714	Up
GNG4	0.000348575	0.00411988	70.4872	3.33598	4.40118	Up
LINC00470	0.0015371	0.00994131	2.3705	0.112901	4.39207	Up
OSR2	0.000338837	0.00411988	23.2912	1.1118	4.38881	Up
NTN1	0.000348575	0.00411988	35.6361	1.72946	4.36495	Up
HBA1	0.0084829	0.0312993	8.85149	0.434928	4.34707	Up
SLCO4A1	0.000348575	0.00411988	47.202	2.32981	4.34056	Up
LOC100505483	0.000346122	0.00411988	17.0682	0.842576	4.34036	Up
C8orf46	0.000348575	0.00411988	15.7615	0.784396	4.32868	Up
NLGN3	0.000348575	0.00411988	287.525	14.603	4.29935	Up
LMX1B	0.0084829	0.0312993	7.4748	0.382973	4.28672	Up
GCFC1-AS1	0.00728314	0.0270181	3.22952	0.166886	4.27438	Up
ZDHHC22	0.000338837	0.00411988	25.369	1.31117	4.27414	Up
QPRT	0.00126843	0.0082239	38.7488	2.04565	4.24352	Up
RUNDC3A	0.0146492	0.0456356	6.34498	0.337918	4.23087	Up
KLRC4	0.00952417	0.0327842	9.0967	0.486145	4.22589	Up
ANKRD20A5P	0.00168247	0.0100634	21.7117	1.17498	4.20777	Up
EXTL1	0.00279772	0.0146148	13.1208	0.715983	4.19579	Up
ATCAY	0.00774841	0.0287171	18.7783	1.02963	4.18887	Up
MAST1	0.000338837	0.00411988	11.3376	0.623654	4.18423	Up
H19	0.0151694	0.0456356	91.3098	5.04682	4.17732	Up
FLJ43860	0.00189222	0.0110619	10.2902	0.578017	4.15401	Up
GPR27	0.0161469	0.0484837	3.2208	0.183842	4.13088	Up
FXYD6	0.000348575	0.00411988	370.568	21.4013	4.11396	Up
CERS1	0.000348575	0.00411988	23.8757	1.3936	4.09866	Up
SLC1A1	0.000324598	0.00411988	7.09089	0.414447	4.09671	Up
NMNAT3	0.0109908	0.037709	3.79406	0.221903	4.09574	Up
GAD1	0.00231581	0.0121416	23.464	1.39389	4.07326	Up
POU3F2	0.000348575	0.00411988	64.1486	3.81859	4.07031	Up
NGFR	0.000348575	0.00411988	198.34	11.9685	4.05066	Up
DLGAP3	0.0161469	0.0484837	1.68852	0.104262	4.01747	Up
LOC283174	0.000338837	0.00411988	13.5172	0.836293	4.01465	Up
ANO5	0.00363499	0.0172602	2.1785	0.136524	3.9961	Up
ELOVL2	0.000348575	0.00411988	20.0305	1.26023	3.99045	Up
FAM19A5	0.000348575	0.00411988	53.2858	3.35658	3.98869	Up
ACSBG1	0.00226769	0.0121416	10.2996	0.64904	3.98814	Up
KCNIP2	0.000346122	0.00411988	8.75345	0.562495	3.95994	Up
TTC9B	0.000906039	0.00675394	4.88505	0.319919	3.93259	Up
ANKRD18DP	0.00229507	0.0121416	3.51169	0.231995	3.92	Up
GPRC5B	0.000348575	0.00411988	71.5609	4.74392	3.91502	Up
ATP1A3	0.00408785	0.0180091	44.5445	2.99671	3.8938	Up
CACNA1H	0.0084829	0.0312993	6.62709	0.446881	3.89041	Up
RTN4RL1	0.000670444	0.00557175	19.6939	1.35307	3.86344	Up
ARC	0.00410705	0.0180091	139.058	9.69813	3.84183	Up
MGAT4A	0.000346122	0.00411988	8.90177	0.621054	3.8413	Up
TNFRSF19	0.000922875	0.00675394	16.7581	1.16956	3.84082	Up
IQCK	0.000348575	0.00411988	117.376	8.21958	3.83593	Up
FAM134B	0.000348575	0.00411988	27.1574	1.90699	3.83198	Up
SLC6A11	0.000301829	0.00411988	6.16473	0.432988	3.83164	Up
WNT6	0.0046091	0.0200653	9.53425	0.672392	3.82574	Up
C2orf70	0.00483039	0.0210113	3.42847	0.241829	3.8255	Up
LPHN3	0.000346122	0.00411988	30.5627	2.15947	3.82302	Up
GNG7	0.000348575	0.00411988	36.4715	2.59481	3.81307	Up
EMILIN3	0.000872991	0.00675394	10.9297	0.778617	3.81119	Up
TSPAN7	0.00538664	0.0216298	29.9875	2.15966	3.79549	Up
BK250D10.8	0.000338837	0.00411988	7.89834	0.568888	3.79533	Up
CADM4	0.000348575	0.00411988	322.482	23.3503	3.78771	Up
NPPC	0.00294419	0.0147727	5.21228	0.377603	3.78697	Up
PDE3B	0.000324598	0.00411988	6.1791	0.450588	3.77751	Up
FAM155B	0.000338837	0.00411988	8.75183	0.646536	3.75878	Up
SNORD57	0.0109908	0.037709	2.37227	0.176591	3.74779	Up
DGAT2	0.00774841	0.0287171	7.82304	0.584889	3.74149	Up
CPVL	0.000348575	0.00411988	81.6027	6.11577	3.73801	Up
C16orf89	0.0116749	0.0381369	7.15712	0.540758	3.72632	Up
B3GAT1	0.000346122	0.00411988	28.0968	2.13272	3.71964	Up
MERTK	0.00045477	0.00479912	6.23611	0.476787	3.70923	Up
KIAA1274	0.000348575	0.00411988	106.834	8.18141	3.70688	Up
SLC29A2	0.00517422	0.0216298	8.20372	0.632689	3.69671	Up
PHYHIPL	0.0133708	0.0428775	6.51165	0.502409	3.69609	Up
LPL	0.000346122	0.00411988	127.258	9.90841	3.68296	Up
PPP2R2B	0.000348575	0.00411988	47.5989	3.71269	3.68039	Up
IDAS	0.00909928	0.0316815	3.90557	0.30607	3.6736	Up
BCHE	0.000348575	0.00411988	194.125	15.2768	3.66758	Up
HSPA7	0.00373278	0.0177192	5.28608	0.416343	3.66636	Up
LSAMP	0.000348575	0.00411988	37.4328	2.95631	3.66243	Up
ALK	0.00229507	0.0121416	3.61248	0.286506	3.65636	Up
CHD7	0.000348575	0.00411988	68.1136	5.47997	3.6357	Up
FXYD1	0.00538664	0.0216298	24.2522	1.97228	3.62018	Up
CCDC132	0.000483497	0.00479912	7.52799	0.614281	3.61529	Up
LHX2	0.000348575	0.00411988	505.553	41.3784	3.61091	Up
PELI1	0.000348575	0.00411988	34.0948	2.79373	3.60929	Up
BCAS1	0.00707665	0.026283	10.6018	0.869425	3.6081	Up
FAM184A	0.00403054	0.0180091	5.35267	0.441492	3.5998	Up
C16orf74	0.000348575	0.00411988	33.1632	2.74279	3.59587	Up
TCFL5	0.000348575	0.00411988	124.607	10.3474	3.59005	Up
CECR6	0.00307989	0.0147727	7.18912	0.601424	3.57936	Up
AQP7P3	0.000346122	0.00411988	13.6704	1.14403	3.57886	Up
NOTUM	0.00346569	0.016521	3.09049	0.259109	3.5762	Up
SPTBN2	0.000348575	0.00411988	33.4088	2.82928	3.56172	Up
HES6	0.000348575	0.00411988	258.572	21.9766	3.55652	Up
C20orf201	0.000473784	0.00479912	8.6431	0.735304	3.55514	Up
MIMT1	0.00363499	0.0172602	1.39408	0.119437	3.54499	Up
AATK	0.000324598	0.00411988	3.60331	0.310275	3.5377	Up
2004-09-01	0.000348575	0.00411988	107.274	9.25463	3.53498	Up
PDE4B	0.00918974	0.0316815	35.4617	3.10045	3.51571	Up
SBK1	0.000348575	0.00411988	49.0242	4.34714	3.49535	Up
C1orf106	0.000346122	0.00411988	13.1458	1.17276	3.48663	Up
HAPLN4	0.00517422	0.0216298	7.14487	0.637765	3.48581	Up
TUBB2B	0.000348575	0.00411988	1192.32	108.017	3.46445	Up
PAQR9	0.00403054	0.0180091	5.1381	0.470363	3.44939	Up
ADAM11	0.000338837	0.00411988	8.11156	0.746197	3.44235	Up
GLT25D2	0.000348575	0.00411988	53.1813	4.91105	3.43681	Up
RCOR2	0.000348575	0.00411988	53.2099	4.91649	3.436	Up
METRN	0.000348575	0.00411988	566.977	52.7188	3.4269	Up
CERS4	0.000348575	0.00411988	29.1954	2.74695	3.40984	Up
PTP4A3	0.00541053	0.0216298	57.0181	5.56041	3.35816	Up
PEG3	0.000348575	0.00411988	21.2588	2.0936	3.344	Up
TESC	0.00400046	0.0180091	2.52723	0.250349	3.33554	Up
PDIA2	0.000229348	0.00411988	2.26524	0.22513	3.33083	Up
MAPK4	0.000348575	0.00411988	12.4632	1.24552	3.32286	Up
C12orf34	0.000348575	0.00411988	20.2798	2.04734	3.30822	Up
ENHO	0.000348575	0.00411988	13.5225	1.36704	3.30624	Up
VAV3	0.0118489	0.0381369	31.7503	3.24154	3.29202	Up
NECAB2	0.000346122	0.00411988	17.9739	1.86081	3.2719	Up
KIF21A	0.000348575	0.00411988	40.8769	4.27396	3.25764	Up
CACNG4	0.00309519	0.0147727	52.4692	5.57887	3.23342	Up
PHF21B	0.000324598	0.00411988	10.3737	1.10455	3.2314	Up
TPD52	0.000348575	0.00411988	24.7366	2.64086	3.22757	Up
SORL1	0.000483497	0.00479912	16.0816	1.72225	3.22304	Up
CYCSP52	0.00909928	0.0316815	3.81253	0.409454	3.21897	Up
ETV3	0.00909928	0.0316815	3.81253	0.409454	3.21897	Up
LOC100130000	0.000348575	0.00411988	12.7676	1.37471	3.21529	Up
RAB33A	0.000348575	0.00411988	48.3822	5.25094	3.20383	Up
MBNL3	0.000348575	0.00411988	48.4289	5.26153	3.20231	Up
C3orf70	0.000338837	0.00411988	5.43866	0.595345	3.19145	Up
NR4A2	0.00126843	0.0082239	39.2757	4.30193	3.19058	Up
MAPK8IP2	0.000674763	0.00557175	33.5336	3.71148	3.17554	Up
P2RX5	0.000348575	0.00411988	13.6201	1.51303	3.17022	Up
LHFPL4	0.000906039	0.00675394	21.208	2.36906	3.16223	Up
ELMO1	0.000348575	0.00411988	75.6027	8.48731	3.15506	Up
HOXA2	0.00608411	0.0242671	1.76952	0.198896	3.15327	Up
TMEM170B	0.000348575	0.00411988	7.22938	0.818699	3.14247	Up
B4GALNT3	0.00126108	0.0082239	19.0002	2.16101	3.13624	Up
NINJ2	0.00126108	0.0082239	19.0002	2.16101	3.13624	Up
RTN4RL2	0.000348575	0.00411988	62.1353	7.07307	3.13501	Up
LRRTM2	0.000346122	0.00411988	5.9327	0.680442	3.12414	Up
FBLL1	0.000348575	0.00411988	26.6277	3.0596	3.12151	Up
EEF1A2	0.00410705	0.0180091	38.9182	4.50983	3.1093	Up
LRRC16B	0.00649967	0.0258788	3.61451	0.420478	3.1037	Up
NIM1	0.00531531	0.0216298	7.47966	0.881418	3.08507	Up
SNORD80	0.00883277	0.0316815	2.57807	0.304619	3.08121	Up
NOVA1	0.000348575	0.00411988	20.1208	2.38379	3.07736	Up
ST3GAL6	0.000348575	0.00411988	23.4359	2.83399	3.04781	Up
SLC1A3	0.00123919	0.0082239	10.656	1.29431	3.04142	Up
TNFRSF13C	0.00303425	0.0147727	3.52899	0.429981	3.03691	Up
MAP3K1	0.000348575	0.00411988	103.333	12.6641	3.02848	Up
F12	0.000348575	0.00411988	14.5148	1.78329	3.02491	Up
DGKG	0.00494377	0.0214807	3.05378	0.376093	3.02144	Up
VWA1	0.000348575	0.00411988	46.0364	5.70695	3.01198	Up
SCARB1	0.000348575	0.00411988	256.965	31.8641	3.01157	Up
CENPV	0.000348575	0.00411988	201.429	25.0095	3.00972	Up
MMP15	0.000348575	0.00411988	50.4324	6.26529	3.0089	Up
DHRS13	0.000348575	0.00411988	46.3985	5.77651	3.00581	Up
LINC00485	0.000348575	0.00411988	30.7651	3.83339	3.0046	Up
PCOLCE2	0.000674763	0.00557175	39.5704	4.9472	2.99974	Up
PCSK2	0.000348575	0.00411988	60.2626	7.53538	2.99951	Up
SYP	0.00168247	0.0100634	11.1837	1.40216	2.99567	Up
ABCA3	0.000348575	0.00411988	122.237	15.4244	2.9864	Up
DIP2A-IT1	0.00124036	0.0082239	1.85009	0.234302	2.98115	Up
RRN3P1	0.000348575	0.00411988	3.95587	0.501039	2.981	Up
DSCAM-AS1	0.000486766	0.00479912	5.49834	0.6979	2.9779	Up
ARL14	0.00231581	0.0121416	19.074	2.4372	2.96832	Up
GPR155	0.000348575	0.00411988	20.55	2.62689	2.96771	Up
LOC100499467	0.000348575	0.00411988	129.646	16.5901	2.96618	Up
CCDC40	0.0159218	0.0478444	1.71141	0.220628	2.9555	Up
PREX1	0.000348575	0.00411988	80.7393	10.438	2.95143	Up
GAS1	0.0151694	0.0456356	166.737	21.8082	2.93464	Up
TMC6	0.00172014	0.0100634	7.4414	0.974834	2.93235	Up
EPHB3	0.000348575	0.00411988	52.6659	6.94809	2.92218	Up
KLF15	0.000348575	0.00411988	15.2886	2.02806	2.91428	Up
MIR573	0.000657602	0.00557175	6.61335	0.88848	2.89597	Up
RASL10B	0.000348575	0.00411988	33.4484	4.50294	2.893	Up
LOC100499227	0.0016442	0.0100634	3.4608	0.46625	2.89193	Up
TTTY15	0.000473784	0.00479912	2.31172	0.314398	2.8783	Up
CELF2	0.000928533	0.00675394	10.6147	1.44673	2.87519	Up
TIMP4	0.000348575	0.00411988	24.9455	3.41762	2.86771	Up
CHDH	0.00707665	0.026283	13.2352	1.82346	2.85963	Up
HSD3BP4	0.000486766	0.00479912	32.0807	4.4598	2.84666	Up
GYG2	0.000483497	0.00479912	15.6084	2.1728	2.8447	Up
LRP4	0.0118489	0.0381369	25.485	3.57277	2.83453	Up
FCHO1	0.000348575	0.00411988	19.2735	2.71165	2.82938	Up
TERT	0.000324598	0.00411988	4.62252	0.650431	2.82921	Up
LAMA1	0.000348575	0.00411988	22.6173	3.18257	2.82916	Up
FAM178B	0.000346122	0.00411988	7.16113	1.00996	2.82589	Up
NRARP	0.000486766	0.00479912	15.1844	2.14572	2.82306	Up
CXorf36	0.000348575	0.00411988	6.70365	0.951157	2.81719	Up
DNAJC28	0.000906039	0.00675394	1.86302	0.266755	2.80405	Up
CCND2	0.00541053	0.0216298	69.9897	10.0272	2.80322	Up
LOC100133985	0.000346122	0.00411988	4.56753	0.658897	2.79329	Up
SYK	0.00707665	0.026283	7.28205	1.05499	2.78711	Up
LOC729444	0.000348575	0.00411988	27.6192	4.01427	2.78247	Up
SHC3	0.00541053	0.0216298	38.4003	5.65486	2.76355	Up
CNTN1	0.000591965	0.00557175	1.83989	0.270974	2.76339	Up
RHPN1	0.000348575	0.00411988	16.6224	2.46635	2.75268	Up
NOTCH1	0.000348575	0.00411988	88.6031	13.1495	2.75235	Up
NUP210L	0.0114161	0.0381369	2.43515	0.362706	2.74714	Up
C2orf55	0.00909928	0.0316815	2.33714	0.349867	2.73987	Up
C8orf85	0.00139633	0.00904944	1.86686	0.282061	2.72653	Up
KCNAB3	0.00410705	0.0180091	11.6115	1.75592	2.72525	Up
SUSD5	0.0165499	0.0496467	15.2933	2.31538	2.72358	Up
SLC5A12	0.00231581	0.0121416	11.0373	1.68327	2.71305	Up
HRK	0.000674763	0.00557175	7.71335	1.18015	2.70839	Up
SSH1	0.000348575	0.00411988	14.3475	2.19587	2.70793	Up
ISYNA1	0.000348575	0.00411988	77.827	12.0299	2.69365	Up
ETV4	0.000348575	0.00411988	143.256	22.2199	2.68867	Up
LRP8	0.000348575	0.00411988	13.3786	2.07849	2.68631	Up
MAPK15	0.0161469	0.0484837	1.17724	0.184373	2.67471	Up
SEC61A2	0.00303425	0.0147727	3.1322	0.491816	2.67099	Up
TM7SF2	0.000348575	0.00411988	57.2825	9.00154	2.66985	Up
OSR1	0.00231581	0.0121416	81.909	12.8743	2.66953	Up
OXCT2	0.000534695	0.00526179	4.41861	0.696727	2.66493	Up
NTRK3	0.00883277	0.0316815	4.70541	0.742286	2.66427	Up
DLX6-AS1	0.0162905	0.0489055	3.62667	0.572128	2.66423	Up
RNF144A	0.000348575	0.00411988	23.368	3.69186	2.66211	Up
APOD	0.000348575	0.00411988	129.358	20.5539	2.65389	Up
ZNF704	0.000348575	0.00411988	14.5707	2.34242	2.63699	Up
CEACAM5	0.00230372	0.0121416	4.62612	0.746112	2.63234	Up
ASB11	0.00231581	0.0121416	2.93688	0.476975	2.6223	Up
ABAT	0.000348575	0.00411988	24.3428	3.95408	2.62208	Up
CKMT1A	0.000324598	0.00411988	5.0269	0.816921	2.6214	Up
LOC100505865	0.0114161	0.0381369	7.31742	1.19652	2.61249	Up
RPS6KL1	0.00649967	0.0258788	4.09989	0.670668	2.61192	Up
P2RX7	0.000346122	0.00411988	35.5293	5.83196	2.60696	Up
FLRT1	0.00531531	0.0216298	5.04413	0.829385	2.60449	Up
C1orf21	0.00126843	0.0082239	7.92117	1.31005	2.5961	Up
CRTAC1	0.00904611	0.0316815	2.19268	0.362784	2.59552	Up
LDLRAD3	0.000348575	0.00411988	95.5309	15.8407	2.59234	Up
MDFI	0.000348575	0.00411988	130.387	21.6682	2.58914	Up
ADD2	0.00494377	0.0214807	2.79775	0.465605	2.58709	Up
SHROOM4	0.000486766	0.00479912	24.7072	4.12368	2.58292	Up
LOC144486	0.0084829	0.0312993	2.13201	0.356111	2.58182	Up
GNG2	0.000674763	0.00557175	55.669	9.30362	2.58101	Up
MAT1A	0.0084829	0.0312993	2.91119	0.487122	2.57925	Up
GABRA2	0.000674763	0.00557175	5.39265	0.902856	2.57843	Up
IGSF3	0.000486766	0.00479912	39.4892	6.62532	2.57539	Up
SFMBT2	0.000346122	0.00411988	6.4176	1.07895	2.57241	Up
MOG	0.000674763	0.00557175	5.68413	0.957724	2.56926	Up
SLC38A3	0.0118489	0.0381369	38.8923	6.55497	2.56882	Up
TMEM198	0.000928533	0.00675394	22.4838	3.79972	2.56492	Up
RP1-177G6.2	0.000674763	0.00557175	5.93268	1.0034	2.56379	Up
ICA1	0.000670444	0.00557175	7.687	1.3002	2.56368	Up
HERC5	0.000922875	0.00675394	5.6911	0.965004	2.5601	Up
CSGALNACT1	0.00172014	0.0100634	14.3744	2.43822	2.5596	Up
LINC00273	0.000928533	0.00675394	3.97515	0.674872	2.55832	Up
FHIT	0.000922875	0.00675394	8.34289	1.42134	2.55329	Up
SPSB4	0.000348575	0.00411988	33.6508	5.7466	2.54986	Up
LOC400958	0.000486766	0.00479912	20.6522	3.54192	2.54369	Up
NLGN4X	0.000348575	0.00411988	91.5193	15.7103	2.54237	Up
LMOD3	0.000486766	0.00479912	2.90528	0.498864	2.54196	Up
PRR22	0.000348575	0.00411988	8.13642	1.40234	2.53656	Up
FAM5B	0.000486766	0.00479912	4.94975	0.854965	2.53342	Up
GPR112	0.000348575	0.00411988	9.47024	1.63848	2.53105	Up
RP11-165H20.1	0.000348575	0.00411988	9.87177	1.70892	2.53023	Up
DBI	0.000348575	0.00411988	1570.1	272.401	2.52705	Up
SNORD38A	0.000338837	0.00411988	3.64716	0.63302	2.52645	Up
SLC47A1	0.000928533	0.00675394	31.3244	5.45355	2.52202	Up
CITED1	0.000348575	0.00411988	20.1836	3.52239	2.51856	Up
PLD6	0.000348575	0.00411988	26.2749	4.5873	2.51797	Up
SOX2-OT	0.00172014	0.0100634	29.3436	5.14305	2.51235	Up
TM6SF2	0.00219668	0.0121416	3.2511	0.571797	2.50735	Up
GLCCI1	0.000348575	0.00411988	35.6879	6.29538	2.50307	Up
ALDH5A1	0.000346122	0.00411988	8.72829	1.54784	2.49544	Up
H1FX-AS1	0.00309519	0.0147727	7.57874	1.34836	2.49076	Up
PEG3-AS1	0.000657602	0.00557175	3.90759	0.695563	2.49003	Up
MDGA2	0.000657602	0.00557175	5.51075	0.981468	2.48924	Up
TTYH2	0.00410705	0.0180091	21.5481	3.85527	2.48266	Up
SLC43A2	0.000348575	0.00411988	24.9663	4.48007	2.47839	Up
GADD45G	0.000674763	0.00557175	7.40497	1.33345	2.47333	Up
ADA	0.000674763	0.00557175	19.0769	3.45361	2.46565	Up
ELMOD1	0.000348575	0.00411988	6.30252	1.14295	2.46316	Up
LOC340037	0.00172014	0.0100634	8.50115	1.54275	2.46216	Up
SNORD22	0.0146492	0.0456356	2.17861	0.396638	2.45751	Up
CMTM8	0.000928533	0.00675394	6.39651	1.1726	2.44757	Up
UNC13A	0.0151694	0.0456356	61.8317	11.395	2.43995	Up
DPF1	0.00126843	0.0082239	33.4274	6.16652	2.4385	Up
LOC338817	0.00126843	0.0082239	20.5934	3.79905	2.43847	Up
TRPM8	0.00309519	0.0147727	4.30406	0.795229	2.43625	Up
LOC283856	0.000348575	0.00411988	3.9428	0.729682	2.43388	Up
LOC100507634	0.0118053	0.0381369	3.77931	0.705824	2.42074	Up
CKM	0.000906039	0.00675394	3.42624	0.640927	2.41839	Up
PANK1	0.00172014	0.0100634	4.50797	0.843939	2.41727	Up
MNX1	0.00172014	0.0100634	8.90648	1.6759	2.40992	Up
SNORD65	0.0116749	0.0381369	1.52458	0.290508	2.39176	Up
SOX6	0.000348575	0.00411988	15.4954	2.96499	2.38574	Up
SEMA6A	0.000348575	0.00411988	32.6083	6.2558	2.38197	Up
FLJ41200	0.000928533	0.00675394	4.40794	0.84774	2.37841	Up
LOC285965	0.000348575	0.00411988	5.31744	1.02844	2.37027	Up
SQLE	0.000348575	0.00411988	389.319	75.8439	2.35985	Up
BCL2L11	0.00231581	0.0121416	1.99291	0.388412	2.35922	Up
CKB	0.000348575	0.00411988	1319.59	257.328	2.35842	Up
NCALD	0.00883277	0.0316815	13.6323	2.66167	2.35662	Up
ZNF90	0.00147011	0.00951979	4.69807	0.918189	2.3552	Up
VSIG1	0.00230372	0.0121416	2.95102	0.57703	2.3545	Up
STAC2	0.000928533	0.00675394	10.0803	1.98031	2.34774	Up
TDRKH	0.000928533	0.00675394	4.9619	0.974914	2.34754	Up
TTC39C	0.000348575	0.00411988	17.6002	3.45852	2.34736	Up
UBAC2-AS1	0.00171068	0.0100634	2.20974	0.434466	2.34656	Up
SAPCD2	0.000348575	0.00411988	207.324	40.9557	2.33975	Up
LOC100630918	0.000348575	0.00411988	12.2706	2.42545	2.33888	Up
C12orf61	0.0084829	0.0312993	2.67317	0.528718	2.33798	Up
ATF3	0.000348575	0.00411988	42.7707	8.47672	2.33504	Up
EIF4G3	0.00226769	0.0121416	3.13007	0.620356	2.33502	Up
DPP6	0.000674763	0.00557175	32.8193	6.51481	2.33275	Up
CTSL2	0.000346122	0.00411988	7.49329	1.48913	2.33113	Up
CD1D	0.00915373	0.0316815	2.37365	0.472768	2.32791	Up
NPAS3	0.000348575	0.00411988	14.9376	2.99209	2.31973	Up
SLC7A2	0.000486766	0.00479912	5.23982	1.05239	2.31585	Up
S1PR2	0.000348575	0.00411988	24.0273	4.85405	2.30742	Up
LOC648691	0.000348575	0.00411988	3.41528	0.690101	2.30712	Up
MANEAL	0.000348575	0.00411988	62.4512	12.6406	2.30467	Up
CYP2J2	0.0116749	0.0381369	4.09299	0.834139	2.29479	Up
MARCKSL1	0.000348575	0.00411988	2285.25	466.628	2.29201	Up
RBM47	0.000674763	0.00557175	28.6491	5.85531	2.29067	Up
HS6ST2	0.000486766	0.00479912	75.1176	15.366	2.28941	Up
LRRC24	0.00172014	0.0100634	6.9294	1.42342	2.28337	Up
RAD21-AS1	0.000922875	0.00675394	4.8669	1.00149	2.28086	Up
LOC145820	0.00172014	0.0100634	2.23367	0.459722	2.28058	Up
KIAA1958	0.00172014	0.0100634	6.31352	1.29978	2.28018	Up
IL12B	0.00695917	0.026283	2.96584	0.611791	2.27733	Up
C11orf9	0.000486766	0.00479912	14.0364	2.90394	2.27309	Up
BSN	0.00530044	0.0216298	2.68221	0.555143	2.27249	Up
SAA2	0.00541053	0.0216298	4.33855	0.899062	2.27072	Up
MSH5-SAPCD1	0.000348575	0.00411988	33.7462	7.00152	2.26899	Up
SAPCD1	0.000348575	0.00411988	33.7462	7.00152	2.26899	Up
FAM9A	0.015117	0.0456356	2.88262	0.599414	2.26575	Up
LOC731424	0.000348575	0.00411988	11.1525	2.32294	2.26334	Up
ANGPT2	0.00410705	0.0180091	3.01208	0.629305	2.25893	Up
C10orf95	0.000348575	0.00411988	4.04512	0.845398	2.25848	Up
LOC100131564	0.00172014	0.0100634	13.2392	2.76723	2.2583	Up
CNNM2	0.00119618	0.0082239	3.27089	0.685169	2.25515	Up
RTN4R	0.0151694	0.0456356	11.1368	2.34298	2.24892	Up
KIF5C	0.00172014	0.0100634	24.2213	5.10548	2.24616	Up
AIPL1	0.000928533	0.00675394	3.86085	0.815574	2.24303	Up
MAP6D1	0.000348575	0.00411988	11.8817	2.52156	2.23636	Up
PRKCQ	0.000348575	0.00411988	3.22343	0.69056	2.22276	Up
FAM70A	0.00803887	0.0297446	7.25611	1.5566	2.2208	Up
EPHX2	0.0116749	0.0381369	11.2182	2.40721	2.22041	Up
HOMER1	0.00126843	0.0082239	23.629	5.08107	2.21736	Up
TMEM213	0.00126843	0.0082239	5.64166	1.21562	2.21443	Up
HSPA6	0.0149604	0.0456356	4.20965	0.907375	2.21393	Up
EFNA1	0.00517422	0.0216298	4.15729	0.897898	2.21102	Up
SNAP25	0.00410705	0.0180091	54.7897	11.8604	2.20776	Up
HIST2H2BC	0.000348575	0.00411988	14.8723	3.23452	2.20101	Up
LINC00550	0.000670444	0.00557175	2.90677	0.634225	2.19635	Up
CTXN1	0.000348575	0.00411988	235.671	51.4783	2.19474	Up
LOC645676	0.000928533	0.00675394	9.39509	2.05597	2.19209	Up
MCF2L2	0.000348575	0.00411988	2.09892	0.459888	2.19029	Up
ZNF37BP	0.000348575	0.00411988	28.4236	6.24228	2.18694	Up
UCP2	0.000348575	0.00411988	85.6903	18.8368	2.18558	Up
MACROD1	0.000348575	0.00411988	28.673	6.31577	2.18266	Up
TMEM121	0.000486766	0.00479912	62.795	13.8384	2.18197	Up
GOLM1	0.000348575	0.00411988	217.826	48.0129	2.18169	Up
KCNK5	0.00408785	0.0180091	2.68168	0.594184	2.17416	Up
LRRC27	0.00231581	0.0121416	3.12355	0.692476	2.17335	Up
RAC3	0.000348575	0.00411988	37.431	8.33339	2.16726	Up
TMEM133	0.000348575	0.00411988	22.8452	5.0869	2.16703	Up
GPR37L1	0.00126108	0.0082239	1.93297	0.431102	2.16472	Up
APBA2	0.000348575	0.00411988	49.5794	11.0885	2.16067	Up
HMGCS1	0.000348575	0.00411988	174.223	38.9767	2.16025	Up
GRASP	0.00538664	0.0216298	21.7659	4.872	2.15949	Up
LIFR	0.000486766	0.00479912	33.3266	7.46702	2.15807	Up
S1PR5	0.000486766	0.00479912	7.91318	1.7732	2.1579	Up
LAMA4	0.000348575	0.00411988	33.0773	7.41263	2.15778	Up
LOC80054	0.00208144	0.0121187	5.05295	1.1354	2.15392	Up
PIPOX	0.00707665	0.026283	17.5933	3.95503	2.15327	Up
ORC1	0.000348575	0.00411988	15.283	3.43648	2.15293	Up
PCA3	0.00410705	0.0180091	7.53435	1.69707	2.15044	Up
CLDND2	0.000348575	0.00411988	5.58133	1.25756	2.14998	Up
TMIE	0.000348575	0.00411988	4.61131	1.03913	2.1498	Up
CABP4	0.000928533	0.00675394	11.1362	2.51418	2.14709	Up
CORO7	0.000348575	0.00411988	31.6638	7.14992	2.14684	Up
TRAF4	0.000348575	0.00411988	334.156	75.4914	2.14614	Up
PLAC2	0.00538664	0.0216298	1.8644	0.422464	2.14181	Up
SHE	0.00307989	0.0147727	3.28794	0.747469	2.1371	Up
PTN	0.000674763	0.00557175	2369.68	539.533	2.13491	Up
LOC100506023	0.00918974	0.0316815	4.095	0.93358	2.13302	Up
CADM2	0.000674763	0.00557175	4.83696	1.10322	2.13238	Up
HCG9	0.00126843	0.0082239	5.99867	1.36977	2.13071	Up
FKBP5	0.000486766	0.00479912	5.67247	1.29896	2.12662	Up
KCNE3	0.000486766	0.00479912	3.48677	0.799941	2.12392	Up
ADAMTS9	0.00541053	0.0216298	48.8687	11.2204	2.12278	Up
MS4A10	0.00904611	0.0316815	2.11991	0.487402	2.12082	Up
TTPA	0.00126843	0.0082239	6.30249	1.4536	2.1163	Up
HIP1R	0.000348575	0.00411988	43.9944	10.1749	2.11231	Up
SH2B2	0.00704718	0.026283	4.69114	1.08861	2.10745	Up
PATE2	0.000674763	0.00557175	11.3474	2.63574	2.10608	Up
LOC441242	0.00126108	0.0082239	2.52517	0.587048	2.10483	Up
H1FX	0.000674763	0.00557175	180.624	42.1597	2.09905	Up
ZNF738	0.00231581	0.0121416	6.46162	1.51328	2.09421	Up
CD28	0.0116749	0.0381369	1.63342	0.382659	2.09377	Up
DBNDD1	0.000348575	0.00411988	32.0626	7.51217	2.09359	Up
LAPTM4B	0.000348575	0.00411988	419.292	98.2495	2.09343	Up
CD200	0.000348575	0.00411988	6.97184	1.63813	2.08949	Up
SLC15A2	0.00309519	0.0147727	2.92381	0.687355	2.08873	Up
C2CD4C	0.0118489	0.0381369	8.82409	2.07473	2.08853	Up
RBM19	0.00707665	0.026283	8.7005	2.05034	2.08523	Up
SEZ6L	0.00918974	0.0316815	30.3198	7.14976	2.08429	Up
KRT26	0.00541053	0.0216298	8.61034	2.03668	2.07985	Up
DSG3	0.00172014	0.0100634	3.64131	0.861942	2.07879	Up
ORC4	0.000486766	0.00479912	44.5145	10.5861	2.07211	Up
C19orf57	0.000348575	0.00411988	13.4	3.19046	2.0704	Up
CELSR3	0.000348575	0.00411988	24.6696	5.92082	2.05886	Up
FAM83A	0.000928533	0.00675394	3.10414	0.745466	2.05798	Up
MARK1	0.00168247	0.0100634	6.6443	1.59612	2.05755	Up
CMTM7	0.00231581	0.0121416	65.009	15.67	2.05263	Up
MYBL2	0.000348575	0.00411988	152.004	36.6948	2.05047	Up
ABCB5	0.00307989	0.0147727	3.39514	0.820241	2.04935	Up
MIR3650	0.00915373	0.0316815	5.13047	1.24005	2.04869	Up
LOC100130899	0.00172014	0.0100634	6.72754	1.62609	2.04867	Up
C8orf44-SGK3	0.00707665	0.026283	16.3474	3.95238	2.04827	Up
SGK3	0.00707665	0.026283	16.3474	3.95238	2.04827	Up
CKMT1B	0.00168247	0.0100634	4.38082	1.06026	2.04678	Up
SLC2A13	0.00172014	0.0100634	16.9921	4.12225	2.04336	Up
SLC39A14	0.00538664	0.0216298	2.20514	0.535094	2.043	Up
SLC19A3	0.000348575	0.00411988	2.86985	0.697797	2.0401	Up
TSHZ2	0.00172014	0.0100634	2.83592	0.691176	2.03669	Up
FAM60A	0.000928533	0.00675394	89.4592	21.813	2.03604	Up
ARL11	0.000674763	0.00557175	3.64504	0.890162	2.03379	Up
2014-09-01	0.000348575	0.00411988	4.55653	1.1148	2.03116	Up
RPRML	0.00410705	0.0180091	15.5046	3.79359	2.03106	Up
FGF9	0.00410705	0.0180091	6.44745	1.57834	2.03032	Up
C10orf58	0.000486766	0.00479912	48.3455	11.8357	2.03024	Up
ACSL6	0.000674763	0.00557175	3.56901	0.874475	2.02903	Up
PNPLA5	0.000348575	0.00411988	2.93114	0.718506	2.02839	Up
ASZ1	0.00707665	0.026283	2.05335	0.503655	2.02747	Up
RBM38	0.000348575	0.00411988	51.9437	12.751	2.02633	Up
C2CD4A	0.00126843	0.0082239	2.48137	0.610397	2.02332	Up
BSN-AS2	0.000928533	0.00675394	3.704	0.911345	2.02301	Up
PDLIM3	0.000486766	0.00479912	31.2635	7.69685	2.02214	Up
MGC34034	0.0118053	0.0381369	1.89108	0.466058	2.02063	Up
CEP85L	0.00231581	0.0121416	3.85911	0.952136	2.01903	Up
KCNK6	0.00231581	0.0121416	25.5765	6.31135	2.0188	Up
MAGEA4	0.0151648	0.0456356	3.14268	0.775805	2.01823	Up
ENOSF1	0.000674763	0.00557175	31.8454	7.86252	2.01802	Up
CRTAM	0.000348575	0.00411988	3.72399	0.919473	2.01797	Up
SPATA6	0.000928533	0.00675394	11.7447	2.90814	2.01384	Up
SEC14L4	0.00172014	0.0100634	1.72087	0.426973	2.01092	Up
XYLB	0.00408785	0.0180091	2.13568	0.530423	2.00948	Up
CYFIP2	0.00309519	0.0147727	39.7553	9.9027	2.00525	Up
HYLS1	0.000674763	0.00557175	3.44435	0.858966	2.00356	Up
NLRP8	0.00915373	0.0316815	2.93936	0.735301	1.9991	Up
FLJ30679	0.000348575	0.00411988	5.87747	1.4732	1.99625	Up
C1orf233	0.00126843	0.0082239	69.384	17.3972	1.99575	Up
PCDH7	0.000348575	0.00411988	15.5517	3.90008	1.99549	Up
SHC2	0.000348575	0.00411988	42.7597	10.731	1.99446	Up
LOC641746	0.000348575	0.00411988	18.6047	4.67554	1.99246	Up
SLC25A13	0.000348575	0.00411988	39.1278	9.83383	1.99237	Up
LOC100506649	0.000348575	0.00411988	26.3163	6.61728	1.99165	Up
TSPAN33	0.00226769	0.0121416	16.4733	4.15521	1.98714	Up
PLIN5	0.00410705	0.0180091	12.1472	3.06497	1.98668	Up
C6orf132	0.00172014	0.0100634	4.58577	1.15738	1.9863	Up
PAQR6	0.000348575	0.00411988	30.4506	7.69638	1.98422	Up
PEG10	0.00541053	0.0216298	362.097	91.7581	1.98047	Up
PDE4C	0.000928533	0.00675394	3.91669	0.994627	1.97741	Up
CNKSR3	0.00172014	0.0100634	6.55678	1.6657	1.97686	Up
ETV5	0.000348575	0.00411988	147.5	37.489	1.97618	Up
FAM74A2	0.00172014	0.0100634	2.11506	0.538299	1.97422	Up
FAM74A4	0.00172014	0.0100634	2.11506	0.538299	1.97422	Up
NBEAL2	0.000348575	0.00411988	12.5783	3.20322	1.97334	Up
CX3CL1	0.00231581	0.0121416	40.135	10.2317	1.97181	Up
GJC3	0.00531531	0.0216298	1.78426	0.455003	1.97138	Up
NOL12	0.000348575	0.00411988	57.8005	14.7931	1.96616	Up
C16orf5	0.00126843	0.0082239	44.7742	11.4636	1.96561	Up
SALL2	0.00172014	0.0100634	13.6552	3.49654	1.96545	Up
ACAP3	0.000348575	0.00411988	141.518	36.2551	1.96473	Up
C16orf88	0.000348575	0.00411988	70.3026	18.0213	1.96387	Up
GARNL3	0.00126108	0.0082239	4.4662	1.14519	1.96346	Up
C19orf76	0.000348575	0.00411988	9.50003	2.43707	1.96278	Up
HEATR7A	0.00915373	0.0316815	3.24697	0.834541	1.96004	Up
CEBPA	0.0151694	0.0456356	25.7754	6.63554	1.95771	Up
CD96	0.000674763	0.00557175	2.58974	0.666809	1.95746	Up
ETNK1	0.0151694	0.0456356	3.39178	0.876201	1.95271	Up
TP53AIP1	0.00309519	0.0147727	3.86433	0.998761	1.95201	Up
PCDHGA9	0.00172014	0.0100634	7.74346	2.00795	1.94726	Up
LOC729080	0.000348575	0.00411988	40.8968	10.6137	1.94606	Up
C21orf62	0.000348575	0.00411988	3.81722	0.990826	1.94582	Up
NR4A1	0.000348575	0.00411988	76.9252	19.9999	1.94347	Up
CRYM-AS1	0.00538664	0.0216298	2.19102	0.56979	1.9431	Up
SEC11C	0.000348575	0.00411988	104.849	27.3062	1.94102	Up
MLLT4-AS1	0.00309519	0.0147727	3.04144	0.792919	1.93951	Up
SNORA11	0.000348575	0.00411988	7.25451	1.89175	1.93915	Up
LOC100134229	0.000674763	0.00557175	14.964	3.90476	1.93819	Up
BCL7A	0.000348575	0.00411988	84.1193	22.0013	1.93485	Up
TRAP1	0.000348575	0.00411988	150.824	39.452	1.93469	Up
ELAVL4	0.00309519	0.0147727	3.2213	0.842874	1.93426	Up
LOC100129518	0.00707665	0.026283	3.43294	0.899523	1.93221	Up
DTWD2	0.000674763	0.00557175	2.49491	0.653954	1.93172	Up
CD83	0.000928533	0.00675394	13.8109	3.62337	1.9304	Up
CDCA7	0.000348575	0.00411988	54.5647	14.3159	1.93035	Up
PTPRD	0.00226769	0.0121416	5.42985	1.42482	1.93014	Up
SGK494	0.00126843	0.0082239	7.37534	1.93676	1.92907	Up
MAN1C1	0.00172014	0.0100634	12.1557	3.19561	1.92747	Up
LOC400891	0.000674763	0.00557175	4.82696	1.27004	1.92624	Up
CD84	0.0151694	0.0456356	2.14069	0.564489	1.92306	Up
SYNPO2L	0.00172014	0.0100634	3.694	0.974511	1.92243	Up
CCDC88C	0.000348575	0.00411988	27.5004	7.27519	1.9184	Up
GPR19	0.00230372	0.0121416	6.4299	1.70271	1.91697	Up
MCOLN2	0.00126843	0.0082239	5.76892	1.52801	1.91665	Up
ETV1	0.000348575	0.00411988	49.8024	13.1918	1.91657	Up
MC2R	0.0133708	0.0428775	1.26428	0.334954	1.91628	Up
GJD4	0.000928533	0.00675394	3.42598	0.908076	1.91563	Up
B4GALNT4	0.000348575	0.00411988	75.5227	20.0284	1.91486	Up
CRYGS	0.00339918	0.0162089	1.91267	0.507351	1.91454	Up
E2F2	0.000348575	0.00411988	16.5764	4.39758	1.91435	Up
ITPK1	0.00231581	0.0121416	2.63991	0.700589	1.91385	Up
QRFPR	0.00126843	0.0082239	2.12979	0.565709	1.91258	Up
CAHM	0.000486766	0.00479912	20.4393	5.43001	1.91232	Up
TOP1MT	0.000348575	0.00411988	46.5281	12.3641	1.91195	Up
OR11A1	0.00126843	0.0082239	7.874	2.09694	1.90881	Up
CHST11	0.000674763	0.00557175	116.329	31.067	1.90476	Up
ZIM3	0.00707665	0.026283	1.7093	0.457107	1.9028	Up
TSPAN13	0.000348575	0.00411988	16.2441	4.34531	1.90238	Up
LOC100129662	0.00538664	0.0216298	2.00203	0.535788	1.90173	Up
FHDC1	0.00918974	0.0316815	6.17294	1.65346	1.90047	Up
TBKBP1	0.00126843	0.0082239	26.2442	7.06727	1.89277	Up
GCSH	0.000348575	0.00411988	61.8293	16.6569	1.89217	Up
RNFT2	0.00303425	0.0147727	8.34515	2.24992	1.89107	Up
DNMBP-AS1	0.000674763	0.00557175	4.00072	1.08247	1.88593	Up
POM121L8P	0.00126843	0.0082239	2.86607	0.775665	1.88557	Up
PLXNB3	0.000486766	0.00479912	36.5957	9.92728	1.8822	Up
HTR3B	0.000674763	0.00557175	4.75861	1.29243	1.88045	Up
OR7C1	0.00126843	0.0082239	2.7645	0.751358	1.87945	Up
ALPP	0.000486766	0.00479912	3.35237	0.91243	1.8774	Up
ZNF276	0.000348575	0.00411988	37.0003	10.0843	1.87543	Up
MCTP2	0.00126843	0.0082239	2.28998	0.624139	1.87539	Up
FAT3	0.00126843	0.0082239	24.2059	6.59935	1.87496	Up
CXorf48	0.000486766	0.00479912	8.02791	2.18976	1.87425	Up
MIR3661	0.0067849	0.026283	1.29684	0.354526	1.87104	Up
LOC653653	0.00541053	0.0216298	13.7681	3.76988	1.86874	Up
LRG1	0.000486766	0.00479912	5.02407	1.37642	1.86794	Up
LOC645249	0.014137	0.0452791	1.81106	0.497124	1.86515	Up
ASRGL1	0.000674763	0.00557175	18.3761	5.04636	1.86452	Up
LOC283481	0.00410705	0.0180091	10.2914	2.82657	1.86431	Up
LOC100128822	0.0118489	0.0381369	24.7519	6.81083	1.86164	Up
TRIB2	0.000348575	0.00411988	306.57	84.3885	1.8611	Up
LSS	0.0118489	0.0381369	5.25439	1.44708	1.86038	Up
LOC100329109	0.000348575	0.00411988	24.3511	6.7213	1.85718	Up
USP49	0.00541053	0.0216298	3.12537	0.863445	1.85585	Up
KLHL23	0.000928533	0.00675394	18.3363	5.07971	1.85188	Up
PHOSPHO2-KLHL23	0.000928533	0.00675394	18.3363	5.07971	1.85188	Up
DHODH	0.000348575	0.00411988	30.4029	8.42729	1.85107	Up
NKD1	0.000348575	0.00411988	3.83258	1.06418	1.84858	Up
NFATC1	0.00918974	0.0316815	7.26757	2.01837	1.84828	Up
TMEM150C	0.015117	0.0456356	4.82582	1.34054	1.84796	Up
PRDM11	0.014137	0.0452791	1.14408	0.317857	1.84774	Up
C18orf56	0.000348575	0.00411988	20.3455	5.66306	1.84505	Up
TBC1D15	0.000348575	0.00411988	3.07439	0.856709	1.84342	Up
BTBD3	0.00707665	0.026283	107.942	30.1743	1.83886	Up
GIMAP1	0.00410705	0.0180091	5.15097	1.44092	1.83785	Up
SPATA24	0.000928533	0.00675394	4.06091	1.1362	1.83759	Up
LOC643623	0.000670444	0.00557175	2.32489	0.650909	1.83663	Up
NT5M	0.00126843	0.0082239	21.4233	6.00355	1.83529	Up
TM4SF20	0.00649967	0.0258788	2.47005	0.693717	1.83212	Up
NCCRP1	0.0118489	0.0381369	2.6707	0.751734	1.82892	Up
ZNF620	0.00541053	0.0216298	3.31932	0.934655	1.82838	Up
ZNF736	0.015117	0.0456356	2.64659	0.745746	1.82738	Up
DIRAS1	0.000348575	0.00411988	50.567	14.2643	1.82579	Up
LPAL2	0.00126843	0.0082239	24.6678	6.95998	1.82547	Up
GABRB3	0.00309519	0.0147727	10.1154	2.85505	1.82497	Up
ARID5A	0.0151694	0.0456356	32.3733	9.14022	1.8245	Up
ABCC4	0.00915373	0.0316815	1.84418	0.521912	1.8211	Up
MTUS1	0.00410705	0.0180091	8.09598	2.29465	1.81893	Up
TLR7	0.00704718	0.026283	1.68799	0.479248	1.81646	Up
GALNTL2	0.00918974	0.0316815	2.60248	0.739461	1.81534	Up
LRP5L	0.00918974	0.0316815	3.37318	0.958757	1.81487	Up
MMAB	0.000486766	0.00479912	84.8633	24.1256	1.81458	Up
RTKN	0.000348575	0.00411988	62.9231	17.8954	1.814	Up
PAFAH1B3	0.000348575	0.00411988	154.026	43.823	1.81341	Up
MS4A7	0.00309519	0.0147727	4.72885	1.34619	1.81261	Up
LAIR1	0.000928533	0.00675394	3.62996	1.03367	1.81217	Up
LOC643406	0.000348575	0.00411988	27.5801	7.86817	1.80953	Up
C8orf86	0.000348575	0.00411988	3.14427	0.898191	1.80763	Up
LAPTM5	0.000632428	0.00557175	1.72556	0.493023	1.80734	Up
GCFC1	0.000928533	0.00675394	5.76644	1.64773	1.8072	Up
MFAP3L	0.00695917	0.026283	2.14722	0.61409	1.80594	Up
TMEM97	0.000348575	0.00411988	133.04	38.0544	1.80573	Up
GAB2	0.000348575	0.00411988	44.6535	12.8347	1.79873	Up
LMO4	0.00541053	0.0216298	17.4495	5.01758	1.79812	Up
LOC285954	0.00172014	0.0100634	3.8005	1.09429	1.79619	Up
C1orf140	0.00410705	0.0180091	3.11246	0.896343	1.79593	Up
CTNND2	0.00309519	0.0147727	20.1621	5.80677	1.79584	Up
MEX3A	0.000674763	0.00557175	58.4309	16.849	1.79407	Up
UGT2B15	0.000486766	0.00479912	24.8934	7.18837	1.79203	Up
DNM1	0.00126843	0.0082239	25.1188	7.25475	1.79177	Up
PLEKHG1	0.00538664	0.0216298	4.0717	1.17622	1.79147	Up
DNAH11	0.00309519	0.0147727	20.0248	5.78764	1.79074	Up
LOC100507564	0.00704718	0.026283	2.10526	0.609524	1.78824	Up
BRWD3	0.00172014	0.0100634	3.63243	1.0517	1.78821	Up
WWC1	0.000674763	0.00557175	14.4226	4.17776	1.78753	Up
L2HGDH	0.000348575	0.00411988	42.3391	12.2704	1.7868	Up
ZDHHC11	0.0118489	0.0381369	8.36728	2.42584	1.78627	Up
ARGFX	0.000486766	0.00479912	16.5686	4.80897	1.78465	Up
EIF5A2	0.0151694	0.0456356	27.8445	8.08198	1.78461	Up
METTL8	0.00230372	0.0121416	3.51042	1.02004	1.78302	Up
RHBDL1	0.0151694	0.0456356	5.16303	1.50063	1.78265	Up
FAM117B	0.00231581	0.0121416	9.1013	2.65198	1.779	Up
PTPRJ	0.000486766	0.00479912	22.4512	6.54247	1.77889	Up
RBMY2FP	0.00541053	0.0216298	2.26489	0.660382	1.77807	Up
SLC4A11	0.000928533	0.00675394	7.4217	2.16398	1.77806	Up
HIST1H2AM	0.0118489	0.0381369	4.77779	1.39521	1.77586	Up
CYP27B1	0.00172014	0.0100634	7.47908	2.18411	1.77582	Up
TYMS	0.000348575	0.00411988	288.41	84.2844	1.77479	Up
PGM5P2	0.00126843	0.0082239	14.1319	4.13652	1.77246	Up
NOP56	0.000348575	0.00411988	416.398	122.135	1.76948	Up
MAGEB10	0.00231581	0.0121416	3.63859	1.06887	1.7673	Up
MAGED2	0.000348575	0.00411988	438.504	129.146	1.76359	Up
HSPA12A	0.00231581	0.0121416	19.4465	5.72911	1.76313	Up
IGDCC3	0.000674763	0.00557175	11.0059	3.24294	1.7629	Up
GDAP1	0.000486766	0.00479912	12.5159	3.69794	1.75897	Up
SEC14L2	0.00126843	0.0082239	11.6829	3.45684	1.75688	Up
SEC14L5	0.000928533	0.00675394	4.2579	1.26028	1.7564	Up
CLUL1	0.000348575	0.00411988	15.3423	4.54475	1.75524	Up
KCNQ3	0.0104331	0.0358424	0.745657	0.220979	1.7546	Up
CACNA1D	0.0118489	0.0381369	5.45253	1.61607	1.75444	Up
RAB3A	0.0118053	0.0381369	5.96298	1.76905	1.75306	Up
FLJ34690	0.00707665	0.026283	6.16494	1.83067	1.75171	Up
GPD2	0.000486766	0.00479912	64.5878	19.1797	1.75168	Up
CTNNBIP1	0.000348575	0.00411988	73.5808	21.9257	1.74671	Up
PPT1	0.000674763	0.00557175	89.1856	26.6242	1.74408	Up
KLRG1	0.00309519	0.0147727	4.98271	1.48757	1.74397	Up
SRSF12	0.00230372	0.0121416	5.59846	1.67148	1.7439	Up
DENND1A	0.000486766	0.00479912	21.8464	6.52727	1.74284	Up
LOC284408	0.0149604	0.0456356	3.53856	1.05848	1.74117	Up
C7orf46	0.000348575	0.00411988	22.5729	6.75559	1.74043	Up
LILRA5	0.000486766	0.00479912	11.5417	3.45647	1.73948	Up
DGKB	0.00126843	0.0082239	2.73075	0.821301	1.73332	Up
SLC16A6	0.0151694	0.0456356	3.62383	1.09022	1.7329	Up
SLC44A4	0.00918974	0.0316815	1.82465	0.549444	1.73157	Up
PRKY	0.0118489	0.0381369	3.06968	0.924651	1.73111	Up
PCCB	0.000348575	0.00411988	112.576	33.9631	1.72886	Up
TYMP	0.00231581	0.0121416	7.06723	2.13351	1.72792	Up
KIAA1324	0.00231581	0.0121416	4.55425	1.37537	1.72739	Up
LBR	0.000348575	0.00411988	92.4972	27.9351	1.72733	Up
C2orf83	0.0151694	0.0456356	2.81404	0.850748	1.72584	Up
NPHS1	0.00410705	0.0180091	4.98402	1.50756	1.7251	Up
PCSK5	0.0118489	0.0381369	3.36782	1.01953	1.72391	Up
NWD1	0.000928533	0.00675394	3.49547	1.059	1.72278	Up
GRM6	0.00309519	0.0147727	3.79299	1.15042	1.72118	Up
SLAMF6	0.000348575	0.00411988	9.96556	3.02342	1.72077	Up
AKR1D1	0.00126843	0.0082239	3.82374	1.1615	1.719	Up
WDR17	0.00230372	0.0121416	2.30735	0.702218	1.71624	Up
ANKRD13B	0.000348575	0.00411988	53.5765	16.3079	1.71603	Up
ATG9B	0.00309519	0.0147727	2.27003	0.690996	1.71596	Up
WDR77	0.000348575	0.00411988	39.5378	12.0406	1.71533	Up
PRKX	0.00918974	0.0316815	16.0645	4.89297	1.71509	Up
LINGO1	0.00704718	0.026283	71.0452	21.6445	1.71474	Up
PIPSL	0.000348575	0.00411988	73.4526	22.3786	1.7147	Up
MAB21L3	0.00309519	0.0147727	59.3916	18.1029	1.71404	Up
ZNF431	0.000670444	0.00557175	4.43684	1.35375	1.71258	Up
LOC100505495	0.00918974	0.0316815	3.31588	1.01375	1.7097	Up
TMEM236	0.00410705	0.0180091	1.86258	0.569568	1.70936	Up
PIF1	0.000348575	0.00411988	41.0982	12.5808	1.70785	Up
SNORD35B	0.0118053	0.0381369	2.21445	0.678061	1.70746	Up
NRGN	0.00126843	0.0082239	59.5408	18.2401	1.70676	Up
LOC100294362	0.00230372	0.0121416	2.05936	0.631021	1.70643	Up
DUSP9	0.00541053	0.0216298	7.52766	2.31001	1.7043	Up
LOC284379	0.00918974	0.0316815	1.91826	0.589649	1.70187	Up
C2orf80	0.00707665	0.026283	3.99954	1.23132	1.69963	Up
PPEF2	0.00541053	0.0216298	1.95206	0.601064	1.69941	Up
LOC100507032	0.00172014	0.0100634	6.1971	1.9084	1.69923	Up
SLC7A14	0.00126843	0.0082239	3.16574	0.975969	1.69763	Up
ID4	0.00172014	0.0100634	74.8651	23.0893	1.69707	Up
PCSK6	0.00704718	0.026283	1.81835	0.560992	1.69657	Up
GINS1	0.000348575	0.00411988	53.8687	16.6286	1.69579	Up
LINC00314	0.00126843	0.0082239	4.65759	1.44845	1.68508	Up
C17orf69	0.00231581	0.0121416	4.32633	1.34683	1.68358	Up
CCDC144B	0.000486766	0.00479912	14.5099	4.52504	1.68104	Up
LOC152024	0.0118489	0.0381369	3.91381	1.22215	1.67916	Up
PCDHB19P	0.00172014	0.0100634	4.27212	1.33434	1.67882	Up
XAF1	0.00918974	0.0316815	6.47554	2.02462	1.67735	Up
ZNF121	0.00172014	0.0100634	6.50199	2.03297	1.67729	Up
HSH2D	0.000928533	0.00675394	9.24473	2.89494	1.6751	Up
CCDC78	0.000348575	0.00411988	68.7844	21.5506	1.67435	Up
SORD	0.000348575	0.00411988	55.944	17.5347	1.67377	Up
PPFIA3	0.000348575	0.00411988	28.5303	8.95072	1.67242	Up
KIF15	0.000486766	0.00479912	16.5458	5.19157	1.67222	Up
DUS3L	0.000928533	0.00675394	38.2557	12.011	1.67132	Up
TMOD2	0.00410705	0.0180091	8.02544	2.52013	1.67109	Up
KIAA1751	0.00309519	0.0147727	2.04979	0.644026	1.67029	Up
MIR17HG	0.015117	0.0456356	1.97083	0.619316	1.67005	Up
C1orf186	0.0151694	0.0456356	6.6713	2.09712	1.66956	Up
ZNF589	0.000486766	0.00479912	10.0394	3.16055	1.66743	Up
FLJ30838	0.00309519	0.0147727	2.53077	0.796812	1.66727	Up
CELSR2	0.0118489	0.0381369	27.5844	8.68718	1.66689	Up
MIPEP	0.00918974	0.0316815	8.64892	2.72605	1.66571	Up
ZNF527	0.00231581	0.0121416	12.2863	3.87844	1.6635	Up
C7orf65	0.00707665	0.026283	1.85	0.584444	1.66239	Up
ADH4	0.00126843	0.0082239	7.23002	2.28455	1.66209	Up
USP54	0.0118489	0.0381369	11.7672	3.71954	1.66157	Up
HNRNPA3	0.000348575	0.00411988	78.5758	24.8554	1.66053	Up
HUS1B	0.000928533	0.00675394	3.76718	1.19255	1.65943	Up
C14orf80	0.000486766	0.00479912	67.4995	21.3712	1.65921	Up
RANBP1	0.000486766	0.00479912	1244.88	394.168	1.65912	Up
ZBTB12	0.00541053	0.0216298	17.8347	5.64714	1.6591	Up
DYNC1I1	0.0118053	0.0381369	4.25644	1.35081	1.65582	Up
FAM120C	0.015117	0.0456356	5.63732	1.78957	1.65539	Up
MLIP	0.00541053	0.0216298	2.31395	0.735293	1.65397	Up
PLA2G2D	0.000928533	0.00675394	6.80275	2.16503	1.65173	Up
ARGFXP2	0.00707665	0.026283	1.98411	0.631509	1.65162	Up
SEMA4D	0.000348575	0.00411988	9.77335	3.11139	1.65129	Up
DNASE1	0.000486766	0.00479912	31.0452	9.88749	1.65069	Up
INE1	0.000348575	0.00411988	5.45375	1.73739	1.65032	Up
CNIH2	0.000674763	0.00557175	39.7743	12.6958	1.64748	Up
LOC100289092	0.000486766	0.00479912	25.7749	8.23017	1.64697	Up
ZNHIT6	0.00231581	0.0121416	3.46177	1.10558	1.6467	Up
ARHGAP42	0.00226769	0.0121416	3.63178	1.16059	1.64582	Up
MTTP	0.00541053	0.0216298	6.22802	1.99264	1.64409	Up
LOC100129716	0.000348575	0.00411988	26.728	8.56217	1.6423	Up
ANO6	0.00126843	0.0082239	3.84577	1.23278	1.64135	Up
LOC646851	0.00918974	0.0316815	1.59189	0.510713	1.64015	Up
LOC100240735	0.00309519	0.0147727	2.15804	0.692608	1.63961	Up
NLE1	0.00541053	0.0216298	24.4443	7.8634	1.63628	Up
RECQL4	0.000674763	0.00557175	45.2034	14.5515	1.63526	Up
LOC100505716	0.0118053	0.0381369	2.79024	0.898407	1.63495	Up
GINS2	0.000348575	0.00411988	126.238	40.6485	1.63488	Up
IMPA2	0.000674763	0.00557175	40.9768	13.1967	1.63462	Up
CCDC28B	0.000348575	0.00411988	33.0319	10.6644	1.63105	Up
FANCA	0.000928533	0.00675394	24.415	7.88598	1.6304	Up
SHISA2	0.0151694	0.0456356	37.67	12.1695	1.63015	Up
SNORD86	0.000928533	0.00675394	24.652	7.96909	1.62922	Up
LOC100506472	0.00172014	0.0100634	3.27259	1.06025	1.62604	Up
SCN11A	0.00231581	0.0121416	2.51881	0.816323	1.62553	Up
ZNF555	0.00707665	0.026283	2.52595	0.819588	1.62385	Up
FDPS	0.000348575	0.00411988	343.698	111.528	1.62374	Up
HIST2H2AC	0.00309519	0.0147727	12.3842	4.01895	1.62361	Up
ECT2L	0.00918974	0.0316815	2.23932	0.728209	1.62064	Up
CEACAM22P	0.0151694	0.0456356	3.4331	1.11651	1.62052	Up
PLXNB1	0.000348575	0.00411988	101.834	33.1184	1.62052	Up
SNRNP25	0.000348575	0.00411988	89.478	29.1034	1.62035	Up
VASH1	0.000348575	0.00411988	61.5388	20.02	1.62005	Up
PRDM15	0.00918974	0.0316815	6.44862	2.09817	1.61986	Up
FDFT1	0.000348575	0.00411988	280.447	91.2896	1.61921	Up
KHK	0.00231581	0.0121416	17.3488	5.64761	1.61912	Up
MVK	0.00231581	0.0121416	23.542	7.67724	1.61658	Up
AKAP8L	0.000674763	0.00557175	29.8885	9.74942	1.6162	Up
LMNB1	0.00172014	0.0100634	115.716	37.7526	1.61594	Up
OTUD6A	0.00231581	0.0121416	3.44476	1.12389	1.61591	Up
RAB39A	0.000348575	0.00411988	3.34356	1.09178	1.61471	Up
LOC100129269	0.00126843	0.0082239	12.3092	4.0263	1.61221	Up
FAM86B1	0.000348575	0.00411988	6.2741	2.05317	1.61156	Up
LRPPRC	0.000348575	0.00411988	68.3817	22.4051	1.60978	Up
C9orf153	0.00410705	0.0180091	1.91389	0.627309	1.60926	Up
SLC19A1	0.000674763	0.00557175	43.1545	14.1611	1.60758	Up
GPR82	0.000674763	0.00557175	2.99488	0.983777	1.60609	Up
ZNF850	0.00172014	0.0100634	4.23376	1.39077	1.60606	Up
CDC25A	0.000674763	0.00557175	32.4603	10.6654	1.60574	Up
C19orf26	0.000928533	0.00675394	15.0694	4.95218	1.60549	Up
THRB	0.00541053	0.0216298	11.591	3.81335	1.60388	Up
SCIN	0.00172014	0.0100634	4.18148	1.37631	1.60321	Up
DPPA4	0.00410705	0.0180091	2.00989	0.66165	1.60297	Up
ZNF542	0.00231581	0.0121416	18.0287	5.93814	1.60222	Up
HSPD1	0.000348575	0.00411988	524.785	173.145	1.59974	Up
TPTEP1	0.00309519	0.0147727	2.72836	0.900807	1.59875	Up
BATF3	0.00541053	0.0216298	11.7749	3.89194	1.59715	Up
TSEN2	0.000674763	0.00557175	7.42665	2.45812	1.59516	Up
FGFR2	0.00541053	0.0216298	3.49998	1.15852	1.59507	Up
TMTC2	0.00410705	0.0180091	13.2183	4.3855	1.59172	Up
PRDX2	0.00231581	0.0121416	32.1191	10.6636	1.59074	Up
CPSF6	0.000674763	0.00557175	28.5056	9.47188	1.58952	Up
WDR12	0.000348575	0.00411988	35.3866	11.7746	1.58753	Up
TTLL4	0.00231581	0.0121416	17.3163	5.76358	1.58709	Up
ZNF221	0.00541053	0.0216298	2.3298	0.775768	1.58651	Up
ODC1	0.000348575	0.00411988	768.27	255.965	1.58567	Up
KCMF1	0.000674763	0.00557175	2.48168	0.828165	1.58333	Up
ZNF483	0.000928533	0.00675394	4.30976	1.43897	1.58257	Up
RIMS3	0.00707665	0.026283	6.98793	2.33475	1.5816	Up
XKR5	0.0151694	0.0456356	3.02493	1.01102	1.5811	Up
CLEC11A	0.00172014	0.0100634	32.7325	10.9439	1.5806	Up
NTHL1	0.000348575	0.00411988	47.2301	15.7994	1.57984	Up
C17orf109	0.0118053	0.0381369	2.50362	0.838136	1.57876	Up
C17orf77	0.00231581	0.0121416	2.43011	0.814826	1.57646	Up
STK11IP	0.00309519	0.0147727	15.5561	5.22075	1.57516	Up
APC2	0.00172014	0.0100634	9.0832	3.04899	1.57487	Up
LOC401321	0.00126843	0.0082239	7.90262	2.6533	1.57454	Up
FAM161A	0.00541053	0.0216298	9.14116	3.07018	1.57406	Up
HIST1H4J	0.000348575	0.00411988	12.4456	4.18032	1.57395	Up
ELAVL1	0.000348575	0.00411988	13.7592	4.6242	1.57313	Up
VAX2	0.0118489	0.0381369	14.6648	4.92935	1.57289	Up
SNRPA	0.000348575	0.00411988	122.003	41.0214	1.57247	Up
LINC00467	0.000348575	0.00411988	47.3976	15.9439	1.57181	Up
C8ORFK29	0.00168247	0.0100634	2.45444	0.826447	1.5704	Up
ME2	0.000486766	0.00479912	29.2424	9.85833	1.56865	Up
DCXR	0.000348575	0.00411988	132.956	44.8632	1.56735	Up
FANCI	0.00231581	0.0121416	106.571	35.9827	1.56644	Up
FAM196A	0.00541053	0.0216298	18.0578	6.1043	1.56472	Up
GRIPAP1	0.000486766	0.00479912	6.94298	2.351	1.56228	Up
ABCB6	0.000486766	0.00479912	62.136	21.0691	1.5603	Up
DDX28	0.00172014	0.0100634	23.3874	7.93142	1.56008	Up
TUBB2A	0.000348575	0.00411988	295.081	100.188	1.55839	Up
LOC100128593	0.000348575	0.00411988	5.21261	1.77086	1.55756	Up
BAI2	0.00541053	0.0216298	73.3554	24.9289	1.55708	Up
AKAP7	0.000348575	0.00411988	5.60258	1.90623	1.55537	Up
CGN	0.0118053	0.0381369	7.3606	2.50742	1.55362	Up
FSD1	0.000348575	0.00411988	26.7949	9.13255	1.55287	Up
SLC16A9	0.0151694	0.0456356	11.6716	3.97909	1.55249	Up
MPST	0.000348575	0.00411988	96.0636	32.7532	1.55236	Up
SPRY1	0.00707665	0.026283	29.8076	10.1668	1.55182	Up
SLC9A7P1	0.00541053	0.0216298	4.99489	1.70377	1.55172	Up
NXNL1	0.00803887	0.0297446	1.75821	0.600296	1.55036	Up
ZNF529	0.000348575	0.00411988	4.52772	1.55065	1.54592	Up
DKFZP434L187	0.000674763	0.00557175	2.64881	0.907312	1.54567	Up
TRIM9	0.0151694	0.0456356	12.0341	4.12495	1.54468	Up
LOC100507401	0.0118489	0.0381369	3.57933	1.22714	1.54439	Up
TTF2	0.00410705	0.0180091	9.45372	3.24347	1.54334	Up
OTX2OS1	0.00410705	0.0180091	5.30968	1.82178	1.54327	Up
LOC100506874	0.00408785	0.0180091	2.43085	0.835355	1.541	Up
ASB4	0.00541053	0.0216298	5.42676	1.86707	1.53932	Up
FDPSL2A	0.000348575	0.00411988	23.9795	8.251	1.53916	Up
SNRPD1	0.000348575	0.00411988	348.883	120.609	1.53241	Up
PPP2R3B	0.0118489	0.0381369	24.2988	8.40205	1.53207	Up
ODZ1	0.00541053	0.0216298	5.19151	1.796	1.53136	Up
CCL5	0.000348575	0.00411988	3.97461	1.37603	1.5303	Up
TMEM160	0.00126843	0.0082239	58.3615	20.2103	1.52993	Up
KDM2B	0.000348575	0.00411988	37.5194	12.9958	1.52959	Up
MBTD1	0.000348575	0.00411988	14.6217	5.06798	1.52863	Up
FAM64A	0.000348575	0.00411988	91.7094	31.7933	1.52835	Up
GGA2	0.000928533	0.00675394	32.2396	11.1812	1.52776	Up
HAGHL	0.00231581	0.0121416	39.4653	13.6956	1.52687	Up
GSTTP2	0.00541053	0.0216298	1.57805	0.548551	1.52445	Up
TONSL	0.000348575	0.00411988	17.1112	5.94954	1.52409	Up
PCDH12	0.00918974	0.0316815	3.29661	1.14709	1.52301	Up
HMGB3P1	0.000928533	0.00675394	9.87823	3.43791	1.52272	Up
RFXANK	0.000348575	0.00411988	112.915	39.3016	1.52258	Up
SEC1	0.00309519	0.0147727	2.22245	0.773898	1.52193	Up
LOC81691	0.00918974	0.0316815	22.1572	7.71938	1.52122	Up
MTFP1	0.000348575	0.00411988	56.5536	19.7216	1.51984	Up
SARS2	0.000928533	0.00675394	33.1292	11.5606	1.51889	Up
TMEM212	0.000928533	0.00675394	23.4877	8.21039	1.51638	Up
DOCK10	0.00309519	0.0147727	43.4829	15.2027	1.51612	Up
MYH11	0.000348575	0.00411988	102.989	36.0248	1.51542	Up
ADIPOQ	0.0151694	0.0456356	2.71369	0.949295	1.51533	Up
DNMT3B	0.00309519	0.0147727	7.94014	2.78108	1.51352	Up
LINC00410	0.00541053	0.0216298	3.08878	1.08218	1.51309	Up
SPIRE2	0.000674763	0.00557175	10.0248	3.51307	1.51277	Up
LOC100190986	0.000928533	0.00675394	6.03091	2.11508	1.51167	Up
SCRIB	0.000348575	0.00411988	66.8408	23.4454	1.51143	Up
NFAM1	0.00172014	0.0100634	2.17195	0.76204	1.51105	Up
IL10	0.0118489	0.0381369	3.29008	1.1545	1.51085	Up
FXN	0.00231581	0.0121416	1.94105	0.681166	1.51076	Up
FASN	0.000348575	0.00411988	276.598	97.1088	1.51012	Up
LOC338758	0.00707665	0.026283	14.4792	5.08423	1.50988	Up
TMEM206	0.000348575	0.00411988	27.8104	9.76639	1.50973	Up
TMC5	0.00918974	0.0316815	4.47208	1.57104	1.50922	Up
MGC21881	0.00126843	0.0082239	25.0152	8.79218	1.50851	Up
PRIM1	0.000348575	0.00411988	17.7145	6.22774	1.50815	Up
FUS	0.000486766	0.00479912	226.6	79.7288	1.50698	Up
TSEN54	0.000928533	0.00675394	25.8841	9.10913	1.50668	Up
MNS1	0.00231581	0.0121416	22.2815	7.84477	1.50604	Up
GSG1	0.00126843	0.0082239	17.2276	6.06891	1.50521	Up
KCNK3	0.0151694	0.0456356	5.39183	1.90075	1.5042	Up
OIP5-AS1	0.000348575	0.00411988	23.621	8.32936	1.50379	Up
PART1	0.00707665	0.026283	2.83681	1.00042	1.50366	Up
LOC100505648	0.00707665	0.026283	2.3504	0.829973	1.50177	Up
SOX7	0.00126843	0.0082239	3.00081	1.06007	1.50119	Up
CLDN18	0.00918974	0.0316815	2.85445	1.00851	1.50099	Up
NOP58	0.000348575	0.00411988	250.724	88.6748	1.4995	Up
GALNT6	0.00126843	0.0082239	5.43549	1.92719	1.49591	Up
DAGLA	0.000674763	0.00557175	24.6514	8.7417	1.49568	Up
TEDDM1	0.00172014	0.0100634	3.07646	1.09145	1.49503	Up
RSL1D1	0.000928533	0.00675394	57.4899	20.4311	1.49254	Up
ECSIT	0.000674763	0.00557175	40.1397	14.2699	1.49206	Up
SPN	0.00918974	0.0316815	3.49888	1.24411	1.49178	Up
SCD5	0.000348575	0.00411988	12.7755	4.54522	1.49095	Up
GPR153	0.00707665	0.026283	49.6228	17.6645	1.49015	Up
PES1	0.000674763	0.00557175	95.7182	34.1131	1.48847	Up
GPR22	0.0116749	0.0381369	1.73293	0.618977	1.48525	Up
MLXIP	0.000348575	0.00411988	71.3378	25.4962	1.48439	Up
HES4	0.00410705	0.0180091	26.7719	9.57383	1.48355	Up
CXCL14	0.00309519	0.0147727	10.7605	3.84998	1.48282	Up
LOC100129480	0.000674763	0.00557175	6.33885	2.26803	1.48278	Up
FAM195A	0.000348575	0.00411988	50.8474	18.195	1.48263	Up
PSMD4	0.00126843	0.0082239	144.321	51.6451	1.48257	Up
ST7-AS1	0.00541053	0.0216298	30.3507	10.8641	1.48215	Up
ABHD3	0.000486766	0.00479912	38.5175	13.7916	1.48172	Up
DDX12P	0.000348575	0.00411988	18.1077	6.48601	1.4812	Up
FNBP4	0.000348575	0.00411988	19.3886	6.95359	1.47938	Up
LOC100505918	0.0118489	0.0381369	4.4058	1.58127	1.47832	Up
PAG1	0.00126843	0.0082239	5.18788	1.86242	1.47796	Up
CENPJ	0.00309519	0.0147727	16.9716	6.10783	1.47439	Up
C3orf71	0.000486766	0.00479912	13.5535	4.87819	1.47425	Up
C3orf39	0.000674763	0.00557175	51.0122	18.4024	1.47095	Up
METTL12	0.0118489	0.0381369	13.473	4.86303	1.47015	Up
ITPKA	0.000486766	0.00479912	12.9264	4.66931	1.46903	Up
GGT6	0.0151694	0.0456356	6.09745	2.20378	1.46823	Up
ANP32C	0.000486766	0.00479912	17.8113	6.45702	1.46385	Up
TRPV4	0.0151694	0.0456356	2.1636	0.784519	1.46355	Up
SATB2	0.00231581	0.0121416	71.5412	25.945	1.46332	Up
SCARF1	0.00707665	0.026283	2.7828	1.00925	1.46326	Up
CENPO	0.00231581	0.0121416	25.7261	9.33737	1.46214	Up
HTRA4	0.00172014	0.0100634	7.80763	2.83702	1.46051	Up
CBX3	0.000348575	0.00411988	383.021	139.223	1.46003	Up
ARHGAP31	0.000674763	0.00557175	19.1871	6.97837	1.45917	Up
FAM153C	0.000674763	0.00557175	1.97825	0.719639	1.45888	Up
HMHA1	0.000486766	0.00479912	18.8006	6.84326	1.45802	Up
IQCJ-SCHIP1	0.000348575	0.00411988	75.2929	27.408	1.45792	Up
SCHIP1	0.000348575	0.00411988	75.2929	27.408	1.45792	Up
FAM212B	0.0151694	0.0456356	18.7856	6.83938	1.45769	Up
ALPK1	0.00309519	0.0147727	12.2705	4.46892	1.45719	Up
TROAP	0.000348575	0.00411988	41.6923	15.2043	1.4553	Up
WDPCP	0.00309519	0.0147727	5.75674	2.09978	1.45501	Up
ZNF414	0.00172014	0.0100634	8.96166	3.26956	1.45467	Up
KIAA2018	0.00410705	0.0180091	5.09629	1.85937	1.45463	Up
RRP9	0.000348575	0.00411988	73.3988	26.7843	1.45437	Up
C20orf203	0.00172014	0.0100634	1.94559	0.711142	1.452	Up
LOC100506422	0.00707665	0.026283	2.19851	0.804234	1.45084	Up
TOMM40	0.00126843	0.0082239	322.088	117.828	1.45077	Up
NOS1	0.00309519	0.0147727	9.02118	3.3002	1.45076	Up
ZNF428	0.00126843	0.0082239	194.309	71.1081	1.45027	Up
HMGN2P46	0.000674763	0.00557175	225.305	82.4527	1.45024	Up
FLOT2	0.000348575	0.00411988	182.742	66.91	1.44951	Up
CLDN19	0.000674763	0.00557175	2.74825	1.0068	1.44874	Up
IGSF9B	0.0118489	0.0381369	4.1433	1.51922	1.44745	Up
LOC642846	0.000348575	0.00411988	18.3841	6.74555	1.44645	Up
CHEK2	0.000348575	0.00411988	28.5193	10.4698	1.44571	Up
FUT4	0.00707665	0.026283	2.90534	1.06694	1.44522	Up
RBMXL1	0.00126843	0.0082239	23.4694	8.62141	1.44479	Up
C4orf19	0.00410705	0.0180091	7.89401	2.90047	1.44447	Up
SNRPB2	0.000348575	0.00411988	392.521	144.369	1.44301	Up
NUP93	0.000348575	0.00411988	83.4582	30.7	1.44281	Up
CACNG8	0.00541053	0.0216298	5.80848	2.13756	1.44219	Up
SIGLEC10	0.00541053	0.0216298	2.6893	0.989815	1.442	Up
AICDA	0.00309519	0.0147727	5.39957	1.98739	1.44197	Up
DBF4B	0.0151694	0.0456356	2.34688	0.864014	1.44162	Up
LOC100129138	0.00309519	0.0147727	3.7744	1.39056	1.44058	Up
FBXL16	0.000348575	0.00411988	72.4332	26.6978	1.43993	Up
MVD	0.000348575	0.00411988	124.774	46.0214	1.43894	Up
BRI3BP	0.00172014	0.0100634	10.8599	4.01052	1.43716	Up
LEPROTL1	0.00918974	0.0316815	14.1765	5.23641	1.43685	Up
NCL	0.000348575	0.00411988	1143.09	422.909	1.43452	Up
PIM3	0.000674763	0.00557175	73.1834	27.0811	1.43423	Up
DNM1P46	0.0118489	0.0381369	3.64171	1.34818	1.4336	Up
ZNF608	0.00918974	0.0316815	40.0463	14.8317	1.43299	Up
ARRDC3	0.00172014	0.0100634	45.2619	16.7706	1.43236	Up
CAMKK2	0.00172014	0.0100634	15.0705	5.58588	1.43187	Up
ZNF551	0.000674763	0.00557175	11.3051	4.19449	1.43041	Up
HRSP12	0.000674763	0.00557175	34.4145	12.8059	1.4262	Up
FAM105A	0.000928533	0.00675394	1.73766	0.647153	1.42496	Up
TNFSF15	0.00172014	0.0100634	1.99995	0.745448	1.42378	Up
C8orf55	0.0118489	0.0381369	54.1424	20.1879	1.42327	Up
MRPL9	0.00707665	0.026283	67.766	25.2808	1.42252	Up
LOC100507537	0.000486766	0.00479912	12.7259	4.74799	1.42237	Up
LOC100128292	0.000348575	0.00411988	8.11973	3.03307	1.42065	Up
CECR5	0.000348575	0.00411988	152.657	57.0656	1.4196	Up
SRRM5	0.00707665	0.026283	28.5362	10.6843	1.4173	Up
LINC00526	0.00126843	0.0082239	8.36767	3.13364	1.41699	Up
EBF3	0.0118053	0.0381369	1.58344	0.593531	1.41567	Up
ZNF256	0.0151694	0.0456356	5.22379	1.96172	1.41297	Up
PCYOX1L	0.000674763	0.00557175	44.3515	16.6574	1.41282	Up
KCNA7	0.0118489	0.0381369	3.09984	1.16571	1.41099	Up
LOC100128071	0.00231581	0.0121416	9.36314	3.52185	1.41066	Up
SLC25A29	0.00126843	0.0082239	66.6781	25.1043	1.40928	Up
PHF16	0.000486766	0.00479912	9.75359	3.67462	1.40834	Up
MS4A2	0.00541053	0.0216298	3.07509	1.15965	1.40694	Up
CPNE2	0.000348575	0.00411988	326.738	123.231	1.40677	Up
KANK4	0.00707665	0.026283	3.13751	1.18337	1.40671	Up
BID	0.000348575	0.00411988	78.1132	29.4786	1.4059	Up
AFMID	0.00410705	0.0180091	2.54517	0.961061	1.40506	Up
FAM106A	0.00541053	0.0216298	3.23147	1.22021	1.40506	Up
HMGCR	0.000674763	0.00557175	83.7905	31.6437	1.40487	Up
SH3BP1	0.000674763	0.00557175	12.9317	4.89497	1.40154	Up
GATS	0.000928533	0.00675394	6.38567	2.41864	1.40064	Up
LIG3	0.00126843	0.0082239	4.59104	1.73963	1.40004	Up
REV3L	0.000928533	0.00675394	49.5799	18.8029	1.3988	Up
ZNF665	0.000348575	0.00411988	4.76681	1.80808	1.39856	Up
C1QBP	0.000348575	0.00411988	525.877	199.473	1.39853	Up
FEZ1	0.000348575	0.00411988	22.3744	8.4887	1.39823	Up
SESN3	0.000486766	0.00479912	10.1535	3.85439	1.39741	Up
GP2	0.00172014	0.0100634	3.22035	1.2228	1.39703	Up
LRRC10	0.00918974	0.0316815	3.27069	1.24192	1.39702	Up
TSPAN14	0.00231581	0.0121416	107.797	40.9327	1.39699	Up
SLC25A33	0.000348575	0.00411988	90.2377	34.2693	1.39681	Up
CGNL1	0.000928533	0.00675394	3.25448	1.23611	1.39661	Up
SNORA10	0.00126843	0.0082239	7.67121	2.91394	1.39648	Up
CACHD1	0.000928533	0.00675394	13.7963	5.24288	1.39585	Up
ENTPD3-AS1	0.000348575	0.00411988	6.80024	2.58547	1.39516	Up
FAM72D	0.00231581	0.0121416	11.7057	4.45292	1.39438	Up
SLITRK2	0.000348575	0.00411988	28.7478	10.9455	1.39311	Up
HOXA3	0.00231581	0.0121416	159.545	60.7917	1.39201	Up
BEND5	0.015117	0.0456356	5.22319	1.99158	1.39102	Up
CCDC120	0.00231581	0.0121416	5.00652	1.91331	1.38774	Up
PAFAH1B2	0.00918974	0.0316815	3.17316	1.21323	1.38707	Up
HCG25	0.00707665	0.026283	1.95991	0.750217	1.3854	Up
ATG4B	0.000348575	0.00411988	48.0814	18.4136	1.3847	Up
CNTF	0.00541053	0.0216298	1.99499	0.76413	1.38449	Up
PLEKHG6	0.00707665	0.026283	3.25604	1.24773	1.38381	Up
DHX34	0.000348575	0.00411988	24.2916	9.31072	1.38349	Up
SCAND1	0.000348575	0.00411988	96.934	37.173	1.38275	Up
DHCR7	0.000348575	0.00411988	133.069	51.0315	1.38272	Up
SCN2B	0.0151694	0.0456356	1.97885	0.759157	1.38219	Up
CHTF18	0.000348575	0.00411988	61.0974	23.4589	1.38097	Up
DGKE	0.000486766	0.00479912	3.16051	1.2136	1.38086	Up
NDUFA7	0.000348575	0.00411988	183.396	70.4782	1.37972	Up
MIRLET7D	0.00126843	0.0082239	23.139	8.89543	1.37919	Up
RSBN1L	0.000486766	0.00479912	42.8525	16.4743	1.37916	Up
STK32B	0.00126843	0.0082239	61.9534	23.8188	1.37908	Up
DSC1	0.00410705	0.0180091	2.57895	0.992339	1.37788	Up
ANP32AP1	0.000486766	0.00479912	24.2823	9.34629	1.37744	Up
CYP8B1	0.00231581	0.0121416	3.25825	1.25424	1.37728	Up
ZNF669	0.000674763	0.00557175	7.48015	2.88047	1.37676	Up
KDM1A	0.000674763	0.00557175	386.412	148.896	1.37583	Up
ZFP42	0.00918974	0.0316815	3.81061	1.46846	1.37572	Up
MCTS1	0.00172014	0.0100634	6.54099	2.52155	1.3752	Up
SCLY	0.000348575	0.00411988	19.3403	7.46746	1.37292	Up
DCAF10	0.00541053	0.0216298	7.38628	2.85892	1.36938	Up
MIR339	0.00918974	0.0316815	5.30238	2.05364	1.36846	Up
CDHR3	0.0118489	0.0381369	3.49156	1.35275	1.36798	Up
KIAA1456	0.00541053	0.0216298	5.14624	1.99521	1.36698	Up
CDH12	0.00918974	0.0316815	2.90218	1.12576	1.36623	Up
RPS2P32	0.000928533	0.00675394	337.861	131.069	1.3661	Up
SIRPB2	0.000674763	0.00557175	3.04121	1.18026	1.36554	Up
SLC6A8	0.000674763	0.00557175	79.4422	30.8334	1.36541	Up
PAR-SN	0.00410705	0.0180091	2.3602	0.917416	1.36326	Up
ITIH5	0.000928533	0.00675394	3.04839	1.18525	1.36286	Up
AHCY	0.000348575	0.00411988	164.632	64.0136	1.3628	Up
ECI1	0.00126843	0.0082239	130.679	50.8316	1.36223	Up
DCAF13	0.00172014	0.0100634	74.6302	29.0391	1.36176	Up
ARHGEF9	0.000928533	0.00675394	74.0681	28.8227	1.36165	Up
ZNF250	0.00918974	0.0316815	2.85862	1.11246	1.36157	Up
SWT1	0.0118489	0.0381369	5.54364	2.15848	1.36082	Up
TLR10	0.000348575	0.00411988	4.10532	1.59961	1.35977	Up
CERS3	0.00707665	0.026283	2.89696	1.12879	1.35976	Up
POLR1A	0.000928533	0.00675394	23.0503	8.99343	1.35784	Up
C16orf93	0.000928533	0.00675394	7.13836	2.78538	1.35772	Up
MORN1	0.015117	0.0456356	4.25912	1.66282	1.35692	Up
LOC100507217	0.000348575	0.00411988	204.537	79.8916	1.35625	Up
ZNF717	0.0151694	0.0456356	1.58538	0.619767	1.35503	Up
VSTM4	0.0151694	0.0456356	2.48184	0.970489	1.35463	Up
SCAI	0.00309519	0.0147727	8.51717	3.33078	1.35452	Up
LOC388152	0.000674763	0.00557175	17.4641	6.83283	1.35384	Up
EPT1	0.000928533	0.00675394	13.7762	5.38994	1.35383	Up
FAAH	0.0151694	0.0456356	3.15809	1.23598	1.35339	Up
MRPS26	0.000486766	0.00479912	99.5257	38.9989	1.35164	Up
CSPG4	0.00309519	0.0147727	532.857	208.834	1.35139	Up
EPHA3	0.00309519	0.0147727	2.12218	0.832827	1.34946	Up
SNRPD3	0.000348575	0.00411988	350.505	137.561	1.34937	Up
POLR2F	0.000348575	0.00411988	328.642	128.99	1.34926	Up
C9orf86	0.00918974	0.0316815	11.5308	4.52576	1.34926	Up
GLUL	0.000348575	0.00411988	156.132	61.2953	1.34892	Up
KIAA1524	0.000486766	0.00479912	17.2861	6.7905	1.34802	Up
CCDC69	0.000928533	0.00675394	3.54726	1.39404	1.34743	Up
KIAA0922	0.00126843	0.0082239	10.6952	4.20856	1.34556	Up
WASF3	0.0118489	0.0381369	29.6222	11.667	1.34425	Up
ALYREF	0.00172014	0.0100634	978.039	385.534	1.34303	Up
BOP1	0.000348575	0.00411988	71.3477	28.1296	1.34278	Up
LINC00311	0.00231581	0.0121416	3.70776	1.46304	1.34158	Up
DENND4B	0.000348575	0.00411988	46.0614	18.1856	1.34076	Up
LOC440434	0.00918974	0.0316815	8.24491	3.25736	1.3398	Up
CORO7-PAM16	0.00126843	0.0082239	60.7326	24.003	1.33926	Up
QPCTL	0.00309519	0.0147727	19.2113	7.59281	1.33925	Up
DPYSL4	0.00231581	0.0121416	85.356	33.7363	1.33919	Up
ARX	0.00918974	0.0316815	10.3232	4.08028	1.33915	Up
PHF14	0.00915373	0.0316815	4.16354	1.64606	1.33879	Up
PFAS	0.000348575	0.00411988	66.0261	26.1082	1.33853	Up
C10orf103	0.00231581	0.0121416	10.1571	4.0168	1.33837	Up
ADCK3	0.000674763	0.00557175	20.6801	8.17897	1.33825	Up
PHF19	0.00172014	0.0100634	61.5606	24.3582	1.3376	Up
MGC14436	0.00126843	0.0082239	5.23509	2.07169	1.3374	Up
LOC100190938	0.00410705	0.0180091	30.2578	11.9849	1.33608	Up
FUT6	0.00231581	0.0121416	4.34111	1.71986	1.33577	Up
DEPDC1B	0.000348575	0.00411988	14.0686	5.57475	1.3355	Up
PAFAH2	0.000348575	0.00411988	8.03993	3.19007	1.3336	Up
ASXL1	0.00541053	0.0216298	10.4565	4.15775	1.33052	Up
FAM72B	0.00309519	0.0147727	13.0316	5.18473	1.32968	Up
PHB2	0.000486766	0.00479912	274.029	109.167	1.32779	Up
TMEM48	0.000928533	0.00675394	23.4568	9.34634	1.32753	Up
STMN3	0.0151694	0.0456356	307.201	122.408	1.32749	Up
SH3KBP1	0.00410705	0.0180091	260.323	103.825	1.32614	Up
DDX11	0.000348575	0.00411988	31.2276	12.4578	1.32577	Up
TRMT1	0.000486766	0.00479912	52.9248	21.1178	1.32549	Up
ZNF57	0.000928533	0.00675394	8.27415	3.30313	1.32477	Up
SKP2	0.000674763	0.00557175	37.4935	14.9782	1.32378	Up
TMEM201	0.000348575	0.00411988	25.4638	10.1786	1.3229	Up
CDKN1B	0.000348575	0.00411988	40.3351	16.1379	1.32158	Up
KIAA1614	0.00126843	0.0082239	2.03447	0.814023	1.32151	Up
ZFP14	0.00309519	0.0147727	5.88949	2.3568	1.32131	Up
ANKRD45	0.00918974	0.0316815	8.17257	3.27123	1.32096	Up
MIR1292	0.00541053	0.0216298	13.6313	5.45701	1.32074	Up
ZCCHC3	0.000348575	0.00411988	46.0612	18.4457	1.32027	Up
KCNJ11	0.00126843	0.0082239	5.48651	2.19888	1.31912	Up
SPAG5	0.000348575	0.00411988	98.6759	39.5833	1.31781	Up
ABHD14A-ACY1	0.000486766	0.00479912	60.0902	24.1094	1.31754	Up
ACY1	0.000486766	0.00479912	60.0902	24.1094	1.31754	Up
MACROD2	0.00541053	0.0216298	2.87145	1.1524	1.31713	Up
LGALSL	0.00309519	0.0147727	13.5941	5.45748	1.31668	Up
FBXO48	0.00309519	0.0147727	3.69587	1.48423	1.3162	Up
TPTE2P1	0.00541053	0.0216298	4.5159	1.81363	1.31613	Up
PRPF38A	0.000348575	0.00411988	56.1963	22.5979	1.31429	Up
CEP78	0.00231581	0.0121416	23.2188	9.33911	1.31394	Up
PAM16	0.000348575	0.00411988	69.9849	28.153	1.31376	Up
C8orf37	0.00918974	0.0316815	2.96714	1.19426	1.31296	Up
PAK7	0.0151694	0.0456356	3.08071	1.24198	1.31063	Up
LYSMD2	0.00541053	0.0216298	6.49703	2.62005	1.31019	Up
C2orf15	0.0118489	0.0381369	3.40864	1.37652	1.30817	Up
KCP	0.0151694	0.0456356	2.12843	0.859623	1.30801	Up
CEMP1	0.000674763	0.00557175	18.5354	7.48961	1.30732	Up
ANP32A-IT1	0.00231581	0.0121416	5.65317	2.28508	1.30681	Up
LAMC2	0.00309519	0.0147727	4.826	1.95186	1.30598	Up
SYT17	0.000486766	0.00479912	16.3082	6.59746	1.30561	Up
LRRC37A2	0.00918974	0.0316815	4.78303	1.93506	1.30554	Up
MFF	0.000348575	0.00411988	64.9225	26.2886	1.30428	Up
SNHG9	0.00231581	0.0121416	36.4424	14.7577	1.30415	Up
B3GNT7	0.0151694	0.0456356	52.8033	21.3842	1.30408	Up
SAMD10	0.00918974	0.0316815	18.7936	7.61711	1.30293	Up
PRTFDC1	0.000674763	0.00557175	44.433	18.0181	1.30218	Up
MAPT	0.0118489	0.0381369	17.9764	7.29058	1.30199	Up
HMGB2	0.000486766	0.00479912	1378.89	559.249	1.30195	Up
ZDHHC8P1	0.000486766	0.00479912	2.88492	1.17163	1.30001	Up
TRIB1	0.000674763	0.00557175	36.5433	14.8533	1.29883	Up
TP73	0.00309519	0.0147727	39.4067	16.0226	1.29833	Up
C1orf114	0.00309519	0.0147727	9.40869	3.82962	1.29679	Up
HIST2H2BF	0.00707665	0.026283	1.71555	0.698614	1.2961	Up
MTRNR2L7	0.000674763	0.00557175	49.3674	20.105	1.296	Up
GEMIN8P4	0.00707665	0.026283	5.88365	2.39679	1.29561	Up
INGX	0.00309519	0.0147727	3.83419	1.56197	1.29556	Up
EPB41L5	0.00126843	0.0082239	17.089	6.9622	1.29545	Up
MSH2	0.000486766	0.00479912	45.59	18.5742	1.29542	Up
HAUS1	0.000674763	0.00557175	40.5288	16.5398	1.293	Up
AGER	0.00126843	0.0082239	5.62636	2.29661	1.2927	Up
CYP4F30P	0.0151694	0.0456356	1.72263	0.703606	1.29178	Up
CRMP1	0.00126843	0.0082239	250.378	102.304	1.29125	Up
TRIP13	0.00707665	0.026283	2.44251	0.99831	1.2908	Up
LY9	0.00918974	0.0316815	1.85667	0.758928	1.29068	Up
LOC100288069	0.00918974	0.0316815	3.9925	1.63429	1.28863	Up
TIGD1	0.000486766	0.00479912	18.6782	7.64682	1.28842	Up
CORO2A	0.000348575	0.00411988	11.5266	4.72095	1.28782	Up
RRP7B	0.000486766	0.00479912	35.568	14.5692	1.28765	Up
B4GALT3	0.00126843	0.0082239	31.5476	12.9235	1.28754	Up
ADAMTS4	0.00410705	0.0180091	7.37499	3.02157	1.28734	Up
LOC100132724	0.000928533	0.00675394	10.7505	4.40962	1.28567	Up
TNIK	0.00918974	0.0316815	13.3543	5.47899	1.28532	Up
SDC3	0.00309519	0.0147727	691.653	284.238	1.28295	Up
CNNM1	0.0118489	0.0381369	6.49794	2.67091	1.28265	Up
O3FAR1	0.00172014	0.0100634	7.26913	2.98885	1.28219	Up
LOC400752	0.00918974	0.0316815	2.32058	0.95499	1.28093	Up
LOC100129917	0.00126843	0.0082239	3.94859	1.62545	1.2805	Up
LOC727849	0.000348575	0.00411988	13.5111	5.56556	1.27954	Up
DDX55	0.00410705	0.0180091	44.3067	18.252	1.27947	Up
TRMT5	0.000348575	0.00411988	373.775	154.059	1.27869	Up
OR6W1P	0.00172014	0.0100634	36.3552	14.9852	1.27863	Up
JUND	0.000674763	0.00557175	1131.84	466.579	1.27848	Up
CYC1	0.000348575	0.00411988	197.557	81.4593	1.27812	Up
CDC25C	0.000674763	0.00557175	17.4601	7.20265	1.27746	Up
NEUROD1	0.0151694	0.0456356	22.3202	9.20974	1.27712	Up
KAT2A	0.000348575	0.00411988	72.8113	30.0495	1.27682	Up
CBX2	0.00126843	0.0082239	4.81784	1.9903	1.2754	Up
LGSN	0.00410705	0.0180091	5.66769	2.34149	1.27533	Up
ARRB2	0.000674763	0.00557175	81.2344	33.6016	1.27356	Up
FAM203A	0.000348575	0.00411988	18.5552	7.6784	1.27295	Up
DUSP6	0.00918974	0.0316815	100.515	41.6166	1.27218	Up
PDE6A	0.00126843	0.0082239	3.08046	1.27607	1.27144	Up
LOC145216	0.0118489	0.0381369	2.50496	1.03794	1.27107	Up
LRRC37A	0.00918974	0.0316815	4.72138	1.95685	1.27067	Up
MIIP	0.000486766	0.00479912	33.3223	13.8139	1.27036	Up
SHPK	0.000348575	0.00411988	13.2135	5.48036	1.26967	Up
RAB4B	0.000674763	0.00557175	55.6077	23.115	1.26646	Up
LOC100506054	0.00541053	0.0216298	36.4816	15.1751	1.26546	Up
GGCT	0.000348575	0.00411988	77.0446	32.0529	1.26524	Up
HSPE1	0.000348575	0.00411988	865.452	360.121	1.26497	Up
ACSL3	0.000486766	0.00479912	58.4843	24.3382	1.26483	Up
PCDHA9	0.00172014	0.0100634	5.16956	2.15236	1.26412	Up
LOC286186	0.00309519	0.0147727	4.46541	1.85922	1.26409	Up
MUTYH	0.00126843	0.0082239	14.0945	5.87023	1.26365	Up
FGF13	0.00541053	0.0216298	20.0903	8.36966	1.26325	Up
PARP1	0.000348575	0.00411988	278.5	116.063	1.26277	Up
C10orf125	0.00231581	0.0121416	26.1701	10.9072	1.26264	Up
HNRNPA1P10	0.000928533	0.00675394	900.742	375.426	1.26259	Up
IDO1	0.0151694	0.0456356	4.03061	1.68182	1.26098	Up
KANSL1-AS1	0.000486766	0.00479912	11.9507	4.98757	1.26069	Up
VN1R2	0.000348575	0.00411988	5.43755	2.26985	1.26036	Up
ZNF821	0.00309519	0.0147727	8.38104	3.49879	1.26027	Up
ITGAL	0.0118489	0.0381369	2.02344	0.845183	1.25947	Up
DIP2B	0.000348575	0.00411988	22.3474	9.33964	1.25867	Up
DHRS11	0.000348575	0.00411988	43.0134	17.9775	1.2586	Up
HNRNPA1L2	0.000928533	0.00675394	590.17	246.713	1.2583	Up
OTUD3	0.00541053	0.0216298	29.7802	12.4506	1.25814	Up
SLC43A1	0.000674763	0.00557175	12.2516	5.12742	1.25667	Up
ARHGEF26-AS1	0.00309519	0.0147727	15.782	6.60927	1.25572	Up
SAP30	0.000674763	0.00557175	150.97	63.2432	1.25528	Up
RBBP4	0.00707665	0.026283	14.4188	6.04535	1.25405	Up
RPA3	0.000486766	0.00479912	136.272	57.1583	1.25345	Up
UBAP2L	0.00309519	0.0147727	64.8406	27.2149	1.2525	Up
LOC145663	0.00707665	0.026283	4.59338	1.92882	1.25184	Up
FBRSL1	0.000674763	0.00557175	78.0393	32.7865	1.2511	Up
DCLRE1C	0.00231581	0.0121416	11.3415	4.76599	1.25076	Up
LOC90834	0.00309519	0.0147727	3.7575	1.58041	1.24948	Up
HNRNPA1	0.000928533	0.00675394	867.526	364.916	1.24934	Up
DLEU2	0.00410705	0.0180091	2.74388	1.15483	1.24853	Up
LOC440288	0.00707665	0.026283	6.0887	2.56386	1.24781	Up
CHRNA7	0.00126843	0.0082239	2.71181	1.14205	1.24763	Up
C21orf67	0.0151694	0.0456356	3.4977	1.47431	1.24637	Up
CXCR2	0.00918974	0.0316815	2.1981	0.926885	1.2458	Up
C3orf78	0.00231581	0.0121416	96.1958	40.5755	1.24537	Up
GNB4	0.0151694	0.0456356	75.3042	31.7668	1.24521	Up
HTATSF1P2	0.00309519	0.0147727	12.9353	5.45696	1.24514	Up
ABCA9	0.000348575	0.00411988	10.0572	4.24303	1.24507	Up
ENO1-AS1	0.000928533	0.00675394	5.91374	2.49521	1.24491	Up
OR51E2	0.00541053	0.0216298	3.88418	1.63899	1.24481	Up
LOC613037	0.00126843	0.0082239	54.2971	22.9174	1.24443	Up
GAMT	0.000348575	0.00411988	54.3442	22.9476	1.24378	Up
NASP	0.000348575	0.00411988	401.6	169.754	1.24232	Up
JMJD7-PLA2G4B	0.00172014	0.0100634	16.1581	6.83315	1.24164	Up
PLA2G4B	0.00172014	0.0100634	16.1581	6.83315	1.24164	Up
SLC5A6	0.000928533	0.00675394	90.4896	38.3342	1.23912	Up
GPHN	0.000348575	0.00411988	35.2455	14.9412	1.23814	Up
CHEK2P2	0.00541053	0.0216298	5.84746	2.47928	1.23789	Up
ARHGAP19	0.000928533	0.00675394	13.0373	5.52891	1.23757	Up
HMGB1	0.00309519	0.0147727	1740.46	738.195	1.2374	Up
F2RL3	0.0118489	0.0381369	4.18343	1.77461	1.23718	Up
LOC100506730	0.00541053	0.0216298	26.4439	11.2188	1.23701	Up
MRPL23	0.00231581	0.0121416	147.627	62.643	1.23673	Up
FLJ46361	0.00918974	0.0316815	1.98978	0.844452	1.23652	Up
COL13A1	0.00231581	0.0121416	68.2726	28.9884	1.23583	Up
NDUFB9	0.000348575	0.00411988	437.595	185.847	1.23548	Up
SPTLC3	0.00126843	0.0082239	22.2578	9.46066	1.2343	Up
MAPRE2	0.000348575	0.00411988	68.0313	28.9545	1.23241	Up
MCM2	0.000348575	0.00411988	167.512	71.3031	1.23223	Up
TIMM8B	0.000486766	0.00479912	159.995	68.1295	1.23167	Up
C8orf77	0.00541053	0.0216298	4.33977	1.84841	1.23133	Up
APRT	0.000348575	0.00411988	321.895	137.19	1.23042	Up
ATAD3A	0.000348575	0.00411988	88.8904	37.8851	1.2304	Up
LOC439949	0.00410705	0.0180091	22.8635	9.74554	1.23023	Up
ITM2C	0.000348575	0.00411988	491.422	209.512	1.22993	Up
TAF2	0.0151694	0.0456356	7.43361	3.17014	1.22952	Up
TRIM36	0.00541053	0.0216298	4.01123	1.71065	1.2295	Up
C17orf53	0.00231581	0.0121416	10.2339	4.36533	1.2292	Up
FLVCR1	0.00410705	0.0180091	10.9418	4.66888	1.2287	Up
TUBB8	0.000348575	0.00411988	12.4587	5.31838	1.2281	Up
ZNF462	0.00231581	0.0121416	34.8632	14.8889	1.22747	Up
ABTB2	0.00707665	0.026283	11.0733	4.73111	1.22684	Up
CNTRL	0.000674763	0.00557175	34.3101	14.6592	1.22683	Up
LINC00477	0.00707665	0.026283	3.72722	1.59252	1.22679	Up
LOC100134868	0.00309519	0.0147727	14.9193	6.37587	1.22649	Up
FEM1C	0.000928533	0.00675394	33.4253	14.2876	1.22618	Up
SIGLEC11	0.00410705	0.0180091	3.28791	1.40612	1.22545	Up
FAM55C	0.0151694	0.0456356	11.2875	4.82811	1.22519	Up
SNORA77	0.0118489	0.0381369	2.48278	1.06215	1.22496	Up
C16orf80	0.000486766	0.00479912	90.9036	38.9067	1.22432	Up
TMCC2	0.00231581	0.0121416	11.7979	5.05744	1.22205	Up
LOC152217	0.000348575	0.00411988	80.8312	34.6687	1.22128	Up
GFOD2	0.00410705	0.0180091	15.6707	6.72227	1.22104	Up
SMARCC1	0.000674763	0.00557175	87.3211	37.459	1.22102	Up
AGBL5	0.00172014	0.0100634	17.4954	7.5075	1.22057	Up
ANP32A	0.000348575	0.00411988	134.078	57.5491	1.2202	Up
OR7D2	0.00309519	0.0147727	5.08818	2.18642	1.21858	Up
CCT6P1	0.00126843	0.0082239	37.3681	16.0626	1.2181	Up
MTRNR2L6	0.00231581	0.0121416	890.981	383.154	1.21747	Up
CDC7	0.000348575	0.00411988	40.019	17.2098	1.21745	Up
SMARCA4	0.000348575	0.00411988	202.993	87.3022	1.21734	Up
MCM5	0.000674763	0.00557175	129.288	55.6296	1.21667	Up
LOC100505738	0.000928533	0.00675394	42.0824	18.1114	1.21632	Up
HSPC072	0.00231581	0.0121416	2.47749	1.06656	1.21591	Up
NUDT1	0.00918974	0.0316815	143.959	62.0026	1.21526	Up
TMEM108	0.00538664	0.0216298	6.87296	2.96056	1.21506	Up
TUBB4A	0.000348575	0.00411988	125.395	54.0316	1.2146	Up
FAM108B1	0.000348575	0.00411988	25.9284	11.1727	1.21455	Up
D2HGDH	0.00309519	0.0147727	23.2432	10.0157	1.21454	Up
POLR3K	0.000348575	0.00411988	103.853	44.7669	1.21404	Up
EXOSC7	0.00410705	0.0180091	39.4022	16.9857	1.21396	Up
PACSIN3	0.000348575	0.00411988	41.306	17.8077	1.21385	Up
AGSK1	0.000486766	0.00479912	10.6521	4.59274	1.21372	Up
PELP1	0.00172014	0.0100634	101.515	43.7867	1.21313	Up
FAM217B	0.00172014	0.0100634	10.7546	4.63935	1.21296	Up
TMEM177	0.0118489	0.0381369	15.9762	6.89195	1.21294	Up
ZNF692	0.000928533	0.00675394	18.9411	8.17645	1.21197	Up
VRK1	0.000928533	0.00675394	80.1198	34.5888	1.21185	Up
TIMELESS	0.000348575	0.00411988	78.7995	34.0514	1.21047	Up
LOC283335	0.000674763	0.00557175	6.05624	2.61711	1.21045	Up
MTRNR2L1	0.0118489	0.0381369	5864.42	2534.6	1.21023	Up
PRR7	0.000928533	0.00675394	38.0418	16.4542	1.20913	Up
THAP4	0.00309519	0.0147727	44.673	19.3253	1.20891	Up
SREBF2	0.000348575	0.00411988	188.916	81.7391	1.20865	Up
UBE2C	0.000674763	0.00557175	174.071	75.3286	1.2084	Up
LZIC	0.000348575	0.00411988	23.9456	10.3689	1.2075	Up
SMO	0.0118489	0.0381369	57.3407	24.836	1.20713	Up
TSN	0.000348575	0.00411988	60.7536	26.3417	1.20562	Up
SHISA8	0.000348575	0.00411988	190.116	82.4414	1.20544	Up
LOC100506334	0.00231581	0.0121416	2.84502	1.23462	1.20437	Up
SLC4A1	0.0151694	0.0456356	3.24112	1.40733	1.20353	Up
LDHB	0.000348575	0.00411988	1175.46	510.641	1.20285	Up
TMEM45B	0.00126843	0.0082239	3.40445	1.47908	1.20273	Up
SCNN1G	0.00707665	0.026283	7.54156	3.27671	1.20262	Up
RPS2	0.000486766	0.00479912	3668.72	1594.3	1.20235	Up
ZNF326	0.000348575	0.00411988	35.9175	15.6091	1.2023	Up
ATAD3C	0.0118489	0.0381369	9.07864	3.94768	1.20147	Up
EPB41	0.00126843	0.0082239	25.9463	11.2827	1.20141	Up
CYP1A2	0.0151694	0.0456356	5.37305	2.3373	1.2009	Up
CPSF1	0.000348575	0.00411988	61.3224	26.6915	1.20003	Up
RCC2	0.000348575	0.00411988	266.671	116.116	1.19949	Up
LRRC8B	0.00172014	0.0100634	9.89379	4.30987	1.19888	Up
ELAVL3	0.00126843	0.0082239	176.081	76.7074	1.19881	Up
AOC4	0.00309519	0.0147727	2.31287	1.00783	1.19843	Up
C20orf96	0.00172014	0.0100634	29.5319	12.8764	1.19754	Up
SPINLW1	0.00541053	0.0216298	5.51506	2.40535	1.19713	Up
PPAT	0.0118489	0.0381369	39.9482	17.4257	1.19692	Up
LSM7	0.000348575	0.00411988	931.199	406.363	1.19632	Up
TRAIP	0.00410705	0.0180091	17.9487	7.83361	1.19613	Up
AIRE	0.0118489	0.0381369	3.34081	1.45808	1.19613	Up
MTRNR2L10	0.00309519	0.0147727	766.368	334.922	1.19421	Up
MIR4647	0.00231581	0.0121416	29.2544	12.7873	1.19394	Up
WHSC1	0.00410705	0.0180091	11.268	4.92641	1.19362	Up
C2orf91	0.0151694	0.0456356	7.18954	3.14516	1.19277	Up
OTX1	0.0151694	0.0456356	5.33093	2.33244	1.19255	Up
SOX4	0.00541053	0.0216298	236.968	103.719	1.19201	Up
URB1	0.000486766	0.00479912	10.7849	4.72109	1.19182	Up
SNRPF	0.000486766	0.00479912	408.343	178.806	1.19139	Up
LOC344967	0.00541053	0.0216298	3.9703	1.7388	1.19116	Up
EIF2B5	0.000348575	0.00411988	45.1405	19.7924	1.18947	Up
FAM100A	0.00541053	0.0216298	22.7496	9.98137	1.18853	Up
LOC100131496	0.000674763	0.00557175	3.02805	1.33001	1.18695	Up
SMARCB1	0.000928533	0.00675394	159.98	70.2727	1.18686	Up
MSH5	0.00231581	0.0121416	11.2082	4.92392	1.18667	Up
PHF17	0.0118489	0.0381369	6.99632	3.07532	1.18586	Up
LOC100129387	0.000486766	0.00479912	31.6469	13.9117	1.18577	Up
ARMC5	0.00410705	0.0180091	17.205	7.56475	1.18546	Up
FARSA	0.00410705	0.0180091	61.1388	26.9106	1.18391	Up
OGDH	0.000348575	0.00411988	8.1827	3.60344	1.1832	Up
FAM72A	0.00309519	0.0147727	11.9642	5.26946	1.183	Up
AGRN	0.00918974	0.0316815	150.864	66.4635	1.18261	Up
TIMM13	0.000348575	0.00411988	226.611	99.8601	1.18224	Up
POLD1	0.00126843	0.0082239	64.3208	28.3466	1.18211	Up
ZNF687	0.00707665	0.026283	17.7478	7.82672	1.18116	Up
HMGN2	0.000348575	0.00411988	829.894	366.099	1.18069	Up
PYGO1	0.0118489	0.0381369	5.00019	2.20605	1.18052	Up
TELO2	0.00126843	0.0082239	55.4437	24.4741	1.17977	Up
C9orf23	0.0118489	0.0381369	28.2928	12.4946	1.17913	Up
ANKRD39	0.000348575	0.00411988	27.3038	12.0604	1.17883	Up
ACN9	0.00918974	0.0316815	62.7261	27.7111	1.1786	Up
GSTZ1	0.000348575	0.00411988	56.7862	25.0968	1.17804	Up
DDX49	0.0118489	0.0381369	60.038	26.5516	1.17708	Up
NT5C	0.000348575	0.00411988	103.254	45.6904	1.17624	Up
CDT1	0.000348575	0.00411988	55.7437	24.6675	1.1762	Up
DTYMK	0.000348575	0.00411988	193.155	85.4806	1.17609	Up
SLC6A10P	0.000674763	0.00557175	8.6361	3.82465	1.17505	Up
ZBP1	0.00707665	0.026283	9.81745	4.35001	1.17433	Up
ASB13	0.00172014	0.0100634	25.7066	11.3945	1.1738	Up
HIST2H2AB	0.00309519	0.0147727	1.8334	0.813283	1.17269	Up
RNF141	0.000348575	0.00411988	351.784	156.139	1.17186	Up
CLASRP	0.000674763	0.00557175	43.7868	19.4423	1.1713	Up
C2orf43	0.000348575	0.00411988	23.5688	10.4657	1.17121	Up
C11orf31	0.000348575	0.00411988	337.263	149.902	1.16985	Up
LOC283731	0.00918974	0.0316815	2.39203	1.06319	1.16983	Up
RCC1	0.00126843	0.0082239	76.1107	33.8326	1.16969	Up
LOC147727	0.000348575	0.00411988	130.21	57.9122	1.1689	Up
FSBP	0.00918974	0.0316815	18.6629	8.31233	1.16684	Up
QRICH2	0.000486766	0.00479912	6.23387	2.77912	1.1655	Up
DPY19L3	0.000348575	0.00411988	38.614	17.2166	1.16532	Up
NDUFAF3	0.000486766	0.00479912	152.32	67.9277	1.16503	Up
CCT6A	0.00126843	0.0082239	460.9	205.551	1.16496	Up
MAPK8IP3	0.000348575	0.00411988	44.8218	20.0008	1.16415	Up
LOC100505989	0.00707665	0.026283	4.06178	1.81251	1.16412	Up
TMEM68	0.00707665	0.026283	13.5564	6.04994	1.16398	Up
ATP5G2	0.000348575	0.00411988	677.514	302.416	1.16372	Up
ADSL	0.00172014	0.0100634	76.489	34.1496	1.16339	Up
PEX12	0.0118489	0.0381369	7.43095	3.31795	1.16326	Up
SNORD7	0.0118489	0.0381369	7.43095	3.31795	1.16326	Up
AIFM3	0.0151694	0.0456356	6.51791	2.91206	1.16237	Up
PRORSD1P	0.000674763	0.00557175	5.72818	2.55937	1.16229	Up
C9orf66	0.000928533	0.00675394	7.10777	3.17613	1.16213	Up
HNRNPU	0.000348575	0.00411988	66.818	29.8845	1.16084	Up
TRMU	0.0151694	0.0456356	22.942	10.2661	1.1601	Up
FTX	0.0151694	0.0456356	13.3185	5.96199	1.15957	Up
ARHGAP26	0.00918974	0.0316815	8.82961	3.95442	1.15888	Up
MIR4485	0.000348575	0.00411988	15.8758	7.11165	1.15857	Up
HMGN3	0.00410705	0.0180091	82.8276	37.1111	1.15826	Up
PABPC1L	0.00126843	0.0082239	17.9408	8.04119	1.15777	Up
MLST8	0.000348575	0.00411988	85.4918	38.3291	1.15734	Up
PINX1	0.00126843	0.0082239	54.5335	24.45	1.15731	Up
ALS2	0.00309519	0.0147727	3.84325	1.72404	1.15653	Up
DDX51	0.00231581	0.0121416	17.6779	7.93215	1.15616	Up
SNURF	0.00918974	0.0316815	16.4422	7.38135	1.15545	Up
ICAM4	0.0151694	0.0456356	2.66524	1.19658	1.15535	Up
RAX2	0.00231581	0.0121416	3.25699	1.46278	1.15483	Up
CTC1	0.00918974	0.0316815	5.91839	2.65853	1.15458	Up
GNPDA1	0.000348575	0.00411988	72.7488	32.7048	1.15342	Up
AARS2	0.00172014	0.0100634	17.3195	7.78712	1.15324	Up
CDK5RAP1	0.000348575	0.00411988	101.347	45.5924	1.15244	Up
RGS16	0.00707665	0.026283	22.4174	10.094	1.15111	Up
C12orf45	0.00126843	0.0082239	47.6173	21.4512	1.15043	Up
TARBP1	0.00126843	0.0082239	18.0964	8.1587	1.14929	Up
ZNF559	0.000674763	0.00557175	11.7123	5.28142	1.14902	Up
TOP1	0.000674763	0.00557175	319.652	144.164	1.14879	Up
REC8	0.0151694	0.0456356	56.5469	25.5048	1.14868	Up
CACYBP	0.000348575	0.00411988	214.494	96.8283	1.14743	Up
LOC100272217	0.00707665	0.026283	2.86593	1.2939	1.14727	Up
POGZ	0.00918974	0.0316815	52.3404	23.6634	1.14527	Up
GPR132	0.00918974	0.0316815	2.66728	1.20666	1.14435	Up
ZNF321P	0.000486766	0.00479912	6.45686	2.92517	1.14231	Up
ZNF816-ZNF321P	0.000486766	0.00479912	6.45686	2.92517	1.14231	Up
NCAPD2	0.000486766	0.00479912	71.8963	32.5724	1.14227	Up
C12orf76	0.00918974	0.0316815	14.0477	6.36605	1.14186	Up
POLDIP3	0.000348575	0.00411988	97.9869	44.4272	1.14114	Up
GSTA4	0.00918974	0.0316815	76.6346	34.7481	1.14106	Up
SPC25	0.000486766	0.00479912	43.8164	19.869	1.14095	Up
ZNF8	0.0151694	0.0456356	3.72042	1.68765	1.14044	Up
HDHD2	0.000348575	0.00411988	19.1861	8.70754	1.13972	Up
CD3G	0.00410705	0.0180091	4.89928	2.22384	1.13952	Up
HAUS5	0.00918974	0.0316815	21.8456	9.91764	1.13927	Up
MCM7	0.000348575	0.00411988	964.7	438.686	1.13689	Up
SUV420H2	0.00231581	0.0121416	25.4023	11.5523	1.13678	Up
TST	0.00231581	0.0121416	19.0805	8.67927	1.13645	Up
KATNB1	0.000486766	0.00479912	49.7355	22.6247	1.13638	Up
CPSF3	0.000348575	0.00411988	69.1156	31.4743	1.13484	Up
GPD1L	0.00541053	0.0216298	34.9146	15.9068	1.13419	Up
TRA2B	0.000348575	0.00411988	123.356	56.2113	1.1339	Up
KIAA0101	0.000486766	0.00479912	203.887	92.9216	1.13368	Up
FAM59A	0.00309519	0.0147727	3.48793	1.59019	1.13317	Up
CLN6	0.000348575	0.00411988	124.964	56.9795	1.133	Up
MAPK12	0.000928533	0.00675394	45.7266	20.8712	1.13152	Up
DERL3	0.000348575	0.00411988	63.6434	29.0541	1.13127	Up
CCDC122	0.00707665	0.026283	3.522	1.60828	1.13087	Up
RPS27	0.00410705	0.0180091	2378.22	1086.04	1.1308	Up
FRAT2	0.00707665	0.026283	10.4063	4.75381	1.1303	Up
BOLA2B	0.000348575	0.00411988	147.983	67.6177	1.12996	Up
MYBBP1A	0.00126843	0.0082239	24.2684	11.0942	1.12927	Up
NIPSNAP1	0.000348575	0.00411988	132.312	60.511	1.12868	Up
BOLA2	0.000348575	0.00411988	148.377	67.8877	1.12805	Up
ALS2CL	0.00410705	0.0180091	11.1656	5.10908	1.12792	Up
RPUSD2	0.00126843	0.0082239	11.9841	5.48772	1.12684	Up
SLC27A1	0.000674763	0.00557175	47.8244	21.9114	1.12607	Up
RRP1	0.00172014	0.0100634	76.5522	35.075	1.126	Up
LOC400604	0.00410705	0.0180091	4.37655	2.00549	1.12584	Up
LOC728066	0.000486766	0.00479912	118.288	54.2171	1.12549	Up
SMARCD1	0.000348575	0.00411988	123.428	56.6159	1.12439	Up
TOMM22	0.000486766	0.00479912	294.839	135.378	1.12293	Up
MAP3K9	0.00541053	0.0216298	2.94067	1.35037	1.12279	Up
FAM110B	0.000928533	0.00675394	43.6685	20.0538	1.12272	Up
LOC283070	0.00707665	0.026283	113.082	51.9458	1.12229	Up
SFMBT1	0.00172014	0.0100634	10.5633	4.85275	1.12218	Up
SPR	0.00410705	0.0180091	42.1427	19.379	1.12079	Up
SIRPA	0.00410705	0.0180091	42.0801	19.3604	1.12003	Up
NINJ1	0.0118489	0.0381369	145.907	67.1443	1.11971	Up
NCAPH	0.000928533	0.00675394	48.0437	22.1131	1.11945	Up
SFPQ	0.00309519	0.0147727	624.877	287.634	1.11934	Up
TTLL12	0.00126843	0.0082239	52.6801	24.2501	1.11927	Up
KCNJ5	0.00918974	0.0316815	1.35663	0.624753	1.11867	Up
CNGA1	0.00918974	0.0316815	1.92444	0.886279	1.11861	Up
TRO	0.000348575	0.00411988	57.8274	26.6368	1.11833	Up
WDR27	0.00918974	0.0316815	3.68498	1.69923	1.11677	Up
C12orf5	0.00918974	0.0316815	18.2391	8.41239	1.11645	Up
G6PC3	0.000486766	0.00479912	121.84	56.2064	1.11618	Up
LCORL	0.00918974	0.0316815	4.61137	2.12759	1.11597	Up
SOX12	0.000674763	0.00557175	543.136	250.644	1.11568	Up
PRPF19	0.0118489	0.0381369	149.185	68.8684	1.11519	Up
PMS1	0.000928533	0.00675394	21.2084	9.79214	1.11494	Up
CEP72	0.00231581	0.0121416	10.0088	4.62178	1.11475	Up
NFATC3	0.000674763	0.00557175	34.9185	16.1245	1.11474	Up
VARS2	0.0118489	0.0381369	21.7766	10.0607	1.11405	Up
DHCR24	0.000348575	0.00411988	222.521	102.859	1.11328	Up
GK3P	0.00541053	0.0216298	2.49804	1.15481	1.11314	Up
GCDH	0.000486766	0.00479912	21.4267	9.92151	1.11078	Up
RBM14	0.000348575	0.00411988	213.273	98.7699	1.11056	Up
LOC100270804	0.0151694	0.0456356	6.37265	2.95372	1.10936	Up
CCDC97	0.000928533	0.00675394	20.5695	9.54358	1.1079	Up
LOC100132247	0.00172014	0.0100634	100.377	46.618	1.10647	Up
USP24	0.00231581	0.0121416	10.245	4.75926	1.10612	Up
WWOX	0.00541053	0.0216298	8.77513	4.07664	1.10604	Up
SNTB1	0.00309519	0.0147727	23.4598	10.9081	1.10479	Up
DBF4	0.000674763	0.00557175	51.6384	24.0143	1.10455	Up
DCPS	0.000348575	0.00411988	33.9387	15.7936	1.1036	Up
MRPS7	0.000348575	0.00411988	114.53	53.3271	1.10279	Up
SRSF7	0.000674763	0.00557175	203.153	94.618	1.10238	Up
AIFM1	0.000348575	0.00411988	65.7736	30.643	1.10195	Up
FAM133B	0.000486766	0.00479912	112.829	52.5985	1.10105	Up
RBM10	0.000674763	0.00557175	81.4366	37.9705	1.1008	Up
PHB	0.000348575	0.00411988	321.74	150.042	1.10053	Up
ZNF546	0.0118489	0.0381369	3.66485	1.7091	1.10052	Up
MARS2	0.0151694	0.0456356	9.94774	4.64085	1.09998	Up
CELF3	0.00918974	0.0316815	2.11283	0.985727	1.09992	Up
SGSM3	0.00707665	0.026283	44.9048	20.9725	1.09837	Up
C16orf54	0.00126843	0.0082239	8.67137	4.05047	1.09817	Up
KIAA1656	0.00541053	0.0216298	2.46007	1.14958	1.0976	Up
EEPD1	0.00904611	0.0316815	8.88835	4.15449	1.09724	Up
FBXW7	0.00126843	0.0082239	18.6121	8.70146	1.09691	Up
TRIM33	0.00410705	0.0180091	13.4831	6.30567	1.09643	Up
FLJ37453	0.00231581	0.0121416	47.2807	22.1343	1.09497	Up
TRIM58	0.0118489	0.0381369	7.46388	3.4956	1.09439	Up
TAF6L	0.000348575	0.00411988	23.885	11.2062	1.09181	Up
CDK10	0.00541053	0.0216298	62.58	29.364	1.09165	Up
PDE7A	0.00126843	0.0082239	5.27532	2.47543	1.09158	Up
CDK4	0.000348575	0.00411988	336.125	157.739	1.09146	Up
UBQLN4	0.000348575	0.00411988	61.5947	28.9253	1.09047	Up
PBOV1	0.00707665	0.026283	3.45096	1.62075	1.09034	Up
THYN1	0.000348575	0.00411988	59.6765	28.0361	1.08988	Up
MIS18A	0.000928533	0.00675394	59.9388	28.1839	1.08862	Up
CCDC34	0.000674763	0.00557175	72.9655	34.3114	1.08853	Up
SRBD1	0.00126843	0.0082239	22.1782	10.4295	1.08847	Up
CDC45	0.000348575	0.00411988	80.7435	37.9904	1.08771	Up
DDX39A	0.000486766	0.00479912	172.606	81.222	1.08754	Up
ACADM	0.00126843	0.0082239	24.1984	11.3885	1.08733	Up
ZBTB20	0.0118489	0.0381369	10.0415	4.72636	1.08717	Up
H2AFX	0.000348575	0.00411988	440.143	207.19	1.08702	Up
LOC100190940	0.00707665	0.026283	2.00362	0.943832	1.08601	Up
PA2G4P4	0.00126843	0.0082239	202.887	95.6365	1.08504	Up
NSUN4	0.00707665	0.026283	13.2114	6.22985	1.08452	Up
LSR	0.00126843	0.0082239	14.7886	6.97552	1.08412	Up
CD320	0.000348575	0.00411988	273.374	128.967	1.08388	Up
BUB1	0.000486766	0.00479912	45.4298	21.4338	1.08375	Up
IMP4	0.000674763	0.00557175	63.7122	30.0629	1.08359	Up
MGST3	0.00918974	0.0316815	701.801	331.162	1.08352	Up
LOC729609	0.00541053	0.0216298	7.73206	3.65091	1.0826	Up
ANKHD1	0.00707665	0.026283	6.3739	3.01084	1.08201	Up
COX8A	0.00126843	0.0082239	550.845	260.217	1.08193	Up
SEMA4C	0.000486766	0.00479912	33.6729	15.9153	1.08117	Up
MAD2L1	0.000928533	0.00675394	60.2783	28.4937	1.081	Up
PACSIN2	0.000674763	0.00557175	109.992	51.9946	1.08097	Up
OTUB1	0.000348575	0.00411988	91.7552	43.382	1.08069	Up
WDR31	0.000674763	0.00557175	4.64623	2.1969	1.08059	Up
TIPIN	0.00172014	0.0100634	26.5189	12.5484	1.07951	Up
FABP2	0.0151694	0.0456356	3.43829	1.62711	1.07938	Up
C8orf33	0.000348575	0.00411988	59.7339	28.2689	1.07933	Up
NPIPL3	0.00126843	0.0082239	100.275	47.4555	1.07932	Up
CSTF3	0.000348575	0.00411988	20.9654	9.93199	1.07785	Up
LOC100130557	0.00707665	0.026283	4.52916	2.14573	1.07778	Up
TXNL4B	0.00541053	0.0216298	13.01	6.16502	1.07745	Up
DPH5	0.00126843	0.0082239	14.676	6.95567	1.07719	Up
RPL8	0.000348575	0.00411988	2312.85	1096.19	1.07717	Up
NHEJ1	0.00231581	0.0121416	21.5996	10.2433	1.07633	Up
CCDC106	0.000674763	0.00557175	47.1622	22.3664	1.0763	Up
NMB	0.00410705	0.0180091	21.578	10.2362	1.07589	Up
NDUFAB1	0.000348575	0.00411988	218.129	103.505	1.07549	Up
TMEM194B	0.00410705	0.0180091	4.95135	2.3495	1.07547	Up
ATP2A1	0.0151694	0.0456356	18.5612	8.81917	1.07358	Up
POLE3	0.000348575	0.00411988	123.614	58.7349	1.07355	Up
NCRUPAR	0.0118489	0.0381369	4.8126	2.28828	1.07255	Up
PMF1	0.00231581	0.0121416	91.1186	43.3438	1.07192	Up
ASIC1	0.0118489	0.0381369	12.5403	5.96928	1.07094	Up
C4orf48	0.00309519	0.0147727	78.4158	37.3305	1.07079	Up
MRPL12	0.000348575	0.00411988	195.814	93.2687	1.07002	Up
SNX4	0.000486766	0.00479912	24.024	11.4449	1.06977	Up
TMEFF1	0.00918974	0.0316815	11.1109	5.29813	1.06841	Up
LOC728643	0.00410705	0.0180091	85.7777	40.925	1.06762	Up
HSD17B13	0.00707665	0.026283	4.93025	2.35356	1.06681	Up
PDXP	0.000348575	0.00411988	132.093	63.0764	1.06638	Up
PCDH11Y	0.00541053	0.0216298	2.20317	1.05319	1.06481	Up
SET	0.00707665	0.026283	1275.25	609.617	1.06481	Up
PPAN	0.000486766	0.00479912	70.7846	33.853	1.06415	Up
FKBP4	0.000674763	0.00557175	195.592	93.5495	1.06404	Up
GTF3C5	0.000674763	0.00557175	105.746	50.5825	1.06389	Up
CHRFAM7A	0.00707665	0.026283	4.4081	2.10898	1.06361	Up
CAMK2B	0.00126843	0.0082239	11.2219	5.36943	1.06347	Up
WHSC2	0.000348575	0.00411988	31.3173	14.9931	1.06266	Up
SRSF11	0.0151694	0.0456356	165.99	79.4825	1.06239	Up
SPG7	0.00410705	0.0180091	16.9598	8.12258	1.06211	Up
RUVBL1	0.000348575	0.00411988	142.678	68.3373	1.06202	Up
DDX56	0.000928533	0.00675394	115.216	55.1844	1.06201	Up
PHYHD1	0.00707665	0.026283	3.61892	1.73366	1.06174	Up
KIF9	0.0118489	0.0381369	25.0547	12.0092	1.06093	Up
PPCDC	0.00541053	0.0216298	14.3838	6.89452	1.06092	Up
MCCC1	0.000486766	0.00479912	37.5716	18.0231	1.0598	Up
AASS	0.00126843	0.0082239	38.0338	18.2455	1.05974	Up
HSP90AB4P	0.00707665	0.026283	9.73286	4.67192	1.05885	Up
CPSF4	0.0118489	0.0381369	50.178	24.1149	1.05713	Up
SERBP1	0.000486766	0.00479912	49.78	23.9389	1.05621	Up
NME4	0.00707665	0.026283	259.69	124.885	1.05619	Up
ILKAP	0.000928533	0.00675394	76.5026	36.8015	1.05574	Up
NSUN6	0.00309519	0.0147727	12.8544	6.18383	1.05568	Up
PDHA1	0.00707665	0.026283	52.496	25.263	1.05518	Up
SNHG1	0.000348575	0.00411988	217.475	104.685	1.05479	Up
LOC389634	0.000928533	0.00675394	9.80986	4.72379	1.05429	Up
DYNC1LI1	0.000928533	0.00675394	32.3995	15.6016	1.05428	Up
ZNF26	0.00918974	0.0316815	4.50002	2.16748	1.05391	Up
DCD	0.00410705	0.0180091	470.429	226.781	1.05268	Up
ZSCAN4	0.00541053	0.0216298	4.32708	2.08613	1.05257	Up
CDH1	0.0118489	0.0381369	3.19531	1.54098	1.05211	Up
TDG	0.00126843	0.0082239	49.6674	23.9537	1.05205	Up
LOC100272216	0.0151694	0.0456356	2.14874	1.03653	1.05173	Up
ZNF710	0.00172014	0.0100634	17.3498	8.37032	1.05157	Up
KIAA1377	0.00707665	0.026283	6.00383	2.89835	1.05065	Up
CCDC12	0.000348575	0.00411988	79.5341	38.3978	1.05055	Up
MMP17	0.0118489	0.0381369	38.7324	18.7037	1.05022	Up
ZFAT	0.00918974	0.0316815	4.6162	2.22924	1.05015	Up
LOC285084	0.00707665	0.026283	10.1894	4.92829	1.04791	Up
C1orf159	0.00172014	0.0100634	24.8121	12.0079	1.04706	Up
ARHGAP33	0.000348575	0.00411988	48.3847	23.4352	1.04587	Up
ATP6V1B1	0.0151694	0.0456356	9.30404	4.50951	1.04489	Up
CDC6	0.00126843	0.0082239	27.9976	13.5723	1.04464	Up
GET4	0.00172014	0.0100634	45.8371	22.225	1.04433	Up
C7orf55	0.00231581	0.0121416	209.988	101.827	1.04418	Up
LRP6	0.000348575	0.00411988	29.2218	14.1704	1.04417	Up
CBS	0.0151694	0.0456356	265.661	128.859	1.04379	Up
CCT6P3	0.00918974	0.0316815	34.2186	16.5997	1.04362	Up
IDH1	0.0118489	0.0381369	248.892	120.861	1.04217	Up
HLA-DOA	0.00231581	0.0121416	5.08842	2.47216	1.04144	Up
CHCHD10	0.00918974	0.0316815	100.809	48.9912	1.04104	Up
FBXL19	0.000928533	0.00675394	20.0973	9.76723	1.04098	Up
ProSAPiP1	0.000674763	0.00557175	21.6028	10.5004	1.04077	Up
FLJ44511	0.00410705	0.0180091	4.5153	2.19525	1.04043	Up
TRABD	0.000486766	0.00479912	64.7653	31.4904	1.04031	Up
GSTTP1	0.00707665	0.026283	20.7119	10.0782	1.03922	Up
GPATCH4	0.000486766	0.00479912	88.0382	42.8478	1.03891	Up
LRRC20	0.0151694	0.0456356	22.7404	11.0678	1.0389	Up
PTRHD1	0.000486766	0.00479912	94.9703	46.2316	1.0386	Up
RBFA	0.0118489	0.0381369	3.56393	1.73524	1.03834	Up
EXOSC10	0.000348575	0.00411988	87.4356	42.5725	1.0383	Up
TMEM87A	0.0151694	0.0456356	3.32628	1.62079	1.03722	Up
ZC3H8	0.00918974	0.0316815	14.7982	7.21618	1.03612	Up
KLF4	0.00172014	0.0100634	37.0367	18.0606	1.03612	Up
FLAD1	0.00707665	0.026283	24.0314	11.72	1.03595	Up
PMF1-BGLAP	0.00231581	0.0121416	16.8708	8.2288	1.03578	Up
POLR1B	0.00309519	0.0147727	13.8031	6.73635	1.03495	Up
FAM13A-AS1	0.00918974	0.0316815	593.126	289.589	1.03433	Up
MRTO4	0.000348575	0.00411988	74.2818	36.2921	1.03335	Up
SLC35G3	0.00410705	0.0180091	3.74419	1.82968	1.03306	Up
CNNM3	0.00231581	0.0121416	18.2934	8.94208	1.03264	Up
PUF60	0.000348575	0.00411988	250.155	122.302	1.03238	Up
ZNF433	0.000486766	0.00479912	7.63058	3.73081	1.0323	Up
PIDD	0.0118489	0.0381369	24.2308	11.8635	1.03032	Up
CDH19	0.0118489	0.0381369	17.8533	8.74346	1.02991	Up
DCP2	0.000928533	0.00675394	25.8439	12.6591	1.02965	Up
UBE2T	0.000928533	0.00675394	315.709	154.891	1.02734	Up
LOC100527964	0.0151694	0.0456356	4.75825	2.33503	1.02699	Up
UPF3A	0.0151694	0.0456356	60.7106	29.8061	1.02634	Up
MICAL3	0.0151694	0.0456356	12.1203	5.95243	1.02587	Up
CHCHD2	0.000674763	0.00557175	938.75	461.04	1.02585	Up
PMPCA	0.00541053	0.0216298	176.876	86.8729	1.02576	Up
NUDT3	0.00309519	0.0147727	157.651	77.4414	1.02556	Up
FBL	0.0118489	0.0381369	347.829	170.91	1.02514	Up
HNRNPD	0.000486766	0.00479912	547.49	269.052	1.02494	Up
REPIN1	0.00707665	0.026283	128.575	63.1912	1.02481	Up
PXMP2	0.00309519	0.0147727	67.6879	33.3076	1.02305	Up
OIP5	0.000674763	0.00557175	34.7418	17.1007	1.02261	Up
CCDC18	0.000486766	0.00479912	9.4865	4.67245	1.0217	Up
EXOSC4	0.000928533	0.00675394	92.0369	45.34	1.02143	Up
LIG1	0.000348575	0.00411988	74.3877	36.6596	1.02087	Up
ASTN2	0.00410705	0.0180091	11.4902	5.66342	1.02065	Up
TLE1	0.00309519	0.0147727	51.2594	25.2788	1.01989	Up
LOC100506046	0.0151694	0.0456356	29.5184	14.5595	1.01965	Up
FAM107A	0.0118489	0.0381369	14.5259	7.16785	1.01902	Up
UTP18	0.00309519	0.0147727	42.0972	20.7733	1.01899	Up
KANK1	0.000486766	0.00479912	83.1656	41.0471	1.01871	Up
DMC1	0.0118489	0.0381369	5.13602	2.53496	1.01869	Up
HEMK1	0.0118489	0.0381369	5.7236	2.82537	1.01848	Up
ZNF607	0.000674763	0.00557175	33.941	16.7617	1.01786	Up
TUBA1A	0.00172014	0.0100634	3969.19	1960.42	1.01768	Up
ARMC6	0.000486766	0.00479912	67.6483	33.4188	1.01739	Up
CAPN10	0.000928533	0.00675394	23.9229	11.8188	1.0173	Up
EPS15L1	0.00410705	0.0180091	18.2733	9.02981	1.01697	Up
NME1	0.000348575	0.00411988	731.317	361.387	1.01695	Up
LOC100130581	0.00541053	0.0216298	4.40164	2.17613	1.01628	Up
LOC649330	0.00541053	0.0216298	65.1483	32.2131	1.01608	Up
FAM173A	0.000348575	0.00411988	92.432	45.7413	1.01489	Up
PAN2	0.000674763	0.00557175	43.5012	21.54	1.01404	Up
LOC100131257	0.00410705	0.0180091	6.49453	3.2172	1.01342	Up
SNRPA1	0.00541053	0.0216298	191.008	94.6651	1.01273	Up
POP1	0.000928533	0.00675394	13.7627	6.82183	1.01254	Up
MPDU1	0.00231581	0.0121416	114.967	57.0178	1.01173	Up
WDR35	0.000486766	0.00479912	16.1882	8.03316	1.0109	Up
CDC14B	0.00309519	0.0147727	22.6597	11.2456	1.01077	Up
POLG2	0.00918974	0.0316815	5.95877	2.95879	1.01001	Up
MAGEF1	0.000348575	0.00411988	183.641	91.2274	1.00935	Up
RAD51AP1	0.00231581	0.0121416	11.0676	5.49979	1.00889	Up
SNAPC4	0.00309519	0.0147727	18.0589	8.98712	1.00678	Up
TOP1P2	0.000348575	0.00411988	30.5756	15.2208	1.00633	Up
TNFAIP6	0.0151694	0.0456356	33.5537	16.7082	1.00592	Up
C19orf73	0.00541053	0.0216298	11.9248	5.9381	1.00589	Up
WDR62	0.00231581	0.0121416	24.6949	12.3045	1.00502	Up
RAD51	0.000486766	0.00479912	32.2188	16.0677	1.00374	Up
MTSS1L	0.00707665	0.026283	54.4368	27.1595	1.00313	Up
FBXL6	0.000674763	0.00557175	20.1078	10.0374	1.00237	Up
ABHD11	0.0151694	0.0456356	24.6179	12.2923	1.00196	Up
ATP1A1	0.00410705	0.0180091	254.662	127.22	1.00125	Up
DISC2	0.00126843	0.0082239	8.82665	4.41141	1.00063	Up
C16orf13	0.000348575	0.00411988	153.068	76.6112	0.998542	Up
SPTLC1	0.00309519	0.0147727	10.5733	5.29407	0.997982	Up
PSRC1	0.00410705	0.0180091	99.1769	49.6712	0.997595	Up
LOC646471	0.00410705	0.0180091	5.13921	2.57603	0.996398	Up
SLC25A11	0.000674763	0.00557175	84.6399	42.4652	0.995058	Up
TFAP4	0.00541053	0.0216298	44.858	22.515	0.994477	Up
SARM1	0.00309519	0.0147727	33.2303	16.6795	0.994422	Up
KIF22	0.00172014	0.0100634	134.964	67.7519	0.994237	Up
C22orf32	0.000674763	0.00557175	108.952	54.7066	0.993906	Up
TBRG4	0.000348575	0.00411988	111.619	56.0595	0.993555	Up
SNRPN	0.00707665	0.026283	111.173	55.8379	0.993492	Up
TRAPPC2L	0.000348575	0.00411988	66.3265	33.3258	0.992945	Up
RFC2	0.000348575	0.00411988	85.9016	43.1656	0.992805	Up
ZRSR2	0.00918974	0.0316815	16.404	8.24463	0.992525	Up
ING1	0.0118489	0.0381369	12.6165	6.34217	0.992264	Up
LOC100507331	0.00309519	0.0147727	3.43411	1.72755	0.991203	Up
DCTPP1	0.000928533	0.00675394	171.396	86.2285	0.991093	Up
ZNF280C	0.00707665	0.026283	8.24103	4.14655	0.990915	Up
PPIG	0.00541053	0.0216298	165.154	83.0985	0.990913	Up
PCBP4	0.000348575	0.00411988	165.176	83.1207	0.990724	Up
LOC389791	0.00410705	0.0180091	10.113	5.08987	0.990514	Up
ZNF101	0.00541053	0.0216298	3.62271	1.82386	0.990076	Up
PC	0.00309519	0.0147727	25.7384	12.963	0.989524	Up
KIAA0195	0.000674763	0.00557175	64.8484	32.6622	0.989448	Up
FASTKD5	0.00309519	0.0147727	23.6988	11.9422	0.988742	Up
ARNT2	0.000348575	0.00411988	83.0208	41.8612	0.987859	Up
CADM1	0.00126843	0.0082239	51.6	26.0295	0.987221	Up
SIK3	0.00410705	0.0180091	45.9736	23.192	0.987179	Up
HCFC1	0.000928533	0.00675394	50.7237	25.6025	0.986374	Up
RUSC1-AS1	0.0118489	0.0381369	138.976	70.1611	0.986093	Up
CCT3	0.00126843	0.0082239	551.095	278.257	0.985884	Up
FLJ39639	0.00918974	0.0316815	1.74464	0.881383	0.985092	Up
FAM100B	0.000348575	0.00411988	117.095	59.1654	0.984851	Up
FAM83E	0.00309519	0.0147727	7.61143	3.84649	0.984625	Up
LIPE	0.00918974	0.0316815	8.65557	4.37715	0.983638	Up
SYNPO2	0.00410705	0.0180091	1.91134	0.967531	0.982203	Up
BGLAP	0.000928533	0.00675394	7.70646	3.90114	0.982172	Up
LOC728640	0.00707665	0.026283	59.2903	30.0219	0.981783	Up
RPL23AP32	0.000348575	0.00411988	219.089	110.948	0.981633	Up
C21orf119	0.0151694	0.0456356	16.1659	8.18729	0.981495	Up
AGTPBP1	0.000348575	0.00411988	11.9262	6.04293	0.980815	Up
USP46	0.00410705	0.0180091	3.63448	1.84266	0.979958	Up
LYPLA1	0.00309519	0.0147727	48.3471	24.5301	0.978876	Up
ALKBH2	0.00126843	0.0082239	30.1858	15.3193	0.978521	Up
EHMT2	0.00918974	0.0316815	57.185	29.0226	0.978459	Up
TCEANC2	0.00410705	0.0180091	8.58508	4.36302	0.976504	Up
RPL37A	0.000486766	0.00479912	3505.54	1783.25	0.975124	Up
LILRB3	0.00707665	0.026283	9.9058	5.04004	0.974838	Up
FLJ43390	0.00707665	0.026283	35.1191	17.8688	0.974814	Up
SLC25A35	0.0151694	0.0456356	6.00091	3.05331	0.974806	Up
CLK2P	0.0118489	0.0381369	5.05881	2.57547	0.97396	Up
HOXA5	0.00707665	0.026283	37.966	19.331	0.973787	Up
HNRNPCL1	0.00541053	0.0216298	49.6912	25.3194	0.972745	Up
NDUFA10	0.00541053	0.0216298	7.40969	3.77808	0.97176	Up
GFER	0.000486766	0.00479912	25.8869	13.2004	0.971639	Up
SLC25A10	0.000348575	0.00411988	45.2469	23.0851	0.970859	Up
YRDC	0.000928533	0.00675394	36.6557	18.7048	0.970626	Up
CHCHD5	0.00918974	0.0316815	74.0946	37.8101	0.970598	Up
C16orf87	0.00172014	0.0100634	48.9343	24.978	0.970186	Up
SAR1B	0.00541053	0.0216298	9.9278	5.06859	0.96989	Up
AAAS	0.000348575	0.00411988	69.101	35.2869	0.969571	Up
CHCHD4	0.00172014	0.0100634	19.8844	10.1604	0.968685	Up
C20orf7	0.00541053	0.0216298	26.8492	13.7219	0.968401	Up
CKS1B	0.00918974	0.0316815	230.774	117.967	0.968095	Up
LOC146880	0.000486766	0.00479912	4.86913	2.49045	0.96726	Up
ZMYND8	0.00309519	0.0147727	67.5197	34.5406	0.967014	Up
KNTC1	0.000674763	0.00557175	25.9918	13.3039	0.966203	Up
PSMB4	0.000486766	0.00479912	280.931	143.821	0.965944	Up
MT1IP	0.00309519	0.0147727	11.12	5.69371	0.965717	Up
CEP95	0.000674763	0.00557175	33.0481	16.9233	0.96555	Up
KHSRP	0.000486766	0.00479912	321.952	164.891	0.965329	Up
NSDHL	0.00918974	0.0316815	44.7844	22.9492	0.964553	Up
GPR83	0.0118489	0.0381369	2.27802	1.16746	0.96441	Up
GSTP1	0.000348575	0.00411988	738.692	378.629	0.96419	Up
SLC16A1	0.0118489	0.0381369	99.1987	50.8542	0.963956	Up
IQCF3	0.00231581	0.0121416	2.40083	1.23107	0.963616	Up
SETMAR	0.00410705	0.0180091	25.1827	12.9143	0.963465	Up
TMEM117	0.00707665	0.026283	7.45226	3.82232	0.96323	Up
BMS1P1	0.00707665	0.026283	3.25081	1.66767	0.962971	Up
TOP1P1	0.000348575	0.00411988	40.3985	20.7352	0.962221	Up
LOC100134368	0.00918974	0.0316815	6.89095	3.53811	0.961724	Up
UPK3B	0.00707665	0.026283	4.90305	2.51762	0.961617	Up
HEATR2	0.000348575	0.00411988	52.3857	26.8998	0.961578	Up
ATRIP	0.00707665	0.026283	15.7018	8.07218	0.959899	Up
LEP	0.00231581	0.0121416	7.85428	4.03819	0.959772	Up
MLF1	0.00231581	0.0121416	15.5939	8.01764	0.959733	Up
LOC150381	0.000486766	0.00479912	47.3692	24.3582	0.95954	Up
MDH2	0.000348575	0.00411988	441.545	227.24	0.958342	Up
HYAL2	0.00172014	0.0100634	80.9318	41.6533	0.958275	Up
IGFLR1	0.000928533	0.00675394	16.2135	8.35477	0.956525	Up
C20orf112	0.00309519	0.0147727	14.3458	7.39774	0.955468	Up
MRPS18A	0.00410705	0.0180091	99.5015	51.311	0.955449	Up
DNAJC2	0.00541053	0.0216298	99.8427	51.5127	0.954729	Up
KLHDC4	0.00541053	0.0216298	18.0421	9.31115	0.954337	Up
SLC24A4	0.00309519	0.0147727	15.1167	7.80772	0.953171	Up
LINC00167	0.000928533	0.00675394	5.04929	2.60802	0.953128	Up
LOC100128288	0.00541053	0.0216298	5.15387	2.66269	0.952775	Up
PHF5A	0.00707665	0.026283	41.8161	21.6407	0.950315	Up
RPL17	0.000928533	0.00675394	1606.09	831.937	0.949005	Up
IDH2	0.000674763	0.00557175	178.32	92.3773	0.94886	Up
URI1	0.00309519	0.0147727	62.7497	32.5117	0.948647	Up
ACACA	0.0151694	0.0456356	37.8468	19.6199	0.947849	Up
PQBP1	0.00707665	0.026283	44.5538	23.1052	0.94733	Up
ST8SIA1	0.00541053	0.0216298	12.6224	6.54656	0.947175	Up
SURF2	0.000486766	0.00479912	60.6618	31.4675	0.946929	Up
FABP1	0.00541053	0.0216298	4.81976	2.50031	0.946856	Up
MKI67IP	0.00172014	0.0100634	48.9024	25.3715	0.946697	Up
PSMD3	0.000928533	0.00675394	213.996	111.047	0.946417	Up
C20orf27	0.00410705	0.0180091	146.367	75.9702	0.94608	Up
SNHG10	0.000674763	0.00557175	15.6227	8.11776	0.944486	Up
LIN9	0.00918974	0.0316815	4.18424	2.17433	0.944394	Up
CENPA	0.00126843	0.0082239	19.9276	10.3583	0.943977	Up
MRPL38	0.00172014	0.0100634	80.4052	41.8009	0.943756	Up
POLR2D	0.000348575	0.00411988	47.8928	24.9181	0.942618	Up
LOC100128675	0.000928533	0.00675394	2.15468	1.12112	0.942534	Up
AASDHPPT	0.00126843	0.0082239	79.3176	41.2822	0.942121	Up
GTPBP6	0.00707665	0.026283	25.0734	13.0592	0.941095	Up
SNHG6	0.000348575	0.00411988	287.174	149.604	0.940777	Up
NUDT14	0.00410705	0.0180091	20.4391	10.6493	0.940573	Up
ENOPH1	0.00309519	0.0147727	29.8192	15.5384	0.940409	Up
TADA1	0.00172014	0.0100634	13.2683	6.91472	0.940242	Up
TCF12	0.00541053	0.0216298	84.4913	44.0579	0.939402	Up
CHST10	0.0118489	0.0381369	21.0914	10.9986	0.939333	Up
FAM92A3	0.00231581	0.0121416	12.1662	6.34511	0.939159	Up
DIS3L2	0.000486766	0.00479912	17.2039	8.97732	0.938376	Up
ACOT7	0.000486766	0.00479912	187.117	97.6441	0.938336	Up
RAVER1	0.00309519	0.0147727	132.014	68.9091	0.937926	Up
FADS2	0.0151694	0.0456356	668.8	349.207	0.937491	Up
LOC100506409	0.0118489	0.0381369	2.27622	1.18929	0.936537	Up
RPIA	0.00126843	0.0082239	49.2612	25.7404	0.936416	Up
TOMM20	0.000674763	0.00557175	140.844	73.5977	0.936361	Up
SS18L2	0.000928533	0.00675394	39.9213	20.8668	0.935947	Up
ABHD14A	0.00918974	0.0316815	25.3338	13.2487	0.935207	Up
TET3	0.00918974	0.0316815	6.66272	3.48541	0.934783	Up
NKTR	0.000674763	0.00557175	42.3465	22.1644	0.933999	Up
PLCG1	0.000674763	0.00557175	74.3943	38.9431	0.933826	Up
EXOSC5	0.0151694	0.0456356	55.8152	29.2316	0.93313	Up
C17orf89	0.00410705	0.0180091	230.382	120.672	0.932934	Up
TMEM200B	0.00309519	0.0147727	22.6545	11.8679	0.932733	Up
RPL5	0.00410705	0.0180091	1149.58	602.245	0.932688	Up
DMAP1	0.000674763	0.00557175	25.9938	13.6185	0.9326	Up
PCYT2	0.0118489	0.0381369	38.6864	20.2838	0.931496	Up
TRUB2	0.000348575	0.00411988	94.1361	49.3582	0.931458	Up
RPS7	0.00231581	0.0121416	2500.46	1311.46	0.93102	Up
AFG3L1P	0.00231581	0.0121416	11.2303	5.89236	0.930476	Up
ZNF99	0.00918974	0.0316815	11.9128	6.25081	0.930397	Up
CSK	0.000928533	0.00675394	133.096	69.8788	0.929541	Up
NOP16	0.00918974	0.0316815	62.84	32.9982	0.929295	Up
DNAJC27-AS1	0.00707665	0.026283	1.98111	1.04057	0.928927	Up
PA2G4	0.000486766	0.00479912	541.246	284.322	0.928758	Up
C7orf41	0.00231581	0.0121416	29.2201	15.3555	0.928205	Up
C3orf74	0.00707665	0.026283	3.584	1.8836	0.928075	Up
CCDC9	0.00231581	0.0121416	9.64361	5.0726	0.926848	Up
OXNAD1	0.00231581	0.0121416	10.1938	5.36286	0.926615	Up
LUC7L	0.000486766	0.00479912	51.8231	27.2674	0.926421	Up
PPIF	0.000674763	0.00557175	59.6265	31.3783	0.926185	Up
ILF3	0.000348575	0.00411988	80.6658	42.4574	0.925941	Up
RPL11	0.0118489	0.0381369	1509.58	794.647	0.925763	Up
LOC254128	0.00309519	0.0147727	6.99712	3.68387	0.925539	Up
FOXD2	0.00410705	0.0180091	32.7276	17.2311	0.925494	Up
CHCHD6	0.000928533	0.00675394	56.4387	29.7177	0.925361	Up
SRRM2	0.000486766	0.00479912	257.891	135.842	0.924836	Up
WDR18	0.00172014	0.0100634	62.2997	32.8185	0.924717	Up
NPDC1	0.00918974	0.0316815	141.037	74.3384	0.92389	Up
[truncated: 2,886 more rows]
