# Supplementary material for: Differentiated glioma cell-derived fibromodulin activates integrin-dependent Notch signaling in endothelial cells to promote tumor angiogenesis and growth
Source: eLife journal article supplement (doi:10.7554/elife.78972), 2022-06-01
Supplement: fig1-data11 [file TGF Beta Hallmark gene Set.xlsx]

## Sheet: HALLMARK_TGF_BETA_SIGNALING.v7.
/MSIGDB
/@BUILD_DATE	/@NAME	/@VERSION	/GENESET/@AUTHORS	/GENESET/@CATEGORY_CODE	/GENESET/@CHIP	/GENESET/@CONTRIBUTOR	/GENESET/@CONTRIBUTOR_ORG	/GENESET/@DESCRIPTION_BRIEF	/GENESET/@DESCRIPTION_FULL	/GENESET/@EXACT_SOURCE	/GENESET/@EXTERNAL_DETAILS_URL	/GENESET/@FILTERED_BY_SIMILARITY	/GENESET/@FOUNDER_NAMES	/GENESET/@GENESET_LISTING_URL	/GENESET/@GEOID	/GENESET/@HISTORICAL_NAMES	/GENESET/@MEMBERS	/GENESET/@MEMBERS_EZID	/GENESET/@MEMBERS_MAPPING	/GENESET/@MEMBERS_SYMBOLIZED	/GENESET/@ORGANISM	/GENESET/@PMID	/GENESET/@REFINEMENT_DATASETS	/GENESET/@STANDARD_NAME	/GENESET/@SUB_CATEGORY_CODE	/GENESET/@SYSTEMATIC_NAME	/GENESET/@TAGS	/GENESET/@VALIDATION_DATASETS
Jan 12, 2022	export	7.5.1	Liberzon A,Birger C,Thorvaldsdóttir H,Ghandi M,Mesirov JP,Tamayo P.	H	HUMAN_GENE_SYMBOL	Arthur Liberzon	MSigDB Team	Genes up-regulated in response to TGFB1 [GeneID=7040].					BIOCARTA_ALK_PATHWAY;M17400|BIOCARTA_TGFB_PATHWAY;M18933|BREUHAHN_GROWTH_FACTOR_SIGNALING_IN_LIVER_CANCER;M18219|EPITHELIAL_TO_MESENCHYMAL_TRANSITION;M817|GENTILE_UV_RESPONSE_CLUSTER_D6;M15187|IIZUKA_LIVER_CANCER_PROGRESSION_G2_G3_DN;M4707|KEGG_TGF_BETA_SIGNALING_PATHWAY;M2642|LAMB_CCND1_TARGETS;M2935|MIKKELSEN_DEDIFFERENTIATED_STATE_DN;M1927|NADELLA_PRKAR1A_TARGETS_UP;M1790|PID_ALK1_PATHWAY;M185…				ACVR1,APC,ARID4B,BCAR3,BMP2,BMPR1A,BMPR2,CDH1,CDK9,CDKN1C,CTNNB1,ENG,FKBP1A,FNTA,FURIN,HDAC1,HIPK2,ID1,ID2,ID3,IFNGR2,JUNB,KLF10,LEFTY2,LTBP2,MAP3K7,NCOR2,NOG,PMEPA1,PPM1A,PPP1CA,PPP1R15A,RAB31,RHOA,SERPINE1,SKI,SKIL,SLC20A1,SMAD1,SMAD3,SMAD6,SMAD7,SMURF1,SMURF2,SPTBN1,TGFB1,TGFBR1,TGIF1,THBS1,TJP1,TRIM33,UBE2D3,WWTR1,XIAP	1.0251e+215	ACVR1,ACVR1,90|APC,APC,324|ARID4B,ARID4B,51742|BCAR3,BCAR3,8412|BMP2,BMP2,650|BMPR1A,BMPR1A,657|BMPR2,BMPR2,659|CDH1,CDH1,999|CDK9,CDK9,1025|CDKN1C,CDKN1C,1028|CTNNB1,CTNNB1,1499|ENG,ENG,2022|FKBP1A,FKBP1A,2280|FNTA,FNTA,2339|FURIN,FURIN,5045|HDAC1,HDAC1,3065|HIPK2,HIPK2,28996|ID1,ID1,3397|ID2,ID2,3398|ID3,ID3,3399|IFNGR2,IFNGR2,3460|JUNB,JUNB,3726|KLF10,KLF10,7071|LEFTY2,LEFTY2,7044|LTBP2,LTBP2,…	ACVR1,APC,ARID4B,BCAR3,BMP2,BMPR1A,BMPR2,CDH1,CDK9,CDKN1C,CTNNB1,ENG,FKBP1A,FNTA,FURIN,HDAC1,HIPK2,ID1,ID2,ID3,IFNGR2,JUNB,KLF10,LEFTY2,LTBP2,MAP3K7,NCOR2,NOG,PMEPA1,PPM1A,PPP1CA,PPP1R15A,RAB31,RHOA,SERPINE1,SKI,SKIL,SLC20A1,SMAD1,SMAD3,SMAD6,SMAD7,SMURF1,SMURF2,SPTBN1,TGFB1,TGFBR1,TGIF1,THBS1,TJP1,TRIM33,UBE2D3,WWTR1,XIAP	Homo sapiens	26771021	GSE17708,TGFB1 at 8-16h vs 0-0.5h A549 (non small cell carcinoma)|GSE45945,TGFB1 2-4h vs control and 20min HepG2 (hepatocellular carcinoma)|GSE46109,TGFB1 8h vs untreated common dendritic progenitors|GSE7568,TGFB1 at 24h vs control BC284 (macrophages)	HALLMARK_TGF_BETA_SIGNALING		M5896		GSE14491,TGFB1 vs control in MDA-MB-231 (breast carcinoma)|GSE40151,pulmonary fibrosis by bleomycin vs control days 7-14 lung
