# Supplementary material for: Differentiated glioma cell-derived fibromodulin activates integrin-dependent Notch signaling in endothelial cells to promote tumor angiogenesis and growth
Source: eLife journal article supplement (doi:10.7554/elife.78972), 2022-06-01
Supplement: fig1-figsupp1-data1 [file 1.DATA FOR GO OF PANEL A.xlsx]

## Sheet: Sheet1
C: Category value	N: Total size	N: Selection size	N: Category size	N: Intersection size	N: Enrichment factor	N: P value	N: Benj. Hoch. FDR
RNA binding [GO:0003723]	3003	141	583	7	0.25572	3.4444e-07	0.0006975
nucleoplasm [GO:0005654]	3003	141	772	12	0.33106	8.8666e-08	1.5339e-05
nucleus [GO:0005634]	3003	141	955	17	0.37912	1.6458e-08	4.2709e-06
cytoplasm [GO:0005737]	3003	141	926	17	0.391	5.8544e-08	1.2154e-05
cytosol [GO:0005829]	3003	141	1415	32	0.48165	5.3624e-10	2.2265e-07
C: Category value	N: Total size	N: Selection size	N: Category size	N: Intersection size	N: Enrichment factor	N: P value	N: Benj. Hoch. FDR
extracellular region [GO:0005576]	3003	141	412	50	2.5847	1.2844e-11	6.6659e-09
integral component of membrane [GO:0016021]	3003	141	250	31	2.6409	1.5516e-07	2.3008e-05
cell surface [GO:0009986]	3003	141	137	17	2.6428	0.00011713	0.012158
extracellular space [GO:0005615]	3003	141	409	51	2.6557	2.4784e-12	2.5725e-09
Golgi membrane [GO:0000139]	3003	141	168	24	3.0426	3.585e-07	4.9616e-05
extracellular matrix organization [GO:0030198]	3003	141	83	18	4.6188	1.9608e-08	6.1069e-05
SUBCELLULAR LOCATION: Secreted.	3003	141	52	12	4.9149	2.5358e-06	0.0066565
serine-type endopeptidase activity [GO:0004252]	3003	141	42	10	5.0709	1.3297e-05	0.0076935
platelet degranulation [GO:0002576]	3003	141	53	13	5.224	4.5193e-07	0.001126
platelet alpha granule lumen [GO:0031093]	3003	141	27	8	6.3105	1.8195e-05	0.0020984
collagen binding [GO:0005518]	3003	141	27	9	7.0993	1.7963e-06	0.002425
laminin binding [GO:0043236]	3003	141	14	6	9.1277	2.0071e-05	0.0090319
fibronectin binding [GO:0001968]	3003	141	16	7	9.3178	3.2985e-06	0.0022265
O-glycan processing [GO:0016266]	3003	141	16	9	11.98	7.2146e-09	8.988e-05
Category	Enrichment factor
O-glycan processing	11.98
fibronectin binding	9.3178
laminin binding	9.1277
collagen binding	7.0993
platelet alpha granule lumen	6.3105
platelet degranulation	5.224
serine-type endopeptidase activity	5.0709
extracellular matrix organization	4.6188
Golgi membrane	3.0426
extracellular space	2.6557
cell surface	2.6428
integral component of membrane	2.6409
extracellular region	2.5847
