# Supplementary material for: Differentiated glioma cell-derived fibromodulin activates integrin-dependent Notch signaling in endothelial cells to promote tumor angiogenesis and growth
Source: eLife journal article supplement (doi:10.7554/elife.78972), 2022-06-01
Supplement: fig1-figsupp1-data1 [file DATA FOR GO OF PANEL B.xlsx]

## Sheet: Sheet1
C: Category column	C: Category value	N: Total size	N: Selection size	N: Category size	N: Intersection size	N: Enrichment factor	N: P value	N: Benj. Hoch. FDR
C: Gene ontology (biological process)	MAPK cascade [GO:0000165]	3003	36	76	7	7.6831	2.133e-05	0.0064811
C: Gene ontology (biological process)	Wnt signaling pathway, planar cell polarity pathway [GO:0060071]	3003	36	56	7	10.427	2.7594e-06	0.0011089
C: Gene ontology (biological process)	stimulatory C-type lectin receptor signaling pathway [GO:0002223]	3003	36	55	7	10.617	2.4384e-06	0.0011251
C: Gene ontology (biological process)	T cell receptor signaling pathway [GO:0050852]	3003	36	55	7	10.617	2.4384e-06	0.0010849
C: Gene ontology (biological process)	negative regulation of canonical Wnt signaling pathway [GO:0090090]	3003	36	64	7	9.1237	6.8284e-06	0.0022991
C: Gene ontology (biological process)	positive regulation of canonical Wnt signaling pathway [GO:0090263]	3003	36	53	7	11.017	1.8892e-06	0.00094142
C: Gene ontology (cellular component)	proteasome complex [GO:0000502]	3003	36	53	7	11.017	1.8892e-06	0.00078439
C: Gene ontology (biological process)	protein polyubiquitination [GO:0000209]	3003	36	68	9	11.04	5.0007e-08	0.00020766
C: Gene ontology (biological process)	positive regulation of ubiquitin-protein ligase activity involved in regulation of mitotic cell cycle transition [GO:0051437]	3003	36	49	7	11.917	1.0952e-06	0.00085275
C: Gene ontology (biological process)	NIK/NF-kappaB signaling [GO:0038061]	3003	36	48	7	12.165	9.4805e-07	0.00098423
C: Gene ontology (biological process)	regulation of cellular amino acid metabolic process [GO:0006521]	3003	36	43	7	13.579	4.3587e-07	0.001086
C: Gene ontology (cellular component)	proteasome core complex [GO:0005839]	3003	36	19	7	30.732	8.6236e-10	1.7903e-06
C: Gene ontology (cellular component)	GINS complex [GO:0000811]	3003	36	3	3	83.417	1.5835e-06	0.00082184
C: Gene ontology (biological process)	DNA strand elongation involved in DNA replication [GO:0006271]	3003	36	4	4	83.417	1.7418e-08	0.000217
Category	Enrichment factor
GINS complex	83.417
DNA strand elongation involved in DNA replication	83.417
proteasome core complex	30.732
regulation of cellular amino acid metabolic process	13.579
NIK/NF-kappaB signaling	12.165
positive regulation of ubiquitin-protein ligase activity	11.917
protein polyubiquitination	11.04
positive regulation of canonical Wnt signaling pathway	11.017
proteasome complex	11.017
stimulatory C-type lectin receptor signaling pathway	10.617
T cell receptor signaling pathway	10.617
Wnt signaling pathway, planar cell polarity pathway	10.427
negative regulation of canonical Wnt signaling pathway	9.1237
MAPK cascade	7.6831
