# Supplementary material for: Differentiated glioma cell-derived fibromodulin activates integrin-dependent Notch signaling in endothelial cells to promote tumor angiogenesis and growth
Source: eLife journal article supplement (doi:10.7554/elife.78972), 2022-06-01
Supplement: fig1-figsupp2-data1 [file TGBETA GENESETS ENRICHED IN DGCS.xlsx]

## Sheet: TGFB ENRICHMENT IN DGC GSE54791
NAME	GS<br> follow link to MSigDB	GS DETAILS	SIZE	ES	NES	NOM p-val	FDR q-val	FWER p-val	RANK AT MAX	LEADING EDGE
TGFB_UP.V1_UP	TGFB_UP.V1_UP	Details ...	65	-0.588312	-2.56191	0	0	0	926	tags=57%, list=19%, signal=69%
GSE43955_1H_VS_20H_ACT_CD4_TCELL_WITH_TGFB_IL6_DN	GSE43955_1H_VS_20H_ACT_CD4_TCELL_WITH_TGFB_IL6_DN	Details ...	64	-0.62108	-2.48207	0	0	0	818	tags=58%, list=17%, signal=69%
PLASARI_TGFB1_TARGETS_10HR_UP	PLASARI_TGFB1_TARGETS_10HR_UP	Details ...	59	-0.561148	-2.46803	0	0	0	818	tags=56%, list=17%, signal=66%
MCBRYAN_PUBERTAL_TGFB1_TARGETS_UP	MCBRYAN_PUBERTAL_TGFB1_TARGETS_UP	Details ...	69	-0.563599	-2.38654	0	0	0	1024	tags=54%, list=21%, signal=67%
GSE2770_TGFB_AND_IL4_ACT_VS_ACT_CD4_TCELL_2H_DN	GSE2770_TGFB_AND_IL4_ACT_VS_ACT_CD4_TCELL_2H_DN	Details ...	59	-0.580812	-2.3171	0	3.76936e-05	0.01	1365	tags=71%, list=28%, signal=98%
HALLMARK_TGF_BETA_SIGNALING	HALLMARK_TGF_BETA_SIGNALING	Details ...	21	-0.656181	-2.22499	0	0.000328612	0.11	999	tags=67%, list=20%, signal=83%
VERRECCHIA_EARLY_RESPONSE_TO_TGFB1	VERRECCHIA_EARLY_RESPONSE_TO_TGFB1	Details ...	28	-0.625641	-2.21558	0	0.000338339	0.11	753	tags=57%, list=15%, signal=67%
WP_TGFBETA_RECEPTOR_SIGNALLING_IN_SKELETAL_DYSPLASIAS	WP_TGFBETA_RECEPTOR_SIGNALLING_IN_SKELETAL_DYSPLASIAS	Details ...	16	-0.720709	-2.2098	0	0.000379754	0.13	591	tags=75%, list=12%, signal=85%
COULOUARN_TEMPORAL_TGFB1_SIGNATURE_UP	COULOUARN_TEMPORAL_TGFB1_SIGNATURE_UP	Details ...	34	-0.566629	-2.09162	0	0.00156122	0.59	1231	tags=65%, list=25%, signal=86%
GSE43955_TH0_VS_TGFB_IL6_TH17_ACT_CD4_TCELL_30H_UP	GSE43955_TH0_VS_TGFB_IL6_TH17_ACT_CD4_TCELL_30H_UP	Details ...	53	-0.515826	-2.08453	0	0.00170669	0.65	918	tags=45%, list=19%, signal=55%
REACTOME_SIGNALING_BY_TGFB_FAMILY_MEMBERS	REACTOME_SIGNALING_BY_TGFB_FAMILY_MEMBERS	Details ...	27	-0.626969	-2.06332	0	0.00228888	0.78	999	tags=56%, list=20%, signal=69%
GSE43955_10H_VS_60H_ACT_CD4_TCELL_WITH_TGFB_IL6_DN	GSE43955_10H_VS_60H_ACT_CD4_TCELL_WITH_TGFB_IL6_DN	Details ...	66	-0.464692	-1.98874	0	0.00472915	0.97	915	tags=45%, list=19%, signal=55%
GSE43955_1H_VS_10H_ACT_CD4_TCELL_WITH_TGFB_IL6_DN	GSE43955_1H_VS_10H_ACT_CD4_TCELL_WITH_TGFB_IL6_DN	Details ...	69	-0.446223	-1.94486	0	0.00681065	0.99	924	tags=42%, list=19%, signal=51%
KEGG_TGF_BETA_SIGNALING_PATHWAY	KEGG_TGF_BETA_SIGNALING_PATHWAY	Details ...	24	-0.547166	-1.94041	0	0.00708743	1	648	tags=50%, list=13%, signal=57%
WP_TGFBETA_RECEPTOR_SIGNALING	WP_TGFBETA_RECEPTOR_SIGNALING	Details ...	15	-0.70811	-1.93015	0	0.00778804	1	591	tags=73%, list=12%, signal=83%
GSE22025_TGFB1_VS_TGFB1_AND_PROGESTERONE_TREATED_CD4_TCELL_DN	GSE22025_TGFB1_VS_TGFB1_AND_PROGESTERONE_TREATED_CD4_TCELL_DN	Details ...	58	-0.461531	-1.92608	0	0.00813687	1	1288	tags=60%, list=26%, signal=81%
PLASARI_TGFB1_TARGETS_10HR_DN	PLASARI_TGFB1_TARGETS_10HR_DN	Details ...	88	-0.443615	-1.92081	0	0.00865735	1	520	tags=31%, list=11%, signal=34%
GSE21670_UNTREATED_VS_TGFB_TREATED_CD4_TCELL_DN	GSE21670_UNTREATED_VS_TGFB_TREATED_CD4_TCELL_DN	Details ...	49	-0.459372	-1.91555	0	0.00896539	1	1132	tags=59%, list=23%, signal=76%
VERRECCHIA_DELAYED_RESPONSE_TO_TGFB1	VERRECCHIA_DELAYED_RESPONSE_TO_TGFB1	Details ...	17	-0.65899	-1.90083	0	0.0101421	1	608	tags=47%, list=12%, signal=54%
GSE2770_IL12_AND_TGFB_VS_IL4_TREATED_ACT_CD4_TCELL_2H_UP	GSE2770_IL12_AND_TGFB_VS_IL4_TREATED_ACT_CD4_TCELL_2H_UP	Details ...	61	-0.423096	-1.88986	0	0.0111902	1	2125	tags=80%, list=44%, signal=140%
GSE43955_1H_VS_42H_ACT_CD4_TCELL_WITH_TGFB_IL6_DN	GSE43955_1H_VS_42H_ACT_CD4_TCELL_WITH_TGFB_IL6_DN	Details ...	59	-0.44722	-1.8803	0	0.0123348	1	643	tags=32%, list=13%, signal=37%
GSE39820_CTRL_VS_TGFBETA3_IL6_CD4_TCELL_DN	GSE39820_CTRL_VS_TGFBETA3_IL6_CD4_TCELL_DN	Details ...	70	-0.420525	-1.8408	0	0.0167101	1	1616	tags=69%, list=33%, signal=101%
GSE7568_CTRL_VS_24H_TGFB_TREATED_MACROPHAGES_WITH_IL4_AND_DEXAMETHASONE_UP	GSE7568_CTRL_VS_24H_TGFB_TREATED_MACROPHAGES_WITH_IL4_AND_DEXAMETHASONE_UP	Details ...	53	-0.443274	-1.81728	0	0.0196385	1	1044	tags=45%, list=21%, signal=57%
GSE2770_TGFB_AND_IL4_VS_IL4_TREATED_ACT_CD4_TCELL_48H_UP	GSE2770_TGFB_AND_IL4_VS_IL4_TREATED_ACT_CD4_TCELL_48H_UP	Details ...	61	-0.421501	-1.79541	0	0.0231857	1	2062	tags=79%, list=42%, signal=134%
GSE23505_IL6_IL1_IL23_VS_IL6_IL1_TGFB_TREATED_CD4_TCELL_UP	GSE23505_IL6_IL1_IL23_VS_IL6_IL1_TGFB_TREATED_CD4_TCELL_UP	Details ...	62	-0.41872	-1.74504	0	0.0329229	1	607	tags=26%, list=12%, signal=29%
GSE7460_CTRL_VS_TGFB_TREATED_ACT_FOXP3_HET_TCONV_DN	GSE7460_CTRL_VS_TGFB_TREATED_ACT_FOXP3_HET_TCONV_DN	Details ...	59	-0.395658	-1.72372	0	0.0377942	1	1171	tags=49%, list=24%, signal=64%
GSE21670_STAT3_KO_VS_WT_CD4_TCELL_TGFB_IL6_TREATED_DN	GSE21670_STAT3_KO_VS_WT_CD4_TCELL_TGFB_IL6_TREATED_DN	Details ...	62	-0.410505	-1.71089	0	0.0408515	1	1401	tags=60%, list=29%, signal=83%
GSE2770_TGFB_AND_IL4_VS_IL12_TREATED_ACT_CD4_TCELL_2H_DN	GSE2770_TGFB_AND_IL4_VS_IL12_TREATED_ACT_CD4_TCELL_2H_DN	Details ...	54	-0.429227	-1.691	0	0.0461976	1	803	tags=37%, list=16%, signal=44%
GSE7460_WT_VS_FOXP3_HET_ACT_WITH_TGFB_TCONV_DN	GSE7460_WT_VS_FOXP3_HET_ACT_WITH_TGFB_TCONV_DN	Details ...	45	-0.413946	-1.64014	0	0.0626967	1	1150	tags=49%, list=24%, signal=63%
GSE43955_TH0_VS_TGFB_IL6_TH17_ACT_CD4_TCELL_60H_DN	GSE43955_TH0_VS_TGFB_IL6_TH17_ACT_CD4_TCELL_60H_DN	Details ...	60	-0.388357	-1.61277	0	0.0728412	1	709	tags=32%, list=15%, signal=37%
GSE39820_CTRL_VS_TGFBETA1_IL6_CD4_TCELL_DN	GSE39820_CTRL_VS_TGFBETA1_IL6_CD4_TCELL_DN	Details ...	73	-0.401193	-1.60902	0	0.0745864	1	1545	tags=56%, list=32%, signal=81%
KARLSSON_TGFB1_TARGETS_DN	KARLSSON_TGFB1_TARGETS_DN	Details ...	61	-0.389735	-1.59446	0	0.0809021	1	1021	tags=43%, list=21%, signal=53%
GSE43955_TH0_VS_TGFB_IL6_IL23_TH17_ACT_CD4_TCELL_52H_DN	GSE43955_TH0_VS_TGFB_IL6_IL23_TH17_ACT_CD4_TCELL_52H_DN		63	-0.351985	-1.49994	0	0.129836	1	845	tags=32%, list=17%, signal=38%
GSE43955_1H_VS_60H_ACT_CD4_TCELL_WITH_TGFB_IL6_DN	GSE43955_1H_VS_60H_ACT_CD4_TCELL_WITH_TGFB_IL6_DN		66	-0.366014	-1.47165	0	0.148436	1	707	tags=30%, list=14%, signal=35%
GSE22025_UNTREATED_VS_TGFB1_TREATED_CD4_TCELL_UP	GSE22025_UNTREATED_VS_TGFB1_TREATED_CD4_TCELL_UP		50	-0.363743	-1.43704	0.0153846	0.171624	1	1132	tags=40%, list=23%, signal=52%
GSE7460_CTRL_VS_TGFB_TREATED_ACT_TCONV_DN	GSE7460_CTRL_VS_TGFB_TREATED_ACT_TCONV_DN	Details ...	54	-0.429731	-1.72997	0.015625	0.036625	1	1004	tags=54%, list=21%, signal=67%
GSE43955_TH0_VS_TGFB_IL6_IL23_TH17_ACT_CD4_TCELL_60H_UP	GSE43955_TH0_VS_TGFB_IL6_IL23_TH17_ACT_CD4_TCELL_60H_UP	Details ...	60	-0.412713	-1.67352	0.015873	0.0519787	1	621	tags=30%, list=13%, signal=34%
PID_TGFBR_PATHWAY	PID_TGFBR_PATHWAY	Details ...	17	-0.628688	-1.84496	0.0163934	0.0161351	1	1457	tags=82%, list=30%, signal=117%
GSE43955_TH0_VS_TGFB_IL6_TH17_ACT_CD4_TCELL_42H_UP	GSE43955_TH0_VS_TGFB_IL6_TH17_ACT_CD4_TCELL_42H_UP	Details ...	46	-0.409086	-1.60464	0.0163934	0.0763209	1	1697	tags=63%, list=35%, signal=96%
GSE43955_TH0_VS_TGFB_IL6_TH17_ACT_CD4_TCELL_1H_UP	GSE43955_TH0_VS_TGFB_IL6_TH17_ACT_CD4_TCELL_1H_UP	Details ...	60	-0.400518	-1.63053	0.0166667	0.0663413	1	798	tags=33%, list=16%, signal=39%
PLASARI_TGFB1_SIGNALING_VIA_NFIC_1HR_DN	PLASARI_TGFB1_SIGNALING_VIA_NFIC_1HR_DN	Details ...	32	-0.429001	-1.61352	0.0166667	0.0725546	1	637	tags=34%, list=13%, signal=39%
WP_TGFBETA_SIGNALING_PATHWAY	WP_TGFBETA_SIGNALING_PATHWAY		39	-0.403386	-1.45733	0.0169492	0.15746	1	742	tags=33%, list=15%, signal=39%
PLASARI_TGFB1_TARGETS_1HR_UP	PLASARI_TGFB1_TARGETS_1HR_UP	Details ...	15	-0.590212	-1.83229	0.0172414	0.0178346	1	922	tags=67%, list=19%, signal=82%
GSE22025_PROGESTERONE_VS_TGFB1_AND_PROGESTERONE_TREATED_CD4_TCELL_UP	GSE22025_PROGESTERONE_VS_TGFB1_AND_PROGESTERONE_TREATED_CD4_TCELL_UP	Details ...	55	-0.360336	-1.52376	0.0172414	0.11621	1	994	tags=36%, list=20%, signal=45%
GSE43955_TH0_VS_TGFB_IL6_TH17_ACT_CD4_TCELL_4H_UP	GSE43955_TH0_VS_TGFB_IL6_TH17_ACT_CD4_TCELL_4H_UP	Details ...	62	-0.455148	-1.75597	0.0175439	0.0308592	1	794	tags=40%, list=16%, signal=48%
GSE43955_TGFB_IL6_VS_TGFB_IL6_IL23_TH17_ACT_CD4_TCELL_52H_DN	GSE43955_TGFB_IL6_VS_TGFB_IL6_IL23_TH17_ACT_CD4_TCELL_52H_DN	Details ...	65	-0.383634	-1.58547	0.0192308	0.085292	1	1326	tags=49%, list=27%, signal=67%
GSE43955_1H_VS_60H_ACT_CD4_TCELL_WITH_TGFB_IL6_UP	GSE43955_1H_VS_60H_ACT_CD4_TCELL_WITH_TGFB_IL6_UP		43	-0.389399	-1.49687	0.0192308	0.13215	1	1211	tags=42%, list=25%, signal=55%
TGFB_UP.V1_DN	TGFB_UP.V1_DN	Details ...	46	-0.426777	-1.6912	0.031746	0.0461477	1	806	tags=39%, list=16%, signal=46%
GSE43955_TH0_VS_TGFB_IL6_TH17_ACT_CD4_TCELL_10H_UP	GSE43955_TH0_VS_TGFB_IL6_TH17_ACT_CD4_TCELL_10H_UP		58	-0.363688	-1.50415	0.0338983	0.127242	1	946	tags=34%, list=19%, signal=42%
GSE2770_TGFB_AND_IL4_ACT_VS_ACT_CD4_TCELL_48H_UP	GSE2770_TGFB_AND_IL4_ACT_VS_ACT_CD4_TCELL_48H_UP	Details ...	59	-0.383033	-1.65404	0.0344828	0.0579782	1	2219	tags=81%, list=45%, signal=147%
GSE43955_10H_VS_30H_ACT_CD4_TCELL_WITH_TGFB_IL6_DN	GSE43955_10H_VS_30H_ACT_CD4_TCELL_WITH_TGFB_IL6_DN	Details ...	44	-0.451852	-1.64708	0.0344828	0.0603021	1	909	tags=48%, list=19%, signal=58%
GSE43955_TH0_VS_TGFB_IL6_TH17_ACT_CD4_TCELL_1H_DN	GSE43955_TH0_VS_TGFB_IL6_TH17_ACT_CD4_TCELL_1H_DN		48	-0.366671	-1.50436	0.0350877	0.127201	1	1159	tags=44%, list=24%, signal=57%
GSE39820_TGFBETA1_IL6_VS_TGFBETA1_IL6_IL23A_TREATED_CD4_TCELL_DN	GSE39820_TGFBETA1_IL6_VS_TGFBETA1_IL6_IL23A_TREATED_CD4_TCELL_DN		53	-0.361858	-1.44976	0.0350877	0.162371	1	531	tags=21%, list=11%, signal=23%
GSE39820_TGFBETA1_VS_TGFBETA3_IN_IL6_TREATED_CD4_TCELL_DN	GSE39820_TGFBETA1_VS_TGFBETA3_IN_IL6_TREATED_CD4_TCELL_DN		43	-0.367708	-1.45149	0.0363636	0.161013	1	926	tags=28%, list=19%, signal=34%
GSE43955_TH0_VS_TGFB_IL6_IL23_TH17_ACT_CD4_TCELL_60H_DN	GSE43955_TH0_VS_TGFB_IL6_IL23_TH17_ACT_CD4_TCELL_60H_DN		59	-0.367202	-1.49302	0.0377359	0.134794	1	1210	tags=44%, list=25%, signal=58%
GSE21670_TGFB_VS_TGFB_AND_IL6_TREATED_CD4_TCELL_UP	GSE21670_TGFB_VS_TGFB_AND_IL6_TREATED_CD4_TCELL_UP		57	-0.336516	-1.37793	0.0454545	0.219142	1	1049	tags=37%, list=21%, signal=46%
GSE43955_TH0_VS_TGFB_IL6_TH17_ACT_CD4_TCELL_42H_DN	GSE43955_TH0_VS_TGFB_IL6_TH17_ACT_CD4_TCELL_42H_DN		45	-0.383783	-1.48876	0.0508475	0.137327	1	814	tags=33%, list=17%, signal=40%
GSE43955_TH0_VS_TGFB_IL6_IL23_TH17_ACT_CD4_TCELL_52H_UP	GSE43955_TH0_VS_TGFB_IL6_IL23_TH17_ACT_CD4_TCELL_52H_UP		50	-0.370533	-1.4429	0.0571429	0.167564	1	1156	tags=44%, list=24%, signal=57%
GSE7568_IL4_TGFB_DEXAMETHASONE_VS_IL4_TGFB_TREATED_MACROPHAGE_DN	GSE7568_IL4_TGFB_DEXAMETHASONE_VS_IL4_TGFB_TREATED_MACROPHAGE_DN		53	-0.332947	-1.36986	0.0588235	0.225706	1	1936	tags=74%, list=40%, signal=121%
GSE2770_IL12_AND_TGFB_ACT_VS_ACT_CD4_TCELL_2H_UP	GSE2770_IL12_AND_TGFB_ACT_VS_ACT_CD4_TCELL_2H_UP		62	-0.322996	-1.43076	0.0625	0.175885	1	2011	tags=69%, list=41%, signal=116%
GSE21670_UNTREATED_VS_TGFB_IL6_TREATED_STAT3_KO_CD4_TCELL_UP	GSE21670_UNTREATED_VS_TGFB_IL6_TREATED_STAT3_KO_CD4_TCELL_UP		58	-0.349768	-1.41451	0.0666667	0.187996	1	995	tags=31%, list=20%, signal=39%
GSE2770_TGFB_AND_IL4_ACT_VS_ACT_CD4_TCELL_2H_UP	GSE2770_TGFB_AND_IL4_ACT_VS_ACT_CD4_TCELL_2H_UP		51	-0.35199	-1.34885	0.0677966	0.244675	1	723	tags=24%, list=15%, signal=27%
REACTOME_SIGNALING_BY_TGF_BETA_RECEPTOR_COMPLEX	REACTOME_SIGNALING_BY_TGF_BETA_RECEPTOR_COMPLEX	Details ...	18	-0.533262	-1.61252	0.0740741	0.0728859	1	768	tags=39%, list=16%, signal=46%
GSE43955_10H_VS_60H_ACT_CD4_TCELL_WITH_TGFB_IL6_UP	GSE43955_10H_VS_60H_ACT_CD4_TCELL_WITH_TGFB_IL6_UP		59	-0.312527	-1.31422	0.0757576	0.27834	1	965	tags=27%, list=20%, signal=33%
GSE43955_TGFB_IL6_VS_TGFB_IL6_IL23_TH17_ACT_CD4_TCELL_52H_UP	GSE43955_TGFB_IL6_VS_TGFB_IL6_IL23_TH17_ACT_CD4_TCELL_52H_UP		48	-0.343408	-1.40048	0.0833333	0.200332	1	574	tags=23%, list=12%, signal=26%
GSE45382_UNTREATED_VS_TGFB_TREATED_MACROPHAGES_DN	GSE45382_UNTREATED_VS_TGFB_TREATED_MACROPHAGES_DN		63	-0.308823	-1.30101	0.0833333	0.291682	1	1155	tags=40%, list=24%, signal=51%
MCBRYAN_PUBERTAL_TGFB1_TARGETS_DN	MCBRYAN_PUBERTAL_TGFB1_TARGETS_DN		18	-0.452461	-1.48602	0.0892857	0.13915	1	1159	tags=50%, list=24%, signal=65%
GSE2770_UNTREATED_VS_TGFB_AND_IL12_TREATED_ACT_CD4_TCELL_2H_UP	GSE2770_UNTREATED_VS_TGFB_AND_IL12_TREATED_ACT_CD4_TCELL_2H_UP		50	-0.332393	-1.35196	0.0923077	0.241377	1	689	tags=24%, list=14%, signal=28%
GSE22025_PROGESTERONE_VS_TGFB1_AND_PROGESTERONE_TREATED_CD4_TCELL_DN	GSE22025_PROGESTERONE_VS_TGFB1_AND_PROGESTERONE_TREATED_CD4_TCELL_DN		52	-0.363243	-1.45232	0.0980392	0.160624	1	1093	tags=37%, list=22%, signal=47%
GSE21670_UNTREATED_VS_TGFB_TREATED_STAT3_KO_CD4_TCELL_DN	GSE21670_UNTREATED_VS_TGFB_TREATED_STAT3_KO_CD4_TCELL_DN		53	-0.3203	-1.38137	0.106061	0.216249	1	768	tags=34%, list=16%, signal=40%
GSE2770_IL12_VS_TGFB_AND_IL12_TREATED_ACT_CD4_TCELL_48H_UP	GSE2770_IL12_VS_TGFB_AND_IL12_TREATED_ACT_CD4_TCELL_48H_UP		57	-0.334898	-1.41919	0.107692	0.184138	1	1044	tags=42%, list=21%, signal=53%
GSE2770_TGFB_AND_IL4_VS_IL12_TREATED_ACT_CD4_TCELL_48H_DN	GSE2770_TGFB_AND_IL4_VS_IL12_TREATED_ACT_CD4_TCELL_48H_DN		59	-0.319522	-1.31391	0.107692	0.278662	1	1558	tags=46%, list=32%, signal=66%
GSE43955_TH0_VS_TGFB_IL6_TH17_ACT_CD4_TCELL_4H_DN	GSE43955_TH0_VS_TGFB_IL6_TH17_ACT_CD4_TCELL_4H_DN		57	-0.300508	-1.27775	0.111111	0.314708	1	1707	tags=67%, list=35%, signal=101%
GSE39820_TGFBETA3_IL6_VS_TGFBETA3_IL6_IL23A_TREATED_CD4_TCELL_UP	GSE39820_TGFBETA3_IL6_VS_TGFBETA3_IL6_IL23A_TREATED_CD4_TCELL_UP		49	-0.347236	-1.37613	0.113208	0.220751	1	1800	tags=69%, list=37%, signal=109%
GSE43955_TH0_VS_TGFB_IL6_TH17_ACT_CD4_TCELL_10H_DN	GSE43955_TH0_VS_TGFB_IL6_TH17_ACT_CD4_TCELL_10H_DN		55	-0.305593	-1.2837	0.12069	0.308766	1	649	tags=25%, list=13%, signal=29%
GSE7460_CTRL_VS_TGFB_TREATED_ACT_FOXP3_MUT_TCONV_DN	GSE7460_CTRL_VS_TGFB_TREATED_ACT_FOXP3_MUT_TCONV_DN		43	-0.332891	-1.33831	0.122449	0.254655	1	1143	tags=47%, list=23%, signal=60%
LEE_LIVER_CANCER_MYC_TGFA_UP	LEE_LIVER_CANCER_MYC_TGFA_UP		19	-0.405736	-1.29033	0.125	0.302421	1	1586	tags=74%, list=32%, signal=109%
GSE22025_TGFB1_VS_TGFB1_AND_PROGESTERONE_TREATED_CD4_TCELL_UP	GSE22025_TGFB1_VS_TGFB1_AND_PROGESTERONE_TREATED_CD4_TCELL_UP		66	-0.333667	-1.28106	0.126761	0.311381	1	869	tags=35%, list=18%, signal=42%
GSE2770_IL12_AND_TGFB_ACT_VS_ACT_CD4_TCELL_6H_UP	GSE2770_IL12_AND_TGFB_ACT_VS_ACT_CD4_TCELL_6H_UP		60	-0.300385	-1.2824	0.131148	0.310051	1	1088	tags=37%, list=22%, signal=47%
KARLSSON_TGFB1_TARGETS_UP	KARLSSON_TGFB1_TARGETS_UP		48	-0.306479	-1.24451	0.131148	0.351073	1	760	tags=25%, list=16%, signal=29%
GSE7596_AKT_TRANSD_VS_CTRL_CD4_TCONV_WITH_TGFB_DN	GSE7596_AKT_TRANSD_VS_CTRL_CD4_TCONV_WITH_TGFB_DN		29	-0.378193	-1.34032	0.142857	0.253354	1	519	tags=31%, list=11%, signal=35%
GSE7460_FOXP3_MUT_VS_WT_ACT_WITH_TGFB_TCONV_UP	GSE7460_FOXP3_MUT_VS_WT_ACT_WITH_TGFB_TCONV_UP		52	-0.314788	-1.25493	0.145161	0.339891	1	824	tags=29%, list=17%, signal=34%
PLASARI_TGFB1_SIGNALING_VIA_NFIC_10HR_UP	PLASARI_TGFB1_SIGNALING_VIA_NFIC_10HR_UP		22	-0.420499	-1.30024	0.145833	0.291891	1	480	tags=36%, list=10%, signal=40%
GSE7568_CTRL_VS_24H_TGFB_TREATED_MACROPHAGES_WITH_IL4_AND_DEXAMETHASONE_DN	GSE7568_CTRL_VS_24H_TGFB_TREATED_MACROPHAGES_WITH_IL4_AND_DEXAMETHASONE_DN		41	-0.34896	-1.30092	0.157895	0.291784	1	588	tags=29%, list=12%, signal=33%
GSE22025_UNTREATED_VS_TGFB1_AND_PROGESTERONE_TREATED_CD4_TCELL_UP	GSE22025_UNTREATED_VS_TGFB1_AND_PROGESTERONE_TREATED_CD4_TCELL_UP		45	-0.301318	-1.22319	0.16129	0.376113	1	671	tags=27%, list=14%, signal=31%
GSE2770_IL12_VS_TGFB_AND_IL12_TREATED_ACT_CD4_TCELL_6H_DN	GSE2770_IL12_VS_TGFB_AND_IL12_TREATED_ACT_CD4_TCELL_6H_DN		44	-0.352333	-1.29328	0.178571	0.299012	1	797	tags=23%, list=16%, signal=27%
GSE7596_AKT_TRANSD_VS_CTRL_CD4_TCONV_WITH_TGFB_UP	GSE7596_AKT_TRANSD_VS_CTRL_CD4_TCONV_WITH_TGFB_UP		35	-0.352434	-1.26718	0.196721	0.325854	1	1365	tags=46%, list=28%, signal=63%
GSE43955_TH0_VS_TGFB_IL6_TH17_ACT_CD4_TCELL_52H_DN	GSE43955_TH0_VS_TGFB_IL6_TH17_ACT_CD4_TCELL_52H_DN		45	-0.316338	-1.25202	0.206349	0.342885	1	780	tags=31%, list=16%, signal=37%
GSE39820_CTRL_VS_TGFBETA1_IL6_IL23A_CD4_TCELL_DN	GSE39820_CTRL_VS_TGFBETA1_IL6_IL23A_CD4_TCELL_DN		56	-0.307052	-1.23396	0.206349	0.362932	1	1333	tags=41%, list=27%, signal=56%
GSE7460_CTRL_VS_TGFB_TREATED_ACT_CD8_TCELL_UP	GSE7460_CTRL_VS_TGFB_TREATED_ACT_CD8_TCELL_UP		67	-0.278984	-1.1814	0.212121	0.42908	1	833	tags=24%, list=17%, signal=28%
GSE7460_WT_VS_FOXP3_HET_ACT_WITH_TGFB_TCONV_UP	GSE7460_WT_VS_FOXP3_HET_ACT_WITH_TGFB_TCONV_UP		45	-0.30349	-1.20015	0.218182	0.40436	1	926	tags=33%, list=19%, signal=41%
GSE7460_FOXP3_MUT_VS_WT_ACT_WITH_TGFB_TCONV_DN	GSE7460_FOXP3_MUT_VS_WT_ACT_WITH_TGFB_TCONV_DN		51	-0.31875	-1.19036	0.21875	0.417984	1	1312	tags=49%, list=27%, signal=66%
GSE22432_UNTREATED_VS_TGFB1_TREATED_COMMON_DC_PROGENITOR_DN	GSE22432_UNTREATED_VS_TGFB1_TREATED_COMMON_DC_PROGENITOR_DN		45	-0.282731	-1.16589	0.225806	0.447568	1	1138	tags=36%, list=23%, signal=46%
COULOUARN_TEMPORAL_TGFB1_SIGNATURE_DN	COULOUARN_TEMPORAL_TGFB1_SIGNATURE_DN		45	-0.290742	-1.20342	0.234375	0.400024	1	994	tags=36%, list=20%, signal=44%
GSE21670_TGFB_VS_IL6_TREATED_CD4_TCELL_UP	GSE21670_TGFB_VS_IL6_TREATED_CD4_TCELL_UP		45	-0.299799	-1.18107	0.241379	0.429378	1	868	tags=40%, list=18%, signal=48%
GSE43955_1H_VS_20H_ACT_CD4_TCELL_WITH_TGFB_IL6_UP	GSE43955_1H_VS_20H_ACT_CD4_TCELL_WITH_TGFB_IL6_UP		46	-0.285785	-1.14387	0.245283	0.477387	1	892	tags=26%, list=18%, signal=32%
GSE2770_IL12_VS_TGFB_AND_IL12_TREATED_ACT_CD4_TCELL_6H_UP	GSE2770_IL12_VS_TGFB_AND_IL12_TREATED_ACT_CD4_TCELL_6H_UP		50	-0.296763	-1.17708	0.245614	0.433916	1	1266	tags=40%, list=26%, signal=53%
GSE39820_CTRL_VS_TGFBETA3_IL6_CD4_TCELL_UP	GSE39820_CTRL_VS_TGFBETA3_IL6_CD4_TCELL_UP		66	-0.305644	-1.25212	0.25	0.342932	1	787	tags=21%, list=16%, signal=25%
GSE2770_TGFB_AND_IL4_VS_IL12_TREATED_ACT_CD4_TCELL_6H_UP	GSE2770_TGFB_AND_IL4_VS_IL12_TREATED_ACT_CD4_TCELL_6H_UP		73	-0.274454	-1.15012	0.25	0.469322	1	1472	tags=49%, list=30%, signal=70%
GSE22025_UNTREATED_VS_TGFB1_TREATED_CD4_TCELL_DN	GSE22025_UNTREATED_VS_TGFB1_TREATED_CD4_TCELL_DN		44	-0.300571	-1.14306	0.25	0.478271	1	671	tags=25%, list=14%, signal=29%
GSE2770_IL12_AND_TGFB_VS_IL4_TREATED_ACT_CD4_TCELL_2H_DN	GSE2770_IL12_AND_TGFB_VS_IL4_TREATED_ACT_CD4_TCELL_2H_DN		55	-0.274898	-1.10317	0.276923	0.532451	1	1877	tags=56%, list=38%, signal=91%
GSE2770_TGFB_AND_IL4_VS_TGFB_AND_IL12_TREATED_ACT_CD4_TCELL_6H_UP	GSE2770_TGFB_AND_IL4_VS_TGFB_AND_IL12_TREATED_ACT_CD4_TCELL_6H_UP		55	-0.278049	-1.17747	0.278689	0.433557	1	1019	tags=29%, list=21%, signal=36%
GSE7568_IL4_VS_IL4_AND_TGFB_TREATED_MACROPHAGE_24H_UP	GSE7568_IL4_VS_IL4_AND_TGFB_TREATED_MACROPHAGE_24H_UP		52	-0.293674	-1.15319	0.278689	0.464803	1	1614	tags=56%, list=33%, signal=82%
GSE21670_UNTREATED_VS_TGFB_IL6_TREATED_STAT3_KO_CD4_TCELL_DN	GSE21670_UNTREATED_VS_TGFB_IL6_TREATED_STAT3_KO_CD4_TCELL_DN		49	-0.28736	-1.14415	0.278689	0.477012	1	1654	tags=51%, list=34%, signal=76%
GSE21670_TGFB_VS_IL6_TREATED_STAT3_KO_CD4_TCELL_DN	GSE21670_TGFB_VS_IL6_TREATED_STAT3_KO_CD4_TCELL_DN		53	-0.267176	-1.13041	0.28125	0.496277	1	581	tags=21%, list=12%, signal=23%
GSE43955_TH0_VS_TGFB_IL6_TH17_ACT_CD4_TCELL_20H_UP	GSE43955_TH0_VS_TGFB_IL6_TH17_ACT_CD4_TCELL_20H_UP		57	-0.285888	-1.13988	0.283333	0.482605	1	1402	tags=42%, list=29%, signal=58%
GSE2770_IL12_AND_TGFB_VS_IL4_TREATED_ACT_CD4_TCELL_48H_DN	GSE2770_IL12_AND_TGFB_VS_IL4_TREATED_ACT_CD4_TCELL_48H_DN		33	-0.327549	-1.1113	0.288462	0.521286	1	1008	tags=33%, list=21%, signal=42%
GSE7460_CTRL_VS_TGFB_TREATED_ACT_TREG_UP	GSE7460_CTRL_VS_TGFB_TREATED_ACT_TREG_UP		55	-0.284591	-1.14023	0.301587	0.482151	1	938	tags=25%, list=19%, signal=31%
GSE21670_STAT3_KO_VS_WT_CD4_TCELL_TGFB_TREATED_DN	GSE21670_STAT3_KO_VS_WT_CD4_TCELL_TGFB_TREATED_DN		49	-0.264842	-1.07582	0.338983	0.570581	1	526	tags=18%, list=11%, signal=20%
GSE43955_TGFB_IL6_VS_TGFB_IL6_IL23_TH17_ACT_CD4_TCELL_60H_DN	GSE43955_TGFB_IL6_VS_TGFB_IL6_IL23_TH17_ACT_CD4_TCELL_60H_DN		60	-0.261507	-1.12002	0.349206	0.509753	1	680	tags=22%, list=14%, signal=25%
GSE2770_UNTREATED_VS_TGFB_AND_IL4_TREATED_ACT_CD4_TCELL_4H_UP	GSE2770_UNTREATED_VS_TGFB_AND_IL4_TREATED_ACT_CD4_TCELL_4H_UP		53	-0.260128	-1.09223	0.353846	0.548341	1	1642	tags=47%, list=34%, signal=70%
GSE7460_CTRL_VS_TGFB_TREATED_ACT_FOXP3_MUT_TCONV_UP	GSE7460_CTRL_VS_TGFB_TREATED_ACT_FOXP3_MUT_TCONV_UP		51	-0.262978	-1.03861	0.365079	0.622694	1	1084	tags=33%, list=22%, signal=42%
GSE21670_STAT3_KO_VS_WT_CD4_TCELL_TGFB_IL6_TREATED_UP	GSE21670_STAT3_KO_VS_WT_CD4_TCELL_TGFB_IL6_TREATED_UP		47	-0.274993	-1.07415	0.368421	0.572424	1	1319	tags=36%, list=27%, signal=49%
GSE7460_CTRL_VS_TGFB_TREATED_ACT_TCONV_UP	GSE7460_CTRL_VS_TGFB_TREATED_ACT_TCONV_UP		51	-0.269997	-1.11701	0.4	0.513168	1	789	tags=25%, list=16%, signal=30%
GSE21670_TGFB_VS_TGFB_AND_IL6_TREATED_STAT3_KO_CD4_TCELL_UP	GSE21670_TGFB_VS_TGFB_AND_IL6_TREATED_STAT3_KO_CD4_TCELL_UP		60	-0.268423	-1.05207	0.40625	0.603671	1	1169	tags=35%, list=24%, signal=45%
GSE7460_TREG_VS_TCONV_ACT_WITH_TGFB_UP	GSE7460_TREG_VS_TCONV_ACT_WITH_TGFB_UP		55	-0.243912	-1.02937	0.424242	0.635539	1	1189	tags=42%, list=24%, signal=55%
GSE45382_UNTREATED_VS_TGFB_TREATED_MACROPHAGES_UP	GSE45382_UNTREATED_VS_TGFB_TREATED_MACROPHAGES_UP		63	-0.246057	-1.02426	0.432836	0.643094	1	1639	tags=43%, list=34%, signal=64%
GSE43955_1H_VS_10H_ACT_CD4_TCELL_WITH_TGFB_IL6_UP	GSE43955_1H_VS_10H_ACT_CD4_TCELL_WITH_TGFB_IL6_UP		57	-0.256419	-1.03679	0.439394	0.625441	1	831	tags=21%, list=17%, signal=25%
GSE2770_IL12_VS_TGFB_AND_IL12_TREATED_ACT_CD4_TCELL_2H_DN	GSE2770_IL12_VS_TGFB_AND_IL12_TREATED_ACT_CD4_TCELL_2H_DN		32	-0.287523	-0.987297	0.444444	0.696713	1	764	tags=25%, list=16%, signal=29%
GSE21670_TGFB_VS_IL6_TREATED_STAT3_KO_CD4_TCELL_UP	GSE21670_TGFB_VS_IL6_TREATED_STAT3_KO_CD4_TCELL_UP		48	-0.247911	-0.988623	0.483333	0.694733	1	1401	tags=44%, list=29%, signal=61%
GSE23505_IL6_IL1_IL23_VS_IL6_IL1_TGFB_TREATED_CD4_TCELL_DN	GSE23505_IL6_IL1_IL23_VS_IL6_IL1_TGFB_TREATED_CD4_TCELL_DN		49	-0.249145	-0.955701	0.490566	0.740191	1	1513	tags=41%, list=31%, signal=59%
GSE2770_UNTREATED_VS_TGFB_AND_IL4_TREATED_ACT_CD4_TCELL_48H_DN	GSE2770_UNTREATED_VS_TGFB_AND_IL4_TREATED_ACT_CD4_TCELL_48H_DN		58	-0.241879	-0.981001	0.5	0.705355	1	1172	tags=36%, list=24%, signal=47%
GSE39820_TGFBETA1_IL6_VS_TGFBETA1_IL6_IL23A_TREATED_CD4_TCELL_UP	GSE39820_TGFBETA1_IL6_VS_TGFBETA1_IL6_IL23A_TREATED_CD4_TCELL_UP		59	-0.255163	-0.998897	0.513889	0.679331	1	2005	tags=71%, list=41%, signal=119%
GSE22025_UNTREATED_VS_TGFB1_AND_PROGESTERONE_TREATED_CD4_TCELL_DN	GSE22025_UNTREATED_VS_TGFB1_AND_PROGESTERONE_TREATED_CD4_TCELL_DN		45	-0.243356	-0.93168	0.514286	0.772775	1	399	tags=16%, list=8%, signal=17%
GSE2770_UNTREATED_VS_TGFB_AND_IL12_TREATED_ACT_CD4_TCELL_48H_DN	GSE2770_UNTREATED_VS_TGFB_AND_IL12_TREATED_ACT_CD4_TCELL_48H_DN		53	-0.238811	-0.94806	0.517857	0.750708	1	1799	tags=45%, list=37%, signal=71%
GSE39820_TGFBETA1_VS_TGFBETA3_IN_IL6_IL23A_TREATED_CD4_TCELL_DN	GSE39820_TGFBETA1_VS_TGFBETA3_IN_IL6_IL23A_TREATED_CD4_TCELL_DN		46	-0.238209	-0.913267	0.571429	0.797645	1	1402	tags=41%, list=29%, signal=57%
GSE43955_TGFB_IL6_VS_TGFB_IL6_IL23_TH17_ACT_CD4_TCELL_60H_UP	GSE43955_TGFB_IL6_VS_TGFB_IL6_IL23_TH17_ACT_CD4_TCELL_60H_UP		51	-0.229029	-0.912141	0.59322	0.798693	1	388	tags=14%, list=8%, signal=15%
GSE21670_UNTREATED_VS_TGFB_IL6_TREATED_CD4_TCELL_DN	GSE21670_UNTREATED_VS_TGFB_IL6_TREATED_CD4_TCELL_DN		42	-0.23155	-0.894621	0.607143	0.821339	1	434	tags=12%, list=9%, signal=13%
GSE7568_CTRL_VS_3H_TGFB_TREATED_MACROPHAGES_WITH_IL4_AND_DEXAMETHASONE_UP	GSE7568_CTRL_VS_3H_TGFB_TREATED_MACROPHAGES_WITH_IL4_AND_DEXAMETHASONE_UP		34	-0.248184	-0.913732	0.611111	0.797013	1	600	tags=21%, list=12%, signal=23%
GSE39820_TGFBETA3_IL6_VS_TGFBETA3_IL6_IL23A_TREATED_CD4_TCELL_DN	GSE39820_TGFBETA3_IL6_VS_TGFBETA3_IL6_IL23A_TREATED_CD4_TCELL_DN		55	-0.221821	-0.920482	0.612903	0.787762	1	611	tags=18%, list=13%, signal=21%
GSE2770_UNTREATED_VS_TGFB_AND_IL4_TREATED_ACT_CD4_TCELL_2H_DN	GSE2770_UNTREATED_VS_TGFB_AND_IL4_TREATED_ACT_CD4_TCELL_2H_DN		59	-0.215469	-0.894252	0.617647	0.821705	1	1034	tags=31%, list=21%, signal=38%
GSE43955_TH0_VS_TGFB_IL6_TH17_ACT_CD4_TCELL_52H_UP	GSE43955_TH0_VS_TGFB_IL6_TH17_ACT_CD4_TCELL_52H_UP		61	-0.213293	-0.878092	0.621212	0.841442	1	619	tags=18%, list=13%, signal=20%
GSE2770_TGFB_AND_IL4_ACT_VS_ACT_CD4_TCELL_48H_DN	GSE2770_TGFB_AND_IL4_ACT_VS_ACT_CD4_TCELL_48H_DN		57	-0.21574	-0.881317	0.646154	0.838146	1	1169	tags=33%, list=24%, signal=43%
GSE2770_UNTREATED_VS_TGFB_AND_IL12_TREATED_ACT_CD4_TCELL_6H_DN	GSE2770_UNTREATED_VS_TGFB_AND_IL12_TREATED_ACT_CD4_TCELL_6H_DN		55	-0.238882	-0.907573	0.650794	0.803626	1	1005	tags=29%, list=21%, signal=36%
GSE2770_IL12_AND_TGFB_ACT_VS_ACT_CD4_TCELL_6H_DN	GSE2770_IL12_AND_TGFB_ACT_VS_ACT_CD4_TCELL_6H_DN		65	-0.208188	-0.883629	0.652174	0.834537	1	787	tags=20%, list=16%, signal=24%
GSE21670_IL6_VS_TGFB_AND_IL6_TREATED_STAT3_KO_CD4_TCELL_DN	GSE21670_IL6_VS_TGFB_AND_IL6_TREATED_STAT3_KO_CD4_TCELL_DN		55	-0.229071	-0.87401	0.660377	0.84577	1	1431	tags=47%, list=29%, signal=66%
GSE2770_IL12_AND_TGFB_ACT_VS_ACT_CD4_TCELL_48H_UP	GSE2770_IL12_AND_TGFB_ACT_VS_ACT_CD4_TCELL_48H_UP		50	-0.21515	-0.853986	0.672727	0.86703	1	545	tags=16%, list=11%, signal=18%
GSE43955_1H_VS_42H_ACT_CD4_TCELL_WITH_TGFB_IL6_UP	GSE43955_1H_VS_42H_ACT_CD4_TCELL_WITH_TGFB_IL6_UP		33	-0.232545	-0.799018	0.683333	0.923248	1	500	tags=12%, list=10%, signal=13%
GSE2770_TGFB_AND_IL4_VS_IL12_TREATED_ACT_CD4_TCELL_6H_DN	GSE2770_TGFB_AND_IL4_VS_IL12_TREATED_ACT_CD4_TCELL_6H_DN		49	-0.211658	-0.878399	0.686567	0.841747	1	195	tags=6%, list=4%, signal=6%
GSE2770_IL12_AND_TGFB_VS_IL4_TREATED_ACT_CD4_TCELL_48H_UP	GSE2770_IL12_AND_TGFB_VS_IL4_TREATED_ACT_CD4_TCELL_48H_UP		49	-0.231272	-0.890735	0.688525	0.825928	1	1467	tags=45%, list=30%, signal=64%
GSE21670_STAT3_KO_VS_WT_CD4_TCELL_TGFB_TREATED_UP	GSE21670_STAT3_KO_VS_WT_CD4_TCELL_TGFB_TREATED_UP		61	-0.197448	-0.849684	0.714286	0.872114	1	995	tags=21%, list=20%, signal=26%
GSE2770_TGFB_AND_IL4_VS_TGFB_AND_IL12_TREATED_ACT_CD4_TCELL_2H_DN	GSE2770_TGFB_AND_IL4_VS_TGFB_AND_IL12_TREATED_ACT_CD4_TCELL_2H_DN		42	-0.234152	-0.893209	0.716667	0.822409	1	3752	tags=100%, list=77%, signal=427%
GSE23505_UNTREATED_VS_4DAY_IL6_IL1_TGFB_TREATED_CD4_TCELL_UP	GSE23505_UNTREATED_VS_4DAY_IL6_IL1_TGFB_TREATED_CD4_TCELL_UP		45	-0.198068	-0.809345	0.730159	0.915036	1	787	tags=22%, list=16%, signal=26%
GSE21670_TGFB_VS_TGFB_AND_IL6_TREATED_STAT3_KO_CD4_TCELL_DN	GSE21670_TGFB_VS_TGFB_AND_IL6_TREATED_STAT3_KO_CD4_TCELL_DN		67	-0.202484	-0.831334	0.736111	0.892578	1	793	tags=19%, list=16%, signal=23%
GSE39820_CTRL_VS_TGFBETA1_IL6_CD4_TCELL_UP	GSE39820_CTRL_VS_TGFBETA1_IL6_CD4_TCELL_UP		54	-0.211543	-0.858538	0.746032	0.86382	1	1014	tags=24%, list=21%, signal=30%
GSE39820_CTRL_VS_TGFBETA1_IL6_IL23A_CD4_TCELL_UP	GSE39820_CTRL_VS_TGFBETA1_IL6_IL23A_CD4_TCELL_UP		46	-0.203713	-0.808616	0.758621	0.915447	1	1630	tags=41%, list=33%, signal=61%
GSE7568_CTRL_VS_3H_TGFB_TREATED_MACROPHAGES_WITH_IL4_AND_DEXAMETHASONE_DN	GSE7568_CTRL_VS_3H_TGFB_TREATED_MACROPHAGES_WITH_IL4_AND_DEXAMETHASONE_DN		54	-0.203902	-0.835256	0.779412	0.888269	1	2090	tags=57%, list=43%, signal=99%
GSE2770_UNTREATED_VS_TGFB_AND_IL12_TREATED_ACT_CD4_TCELL_6H_UP	GSE2770_UNTREATED_VS_TGFB_AND_IL12_TREATED_ACT_CD4_TCELL_6H_UP		45	-0.202282	-0.813407	0.796296	0.910933	1	3530	tags=96%, list=72%, signal=341%
GSE39820_TGFBETA1_VS_TGFBETA3_IN_IL6_TREATED_CD4_TCELL_UP	GSE39820_TGFBETA1_VS_TGFBETA3_IN_IL6_TREATED_CD4_TCELL_UP		59	-0.1686	-0.717361	0.808824	0.980006	1	1883	tags=56%, list=39%, signal=90%
GSE23505_UNTREATED_VS_4DAY_IL6_IL1_TGFB_TREATED_CD4_TCELL_DN	GSE23505_UNTREATED_VS_4DAY_IL6_IL1_TGFB_TREATED_CD4_TCELL_DN		54	-0.193256	-0.775395	0.809524	0.942136	1	1726	tags=43%, list=35%, signal=65%
GSE43955_TH0_VS_TGFB_IL6_TH17_ACT_CD4_TCELL_60H_UP	GSE43955_TH0_VS_TGFB_IL6_TH17_ACT_CD4_TCELL_60H_UP		53	-0.178493	-0.768267	0.811321	0.947074	1	1224	tags=28%, list=25%, signal=37%
GSE2770_TGFB_AND_IL4_VS_IL4_TREATED_ACT_CD4_TCELL_2H_DN	GSE2770_TGFB_AND_IL4_VS_IL4_TREATED_ACT_CD4_TCELL_2H_DN		52	-0.18966	-0.763463	0.859649	0.950677	1	373	tags=10%, list=8%, signal=10%
GSE21670_TGFB_VS_TGFB_AND_IL6_TREATED_CD4_TCELL_DN	GSE21670_TGFB_VS_TGFB_AND_IL6_TREATED_CD4_TCELL_DN		55	-0.187365	-0.756219	0.867924	0.955148	1	1165	tags=25%, list=24%, signal=33%
GSE2770_UNTREATED_VS_TGFB_AND_IL4_TREATED_ACT_CD4_TCELL_2H_UP	GSE2770_UNTREATED_VS_TGFB_AND_IL4_TREATED_ACT_CD4_TCELL_2H_UP		40	-0.180702	-0.681464	0.882353	0.993742	1	1820	tags=52%, list=37%, signal=83%
GSE21670_IL6_VS_TGFB_AND_IL6_TREATED_CD4_TCELL_UP	GSE21670_IL6_VS_TGFB_AND_IL6_TREATED_CD4_TCELL_UP		55	-0.174887	-0.695979	0.893939	0.99092	1	568	tags=15%, list=12%, signal=16%
GSE21670_IL6_VS_TGFB_AND_IL6_TREATED_STAT3_KO_CD4_TCELL_UP	GSE21670_IL6_VS_TGFB_AND_IL6_TREATED_STAT3_KO_CD4_TCELL_UP		71	-0.167649	-0.725891	0.901408	0.975804	1	793	tags=14%, list=16%, signal=17%
GSE2770_UNTREATED_VS_TGFB_AND_IL12_TREATED_ACT_CD4_TCELL_48H_UP	GSE2770_UNTREATED_VS_TGFB_AND_IL12_TREATED_ACT_CD4_TCELL_48H_UP		48	-0.17995	-0.700701	0.901639	0.988111	1	1063	tags=25%, list=22%, signal=32%
GSE2770_IL12_AND_TGFB_ACT_VS_ACT_CD4_TCELL_48H_DN	GSE2770_IL12_AND_TGFB_ACT_VS_ACT_CD4_TCELL_48H_DN		62	-0.175234	-0.709574	0.906667	0.983708	1	217	tags=6%, list=4%, signal=7%
GSE39820_CTRL_VS_TGFBETA3_IL6_IL23A_CD4_TCELL_DN	GSE39820_CTRL_VS_TGFBETA3_IL6_IL23A_CD4_TCELL_DN		55	-0.159656	-0.672153	0.96875	0.997971	1	1067	tags=22%, list=22%, signal=28%
GSE22432_UNTREATED_VS_TGFB1_TREATED_COMMON_DC_PROGENITOR_UP	GSE22432_UNTREATED_VS_TGFB1_TREATED_COMMON_DC_PROGENITOR_UP		47	-0.15119	-0.574734	0.981132	1	1	1456	tags=38%, list=30%, signal=54%
GSE7460_CTRL_VS_TGFB_TREATED_ACT_FOXP3_HET_TCONV_UP	GSE7460_CTRL_VS_TGFB_TREATED_ACT_FOXP3_HET_TCONV_UP		70	-0.130993	-0.5519	0.982143	1	1	738	tags=13%, list=15%, signal=15%
GSE43955_TH0_VS_TGFB_IL6_TH17_ACT_CD4_TCELL_30H_DN	GSE43955_TH0_VS_TGFB_IL6_TH17_ACT_CD4_TCELL_30H_DN		44	-0.159918	-0.617781	0.982456	1	1	1353	tags=36%, list=28%, signal=50%
GSE2770_TGFB_AND_IL4_ACT_VS_ACT_CD4_TCELL_6H_DN	GSE2770_TGFB_AND_IL4_ACT_VS_ACT_CD4_TCELL_6H_DN		47	-0.153525	-0.582574	0.984127	1	1	1381	tags=34%, list=28%, signal=47%
GSE2770_TGFB_AND_IL4_VS_IL4_TREATED_ACT_CD4_TCELL_6H_DN	GSE2770_TGFB_AND_IL4_VS_IL4_TREATED_ACT_CD4_TCELL_6H_DN		50	-0.165482	-0.657365	0.984375	1	1	1549	tags=36%, list=32%, signal=52%
GSE2770_TGFB_AND_IL4_VS_IL4_TREATED_ACT_CD4_TCELL_6H_UP	GSE2770_TGFB_AND_IL4_VS_IL4_TREATED_ACT_CD4_TCELL_6H_UP		48	-0.114255	-0.456408	0.984615	1	1	649	tags=10%, list=13%, signal=12%
GSE2770_TGFB_AND_IL4_VS_TGFB_AND_IL12_TREATED_ACT_CD4_TCELL_6H_DN	GSE2770_TGFB_AND_IL4_VS_TGFB_AND_IL12_TREATED_ACT_CD4_TCELL_6H_DN		52	-0.148127	-0.612374	1	1	1	1597	tags=42%, list=33%, signal=62%
GSE2770_TGFB_AND_IL4_VS_IL4_TREATED_ACT_CD4_TCELL_48H_DN	GSE2770_TGFB_AND_IL4_VS_IL4_TREATED_ACT_CD4_TCELL_48H_DN		54	-0.125771	-0.506273	1	1	1	993	tags=20%, list=20%, signal=25%
GSE2770_UNTREATED_VS_TGFB_AND_IL12_TREATED_ACT_CD4_TCELL_2H_DN	GSE2770_UNTREATED_VS_TGFB_AND_IL12_TREATED_ACT_CD4_TCELL_2H_DN		64	-0.107805	-0.443397	1	1	1	1215	tags=22%, list=25%, signal=29%
GSE2770_IL12_AND_TGFB_ACT_VS_ACT_CD4_TCELL_2H_DN	GSE2770_IL12_AND_TGFB_ACT_VS_ACT_CD4_TCELL_2H_DN		48	-0.0955231	-0.375145	1	1	1	653	tags=10%, list=13%, signal=12%
HALLMARK_EPITHELIAL_MESENCHYMAL_TRANSITION	HALLMARK_EPITHELIAL_MESENCHYMAL_TRANSITION	Details ...	114	-0.761574	-3.66209	0	0	0	882	tags=82%, list=18%, signal=98%
SCHUETZ_BREAST_CANCER_DUCTAL_INVASIVE_UP	SCHUETZ_BREAST_CANCER_DUCTAL_INVASIVE_UP	Details ...	147	-0.716771	-3.61693	0	0	0	877	tags=75%, list=18%, signal=88%
ONDER_CDH1_TARGETS_2_UP	ONDER_CDH1_TARGETS_2_UP	Details ...	117	-0.704813	-3.47583	0	0	0	877	tags=69%, list=18%, signal=82%
MURARO_PANCREAS_MESENCHYMAL_STROMAL_CELL	MURARO_PANCREAS_MESENCHYMAL_STROMAL_CELL	Details ...	306	-0.642623	-3.36255	0	0	0	1167	tags=69%, list=24%, signal=85%
ANASTASSIOU_MULTICANCER_INVASIVENESS_SIGNATURE	ANASTASSIOU_MULTICANCER_INVASIVENESS_SIGNATURE	Details ...	43	-0.832417	-3.33867	0	0	0	590	tags=86%, list=12%, signal=97%
CHICAS_RB1_TARGETS_CONFLUENT	CHICAS_RB1_TARGETS_CONFLUENT	Details ...	245	-0.642698	-3.29392	0	0	0	753	tags=55%, list=15%, signal=61%
MODULE_47	MODULE_47	Details ...	114	-0.713868	-3.27473	0	0	0	881	tags=72%, list=18%, signal=86%
REN_ALVEOLAR_RHABDOMYOSARCOMA_DN	REN_ALVEOLAR_RHABDOMYOSARCOMA_DN	Details ...	231	-0.628273	-3.20225	0	0	0	1384	tags=73%, list=28%, signal=97%
GAO_LARGE_INTESTINE_ADULT_CJ_IMMUNE_CELLS	GAO_LARGE_INTESTINE_ADULT_CJ_IMMUNE_CELLS	Details ...	181	-0.629375	-3.19523	0	0	0	877	tags=62%, list=18%, signal=73%
CHARAFE_BREAST_CANCER_LUMINAL_VS_MESENCHYMAL_DN	CHARAFE_BREAST_CANCER_LUMINAL_VS_MESENCHYMAL_DN	Details ...	216	-0.631205	-3.18884	0	0	0	948	tags=59%, list=19%, signal=70%
DURANTE_ADULT_OLFACTORY_NEUROEPITHELIUM_FIBROBLASTS_STROMAL_CELLS	DURANTE_ADULT_OLFACTORY_NEUROEPITHELIUM_FIBROBLASTS_STROMAL_CELLS	Details ...	45	-0.779161	-3.15014	0	0	0	881	tags=89%, list=18%, signal=107%
AIZARANI_LIVER_C21_STELLATE_CELLS_1	AIZARANI_LIVER_C21_STELLATE_CELLS_1	Details ...	96	-0.68821	-3.1252	0	0	0	882	tags=74%, list=18%, signal=88%
CHARAFE_BREAST_CANCER_LUMINAL_VS_BASAL_DN	CHARAFE_BREAST_CANCER_LUMINAL_VS_BASAL_DN	Details ...	199	-0.614291	-3.12415	0	0	0	1132	tags=65%, list=23%, signal=81%
DESCARTES_FETAL_CEREBRUM_VASCULAR_ENDOTHELIAL_CELLS	DESCARTES_FETAL_CEREBRUM_VASCULAR_ENDOTHELIAL_CELLS	Details ...	140	-0.623217	-3.07187	0	0	0	753	tags=52%, list=15%, signal=60%
VERHAAK_GLIOBLASTOMA_MESENCHYMAL	VERHAAK_GLIOBLASTOMA_MESENCHYMAL	Details ...	107	-0.685494	-3.05267	0	0	0	902	tags=69%, list=18%, signal=83%
BLANCO_MELO_BETA_INTERFERON_TREATED_BRONCHIAL_EPITHELIAL_CELLS_UP	BLANCO_MELO_BETA_INTERFERON_TREATED_BRONCHIAL_EPITHELIAL_CELLS_UP	Details ...	117	-0.630267	-3.04603	0	0	0	788	tags=57%, list=16%, signal=67%
CUI_DEVELOPING_HEART_C3_FIBROBLAST_LIKE_CELL	CUI_DEVELOPING_HEART_C3_FIBROBLAST_LIKE_CELL	Details ...	58	-0.730285	-3.03163	0	0	0	862	tags=83%, list=18%, signal=99%
MIYAGAWA_TARGETS_OF_EWSR1_ETS_FUSIONS_DN	MIYAGAWA_TARGETS_OF_EWSR1_ETS_FUSIONS_DN	Details ...	105	-0.681181	-3.01905	0	0	0	837	tags=68%, list=17%, signal=80%
BLANCO_MELO_RESPIRATORY_SYNCYTIAL_VIRUS_INFECTION_A594_CELLS_UP	BLANCO_MELO_RESPIRATORY_SYNCYTIAL_VIRUS_INFECTION_A594_CELLS_UP	Details ...	95	-0.686734	-3.00935	0	0	0	807	tags=69%, list=17%, signal=82%
TURASHVILI_BREAST_LOBULAR_CARCINOMA_VS_DUCTAL_NORMAL_UP	TURASHVILI_BREAST_LOBULAR_CARCINOMA_VS_DUCTAL_NORMAL_UP	Details ...	31	-0.811965	-2.99776	0	0	0	391	tags=68%, list=8%, signal=73%
DESCARTES_FETAL_ADRENAL_STROMAL_CELLS	DESCARTES_FETAL_ADRENAL_STROMAL_CELLS	Details ...	46	-0.785234	-2.99224	0	0	0	450	tags=76%, list=9%, signal=83%
SENESE_HDAC1_AND_HDAC2_TARGETS_DN	SENESE_HDAC1_AND_HDAC2_TARGETS_DN	Details ...	85	-0.690126	-2.97313	0	0	0	657	tags=62%, list=13%, signal=71%
WU_CELL_MIGRATION	WU_CELL_MIGRATION	Details ...	68	-0.709246	-2.97274	0	0	0	881	tags=74%, list=18%, signal=88%
HAY_BONE_MARROW_STROMAL	HAY_BONE_MARROW_STROMAL	Details ...	253	-0.561801	-2.97189	0	0	0	876	tags=56%, list=18%, signal=65%
PETROVA_ENDOTHELIUM_LYMPHATIC_VS_BLOOD_DN	PETROVA_ENDOTHELIUM_LYMPHATIC_VS_BLOOD_DN	Details ...	74	-0.670668	-2.96292	0	0	0	657	tags=61%, list=13%, signal=69%
DESCARTES_FETAL_EYE_STROMAL_CELLS	DESCARTES_FETAL_EYE_STROMAL_CELLS	Details ...	48	-0.787648	-2.95699	0	0	0	753	tags=85%, list=15%, signal=100%
NUYTTEN_EZH2_TARGETS_UP	NUYTTEN_EZH2_TARGETS_UP	Details ...	330	-0.543772	-2.90914	0	0	0	1454	tags=68%, list=30%, signal=90%
PICCALUGA_ANGIOIMMUNOBLASTIC_LYMPHOMA_UP	PICCALUGA_ANGIOIMMUNOBLASTIC_LYMPHOMA_UP	Details ...	82	-0.706285	-2.8998	0	0	0	599	tags=65%, list=12%, signal=72%
HUANG_DASATINIB_SENSITIVITY_UP	HUANG_DASATINIB_SENSITIVITY_UP	Details ...	47	-0.724646	-2.89809	0	0	0	702	tags=68%, list=14%, signal=79%
DESCARTES_FETAL_THYMUS_STROMAL_CELLS	DESCARTES_FETAL_THYMUS_STROMAL_CELLS	Details ...	68	-0.675637	-2.88985	0	0	0	629	tags=63%, list=13%, signal=72%
PASINI_SUZ12_TARGETS_DN	PASINI_SUZ12_TARGETS_DN	Details ...	144	-0.592363	-2.88177	0	0	0	1009	tags=59%, list=21%, signal=72%
MANNO_MIDBRAIN_NEUROTYPES_HPERIC	MANNO_MIDBRAIN_NEUROTYPES_HPERIC	Details ...	297	-0.548799	-2.88091	0	0	0	976	tags=57%, list=20%, signal=67%
DESCARTES_FETAL_CEREBELLUM_VASCULAR_ENDOTHELIAL_CELLS	DESCARTES_FETAL_CEREBELLUM_VASCULAR_ENDOTHELIAL_CELLS	Details ...	178	-0.58788	-2.8661	0	0	0	976	tags=58%, list=20%, signal=70%
SWEET_KRAS_TARGETS_UP	SWEET_KRAS_TARGETS_UP	Details ...	42	-0.748455	-2.85314	0	0	0	896	tags=81%, list=18%, signal=98%
KIM_GLIS2_TARGETS_UP	KIM_GLIS2_TARGETS_UP	Details ...	34	-0.759667	-2.85119	0	0	0	499	tags=65%, list=10%, signal=72%
HU_FETAL_RETINA_FIBROBLAST	HU_FETAL_RETINA_FIBROBLAST	Details ...	169	-0.579983	-2.85067	0	0	0	1238	tags=72%, list=25%, signal=93%
BOQUEST_STEM_CELL_UP	BOQUEST_STEM_CELL_UP	Details ...	111	-0.630198	-2.85065	0	0	0	689	tags=64%, list=14%, signal=73%
TRAVAGLINI_LUNG_ALVEOLAR_EPITHELIAL_TYPE_1_CELL	TRAVAGLINI_LUNG_ALVEOLAR_EPITHELIAL_TYPE_1_CELL	Details ...	160	-0.563059	-2.84566	0	0	0	1169	tags=62%, list=24%, signal=79%
MODULE_1	MODULE_1	Details ...	153	-0.574833	-2.84322	0	0	0	873	tags=57%, list=18%, signal=67%
ONDER_CDH1_SIGNALING_VIA_CTNNB1	ONDER_CDH1_SIGNALING_VIA_CTNNB1	Details ...	44	-0.718498	-2.82527	0	0	0	740	tags=73%, list=15%, signal=85%
MEBARKI_HCC_PROGENITOR_WNT_UP	MEBARKI_HCC_PROGENITOR_WNT_UP	Details ...	76	-0.640186	-2.81265	0	0	0	648	tags=59%, list=13%, signal=67%
WIEDERSCHAIN_TARGETS_OF_BMI1_AND_PCGF2	WIEDERSCHAIN_TARGETS_OF_BMI1_AND_PCGF2	Details ...	24	-0.816116	-2.81139	0	0	0	420	tags=75%, list=9%, signal=82%
SENESE_HDAC2_TARGETS_DN	SENESE_HDAC2_TARGETS_DN	Details ...	44	-0.719892	-2.81005	0	0	0	642	tags=66%, list=13%, signal=75%
LINDGREN_BLADDER_CANCER_CLUSTER_2B	LINDGREN_BLADDER_CANCER_CLUSTER_2B	Details ...	134	-0.578288	-2.80907	0	0	0	781	tags=52%, list=16%, signal=60%
PID_INTEGRIN1_PATHWAY	PID_INTEGRIN1_PATHWAY	Details ...	33	-0.757211	-2.80276	0	0	0	689	tags=76%, list=14%, signal=88%
BLANCO_MELO_HUMAN_PARAINFLUENZA_VIRUS_3_INFECTION_A594_CELLS_UP	BLANCO_MELO_HUMAN_PARAINFLUENZA_VIRUS_3_INFECTION_A594_CELLS_UP	Details ...	64	-0.630491	-2.80031	0	0	0	1097	tags=72%, list=22%, signal=91%
GOMF_EXTRACELLULAR_MATRIX_STRUCTURAL_CONSTITUENT	GOMF_EXTRACELLULAR_MATRIX_STRUCTURAL_CONSTITUENT	Details ...	59	-0.69428	-2.79812	0	0	0	409	tags=61%, list=8%, signal=66%
WANG_SMARCE1_TARGETS_UP	WANG_SMARCE1_TARGETS_UP	Details ...	122	-0.603017	-2.7974	0	0	0	658	tags=52%, list=13%, signal=58%
TRAVAGLINI_LUNG_ADVENTITIAL_FIBROBLAST_CELL	TRAVAGLINI_LUNG_ADVENTITIAL_FIBROBLAST_CELL	Details ...	136	-0.587995	-2.79257	0	0	0	863	tags=60%, list=18%, signal=70%
BROWNE_HCMV_INFECTION_24HR_DN	BROWNE_HCMV_INFECTION_24HR_DN	Details ...	63	-0.618062	-2.78837	0	0	0	877	tags=57%, list=18%, signal=69%
RODWELL_AGING_KIDNEY_UP	RODWELL_AGING_KIDNEY_UP	Details ...	147	-0.559921	-2.7878	0	0	0	1022	tags=56%, list=21%, signal=68%
GSE42021_TREG_PLN_VS_CD24INT_TREG_THYMUS_DN	GSE42021_TREG_PLN_VS_CD24INT_TREG_THYMUS_DN	Details ...	83	-0.612974	-2.78214	0	0	0	1097	tags=60%, list=22%, signal=76%
MODULE_5	MODULE_5	Details ...	146	-0.5792	-2.78156	0	0	0	1132	tags=66%, list=23%, signal=84%
LIU_PROSTATE_CANCER_DN	LIU_PROSTATE_CANCER_DN	Details ...	185	-0.562778	-2.77737	0	0	0	690	tags=50%, list=14%, signal=56%
RUBENSTEIN_SKELETAL_MUSCLE_FAP_CELLS	RUBENSTEIN_SKELETAL_MUSCLE_FAP_CELLS	Details ...	74	-0.637068	-2.77216	0	0	0	689	tags=51%, list=14%, signal=59%
NAKAYAMA_SOFT_TISSUE_TUMORS_PCA1_UP	NAKAYAMA_SOFT_TISSUE_TUMORS_PCA1_UP	Details ...	24	-0.804655	-2.76658	0	0	0	649	tags=83%, list=13%, signal=96%
DUTERTRE_ESTRADIOL_RESPONSE_24HR_DN	DUTERTRE_ESTRADIOL_RESPONSE_24HR_DN	Details ...	188	-0.552183	-2.75106	0	0	0	1453	tags=72%, list=30%, signal=98%
RODWELL_AGING_KIDNEY_NO_BLOOD_UP	RODWELL_AGING_KIDNEY_NO_BLOOD_UP	Details ...	76	-0.655705	-2.7411	0	0	0	676	tags=54%, list=14%, signal=62%
MEL18_DN.V1_UP	MEL18_DN.V1_UP	Details ...	58	-0.627917	-2.72383	0	0	0	832	tags=64%, list=17%, signal=76%
TURASHVILI_BREAST_LOBULAR_CARCINOMA_VS_LOBULAR_NORMAL_DN	TURASHVILI_BREAST_LOBULAR_CARCINOMA_VS_LOBULAR_NORMAL_DN	Details ...	36	-0.734613	-2.69301	0	0	0	476	tags=56%, list=10%, signal=61%
GOCC_COLLAGEN_CONTAINING_EXTRACELLULAR_MATRIX	GOCC_COLLAGEN_CONTAINING_EXTRACELLULAR_MATRIX	Details ...	131	-0.544067	-2.69298	0	0	0	594	tags=50%, list=12%, signal=55%
ZWANG_CLASS_1_TRANSIENTLY_INDUCED_BY_EGF	ZWANG_CLASS_1_TRANSIENTLY_INDUCED_BY_EGF	Details ...	148	-0.539206	-2.69132	0	0	0	1477	tags=71%, list=30%, signal=99%
ESC_V6.5_UP_EARLY.V1_DN	ESC_V6.5_UP_EARLY.V1_DN	Details ...	61	-0.618337	-2.68993	0	0	0	563	tags=52%, list=12%, signal=59%
MODULE_46	MODULE_46	Details ...	93	-0.590627	-2.68012	0	0	0	803	tags=56%, list=16%, signal=66%
PETROVA_PROX1_TARGETS_DN	PETROVA_PROX1_TARGETS_DN	Details ...	28	-0.767307	-2.67942	0	0	0	582	tags=68%, list=12%, signal=77%
CLASPER_LYMPHATIC_VESSELS_DURING_METASTASIS_DN	CLASPER_LYMPHATIC_VESSELS_DURING_METASTASIS_DN	Details ...	23	-0.772403	-2.67672	0	0	0	689	tags=83%, list=14%, signal=96%
BLANCO_MELO_COVID19_BRONCHIAL_EPITHELIAL_CELLS_SARS_COV_2_INFECTION_UP	BLANCO_MELO_COVID19_BRONCHIAL_EPITHELIAL_CELLS_SARS_COV_2_INFECTION_UP	Details ...	39	-0.69174	-2.67428	0	0	0	788	tags=69%, list=16%, signal=82%
GAO_LARGE_INTESTINE_24W_C1_DCLK1POS_PROGENITOR	GAO_LARGE_INTESTINE_24W_C1_DCLK1POS_PROGENITOR	Details ...	46	-0.709112	-2.6724	0	0	0	590	tags=65%, list=12%, signal=73%
RICKMAN_TUMOR_DIFFERENTIATED_WELL_VS_POORLY_DN	RICKMAN_TUMOR_DIFFERENTIATED_WELL_VS_POORLY_DN	Details ...	130	-0.557804	-2.66899	0	0	0	1576	tags=77%, list=32%, signal=111%
MODULE_38	MODULE_38	Details ...	150	-0.542987	-2.66439	0	0	0	1024	tags=57%, list=21%, signal=69%
BERTUCCI_MEDULLARY_VS_DUCTAL_BREAST_CANCER_DN	BERTUCCI_MEDULLARY_VS_DUCTAL_BREAST_CANCER_DN	Details ...	67	-0.603273	-2.66408	0	0	0	1032	tags=67%, list=21%, signal=84%
DESCARTES_FETAL_MUSCLE_STROMAL_CELLS	DESCARTES_FETAL_MUSCLE_STROMAL_CELLS	Details ...	27	-0.760369	-2.66387	0	0	0	492	tags=70%, list=10%, signal=78%
VECCHI_GASTRIC_CANCER_ADVANCED_VS_EARLY_UP	VECCHI_GASTRIC_CANCER_ADVANCED_VS_EARLY_UP	Details ...	69	-0.651187	-2.66162	0	0	0	598	tags=57%, list=12%, signal=63%
DANG_REGULATED_BY_MYC_DN	DANG_REGULATED_BY_MYC_DN	Details ...	100	-0.554035	-2.65809	0	0	0	1131	tags=58%, list=23%, signal=74%
GOCC_CELL_SUBSTRATE_JUNCTION	GOCC_CELL_SUBSTRATE_JUNCTION	Details ...	174	-0.529265	-2.65643	0	0	0	1212	tags=56%, list=25%, signal=72%
KINSEY_TARGETS_OF_EWSR1_FLII_FUSION_DN	KINSEY_TARGETS_OF_EWSR1_FLII_FUSION_DN	Details ...	121	-0.542276	-2.65545	0	0	0	937	tags=51%, list=19%, signal=62%
TRAVAGLINI_LUNG_VASCULAR_SMOOTH_MUSCLE_CELL	TRAVAGLINI_LUNG_VASCULAR_SMOOTH_MUSCLE_CELL	Details ...	29	-0.73082	-2.65493	0	0	0	882	tags=79%, list=18%, signal=96%
CUI_DEVELOPING_HEART_C6_EPICARDIAL_CELL	CUI_DEVELOPING_HEART_C6_EPICARDIAL_CELL	Details ...	67	-0.649763	-2.65163	0	0	0	873	tags=64%, list=18%, signal=77%
GSE37533_PPARG1_FOXP3_VS_FOXP3_TRANSDUCED_CD4_TCELL_DN	GSE37533_PPARG1_FOXP3_VS_FOXP3_TRANSDUCED_CD4_TCELL_DN	Details ...	73	-0.617766	-2.64942	0	0	0	1100	tags=67%, list=23%, signal=85%
WINZEN_DEGRADED_VIA_KHSRP	WINZEN_DEGRADED_VIA_KHSRP	Details ...	35	-0.703893	-2.64802	0	0	0	806	tags=69%, list=16%, signal=82%
HALLMARK_UV_RESPONSE_DN	HALLMARK_UV_RESPONSE_DN	Details ...	60	-0.652272	-2.6473	0	0	0	1010	tags=65%, list=21%, signal=81%
XIE_ST_HSC_S1PR3_OE_UP	XIE_ST_HSC_S1PR3_OE_UP	Details ...	53	-0.654247	-2.64147	0	0	0	650	tags=64%, list=13%, signal=73%
JINESH_BLEBBISHIELD_TO_IMMUNE_CELL_FUSION_PBSHMS_UP	JINESH_BLEBBISHIELD_TO_IMMUNE_CELL_FUSION_PBSHMS_UP	Details ...	138	-0.533428	-2.64002	0	0	0	1149	tags=57%, list=24%, signal=72%
GSE42021_CD24HI_VS_CD24INT_TREG_THYMUS_DN	GSE42021_CD24HI_VS_CD24INT_TREG_THYMUS_DN	Details ...	77	-0.618904	-2.63828	0	0	0	1400	tags=77%, list=29%, signal=106%
CHIANG_LIVER_CANCER_SUBCLASS_CTNNB1_DN	CHIANG_LIVER_CANCER_SUBCLASS_CTNNB1_DN	Details ...	60	-0.642899	-2.63735	0	0	0	629	tags=55%, list=13%, signal=62%
AZARE_NEOPLASTIC_TRANSFORMATION_BY_STAT3_UP	AZARE_NEOPLASTIC_TRANSFORMATION_BY_STAT3_UP	Details ...	52	-0.636279	-2.62846	0	0	0	582	tags=50%, list=12%, signal=56%
GOBP_RESPONSE_TO_TRANSFORMING_GROWTH_FACTOR_BETA	GOBP_RESPONSE_TO_TRANSFORMING_GROWTH_FACTOR_BETA	Details ...	84	-0.577861	-2.62836	0	0	0	1020	tags=58%, list=21%, signal=72%
BMI1_DN_MEL18_DN.V1_UP	BMI1_DN_MEL18_DN.V1_UP	Details ...	57	-0.654809	-2.62667	0	0	0	832	tags=68%, list=17%, signal=82%
HP_ABNORMAL_ATRIOVENTRICULAR_VALVE_MORPHOLOGY	HP_ABNORMAL_ATRIOVENTRICULAR_VALVE_MORPHOLOGY	Details ...	40	-0.660347	-2.62588	0	0	0	648	tags=50%, list=13%, signal=57%
P53_DN.V1_UP	P53_DN.V1_UP	Details ...	77	-0.608637	-2.62417	0	0	0	577	tags=49%, list=12%, signal=55%
DESCARTES_MAIN_FETAL_IGFBP1_DKK1_POSITIVE_CELLS	DESCARTES_MAIN_FETAL_IGFBP1_DKK1_POSITIVE_CELLS	Details ...	56	-0.663817	-2.62408	0	0	0	650	tags=61%, list=13%, signal=69%
TRAVAGLINI_LUNG_ALVEOLAR_FIBROBLAST_CELL	TRAVAGLINI_LUNG_ALVEOLAR_FIBROBLAST_CELL	Details ...	49	-0.635394	-2.62345	0	0	0	624	tags=57%, list=13%, signal=65%
GOBP_WOUND_HEALING	GOBP_WOUND_HEALING	Details ...	141	-0.569547	-2.62086	0	0	0	763	tags=49%, list=16%, signal=56%
AIZARANI_LIVER_C39_EPCAM_POS_BILE_DUCT_CELLS_4	AIZARANI_LIVER_C39_EPCAM_POS_BILE_DUCT_CELLS_4	Details ...	88	-0.594252	-2.61819	0	0	0	1045	tags=65%, list=21%, signal=81%
GNF2_PTX3	GNF2_PTX3	Details ...	25	-0.766644	-2.61817	0	0	0	976	tags=88%, list=20%, signal=109%
GSE42021_CD24HI_VS_CD24LOW_TCONV_THYMUS_DN	GSE42021_CD24HI_VS_CD24LOW_TCONV_THYMUS_DN	Details ...	71	-0.608707	-2.61737	0	0	0	823	tags=54%, list=17%, signal=63%
MODULE_75	MODULE_75	Details ...	93	-0.590747	-2.61663	0	0	0	787	tags=56%, list=16%, signal=65%
NABA_MATRISOME	NABA_MATRISOME	Details ...	217	-0.519647	-2.61241	0	0	0	874	tags=56%, list=18%, signal=65%
DESCARTES_FETAL_KIDNEY_STROMAL_CELLS	DESCARTES_FETAL_KIDNEY_STROMAL_CELLS	Details ...	52	-0.627801	-2.61202	0	0	0	492	tags=58%, list=10%, signal=63%
AIZARANI_LIVER_C29_MVECS_2	AIZARANI_LIVER_C29_MVECS_2	Details ...	123	-0.559845	-2.60841	0	0	0	1027	tags=61%, list=21%, signal=75%
SANA_TNF_SIGNALING_UP	SANA_TNF_SIGNALING_UP	Details ...	31	-0.706624	-2.60737	0	0	0	788	tags=68%, list=16%, signal=80%
WESTON_VEGFA_TARGETS_6HR	WESTON_VEGFA_TARGETS_6HR	Details ...	23	-0.735671	-2.6031	0	0	0	619	tags=65%, list=13%, signal=74%
LANDIS_ERBB2_BREAST_TUMORS_324_DN	LANDIS_ERBB2_BREAST_TUMORS_324_DN	Details ...	57	-0.615537	-2.60197	0	0	0	511	tags=39%, list=10%, signal=43%
HALLMARK_COAGULATION	HALLMARK_COAGULATION	Details ...	38	-0.681031	-2.59864	0	0	0	1009	tags=76%, list=21%, signal=95%
JOHNSTONE_PARVB_TARGETS_3_UP	JOHNSTONE_PARVB_TARGETS_3_UP	Details ...	145	-0.546682	-2.59221	0	0	0	1316	tags=66%, list=27%, signal=87%
RUBENSTEIN_SKELETAL_MUSCLE_FBN1_FAP_CELLS	RUBENSTEIN_SKELETAL_MUSCLE_FBN1_FAP_CELLS	Details ...	122	-0.551471	-2.59218	0	0	0	1199	tags=60%, list=25%, signal=77%
OISHI_CHOLANGIOMA_STEM_CELL_LIKE_DN	OISHI_CHOLANGIOMA_STEM_CELL_LIKE_DN	Details ...	96	-0.585069	-2.59033	0	0	0	1131	tags=66%, list=23%, signal=84%
ELVIDGE_HYPOXIA_UP	ELVIDGE_HYPOXIA_UP	Details ...	65	-0.569411	-2.5897	0	0	0	1122	tags=66%, list=23%, signal=85%
KOINUMA_TARGETS_OF_SMAD2_OR_SMAD3	KOINUMA_TARGETS_OF_SMAD2_OR_SMAD3	Details ...	285	-0.495065	-2.58035	0	0	0	1172	tags=48%, list=24%, signal=60%
CAIRO_HEPATOBLASTOMA_CLASSES_DN	CAIRO_HEPATOBLASTOMA_CLASSES_DN	Details ...	74	-0.608345	-2.58033	0	0	0	1009	tags=59%, list=21%, signal=74%
ZHU_CMV_24_HR_DN	ZHU_CMV_24_HR_DN	Details ...	39	-0.695711	-2.57756	0	0	0	793	tags=67%, list=16%, signal=79%
IZADPANAH_STEM_CELL_ADIPOSE_VS_BONE_DN	IZADPANAH_STEM_CELL_ADIPOSE_VS_BONE_DN	Details ...	40	-0.659282	-2.5768	0	0	0	589	tags=60%, list=12%, signal=68%
ONDER_CDH1_TARGETS_1_DN	ONDER_CDH1_TARGETS_1_DN	Details ...	48	-0.615852	-2.56854	0	0	0	732	tags=44%, list=15%, signal=51%
ZHU_CMV_ALL_DN	ZHU_CMV_ALL_DN	Details ...	48	-0.676163	-2.56389	0	0	0	793	tags=60%, list=16%, signal=71%
BEGUM_TARGETS_OF_PAX3_FOXO1_FUSION_DN	BEGUM_TARGETS_OF_PAX3_FOXO1_FUSION_DN	Details ...	19	-0.836005	-2.56175	0	0	0	818	tags=100%, list=17%, signal=120%
ELVIDGE_HIF1A_AND_HIF2A_TARGETS_DN	ELVIDGE_HIF1A_AND_HIF2A_TARGETS_DN	Details ...	42	-0.645625	-2.55641	0	0	0	1122	tags=74%, list=23%, signal=95%
BMI1_DN.V1_UP	BMI1_DN.V1_UP	Details ...	55	-0.627107	-2.55459	0	0	0	832	tags=62%, list=17%, signal=74%
MODULE_128	MODULE_128	Details ...	35	-0.686873	-2.55327	0	0	0	943	tags=71%, list=19%, signal=88%
SASAI_RESISTANCE_TO_NEOPLASTIC_TRANSFROMATION	SASAI_RESISTANCE_TO_NEOPLASTIC_TRANSFROMATION	Details ...	25	-0.753339	-2.55045	0	0	0	542	tags=64%, list=11%, signal=72%
LEI_MYB_TARGETS	LEI_MYB_TARGETS	Details ...	134	-0.520897	-2.54647	0	0	0	956	tags=44%, list=20%, signal=53%
LANDIS_BREAST_CANCER_PROGRESSION_DN	LANDIS_BREAST_CANCER_PROGRESSION_DN	Details ...	33	-0.734734	-2.54573	0	0	0	511	tags=58%, list=10%, signal=64%
DESCARTES_FETAL_LUNG_MESOTHELIAL_CELLS	DESCARTES_FETAL_LUNG_MESOTHELIAL_CELLS	Details ...	22	-0.693687	-2.54291	0	0	0	619	tags=68%, list=13%, signal=78%
FAN_EMBRYONIC_CTX_BIG_GROUPS_BRAIN_ENDOTHELIAL	FAN_EMBRYONIC_CTX_BIG_GROUPS_BRAIN_ENDOTHELIAL	Details ...	145	-0.518256	-2.54055	0	0	0	1238	tags=65%, list=25%, signal=84%
AMIT_SERUM_RESPONSE_240_MCF10A	AMIT_SERUM_RESPONSE_240_MCF10A	Details ...	23	-0.7522	-2.53679	0	0	0	306	tags=52%, list=6%, signal=55%
GSE42021_TREG_PLN_VS_TREG_PRECURSORS_THYMUS_DN	GSE42021_TREG_PLN_VS_TREG_PRECURSORS_THYMUS_DN	Details ...	79	-0.589435	-2.53576	0	0	0	1082	tags=62%, list=22%, signal=78%
GOBP_NEGATIVE_REGULATION_OF_WOUND_HEALING	GOBP_NEGATIVE_REGULATION_OF_WOUND_HEALING	Details ...	20	-0.784741	-2.5352	0	0	0	345	tags=65%, list=7%, signal=70%
SASSON_RESPONSE_TO_FORSKOLIN_DN	SASSON_RESPONSE_TO_FORSKOLIN_DN	Details ...	41	-0.620074	-2.53285	0	0	0	822	tags=49%, list=17%, signal=58%
REACTOME_INTEGRIN_CELL_SURFACE_INTERACTIONS	REACTOME_INTEGRIN_CELL_SURFACE_INTERACTIONS	Details ...	34	-0.675037	-2.52473	0	0	0	738	tags=68%, list=15%, signal=79%
MEBARKI_HCC_PROGENITOR_WNT_UP_CTNNB1_DEPENDENT_BLOCKED_BY_FZD8CRD	MEBARKI_HCC_PROGENITOR_WNT_UP_CTNNB1_DEPENDENT_BLOCKED_BY_FZD8CRD	Details ...	17	-0.77687	-2.52333	0	0	0	611	tags=76%, list=13%, signal=87%
MODULE_324	MODULE_324	Details ...	41	-0.64669	-2.52235	0	0	0	855	tags=68%, list=18%, signal=82%
GSE16755_CTRL_VS_IFNA_TREATED_MAC_DN	GSE16755_CTRL_VS_IFNA_TREATED_MAC_DN	Details ...	69	-0.559245	-2.52232	0	0	0	1382	tags=67%, list=28%, signal=92%
GSE42021_CD24INT_VS_CD24LOW_TCONV_THYMUS_DN	GSE42021_CD24INT_VS_CD24LOW_TCONV_THYMUS_DN	Details ...	67	-0.615309	-2.52167	0	0	0	1116	tags=67%, list=23%, signal=86%
MEBARKI_HCC_PROGENITOR_WNT_UP_BLOCKED_BY_FZD8CRD	MEBARKI_HCC_PROGENITOR_WNT_UP_BLOCKED_BY_FZD8CRD	Details ...	48	-0.634928	-2.51611	0	0	0	648	tags=58%, list=13%, signal=67%
WINTER_HYPOXIA_METAGENE	WINTER_HYPOXIA_METAGENE	Details ...	99	-0.546722	-2.51604	0	0	0	1187	tags=60%, list=24%, signal=77%
GOMF_COLLAGEN_BINDING	GOMF_COLLAGEN_BINDING	Details ...	26	-0.685061	-2.5159	0	0	0	753	tags=77%, list=15%, signal=90%
HELLEBREKERS_SILENCED_DURING_TUMOR_ANGIOGENESIS	HELLEBREKERS_SILENCED_DURING_TUMOR_ANGIOGENESIS	Details ...	36	-0.669795	-2.51154	0	0	0	1122	tags=75%, list=23%, signal=97%
GOBP_REGULATION_OF_COAGULATION	GOBP_REGULATION_OF_COAGULATION	Details ...	22	-0.760976	-2.5074	0	0	0	430	tags=68%, list=9%, signal=74%
MANNO_MIDBRAIN_NEUROTYPES_HENDO	MANNO_MIDBRAIN_NEUROTYPES_HENDO	Details ...	307	-0.474963	-2.50315	0	0	0	1242	tags=59%, list=25%, signal=74%
SWEET_LUNG_CANCER_KRAS_DN	SWEET_LUNG_CANCER_KRAS_DN	Details ...	130	-0.526958	-2.50124	0	0	0	800	tags=48%, list=16%, signal=56%
FLETCHER_PBMC_BCG_10W_INFANT_BCG_STIMULATED_VS_UNSTIMULATED_10W_DN	FLETCHER_PBMC_BCG_10W_INFANT_BCG_STIMULATED_VS_UNSTIMULATED_10W_DN	Details ...	85	-0.559219	-2.50112	0	0	0	1031	tags=60%, list=21%, signal=75%
DESCARTES_FETAL_STOMACH_STROMAL_CELLS	DESCARTES_FETAL_STOMACH_STROMAL_CELLS	Details ...	21	-0.79304	-2.50054	0	0	0	333	tags=71%, list=7%, signal=76%
REACTOME_EXTRACELLULAR_MATRIX_ORGANIZATION	REACTOME_EXTRACELLULAR_MATRIX_ORGANIZATION	Details ...	105	-0.545286	-2.50029	0	0	0	768	tags=55%, list=16%, signal=64%
KOKKINAKIS_METHIONINE_DEPRIVATION_96HR_UP	KOKKINAKIS_METHIONINE_DEPRIVATION_96HR_UP	Details ...	48	-0.603833	-2.49321	0	0	0	784	tags=52%, list=16%, signal=61%
HALLMARK_INTERFERON_ALPHA_RESPONSE	HALLMARK_INTERFERON_ALPHA_RESPONSE	Details ...	39	-0.660307	-2.49239	0	0	0	1082	tags=69%, list=22%, signal=88%
MCLACHLAN_DENTAL_CARIES_UP	MCLACHLAN_DENTAL_CARIES_UP	Details ...	49	-0.609775	-2.49116	0	0	0	629	tags=53%, list=13%, signal=60%
ISSAEVA_MLL2_TARGETS	ISSAEVA_MLL2_TARGETS	Details ...	26	-0.647344	-2.48715	0	0	0	545	tags=62%, list=11%, signal=69%
RUIZ_TNC_TARGETS_DN	RUIZ_TNC_TARGETS_DN	Details ...	77	-0.56279	-2.48681	0	0	0	795	tags=40%, list=16%, signal=47%
HP_AORTIC_ROOT_ANEURYSM	HP_AORTIC_ROOT_ANEURYSM	Details ...	23	-0.727334	-2.48607	0	0	0	504	tags=57%, list=10%, signal=63%
POOLA_INVASIVE_BREAST_CANCER_UP	POOLA_INVASIVE_BREAST_CANCER_UP	Details ...	79	-0.581661	-2.48568	0	0	0	610	tags=39%, list=12%, signal=44%
MODULE_170	MODULE_170	Details ...	35	-0.686873	-2.48384	0	0	0	943	tags=71%, list=19%, signal=88%
MODULE_84	MODULE_84	Details ...	147	-0.515019	-2.48348	0	0	0	956	tags=54%, list=20%, signal=66%
BROWNE_HCMV_INFECTION_20HR_DN	BROWNE_HCMV_INFECTION_20HR_DN	Details ...	42	-0.666842	-2.48236	0	0	0	912	tags=64%, list=19%, signal=78%
ROZANOV_MMP14_TARGETS_UP	ROZANOV_MMP14_TARGETS_UP	Details ...	92	-0.547282	-2.48209	0	0	0	1033	tags=60%, list=21%, signal=74%
KEGG_FOCAL_ADHESION	KEGG_FOCAL_ADHESION	Details ...	79	-0.549622	-2.48071	0	0	0	818	tags=48%, list=17%, signal=57%
FAN_EMBRYONIC_CTX_BRAIN_ENDOTHELIAL_2	FAN_EMBRYONIC_CTX_BRAIN_ENDOTHELIAL_2	Details ...	130	-0.513167	-2.48025	0	0	0	976	tags=57%, list=20%, signal=69%
MEBARKI_HCC_PROGENITOR_WNT_UP_CTNNB1_DEPENDENT	MEBARKI_HCC_PROGENITOR_WNT_UP_CTNNB1_DEPENDENT	Details ...	29	-0.690098	-2.47961	0	0	0	611	tags=66%, list=13%, signal=74%
GOBP_REGULATION_OF_WOUND_HEALING	GOBP_REGULATION_OF_WOUND_HEALING	Details ...	38	-0.677236	-2.47719	0	0	0	655	tags=61%, list=13%, signal=69%
WILCOX_RESPONSE_TO_PROGESTERONE_DN	WILCOX_RESPONSE_TO_PROGESTERONE_DN	Details ...	25	-0.777076	-2.47506	0	0	0	594	tags=72%, list=12%, signal=82%
BLANCO_MELO_COVID19_SARS_COV_2_INFECTION_CALU3_CELLS_UP	BLANCO_MELO_COVID19_SARS_COV_2_INFECTION_CALU3_CELLS_UP	Details ...	93	-0.555413	-2.47433	0	0	0	1134	tags=65%, list=23%, signal=82%
BERENJENO_TRANSFORMED_BY_RHOA_DN	BERENJENO_TRANSFORMED_BY_RHOA_DN	Details ...	140	-0.514127	-2.47253	0	0	0	956	tags=45%, list=20%, signal=54%
MODULE_297	MODULE_297	Details ...	20	-0.753307	-2.47166	0	0	0	415	tags=65%, list=8%, signal=71%
PEDERSEN_TARGETS_OF_611CTF_ISOFORM_OF_ERBB2	PEDERSEN_TARGETS_OF_611CTF_ISOFORM_OF_ERBB2	Details ...	22	-0.717281	-2.47166	0	0	0	759	tags=73%, list=16%, signal=86%
KEGG_ECM_RECEPTOR_INTERACTION	KEGG_ECM_RECEPTOR_INTERACTION	Details ...	31	-0.68272	-2.47035	0	0	0	738	tags=68%, list=15%, signal=79%
RODRIGUES_THYROID_CARCINOMA_DN	RODRIGUES_THYROID_CARCINOMA_DN	Details ...	31	-0.685408	-2.46977	0	0	0	984	tags=81%, list=20%, signal=100%
CROMER_TUMORIGENESIS_UP	CROMER_TUMORIGENESIS_UP	Details ...	23	-0.755507	-2.4691	0	0	0	964	tags=87%, list=20%, signal=108%
GSE42021_CD24HI_VS_CD24LOW_TREG_THYMUS_DN	GSE42021_CD24HI_VS_CD24LOW_TREG_THYMUS_DN	Details ...	63	-0.551676	-2.46895	0	0	0	1082	tags=60%, list=22%, signal=76%
FAN_OVARY_CL6_PUTATIVE_EARLY_ATRETIC_FOLLICLE_THECAL_CELL_2	FAN_OVARY_CL6_PUTATIVE_EARLY_ATRETIC_FOLLICLE_THECAL_CELL_2	Details ...	137	-0.499911	-2.46893	0	0	0	1131	tags=59%, list=23%, signal=75%
GOBP_NEGATIVE_REGULATION_OF_TRANSMEMBRANE_RECEPTOR_PROTEIN_SERINE_THREONINE_KINASE_SIGNALING_PATHWAY	GOBP_NEGATIVE_REGULATION_OF_TRANSMEMBRANE_RECEPTOR_PROTEIN_SERINE_THREONINE_KINASE_SIGNALING_PATHWAY	Details ...	42	-0.611273	-2.46712	0	0	0	1020	tags=67%, list=21%, signal=84%
SENESE_HDAC1_AND_HDAC2_TARGETS_UP	SENESE_HDAC1_AND_HDAC2_TARGETS_UP	Details ...	73	-0.588484	-2.46705	0	0	0	814	tags=49%, list=17%, signal=58%
GSE42021_TREG_VS_TCONV_PLN_UP	GSE42021_TREG_VS_TCONV_PLN_UP	Details ...	80	-0.576392	-2.46687	0	0	0	1097	tags=63%, list=22%, signal=79%
RIGGI_EWING_SARCOMA_PROGENITOR_DN	RIGGI_EWING_SARCOMA_PROGENITOR_DN	Details ...	66	-0.594215	-2.46499	0	0	0	936	tags=61%, list=19%, signal=74%
MURARO_PANCREAS_DUCTAL_CELL	MURARO_PANCREAS_DUCTAL_CELL	Details ...	470	-0.441798	-2.46497	0	0	0	1242	tags=49%, list=25%, signal=60%
AMIT_EGF_RESPONSE_480_HELA	AMIT_EGF_RESPONSE_480_HELA	Details ...	62	-0.586854	-2.46478	0	0	0	1056	tags=56%, list=22%, signal=71%
MODULE_79	MODULE_79	Details ...	37	-0.645798	-2.46152	0	0	0	781	tags=62%, list=16%, signal=73%
KONDO_EZH2_TARGETS	KONDO_EZH2_TARGETS	Details ...	62	-0.581831	-2.46126	0	0	0	790	tags=52%, list=16%, signal=61%
MODULE_6	MODULE_6	Details ...	130	-0.509087	-2.45906	0	0	0	976	tags=55%, list=20%, signal=66%
GSE37605_FOXP3_FUSION_GFP_VS_IRES_GFP_TREG_C57BL6_DN	GSE37605_FOXP3_FUSION_GFP_VS_IRES_GFP_TREG_C57BL6_DN	Details ...	52	-0.606848	-2.45891	0	0	0	621	tags=48%, list=13%, signal=54%
CUI_DEVELOPING_HEART_VASCULAR_ENDOTHELIAL_CELL	CUI_DEVELOPING_HEART_VASCULAR_ENDOTHELIAL_CELL	Details ...	81	-0.592012	-2.45864	0	0	0	982	tags=65%, list=20%, signal=81%
HP_PNEUMOTHORAX	HP_PNEUMOTHORAX	Details ...	19	-0.72096	-2.45602	0	0	0	648	tags=63%, list=13%, signal=73%
GOBP_TRANSMEMBRANE_RECEPTOR_PROTEIN_SERINE_THREONINE_KINASE_SIGNALING_PATHWAY	GOBP_TRANSMEMBRANE_RECEPTOR_PROTEIN_SERINE_THREONINE_KINASE_SIGNALING_PATHWAY	Details ...	99	-0.522537	-2.45402	0	0	0	1020	tags=56%, list=21%, signal=69%
HP_MITRAL_VALVE_PROLAPSE	HP_MITRAL_VALVE_PROLAPSE	Details ...	29	-0.712059	-2.45279	0	0	0	648	tags=55%, list=13%, signal=63%
HOSHIDA_LIVER_CANCER_SUBCLASS_S1	HOSHIDA_LIVER_CANCER_SUBCLASS_S1	Details ...	93	-0.55208	-2.45019	0	0	0	1231	tags=62%, list=25%, signal=82%
HP_FRAGILE_SKIN	HP_FRAGILE_SKIN	Details ...	16	-0.824059	-2.44987	0	0	0	374	tags=69%, list=8%, signal=74%
SIMBULAN_PARP1_TARGETS_UP	SIMBULAN_PARP1_TARGETS_UP	Details ...	15	-0.789556	-2.44488	0	0	0	450	tags=67%, list=9%, signal=73%
GSE41978_ID2_KO_VS_BIM_KO_KLRG1_LOW_EFFECTOR_CD8_TCELL_UP	GSE41978_ID2_KO_VS_BIM_KO_KLRG1_LOW_EFFECTOR_CD8_TCELL_UP	Details ...	79	-0.564901	-2.44114	0	0	0	823	tags=51%, list=17%, signal=60%
LIM_MAMMARY_STEM_CELL_UP	LIM_MAMMARY_STEM_CELL_UP	Details ...	182	-0.498268	-2.43961	0	0	0	982	tags=54%, list=20%, signal=66%
WP_MIRNA_TARGETS_IN_ECM_AND_MEMBRANE_RECEPTORS	WP_MIRNA_TARGETS_IN_ECM_AND_MEMBRANE_RECEPTORS	Details ...	15	-0.791233	-2.43895	0	0	0	738	tags=87%, list=15%, signal=102%
GRAESSMANN_RESPONSE_TO_MC_AND_SERUM_DEPRIVATION_UP	GRAESSMANN_RESPONSE_TO_MC_AND_SERUM_DEPRIVATION_UP	Details ...	74	-0.572801	-2.43876	0	0	0	1087	tags=65%, list=22%, signal=82%
NAKAMURA_TUMOR_ZONE_PERIPHERAL_VS_CENTRAL_UP	NAKAMURA_TUMOR_ZONE_PERIPHERAL_VS_CENTRAL_UP	Details ...	113	-0.523608	-2.43804	0	0	0	637	tags=35%, list=13%, signal=39%
GSE21546_UNSTIM_VS_ANTI_CD3_STIM_SAP1A_KO_DP_THYMOCYTES_UP	GSE21546_UNSTIM_VS_ANTI_CD3_STIM_SAP1A_KO_DP_THYMOCYTES_UP	Details ...	72	-0.557111	-2.43786	0	0	0	1195	tags=67%, list=24%, signal=87%
HP_HYPEREXTENSIBLE_SKIN	HP_HYPEREXTENSIBLE_SKIN	Details ...	23	-0.745076	-2.43536	0	0	0	847	tags=74%, list=17%, signal=89%
HP_ABNORMAL_MITRAL_VALVE_MORPHOLOGY	HP_ABNORMAL_MITRAL_VALVE_MORPHOLOGY	Details ...	37	-0.680256	-2.43514	0	0	0	648	tags=54%, list=13%, signal=62%
HP_ABNORMAL_CEREBRAL_ARTERY_MORPHOLOGY	HP_ABNORMAL_CEREBRAL_ARTERY_MORPHOLOGY	Details ...	21	-0.765454	-2.43508	0	0	0	648	tags=71%, list=13%, signal=82%
HP_SUBCUTANEOUS_HEMORRHAGE	HP_SUBCUTANEOUS_HEMORRHAGE	Details ...	66	-0.557745	-2.4347	0	0	0	1224	tags=65%, list=25%, signal=86%
GOBP_TRANSFORMING_GROWTH_FACTOR_BETA_RECEPTOR_SIGNALING_PATHWAY	GOBP_TRANSFORMING_GROWTH_FACTOR_BETA_RECEPTOR_SIGNALING_PATHWAY	Details ...	64	-0.591769	-2.43435	0	0	0	1020	tags=61%, list=21%, signal=76%
TURASHVILI_BREAST_DUCTAL_CARCINOMA_VS_DUCTAL_NORMAL_UP	TURASHVILI_BREAST_DUCTAL_CARCINOMA_VS_DUCTAL_NORMAL_UP	Details ...	22	-0.776665	-2.43358	0	0	0	672	tags=68%, list=14%, signal=79%
CHICAS_RB1_TARGETS_GROWING	CHICAS_RB1_TARGETS_GROWING	Details ...	100	-0.515102	-2.43089	0	0	0	607	tags=33%, list=12%, signal=37%
GNF2_CDH11	GNF2_CDH11	Details ...	20	-0.771961	-2.43022	0	0	0	976	tags=90%, list=20%, signal=112%
GOBP_ENDODERMAL_CELL_DIFFERENTIATION	GOBP_ENDODERMAL_CELL_DIFFERENTIATION	Details ...	20	-0.71543	-2.42985	0	0	0	594	tags=70%, list=12%, signal=79%
GSE24634_IL4_VS_CTRL_TREATED_NAIVE_CD4_TCELL_DAY5_DN	GSE24634_IL4_VS_CTRL_TREATED_NAIVE_CD4_TCELL_DAY5_DN	Details ...	66	-0.527285	-2.42936	0	0	0	1082	tags=55%, list=22%, signal=69%
WANG_MLL_TARGETS	WANG_MLL_TARGETS	Details ...	88	-0.510985	-2.42837	0	0	0	810	tags=53%, list=17%, signal=63%
SUNG_METASTASIS_STROMA_UP	SUNG_METASTASIS_STROMA_UP	Details ...	47	-0.596343	-2.42757	0	0	0	900	tags=57%, list=18%, signal=70%
GSE8835_HEALTHY_VS_CLL_CD8_TCELL_DN	GSE8835_HEALTHY_VS_CLL_CD8_TCELL_DN	Details ...	53	-0.572551	-2.42726	0	0	0	1152	tags=62%, list=24%, signal=81%
GSE21546_WT_VS_SAP1A_KO_DP_THYMOCYTES_UP	GSE21546_WT_VS_SAP1A_KO_DP_THYMOCYTES_UP	Details ...	76	-0.561045	-2.42495	0	0	0	1400	tags=70%, list=29%, signal=96%
AIZARANI_LIVER_C32_MVECS_3	AIZARANI_LIVER_C32_MVECS_3	Details ...	44	-0.614502	-2.42451	0	0	0	956	tags=64%, list=20%, signal=78%
GOBP_RESPONSE_TO_WOUNDING	GOBP_RESPONSE_TO_WOUNDING	Details ...	179	-0.487087	-2.42315	0	0	0	833	tags=43%, list=17%, signal=50%
SANA_TNF_SIGNALING_DN	SANA_TNF_SIGNALING_DN	Details ...	26	-0.679025	-2.42261	0	0	0	867	tags=62%, list=18%, signal=74%
GOBP_EXTERNAL_ENCAPSULATING_STRUCTURE_ORGANIZATION	GOBP_EXTERNAL_ENCAPSULATING_STRUCTURE_ORGANIZATION	Details ...	127	-0.520119	-2.41965	0	0	0	847	tags=53%, list=17%, signal=62%
GOMF_EXTRACELLULAR_MATRIX_BINDING	GOMF_EXTRACELLULAR_MATRIX_BINDING	Details ...	20	-0.723525	-2.41953	0	0	0	833	tags=80%, list=17%, signal=96%
CUI_DEVELOPING_HEART_SMOOTH_MUSCLE_CELL	CUI_DEVELOPING_HEART_SMOOTH_MUSCLE_CELL	Details ...	28	-0.700973	-2.41878	0	0	0	435	tags=64%, list=9%, signal=70%
FAN_OVARY_CL9_PUTATIVE_APOPTOTIC_ENDOTHELIAL_CELL	FAN_OVARY_CL9_PUTATIVE_APOPTOTIC_ENDOTHELIAL_CELL	Details ...	135	-0.500766	-2.41691	0	0	0	1279	tags=59%, list=26%, signal=77%
MODULE_3	MODULE_3	Details ...	161	-0.478133	-2.4155	0	0	0	1183	tags=44%, list=24%, signal=56%
GSE3982_BASOPHIL_VS_TH1_UP	GSE3982_BASOPHIL_VS_TH1_UP	Details ...	49	-0.57477	-2.41533	0	0	0	1603	tags=78%, list=33%, signal=114%
BOQUEST_STEM_CELL_CULTURED_VS_FRESH_UP	BOQUEST_STEM_CELL_CULTURED_VS_FRESH_UP	Details ...	151	-0.504614	-2.4128	0	0	0	882	tags=53%, list=18%, signal=63%
GOBP_POSITIVE_REGULATION_OF_LOCOMOTION	GOBP_POSITIVE_REGULATION_OF_LOCOMOTION	Details ...	144	-0.504028	-2.41153	0	0	0	1233	tags=60%, list=25%, signal=78%
BURTON_ADIPOGENESIS_8	BURTON_ADIPOGENESIS_8	Details ...	35	-0.677825	-2.41117	0	0	0	910	tags=69%, list=19%, signal=84%
GSE37533_PPARG1_FOXP3_VS_PPARG2_FOXP3_TRANSDUCED_CD4_TCELL_PIOGLITAZONE_TREATED_DN	GSE37533_PPARG1_FOXP3_VS_PPARG2_FOXP3_TRANSDUCED_CD4_TCELL_PIOGLITAZONE_TREATED_DN	Details ...	74	-0.544552	-2.41089	0	0	0	1397	tags=66%, list=29%, signal=91%
HALLMARK_INFLAMMATORY_RESPONSE	HALLMARK_INFLAMMATORY_RESPONSE	Details ...	59	-0.591824	-2.40985	0	0	0	707	tags=49%, list=14%, signal=57%
GUENTHER_GROWTH_SPHERICAL_VS_ADHERENT_DN	GUENTHER_GROWTH_SPHERICAL_VS_ADHERENT_DN	Details ...	20	-0.764472	-2.40874	0	0	0	890	tags=85%, list=18%, signal=104%
SERVITJA_ISLET_HNF1A_TARGETS_UP	SERVITJA_ISLET_HNF1A_TARGETS_UP	Details ...	62	-0.557743	-2.40871	0	0	0	881	tags=63%, list=18%, signal=76%
TAKEDA_TARGETS_OF_NUP98_HOXA9_FUSION_3D_UP	TAKEDA_TARGETS_OF_NUP98_HOXA9_FUSION_3D_UP	Details ...	61	-0.584185	-2.40845	0	0	0	671	tags=52%, list=14%, signal=60%
HUANG_FOXA2_TARGETS_DN	HUANG_FOXA2_TARGETS_DN	Details ...	17	-0.747731	-2.40793	0	0	0	753	tags=76%, list=15%, signal=90%
GOBP_POSITIVE_REGULATION_OF_CHEMOTAXIS	GOBP_POSITIVE_REGULATION_OF_CHEMOTAXIS	Details ...	36	-0.64095	-2.40744	0	0	0	599	tags=53%, list=12%, signal=60%
MODULE_2	MODULE_2	Details ...	147	-0.488185	-2.40707	0	0	0	873	tags=53%, list=18%, signal=63%
HALMOS_CEBPA_TARGETS_UP	HALMOS_CEBPA_TARGETS_UP	Details ...	19	-0.716636	-2.40648	0	0	0	1098	tags=84%, list=22%, signal=108%
LINDVALL_IMMORTALIZED_BY_TERT_DN	LINDVALL_IMMORTALIZED_BY_TERT_DN	Details ...	24	-0.7097	-2.40554	0	0	0	500	tags=58%, list=10%, signal=65%
MURARO_PANCREAS_ENDOTHELIAL_CELL	MURARO_PANCREAS_ENDOTHELIAL_CELL	Details ...	143	-0.501484	-2.40472	0	0	0	1238	tags=60%, list=25%, signal=78%
SENESE_HDAC3_TARGETS_UP	SENESE_HDAC3_TARGETS_UP	Details ...	166	-0.488481	-2.40393	0	0	0	948	tags=43%, list=19%, signal=51%
TSUNODA_CISPLATIN_RESISTANCE_DN	TSUNODA_CISPLATIN_RESISTANCE_DN	Details ...	18	-0.7438	-2.40337	0	0	0	863	tags=78%, list=18%, signal=94%
GSE1432_1H_VS_24H_IFNG_MICROGLIA_DN	GSE1432_1H_VS_24H_IFNG_MICROGLIA_DN	Details ...	54	-0.601794	-2.40111	0	0	0	1131	tags=59%, list=23%, signal=76%
FUJII_YBX1_TARGETS_UP	FUJII_YBX1_TARGETS_UP	Details ...	18	-0.687889	-2.39993	0	0	0	407	tags=61%, list=8%, signal=66%
GOBP_RESPONSE_TO_CYTOKINE	GOBP_RESPONSE_TO_CYTOKINE	Details ...	316	-0.452851	-2.39829	0	0	0	1159	tags=47%, list=24%, signal=58%
IGLESIAS_E2F_TARGETS_UP	IGLESIAS_E2F_TARGETS_UP	Details ...	66	-0.575672	-2.39763	0	0	0	1173	tags=61%, list=24%, signal=79%
HAN_SATB1_TARGETS_DN	HAN_SATB1_TARGETS_DN	Details ...	113	-0.520671	-2.39746	0	0	0	880	tags=47%, list=18%, signal=56%
GOCC_ANCHORING_JUNCTION	GOCC_ANCHORING_JUNCTION	Details ...	289	-0.455643	-2.39723	0	0	0	1212	tags=49%, list=25%, signal=62%
TRAVAGLINI_LUNG_BASAL_CELL	TRAVAGLINI_LUNG_BASAL_CELL	Details ...	78	-0.545107	-2.39642	0	0	0	863	tags=49%, list=18%, signal=58%
HENDRICKS_SMARCA4_TARGETS_UP	HENDRICKS_SMARCA4_TARGETS_UP	Details ...	28	-0.67108	-2.39596	0	0	0	863	tags=68%, list=18%, signal=82%
KIM_WT1_TARGETS_UP	KIM_WT1_TARGETS_UP	Details ...	86	-0.551775	-2.39389	0	0	0	807	tags=53%, list=17%, signal=63%
CUI_DEVELOPING_HEART_COMPACT_VENTRICULAR_CARDIOMYOCYTE	CUI_DEVELOPING_HEART_COMPACT_VENTRICULAR_CARDIOMYOCYTE	Details ...	31	-0.662303	-2.39218	0	0	0	881	tags=74%, list=18%, signal=90%
MODULE_24	MODULE_24	Details ...	125	-0.496959	-2.39119	0	0	0	926	tags=50%, list=19%, signal=61%
WONG_ADULT_TISSUE_STEM_MODULE	WONG_ADULT_TISSUE_STEM_MODULE	Details ...	239	-0.472749	-2.38962	0	0	0	1030	tags=51%, list=21%, signal=62%
PID_INTEGRIN3_PATHWAY	PID_INTEGRIN3_PATHWAY	Details ...	21	-0.738348	-2.38925	0	0	0	597	tags=67%, list=12%, signal=76%
GSE1432_CTRL_VS_IFNG_6H_MICROGLIA_DN	GSE1432_CTRL_VS_IFNG_6H_MICROGLIA_DN	Details ...	59	-0.558731	-2.38918	0	0	0	823	tags=44%, list=17%, signal=52%
GOBP_REGULATION_OF_CELLULAR_RESPONSE_TO_TRANSFORMING_GROWTH_FACTOR_BETA_STIMULUS	GOBP_REGULATION_OF_CELLULAR_RESPONSE_TO_TRANSFORMING_GROWTH_FACTOR_BETA_STIMULUS	Details ...	43	-0.623312	-2.38857	0	0	0	1020	tags=65%, list=21%, signal=82%
BROWNE_HCMV_INFECTION_14HR_DN	BROWNE_HCMV_INFECTION_14HR_DN	Details ...	98	-0.520381	-2.38738	0	0	0	784	tags=41%, list=16%, signal=48%
MODULE_92	MODULE_92	Details ...	38	-0.647592	-2.38643	0	0	0	787	tags=61%, list=16%, signal=72%
TRAVAGLINI_LUNG_LYMPHATIC_CELL	TRAVAGLINI_LUNG_LYMPHATIC_CELL	Details ...	83	-0.543959	-2.38343	0	0	0	890	tags=54%, list=18%, signal=65%
AIZARANI_LIVER_C24_EPCAM_POS_BILE_DUCT_CELLS_3	AIZARANI_LIVER_C24_EPCAM_POS_BILE_DUCT_CELLS_3	Details ...	74	-0.555923	-2.38189	0	0	0	1138	tags=59%, list=23%, signal=76%
GSE20715_0H_VS_24H_OZONE_TLR4_KO_LUNG_DN	GSE20715_0H_VS_24H_OZONE_TLR4_KO_LUNG_DN	Details ...	62	-0.564153	-2.37943	0	0	0	629	tags=44%, list=13%, signal=49%
RUIZ_TNC_TARGETS_UP	RUIZ_TNC_TARGETS_UP	Details ...	58	-0.596587	-2.37805	0	0	0	884	tags=53%, list=18%, signal=64%
CROONQUIST_STROMAL_STIMULATION_UP	CROONQUIST_STROMAL_STIMULATION_UP	Details ...	30	-0.666856	-2.37692	0	0	0	594	tags=63%, list=12%, signal=72%
KYNG_DNA_DAMAGE_DN	KYNG_DNA_DAMAGE_DN	Details ...	56	-0.565292	-2.37464	0	0	0	1213	tags=59%, list=25%, signal=77%
GOMF_STRUCTURAL_MOLECULE_ACTIVITY	GOMF_STRUCTURAL_MOLECULE_ACTIVITY	Details ...	191	-0.462438	-2.37449	0	0	0	409	tags=26%, list=8%, signal=27%
GOCC_EXTERNAL_ENCAPSULATING_STRUCTURE	GOCC_EXTERNAL_ENCAPSULATING_STRUCTURE	Details ...	158	-0.50324	-2.37406	0	0	0	597	tags=47%, list=12%, signal=52%
YAMASHITA_METHYLATED_IN_PROSTATE_CANCER	YAMASHITA_METHYLATED_IN_PROSTATE_CANCER	Details ...	15	-0.811747	-2.37314	0	0	0	520	tags=80%, list=11%, signal=89%
LINDVALL_IMMORTALIZED_BY_TERT_UP	LINDVALL_IMMORTALIZED_BY_TERT_UP	Details ...	29	-0.684491	-2.37289	0	0	0	734	tags=62%, list=15%, signal=73%
KRIEG_HYPOXIA_VIA_KDM3A	KRIEG_HYPOXIA_VIA_KDM3A	Details ...	15	-0.742217	-2.37284	0	0	0	369	tags=53%, list=8%, signal=58%
REACTOME_SMOOTH_MUSCLE_CONTRACTION	REACTOME_SMOOTH_MUSCLE_CONTRACTION	Details ...	20	-0.716976	-2.37278	0	0	0	1199	tags=90%, list=25%, signal=119%
AIZARANI_LIVER_C33_STELLATE_CELLS_2	AIZARANI_LIVER_C33_STELLATE_CELLS_2	Details ...	62	-0.593274	-2.37014	0	0	0	1167	tags=71%, list=24%, signal=92%
REACTOME_DEGRADATION_OF_THE_EXTRACELLULAR_MATRIX	REACTOME_DEGRADATION_OF_THE_EXTRACELLULAR_MATRIX	Details ...	51	-0.568958	-2.36757	0	0	0	702	tags=53%, list=14%, signal=61%
MODULE_44	MODULE_44	Details ...	100	-0.511965	-2.36529	0	0	0	1183	tags=63%, list=24%, signal=81%
NABA_CORE_MATRISOME	NABA_CORE_MATRISOME	Details ...	85	-0.530711	-2.36404	0	0	0	476	tags=49%, list=10%, signal=54%
FAN_EMBRYONIC_CTX_BRAIN_ENDOTHELIAL_1	FAN_EMBRYONIC_CTX_BRAIN_ENDOTHELIAL_1	Details ...	151	-0.469027	-2.3636	0	0	0	1200	tags=56%, list=25%, signal=72%
GOBP_CIRCULATORY_SYSTEM_DEVELOPMENT	GOBP_CIRCULATORY_SYSTEM_DEVELOPMENT	Details ...	292	-0.451827	-2.3626	0	0	0	847	tags=41%, list=17%, signal=46%
BLANCO_MELO_BRONCHIAL_EPITHELIAL_CELLS_INFLUENZA_A_DEL_NS1_INFECTION_UP	BLANCO_MELO_BRONCHIAL_EPITHELIAL_CELLS_INFLUENZA_A_DEL_NS1_INFECTION_UP	Details ...	197	-0.475348	-2.36202	0	0	0	961	tags=48%, list=20%, signal=57%
GU_PDEF_TARGETS_UP	GU_PDEF_TARGETS_UP	Details ...	30	-0.664345	-2.36182	0	0	0	689	tags=57%, list=14%, signal=66%
GOBP_MOVEMENT_IN_HOST_ENVIRONMENT	GOBP_MOVEMENT_IN_HOST_ENVIRONMENT	Details ...	50	-0.561853	-2.35667	0	4.46481e-05	0.01	961	tags=50%, list=20%, signal=62%
MODULE_154	MODULE_154	Details ...	18	-0.722229	-2.35468	0	4.4484e-05	0.01	415	tags=61%, list=8%, signal=67%
SMIRNOV_CIRCULATING_ENDOTHELIOCYTES_IN_CANCER_UP	SMIRNOV_CIRCULATING_ENDOTHELIOCYTES_IN_CANCER_UP	Details ...	54	-0.579433	-2.35408	0	4.4321e-05	0.01	845	tags=59%, list=17%, signal=71%
TAKEDA_TARGETS_OF_NUP98_HOXA9_FUSION_10D_UP	TAKEDA_TARGETS_OF_NUP98_HOXA9_FUSION_10D_UP	Details ...	58	-0.547804	-2.35342	0	4.41593e-05	0.01	657	tags=47%, list=13%, signal=53%
GOBP_CYTOKINE_MEDIATED_SIGNALING_PATHWAY	GOBP_CYTOKINE_MEDIATED_SIGNALING_PATHWAY	Details ...	212	-0.466054	-2.35213	0	4.39987e-05	0.01	1224	tags=53%, list=25%, signal=67%
PRAMOONJAGO_SOX4_TARGETS_UP	PRAMOONJAGO_SOX4_TARGETS_UP	Details ...	19	-0.688469	-2.35183	0	4.38393e-05	0.01	1180	tags=84%, list=24%, signal=111%
BILD_HRAS_ONCOGENIC_SIGNATURE	BILD_HRAS_ONCOGENIC_SIGNATURE	Details ...	93	-0.517688	-2.35135	0	4.3681e-05	0.01	830	tags=44%, list=17%, signal=52%
GSE13484_UNSTIM_VS_YF17D_VACCINE_STIM_PBMC_DN	GSE13484_UNSTIM_VS_YF17D_VACCINE_STIM_PBMC_DN	Details ...	66	-0.547416	-2.35114	0	4.35239e-05	0.01	1082	tags=59%, list=22%, signal=75%
CHIARADONNA_NEOPLASTIC_TRANSFORMATION_KRAS_DN	CHIARADONNA_NEOPLASTIC_TRANSFORMATION_KRAS_DN	Details ...	53	-0.570949	-2.35109	0	4.33679e-05	0.01	965	tags=66%, list=20%, signal=81%
TSENG_IRS1_TARGETS_DN	TSENG_IRS1_TARGETS_DN	Details ...	47	-0.576277	-2.35064	0	4.3213e-05	0.01	863	tags=51%, list=18%, signal=61%
WAMUNYOKOLI_OVARIAN_CANCER_LMP_DN	WAMUNYOKOLI_OVARIAN_CANCER_LMP_DN	Details ...	83	-0.542894	-2.35022	0	4.30592e-05	0.01	1195	tags=58%, list=24%, signal=75%
GSE19941_LPS_VS_LPS_AND_IL10_STIM_IL10_KO_NFKBP50_KO_MACROPHAGE_DN	GSE19941_LPS_VS_LPS_AND_IL10_STIM_IL10_KO_NFKBP50_KO_MACROPHAGE_DN	Details ...	56	-0.584281	-2.35011	0	4.29065e-05	0.01	1292	tags=66%, list=26%, signal=89%
MANALO_HYPOXIA_UP	MANALO_HYPOXIA_UP	Details ...	85	-0.532007	-2.34992	0	4.27549e-05	0.01	867	tags=53%, list=18%, signal=63%
ELVIDGE_HYPOXIA_BY_DMOG_UP	ELVIDGE_HYPOXIA_BY_DMOG_UP	Details ...	52	-0.583566	-2.3491	0	4.26044e-05	0.01	1122	tags=67%, list=23%, signal=86%
SANA_RESPONSE_TO_IFNG_UP	SANA_RESPONSE_TO_IFNG_UP	Details ...	27	-0.657568	-2.34634	0	4.24549e-05	0.01	723	tags=59%, list=15%, signal=69%
DESCARTES_FETAL_EYE_CORNEAL_AND_CONJUNCTIVAL_EPITHELIAL_CELLS	DESCARTES_FETAL_EYE_CORNEAL_AND_CONJUNCTIVAL_EPITHELIAL_CELLS	Details ...	62	-0.573087	-2.3461	0	4.23064e-05	0.01	692	tags=48%, list=14%, signal=56%
HALLMARK_INTERFERON_GAMMA_RESPONSE	HALLMARK_INTERFERON_GAMMA_RESPONSE	Details ...	67	-0.561165	-2.34591	0	4.2159e-05	0.01	1439	tags=75%, list=29%, signal=104%
GSE24634_IL4_VS_CTRL_TREATED_NAIVE_CD4_TCELL_DAY10_DN	GSE24634_IL4_VS_CTRL_TREATED_NAIVE_CD4_TCELL_DAY10_DN	Details ...	64	-0.563925	-2.34451	0	4.20126e-05	0.01	1470	tags=75%, list=30%, signal=106%
URS_ADIPOCYTE_DIFFERENTIATION_DN	URS_ADIPOCYTE_DIFFERENTIATION_DN	Details ...	16	-0.770867	-2.34243	0	4.18673e-05	0.01	753	tags=69%, list=15%, signal=81%
GSE4748_CTRL_VS_LPS_STIM_DC_3H_UP	GSE4748_CTRL_VS_LPS_STIM_DC_3H_UP	Details ...	75	-0.563694	-2.34177	0	4.17229e-05	0.01	780	tags=47%, list=16%, signal=55%
GSE2405_HEAT_KILLED_LYSATE_VS_LIVE_A_PHAGOCYTOPHILUM_STIM_NEUTROPHIL_24H_UP	GSE2405_HEAT_KILLED_LYSATE_VS_LIVE_A_PHAGOCYTOPHILUM_STIM_NEUTROPHIL_24H_UP	Details ...	66	-0.528806	-2.34138	0	4.15795e-05	0.01	1024	tags=55%, list=21%, signal=68%
HOLLERN_EMT_BREAST_TUMOR_UP	HOLLERN_EMT_BREAST_TUMOR_UP	Details ...	55	-0.591139	-2.34125	0	4.14371e-05	0.01	948	tags=56%, list=19%, signal=69%
HP_ABNORMALITY_OF_THE_CEREBRAL_VASCULATURE	HP_ABNORMALITY_OF_THE_CEREBRAL_VASCULATURE	Details ...	79	-0.533969	-2.34122	0	4.12957e-05	0.01	1185	tags=54%, list=24%, signal=71%
TRAVAGLINI_LUNG_CAPILLARY_INTERMEDIATE_1_CELL	TRAVAGLINI_LUNG_CAPILLARY_INTERMEDIATE_1_CELL	Details ...	55	-0.571306	-2.34067	0	4.11552e-05	0.01	1027	tags=64%, list=21%, signal=80%
DESCARTES_FETAL_SPLEEN_MESOTHELIAL_CELLS	DESCARTES_FETAL_SPLEEN_MESOTHELIAL_CELLS	Details ...	58	-0.571022	-2.34025	0	4.10157e-05	0.01	872	tags=59%, list=18%, signal=71%
GOBP_VASOCONSTRICTION	GOBP_VASOCONSTRICTION	Details ...	20	-0.672408	-2.33784	0	4.08772e-05	0.01	430	tags=55%, list=9%, signal=60%
GOBP_COLLAGEN_FIBRIL_ORGANIZATION	GOBP_COLLAGEN_FIBRIL_ORGANIZATION	Details ...	21	-0.691663	-2.33782	0	4.07395e-05	0.01	1056	tags=90%, list=22%, signal=115%
HP_ABNORMAL_ARTERIAL_PHYSIOLOGY	HP_ABNORMAL_ARTERIAL_PHYSIOLOGY	Details ...	45	-0.59356	-2.33727	0	4.06028e-05	0.01	847	tags=53%, list=17%, signal=64%
GOBP_RESPONSE_TO_INTERFERON_GAMMA	GOBP_RESPONSE_TO_INTERFERON_GAMMA	Details ...	64	-0.571517	-2.33652	0	4.0467e-05	0.01	1097	tags=59%, list=22%, signal=76%
GOBP_REGULATION_OF_BODY_FLUID_LEVELS	GOBP_REGULATION_OF_BODY_FLUID_LEVELS	Details ...	125	-0.487479	-2.33545	0	4.03321e-05	0.01	621	tags=35%, list=13%, signal=39%
HP_SPARSE_EYELASHES	HP_SPARSE_EYELASHES	Details ...	16	-0.744173	-2.33326	0	4.01981e-05	0.01	415	tags=50%, list=8%, signal=54%
GSE36826_WT_VS_IL1R_KO_SKIN_STAPH_AUREUS_INF_DN	GSE36826_WT_VS_IL1R_KO_SKIN_STAPH_AUREUS_INF_DN	Details ...	63	-0.518427	-2.33171	0	4.0065e-05	0.01	1010	tags=57%, list=21%, signal=71%
RUBENSTEIN_SKELETAL_MUSCLE_PERICYTES	RUBENSTEIN_SKELETAL_MUSCLE_PERICYTES	Details ...	56	-0.55262	-2.33144	0	3.99328e-05	0.01	867	tags=48%, list=18%, signal=58%
SENESE_HDAC1_TARGETS_UP	SENESE_HDAC1_TARGETS_UP	Details ...	143	-0.482956	-2.32846	0	3.98014e-05	0.01	1360	tags=55%, list=28%, signal=73%
CORRE_MULTIPLE_MYELOMA_UP	CORRE_MULTIPLE_MYELOMA_UP	Details ...	23	-0.691786	-2.32828	0	3.96709e-05	0.01	357	tags=57%, list=7%, signal=61%
REACTOME_O_LINKED_GLYCOSYLATION	REACTOME_O_LINKED_GLYCOSYLATION	Details ...	21	-0.652533	-2.32811	0	3.95413e-05	0.01	684	tags=57%, list=14%, signal=66%
FRANCO_BLOOD_SANOFI_PASTEUR_SA_INACTIVATED_INFLUENZA_VACCINE_CORRELATED_WITH_ANTIBODY_RESPONSE_AGE_18_40YO_1DY_POSITIVE	FRANCO_BLOOD_SANOFI_PASTEUR_SA_INACTIVATED_INFLUENZA_VACCINE_CORRELATED_WITH_ANTIBODY_RESPONSE_AGE_18_40YO_1DY_POSITIVE	Details ...	43	-0.576026	-2.3261	0	3.94125e-05	0.01	1097	tags=58%, list=22%, signal=74%
GOMF_RECEPTOR_REGULATOR_ACTIVITY	GOMF_RECEPTOR_REGULATOR_ACTIVITY	Details ...	106	-0.504785	-2.32553	0	3.92845e-05	0.01	668	tags=43%, list=14%, signal=49%
GOCC_ENDOPLASMIC_RETICULUM_LUMEN	GOCC_ENDOPLASMIC_RETICULUM_LUMEN	Details ...	88	-0.510629	-2.32483	0	3.91574e-05	0.01	868	tags=56%, list=18%, signal=66%
HP_AORTIC_ANEURYSM	HP_AORTIC_ANEURYSM	Details ...	43	-0.571118	-2.32468	0	3.90311e-05	0.01	847	tags=49%, list=17%, signal=59%
DESCARTES_FETAL_MUSCLE_SMOOTH_MUSCLE_CELLS	DESCARTES_FETAL_MUSCLE_SMOOTH_MUSCLE_CELLS	Details ...	22	-0.702327	-2.32428	0	3.89056e-05	0.01	438	tags=59%, list=9%, signal=65%
PHONG_TNF_RESPONSE_VIA_P38_PARTIAL	PHONG_TNF_RESPONSE_VIA_P38_PARTIAL	Details ...	68	-0.546506	-2.32316	0	3.87809e-05	0.01	870	tags=50%, list=18%, signal=60%
COLINA_TARGETS_OF_4EBP1_AND_4EBP2	COLINA_TARGETS_OF_4EBP1_AND_4EBP2	Details ...	137	-0.473028	-2.32058	0	3.8657e-05	0.01	1064	tags=44%, list=22%, signal=54%
STK33_UP	STK33_UP	Details ...	80	-0.545641	-2.32011	0	3.85339e-05	0.01	996	tags=54%, list=20%, signal=66%
DELACROIX_RARG_BOUND_MEF	DELACROIX_RARG_BOUND_MEF	Details ...	120	-0.502908	-2.31982	0	3.84115e-05	0.01	1029	tags=48%, list=21%, signal=59%
NABA_MATRISOME_ASSOCIATED	NABA_MATRISOME_ASSOCIATED	Details ...	132	-0.515893	-2.31959	0	3.829e-05	0.01	890	tags=55%, list=18%, signal=65%
WP_HUMAN_COMPLEMENT_SYSTEM	WP_HUMAN_COMPLEMENT_SYSTEM	Details ...	18	-0.73877	-2.31823	0	3.81692e-05	0.01	582	tags=67%, list=12%, signal=75%
TONKS_TARGETS_OF_RUNX1_RUNX1T1_FUSION_HSC_UP	TONKS_TARGETS_OF_RUNX1_RUNX1T1_FUSION_HSC_UP	Details ...	72	-0.532877	-2.31806	0	3.80492e-05	0.01	1082	tags=58%, list=22%, signal=74%
GRAHAM_NORMAL_QUIESCENT_VS_NORMAL_DIVIDING_UP	GRAHAM_NORMAL_QUIESCENT_VS_NORMAL_DIVIDING_UP	Details ...	18	-0.720944	-2.31768	0	3.79299e-05	0.01	948	tags=83%, list=19%, signal=103%
KIM_WT1_TARGETS_12HR_UP	KIM_WT1_TARGETS_12HR_UP	Details ...	66	-0.556494	-2.31754	0	3.78114e-05	0.01	1095	tags=58%, list=22%, signal=73%
GSE29618_BCELL_VS_MONOCYTE_DN	GSE29618_BCELL_VS_MONOCYTE_DN	Details ...	81	-0.513904	-2.3169	0	3.75765e-05	0.01	1471	tags=68%, list=30%, signal=96%
GRUETZMANN_PANCREATIC_CANCER_UP	GRUETZMANN_PANCREATIC_CANCER_UP	Details ...	139	-0.490116	-2.31619	0	3.74602e-05	0.01	994	tags=46%, list=20%, signal=56%
HORIUCHI_WTAP_TARGETS_UP	HORIUCHI_WTAP_TARGETS_UP	Details ...	91	-0.504954	-2.31568	0	3.73446e-05	0.01	926	tags=51%, list=19%, signal=61%
TRAVAGLINI_LUNG_CAPILLARY_AEROCYTE_CELL	TRAVAGLINI_LUNG_CAPILLARY_AEROCYTE_CELL	Details ...	15	-0.700699	-2.31539	0	3.72297e-05	0.01	833	tags=67%, list=17%, signal=80%
WESTON_VEGFA_TARGETS	WESTON_VEGFA_TARGETS	Details ...	34	-0.654463	-2.3127	0	3.71155e-05	0.01	619	tags=56%, list=13%, signal=64%
REACTOME_ELASTIC_FIBRE_FORMATION	REACTOME_ELASTIC_FIBRE_FORMATION	Details ...	21	-0.708197	-2.31265	0	3.70019e-05	0.01	812	tags=86%, list=17%, signal=102%
GSE3039_NKT_CELL_VS_B2_BCELL_DN	GSE3039_NKT_CELL_VS_B2_BCELL_DN	Details ...	68	-0.568425	-2.31176	0	3.68891e-05	0.01	926	tags=56%, list=19%, signal=68%
GOBP_COAGULATION	GOBP_COAGULATION	Details ...	85	-0.531713	-2.31131	0	3.6777e-05	0.01	550	tags=38%, list=11%, signal=42%
GOBP_VASCULATURE_DEVELOPMENT	GOBP_VASCULATURE_DEVELOPMENT	Details ...	204	-0.465703	-2.30988	0	3.66656e-05	0.01	1185	tags=55%, list=24%, signal=69%
GSE13485_CTRL_VS_DAY7_YF17D_VACCINE_PBMC_DN	GSE13485_CTRL_VS_DAY7_YF17D_VACCINE_PBMC_DN	Details ...	62	-0.554625	-2.3086	0	3.65548e-05	0.01	650	tags=42%, list=13%, signal=48%
HP_ABNORMAL_HEART_VALVE_PHYSIOLOGY	HP_ABNORMAL_HEART_VALVE_PHYSIOLOGY	Details ...	88	-0.488033	-2.30814	0	3.64447e-05	0.01	659	tags=35%, list=13%, signal=40%
GOZGIT_ESR1_TARGETS_DN	GOZGIT_ESR1_TARGETS_DN	Details ...	228	-0.44543	-2.30765	0	3.63353e-05	0.01	965	tags=48%, list=20%, signal=57%
HP_DERMAL_ATROPHY	HP_DERMAL_ATROPHY	Details ...	31	-0.640544	-2.3064	0	3.62265e-05	0.01	461	tags=42%, list=9%, signal=46%
WP_FOCAL_ADHESION	WP_FOCAL_ADHESION	Details ...	74	-0.540577	-2.30561	0	3.61183e-05	0.01	854	tags=47%, list=17%, signal=56%
HP_ATROPHIC_SCARS	HP_ATROPHIC_SCARS	Details ...	15	-0.802897	-2.30521	0	3.60108e-05	0.01	374	tags=67%, list=8%, signal=72%
HP_SUBCUTANEOUS_NODULE	HP_SUBCUTANEOUS_NODULE	Details ...	29	-0.626269	-2.305	0	3.5904e-05	0.01	814	tags=59%, list=17%, signal=70%
HP_ABNORMAL_HEART_VALVE_MORPHOLOGY	HP_ABNORMAL_HEART_VALVE_MORPHOLOGY	Details ...	82	-0.535295	-2.30426	0	3.57977e-05	0.01	652	tags=38%, list=13%, signal=43%
MODULE_55	MODULE_55	Details ...	217	-0.453452	-2.30173	0	3.56922e-05	0.01	926	tags=46%, list=19%, signal=54%
SCHERER_PBMC_APSV_WETVAX_AGE_18_32YO_5_TO_7DY_UP	SCHERER_PBMC_APSV_WETVAX_AGE_18_32YO_5_TO_7DY_UP	Details ...	90	-0.516621	-2.30148	0	3.55872e-05	0.01	1471	tags=71%, list=30%, signal=100%
TURASHVILI_BREAST_DUCTAL_CARCINOMA_VS_LOBULAR_NORMAL_UP	TURASHVILI_BREAST_DUCTAL_CARCINOMA_VS_LOBULAR_NORMAL_UP	Details ...	27	-0.660445	-2.30123	0	3.54828e-05	0.01	672	tags=48%, list=14%, signal=56%
GSE42724_NAIVE_BCELL_VS_PLASMABLAST_UP	GSE42724_NAIVE_BCELL_VS_PLASMABLAST_UP	Details ...	64	-0.544502	-2.29993	0	3.53791e-05	0.01	961	tags=55%, list=20%, signal=67%
GOBP_ANATOMICAL_STRUCTURE_FORMATION_INVOLVED_IN_MORPHOGENESIS	GOBP_ANATOMICAL_STRUCTURE_FORMATION_INVOLVED_IN_MORPHOGENESIS	Details ...	286	-0.447062	-2.29984	0	3.52759e-05	0.01	1176	tags=52%, list=24%, signal=65%
RUBENSTEIN_SKELETAL_MUSCLE_ENDOTHELIAL_CELLS	RUBENSTEIN_SKELETAL_MUSCLE_ENDOTHELIAL_CELLS	Details ...	46	-0.573089	-2.29977	0	3.51734e-05	0.01	1279	tags=72%, list=26%, signal=96%
MODULE_321	MODULE_321	Details ...	62	-0.578039	-2.29926	0	3.50714e-05	0.01	1056	tags=66%, list=22%, signal=83%
HP_HYPERKERATOSIS	HP_HYPERKERATOSIS	Details ...	57	-0.533548	-2.29775	0	3.49701e-05	0.01	925	tags=47%, list=19%, signal=58%
GAUCHER_PBMC_YF_VAX_STAMARIL_UNKNOWN_AGE_3DY_UP	GAUCHER_PBMC_YF_VAX_STAMARIL_UNKNOWN_AGE_3DY_UP	Details ...	72	-0.533293	-2.29714	0	3.48693e-05	0.01	1082	tags=54%, list=22%, signal=69%
GSE42021_TCONV_PLN_VS_CD24HI_TCONV_THYMUS_UP	GSE42021_TCONV_PLN_VS_CD24HI_TCONV_THYMUS_UP	Details ...	59	-0.537489	-2.2959	0	3.47691e-05	0.01	823	tags=42%, list=17%, signal=50%
KRIGE_RESPONSE_TO_TOSEDOSTAT_24HR_UP	KRIGE_RESPONSE_TO_TOSEDOSTAT_24HR_UP	Details ...	217	-0.449626	-2.29545	0	3.46694e-05	0.01	1702	tags=70%, list=35%, signal=103%
HOOI_ST7_TARGETS_UP	HOOI_ST7_TARGETS_UP	Details ...	26	-0.668193	-2.29422	0	3.45704e-05	0.01	412	tags=54%, list=8%, signal=58%
YAO_TEMPORAL_RESPONSE_TO_PROGESTERONE_CLUSTER_16	YAO_TEMPORAL_RESPONSE_TO_PROGESTERONE_CLUSTER_16	Details ...	34	-0.636062	-2.29151	0	6.88629e-05	0.02	920	tags=59%, list=19%, signal=72%
GSE13485_CTRL_VS_DAY3_YF17D_VACCINE_PBMC_DN	GSE13485_CTRL_VS_DAY3_YF17D_VACCINE_PBMC_DN	Details ...	49	-0.567589	-2.2884	0	6.86673e-05	0.02	1358	tags=67%, list=28%, signal=92%
DESCARTES_FETAL_ADRENAL_CSH1_CSH2_POSITIVE_CELLS	DESCARTES_FETAL_ADRENAL_CSH1_CSH2_POSITIVE_CELLS	Details ...	39	-0.5991	-2.28817	0	6.84728e-05	0.02	647	tags=49%, list=13%, signal=56%
ZAK_PBMC_MRKAD5_HIV_1_GAG_POL_NEF_AGE_20_50YO_1DY_UP	ZAK_PBMC_MRKAD5_HIV_1_GAG_POL_NEF_AGE_20_50YO_1DY_UP	Details ...	301	-0.43617	-2.28785	0	6.82793e-05	0.02	1365	tags=54%, list=28%, signal=70%
HP_DILATATION_OF_THE_CEREBRAL_ARTERY	HP_DILATATION_OF_THE_CEREBRAL_ARTERY	Details ...	17	-0.784543	-2.28713	0	6.8087e-05	0.02	648	tags=76%, list=13%, signal=88%
STK33_NOMO_UP	STK33_NOMO_UP	Details ...	93	-0.527072	-2.28583	0	0.000102004	0.03	1222	tags=62%, list=25%, signal=82%
PATEL_SKIN_OF_BODY_ZOSTAVAX_AGE_70_93YO_VZV_CHALLENGE_6HR_UP	PATEL_SKIN_OF_BODY_ZOSTAVAX_AGE_70_93YO_VZV_CHALLENGE_6HR_UP	Details ...	78	-0.515601	-2.28573	0	0.000101718	0.03	830	tags=41%, list=17%, signal=49%
MODULE_357	MODULE_357	Details ...	20	-0.753307	-2.28515	0	0.000101434	0.03	415	tags=65%, list=8%, signal=71%
HP_BLUE_SCLERAE	HP_BLUE_SCLERAE	Details ...	27	-0.653518	-2.28386	0	0.000101151	0.03	758	tags=52%, list=16%, signal=61%
GOBP_ENTRY_INTO_HOST	GOBP_ENTRY_INTO_HOST	Details ...	45	-0.594617	-2.28373	0	0.00010087	0.03	1155	tags=62%, list=24%, signal=81%
MEBARKI_HCC_PROGENITOR_WNT_UP_CTNNB1_INDEPENDENT	MEBARKI_HCC_PROGENITOR_WNT_UP_CTNNB1_INDEPENDENT	Details ...	15	-0.766102	-2.28282	0	0.000100591	0.03	374	tags=67%, list=8%, signal=72%
GSE13485_PRE_VS_POST_YF17D_VACCINATION_PBMC_DN	GSE13485_PRE_VS_POST_YF17D_VACCINATION_PBMC_DN	Details ...	64	-0.498417	-2.28279	0	0.000100313	0.03	1082	tags=48%, list=22%, signal=61%
WONG_ENDMETRIUM_CANCER_DN	WONG_ENDMETRIUM_CANCER_DN	Details ...	29	-0.664041	-2.28279	0	0.000100037	0.03	485	tags=59%, list=10%, signal=65%
WP_SENESCENCE_AND_AUTOPHAGY_IN_CANCER	WP_SENESCENCE_AND_AUTOPHAGY_IN_CANCER	Details ...	40	-0.586155	-2.28261	0	9.9762e-05	0.03	1429	tags=70%, list=29%, signal=98%
EBAUER_TARGETS_OF_PAX3_FOXO1_FUSION_UP	EBAUER_TARGETS_OF_PAX3_FOXO1_FUSION_UP	Details ...	52	-0.558502	-2.28227	0	9.94886e-05	0.03	637	tags=48%, list=13%, signal=55%
DAVICIONI_TARGETS_OF_PAX_FOXO1_FUSIONS_UP	DAVICIONI_TARGETS_OF_PAX_FOXO1_FUSIONS_UP	Details ...	99	-0.508652	-2.28125	0	0.000132132	0.04	885	tags=54%, list=18%, signal=64%
EGFR_UP.V1_UP	EGFR_UP.V1_UP	Details ...	83	-0.526485	-2.28114	0	0.000131772	0.04	1058	tags=59%, list=22%, signal=74%
THUM_SYSTOLIC_HEART_FAILURE_UP	THUM_SYSTOLIC_HEART_FAILURE_UP	Details ...	114	-0.480971	-2.28105	0	0.000131414	0.04	1402	tags=57%, list=29%, signal=78%
KOYAMA_SEMA3B_TARGETS_UP	KOYAMA_SEMA3B_TARGETS_UP	Details ...	75	-0.518085	-2.27958	0	0.000131057	0.04	488	tags=35%, list=10%, signal=38%
NABA_SECRETED_FACTORS	NABA_SECRETED_FACTORS	Details ...	60	-0.547202	-2.27921	0	0.000130703	0.04	874	tags=60%, list=18%, signal=72%
GSE37533_PPARG1_FOXP3_VS_FOXP3_TRANSDUCED_CD4_TCELL_PIOGLITAZONE_TREATED_UP	GSE37533_PPARG1_FOXP3_VS_FOXP3_TRANSDUCED_CD4_TCELL_PIOGLITAZONE_TREATED_UP	Details ...	68	-0.554374	-2.27853	0	0.000130351	0.04	1400	tags=72%, list=29%, signal=100%
DESCARTES_FETAL_INTESTINE_SMOOTH_MUSCLE_CELLS	DESCARTES_FETAL_INTESTINE_SMOOTH_MUSCLE_CELLS	Details ...	17	-0.732547	-2.27813	0	0.000130001	0.04	504	tags=71%, list=10%, signal=78%
MODULE_88	MODULE_88	Details ...	210	-0.445352	-2.27805	0	0.000129652	0.04	884	tags=45%, list=18%, signal=52%
KOKKINAKIS_METHIONINE_DEPRIVATION_48HR_UP	KOKKINAKIS_METHIONINE_DEPRIVATION_48HR_UP	Details ...	48	-0.59343	-2.2778	0	0.000129305	0.04	784	tags=50%, list=16%, signal=59%
GOBP_TUBE_DEVELOPMENT	GOBP_TUBE_DEVELOPMENT	Details ...	282	-0.422821	-2.27776	0	0.00012896	0.04	844	tags=40%, list=17%, signal=46%
HALLMARK_APOPTOSIS	HALLMARK_APOPTOSIS	Details ...	62	-0.540045	-2.27547	0	0.00016087	0.05	870	tags=47%, list=18%, signal=56%
BRUECKNER_TARGETS_OF_MIRLET7A3_DN	BRUECKNER_TARGETS_OF_MIRLET7A3_DN	Details ...	34	-0.606476	-2.27498	0	0.000160443	0.05	1239	tags=71%, list=25%, signal=94%
MURARO_PANCREAS_ACINAR_CELL	MURARO_PANCREAS_ACINAR_CELL	Details ...	253	-0.430227	-2.27439	0	0.000160019	0.05	1147	tags=42%, list=23%, signal=52%
HIRSCH_CELLULAR_TRANSFORMATION_SIGNATURE_UP	HIRSCH_CELLULAR_TRANSFORMATION_SIGNATURE_UP	Details ...	94	-0.489291	-2.27398	0	0.000159596	0.05	1116	tags=54%, list=23%, signal=69%
PTEN_DN.V2_UP	PTEN_DN.V2_UP	Details ...	30	-0.633261	-2.27187	0	0.000190811	0.06	649	tags=50%, list=13%, signal=57%
GOBP_ENDOCRINE_PROCESS	GOBP_ENDOCRINE_PROCESS	Details ...	20	-0.66502	-2.27081	0	0.00019031	0.06	741	tags=55%, list=15%, signal=65%
TSAI_RESPONSE_TO_RADIATION_THERAPY	TSAI_RESPONSE_TO_RADIATION_THERAPY	Details ...	17	-0.743164	-2.27078	0	0.000189812	0.06	814	tags=76%, list=17%, signal=91%
GOBP_BLOOD_VESSEL_MORPHOGENESIS	GOBP_BLOOD_VESSEL_MORPHOGENESIS	Details ...	169	-0.459524	-2.27072	0	0.000189317	0.06	1185	tags=56%, list=24%, signal=71%
GOBP_REGULATION_OF_TRANSMEMBRANE_RECEPTOR_PROTEIN_SERINE_THREONINE_KINASE_SIGNALING_PATHWAY	GOBP_REGULATION_OF_TRANSMEMBRANE_RECEPTOR_PROTEIN_SERINE_THREONINE_KINASE_SIGNALING_PATHWAY	Details ...	73	-0.546154	-2.27033	0	0.000188824	0.06	1020	tags=62%, list=21%, signal=77%
KHETCHOUMIAN_TRIM24_TARGETS_UP	KHETCHOUMIAN_TRIM24_TARGETS_UP	Details ...	25	-0.644451	-2.26978	0	0.000188333	0.06	881	tags=68%, list=18%, signal=83%
MODULE_64	MODULE_64	Details ...	114	-0.519751	-2.2688	0	0.000187845	0.06	845	tags=51%, list=17%, signal=60%
MODULE_23	MODULE_23	Details ...	136	-0.466993	-2.2675	0	0.00018736	0.06	864	tags=43%, list=18%, signal=51%
GSE42021_TREG_PLN_VS_CD24LO_TREG_THYMUS_DN	GSE42021_TREG_PLN_VS_CD24LO_TREG_THYMUS_DN	Details ...	69	-0.537634	-2.2627	0	0.000186877	0.06	1086	tags=58%, list=22%, signal=73%
DURANTE_ADULT_OLFACTORY_NEUROEPITHELIUM_VASCULAR_SMOOTH_MUSCLE_CELLS	DURANTE_ADULT_OLFACTORY_NEUROEPITHELIUM_VASCULAR_SMOOTH_MUSCLE_CELLS	Details ...	44	-0.566931	-2.26248	0	0.000186397	0.06	781	tags=55%, list=16%, signal=64%
GSE1112_HY_CD8AB_VS_HY_CD8AA_THYMOCYTE_RTOC_CULTURE_UP	GSE1112_HY_CD8AB_VS_HY_CD8AA_THYMOCYTE_RTOC_CULTURE_UP	Details ...	39	-0.559214	-2.26247	0	0.000185919	0.06	1084	tags=62%, list=22%, signal=78%
GSE6259_FLT3L_INDUCED_DEC205_POS_DC_VS_CD8_TCELL_DN	GSE6259_FLT3L_INDUCED_DEC205_POS_DC_VS_CD8_TCELL_DN	Details ...	52	-0.538992	-2.26188	0	0.000185443	0.06	801	tags=42%, list=16%, signal=50%
CONCANNON_APOPTOSIS_BY_EPOXOMICIN_UP	CONCANNON_APOPTOSIS_BY_EPOXOMICIN_UP	Details ...	86	-0.503863	-2.26135	0	0.00018497	0.06	1010	tags=51%, list=21%, signal=63%
LEE_BMP2_TARGETS_UP	LEE_BMP2_TARGETS_UP	Details ...	223	-0.428165	-2.26133	0	0.000184499	0.06	901	tags=44%, list=18%, signal=51%
GOBP_NEGATIVE_REGULATION_OF_RESPONSE_TO_WOUNDING	GOBP_NEGATIVE_REGULATION_OF_RESPONSE_TO_WOUNDING	Details ...	26	-0.671113	-2.26007	0	0.000184031	0.06	476	tags=54%, list=10%, signal=59%
GSE22886_DAY0_VS_DAY1_MONOCYTE_IN_CULTURE_DN	GSE22886_DAY0_VS_DAY1_MONOCYTE_IN_CULTURE_DN	Details ...	59	-0.530733	-2.25942	0	0.000183565	0.06	1470	tags=68%, list=30%, signal=96%
HALLMARK_HYPOXIA	HALLMARK_HYPOXIA	Details ...	62	-0.51597	-2.25934	0	0.000183102	0.06	845	tags=55%, list=17%, signal=65%
GOBP_POSITIVE_REGULATION_OF_RESPONSE_TO_CYTOKINE_STIMULUS	GOBP_POSITIVE_REGULATION_OF_RESPONSE_TO_CYTOKINE_STIMULUS	Details ...	22	-0.656026	-2.25786	0	0.000182641	0.06	611	tags=50%, list=13%, signal=57%
JECHLINGER_EPITHELIAL_TO_MESENCHYMAL_TRANSITION_UP	JECHLINGER_EPITHELIAL_TO_MESENCHYMAL_TRANSITION_UP	Details ...	34	-0.634563	-2.2565	0	0.000182182	0.06	1082	tags=68%, list=22%, signal=86%
MODULE_524	MODULE_524	Details ...	18	-0.674588	-2.25643	0	0.000181725	0.06	948	tags=72%, list=19%, signal=89%
GAUCHER_PBMC_YF_VAX_STAMARIL_UNKNOWN_AGE_7DY_UP	GAUCHER_PBMC_YF_VAX_STAMARIL_UNKNOWN_AGE_7DY_UP	Details ...	97	-0.486173	-2.25556	0	0.000181271	0.06	1082	tags=46%, list=22%, signal=58%
FRIDMAN_SENESCENCE_UP	FRIDMAN_SENESCENCE_UP	Details ...	31	-0.669472	-2.25516	0	0.000180819	0.06	1086	tags=74%, list=22%, signal=95%
ANDERSEN_CHOLANGIOCARCINOMA_CLASS2	ANDERSEN_CHOLANGIOCARCINOMA_CLASS2	Details ...	53	-0.552189	-2.25446	0	0.000210416	0.07	683	tags=43%, list=14%, signal=50%
MIKKELSEN_MEF_LCP_WITH_H3K4ME3	MIKKELSEN_MEF_LCP_WITH_H3K4ME3	Details ...	39	-0.613265	-2.25403	0	0.000209894	0.07	819	tags=54%, list=17%, signal=64%
GOBP_REGULATION_OF_RESPONSE_TO_WOUNDING	GOBP_REGULATION_OF_RESPONSE_TO_WOUNDING	Details ...	55	-0.546103	-2.25323	0	0.000209374	0.07	504	tags=40%, list=10%, signal=44%
GOBP_POSITIVE_REGULATION_OF_LEUKOCYTE_CHEMOTAXIS	GOBP_POSITIVE_REGULATION_OF_LEUKOCYTE_CHEMOTAXIS	Details ...	21	-0.681313	-2.25308	0	0.000208857	0.07	599	tags=57%, list=12%, signal=65%
SANA_RESPONSE_TO_IFNG_DN	SANA_RESPONSE_TO_IFNG_DN	Details ...	32	-0.610544	-2.25217	0	0.000208343	0.07	375	tags=31%, list=8%, signal=34%
HALLMARK_TNFA_SIGNALING_VIA_NFKB	HALLMARK_TNFA_SIGNALING_VIA_NFKB	Details ...	75	-0.524922	-2.2518	0	0.000207831	0.07	870	tags=53%, list=18%, signal=64%
DESCARTES_FETAL_LIVER_MESOTHELIAL_CELLS	DESCARTES_FETAL_LIVER_MESOTHELIAL_CELLS	Details ...	71	-0.544932	-2.24981	0	0.000207322	0.07	549	tags=46%, list=11%, signal=52%
HP_HEMOPTYSIS	HP_HEMOPTYSIS	Details ...	19	-0.663742	-2.24808	0	0.000236144	0.08	784	tags=68%, list=16%, signal=81%
GSE1460_INTRATHYMIC_T_PROGENITOR_VS_THYMIC_STROMAL_CELL_DN	GSE1460_INTRATHYMIC_T_PROGENITOR_VS_THYMIC_STROMAL_CELL_DN	Details ...	78	-0.519277	-2.24785	0	0.000235568	0.08	1180	tags=56%, list=24%, signal=73%
GOBP_POSITIVE_REGULATION_OF_VASCULATURE_DEVELOPMENT	GOBP_POSITIVE_REGULATION_OF_VASCULATURE_DEVELOPMENT	Details ...	38	-0.561542	-2.2474	0	0.000234995	0.08	660	tags=47%, list=14%, signal=54%
TRAVAGLINI_LUNG_TREM2_DENDRITIC_CELL	TRAVAGLINI_LUNG_TREM2_DENDRITIC_CELL	Details ...	174	-0.447869	-2.24728	0	0.000234425	0.08	1173	tags=47%, list=24%, signal=60%
HP_INTRACRANIAL_HEMORRHAGE	HP_INTRACRANIAL_HEMORRHAGE	Details ...	41	-0.563033	-2.24694	0	0.000233857	0.08	763	tags=44%, list=16%, signal=52%
GRAHAM_CML_DIVIDING_VS_NORMAL_QUIESCENT_DN	GRAHAM_CML_DIVIDING_VS_NORMAL_QUIESCENT_DN	Details ...	30	-0.667747	-2.24552	0	0.000233292	0.08	831	tags=70%, list=17%, signal=84%
NABA_ECM_GLYCOPROTEINS	NABA_ECM_GLYCOPROTEINS	Details ...	57	-0.555636	-2.24525	0	0.00023273	0.08	571	tags=53%, list=12%, signal=59%
HP_BRUISING_SUSCEPTIBILITY	HP_BRUISING_SUSCEPTIBILITY	Details ...	47	-0.557917	-2.24521	0	0.000232171	0.08	1401	tags=74%, list=29%, signal=103%
MENON_FETAL_KIDNEY_3_STROMAL_CELLS	MENON_FETAL_KIDNEY_3_STROMAL_CELLS	Details ...	40	-0.607369	-2.24172	0	0.000260506	0.09	976	tags=65%, list=20%, signal=81%
BUSSLINGER_ESOPHAGEAL_LATE_SUPRABASAL_CELLS	BUSSLINGER_ESOPHAGEAL_LATE_SUPRABASAL_CELLS	Details ...	34	-0.594812	-2.24123	0	0.000259883	0.09	910	tags=59%, list=19%, signal=72%
AMIT_SERUM_RESPONSE_120_MCF10A	AMIT_SERUM_RESPONSE_120_MCF10A	Details ...	23	-0.650898	-2.24112	0	0.000259263	0.09	1027	tags=65%, list=21%, signal=82%
BUYTAERT_PHOTODYNAMIC_THERAPY_STRESS_UP	BUYTAERT_PHOTODYNAMIC_THERAPY_STRESS_UP	Details ...	247	-0.421018	-2.24107	0	0.000258646	0.09	1742	tags=64%, list=36%, signal=95%
GOCC_COLLAGEN_TRIMER	GOCC_COLLAGEN_TRIMER	Details ...	24	-0.632728	-2.24087	0	0.000258031	0.09	374	tags=54%, list=8%, signal=58%
GOBP_REGULATION_OF_LEUKOCYTE_CHEMOTAXIS	GOBP_REGULATION_OF_LEUKOCYTE_CHEMOTAXIS	Details ...	27	-0.625375	-2.24084	0	0.00025742	0.09	599	tags=48%, list=12%, signal=55%
JINESH_BLEBBISHIELD_VS_LIVE_CONTROL_DN	JINESH_BLEBBISHIELD_VS_LIVE_CONTROL_DN	Details ...	89	-0.509492	-2.24082	0	0.000256811	0.09	788	tags=44%, list=16%, signal=51%
FLETCHER_PBMC_BCG_10W_INFANT_BCG_STIMULATED_VS_UNSTIMULATED_10W_UP	FLETCHER_PBMC_BCG_10W_INFANT_BCG_STIMULATED_VS_UNSTIMULATED_10W_UP	Details ...	36	-0.604495	-2.24072	0	0.000256206	0.09	640	tags=47%, list=13%, signal=54%
HP_STROKE	HP_STROKE	Details ...	35	-0.606713	-2.23838	0	0.000255603	0.09	1445	tags=74%, list=30%, signal=105%
HP_ABNORMAL_ELASTICITY_OF_SKIN	HP_ABNORMAL_ELASTICITY_OF_SKIN	Details ...	52	-0.536775	-2.23782	0	0.000255003	0.09	847	tags=44%, list=17%, signal=53%
GOBP_INTERFERON_GAMMA_MEDIATED_SIGNALING_PATHWAY	GOBP_INTERFERON_GAMMA_MEDIATED_SIGNALING_PATHWAY	Details ...	34	-0.615253	-2.23721	0	0.000254406	0.09	1545	tags=82%, list=32%, signal=120%
GOBP_TISSUE_MIGRATION	GOBP_TISSUE_MIGRATION	Details ...	87	-0.507401	-2.23611	0	0.000253811	0.09	1025	tags=49%, list=21%, signal=61%
GOMF_SERINE_TYPE_ENDOPEPTIDASE_INHIBITOR_ACTIVITY	GOMF_SERINE_TYPE_ENDOPEPTIDASE_INHIBITOR_ACTIVITY	Details ...	17	-0.65438	-2.23594	0	0.000253219	0.09	976	tags=82%, list=20%, signal=103%
NAKAMURA_ADIPOGENESIS_EARLY_DN	NAKAMURA_ADIPOGENESIS_EARLY_DN	Details ...	20	-0.702573	-2.23412	0	0.000252631	0.09	814	tags=80%, list=17%, signal=96%
GSE34156_UNTREATED_VS_6H_NOD2_LIGAND_TREATED_MONOCYTE_DN	GSE34156_UNTREATED_VS_6H_NOD2_LIGAND_TREATED_MONOCYTE_DN	Details ...	56	-0.589196	-2.23393	0	0.000252044	0.09	777	tags=50%, list=16%, signal=59%
GOBP_ENDODERM_FORMATION	GOBP_ENDODERM_FORMATION	Details ...	21	-0.700236	-2.23357	0	0.000251461	0.09	594	tags=67%, list=12%, signal=76%
WALLACE_PROSTATE_CANCER_RACE_UP	WALLACE_PROSTATE_CANCER_RACE_UP	Details ...	72	-0.526731	-2.23246	0	0.00025088	0.09	682	tags=47%, list=14%, signal=54%
MODULE_122	MODULE_122	Details ...	51	-0.564772	-2.23009	0	0.000278063	0.09	876	tags=65%, list=18%, signal=78%
FLETCHER_PBMC_BCG_10W_INFANT_PPD_STIMULATED_VS_UNSTIMULATED_10W_UP	FLETCHER_PBMC_BCG_10W_INFANT_PPD_STIMULATED_VS_UNSTIMULATED_10W_UP	Details ...	22	-0.689155	-2.22964	0	0.000277424	0.09	376	tags=45%, list=8%, signal=49%
MODULE_419	MODULE_419	Details ...	22	-0.68764	-2.22865	0	0.000276787	0.09	948	tags=73%, list=19%, signal=90%
ELVIDGE_HIF1A_TARGETS_DN	ELVIDGE_HIF1A_TARGETS_DN	Details ...	33	-0.628732	-2.22823	0	0.000276154	0.09	1122	tags=73%, list=23%, signal=94%
MENSE_HYPOXIA_UP	MENSE_HYPOXIA_UP	Details ...	36	-0.581763	-2.22747	0	0.000275523	0.09	845	tags=53%, list=17%, signal=63%
LI_INDUCED_T_TO_NATURAL_KILLER_UP	LI_INDUCED_T_TO_NATURAL_KILLER_UP	Details ...	97	-0.517231	-2.22684	0	0.000330109	0.11	918	tags=53%, list=19%, signal=63%
GSE1432_1H_VS_6H_IFNG_MICROGLIA_DN	GSE1432_1H_VS_6H_IFNG_MICROGLIA_DN	Details ...	57	-0.552589	-2.22627	0	0.000329359	0.11	1457	tags=61%, list=30%, signal=86%
TARTE_PLASMA_CELL_VS_PLASMABLAST_UP	TARTE_PLASMA_CELL_VS_PLASMABLAST_UP	Details ...	102	-0.472822	-2.22494	0	0.000327869	0.11	1132	tags=52%, list=23%, signal=66%
REACTOME_MET_ACTIVATES_PTK2_SIGNALING	REACTOME_MET_ACTIVATES_PTK2_SIGNALING	Details ...	16	-0.692694	-2.22449	0	0.000327129	0.11	374	tags=56%, list=8%, signal=61%
GSE3982_BASOPHIL_VS_TH2_UP	GSE3982_BASOPHIL_VS_TH2_UP	Details ...	56	-0.517629	-2.22408	0	0.000326392	0.11	1291	tags=61%, list=26%, signal=82%
DACOSTA_UV_RESPONSE_VIA_ERCC3_DN	DACOSTA_UV_RESPONSE_VIA_ERCC3_DN	Details ...	241	-0.443062	-2.22369	0	0.000325658	0.11	1150	tags=40%, list=24%, signal=50%
GOBP_FORMATION_OF_PRIMARY_GERM_LAYER	GOBP_FORMATION_OF_PRIMARY_GERM_LAYER	Details ...	39	-0.573005	-2.22347	0	0.000324928	0.11	655	tags=54%, list=13%, signal=62%
REACTOME_ASSEMBLY_OF_COLLAGEN_FIBRILS_AND_OTHER_MULTIMERIC_STRUCTURES	REACTOME_ASSEMBLY_OF_COLLAGEN_FIBRILS_AND_OTHER_MULTIMERIC_STRUCTURES	Details ...	27	-0.667878	-2.22347	0	0.000324201	0.11	964	tags=81%, list=20%, signal=101%
GOBP_NEGATIVE_REGULATION_OF_TRANSFORMING_GROWTH_FACTOR_BETA_RECEPTOR_SIGNALING_PATHWAY	GOBP_NEGATIVE_REGULATION_OF_TRANSFORMING_GROWTH_FACTOR_BETA_RECEPTOR_SIGNALING_PATHWAY	Details ...	29	-0.621205	-2.22313	0	0.000323478	0.11	1020	tags=66%, list=21%, signal=82%
GSE13485_DAY1_VS_DAY7_YF17D_VACCINE_PBMC_DN	GSE13485_DAY1_VS_DAY7_YF17D_VACCINE_PBMC_DN	Details ...	65	-0.529642	-2.22301	0	0.000322757	0.11	1352	tags=60%, list=28%, signal=82%
GSE1112_HY_CD8AB_VS_HY_CD8AA_THYMOCYTE_RTOC_CULTURE_DN	GSE1112_HY_CD8AB_VS_HY_CD8AA_THYMOCYTE_RTOC_CULTURE_DN	Details ...	56	-0.524006	-2.22296	0	0.00032204	0.11	1159	tags=54%, list=24%, signal=69%
GOMF_CELL_ADHESION_MOLECULE_BINDING	GOMF_CELL_ADHESION_MOLECULE_BINDING	Details ...	178	-0.449236	-2.22231	0	0.000321326	0.11	1028	tags=43%, list=21%, signal=52%
NABA_ECM_REGULATORS	NABA_ECM_REGULATORS	Details ...	47	-0.580784	-2.2223	0	0.000320615	0.11	982	tags=64%, list=20%, signal=79%
GSE9316_IL6_KO_VS_IFNG_KO_INVIVO_EXPANDED_CD4_TCELL_DN	GSE9316_IL6_KO_VS_IFNG_KO_INVIVO_EXPANDED_CD4_TCELL_DN	Details ...	59	-0.52172	-2.22084	0	0.000319907	0.11	818	tags=42%, list=17%, signal=50%
HP_THORACIC_AORTIC_ANEURYSM	HP_THORACIC_AORTIC_ANEURYSM	Details ...	31	-0.648725	-2.22054	0	0.000319203	0.11	652	tags=55%, list=13%, signal=63%
HP_ABNORMAL_SCLERA_MORPHOLOGY	HP_ABNORMAL_SCLERA_MORPHOLOGY	Details ...	34	-0.630726	-2.22037	0	0.000318501	0.11	758	tags=47%, list=16%, signal=55%
DER_IFN_ALPHA_RESPONSE_UP	DER_IFN_ALPHA_RESPONSE_UP	Details ...	26	-0.625513	-2.21925	0	0.000317803	0.11	1544	tags=85%, list=32%, signal=123%
GOMF_EXTRACELLULAR_MATRIX_STRUCTURAL_CONSTITUENT_CONFERRING_TENSILE_STRENGTH	GOMF_EXTRACELLULAR_MATRIX_STRUCTURAL_CONSTITUENT_CONFERRING_TENSILE_STRENGTH	Details ...	18	-0.655416	-2.21895	0	0.000317107	0.11	374	tags=56%, list=8%, signal=60%
GSE21546_WT_VS_SAP1A_KO_AND_ELK1_KO_ANTI_CD3_STIM_DP_THYMOCYTES_UP	GSE21546_WT_VS_SAP1A_KO_AND_ELK1_KO_ANTI_CD3_STIM_DP_THYMOCYTES_UP	Details ...	73	-0.512325	-2.21888	0	0.000316415	0.11	1207	tags=59%, list=25%, signal=77%
GSE36888_UNTREATED_VS_IL2_TREATED_TCELL_17H_DN	GSE36888_UNTREATED_VS_IL2_TREATED_TCELL_17H_DN	Details ...	62	-0.547366	-2.21806	0	0.000315725	0.11	845	tags=48%, list=17%, signal=58%
KEGG_HEMATOPOIETIC_CELL_LINEAGE	KEGG_HEMATOPOIETIC_CELL_LINEAGE	Details ...	15	-0.741735	-2.21763	0	0.000315039	0.11	665	tags=73%, list=14%, signal=85%
ZHONG_SECRETOME_OF_LUNG_CANCER_AND_FIBROBLAST	ZHONG_SECRETOME_OF_LUNG_CANCER_AND_FIBROBLAST	Details ...	47	-0.539619	-2.21728	0	0.000314356	0.11	890	tags=47%, list=18%, signal=57%
DELYS_THYROID_CANCER_UP	DELYS_THYROID_CANCER_UP	Details ...	152	-0.457239	-2.21707	0	0.000313675	0.11	862	tags=45%, list=18%, signal=53%
GSE37534_UNTREATED_VS_PIOGLITAZONE_TREATED_CD4_TCELL_PPARG1_AND_FOXP3_TRASDUCED_DN	GSE37534_UNTREATED_VS_PIOGLITAZONE_TREATED_CD4_TCELL_PPARG1_AND_FOXP3_TRASDUCED_DN	Details ...	57	-0.546888	-2.21578	0	0.00033907	0.11	1409	tags=72%, list=29%, signal=100%
LAKE_ADULT_KIDNEY_C26_MESANGIAL_CELLS	LAKE_ADULT_KIDNEY_C26_MESANGIAL_CELLS	Details ...	59	-0.530414	-2.21521	0	0.000337611	0.11	1426	tags=76%, list=29%, signal=106%
GSE37533_PPARG2_FOXP3_VS_FOXP3_TRANSDUCED_CD4_TCELL_DN	GSE37533_PPARG2_FOXP3_VS_FOXP3_TRANSDUCED_CD4_TCELL_DN	Details ...	73	-0.511225	-2.21517	0	0.000336887	0.11	1100	tags=59%, list=23%, signal=75%
GSE18791_CTRL_VS_NEWCASTLE_VIRUS_DC_8H_DN	GSE18791_CTRL_VS_NEWCASTLE_VIRUS_DC_8H_DN	Details ...	57	-0.535211	-2.21431	0	0.000336165	0.11	795	tags=47%, list=16%, signal=56%
GRAESSMANN_APOPTOSIS_BY_SERUM_DEPRIVATION_UP	GRAESSMANN_APOPTOSIS_BY_SERUM_DEPRIVATION_UP	Details ...	176	-0.453148	-2.21329	0	0.000335447	0.11	1087	tags=47%, list=22%, signal=58%
HP_SPARSE_OR_ABSENT_EYELASHES	HP_SPARSE_OR_ABSENT_EYELASHES	Details ...	19	-0.69442	-2.21284	0	0.000360586	0.12	415	tags=42%, list=8%, signal=46%
BAELDE_DIABETIC_NEPHROPATHY_DN	BAELDE_DIABETIC_NEPHROPATHY_DN	Details ...	178	-0.434237	-2.21197	0	0.000359819	0.12	1138	tags=47%, list=23%, signal=59%
GSE10325_CD4_TCELL_VS_LUPUS_CD4_TCELL_DN	GSE10325_CD4_TCELL_VS_LUPUS_CD4_TCELL_DN	Details ...	67	-0.499104	-2.21131	0	0.000359055	0.12	1082	tags=54%, list=22%, signal=68%
GSE1460_DP_VS_CD4_THYMOCYTE_DN	GSE1460_DP_VS_CD4_THYMOCYTE_DN	Details ...	68	-0.514719	-2.2113	0	0.000358294	0.12	1235	tags=63%, list=25%, signal=83%
GOMF_PEPTIDASE_REGULATOR_ACTIVITY	GOMF_PEPTIDASE_REGULATOR_ACTIVITY	Details ...	46	-0.559656	-2.21111	0	0.000357537	0.12	900	tags=54%, list=18%, signal=66%
CSR_EARLY_UP.V1_UP	CSR_EARLY_UP.V1_UP	Details ...	53	-0.54462	-2.21084	0	0.000382157	0.13	741	tags=38%, list=15%, signal=44%
CORDENONSI_YAP_CONSERVED_SIGNATURE	CORDENONSI_YAP_CONSERVED_SIGNATURE	Details ...	27	-0.652482	-2.2108	0	0.000381352	0.13	746	tags=52%, list=15%, signal=61%
VANHARANTA_UTERINE_FIBROID_DN	VANHARANTA_UTERINE_FIBROID_DN	Details ...	27	-0.623174	-2.21038	0	0.000380551	0.13	685	tags=56%, list=14%, signal=64%
GSE11057_EFF_MEM_VS_CENT_MEM_CD4_TCELL_UP	GSE11057_EFF_MEM_VS_CENT_MEM_CD4_TCELL_UP	Details ...	64	-0.525867	-2.20978	0	0.000378959	0.13	1238	tags=61%, list=25%, signal=81%
GOBP_REGULATION_OF_CELLULAR_RESPONSE_TO_GROWTH_FACTOR_STIMULUS	GOBP_REGULATION_OF_CELLULAR_RESPONSE_TO_GROWTH_FACTOR_STIMULUS	Details ...	84	-0.479236	-2.20872	0	0.000403531	0.14	1025	tags=55%, list=21%, signal=68%
GAUSSMANN_MLL_AF4_FUSION_TARGETS_F_UP	GAUSSMANN_MLL_AF4_FUSION_TARGETS_F_UP	Details ...	59	-0.560557	-2.20855	0	0.00040269	0.14	729	tags=51%, list=15%, signal=59%
GOBP_COLLAGEN_METABOLIC_PROCESS	GOBP_COLLAGEN_METABOLIC_PROCESS	Details ...	30	-0.652297	-2.20812	0	0.000401853	0.14	1095	tags=80%, list=22%, signal=102%
FORTSCHEGGER_PHF8_TARGETS_DN	FORTSCHEGGER_PHF8_TARGETS_DN	Details ...	229	-0.445218	-2.20714	0	0.00040102	0.14	1217	tags=46%, list=25%, signal=59%
GOBP_POSITIVE_REGULATION_OF_LEUKOCYTE_MIGRATION	GOBP_POSITIVE_REGULATION_OF_LEUKOCYTE_MIGRATION	Details ...	34	-0.608427	-2.20641	0	0.000400189	0.14	611	tags=47%, list=13%, signal=53%
HP_ABNORMAL_CARDIAC_VENTRICULAR_FUNCTION	HP_ABNORMAL_CARDIAC_VENTRICULAR_FUNCTION	Details ...	23	-0.65746	-2.20499	0	0.000424359	0.15	917	tags=61%, list=19%, signal=75%
GSE17721_0.5H_VS_12H_CPG_BMDC_DN	GSE17721_0.5H_VS_12H_CPG_BMDC_DN	Details ...	53	-0.547544	-2.20462	0	0.000423484	0.15	642	tags=40%, list=13%, signal=45%
CUI_TCF21_TARGETS_2_DN	CUI_TCF21_TARGETS_2_DN	Details ...	280	-0.42426	-2.20296	0	0.000422613	0.15	1291	tags=50%, list=26%, signal=64%
PID_SYNDECAN_1_PATHWAY	PID_SYNDECAN_1_PATHWAY	Details ...	20	-0.668176	-2.20239	0	0.000446574	0.16	374	tags=55%, list=8%, signal=59%
AIZARANI_LIVER_C10_MVECS_1	AIZARANI_LIVER_C10_MVECS_1	Details ...	97	-0.477206	-2.2019	0	0.000445659	0.16	1027	tags=56%, list=21%, signal=69%
ERWIN_COHEN_BLOOD_VACCINE_TC_83_AGE_23_48YO_VACCINATED_VS_CONTROL_7DY_UP	ERWIN_COHEN_BLOOD_VACCINE_TC_83_AGE_23_48YO_VACCINATED_VS_CONTROL_7DY_UP	Details ...	26	-0.619582	-2.20181	0	0.000444748	0.16	1082	tags=69%, list=22%, signal=88%
GOBP_ENDOTHELIAL_CELL_PROLIFERATION	GOBP_ENDOTHELIAL_CELL_PROLIFERATION	Details ...	51	-0.547253	-2.20162	0	0.00044384	0.16	1025	tags=57%, list=21%, signal=71%
WGGAATGY_TEF1_Q6	WGGAATGY_TEF1_Q6	Details ...	103	-0.488721	-2.20076	0	0.000442936	0.16	917	tags=45%, list=19%, signal=54%
CSR_LATE_UP.V1_DN	CSR_LATE_UP.V1_DN	Details ...	48	-0.560199	-2.20059	0	0.000442036	0.16	971	tags=56%, list=20%, signal=70%
MODULE_52	MODULE_52	Details ...	156	-0.466216	-2.20042	0	0.000441139	0.16	884	tags=40%, list=18%, signal=47%
GOBP_ANIMAL_ORGAN_MORPHOGENESIS	GOBP_ANIMAL_ORGAN_MORPHOGENESIS	Details ...	258	-0.422393	-2.19893	0	0.000440246	0.16	659	tags=33%, list=13%, signal=36%
GOBP_ENZYME_LINKED_RECEPTOR_PROTEIN_SIGNALING_PATHWAY	GOBP_ENZYME_LINKED_RECEPTOR_PROTEIN_SIGNALING_PATHWAY	Details ...	282	-0.407154	-2.19828	0	0.000439357	0.16	1108	tags=45%, list=23%, signal=54%
LI_WILMS_TUMOR_VS_FETAL_KIDNEY_1_UP	LI_WILMS_TUMOR_VS_FETAL_KIDNEY_1_UP	Details ...	68	-0.524202	-2.19717	0	0.000438471	0.16	896	tags=53%, list=18%, signal=64%
ZHANG_RESPONSE_TO_IKK_INHIBITOR_AND_TNF_UP	ZHANG_RESPONSE_TO_IKK_INHIBITOR_AND_TNF_UP	Details ...	70	-0.519173	-2.19512	0	0.000437589	0.16	746	tags=44%, list=15%, signal=52%
MODULE_521	MODULE_521	Details ...	17	-0.685673	-2.19387	0	0.00043671	0.16	884	tags=71%, list=18%, signal=86%
GSE7768_OVA_ALONE_VS_OVA_WITH_LPS_IMMUNIZED_MOUSE_WHOLE_SPLEEN_6H_DN	GSE7768_OVA_ALONE_VS_OVA_WITH_LPS_IMMUNIZED_MOUSE_WHOLE_SPLEEN_6H_DN	Details ...	58	-0.503689	-2.19385	0	0.000435835	0.16	870	tags=45%, list=18%, signal=54%
ESC_J1_UP_LATE.V1_UP	ESC_J1_UP_LATE.V1_UP	Details ...	49	-0.526962	-2.19364	0	0.000434963	0.16	1016	tags=63%, list=21%, signal=79%
TRAVAGLINI_LUNG_AIRWAY_SMOOTH_MUSCLE_CELL	TRAVAGLINI_LUNG_AIRWAY_SMOOTH_MUSCLE_CELL	Details ...	63	-0.513492	-2.19149	0	0.000434095	0.16	637	tags=40%, list=13%, signal=45%
HIRSCH_CELLULAR_TRANSFORMATION_SIGNATURE_DN	HIRSCH_CELLULAR_TRANSFORMATION_SIGNATURE_DN	Details ...	36	-0.595393	-2.1913	0	0.00043323	0.16	1079	tags=58%, list=22%, signal=74%
GSE1460_CD4_THYMOCYTE_VS_THYMIC_STROMAL_CELL_DN	GSE1460_CD4_THYMOCYTE_VS_THYMIC_STROMAL_CELL_DN	Details ...	77	-0.520484	-2.19125	0	0.000432369	0.16	1158	tags=55%, list=24%, signal=70%
BROWNE_HCMV_INFECTION_16HR_DN	BROWNE_HCMV_INFECTION_16HR_DN	Details ...	24	-0.637409	-2.19115	0	0.000431511	0.16	1105	tags=71%, list=23%, signal=91%
REACTOME_COLLAGEN_DEGRADATION	REACTOME_COLLAGEN_DEGRADATION	Details ...	25	-0.628549	-2.18988	0	0.000454668	0.17	890	tags=72%, list=18%, signal=88%
GSE42021_CD24INT_VS_CD24LOW_TREG_THYMUS_DN	GSE42021_CD24INT_VS_CD24LOW_TREG_THYMUS_DN	Details ...	56	-0.538158	-2.18915	0	0.000453769	0.17	1382	tags=73%, list=28%, signal=101%
WANG_SMARCE1_TARGETS_DN	WANG_SMARCE1_TARGETS_DN	Details ...	127	-0.451977	-2.18878	0	0.000452874	0.17	832	tags=36%, list=17%, signal=43%
GOBP_BIOLOGICAL_PROCESS_INVOLVED_IN_INTERACTION_WITH_HOST	GOBP_BIOLOGICAL_PROCESS_INVOLVED_IN_INTERACTION_WITH_HOST	Details ...	62	-0.494433	-2.18846	0	0.000451983	0.17	1155	tags=50%, list=24%, signal=65%
GOBP_REGULATION_OF_SYSTEMIC_ARTERIAL_BLOOD_PRESSURE	GOBP_REGULATION_OF_SYSTEMIC_ARTERIAL_BLOOD_PRESSURE	Details ...	26	-0.648689	-2.18794	0	0.000451095	0.17	490	tags=50%, list=10%, signal=55%
LIU_SMARCA4_TARGETS	LIU_SMARCA4_TARGETS	Details ...	23	-0.620646	-2.18792	0	0.00045021	0.17	781	tags=57%, list=16%, signal=67%
GOBP_GASTRULATION	GOBP_GASTRULATION	Details ...	57	-0.534114	-2.18759	0	0.000449329	0.17	655	tags=46%, list=13%, signal=52%
GERY_CEBP_TARGETS	GERY_CEBP_TARGETS	Details ...	49	-0.541668	-2.18655	0	0.000448452	0.17	582	tags=41%, list=12%, signal=46%
REACTOME_NON_INTEGRIN_MEMBRANE_ECM_INTERACTIONS	REACTOME_NON_INTEGRIN_MEMBRANE_ECM_INTERACTIONS	Details ...	23	-0.62706	-2.1851	0	0.000470961	0.18	738	tags=61%, list=15%, signal=71%
MARKEY_RB1_CHRONIC_LOF_DN	MARKEY_RB1_CHRONIC_LOF_DN	Details ...	36	-0.620045	-2.18407	0	0.000493485	0.18	1081	tags=67%, list=22%, signal=85%
GOBP_SKIN_DEVELOPMENT	GOBP_SKIN_DEVELOPMENT	Details ...	70	-0.514054	-2.18357	0	0.000492526	0.18	902	tags=46%, list=18%, signal=55%
GOBP_POSITIVE_REGULATION_OF_ENDOTHELIAL_CELL_MIGRATION	GOBP_POSITIVE_REGULATION_OF_ENDOTHELIAL_CELL_MIGRATION	Details ...	32	-0.587468	-2.18328	0	0.000491572	0.18	1427	tags=75%, list=29%, signal=105%
DACOSTA_UV_RESPONSE_VIA_ERCC3_TTD_DN	DACOSTA_UV_RESPONSE_VIA_ERCC3_TTD_DN	Details ...	26	-0.599229	-2.1822	0	0.000490621	0.18	1094	tags=62%, list=22%, signal=79%
PID_AVB3_INTEGRIN_PATHWAY	PID_AVB3_INTEGRIN_PATHWAY	Details ...	35	-0.611692	-2.18007	0	0.000536108	0.2	597	tags=51%, list=12%, signal=58%
KRASNOSELSKAYA_ILF3_TARGETS_UP	KRASNOSELSKAYA_ILF3_TARGETS_UP	Details ...	16	-0.700492	-2.18006	0	0.000535075	0.2	650	tags=63%, list=13%, signal=72%
DESCARTES_FETAL_HEART_EPICARDIAL_FAT_CELLS	DESCARTES_FETAL_HEART_EPICARDIAL_FAT_CELLS	Details ...	18	-0.680709	-2.17983	0	0.000534046	0.2	814	tags=67%, list=17%, signal=80%
GSE19888_ADENOSINE_A3R_INH_VS_INH_PRETREAT_AND_ACT_WITH_TCELL_MEMBRANES_MAST_CELL_UP	GSE19888_ADENOSINE_A3R_INH_VS_INH_PRETREAT_AND_ACT_WITH_TCELL_MEMBRANES_MAST_CELL_UP	Details ...	61	-0.519878	-2.1787	0	0.000533021	0.2	1358	tags=57%, list=28%, signal=78%
MODULE_223	MODULE_223	Details ...	41	-0.543204	-2.17857	0	0.000532	0.2	787	tags=49%, list=16%, signal=58%
GSE9988_ANTI_TREM1_VS_CTRL_TREATED_MONOCYTES_UP	GSE9988_ANTI_TREM1_VS_CTRL_TREATED_MONOCYTES_UP	Details ...	81	-0.497305	-2.17688	0	0.000530983	0.2	1002	tags=51%, list=21%, signal=63%
FAN_EMBRYONIC_CTX_BIG_GROUPS_BRAIN_IMMUNE	FAN_EMBRYONIC_CTX_BIG_GROUPS_BRAIN_IMMUNE	Details ...	51	-0.529511	-2.17653	0	0.000529969	0.2	1319	tags=69%, list=27%, signal=93%
GSE17721_ALL_VS_24H_PAM3CSK4_BMDC_DN	GSE17721_ALL_VS_24H_PAM3CSK4_BMDC_DN	Details ...	58	-0.518652	-2.17595	0	0.00052896	0.2	967	tags=45%, list=20%, signal=55%
GSE1432_6H_VS_24H_IFNG_MICROGLIA_UP	GSE1432_6H_VS_24H_IFNG_MICROGLIA_UP	Details ...	62	-0.510969	-2.17575	0	0.000527954	0.2	1886	tags=81%, list=39%, signal=130%
HP_TRANSIENT_ISCHEMIC_ATTACK	HP_TRANSIENT_ISCHEMIC_ATTACK	Details ...	22	-0.641458	-2.17568	0	0.000526953	0.2	1445	tags=82%, list=30%, signal=116%
GOBP_SUPRAMOLECULAR_FIBER_ORGANIZATION	GOBP_SUPRAMOLECULAR_FIBER_ORGANIZATION	Details ...	211	-0.436706	-2.17521	0	0.000548893	0.21	1178	tags=49%, list=24%, signal=62%
HP_ABNORMALITY_OF_BLOOD_CIRCULATION	HP_ABNORMALITY_OF_BLOOD_CIRCULATION	Details ...	83	-0.481237	-2.17397	0	0.000547855	0.21	799	tags=37%, list=16%, signal=44%
GSE36888_STAT5_AB_KNOCKIN_VS_WT_TCELL_IL2_TREATED_17H_DN	GSE36888_STAT5_AB_KNOCKIN_VS_WT_TCELL_IL2_TREATED_17H_DN	Details ...	56	-0.521892	-2.17354	0	0.000546821	0.21	1213	tags=59%, list=25%, signal=77%
GSE13485_DAY3_VS_DAY7_YF17D_VACCINE_PBMC_DN	GSE13485_DAY3_VS_DAY7_YF17D_VACCINE_PBMC_DN	Details ...	61	-0.50821	-2.17342	0	0.000545791	0.21	1134	tags=57%, list=23%, signal=74%
GSE7460_TCONV_VS_TREG_LN_DN	GSE7460_TCONV_VS_TREG_LN_DN	Details ...	48	-0.531281	-2.17226	0	0.000590355	0.22	830	tags=50%, list=17%, signal=60%
BROWN_MYELOID_CELL_DEVELOPMENT_UP	BROWN_MYELOID_CELL_DEVELOPMENT_UP	Details ...	50	-0.543355	-2.17184	0	0.000589248	0.22	1439	tags=70%, list=29%, signal=98%
MIKKELSEN_IPS_WITH_HCP_H3K27ME3	MIKKELSEN_IPS_WITH_HCP_H3K27ME3	Details ...	16	-0.688715	-2.17108	0	0.000610791	0.23	519	tags=63%, list=11%, signal=70%
WEINMANN_ADAPTATION_TO_HYPOXIA_DN	WEINMANN_ADAPTATION_TO_HYPOXIA_DN	Details ...	18	-0.737429	-2.17105	0	0.000609649	0.23	785	tags=78%, list=16%, signal=92%
GSE24634_TEFF_VS_TCONV_DAY5_IN_CULTURE_DN	GSE24634_TEFF_VS_TCONV_DAY5_IN_CULTURE_DN	Details ...	60	-0.492609	-2.1708	0	0.000608512	0.23	1422	tags=63%, list=29%, signal=88%
REACTOME_INTERFERON_GAMMA_SIGNALING	REACTOME_INTERFERON_GAMMA_SIGNALING	Details ...	29	-0.645952	-2.16936	0	0.0006298	0.24	1545	tags=90%, list=32%, signal=130%
GSE28737_BCL6_HET_VS_BCL6_KO_FOLLICULAR_BCELL_DN	GSE28737_BCL6_HET_VS_BCL6_KO_FOLLICULAR_BCELL_DN	Details ...	56	-0.542741	-2.16935	0	0.000628629	0.24	807	tags=46%, list=17%, signal=55%
GSE2935_UV_INACTIVATED_VS_LIVE_SENDAI_VIRUS_INF_MACROPHAGE_DN	GSE2935_UV_INACTIVATED_VS_LIVE_SENDAI_VIRUS_INF_MACROPHAGE_DN	Details ...	58	-0.517134	-2.16689	0	0.000627463	0.24	890	tags=52%, list=18%, signal=62%
ZWANG_CLASS_2_TRANSIENTLY_INDUCED_BY_EGF	ZWANG_CLASS_2_TRANSIENTLY_INDUCED_BY_EGF	Details ...	21	-0.649375	-2.16673	0	0.000626301	0.24	807	tags=67%, list=17%, signal=80%
GOMF_CADHERIN_BINDING	GOMF_CADHERIN_BINDING	Details ...	111	-0.470932	-2.1665	0	0.000625143	0.24	1234	tags=50%, list=25%, signal=65%
BROWNE_HCMV_INFECTION_48HR_DN	BROWNE_HCMV_INFECTION_48HR_DN	Details ...	144	-0.452404	-2.16608	0	0.00062399	0.24	976	tags=44%, list=20%, signal=54%
HALLMARK_IL2_STAT5_SIGNALING	HALLMARK_IL2_STAT5_SIGNALING	Details ...	59	-0.524242	-2.16544	0	0.000622841	0.24	925	tags=54%, list=19%, signal=66%
MODULE_121	MODULE_121	Details ...	24	-0.674794	-2.16247	0	0.000621696	0.24	629	tags=54%, list=13%, signal=62%
GOBP_DEFENSE_RESPONSE_TO_OTHER_ORGANISM	GOBP_DEFENSE_RESPONSE_TO_OTHER_ORGANISM	Details ...	243	-0.402108	-2.16229	0	0.000620555	0.24	1097	tags=39%, list=22%, signal=48%
ERWIN_COHEN_BLOOD_TC_83_AGE_23_48YO_VACCINATED_VS_CONTROL_2DY_UP	ERWIN_COHEN_BLOOD_TC_83_AGE_23_48YO_VACCINATED_VS_CONTROL_2DY_UP	Details ...	36	-0.560578	-2.16163	0	0.000619419	0.24	1082	tags=58%, list=22%, signal=74%
GAO_SMALL_INTESTINE_24W_C4_ENTEROCYTE_PROGENITOR_SUBTYPE_2	GAO_SMALL_INTESTINE_24W_C4_ENTEROCYTE_PROGENITOR_SUBTYPE_2	Details ...	15	-0.733902	-2.16023	0	0.000640317	0.25	502	tags=60%, list=10%, signal=67%
SAMOLS_TARGETS_OF_KHSV_MIRNAS_DN	SAMOLS_TARGETS_OF_KHSV_MIRNAS_DN	Details ...	26	-0.635773	-2.15944	0	0.000661064	0.26	740	tags=58%, list=15%, signal=68%
GSE5589_LPS_VS_LPS_AND_IL10_STIM_IL10_KO_MACROPHAGE_45MIN_UP	GSE5589_LPS_VS_LPS_AND_IL10_STIM_IL10_KO_MACROPHAGE_45MIN_UP	Details ...	62	-0.507662	-2.15897	0	0.00065986	0.26	1584	tags=74%, list=32%, signal=108%
MODULE_209	MODULE_209	Details ...	21	-0.696983	-2.15865	0	0.00065866	0.26	316	tags=52%, list=6%, signal=56%
GSE13484_UNSTIM_VS_3H_YF17D_VACCINE_STIM_PBMC_DN	GSE13484_UNSTIM_VS_3H_YF17D_VACCINE_STIM_PBMC_DN	Details ...	63	-0.533804	-2.1581	0	0.000657465	0.26	1022	tags=54%, list=21%, signal=67%
GOBP_HEART_MORPHOGENESIS	GOBP_HEART_MORPHOGENESIS	Details ...	63	-0.512725	-2.15762	0	0.000656274	0.26	651	tags=46%, list=13%, signal=52%
GSE3982_DC_VS_BCELL_UP	GSE3982_DC_VS_BCELL_UP	Details ...	58	-0.527595	-2.15704	0	0.000655087	0.26	1454	tags=69%, list=30%, signal=97%
GOBP_TUBE_MORPHOGENESIS	GOBP_TUBE_MORPHOGENESIS	Details ...	227	-0.41436	-2.15685	0	0.000675523	0.27	844	tags=40%, list=17%, signal=46%
GOBP_REGULATION_OF_CHEMOTAXIS	GOBP_REGULATION_OF_CHEMOTAXIS	Details ...	52	-0.529705	-2.15664	0	0.000674306	0.27	599	tags=40%, list=12%, signal=46%
HP_THICKENED_SKIN	HP_THICKENED_SKIN	Details ...	97	-0.48312	-2.15571	0	0.000694864	0.28	702	tags=35%, list=14%, signal=40%
REACTOME_COLLAGEN_FORMATION	REACTOME_COLLAGEN_FORMATION	Details ...	34	-0.60058	-2.155	0	0.000714988	0.29	976	tags=76%, list=20%, signal=95%
GOBP_MODULATION_BY_SYMBIONT_OF_ENTRY_INTO_HOST	GOBP_MODULATION_BY_SYMBIONT_OF_ENTRY_INTO_HOST	Details ...	15	-0.740861	-2.15239	0	0.000735303	0.3	1087	tags=87%, list=22%, signal=111%
VART_KSHV_INFECTION_ANGIOGENIC_MARKERS_UP	VART_KSHV_INFECTION_ANGIOGENIC_MARKERS_UP	Details ...	41	-0.543187	-2.15225	0	0.000733987	0.3	844	tags=61%, list=17%, signal=73%
REACTOME_INTERFERON_ALPHA_BETA_SIGNALING	REACTOME_INTERFERON_ALPHA_BETA_SIGNALING	Details ...	20	-0.643086	-2.15222	0	0.000732677	0.3	1358	tags=85%, list=28%, signal=117%
NUYTTEN_NIPP1_TARGETS_UP	NUYTTEN_NIPP1_TARGETS_UP	Details ...	195	-0.43806	-2.15097	0	0.000752849	0.31	1525	tags=57%, list=31%, signal=79%
PID_IL4_2PATHWAY	PID_IL4_2PATHWAY	Details ...	20	-0.645235	-2.15073	0	0.00075151	0.31	1176	tags=75%, list=24%, signal=98%
GSE2128_C57BL6_VS_NOD_CD4CD8_DP_THYMOCYTE_UP	GSE2128_C57BL6_VS_NOD_CD4CD8_DP_THYMOCYTE_UP	Details ...	54	-0.553593	-2.15004	0	0.000771896	0.32	1034	tags=52%, list=21%, signal=65%
GAO_ESOPHAGUS_25W_C4_FGFR1HIGH_EPITHELIAL_CELLS	GAO_ESOPHAGUS_25W_C4_FGFR1HIGH_EPITHELIAL_CELLS	Details ...	58	-0.531015	-2.14836	0	0.000791844	0.33	468	tags=36%, list=10%, signal=40%
GOBP_REGULATION_OF_CELLULAR_COMPONENT_MOVEMENT	GOBP_REGULATION_OF_CELLULAR_COMPONENT_MOVEMENT	Details ...	270	-0.406508	-2.14755	0	0.000790442	0.33	1027	tags=42%, list=21%, signal=51%
MODULE_107	MODULE_107	Details ...	21	-0.661804	-2.14742	0	0.000789046	0.33	1009	tags=76%, list=21%, signal=96%
GSE24634_TREG_VS_TCONV_POST_DAY5_IL4_CONVERSION_DN	GSE24634_TREG_VS_TCONV_POST_DAY5_IL4_CONVERSION_DN	Details ...	57	-0.511047	-2.14703	0	0.000787654	0.33	1475	tags=70%, list=30%, signal=99%
HAN_SATB1_TARGETS_UP	HAN_SATB1_TARGETS_UP	Details ...	141	-0.449665	-2.14618	0	0.000786267	0.33	1033	tags=44%, list=21%, signal=54%
RICKMAN_TUMOR_DIFFERENTIATED_MODERATELY_VS_POORLY_UP	RICKMAN_TUMOR_DIFFERENTIATED_MODERATELY_VS_POORLY_UP	Details ...	49	-0.562258	-2.14527	0	0.000805919	0.34	734	tags=41%, list=15%, signal=48%
SMID_BREAST_CANCER_LUMINAL_B_DN	SMID_BREAST_CANCER_LUMINAL_B_DN	Details ...	145	-0.452226	-2.14511	0	0.000804505	0.34	622	tags=40%, list=13%, signal=44%
DESCARTES_MAIN_FETAL_ENDOCARDIAL_CELLS	DESCARTES_MAIN_FETAL_ENDOCARDIAL_CELLS	Details ...	31	-0.579506	-2.14492	0	0.000803096	0.34	668	tags=61%, list=14%, signal=71%
GOMF_CYTOKINE_RECEPTOR_BINDING	GOMF_CYTOKINE_RECEPTOR_BINDING	Details ...	61	-0.524207	-2.14481	0	0.000801692	0.34	902	tags=48%, list=18%, signal=58%
COWLING_MYCN_TARGETS	COWLING_MYCN_TARGETS	Details ...	15	-0.757151	-2.14424	0	0.000821507	0.35	520	tags=67%, list=11%, signal=74%
SASSON_RESPONSE_TO_GONADOTROPHINS_DN	SASSON_RESPONSE_TO_GONADOTROPHINS_DN	Details ...	42	-0.597985	-2.1442	0	0.000820076	0.35	822	tags=48%, list=17%, signal=57%
DUTERTRE_ESTRADIOL_RESPONSE_6HR_DN	DUTERTRE_ESTRADIOL_RESPONSE_6HR_DN	Details ...	33	-0.549587	-2.1423	0	0.000818649	0.35	740	tags=45%, list=15%, signal=53%
GOBP_REGULATION_OF_SYSTEMIC_ARTERIAL_BLOOD_PRESSURE_MEDIATED_BY_A_CHEMICAL_SIGNAL	GOBP_REGULATION_OF_SYSTEMIC_ARTERIAL_BLOOD_PRESSURE_MEDIATED_BY_A_CHEMICAL_SIGNAL	Details ...	16	-0.681669	-2.14192	0	0.000817228	0.35	785	tags=63%, list=16%, signal=74%
FAN_OVARY_CL16_LYMPHATIC_ENDOTHELIAL_CELL	FAN_OVARY_CL16_LYMPHATIC_ENDOTHELIAL_CELL	Details ...	100	-0.483874	-2.14137	0	0.000815812	0.35	1196	tags=56%, list=24%, signal=73%
GSE1740_UNSTIM_VS_IFNA_STIMULATED_MCSF_DERIVED_MACROPHAGE_DN	GSE1740_UNSTIM_VS_IFNA_STIMULATED_MCSF_DERIVED_MACROPHAGE_DN	Details ...	51	-0.527327	-2.14127	0	0.0008144	0.35	1084	tags=55%, list=22%, signal=70%
BERENJENO_TRANSFORMED_BY_RHOA_REVERSIBLY_DN	BERENJENO_TRANSFORMED_BY_RHOA_REVERSIBLY_DN	Details ...	16	-0.728465	-2.14127	0	0.000812994	0.35	512	tags=56%, list=10%, signal=63%
GSE11961_FOLLICULAR_BCELL_VS_MEMORY_BCELL_DAY40_DN	GSE11961_FOLLICULAR_BCELL_VS_MEMORY_BCELL_DAY40_DN	Details ...	60	-0.553561	-2.14109	0	0.000811592	0.35	1064	tags=57%, list=22%, signal=72%
HOELZEL_NF1_TARGETS_DN	HOELZEL_NF1_TARGETS_DN	Details ...	39	-0.551271	-2.13989	0	0.000851745	0.36	520	tags=44%, list=11%, signal=48%
PID_FRA_PATHWAY	PID_FRA_PATHWAY	Details ...	15	-0.740898	-2.13975	0	0.000850281	0.36	591	tags=67%, list=12%, signal=76%
GOBP_POSITIVE_REGULATION_OF_EPITHELIAL_CELL_MIGRATION	GOBP_POSITIVE_REGULATION_OF_EPITHELIAL_CELL_MIGRATION	Details ...	43	-0.579532	-2.13963	0	0.000848823	0.36	1152	tags=60%, list=24%, signal=78%
GSE7460_FOXP3_MUT_VS_WT_ACT_TCONV_UP	GSE7460_FOXP3_MUT_VS_WT_ACT_TCONV_UP	Details ...	56	-0.517872	-2.13919	0	0.000868077	0.37	837	tags=48%, list=17%, signal=58%
GOTZMANN_EPITHELIAL_TO_MESENCHYMAL_TRANSITION_UP	GOTZMANN_EPITHELIAL_TO_MESENCHYMAL_TRANSITION_UP	Details ...	31	-0.643751	-2.13869	0	0.000866593	0.37	872	tags=55%, list=18%, signal=66%
LAIHO_COLORECTAL_CANCER_SERRATED_UP	LAIHO_COLORECTAL_CANCER_SERRATED_UP	Details ...	49	-0.537896	-2.13809	0	0.000865114	0.37	1400	tags=65%, list=29%, signal=91%
NAKAMURA_ADIPOGENESIS_LATE_DN	NAKAMURA_ADIPOGENESIS_LATE_DN	Details ...	19	-0.718082	-2.13757	0	0.000884117	0.38	637	tags=74%, list=13%, signal=84%
FLETCHER_PBMC_BCG_10W_INFANT_PPD_STIMULATED_VS_UNSTIMULATED_10W_DN	FLETCHER_PBMC_BCG_10W_INFANT_PPD_STIMULATED_VS_UNSTIMULATED_10W_DN	Details ...	61	-0.527204	-2.13673	0	0.000903062	0.39	1477	tags=75%, list=30%, signal=107%
GSE28783_ANTI_MIR33_VS_UNTREATED_ATHEROSCLEROSIS_MACROPHAGE_DN	GSE28783_ANTI_MIR33_VS_UNTREATED_ATHEROSCLEROSIS_MACROPHAGE_DN	Details ...	49	-0.518303	-2.13658	0	0.000901529	0.39	1143	tags=59%, list=23%, signal=76%
HP_ABNORMALITY_OF_EPIDERMAL_MORPHOLOGY	HP_ABNORMALITY_OF_EPIDERMAL_MORPHOLOGY	Details ...	16	-0.723535	-2.13646	0	0.000900001	0.39	702	tags=56%, list=14%, signal=65%
DE_YY1_TARGETS_DN	DE_YY1_TARGETS_DN	Details ...	34	-0.553074	-2.13544	0	0.000918791	0.4	1025	tags=50%, list=21%, signal=63%
ATF2_UP.V1_DN	ATF2_UP.V1_DN	Details ...	66	-0.493979	-2.13544	0	0.000917239	0.4	611	tags=39%, list=13%, signal=44%
GOBP_POSITIVE_REGULATION_OF_PEPTIDYL_SERINE_PHOSPHORYLATION	GOBP_POSITIVE_REGULATION_OF_PEPTIDYL_SERINE_PHOSPHORYLATION	Details ...	26	-0.581376	-2.13453	0	0.000936172	0.41	1031	tags=65%, list=21%, signal=82%
FAN_OVARY_CL2_PUTATIVE_EARLY_ATRETIC_FOLLICLE_THECAL_CELL_1	FAN_OVARY_CL2_PUTATIVE_EARLY_ATRETIC_FOLLICLE_THECAL_CELL_1	Details ...	39	-0.577974	-2.13449	0	0.000934596	0.41	689	tags=41%, list=14%, signal=47%
HP_SLENDER_FINGER	HP_SLENDER_FINGER	Details ...	39	-0.581246	-2.13364	0	0.000933026	0.41	847	tags=49%, list=17%, signal=58%
WANG_CISPLATIN_RESPONSE_AND_XPC_DN	WANG_CISPLATIN_RESPONSE_AND_XPC_DN	Details ...	59	-0.499253	-2.13292	0	0.00093146	0.41	1352	tags=61%, list=28%, signal=83%
PHONG_TNF_RESPONSE_NOT_VIA_P38	PHONG_TNF_RESPONSE_NOT_VIA_P38	Details ...	118	-0.457491	-2.13257	0	0.000950187	0.42	1354	tags=60%, list=28%, signal=81%
ONDER_CDH1_TARGETS_2_DN	ONDER_CDH1_TARGETS_2_DN	Details ...	118	-0.427947	-2.13229	0	0.000948598	0.42	740	tags=41%, list=15%, signal=47%
REACTOME_CELL_SURFACE_INTERACTIONS_AT_THE_VASCULAR_WALL	REACTOME_CELL_SURFACE_INTERACTIONS_AT_THE_VASCULAR_WALL	Details ...	39	-0.542891	-2.13167	0	0.000987255	0.43	742	tags=46%, list=15%, signal=54%
GSE17721_0.5H_VS_8H_CPG_BMDC_DN	GSE17721_0.5H_VS_8H_CPG_BMDC_DN	Details ...	51	-0.511518	-2.13151	0	0.00098561	0.43	781	tags=37%, list=16%, signal=44%
STK33_SKM_UP	STK33_SKM_UP	Details ...	84	-0.47669	-2.13129	0	0.00098397	0.43	941	tags=48%, list=19%, signal=58%
AIZARANI_LIVER_C13_LSECS_2	AIZARANI_LIVER_C13_LSECS_2	Details ...	86	-0.465527	-2.13125	0	0.000982335	0.43	1027	tags=55%, list=21%, signal=68%
HSIAO_LIVER_SPECIFIC_GENES	HSIAO_LIVER_SPECIFIC_GENES	Details ...	44	-0.546013	-2.13037	0	0.000980706	0.43	344	tags=34%, list=7%, signal=36%
HUMMERICH_SKIN_CANCER_PROGRESSION_UP	HUMMERICH_SKIN_CANCER_PROGRESSION_UP	Details ...	32	-0.616326	-2.12969	0	0.000979082	0.43	890	tags=69%, list=18%, signal=84%
GAUCHER_PBMC_YF_VAX_STAMARIL_UNKNOWN_AGE_10DY_UP	GAUCHER_PBMC_YF_VAX_STAMARIL_UNKNOWN_AGE_10DY_UP	Details ...	75	-0.505308	-2.12916	0	0.000977464	0.43	1082	tags=48%, list=22%, signal=61%
GSE22935_WT_VS_MYD88_KO_MACROPHAGE_48H_MBOVIS_BCG_STIM_DN	GSE22935_WT_VS_MYD88_KO_MACROPHAGE_48H_MBOVIS_BCG_STIM_DN	Details ...	53	-0.529048	-2.12862	0	0.000995781	0.44	1393	tags=60%, list=29%, signal=84%
TRAVAGLINI_LUNG_MACROPHAGE_CELL	TRAVAGLINI_LUNG_MACROPHAGE_CELL	Details ...	61	-0.523477	-2.12823	0	0.0010139	0.44	1160	tags=62%, list=24%, signal=81%
GSE27434_WT_VS_DNMT1_KO_TREG_DN	GSE27434_WT_VS_DNMT1_KO_TREG_DN	Details ...	64	-0.504029	-2.12642	0	0.00103037	0.44	1210	tags=59%, list=25%, signal=78%
LEIN_CHOROID_PLEXUS_MARKERS	LEIN_CHOROID_PLEXUS_MARKERS	Details ...	34	-0.582701	-2.12635	0	0.00102868	0.44	527	tags=47%, list=11%, signal=52%
GOBP_CELL_CHEMOTAXIS	GOBP_CELL_CHEMOTAXIS	Details ...	72	-0.50445	-2.12601	0	0.00104667	0.44	928	tags=47%, list=19%, signal=57%
GSE21774_CD62L_POS_CD56_DIM_VS_CD62L_NEG_CD56_DIM_NK_CELL_UP	GSE21774_CD62L_POS_CD56_DIM_VS_CD62L_NEG_CD56_DIM_NK_CELL_UP	Details ...	51	-0.480614	-2.12569	0	0.00104496	0.44	1441	tags=65%, list=29%, signal=91%
ACOSTA_PROLIFERATION_INDEPENDENT_MYC_TARGETS_DN	ACOSTA_PROLIFERATION_INDEPENDENT_MYC_TARGETS_DN	Details ...	33	-0.540565	-2.12415	0	0.00106289	0.45	1648	tags=76%, list=34%, signal=114%
GSE17721_0.5H_VS_24H_CPG_BMDC_DN	GSE17721_0.5H_VS_24H_CPG_BMDC_DN	Details ...	69	-0.51191	-2.12213	0	0.00106116	0.45	1045	tags=54%, list=21%, signal=67%
HU_FETAL_RETINA_RPE	HU_FETAL_RETINA_RPE	Details ...	95	-0.455708	-2.12121	0	0.00105943	0.45	890	tags=47%, list=18%, signal=57%
HP_GENERALIZED_ABNORMALITY_OF_SKIN	HP_GENERALIZED_ABNORMALITY_OF_SKIN	Details ...	227	-0.40851	-2.12073	0	0.00107737	0.46	660	tags=28%, list=14%, signal=31%
FULCHER_INFLAMMATORY_RESPONSE_LECTIN_VS_LPS_UP	FULCHER_INFLAMMATORY_RESPONSE_LECTIN_VS_LPS_UP	Details ...	160	-0.427423	-2.11889	0	0.00111527	0.47	813	tags=32%, list=17%, signal=37%
GOBP_RESPONSE_TO_TYPE_I_INTERFERON	GOBP_RESPONSE_TO_TYPE_I_INTERFERON	Details ...	31	-0.595063	-2.11877	0	0.00111347	0.47	1377	tags=74%, list=28%, signal=103%
GERHOLD_ADIPOGENESIS_DN	GERHOLD_ADIPOGENESIS_DN	Details ...	31	-0.576388	-2.11787	0	0.00111167	0.47	825	tags=58%, list=17%, signal=69%
CHARAFE_BREAST_CANCER_BASAL_VS_MESENCHYMAL_DN	CHARAFE_BREAST_CANCER_BASAL_VS_MESENCHYMAL_DN	Details ...	22	-0.686261	-2.11662	0	0.0011295	0.48	807	tags=64%, list=17%, signal=76%
GOBP_MUSCLE_CELL_DEVELOPMENT	GOBP_MUSCLE_CELL_DEVELOPMENT	Details ...	52	-0.520216	-2.11645	0	0.00112768	0.48	840	tags=50%, list=17%, signal=60%
GSE22886_CTRL_VS_LPS_24H_DC_DN	GSE22886_CTRL_VS_LPS_24H_DC_DN	Details ...	62	-0.502373	-2.11532	0	0.00116472	0.49	1082	tags=55%, list=22%, signal=70%
APPIERTO_RESPONSE_TO_FENRETINIDE_DN	APPIERTO_RESPONSE_TO_FENRETINIDE_DN	Details ...	17	-0.694453	-2.11485	0	0.00116285	0.49	797	tags=59%, list=16%, signal=70%
CHEN_METABOLIC_SYNDROM_NETWORK	CHEN_METABOLIC_SYNDROM_NETWORK	Details ...	362	-0.398611	-2.11454	0	0.00116098	0.49	1324	tags=50%, list=27%, signal=64%
PID_ARF6_TRAFFICKING_PATHWAY	PID_ARF6_TRAFFICKING_PATHWAY	Details ...	16	-0.712943	-2.11419	0	0.00115913	0.49	665	tags=56%, list=14%, signal=65%
AIZARANI_LIVER_C17_HEPATOCYTES_3	AIZARANI_LIVER_C17_HEPATOCYTES_3	Details ...	22	-0.647978	-2.11414	0	0.00115727	0.49	309	tags=50%, list=6%, signal=53%
DER_IFN_BETA_RESPONSE_UP	DER_IFN_BETA_RESPONSE_UP	Details ...	38	-0.57204	-2.11411	0	0.00115543	0.49	1321	tags=66%, list=27%, signal=89%
MODULE_45	MODULE_45	Details ...	148	-0.417319	-2.11318	0	0.00115359	0.49	859	tags=40%, list=18%, signal=47%
GSE44732_UNSTIM_VS_IL27_STIM_IMATURE_DC_DN	GSE44732_UNSTIM_VS_IL27_STIM_IMATURE_DC_DN	Details ...	48	-0.512046	-2.11276	0	0.00115176	0.49	1042	tags=46%, list=21%, signal=58%
GOBP_REGULATION_OF_BLOOD_PRESSURE	GOBP_REGULATION_OF_BLOOD_PRESSURE	Details ...	48	-0.535487	-2.11228	0	0.00114993	0.49	637	tags=44%, list=13%, signal=50%
GSE40685_TREG_VS_FOXP3_KO_TREG_PRECURSOR_DN	GSE40685_TREG_VS_FOXP3_KO_TREG_PRECURSOR_DN	Details ...	52	-0.533103	-2.10978	0	0.00130105	0.52	863	tags=48%, list=18%, signal=58%
HP_ABNORMAL_ORAL_MUCOSA_MORPHOLOGY	HP_ABNORMAL_ORAL_MUCOSA_MORPHOLOGY	Details ...	79	-0.493446	-2.10977	0	0.00129899	0.52	652	tags=34%, list=13%, signal=39%
GOBP_POSITIVE_REGULATION_OF_EPITHELIAL_CELL_PROLIFERATION	GOBP_POSITIVE_REGULATION_OF_EPITHELIAL_CELL_PROLIFERATION	Details ...	57	-0.488603	-2.10968	0	0.00129694	0.52	1123	tags=54%, list=23%, signal=70%
MIR3201	MIR3201	Details ...	26	-0.6206	-2.1092	0	0.0012949	0.52	661	tags=46%, list=14%, signal=53%
ZHONG_SECRETOME_OF_LUNG_CANCER_AND_ENDOTHELIUM	ZHONG_SECRETOME_OF_LUNG_CANCER_AND_ENDOTHELIUM	Details ...	27	-0.622412	-2.10901	0	0.00129286	0.52	914	tags=59%, list=19%, signal=72%
DESCARTES_FETAL_PLACENTA_IGFBP1_DKK1_POSITIVE_CELLS	DESCARTES_FETAL_PLACENTA_IGFBP1_DKK1_POSITIVE_CELLS	Details ...	37	-0.566932	-2.10889	0	0.00129082	0.52	629	tags=54%, list=13%, signal=62%
GOBP_SKELETAL_SYSTEM_DEVELOPMENT	GOBP_SKELETAL_SYSTEM_DEVELOPMENT	Details ...	135	-0.445006	-2.10887	0	0.0012888	0.52	659	tags=38%, list=13%, signal=42%
SENESE_HDAC1_TARGETS_DN	SENESE_HDAC1_TARGETS_DN	Details ...	94	-0.469124	-2.10853	0	0.00128678	0.52	882	tags=46%, list=18%, signal=55%
TRAVAGLINI_LUNG_MYOFIBROBLAST_CELL	TRAVAGLINI_LUNG_MYOFIBROBLAST_CELL	Details ...	28	-0.634183	-2.10722	0	0.00130365	0.52	619	tags=61%, list=13%, signal=69%
GSE22140_GERMFREE_VS_SPF_MOUSE_CD4_TCELL_DN	GSE22140_GERMFREE_VS_SPF_MOUSE_CD4_TCELL_DN	Details ...	91	-0.490144	-2.10587	0	0.00132053	0.52	1085	tags=46%, list=22%, signal=58%
HP_ABNORMAL_AORTIC_VALVE_PHYSIOLOGY	HP_ABNORMAL_AORTIC_VALVE_PHYSIOLOGY	Details ...	41	-0.536128	-2.105	0	0.00131847	0.52	847	tags=46%, list=17%, signal=56%
GSE18791_UNSTIM_VS_NEWCATSLE_VIRUS_DC_6H_DN	GSE18791_UNSTIM_VS_NEWCATSLE_VIRUS_DC_6H_DN	Details ...	56	-0.515355	-2.1044	0	0.00131642	0.52	1452	tags=70%, list=30%, signal=98%
REACTOME_MET_PROMOTES_CELL_MOTILITY	REACTOME_MET_PROMOTES_CELL_MOTILITY	Details ...	19	-0.657214	-2.10429	0	0.00133323	0.52	655	tags=58%, list=13%, signal=67%
GSE30971_CTRL_VS_LPS_STIM_MACROPHAGE_WBP7_HET_2H_UP	GSE30971_CTRL_VS_LPS_STIM_MACROPHAGE_WBP7_HET_2H_UP	Details ...	61	-0.482303	-2.10264	0	0.00133116	0.52	1160	tags=57%, list=24%, signal=74%
GSE11961_MEMORY_BCELL_DAY7_VS_GERMINAL_CENTER_BCELL_DAY7_UP	GSE11961_MEMORY_BCELL_DAY7_VS_GERMINAL_CENTER_BCELL_DAY7_UP	Details ...	57	-0.50534	-2.1023	0	0.00132909	0.52	1319	tags=67%, list=27%, signal=90%
GSE7852_TREG_VS_TCONV_LN_UP	GSE7852_TREG_VS_TCONV_LN_UP	Details ...	54	-0.512604	-2.10143	0	0.00136425	0.53	1066	tags=52%, list=22%, signal=66%
GSE29618_PRE_VS_DAY7_POST_TIV_FLU_VACCINE_BCELL_UP	GSE29618_PRE_VS_DAY7_POST_TIV_FLU_VACCINE_BCELL_UP	Details ...	46	-0.503337	-2.09999	0	0.00141807	0.55	519	tags=41%, list=11%, signal=46%
GSE3920_UNTREATED_VS_IFNG_TREATED_ENDOTHELIAL_CELL_UP	GSE3920_UNTREATED_VS_IFNG_TREATED_ENDOTHELIAL_CELL_UP	Details ...	34	-0.559621	-2.09989	0	0.00141588	0.55	926	tags=47%, list=19%, signal=58%
GOBP_AMEBOIDAL_TYPE_CELL_MIGRATION	GOBP_AMEBOIDAL_TYPE_CELL_MIGRATION	Details ...	113	-0.449896	-2.09904	0	0.0014137	0.55	1025	tags=47%, list=21%, signal=58%
HOWARD_DENDRITIC_CELL_INACT_MONOV_INFLUENZA_A_INDONESIA_05_2005_H5N1_AGE_18_49YO_1DY_UP	HOWARD_DENDRITIC_CELL_INACT_MONOV_INFLUENZA_A_INDONESIA_05_2005_H5N1_AGE_18_49YO_1DY_UP	Details ...	44	-0.552388	-2.09789	0	0.00144863	0.56	650	tags=43%, list=13%, signal=49%
KATSANOU_ELAVL1_TARGETS_UP	KATSANOU_ELAVL1_TARGETS_UP	Details ...	50	-0.529362	-2.09788	0	0.0014464	0.56	1286	tags=66%, list=26%, signal=89%
GSE26495_NAIVE_VS_PD1HIGH_CD8_TCELL_DN	GSE26495_NAIVE_VS_PD1HIGH_CD8_TCELL_DN	Details ...	73	-0.479421	-2.09735	0	0.0014813	0.57	1029	tags=52%, list=21%, signal=65%
REACTOME_MOLECULES_ASSOCIATED_WITH_ELASTIC_FIBRES	REACTOME_MOLECULES_ASSOCIATED_WITH_ELASTIC_FIBRES	Details ...	16	-0.664406	-2.09698	0	0.00147903	0.57	812	tags=81%, list=17%, signal=97%
GOBP_STRIATED_MUSCLE_CELL_DIFFERENTIATION	GOBP_STRIATED_MUSCLE_CELL_DIFFERENTIATION	Details ...	81	-0.461109	-2.09628	0	0.00149515	0.57	690	tags=36%, list=14%, signal=41%
GSE39820_CTRL_VS_IL1B_IL6_CD4_TCELL_DN	GSE39820_CTRL_VS_IL1B_IL6_CD4_TCELL_DN	Details ...	52	-0.494865	-2.09574	0	0.00151118	0.57	1147	tags=58%, list=23%, signal=75%
TRAVAGLINI_LUNG_MESOTHELIAL_CELL	TRAVAGLINI_LUNG_MESOTHELIAL_CELL	Details ...	211	-0.422292	-2.09571	0	0.00150888	0.57	926	tags=33%, list=19%, signal=39%
KOHOUTEK_CCNT1_TARGETS	KOHOUTEK_CCNT1_TARGETS	Details ...	21	-0.628831	-2.09513	0	0.00150658	0.57	1173	tags=67%, list=24%, signal=87%
GOBP_EPITHELIAL_CELL_PROLIFERATION	GOBP_EPITHELIAL_CELL_PROLIFERATION	Details ...	111	-0.466237	-2.09513	0	0.00150429	0.57	996	tags=48%, list=20%, signal=59%
GOBP_TISSUE_MORPHOGENESIS	GOBP_TISSUE_MORPHOGENESIS	Details ...	177	-0.433424	-2.09491	0	0.00152052	0.58	655	tags=34%, list=13%, signal=38%
GSE15930_STIM_VS_STIM_AND_IFNAB_48H_CD8_T_CELL_DN	GSE15930_STIM_VS_STIM_AND_IFNAB_48H_CD8_T_CELL_DN	Details ...	63	-0.499111	-2.0949	0	0.00151822	0.58	1355	tags=62%, list=28%, signal=85%
GSE35825_UNTREATED_VS_IFNA_STIM_MACROPHAGE_DN	GSE35825_UNTREATED_VS_IFNA_STIM_MACROPHAGE_DN	Details ...	55	-0.50499	-2.09319	0	0.00153409	0.58	1157	tags=58%, list=24%, signal=75%
CERVERA_SDHB_TARGETS_2	CERVERA_SDHB_TARGETS_2	Details ...	37	-0.553633	-2.09306	0	0.00153178	0.58	759	tags=57%, list=16%, signal=67%
GSE29618_PDC_VS_MDC_DAY7_FLU_VACCINE_DN	GSE29618_PDC_VS_MDC_DAY7_FLU_VACCINE_DN	Details ...	59	-0.503545	-2.09293	0	0.00152946	0.58	1339	tags=69%, list=27%, signal=95%
CERVERA_SDHB_TARGETS_1_UP	CERVERA_SDHB_TARGETS_1_UP	Details ...	44	-0.525393	-2.09185	0	0.00154542	0.58	486	tags=43%, list=10%, signal=48%
VALK_AML_CLUSTER_9	VALK_AML_CLUSTER_9	Details ...	15	-0.659907	-2.0898	0	0.00159514	0.6	937	tags=67%, list=19%, signal=82%
GSE14769_UNSTIM_VS_120MIN_LPS_BMDM_DN	GSE14769_UNSTIM_VS_120MIN_LPS_BMDM_DN	Details ...	70	-0.499729	-2.08931	0	0.00159275	0.6	1160	tags=57%, list=24%, signal=74%
GSE3039_ALPHAALPHA_CD8_TCELL_VS_B2_BCELL_DN	GSE3039_ALPHAALPHA_CD8_TCELL_VS_B2_BCELL_DN	Details ...	64	-0.485446	-2.08854	0	0.00160837	0.61	1111	tags=50%, list=23%, signal=64%
GSE20715_0H_VS_24H_OZONE_LUNG_DN	GSE20715_0H_VS_24H_OZONE_LUNG_DN	Details ...	69	-0.47494	-2.08843	0	0.00160597	0.61	807	tags=41%, list=17%, signal=48%
CHIARADONNA_NEOPLASTIC_TRANSFORMATION_CDC25_UP	CHIARADONNA_NEOPLASTIC_TRANSFORMATION_CDC25_UP	Details ...	40	-0.545148	-2.0859	0	0.00163964	0.62	843	tags=48%, list=17%, signal=57%
GOBP_EMBRYONIC_MORPHOGENESIS	GOBP_EMBRYONIC_MORPHOGENESIS	Details ...	158	-0.416979	-2.08522	0	0.00163719	0.62	655	tags=34%, list=13%, signal=38%
MYC_UP.V1_DN	MYC_UP.V1_DN	Details ...	49	-0.490602	-2.08426	0	0.00170416	0.65	787	tags=41%, list=16%, signal=48%
LAKE_ADULT_KIDNEY_C23_ENDOTHELIAL_CELLS_AVR	LAKE_ADULT_KIDNEY_C23_ENDOTHELIAL_CELLS_AVR	Details ...	51	-0.519079	-2.08344	0	0.00171953	0.66	1196	tags=55%, list=24%, signal=72%
GSE21546_UNSTIM_VS_ANTI_CD3_STIM_ELK1_KO_DP_THYMOCYTES_UP	GSE21546_UNSTIM_VS_ANTI_CD3_STIM_ELK1_KO_DP_THYMOCYTES_UP	Details ...	41	-0.566878	-2.08187	0	0.00178874	0.68	1134	tags=66%, list=23%, signal=85%
HARRIS_HYPOXIA	HARRIS_HYPOXIA	Details ...	29	-0.558559	-2.08086	0	0.00180135	0.68	881	tags=59%, list=18%, signal=71%
DER_IFN_GAMMA_RESPONSE_UP	DER_IFN_GAMMA_RESPONSE_UP	Details ...	25	-0.597139	-2.08059	0	0.00181643	0.68	1490	tags=76%, list=31%, signal=109%
GOMF_CYTOKINE_ACTIVITY	GOMF_CYTOKINE_ACTIVITY	Details ...	45	-0.543956	-2.08017	0	0.00183159	0.68	660	tags=53%, list=14%, signal=61%
GSE22229_UNTREATED_VS_IMMUNOSUPP_THERAPY_RENAL_TRANSPLANT_PATIENT_PBMC_DN	GSE22229_UNTREATED_VS_IMMUNOSUPP_THERAPY_RENAL_TRANSPLANT_PATIENT_PBMC_DN	Details ...	48	-0.51182	-2.07908	0	0.00188203	0.7	1421	tags=65%, list=29%, signal=90%
GSE46606_UNSTIM_VS_CD40L_IL2_IL5_3DAY_STIMULATED_IRF4MID_SORTED_BCELL_DN	GSE46606_UNSTIM_VS_CD40L_IL2_IL5_3DAY_STIMULATED_IRF4MID_SORTED_BCELL_DN	Details ...	55	-0.482311	-2.07849	0	0.00187926	0.7	1414	tags=58%, list=29%, signal=81%
GSE360_HIGH_DOSE_B_MALAYI_VS_M_TUBERCULOSIS_MAC_DN	GSE360_HIGH_DOSE_B_MALAYI_VS_M_TUBERCULOSIS_MAC_DN	Details ...	62	-0.478132	-2.07834	0	0.00187651	0.7	629	tags=35%, list=13%, signal=40%
TRAVAGLINI_LUNG_EREG_DENDRITIC_CELL	TRAVAGLINI_LUNG_EREG_DENDRITIC_CELL	Details ...	177	-0.395485	-2.0782	0	0.00187376	0.7	1359	tags=54%, list=28%, signal=72%
HP_PURPURA	HP_PURPURA	Details ...	24	-0.597724	-2.07791	0	0.00188864	0.7	1097	tags=63%, list=22%, signal=80%
GOBP_DEFENSE_RESPONSE	GOBP_DEFENSE_RESPONSE	Details ...	374	-0.377729	-2.07769	0	0.00188588	0.7	1097	tags=38%, list=22%, signal=46%
SMID_BREAST_CANCER_NORMAL_LIKE_UP	SMID_BREAST_CANCER_NORMAL_LIKE_UP	Details ...	116	-0.467707	-2.07754	0	0.00188313	0.7	716	tags=43%, list=15%, signal=49%
GOBP_POSITIVE_REGULATION_OF_INTERLEUKIN_8_PRODUCTION	GOBP_POSITIVE_REGULATION_OF_INTERLEUKIN_8_PRODUCTION	Details ...	20	-0.641483	-2.07687	0	0.00188039	0.7	558	tags=50%, list=11%, signal=56%
GOMF_ENDOPEPTIDASE_REGULATOR_ACTIVITY	GOMF_ENDOPEPTIDASE_REGULATOR_ACTIVITY	Details ...	38	-0.530769	-2.07591	0	0.00191292	0.7	877	tags=50%, list=18%, signal=60%
WIERENGA_STAT5A_TARGETS_GROUP2	WIERENGA_STAT5A_TARGETS_GROUP2	Details ...	18	-0.679451	-2.07549	0	0.00191014	0.7	984	tags=83%, list=20%, signal=104%
HARALAMBIEVA_PBMC_M_M_R_II_AGE_11_22YO_VACCINATED_VS_UNVACCINATED_7YR_UP	HARALAMBIEVA_PBMC_M_M_R_II_AGE_11_22YO_VACCINATED_VS_UNVACCINATED_7YR_UP	Details ...	253	-0.396634	-2.07529	0	0.00194212	0.71	800	tags=39%, list=16%, signal=44%
GSE21546_UNSTIM_VS_ANTI_CD3_STIM_DP_THYMOCYTES_UP	GSE21546_UNSTIM_VS_ANTI_CD3_STIM_DP_THYMOCYTES_UP	Details ...	74	-0.492962	-2.07492	0	0.00193931	0.71	753	tags=42%, list=15%, signal=49%
HP_SPARSE_EYEBROW	HP_SPARSE_EYEBROW	Details ...	24	-0.633562	-2.07441	0	0.00197149	0.71	415	tags=38%, list=8%, signal=41%
GOBP_REGULATION_OF_VASCULATURE_DEVELOPMENT	GOBP_REGULATION_OF_VASCULATURE_DEVELOPMENT	Details ...	74	-0.477211	-2.07401	0	0.00196865	0.71	884	tags=45%, list=18%, signal=54%
LAKE_ADULT_KIDNEY_C24_ENDOTHELIAL_CELLS_AEA_AND_DVR	LAKE_ADULT_KIDNEY_C24_ENDOTHELIAL_CELLS_AEA_AND_DVR	Details ...	59	-0.489687	-2.07396	0	0.00196581	0.71	1503	tags=73%, list=31%, signal=104%
GOBP_POSITIVE_REGULATION_OF_INTERLEUKIN_6_PRODUCTION	GOBP_POSITIVE_REGULATION_OF_INTERLEUKIN_6_PRODUCTION	Details ...	22	-0.609265	-2.07368	0	0.00196298	0.71	558	tags=50%, list=11%, signal=56%
GSE29618_MONOCYTE_VS_PDC_UP	GSE29618_MONOCYTE_VS_PDC_UP	Details ...	64	-0.47373	-2.07276	0	0.00197746	0.71	1471	tags=69%, list=30%, signal=97%
GOBP_CELL_MATRIX_ADHESION	GOBP_CELL_MATRIX_ADHESION	Details ...	76	-0.461324	-2.07219	0	0.00200925	0.71	855	tags=43%, list=18%, signal=52%
RUTELLA_RESPONSE_TO_HGF_VS_CSF2RB_AND_IL4_UP	RUTELLA_RESPONSE_TO_HGF_VS_CSF2RB_AND_IL4_UP	Details ...	123	-0.432419	-2.07112	0	0.00204101	0.71	1130	tags=46%, list=23%, signal=58%
DESCARTES_FETAL_THYMUS_VASCULAR_ENDOTHELIAL_CELLS	DESCARTES_FETAL_THYMUS_VASCULAR_ENDOTHELIAL_CELLS	Details ...	27	-0.593934	-2.06999	0	0.00205533	0.72	805	tags=59%, list=16%, signal=71%
MARTIN_VIRAL_GPCR_SIGNALING_UP	MARTIN_VIRAL_GPCR_SIGNALING_UP	Details ...	26	-0.599057	-2.06963	0	0.0020524	0.72	781	tags=46%, list=16%, signal=55%
MED25_TARGET_GENES	MED25_TARGET_GENES	Details ...	31	-0.549908	-2.06893	0	0.00208399	0.73	1312	tags=68%, list=27%, signal=92%
FAN_OVARY_CL12_T_LYMPHOCYTE_NK_CELL_2	FAN_OVARY_CL12_T_LYMPHOCYTE_NK_CELL_2	Details ...	47	-0.540351	-2.06867	0	0.00208102	0.73	1678	tags=77%, list=34%, signal=116%
CHIARADONNA_NEOPLASTIC_TRANSFORMATION_CDC25_DN	CHIARADONNA_NEOPLASTIC_TRANSFORMATION_CDC25_DN	Details ...	62	-0.494375	-2.06682	0	0.00218076	0.75	1234	tags=60%, list=25%, signal=79%
HP_PREMATURELY_AGED_APPEARANCE	HP_PREMATURELY_AGED_APPEARANCE	Details ...	30	-0.597093	-2.06641	0	0.00219477	0.75	495	tags=37%, list=10%, signal=41%
HP_PLANTAR_HYPERKERATOSIS	HP_PLANTAR_HYPERKERATOSIS	Details ...	15	-0.643108	-2.06628	0	0.00219166	0.75	369	tags=40%, list=8%, signal=43%
GOMF_PROTEASE_BINDING	GOMF_PROTEASE_BINDING	Details ...	36	-0.54539	-2.06564	0	0.00222277	0.76	793	tags=47%, list=16%, signal=56%
GSE19401_PLN_VS_PEYERS_PATCH_FOLLICULAR_DC_DN	GSE19401_PLN_VS_PEYERS_PATCH_FOLLICULAR_DC_DN	Details ...	60	-0.47089	-2.06447	0	0.00227074	0.77	855	tags=37%, list=18%, signal=44%
HAY_BONE_MARROW_PLATELET	HAY_BONE_MARROW_PLATELET	Details ...	52	-0.522723	-2.06432	0	0.00226753	0.77	1028	tags=54%, list=21%, signal=67%
HP_ABNORMALLY_LAX_OR_HYPEREXTENSIBLE_SKIN	HP_ABNORMALLY_LAX_OR_HYPEREXTENSIBLE_SKIN	Details ...	44	-0.559741	-2.06429	0	0.00226433	0.77	847	tags=48%, list=17%, signal=57%
GOBP_REGULATION_OF_RESPONSE_TO_CYTOKINE_STIMULUS	GOBP_REGULATION_OF_RESPONSE_TO_CYTOKINE_STIMULUS	Details ...	57	-0.518437	-2.06375	0	0.00227814	0.77	1183	tags=53%, list=24%, signal=69%
GOBP_ENDOTHELIAL_CELL_MIGRATION	GOBP_ENDOTHELIAL_CELL_MIGRATION	Details ...	65	-0.504736	-2.06336	0	0.0022921	0.78	1025	tags=52%, list=21%, signal=65%
MATSUMIYA_PBMC_MODIFIED_VACCINIA_ANKARA_VACCINE_AGE_18_55YO_2DY_UP	MATSUMIYA_PBMC_MODIFIED_VACCINIA_ANKARA_VACCINE_AGE_18_55YO_2DY_UP	Details ...	18	-0.614653	-2.063	0	0.00230255	0.78	1268	tags=78%, list=26%, signal=105%
GOBP_POSITIVE_REGULATION_OF_CELL_ADHESION	GOBP_POSITIVE_REGULATION_OF_CELL_ADHESION	Details ...	122	-0.440035	-2.06297	0	0.00229932	0.78	855	tags=41%, list=18%, signal=48%
GSE24142_ADULT_VS_FETAL_DN2_THYMOCYTE_UP	GSE24142_ADULT_VS_FETAL_DN2_THYMOCYTE_UP	Details ...	70	-0.486373	-2.06216	0	0.00232977	0.78	1421	tags=63%, list=29%, signal=87%
GOBP_RESPONSE_TO_BACTERIUM	GOBP_RESPONSE_TO_BACTERIUM	Details ...	136	-0.435454	-2.06206	0	0.00232652	0.78	558	tags=30%, list=11%, signal=33%
HP_ABNORMALITY_OF_THE_GINGIVA	HP_ABNORMALITY_OF_THE_GINGIVA	Details ...	57	-0.512471	-2.06062	0	0.00232328	0.78	651	tags=35%, list=13%, signal=40%
GSE1791_CTRL_VS_NEUROMEDINU_IN_T_CELL_LINE_3H_UP	GSE1791_CTRL_VS_NEUROMEDINU_IN_T_CELL_LINE_3H_UP	Details ...	47	-0.537969	-2.06013	0	0.00233691	0.78	764	tags=40%, list=16%, signal=47%
BRUINS_UVC_RESPONSE_LATE	BRUINS_UVC_RESPONSE_LATE	Details ...	320	-0.402147	-2.05956	0	0.00235035	0.78	1163	tags=39%, list=24%, signal=48%
MISSIAGLIA_REGULATED_BY_METHYLATION_UP	MISSIAGLIA_REGULATED_BY_METHYLATION_UP	Details ...	38	-0.535414	-2.05939	0	0.00238031	0.79	884	tags=58%, list=18%, signal=70%
GSE21927_SPLEEN_C57BL6_VS_4T1_TUMOR_BALBC_MONOCYTES_DN	GSE21927_SPLEEN_C57BL6_VS_4T1_TUMOR_BALBC_MONOCYTES_DN	Details ...	71	-0.48726	-2.05883	0	0.00239372	0.79	1106	tags=46%, list=23%, signal=59%
GOBP_NEGATIVE_REGULATION_OF_MULTICELLULAR_ORGANISMAL_PROCESS	GOBP_NEGATIVE_REGULATION_OF_MULTICELLULAR_ORGANISMAL_PROCESS	Details ...	261	-0.401002	-2.05876	0	0.00240711	0.79	847	tags=38%, list=17%, signal=43%
HP_JOINT_STIFFNESS	HP_JOINT_STIFFNESS	Details ...	47	-0.48882	-2.05862	0	0.00242044	0.79	698	tags=32%, list=14%, signal=37%
LINDGREN_BLADDER_CANCER_CLUSTER_3_DN	LINDGREN_BLADDER_CANCER_CLUSTER_3_DN	Details ...	60	-0.508313	-2.05828	0	0.0024171	0.79	1224	tags=62%, list=25%, signal=81%
GSE29618_BCELL_VS_MDC_DN	GSE29618_BCELL_VS_MDC_DN	Details ...	74	-0.4658	-2.0569	0	0.00249699	0.8	1315	tags=58%, list=27%, signal=78%
REACTOME_CYTOKINE_SIGNALING_IN_IMMUNE_SYSTEM	REACTOME_CYTOKINE_SIGNALING_IN_IMMUNE_SYSTEM	Details ...	187	-0.403336	-2.05611	0	0.00254344	0.8	1401	tags=55%, list=29%, signal=74%
REACTOME_CELL_JUNCTION_ORGANIZATION	REACTOME_CELL_JUNCTION_ORGANIZATION	Details ...	33	-0.560884	-2.05564	0	0.00253994	0.8	1199	tags=64%, list=25%, signal=84%
GSE360_CTRL_VS_L_DONOVANI_DC_DN	GSE360_CTRL_VS_L_DONOVANI_DC_DN	Details ...	47	-0.500874	-2.05529	0	0.00255307	0.8	891	tags=43%, list=18%, signal=52%
GOBP_ENDODERM_DEVELOPMENT	GOBP_ENDODERM_DEVELOPMENT	Details ...	29	-0.583972	-2.05523	0	0.00254957	0.8	594	tags=48%, list=12%, signal=55%
GSE19401_UNSTIM_VS_PAM2CSK4_STIM_FOLLICULAR_DC_DN	GSE19401_UNSTIM_VS_PAM2CSK4_STIM_FOLLICULAR_DC_DN	Details ...	59	-0.476907	-2.05418	0	0.00254608	0.8	1544	tags=61%, list=32%, signal=88%
SRF_Q5_01	SRF_Q5_01	Details ...	68	-0.494903	-2.05385	0	0.00254259	0.8	1024	tags=53%, list=21%, signal=66%
PID_P53_DOWNSTREAM_PATHWAY	PID_P53_DOWNSTREAM_PATHWAY	Details ...	38	-0.534268	-2.05217	0	0.00257205	0.8	890	tags=45%, list=18%, signal=54%
MODULE_164	MODULE_164	Details ...	17	-0.672943	-2.05166	0	0.00260177	0.8	825	tags=59%, list=17%, signal=71%
AIZARANI_LIVER_C7_EPCAM_POS_BILE_DUCT_CELLS_2	AIZARANI_LIVER_C7_EPCAM_POS_BILE_DUCT_CELLS_2	Details ...	88	-0.451479	-2.05128	0	0.00259822	0.8	966	tags=52%, list=20%, signal=64%
GOMF_PHOSPHATIDYLSERINE_BINDING	GOMF_PHOSPHATIDYLSERINE_BINDING	Details ...	19	-0.631944	-2.05109	0	0.00259469	0.8	306	tags=42%, list=6%, signal=45%
GOBP_BIOLOGICAL_ADHESION	GOBP_BIOLOGICAL_ADHESION	Details ...	443	-0.361391	-2.05027	0	0.00260756	0.81	846	tags=35%, list=17%, signal=38%
DAUER_STAT3_TARGETS_DN	DAUER_STAT3_TARGETS_DN	Details ...	22	-0.62813	-2.05002	0	0.00263678	0.83	1082	tags=77%, list=22%, signal=99%
GOBP_RESPONSE_TO_GROWTH_FACTOR	GOBP_RESPONSE_TO_GROWTH_FACTOR	Details ...	215	-0.400364	-2.04982	0	0.0026332	0.83	1025	tags=41%, list=21%, signal=50%
PID_ANGIOPOIETIN_RECEPTOR_PATHWAY	PID_ANGIOPOIETIN_RECEPTOR_PATHWAY	Details ...	18	-0.622211	-2.04918	0	0.00266242	0.83	742	tags=56%, list=15%, signal=65%
JISON_SICKLE_CELL_DISEASE_UP	JISON_SICKLE_CELL_DISEASE_UP	Details ...	56	-0.489818	-2.04913	0	0.00265882	0.83	1348	tags=61%, list=28%, signal=83%
GSE17974_IL4_AND_ANTI_IL12_VS_UNTREATED_6H_ACT_CD4_TCELL_DN	GSE17974_IL4_AND_ANTI_IL12_VS_UNTREATED_6H_ACT_CD4_TCELL_DN	Details ...	43	-0.511415	-2.04898	0	0.00265523	0.83	929	tags=49%, list=19%, signal=60%
NAKAMURA_ADIPOGENESIS_EARLY_UP	NAKAMURA_ADIPOGENESIS_EARLY_UP	Details ...	20	-0.633076	-2.04885	0	0.00265165	0.83	785	tags=60%, list=16%, signal=71%
KAYO_CALORIE_RESTRICTION_MUSCLE_UP	KAYO_CALORIE_RESTRICTION_MUSCLE_UP	Details ...	39	-0.557496	-2.04855	0	0.00264808	0.83	511	tags=36%, list=10%, signal=40%
WANG_ESOPHAGUS_CANCER_VS_NORMAL_UP	WANG_ESOPHAGUS_CANCER_VS_NORMAL_UP	Details ...	50	-0.520609	-2.04809	0	0.00264452	0.83	1111	tags=56%, list=23%, signal=72%
MODULE_234	MODULE_234	Details ...	15	-0.643444	-2.04621	0	0.00277041	0.83	861	tags=80%, list=18%, signal=97%
GOBP_INTERLEUKIN_8_PRODUCTION	GOBP_INTERLEUKIN_8_PRODUCTION	Details ...	28	-0.589344	-2.04601	0	0.00278273	0.84	558	tags=43%, list=11%, signal=48%
LAKE_ADULT_KIDNEY_C9_THIN_ASCENDING_LIMB	LAKE_ADULT_KIDNEY_C9_THIN_ASCENDING_LIMB	Details ...	104	-0.440431	-2.04578	0	0.002779	0.84	1138	tags=41%, list=23%, signal=53%
GOCC_ADHERENS_JUNCTION	GOCC_ADHERENS_JUNCTION	Details ...	61	-0.520131	-2.04572	0	0.00277529	0.84	1162	tags=54%, list=24%, signal=70%
BROWNE_HCMV_INFECTION_2HR_DN	BROWNE_HCMV_INFECTION_2HR_DN	Details ...	24	-0.611266	-2.04567	0	0.00277158	0.84	609	tags=46%, list=12%, signal=52%
HP_VASCULAR_SKIN_ABNORMALITY	HP_VASCULAR_SKIN_ABNORMALITY	Details ...	138	-0.438611	-2.04532	0	0.00276789	0.84	805	tags=35%, list=16%, signal=40%
GOBP_RESPONSE_TO_BIOTIC_STIMULUS	GOBP_RESPONSE_TO_BIOTIC_STIMULUS	Details ...	344	-0.375345	-2.0449	0	0.00281239	0.84	1097	tags=38%, list=22%, signal=45%
MODULE_19	MODULE_19	Details ...	114	-0.41937	-2.04337	0	0.0028567	0.84	998	tags=47%, list=20%, signal=58%
GSE9601_NFKB_INHIBITOR_VS_PI3K_INHIBITOR_TREATED_HCMV_INF_MONOCYTE_DN	GSE9601_NFKB_INHIBITOR_VS_PI3K_INHIBITOR_TREATED_HCMV_INF_MONOCYTE_DN	Details ...	65	-0.498804	-2.04248	0	0.0029009	0.86	785	tags=46%, list=16%, signal=54%
DESCARTES_FETAL_LIVER_STELLATE_CELLS	DESCARTES_FETAL_LIVER_STELLATE_CELLS	Details ...	38	-0.575792	-2.04198	0	0.00297662	0.86	665	tags=47%, list=14%, signal=54%
DELPUECH_FOXO3_TARGETS_UP	DELPUECH_FOXO3_TARGETS_UP	Details ...	21	-0.638247	-2.04181	0	0.0029886	0.86	543	tags=48%, list=11%, signal=53%
GSE360_L_DONOVANI_VS_M_TUBERCULOSIS_MAC_DN	GSE360_L_DONOVANI_VS_M_TUBERCULOSIS_MAC_DN	Details ...	60	-0.479948	-2.04005	0	0.00306444	0.88	1085	tags=47%, list=22%, signal=59%
LINDGREN_BLADDER_CANCER_HIGH_RECURRENCE	LINDGREN_BLADDER_CANCER_HIGH_RECURRENCE	Details ...	23	-0.602067	-2.03974	0	0.00309262	0.88	1004	tags=65%, list=21%, signal=82%
MONNIER_POSTRADIATION_TUMOR_ESCAPE_DN	MONNIER_POSTRADIATION_TUMOR_ESCAPE_DN	Details ...	118	-0.443591	-2.03952	0	0.00308854	0.88	984	tags=40%, list=20%, signal=49%
HP_VASCULAR_DILATATION	HP_VASCULAR_DILATATION	Details ...	56	-0.508378	-2.03895	0	0.00310043	0.88	847	tags=41%, list=17%, signal=49%
GSE1432_CTRL_VS_IFNG_24H_MICROGLIA_DN	GSE1432_CTRL_VS_IFNG_24H_MICROGLIA_DN	Details ...	68	-0.490555	-2.03872	0	0.00309635	0.88	823	tags=40%, list=17%, signal=47%
MODULE_146	MODULE_146	Details ...	15	-0.675652	-2.03844	0	0.00309228	0.88	267	tags=53%, list=5%, signal=56%
FAN_OVARY_CL14_MATURE_SMOOTH_MUSCLE_CELL	FAN_OVARY_CL14_MATURE_SMOOTH_MUSCLE_CELL	Details ...	130	-0.439414	-2.03827	0	0.00310393	0.88	1167	tags=51%, list=24%, signal=65%
BURTON_ADIPOGENESIS_PEAK_AT_0HR	BURTON_ADIPOGENESIS_PEAK_AT_0HR	Details ...	26	-0.605089	-2.0379	0	0.00309581	0.88	1279	tags=81%, list=26%, signal=109%
GOBP_TRANSFORMING_GROWTH_FACTOR_BETA_PRODUCTION	GOBP_TRANSFORMING_GROWTH_FACTOR_BETA_PRODUCTION	Details ...	18	-0.639847	-2.03768	0	0.00309176	0.88	792	tags=61%, list=16%, signal=73%
MODULE_220	MODULE_220	Details ...	76	-0.474864	-2.03737	0	0.00310365	0.88	740	tags=47%, list=15%, signal=55%
GSE9988_LPS_VS_VEHICLE_TREATED_MONOCYTE_UP	GSE9988_LPS_VS_VEHICLE_TREATED_MONOCYTE_UP	Details ...	43	-0.503968	-2.03714	0	0.0030996	0.88	985	tags=53%, list=20%, signal=66%
FAN_OVARY_CL1_GPRC5A_TNFRS12A_HIGH_SELECTABLE_FOLLICLE_STROMAL_CELL	FAN_OVARY_CL1_GPRC5A_TNFRS12A_HIGH_SELECTABLE_FOLLICLE_STROMAL_CELL	Details ...	152	-0.441786	-2.03681	0	0.00311134	0.88	1144	tags=39%, list=23%, signal=49%
FRIDMAN_IMMORTALIZATION_DN	FRIDMAN_IMMORTALIZATION_DN	Details ...	15	-0.700989	-2.0366	0	0.00310729	0.88	1082	tags=80%, list=22%, signal=102%
HP_ABNORMAL_PHALANGEAL_JOINT_MORPHOLOGY_OF_THE_HAND	HP_ABNORMAL_PHALANGEAL_JOINT_MORPHOLOGY_OF_THE_HAND	Details ...	57	-0.485427	-2.03657	0	0.00310326	0.88	758	tags=35%, list=16%, signal=41%
GOBP_REGULATION_OF_PEPTIDYL_SERINE_PHOSPHORYLATION	GOBP_REGULATION_OF_PEPTIDYL_SERINE_PHOSPHORYLATION	Details ...	33	-0.560523	-2.03574	0	0.00317765	0.88	1031	tags=58%, list=21%, signal=72%
WP_EBOLA_VIRUS_PATHWAY_ON_HOST	WP_EBOLA_VIRUS_PATHWAY_ON_HOST	Details ...	43	-0.55602	-2.03505	0	0.0032362	0.88	1231	tags=60%, list=25%, signal=80%
HELLER_SILENCED_BY_METHYLATION_UP	HELLER_SILENCED_BY_METHYLATION_UP	Details ...	73	-0.466151	-2.03496	0	0.00323202	0.88	487	tags=32%, list=10%, signal=34%
FAN_EMBRYONIC_CTX_BRAIN_MYELOID	FAN_EMBRYONIC_CTX_BRAIN_MYELOID	Details ...	43	-0.512119	-2.03391	0	0.00327439	0.88	881	tags=49%, list=18%, signal=59%
GSE6092_IFNG_VS_IFNG_AND_B_BURGDORFERI_INF_ENDOTHELIAL_CELL_DN	GSE6092_IFNG_VS_IFNG_AND_B_BURGDORFERI_INF_ENDOTHELIAL_CELL_DN	Details ...	39	-0.515037	-2.03363	0	0.00328577	0.88	1164	tags=49%, list=24%, signal=63%
MARCHINI_TRABECTEDIN_RESISTANCE_DN	MARCHINI_TRABECTEDIN_RESISTANCE_DN	Details ...	22	-0.597503	-2.03315	0	0.00331252	0.88	895	tags=68%, list=18%, signal=83%
GOBP_POSITIVE_CHEMOTAXIS	GOBP_POSITIVE_CHEMOTAXIS	Details ...	26	-0.552695	-2.03235	0	0.00337037	0.88	801	tags=50%, list=16%, signal=59%
GOMF_INTEGRIN_BINDING	GOMF_INTEGRIN_BINDING	Details ...	47	-0.511892	-2.03227	0	0.00336603	0.88	738	tags=45%, list=15%, signal=52%
PRC2_EZH2_UP.V1_DN	PRC2_EZH2_UP.V1_DN	Details ...	61	-0.478532	-2.03192	0	0.00336171	0.88	410	tags=26%, list=8%, signal=28%
HP_TALL_STATURE	HP_TALL_STATURE	Details ...	54	-0.481502	-2.03136	0	0.00338842	0.89	812	tags=39%, list=17%, signal=46%
REACTOME_SIGNALING_BY_MET	REACTOME_SIGNALING_BY_MET	Details ...	28	-0.585645	-2.03099	0	0.00338408	0.89	742	tags=50%, list=15%, signal=59%
GOBP_DEFENSE_RESPONSE_TO_BACTERIUM	GOBP_DEFENSE_RESPONSE_TO_BACTERIUM	Details ...	36	-0.561614	-2.03044	0	0.00341052	0.89	965	tags=58%, list=20%, signal=72%
GSE18281_CORTICAL_VS_MEDULLARY_THYMOCYTE_UP	GSE18281_CORTICAL_VS_MEDULLARY_THYMOCYTE_UP	Details ...	66	-0.477999	-2.0292	0	0.00345218	0.89	870	tags=47%, list=18%, signal=56%
GOBP_IMMUNE_EFFECTOR_PROCESS	GOBP_IMMUNE_EFFECTOR_PROCESS	Details ...	297	-0.383123	-2.02912	0	0.00344778	0.89	1183	tags=40%, list=24%, signal=50%
PETRETTO_CARDIAC_HYPERTROPHY	PETRETTO_CARDIAC_HYPERTROPHY	Details ...	20	-0.640807	-2.0291	0	0.00344338	0.89	296	tags=50%, list=6%, signal=53%
WOO_LIVER_CANCER_RECURRENCE_UP	WOO_LIVER_CANCER_RECURRENCE_UP	Details ...	40	-0.528979	-2.02748	0	0.00348488	0.89	1230	tags=68%, list=25%, signal=89%
GSE22886_NAIVE_BCELL_VS_MONOCYTE_DN	GSE22886_NAIVE_BCELL_VS_MONOCYTE_DN	Details ...	78	-0.467778	-2.02715	0	0.00348045	0.89	1485	tags=62%, list=30%, signal=87%
HP_ABNORMALITY_OF_THE_PLANTAR_SKIN_OF_FOOT	HP_ABNORMALITY_OF_THE_PLANTAR_SKIN_OF_FOOT	Details ...	21	-0.624799	-2.02714	0	0.00347603	0.89	510	tags=43%, list=10%, signal=48%
STEGER_ADIPOGENESIS_DN	STEGER_ADIPOGENESIS_DN	Details ...	17	-0.663233	-2.02577	0	0.00354786	0.89	624	tags=71%, list=13%, signal=81%
GSE2405_0H_VS_3H_A_PHAGOCYTOPHILUM_STIM_NEUTROPHIL_UP	GSE2405_0H_VS_3H_A_PHAGOCYTOPHILUM_STIM_NEUTROPHIL_UP	Details ...	72	-0.456681	-2.02575	0	0.00354337	0.89	698	tags=40%, list=14%, signal=46%
CUI_DEVELOPING_HEART_C9_B_T_CELL	CUI_DEVELOPING_HEART_C9_B_T_CELL	Details ...	37	-0.544525	-2.02512	0	0.00355414	0.89	1069	tags=59%, list=22%, signal=76%
SNF5_DN.V1_DN	SNF5_DN.V1_DN	Details ...	39	-0.548824	-2.02493	0	0.00354965	0.89	751	tags=51%, list=15%, signal=60%
GOBP_REGULATION_OF_RESPONSE_TO_EXTERNAL_STIMULUS	GOBP_REGULATION_OF_RESPONSE_TO_EXTERNAL_STIMULUS	Details ...	253	-0.397064	-2.02484	0	0.00356035	0.89	1196	tags=42%, list=24%, signal=53%
GOBP_HUMORAL_IMMUNE_RESPONSE	GOBP_HUMORAL_IMMUNE_RESPONSE	Details ...	34	-0.521421	-2.02465	0	0.00357116	0.89	388	tags=29%, list=8%, signal=32%
GSE37534_UNTREATED_VS_GW1929_TREATED_CD4_TCELL_PPARG1_AND_FOXP3_TRASDUCED_UP	GSE37534_UNTREATED_VS_GW1929_TREATED_CD4_TCELL_PPARG1_AND_FOXP3_TRASDUCED_UP	Details ...	69	-0.481005	-2.02445	0	0.00358178	0.89	1098	tags=57%, list=22%, signal=72%
OSMAN_BLOOD_CHAD63_KH_AGE_18_50YO_HIGH_DOSE_SUBJECTS_24HR_UP	OSMAN_BLOOD_CHAD63_KH_AGE_18_50YO_HIGH_DOSE_SUBJECTS_24HR_UP	Details ...	497	-0.367105	-2.02445	0	0.00357728	0.89	1611	tags=54%, list=33%, signal=72%
GOBP_RESPONSE_TO_VIRUS	GOBP_RESPONSE_TO_VIRUS	Details ...	93	-0.428125	-2.02431	0	0.00357279	0.89	1377	tags=53%, list=28%, signal=72%
GOBP_MYELOID_CELL_DEVELOPMENT	GOBP_MYELOID_CELL_DEVELOPMENT	Details ...	17	-0.612606	-2.02326	0	0.00364374	0.89	1223	tags=71%, list=25%, signal=94%
HP_ARTERIAL_STENOSIS	HP_ARTERIAL_STENOSIS	Details ...	25	-0.539632	-2.02298	0	0.00363918	0.89	1097	tags=56%, list=22%, signal=72%
WP_ALLOGRAFT_REJECTION	WP_ALLOGRAFT_REJECTION	Details ...	17	-0.629096	-2.02278	0	0.00363463	0.89	913	tags=71%, list=19%, signal=87%
KRAS.DF.V1_UP	KRAS.DF.V1_UP	Details ...	73	-0.470556	-2.02223	0	0.00364527	0.89	1339	tags=60%, list=27%, signal=82%
GSE34392_ST2_KO_VS_WT_DAY8_LCMV_EFFECTOR_CD8_TCELL_DN	GSE34392_ST2_KO_VS_WT_DAY8_LCMV_EFFECTOR_CD8_TCELL_DN	Details ...	53	-0.515208	-2.02172	0	0.00364072	0.89	1411	tags=74%, list=29%, signal=102%
BROWNE_HCMV_INFECTION_12HR_DN	BROWNE_HCMV_INFECTION_12HR_DN	Details ...	27	-0.568951	-2.02152	0	0.00363619	0.89	732	tags=44%, list=15%, signal=52%
GOBP_MUSCLE_STRUCTURE_DEVELOPMENT	GOBP_MUSCLE_STRUCTURE_DEVELOPMENT	Details ...	171	-0.400667	-2.02101	0	0.00364654	0.89	840	tags=37%, list=17%, signal=43%
RUTELLA_RESPONSE_TO_HGF_UP	RUTELLA_RESPONSE_TO_HGF_UP	Details ...	125	-0.424281	-2.02041	0	0.00367213	0.89	1196	tags=46%, list=24%, signal=59%
KIM_MYCN_AMPLIFICATION_TARGETS_DN	KIM_MYCN_AMPLIFICATION_TARGETS_DN	Details ...	37	-0.566683	-2.02008	0	0.00369742	0.89	504	tags=35%, list=10%, signal=39%
GOCC_SECRETORY_VESICLE	GOCC_SECRETORY_VESICLE	Details ...	240	-0.390769	-2.01988	0	0.00369283	0.89	967	tags=37%, list=20%, signal=43%
HERNANDEZ_ABERRANT_MITOSIS_BY_DOCETACEL_2NM_UP	HERNANDEZ_ABERRANT_MITOSIS_BY_DOCETACEL_2NM_UP	Details ...	19	-0.630707	-2.01971	0	0.00368826	0.89	1081	tags=63%, list=22%, signal=81%
GENTILE_UV_LOW_DOSE_DN	GENTILE_UV_LOW_DOSE_DN	Details ...	28	-0.603566	-2.01962	0	0.00368371	0.89	841	tags=50%, list=17%, signal=60%
GOCC_SECRETORY_GRANULE	GOCC_SECRETORY_GRANULE	Details ...	206	-0.412009	-2.01847	0	0.00373874	0.9	959	tags=37%, list=20%, signal=45%
GOBP_REGULATION_OF_CELL_SUBSTRATE_ADHESION	GOBP_REGULATION_OF_CELL_SUBSTRATE_ADHESION	Details ...	76	-0.463611	-2.01828	0	0.00376373	0.9	1167	tags=53%, list=24%, signal=68%
GOCC_CONTRACTILE_FIBER	GOCC_CONTRACTILE_FIBER	Details ...	68	-0.490059	-2.01812	0	0.00377413	0.9	1167	tags=60%, list=24%, signal=78%
GSE19888_ADENOSINE_A3R_INH_PRETREAT_AND_ACT_BY_A3R_VS_TCELL_MEMBRANES_ACT_MAST_CELL_UP	GSE19888_ADENOSINE_A3R_INH_PRETREAT_AND_ACT_BY_A3R_VS_TCELL_MEMBRANES_ACT_MAST_CELL_UP	Details ...	64	-0.475115	-2.01774	0	0.00379905	0.9	1082	tags=55%, list=22%, signal=69%
HP_CHEST_PAIN	HP_CHEST_PAIN	Details ...	28	-0.599638	-2.01723	0	0.00380901	0.9	763	tags=50%, list=16%, signal=59%
GOBP_EPIDERMIS_DEVELOPMENT	GOBP_EPIDERMIS_DEVELOPMENT	Details ...	79	-0.458521	-2.01558	0	0.00383402	0.91	768	tags=39%, list=16%, signal=46%
HAHTOLA_MYCOSIS_FUNGOIDES_CD4_UP	HAHTOLA_MYCOSIS_FUNGOIDES_CD4_UP	Details ...	18	-0.633914	-2.01494	0	0.00387363	0.91	864	tags=67%, list=18%, signal=81%
SAGIV_CD24_TARGETS_DN	SAGIV_CD24_TARGETS_DN	Details ...	19	-0.637895	-2.01451	0	0.00388359	0.92	808	tags=58%, list=17%, signal=69%
HP_ABNORMAL_MITRAL_VALVE_PHYSIOLOGY	HP_ABNORMAL_MITRAL_VALVE_PHYSIOLOGY	Details ...	43	-0.539317	-2.01434	0	0.00389351	0.92	429	tags=35%, list=9%, signal=38%
CHANG_IMMORTALIZED_BY_HPV31_DN	CHANG_IMMORTALIZED_BY_HPV31_DN	Details ...	22	-0.574662	-2.01427	0	0.00390347	0.92	478	tags=41%, list=10%, signal=45%
DURAND_STROMA_S_UP	DURAND_STROMA_S_UP	Details ...	89	-0.456857	-2.01252	0	0.00394269	0.92	793	tags=43%, list=16%, signal=50%
ALTEMEIER_RESPONSE_TO_LPS_WITH_MECHANICAL_VENTILATION	ALTEMEIER_RESPONSE_TO_LPS_WITH_MECHANICAL_VENTILATION	Details ...	32	-0.57169	-2.01251	0	0.00393789	0.92	1439	tags=78%, list=29%, signal=110%
ELF1_Q6	ELF1_Q6	Details ...	53	-0.476354	-2.01246	0	0.0039331	0.92	1282	tags=55%, list=26%, signal=73%
GSE360_LOW_DOSE_B_MALAYI_VS_M_TUBERCULOSIS_DC_DN	GSE360_LOW_DOSE_B_MALAYI_VS_M_TUBERCULOSIS_DC_DN	Details ...	57	-0.472848	-2.01192	0	0.00394297	0.92	1358	tags=58%, list=28%, signal=79%
LINDGREN_BLADDER_CANCER_CLUSTER_2A_DN	LINDGREN_BLADDER_CANCER_CLUSTER_2A_DN	Details ...	41	-0.505804	-2.01186	0	0.00393819	0.92	1242	tags=59%, list=25%, signal=78%
GOBP_REGULATION_OF_ACTOMYOSIN_STRUCTURE_ORGANIZATION	GOBP_REGULATION_OF_ACTOMYOSIN_STRUCTURE_ORGANIZATION	Details ...	26	-0.537865	-2.01112	0	0.00394803	0.92	1312	tags=58%, list=27%, signal=78%
HP_ABNORMAL_BLEEDING	HP_ABNORMAL_BLEEDING	Details ...	127	-0.430989	-2.01109	0	0.00394325	0.92	784	tags=34%, list=16%, signal=39%
WP_FOCAL_ADHESIONPI3KAKTMTORSIGNALING_PATHWAY	WP_FOCAL_ADHESIONPI3KAKTMTORSIGNALING_PATHWAY	Details ...	87	-0.45159	-2.01107	0	0.00395308	0.92	845	tags=40%, list=17%, signal=48%
LAKE_ADULT_KIDNEY_C28_INTERSTITIUM	LAKE_ADULT_KIDNEY_C28_INTERSTITIUM	Details ...	27	-0.577809	-2.01075	0	0.0039483	0.92	1421	tags=70%, list=29%, signal=99%
AREB6_04	AREB6_04	Details ...	75	-0.454918	-2.01023	0	0.00395814	0.92	418	tags=28%, list=9%, signal=30%
FAN_OVARY_CL17_PUTATIVE_APOPTOTIC_SMOOTH_MUSCLE_CELL	FAN_OVARY_CL17_PUTATIVE_APOPTOTIC_SMOOTH_MUSCLE_CELL	Details ...	106	-0.440627	-2.00977	0	0.00399716	0.92	1160	tags=48%, list=24%, signal=62%
SARRIO_EPITHELIAL_MESENCHYMAL_TRANSITION_DN	SARRIO_EPITHELIAL_MESENCHYMAL_TRANSITION_DN	Details ...	45	-0.480155	-2.0091	0	0.00400686	0.92	499	tags=33%, list=10%, signal=37%
HALLMARK_COMPLEMENT	HALLMARK_COMPLEMENT	Details ...	56	-0.481474	-2.00908	0	0.00400205	0.92	890	tags=52%, list=18%, signal=63%
GOBP_POSITIVE_REGULATION_OF_RESPONSE_TO_EXTERNAL_STIMULUS	GOBP_POSITIVE_REGULATION_OF_RESPONSE_TO_EXTERNAL_STIMULUS	Details ...	133	-0.423907	-2.00817	0	0.00405511	0.92	1167	tags=42%, list=24%, signal=54%
GOMF_SIGNALING_RECEPTOR_BINDING	GOMF_SIGNALING_RECEPTOR_BINDING	Details ...	363	-0.381776	-2.00741	0	0.00409389	0.92	902	tags=37%, list=18%, signal=42%
CHEN_LVAD_SUPPORT_OF_FAILING_HEART_UP	CHEN_LVAD_SUPPORT_OF_FAILING_HEART_UP	Details ...	42	-0.515795	-2.00697	0	0.00410343	0.92	951	tags=52%, list=19%, signal=64%
GSE7768_OVA_WITH_LPS_VS_OVA_WITH_MPL_IMMUNIZED_MOUSE_WHOLE_SPLEEN_6H_DN	GSE7768_OVA_WITH_LPS_VS_OVA_WITH_MPL_IMMUNIZED_MOUSE_WHOLE_SPLEEN_6H_DN	Details ...	52	-0.503115	-2.0069	0	0.00409852	0.92	1172	tags=52%, list=24%, signal=68%
CAHOY_ASTROGLIAL	CAHOY_ASTROGLIAL	Details ...	36	-0.57561	-2.00685	0	0.00409363	0.92	801	tags=58%, list=16%, signal=69%
GSE5542_UNTREATED_VS_IFNA_TREATED_EPITHELIAL_CELLS_24H_UP	GSE5542_UNTREATED_VS_IFNA_TREATED_EPITHELIAL_CELLS_24H_UP	Details ...	72	-0.475886	-2.00464	0	0.00419915	0.93	1454	tags=61%, list=30%, signal=86%
GSE3982_NEUTROPHIL_VS_CENT_MEMORY_CD4_TCELL_UP	GSE3982_NEUTROPHIL_VS_CENT_MEMORY_CD4_TCELL_UP	Details ...	62	-0.486197	-2.00371	0	0.00423225	0.93	1514	tags=65%, list=31%, signal=92%
GSE23502_BM_VS_COLON_TUMOR_MYELOID_DERIVED_SUPPRESSOR_CELL_UP	GSE23502_BM_VS_COLON_TUMOR_MYELOID_DERIVED_SUPPRESSOR_CELL_UP	Details ...	60	-0.491737	-2.00312	0	0.00428438	0.94	1019	tags=53%, list=21%, signal=67%
RB_P107_DN.V1_UP	RB_P107_DN.V1_UP	Details ...	53	-0.466235	-2.00215	0	0.00435074	0.95	401	tags=25%, list=8%, signal=26%
GSE36888_UNTREATED_VS_IL2_TREATED_STAT5_AB_KNOCKIN_TCELL_2H_UP	GSE36888_UNTREATED_VS_IL2_TREATED_STAT5_AB_KNOCKIN_TCELL_2H_UP	Details ...	71	-0.467976	-2.00201	0	0.00434559	0.95	1346	tags=59%, list=28%, signal=80%
QUEREC_PBMC_YF_17D_VACCINE_AGE_18_45YO_3DY_UP	QUEREC_PBMC_YF_17D_VACCINE_AGE_18_45YO_3DY_UP	Details ...	21	-0.578947	-2.00168	0	0.00434045	0.95	1082	tags=62%, list=22%, signal=79%
SATO_SILENCED_BY_METHYLATION_IN_PANCREATIC_CANCER_1	SATO_SILENCED_BY_METHYLATION_IN_PANCREATIC_CANCER_1	Details ...	109	-0.429483	-2.00083	0	0.00440665	0.95	831	tags=44%, list=17%, signal=52%
KIM_WT1_TARGETS_8HR_UP	KIM_WT1_TARGETS_8HR_UP	Details ...	71	-0.459234	-2.00051	0	0.00440144	0.95	976	tags=44%, list=20%, signal=54%
PDGF_UP.V1_DN	PDGF_UP.V1_DN	Details ...	21	-0.603895	-2.00048	0	0.00439625	0.95	788	tags=52%, list=16%, signal=62%
FAN_OVARY_CL13_MONOCYTE_MACROPHAGE	FAN_OVARY_CL13_MONOCYTE_MACROPHAGE	Details ...	142	-0.427296	-2.00035	0	0.00439108	0.95	1694	tags=65%, list=35%, signal=96%
GOBP_POSITIVE_REGULATION_OF_ENDOTHELIAL_CELL_PROLIFERATION	GOBP_POSITIVE_REGULATION_OF_ENDOTHELIAL_CELL_PROLIFERATION	Details ...	32	-0.551997	-2.00008	0	0.0044001	0.95	1105	tags=59%, list=23%, signal=76%
BROWNE_INTERFERON_RESPONSIVE_GENES	BROWNE_INTERFERON_RESPONSIVE_GENES	Details ...	21	-0.592626	-2.00001	0	0.00439493	0.95	1321	tags=76%, list=27%, signal=104%
HP_HIGH_NARROW_PALATE	HP_HIGH_NARROW_PALATE	Details ...	36	-0.535953	-1.99958	0	0.00440374	0.95	651	tags=36%, list=13%, signal=41%
GOBP_POSITIVE_REGULATION_OF_SMOOTH_MUSCLE_CELL_PROLIFERATION	GOBP_POSITIVE_REGULATION_OF_SMOOTH_MUSCLE_CELL_PROLIFERATION	Details ...	32	-0.531515	-1.99956	0	0.00439858	0.95	631	tags=44%, list=13%, signal=50%
KEGG_CYTOKINE_CYTOKINE_RECEPTOR_INTERACTION	KEGG_CYTOKINE_CYTOKINE_RECEPTOR_INTERACTION	Details ...	55	-0.479019	-1.99863	0	0.00440767	0.96	917	tags=49%, list=19%, signal=60%
MODULE_199	MODULE_199	Details ...	17	-0.639261	-1.99853	0	0.00441651	0.96	787	tags=65%, list=16%, signal=77%
GSE360_L_DONOVANI_VS_B_MALAYI_LOW_DOSE_MAC_UP	GSE360_L_DONOVANI_VS_B_MALAYI_LOW_DOSE_MAC_UP	Details ...	55	-0.482488	-1.99852	0	0.00441135	0.96	1147	tags=55%, list=23%, signal=70%
HP_CONTRACTURES_OF_THE_JOINTS_OF_THE_LOWER_LIMBS	HP_CONTRACTURES_OF_THE_JOINTS_OF_THE_LOWER_LIMBS	Details ...	39	-0.471478	-1.9985	0	0.00440621	0.96	925	tags=44%, list=19%, signal=53%
GSE9988_LOW_LPS_VS_CTRL_TREATED_MONOCYTE_UP	GSE9988_LOW_LPS_VS_CTRL_TREATED_MONOCYTE_UP	Details ...	45	-0.562169	-1.99641	0	0.00447118	0.96	861	tags=58%, list=18%, signal=69%
GSE21927_SPLENIC_C26GM_TUMOROUS_VS_BONE_MARROW_MONOCYTES_UP	GSE21927_SPLENIC_C26GM_TUMOROUS_VS_BONE_MARROW_MONOCYTES_UP	Details ...	31	-0.574547	-1.99634	0	0.00446598	0.96	1206	tags=71%, list=25%, signal=94%
MODULE_176	MODULE_176	Details ...	50	-0.507404	-1.99564	0	0.00447486	0.96	419	tags=40%, list=9%, signal=43%
GOCC_ACTIN_CYTOSKELETON	GOCC_ACTIN_CYTOSKELETON	Details ...	162	-0.405227	-1.99472	0	0.00451162	0.96	1231	tags=52%, list=25%, signal=68%
FAN_OVARY_CL7_ANGEIOGENIC_ENDOTHELIAL_CELL	FAN_OVARY_CL7_ANGEIOGENIC_ENDOTHELIAL_CELL	Details ...	98	-0.430054	-1.99424	0	0.0045343	0.96	1280	tags=57%, list=26%, signal=76%
GSE6259_CD4_TCELL_VS_CD8_TCELL_DN	GSE6259_CD4_TCELL_VS_CD8_TCELL_DN	Details ...	53	-0.502119	-1.99415	0	0.00452905	0.96	1358	tags=62%, list=28%, signal=85%
HP_LONG_FINGERS	HP_LONG_FINGERS	Details ...	64	-0.478282	-1.99294	0	0.00457976	0.96	889	tags=41%, list=18%, signal=49%
SRC_UP.V1_DN	SRC_UP.V1_DN	Details ...	48	-0.500957	-1.99276	0	0.0045884	0.96	469	tags=29%, list=10%, signal=32%
FLECHNER_BIOPSY_KIDNEY_TRANSPLANT_OK_VS_DONOR_UP	FLECHNER_BIOPSY_KIDNEY_TRANSPLANT_OK_VS_DONOR_UP	Details ...	175	-0.406348	-1.99268	0	0.0045831	0.96	1339	tags=44%, list=27%, signal=58%
SENESE_HDAC2_TARGETS_UP	SENESE_HDAC2_TARGETS_UP	Details ...	39	-0.499375	-1.99266	0	0.00457781	0.96	1344	tags=54%, list=28%, signal=74%
GOBP_LEUKOCYTE_MIGRATION	GOBP_LEUKOCYTE_MIGRATION	Details ...	116	-0.424148	-1.99244	0	0.00458648	0.96	665	tags=34%, list=14%, signal=39%
MILI_PSEUDOPODIA_CHEMOTAXIS_DN	MILI_PSEUDOPODIA_CHEMOTAXIS_DN	Details ...	156	-0.414294	-1.99181	0	0.00459506	0.96	1376	tags=49%, list=28%, signal=66%
ATATGCA_MIR448	ATATGCA_MIR448	Details ...	73	-0.462579	-1.99146	0	0.00460346	0.96	1457	tags=62%, list=30%, signal=87%
GSE3039_ALPHAALPHA_VS_ALPHABETA_CD8_TCELL_UP	GSE3039_ALPHAALPHA_VS_ALPHABETA_CD8_TCELL_UP	Details ...	63	-0.479976	-1.99085	0	0.00465347	0.96	868	tags=41%, list=18%, signal=50%
GSE29618_PDC_VS_MDC_DN	GSE29618_PDC_VS_MDC_DN	Details ...	64	-0.475048	-1.99076	0	0.00466196	0.96	1466	tags=69%, list=30%, signal=97%
GSE2585_CD80_HIGH_VS_LOW_AIRE_KO_MTEC_UP	GSE2585_CD80_HIGH_VS_LOW_AIRE_KO_MTEC_UP	Details ...	41	-0.5433	-1.9907	0	0.00465662	0.96	549	tags=39%, list=11%, signal=44%
TSENG_ADIPOGENIC_POTENTIAL_DN	TSENG_ADIPOGENIC_POTENTIAL_DN	Details ...	16	-0.63344	-1.98997	0	0.00467887	0.96	787	tags=63%, list=16%, signal=74%
GSE3982_BASOPHIL_VS_EFF_MEMORY_CD4_TCELL_UP	GSE3982_BASOPHIL_VS_EFF_MEMORY_CD4_TCELL_UP	Details ...	53	-0.484158	-1.98926	0	0.0047422	0.97	1700	tags=74%, list=35%, signal=112%
GOBP_HEART_DEVELOPMENT	GOBP_HEART_DEVELOPMENT	Details ...	149	-0.418867	-1.98922	0	0.00473678	0.97	809	tags=38%, list=17%, signal=44%
GNF2_HLA_C	GNF2_HLA_C	Details ...	16	-0.657996	-1.98912	0	0.00473138	0.97	951	tags=75%, list=19%, signal=93%
HES2_TARGET_GENES	HES2_TARGET_GENES	Details ...	338	-0.361806	-1.98911	0	0.00472599	0.97	1019	tags=33%, list=21%, signal=39%
GSE7852_THYMUS_VS_FAT_TREG_DN	GSE7852_THYMUS_VS_FAT_TREG_DN	Details ...	51	-0.454235	-1.9891	0	0.00472062	0.97	1312	tags=59%, list=27%, signal=80%
HP_INCREASED_BLOOD_PRESSURE	HP_INCREASED_BLOOD_PRESSURE	Details ...	92	-0.459162	-1.98853	0	0.0047513	0.97	917	tags=38%, list=19%, signal=46%
GSE3982_MAST_CELL_VS_TH2_UP	GSE3982_MAST_CELL_VS_TH2_UP	Details ...	58	-0.502876	-1.98823	0	0.00477309	0.97	871	tags=43%, list=18%, signal=52%
MEK_UP.V1_UP	MEK_UP.V1_UP	Details ...	74	-0.453694	-1.98812	0	0.00476768	0.97	847	tags=46%, list=17%, signal=55%
PATEL_SKIN_OF_BODY_ZOSTAVAX_AGE_70_93YO_VZV_CHALLENGE_3DY_UP	PATEL_SKIN_OF_BODY_ZOSTAVAX_AGE_70_93YO_VZV_CHALLENGE_3DY_UP	Details ...	28	-0.576591	-1.98564	0	0.0048251	0.98	1111	tags=61%, list=23%, signal=78%
RADMACHER_AML_PROGNOSIS	RADMACHER_AML_PROGNOSIS	Details ...	29	-0.584707	-1.98521	0	0.00486038	0.98	964	tags=59%, list=20%, signal=73%
WP_VEGFAVEGFR2_SIGNALING_PATHWAY	WP_VEGFAVEGFR2_SIGNALING_PATHWAY	Details ...	141	-0.409229	-1.9852	0	0.0048549	0.98	1009	tags=38%, list=21%, signal=46%
LEE_LIVER_CANCER_E2F1_UP	LEE_LIVER_CANCER_E2F1_UP	Details ...	23	-0.602925	-1.98443	0	0.00489015	0.98	1138	tags=70%, list=23%, signal=90%
REACTOME_KERATINIZATION	REACTOME_KERATINIZATION	Details ...	15	-0.637299	-1.98429	0	0.00488465	0.98	768	tags=53%, list=16%, signal=63%
DACOSTA_UV_RESPONSE_VIA_ERCC3_COMMON_DN	DACOSTA_UV_RESPONSE_VIA_ERCC3_COMMON_DN	Details ...	131	-0.416761	-1.98392	0	0.00490634	0.98	1150	tags=42%, list=24%, signal=53%
GOBP_PROTEIN_PROCESSING	GOBP_PROTEIN_PROCESSING	Details ...	57	-0.473909	-1.98375	0	0.00492781	0.98	768	tags=42%, list=16%, signal=49%
HP_ABNORMAL_CARDIOVASCULAR_SYSTEM_PHYSIOLOGY	HP_ABNORMAL_CARDIOVASCULAR_SYSTEM_PHYSIOLOGY	Details ...	302	-0.368321	-1.98371	0	0.00492228	0.98	851	tags=30%, list=17%, signal=34%
GSE3565_CTRL_VS_LPS_INJECTED_DUSP1_KO_SPLENOCYTES_UP	GSE3565_CTRL_VS_LPS_INJECTED_DUSP1_KO_SPLENOCYTES_UP	Details ...	53	-0.479549	-1.9833	0	0.00493038	0.98	890	tags=55%, list=18%, signal=66%
GOBP_POSITIVE_REGULATION_OF_PHOSPHORUS_METABOLIC_PROCESS	GOBP_POSITIVE_REGULATION_OF_PHOSPHORUS_METABOLIC_PROCESS	Details ...	239	-0.390382	-1.98313	0	0.00493836	0.98	1034	tags=39%, list=21%, signal=47%
HOWARD_MONOCYTE_INACT_MONOV_INFLUENZA_A_INDONESIA_05_2005_H5N1_AGE_18_49YO_1DY_UP	HOWARD_MONOCYTE_INACT_MONOV_INFLUENZA_A_INDONESIA_05_2005_H5N1_AGE_18_49YO_1DY_UP	Details ...	65	-0.49442	-1.98221	0	0.00494634	0.98	673	tags=40%, list=14%, signal=46%
GSE2706_UNSTIM_VS_8H_LPS_AND_R848_DC_DN	GSE2706_UNSTIM_VS_8H_LPS_AND_R848_DC_DN	Details ...	52	-0.487662	-1.982	0	0.00494082	0.98	1183	tags=54%, list=24%, signal=70%
PEDERSEN_METASTASIS_BY_ERBB2_ISOFORM_7	PEDERSEN_METASTASIS_BY_ERBB2_ISOFORM_7	Details ...	144	-0.399406	-1.98196	0	0.00493532	0.98	861	tags=35%, list=18%, signal=42%
REACTOME_COLLAGEN_BIOSYNTHESIS_AND_MODIFYING_ENZYMES	REACTOME_COLLAGEN_BIOSYNTHESIS_AND_MODIFYING_ENZYMES	Details ...	25	-0.586424	-1.98178	0	0.00492982	0.98	374	tags=52%, list=8%, signal=56%
GSE25123_WT_VS_PPARG_KO_MACROPHAGE_UP	GSE25123_WT_VS_PPARG_KO_MACROPHAGE_UP	Details ...	50	-0.486488	-1.98159	0	0.00492434	0.98	1357	tags=62%, list=28%, signal=85%
HP_ABNORMAL_ATRIOVENTRICULAR_VALVE_PHYSIOLOGY	HP_ABNORMAL_ATRIOVENTRICULAR_VALVE_PHYSIOLOGY	Details ...	50	-0.49091	-1.98112	0	0.00497221	0.98	429	tags=30%, list=9%, signal=33%
GSE9988_ANTI_TREM1_AND_LPS_VS_CTRL_TREATED_MONOCYTES_UP	GSE9988_ANTI_TREM1_AND_LPS_VS_CTRL_TREATED_MONOCYTES_UP	Details ...	57	-0.511926	-1.98107	0	0.00496669	0.98	861	tags=47%, list=18%, signal=57%
HP_ABNORMAL_AORTIC_VALVE_CUSP_MORPHOLOGY	HP_ABNORMAL_AORTIC_VALVE_CUSP_MORPHOLOGY	Details ...	31	-0.521764	-1.98045	0	0.00500132	0.98	648	tags=35%, list=13%, signal=41%
GOBP_MYELOID_LEUKOCYTE_MIGRATION	GOBP_MYELOID_LEUKOCYTE_MIGRATION	Details ...	56	-0.475009	-1.97933	0	0.00506272	0.98	817	tags=39%, list=17%, signal=47%
GENTILE_UV_HIGH_DOSE_DN	GENTILE_UV_HIGH_DOSE_DN	Details ...	86	-0.425775	-1.97916	0	0.00505712	0.98	951	tags=35%, list=19%, signal=43%
GOBP_REGULATION_OF_CELL_MATRIX_ADHESION	GOBP_REGULATION_OF_CELL_MATRIX_ADHESION	Details ...	47	-0.463287	-1.97901	0	0.00506479	0.98	1403	tags=62%, list=29%, signal=86%
GSE24671_CTRL_VS_BAKIMULC_INFECTED_MOUSE_SPLENOCYTES_DN	GSE24671_CTRL_VS_BAKIMULC_INFECTED_MOUSE_SPLENOCYTES_DN	Details ...	47	-0.528382	-1.97894	0	0.0050592	0.98	751	tags=45%, list=15%, signal=52%
GOBP_CELL_CELL_JUNCTION_ORGANIZATION	GOBP_CELL_CELL_JUNCTION_ORGANIZATION	Details ...	62	-0.452277	-1.97804	0	0.0051201	0.98	1167	tags=50%, list=24%, signal=65%
PID_HIF1_TFPATHWAY	PID_HIF1_TFPATHWAY	Details ...	24	-0.591947	-1.9779	0	0.00511446	0.98	845	tags=58%, list=17%, signal=70%
GSE9988_ANTI_TREM1_VS_VEHICLE_TREATED_MONOCYTES_UP	GSE9988_ANTI_TREM1_VS_VEHICLE_TREATED_MONOCYTES_UP	Details ...	73	-0.452295	-1.97772	0	0.00510884	0.98	1157	tags=51%, list=24%, signal=65%
GSE7852_TREG_VS_TCONV_THYMUS_UP	GSE7852_TREG_VS_TCONV_THYMUS_UP	Details ...	62	-0.455173	-1.97762	0	0.00511643	0.98	873	tags=50%, list=18%, signal=60%
ZHOU_INFLAMMATORY_RESPONSE_LIVE_UP	ZHOU_INFLAMMATORY_RESPONSE_LIVE_UP	Details ...	126	-0.414858	-1.97697	0	0.00516385	0.98	1132	tags=50%, list=23%, signal=63%
FURUKAWA_DUSP6_TARGETS_PCI35_UP	FURUKAWA_DUSP6_TARGETS_PCI35_UP	Details ...	21	-0.562878	-1.9764	0	0.00521118	0.99	847	tags=57%, list=17%, signal=69%
GSE26495_NAIVE_VS_PD1LOW_CD8_TCELL_DN	GSE26495_NAIVE_VS_PD1LOW_CD8_TCELL_DN	Details ...	73	-0.441963	-1.97592	0	0.00524511	0.99	1029	tags=49%, list=21%, signal=62%
LAKE_ADULT_KIDNEY_C8_DECENDING_THIN_LIMB	LAKE_ADULT_KIDNEY_C8_DECENDING_THIN_LIMB	Details ...	109	-0.437496	-1.9759	0	0.00523937	0.99	1231	tags=42%, list=25%, signal=55%
MODULE_292	MODULE_292	Details ...	25	-0.563673	-1.97571	0	0.00524678	0.99	1052	tags=68%, list=22%, signal=86%
GSE21360_PRIMARY_VS_TERTIARY_MEMORY_CD8_TCELL_DN	GSE21360_PRIMARY_VS_TERTIARY_MEMORY_CD8_TCELL_DN	Details ...	65	-0.475902	-1.97558	0	0.00525425	0.99	1358	tags=57%, list=28%, signal=78%
RPS14_DN.V1_UP	RPS14_DN.V1_UP	Details ...	47	-0.52974	-1.97544	0	0.00526928	0.99	873	tags=55%, list=18%, signal=67%
GSE5679_CTRL_VS_PPARG_LIGAND_ROSIGLITAZONE_AND_RARA_AGONIST_AM580_TREATED_DC_DN	GSE5679_CTRL_VS_PPARG_LIGAND_ROSIGLITAZONE_AND_RARA_AGONIST_AM580_TREATED_DC_DN	Details ...	68	-0.475934	-1.97541	0	0.00526354	0.99	982	tags=46%, list=20%, signal=56%
BUSSLINGER_GASTRIC_MATURE_PIT_CELLS	BUSSLINGER_GASTRIC_MATURE_PIT_CELLS	Details ...	75	-0.45923	-1.97498	0	0.00529711	0.99	1151	tags=56%, list=24%, signal=72%
MODULE_33	MODULE_33	Details ...	99	-0.419434	-1.97403	0	0.00534362	0.99	785	tags=39%, list=16%, signal=46%
HINATA_NFKB_TARGETS_KERATINOCYTE_UP	HINATA_NFKB_TARGETS_KERATINOCYTE_UP	Details ...	34	-0.513643	-1.97303	0	0.00539748	0.99	881	tags=56%, list=18%, signal=68%
JOHNSTONE_PARVB_TARGETS_1_DN	JOHNSTONE_PARVB_TARGETS_1_DN	Details ...	23	-0.577996	-1.973	0	0.00540472	0.99	800	tags=52%, list=16%, signal=62%
GOBP_CARDIAC_CHAMBER_DEVELOPMENT	GOBP_CARDIAC_CHAMBER_DEVELOPMENT	Details ...	41	-0.483032	-1.97284	0	0.00541203	0.99	809	tags=49%, list=17%, signal=58%
GSE34515_CD16_POS_MONOCYTE_VS_DC_DN	GSE34515_CD16_POS_MONOCYTE_VS_DC_DN	Details ...	53	-0.466976	-1.97231	0	0.00545839	0.99	1032	tags=45%, list=21%, signal=57%
FULCHER_INFLAMMATORY_RESPONSE_LECTIN_VS_LPS_DN	FULCHER_INFLAMMATORY_RESPONSE_LECTIN_VS_LPS_DN	Details ...	131	-0.431118	-1.97201	0	0.00549137	0.99	1085	tags=45%, list=22%, signal=56%
PODAR_RESPONSE_TO_ADAPHOSTIN_UP	PODAR_RESPONSE_TO_ADAPHOSTIN_UP	Details ...	53	-0.49045	-1.9718	0	0.00549842	0.99	1695	tags=75%, list=35%, signal=114%
GSE22140_GERMFREE_VS_SPF_ARTHRITIC_MOUSE_CD4_TCELL_UP	GSE22140_GERMFREE_VS_SPF_ARTHRITIC_MOUSE_CD4_TCELL_UP	Details ...	75	-0.478376	-1.97161	0	0.00551847	0.99	1296	tags=57%, list=27%, signal=77%
TATAAA_TATA_01	TATAAA_TATA_01	Details ...	296	-0.364202	-1.97131	0	0.00552554	0.99	876	tags=35%, list=18%, signal=40%
MODULE_172	MODULE_172	Details ...	24	-0.580809	-1.97083	0	0.00554553	0.99	629	tags=50%, list=13%, signal=57%
MODULE_171	MODULE_171	Details ...	29	-0.562181	-1.97043	0	0.00557844	0.99	1052	tags=66%, list=22%, signal=83%
HP_ARTERIOSCLEROSIS	HP_ARTERIOSCLEROSIS	Details ...	21	-0.593925	-1.97037	0	0.00557246	0.99	982	tags=57%, list=20%, signal=71%
CUI_TCF21_TARGETS_UP	CUI_TCF21_TARGETS_UP	Details ...	17	-0.666416	-1.96948	0	0.00563079	0.99	292	tags=41%, list=6%, signal=44%
GSE15330_HSC_VS_MEGAKARYOCYTE_ERYTHROID_PROGENITOR_IKAROS_KO_DN	GSE15330_HSC_VS_MEGAKARYOCYTE_ERYTHROID_PROGENITOR_IKAROS_KO_DN	Details ...	46	-0.476416	-1.96933	0	0.00562477	0.99	769	tags=41%, list=16%, signal=49%
HOWARD_NEUTROPHIL_INACT_MONOV_INFLUENZA_A_INDONESIA_05_2005_H5N1_AGE_18_49YO_1DY_UP	HOWARD_NEUTROPHIL_INACT_MONOV_INFLUENZA_A_INDONESIA_05_2005_H5N1_AGE_18_49YO_1DY_UP	Details ...	98	-0.419339	-1.96804	0	0.00573467	0.99	1388	tags=55%, list=28%, signal=75%
GSE37301_CD4_TCELL_VS_RAG2_KO_NK_CELL_DN	GSE37301_CD4_TCELL_VS_RAG2_KO_NK_CELL_DN	Details ...	53	-0.480258	-1.96779	0	0.00572855	0.99	1482	tags=70%, list=30%, signal=99%
GSE17721_PAM3CSK4_VS_GADIQUIMOD_1H_BMDC_UP	GSE17721_PAM3CSK4_VS_GADIQUIMOD_1H_BMDC_UP	Details ...	52	-0.497855	-1.96759	0	0.00574816	0.99	814	tags=44%, list=17%, signal=53%
MODULE_259	MODULE_259	Details ...	16	-0.655913	-1.96676	0	0.00575487	0.99	787	tags=69%, list=16%, signal=82%
HP_ABNORMAL_SPUTUM	HP_ABNORMAL_SPUTUM	Details ...	27	-0.506314	-1.96672	0	0.00574875	0.99	652	tags=48%, list=13%, signal=55%
NGUYEN_NOTCH1_TARGETS_DN	NGUYEN_NOTCH1_TARGETS_DN	Details ...	33	-0.511178	-1.96642	0	0.00575546	0.99	1535	tags=67%, list=31%, signal=97%
GOBP_MORPHOGENESIS_OF_A_BRANCHING_STRUCTURE	GOBP_MORPHOGENESIS_OF_A_BRANCHING_STRUCTURE	Details ...	60	-0.471192	-1.9662	0	0.00580061	0.99	631	tags=35%, list=13%, signal=40%
GOBP_POSITIVE_REGULATION_OF_WOUND_HEALING	GOBP_POSITIVE_REGULATION_OF_WOUND_HEALING	Details ...	16	-0.619597	-1.96575	0	0.00581998	0.99	655	tags=56%, list=13%, signal=65%
KIM_WT1_TARGETS_12HR_DN	KIM_WT1_TARGETS_12HR_DN	Details ...	87	-0.455709	-1.96495	0	0.00587772	0.99	876	tags=34%, list=18%, signal=41%
GOBP_NEGATIVE_REGULATION_OF_RESPONSE_TO_EXTERNAL_STIMULUS	GOBP_NEGATIVE_REGULATION_OF_RESPONSE_TO_EXTERNAL_STIMULUS	Details ...	92	-0.427788	-1.96484	0	0.0058715	0.99	996	tags=40%, list=20%, signal=50%
GSE36888_UNTREATED_VS_IL2_TREATED_STAT5_AB_KNOCKIN_TCELL_17H_UP	GSE36888_UNTREATED_VS_IL2_TREATED_STAT5_AB_KNOCKIN_TCELL_17H_UP	Details ...	52	-0.481094	-1.96481	0	0.00586529	0.99	1195	tags=54%, list=24%, signal=71%
DURANTE_ADULT_OLFACTORY_NEUROEPITHELIUM_PERICYTES	DURANTE_ADULT_OLFACTORY_NEUROEPITHELIUM_PERICYTES	Details ...	20	-0.600439	-1.96473	0	0.0058591	0.99	956	tags=70%, list=20%, signal=87%
CSR_EARLY_UP.V1_DN	CSR_EARLY_UP.V1_DN	Details ...	33	-0.534027	-1.96435	0	0.00587839	0.99	1032	tags=52%, list=21%, signal=65%
MODULE_433	MODULE_433	Details ...	18	-0.64255	-1.96425	0	0.00587219	0.99	648	tags=67%, list=13%, signal=77%
GOBP_KERATINIZATION	GOBP_KERATINIZATION	Details ...	17	-0.629691	-1.96405	0	0.00587866	0.99	768	tags=53%, list=16%, signal=63%
GOBP_REGULATION_OF_PROTEIN_LOCALIZATION_TO_PLASMA_MEMBRANE	GOBP_REGULATION_OF_PROTEIN_LOCALIZATION_TO_PLASMA_MEMBRANE	Details ...	41	-0.50906	-1.96287	0	0.00594841	0.99	1219	tags=54%, list=25%, signal=71%
GSE2706_UNSTIM_VS_8H_R848_DC_DN	GSE2706_UNSTIM_VS_8H_R848_DC_DN	Details ...	57	-0.478696	-1.96257	0	0.00598011	0.99	814	tags=44%, list=17%, signal=52%
WIERENGA_STAT5A_TARGETS_UP	WIERENGA_STAT5A_TARGETS_UP	Details ...	67	-0.482272	-1.96251	0	0.0059866	0.99	870	tags=54%, list=18%, signal=64%
KANG_IMMORTALIZED_BY_TERT_UP	KANG_IMMORTALIZED_BY_TERT_UP	Details ...	36	-0.525131	-1.96206	0	0.00599305	0.99	814	tags=47%, list=17%, signal=56%
GOBP_MULTI_MULTICELLULAR_ORGANISM_PROCESS	GOBP_MULTI_MULTICELLULAR_ORGANISM_PROCESS	Details ...	61	-0.463404	-1.96158	0	0.00599936	0.99	698	tags=39%, list=14%, signal=45%
KAN_RESPONSE_TO_ARSENIC_TRIOXIDE	KAN_RESPONSE_TO_ARSENIC_TRIOXIDE	Details ...	53	-0.488349	-1.96054	0	0.00603736	0.99	954	tags=57%, list=20%, signal=70%
FAN_OVARY_CL5_HEALTHY_SELECTABLE_FOLLICLE_THECAL_CELL	FAN_OVARY_CL5_HEALTHY_SELECTABLE_FOLLICLE_THECAL_CELL	Details ...	115	-0.426415	-1.96018	0	0.00605629	0.99	976	tags=44%, list=20%, signal=54%
GSE24142_DN2_VS_DN3_THYMOCYTE_FETAL_DN	GSE24142_DN2_VS_DN3_THYMOCYTE_FETAL_DN	Details ...	59	-0.458948	-1.96014	0	0.00604998	0.99	967	tags=46%, list=20%, signal=56%
CHICAS_RB1_TARGETS_SENESCENT	CHICAS_RB1_TARGETS_SENESCENT	Details ...	178	-0.393937	-1.95967	0	0.00609392	0.99	712	tags=28%, list=15%, signal=32%
RODRIGUES_THYROID_CARCINOMA_ANAPLASTIC_UP	RODRIGUES_THYROID_CARCINOMA_ANAPLASTIC_UP	Details ...	229	-0.380912	-1.95956	0	0.00611265	0.99	1396	tags=44%, list=29%, signal=59%
GSE7460_TREG_VS_TCONV_ACT_UP	GSE7460_TREG_VS_TCONV_ACT_UP	Details ...	43	-0.530168	-1.95891	0	0.00618114	0.99	619	tags=35%, list=13%, signal=40%
GSE1460_INTRATHYMIC_T_PROGENITOR_VS_CD4_THYMOCYTE_DN	GSE1460_INTRATHYMIC_T_PROGENITOR_VS_CD4_THYMOCYTE_DN	Details ...	54	-0.468198	-1.9583	0	0.00617472	0.99	1212	tags=61%, list=25%, signal=80%
GSE9988_LOW_LPS_VS_VEHICLE_TREATED_MONOCYTE_UP	GSE9988_LOW_LPS_VS_VEHICLE_TREATED_MONOCYTE_UP	Details ...	44	-0.513287	-1.95789	0	0.00618079	0.99	985	tags=57%, list=20%, signal=71%
GSE24634_IL4_VS_CTRL_TREATED_NAIVE_CD4_TCELL_DAY3_DN	GSE24634_IL4_VS_CTRL_TREATED_NAIVE_CD4_TCELL_DAY3_DN	Details ...	68	-0.459022	-1.95777	0	0.00618693	0.99	823	tags=40%, list=17%, signal=47%
GOMF_GROWTH_FACTOR_BINDING	GOMF_GROWTH_FACTOR_BINDING	Details ...	43	-0.50967	-1.95707	0	0.00620576	0.99	1196	tags=70%, list=24%, signal=92%
HP_SCARRING	HP_SCARRING	Details ...	45	-0.492951	-1.95647	0	0.00624941	0.99	461	tags=33%, list=9%, signal=36%
ENGELMANN_CANCER_PROGENITORS_UP	ENGELMANN_CANCER_PROGENITORS_UP	Details ...	16	-0.648107	-1.95593	0	0.00628041	0.99	972	tags=63%, list=20%, signal=78%
KIM_RESPONSE_TO_TSA_AND_DECITABINE_UP	KIM_RESPONSE_TO_TSA_AND_DECITABINE_UP	Details ...	34	-0.539489	-1.95559	0	0.00631125	0.99	419	tags=38%, list=9%, signal=42%
GSE9509_LPS_VS_LPS_AND_IL10_STIM_IL10_KO_MACROPHAGE_10MIN_UP	GSE9509_LPS_VS_LPS_AND_IL10_STIM_IL10_KO_MACROPHAGE_10MIN_UP	Details ...	57	-0.469576	-1.95545	0	0.00630474	0.99	781	tags=40%, list=16%, signal=47%
WP_VITAMIN_D_RECEPTOR_PATHWAY	WP_VITAMIN_D_RECEPTOR_PATHWAY	Details ...	36	-0.504681	-1.95401	0	0.00639754	0.99	880	tags=47%, list=18%, signal=57%
GOBP_TISSUE_REMODELING	GOBP_TISSUE_REMODELING	Details ...	49	-0.496082	-1.95387	0	0.00639096	0.99	1056	tags=53%, list=22%, signal=67%
GSE36392_TYPE_2_MYELOID_VS_NEUTROPHIL_IL25_TREATED_LUNG_UP	GSE36392_TYPE_2_MYELOID_VS_NEUTROPHIL_IL25_TREATED_LUNG_UP	Details ...	50	-0.469911	-1.95387	0	0.00638439	0.99	1143	tags=50%, list=23%, signal=65%
GOBP_REGULATION_OF_EPITHELIAL_CELL_MIGRATION	GOBP_REGULATION_OF_EPITHELIAL_CELL_MIGRATION	Details ...	65	-0.485449	-1.9538	0	0.00637784	0.99	1025	tags=46%, list=21%, signal=58%
GOBP_RESPONSE_TO_MECHANICAL_STIMULUS	GOBP_RESPONSE_TO_MECHANICAL_STIMULUS	Details ...	61	-0.472713	-1.95342	0	0.0064085	0.99	922	tags=48%, list=19%, signal=58%
GOBP_EMBRYO_IMPLANTATION	GOBP_EMBRYO_IMPLANTATION	Details ...	17	-0.630997	-1.95319	0	0.0064391	0.99	1045	tags=71%, list=21%, signal=89%
HP_ABNORMAL_URINE_PROTEIN_LEVEL	HP_ABNORMAL_URINE_PROTEIN_LEVEL	Details ...	36	-0.518312	-1.95299	0	0.00645728	0.99	799	tags=39%, list=16%, signal=46%
WP_HIPPOMERLIN_SIGNALING_DYSREGULATION	WP_HIPPOMERLIN_SIGNALING_DYSREGULATION	Details ...	28	-0.56187	-1.95294	0	0.00645068	0.99	738	tags=57%, list=15%, signal=67%
GOBP_POSITIVE_REGULATION_OF_NF_KAPPAB_TRANSCRIPTION_FACTOR_ACTIVITY	GOBP_POSITIVE_REGULATION_OF_NF_KAPPAB_TRANSCRIPTION_FACTOR_ACTIVITY	Details ...	45	-0.478779	-1.95267	0	0.00648119	0.99	1136	tags=49%, list=23%, signal=63%
TRAVAGLINI_LUNG_OLR1_CLASSICAL_MONOCYTE_CELL	TRAVAGLINI_LUNG_OLR1_CLASSICAL_MONOCYTE_CELL	Details ...	245	-0.370817	-1.95262	0	0.00647457	0.99	1460	tags=55%, list=30%, signal=75%
CHIARADONNA_NEOPLASTIC_TRANSFORMATION_KRAS_CDC25_UP	CHIARADONNA_NEOPLASTIC_TRANSFORMATION_KRAS_CDC25_UP	Details ...	22	-0.593554	-1.9519	0	0.00650471	0.99	695	tags=55%, list=14%, signal=63%
MEISSNER_NPC_HCP_WITH_H3_UNMETHYLATED	MEISSNER_NPC_HCP_WITH_H3_UNMETHYLATED	Details ...	111	-0.427882	-1.95185	0	0.00652261	0.99	622	tags=34%, list=13%, signal=38%
GSE18791_CTRL_VS_NEWCASTLE_VIRUS_DC_6H_DN	GSE18791_CTRL_VS_NEWCASTLE_VIRUS_DC_6H_DN	Details ...	62	-0.506741	-1.95144	0	0.00654068	0.99	1430	tags=63%, list=29%, signal=88%
OLSSON_E2F3_TARGETS_DN	OLSSON_E2F3_TARGETS_DN	Details ...	17	-0.608587	-1.95143	0	0.00653404	0.99	306	tags=35%, list=6%, signal=38%
BLANCO_MELO_BRONCHIAL_EPITHELIAL_CELLS_INFLUENZA_A_INFECTION_UP	BLANCO_MELO_BRONCHIAL_EPITHELIAL_CELLS_INFLUENZA_A_INFECTION_UP	Details ...	37	-0.495037	-1.95103	0	0.00653965	0.99	800	tags=46%, list=16%, signal=55%
GNF2_PTPRC	GNF2_PTPRC	Details ...	19	-0.608111	-1.95073	0	0.00654523	0.99	1228	tags=74%, list=25%, signal=98%
GOCC_VESICLE_LUMEN	GOCC_VESICLE_LUMEN	Details ...	83	-0.437752	-1.95033	0	0.0065632	0.99	954	tags=40%, list=20%, signal=49%
MODULE_112	MODULE_112	Details ...	59	-0.476513	-1.94947	0	0.00661737	0.99	419	tags=39%, list=9%, signal=42%
PILON_KLF1_TARGETS_UP	PILON_KLF1_TARGETS_UP	Details ...	127	-0.405818	-1.94936	0	0.00661067	0.99	992	tags=38%, list=20%, signal=46%
MCBRYAN_PUBERTAL_BREAST_4_5WK_UP	MCBRYAN_PUBERTAL_BREAST_4_5WK_UP	Details ...	94	-0.462531	-1.94897	0	0.00662811	0.99	647	tags=38%, list=13%, signal=43%
HP_CARIOUS_TEETH	HP_CARIOUS_TEETH	Details ...	38	-0.506268	-1.9486	0	0.00664577	0.99	480	tags=29%, list=10%, signal=32%
GSE9960_HEALTHY_VS_GRAM_POS_SEPSIS_PBMC_DN	GSE9960_HEALTHY_VS_GRAM_POS_SEPSIS_PBMC_DN	Details ...	57	-0.46638	-1.94839	0	0.00663907	0.99	1082	tags=49%, list=22%, signal=62%
SRF_C	SRF_C	Details ...	65	-0.458406	-1.94833	0	0.00663239	0.99	1113	tags=51%, list=23%, signal=65%
SENGUPTA_NASOPHARYNGEAL_CARCINOMA_UP	SENGUPTA_NASOPHARYNGEAL_CARCINOMA_UP	Details ...	107	-0.416048	-1.94807	0	0.00665005	0.99	784	tags=28%, list=16%, signal=33%
DESCARTES_MAIN_FETAL_EXTRAVILLOUS_TROPHOBLASTS	DESCARTES_MAIN_FETAL_EXTRAVILLOUS_TROPHOBLASTS	Details ...	37	-0.523767	-1.94798	0	0.00665541	0.99	1273	tags=65%, list=26%, signal=87%
GOBP_REGULATION_OF_ENDOTHELIAL_CELL_MIGRATION	GOBP_REGULATION_OF_ENDOTHELIAL_CELL_MIGRATION	Details ...	51	-0.472572	-1.94761	0	0.00664873	0.99	1025	tags=47%, list=21%, signal=59%
GSE26030_TH1_VS_TH17_DAY5_POST_POLARIZATION_UP	GSE26030_TH1_VS_TH17_DAY5_POST_POLARIZATION_UP	Details ...	62	-0.463301	-1.94711	0	0.00669063	0.99	1362	tags=60%, list=28%, signal=82%
HALLMARK_MYOGENESIS	HALLMARK_MYOGENESIS	Details ...	56	-0.471682	-1.94708	0	0.00668393	0.99	879	tags=48%, list=18%, signal=58%
TGANTCA_AP1_C	TGANTCA_AP1_C	Details ...	295	-0.368631	-1.94691	0	0.00670147	0.99	954	tags=37%, list=20%, signal=44%
GOBP_CELL_SUBSTRATE_ADHESION	GOBP_CELL_SUBSTRATE_ADHESION	Details ...	123	-0.425472	-1.94677	0	0.00669477	0.99	855	tags=41%, list=18%, signal=49%
GSE3565_CTRL_VS_LPS_INJECTED_SPLENOCYTES_UP	GSE3565_CTRL_VS_LPS_INJECTED_SPLENOCYTES_UP	Details ...	59	-0.470816	-1.94632	0	0.0067241	0.99	1319	tags=63%, list=27%, signal=85%
GOBP_EPITHELIUM_DEVELOPMENT	GOBP_EPITHELIUM_DEVELOPMENT	Details ...	290	-0.368533	-1.94588	0	0.00675341	0.99	924	tags=36%, list=19%, signal=42%
FLECHNER_BIOPSY_KIDNEY_TRANSPLANT_REJECTED_VS_OK_UP	FLECHNER_BIOPSY_KIDNEY_TRANSPLANT_REJECTED_VS_OK_UP	Details ...	15	-0.635954	-1.94559	0	0.0067829	0.99	649	tags=53%, list=13%, signal=61%
RICKMAN_METASTASIS_DN	RICKMAN_METASTASIS_DN	Details ...	80	-0.421032	-1.94538	0	0.00678812	0.99	1445	tags=54%, list=30%, signal=75%
GOBP_MUSCLE_TISSUE_DEVELOPMENT	GOBP_MUSCLE_TISSUE_DEVELOPMENT	Details ...	102	-0.424218	-1.94511	0	0.00679333	0.99	687	tags=36%, list=14%, signal=41%
GOBP_MORPHOGENESIS_OF_AN_EPITHELIUM	GOBP_MORPHOGENESIS_OF_AN_EPITHELIUM	Details ...	153	-0.404084	-1.94473	0	0.00680388	0.99	651	tags=31%, list=13%, signal=35%
HP_ABNORMAL_SYSTEMIC_BLOOD_PRESSURE	HP_ABNORMAL_SYSTEMIC_BLOOD_PRESSURE	Details ...	111	-0.432289	-1.94424	0	0.00683304	1	851	tags=34%, list=17%, signal=41%
GARCIA_PINERES_PBMC_HPV_16_L1_VLP_AGE_18_25YO_STIMULATED_VS_UNSTIMULATED_0DY_VACCINATION_INDEPENDENT_UP	GARCIA_PINERES_PBMC_HPV_16_L1_VLP_AGE_18_25YO_STIMULATED_VS_UNSTIMULATED_0DY_VACCINATION_INDEPENDENT_UP	Details ...	77	-0.466445	-1.94314	0	0.00699347	1	784	tags=38%, list=16%, signal=44%
REACTOME_INTERFERON_SIGNALING	REACTOME_INTERFERON_SIGNALING	Details ...	59	-0.476876	-1.94264	0	0.00699848	1	1400	tags=61%, list=29%, signal=84%
GOBP_KERATINOCYTE_DIFFERENTIATION	GOBP_KERATINOCYTE_DIFFERENTIATION	Details ...	37	-0.521546	-1.94202	0	0.00701539	1	768	tags=43%, list=16%, signal=51%
GOBP_NEGATIVE_REGULATION_OF_MYELOID_LEUKOCYTE_DIFFERENTIATION	GOBP_NEGATIVE_REGULATION_OF_MYELOID_LEUKOCYTE_DIFFERENTIATION	Details ...	16	-0.61823	-1.94106	0	0.00706785	1	759	tags=44%, list=16%, signal=52%
WATANABE_RECTAL_CANCER_RADIOTHERAPY_RESPONSIVE_DN	WATANABE_RECTAL_CANCER_RADIOTHERAPY_RESPONSIVE_DN	Details ...	41	-0.495136	-1.94082	0	0.00708459	1	924	tags=39%, list=19%, signal=48%
JIANG_TIP30_TARGETS_UP	JIANG_TIP30_TARGETS_UP	Details ...	15	-0.627969	-1.94058	0	0.00708949	1	1339	tags=73%, list=27%, signal=101%
MIR2113	MIR2113	Details ...	57	-0.457158	-1.94056	0	0.0070825	1	878	tags=39%, list=18%, signal=47%
AIZARANI_LIVER_C11_HEPATOCYTES_1	AIZARANI_LIVER_C11_HEPATOCYTES_1	Details ...	54	-0.481665	-1.93976	0	0.0071754	1	380	tags=31%, list=8%, signal=34%
GOBP_CARDIAC_CHAMBER_MORPHOGENESIS	GOBP_CARDIAC_CHAMBER_MORPHOGENESIS	Details ...	33	-0.544503	-1.93923	0	0.00718029	1	651	tags=55%, list=13%, signal=63%
GSE26890_CXCR1_NEG_VS_POS_EFFECTOR_CD8_TCELL_UP	GSE26890_CXCR1_NEG_VS_POS_EFFECTOR_CD8_TCELL_UP	Details ...	69	-0.456311	-1.93901	0	0.00718498	1	1268	tags=54%, list=26%, signal=71%
HALLMARK_KRAS_SIGNALING_UP	HALLMARK_KRAS_SIGNALING_UP	Details ...	54	-0.474612	-1.93858	0	0.00720633	1	608	tags=41%, list=12%, signal=46%
GSE19512_NAUTRAL_VS_INDUCED_TREG_DN	GSE19512_NAUTRAL_VS_INDUCED_TREG_DN	Details ...	44	-0.494604	-1.93847	0	0.00719928	1	933	tags=52%, list=19%, signal=64%
WAMUNYOKOLI_OVARIAN_CANCER_GRADES_1_2_DN	WAMUNYOKOLI_OVARIAN_CANCER_GRADES_1_2_DN	Details ...	30	-0.574842	-1.93785	0	0.00723237	1	1010	tags=57%, list=21%, signal=71%
GOBP_PLATELET_ACTIVATION	GOBP_PLATELET_ACTIVATION	Details ...	43	-0.516622	-1.93704	0	0.00729584	1	542	tags=35%, list=11%, signal=39%
GOCC_INTERMEDIATE_FILAMENT_CYTOSKELETON	GOCC_INTERMEDIATE_FILAMENT_CYTOSKELETON	Details ...	26	-0.563015	-1.93656	0	0.00734755	1	1210	tags=58%, list=25%, signal=76%
GOBP_REGULATION_OF_MULTICELLULAR_ORGANISMAL_DEVELOPMENT	GOBP_REGULATION_OF_MULTICELLULAR_ORGANISMAL_DEVELOPMENT	Details ...	361	-0.363082	-1.93636	0	0.00735224	1	683	tags=29%, list=14%, signal=31%
GOLDRATH_NAIVE_VS_MEMORY_CD8_TCELL_DN	GOLDRATH_NAIVE_VS_MEMORY_CD8_TCELL_DN	Details ...	63	-0.485161	-1.93613	0	0.00736844	1	1045	tags=56%, list=21%, signal=70%
GSE19888_CTRL_VS_TCELL_MEMBRANES_ACT_MAST_CELL_PRETREAT_A3R_INH_DN	GSE19888_CTRL_VS_TCELL_MEMBRANES_ACT_MAST_CELL_PRETREAT_A3R_INH_DN	Details ...	59	-0.475857	-1.93587	0	0.00743164	1	1160	tags=54%, list=24%, signal=70%
GOBP_ERYTHROCYTE_HOMEOSTASIS	GOBP_ERYTHROCYTE_HOMEOSTASIS	Details ...	32	-0.541485	-1.93554	0	0.00745962	1	1268	tags=59%, list=26%, signal=80%
NABA_COLLAGENS	NABA_COLLAGENS	Details ...	19	-0.590561	-1.9355	0	0.00745239	1	374	tags=53%, list=8%, signal=57%
GOBP_CORNIFICATION	GOBP_CORNIFICATION	Details ...	16	-0.615236	-1.93541	0	0.00745689	1	768	tags=50%, list=16%, signal=59%
HP_TISSUE_ISCHEMIA	HP_TISSUE_ISCHEMIA	Details ...	35	-0.530264	-1.93463	0	0.00750809	1	1138	tags=57%, list=23%, signal=74%
AIZARANI_LIVER_C20_LSECS_3	AIZARANI_LIVER_C20_LSECS_3	Details ...	99	-0.415828	-1.93438	0	0.00751249	1	1454	tags=62%, list=30%, signal=86%
BUYTAERT_PHOTODYNAMIC_THERAPY_STRESS_DN	BUYTAERT_PHOTODYNAMIC_THERAPY_STRESS_DN	Details ...	217	-0.381902	-1.93434	0	0.00751678	1	882	tags=28%, list=18%, signal=33%
KYNG_ENVIRONMENTAL_STRESS_RESPONSE_UP	KYNG_ENVIRONMENTAL_STRESS_RESPONSE_UP	Details ...	16	-0.6898	-1.93409	0	0.00750953	1	1144	tags=75%, list=23%, signal=98%
GOMF_GROWTH_FACTOR_ACTIVITY	GOMF_GROWTH_FACTOR_ACTIVITY	Details ...	41	-0.519742	-1.93386	0	0.00753723	1	648	tags=49%, list=13%, signal=56%
GSE13522_WT_VS_IFNAR_KO_SKING_T_CRUZI_Y_STRAIN_INF_UP	GSE13522_WT_VS_IFNAR_KO_SKING_T_CRUZI_Y_STRAIN_INF_UP	Details ...	58	-0.462163	-1.93377	0	0.00754168	1	786	tags=38%, list=16%, signal=45%
GHANDHI_DIRECT_IRRADIATION_UP	GHANDHI_DIRECT_IRRADIATION_UP	Details ...	29	-0.558326	-1.93373	0	0.0075461	1	795	tags=52%, list=16%, signal=61%
GOBP_NEGATIVE_REGULATION_OF_ENDOTHELIAL_CELL_PROLIFERATION	GOBP_NEGATIVE_REGULATION_OF_ENDOTHELIAL_CELL_PROLIFERATION	Details ...	15	-0.642226	-1.93357	0	0.00755051	1	805	tags=67%, list=16%, signal=80%
GNF2_ITGB2	GNF2_ITGB2	Details ...	16	-0.637636	-1.93307	0	0.00756643	1	1231	tags=75%, list=25%, signal=100%
PEDRIOLI_MIR31_TARGETS_DN	PEDRIOLI_MIR31_TARGETS_DN	Details ...	89	-0.43857	-1.93276	0	0.00755917	1	787	tags=40%, list=16%, signal=47%
GOBP_ADAPTIVE_THERMOGENESIS	GOBP_ADAPTIVE_THERMOGENESIS	Details ...	41	-0.484726	-1.93201	0	0.00760981	1	217	tags=27%, list=4%, signal=28%
REACTOME_CARGO_RECOGNITION_FOR_CLATHRIN_MEDIATED_ENDOCYTOSIS	REACTOME_CARGO_RECOGNITION_FOR_CLATHRIN_MEDIATED_ENDOCYTOSIS	Details ...	26	-0.523091	-1.93151	0	0.00766044	1	474	tags=27%, list=10%, signal=30%
HP_APLASIA_HYPOPLASIA_OF_THE_EYEBROW	HP_APLASIA_HYPOPLASIA_OF_THE_EYEBROW	Details ...	36	-0.540376	-1.93137	0	0.00765311	1	228	tags=28%, list=5%, signal=29%
HP_ABNORMAL_CORONARY_ARTERY_MORPHOLOGY	HP_ABNORMAL_CORONARY_ARTERY_MORPHOLOGY	Details ...	16	-0.613922	-1.93037	0	0.00778388	1	959	tags=63%, list=20%, signal=78%
HP_RENAL_INSUFFICIENCY	HP_RENAL_INSUFFICIENCY	Details ...	64	-0.461411	-1.92959	0	0.00783063	1	943	tags=38%, list=19%, signal=46%
GOBP_ZYMOGEN_ACTIVATION	GOBP_ZYMOGEN_ACTIVATION	Details ...	15	-0.650595	-1.92955	0	0.00782317	1	768	tags=67%, list=16%, signal=79%
GSE2585_CTEC_VS_MTEC_THYMUS_DN	GSE2585_CTEC_VS_MTEC_THYMUS_DN	Details ...	53	-0.490127	-1.92951	0	0.00781573	1	597	tags=38%, list=12%, signal=43%
GOCC_PLATELET_ALPHA_GRANULE	GOCC_PLATELET_ALPHA_GRANULE	Details ...	25	-0.595587	-1.92822	0	0.00800354	1	753	tags=60%, list=15%, signal=71%
GOBP_CARDIAC_MUSCLE_TISSUE_DEVELOPMENT	GOBP_CARDIAC_MUSCLE_TISSUE_DEVELOPMENT	Details ...	56	-0.470859	-1.9279	0	0.00802269	1	747	tags=43%, list=15%, signal=50%
LEF1_UP.V1_UP	LEF1_UP.V1_UP	Details ...	59	-0.468998	-1.92754	0	0.00804962	1	674	tags=47%, list=14%, signal=54%
HUANG_GATA2_TARGETS_UP	HUANG_GATA2_TARGETS_UP	Details ...	49	-0.471949	-1.92737	0	0.0080647	1	1333	tags=59%, list=27%, signal=81%
HP_PES_VALGUS	HP_PES_VALGUS	Details ...	18	-0.57442	-1.92706	0	0.00805707	1	689	tags=44%, list=14%, signal=52%
GOBP_BASEMENT_MEMBRANE_ORGANIZATION	GOBP_BASEMENT_MEMBRANE_ORGANIZATION	Details ...	16	-0.648073	-1.927	0	0.00804945	1	490	tags=50%, list=10%, signal=55%
OKUMURA_INFLAMMATORY_RESPONSE_LPS	OKUMURA_INFLAMMATORY_RESPONSE_LPS	Details ...	53	-0.451125	-1.92657	0	0.00806459	1	751	tags=38%, list=15%, signal=44%
SMID_BREAST_CANCER_BASAL_DN	SMID_BREAST_CANCER_BASAL_DN	Details ...	212	-0.370549	-1.92582	0	0.00812921	1	574	tags=27%, list=12%, signal=29%
GOBP_POSITIVE_REGULATION_OF_MULTICELLULAR_ORGANISMAL_PROCESS	GOBP_POSITIVE_REGULATION_OF_MULTICELLULAR_ORGANISMAL_PROCESS	Details ...	356	-0.360117	-1.9255	0	0.00815565	1	683	tags=28%, list=14%, signal=30%
GSE13484_12H_UNSTIM_VS_YF17D_VACCINE_STIM_PBMC_DN	GSE13484_12H_UNSTIM_VS_YF17D_VACCINE_STIM_PBMC_DN	Details ...	57	-0.468256	-1.92542	0	0.00814797	1	937	tags=51%, list=19%, signal=62%
GOBP_REGULATION_OF_TUBE_SIZE	GOBP_REGULATION_OF_TUBE_SIZE	Details ...	33	-0.541081	-1.92479	0	0.00824257	1	267	tags=33%, list=5%, signal=35%
GOMF_METALLOPEPTIDASE_ACTIVITY	GOMF_METALLOPEPTIDASE_ACTIVITY	Details ...	31	-0.529974	-1.92469	0	0.00823483	1	684	tags=45%, list=14%, signal=52%
GOBP_REGULATION_OF_LEUKOCYTE_MIGRATION	GOBP_REGULATION_OF_LEUKOCYTE_MIGRATION	Details ...	53	-0.501263	-1.92448	0	0.00827239	1	611	tags=38%, list=13%, signal=43%
GSE7509_DC_VS_MONOCYTE_UP	GSE7509_DC_VS_MONOCYTE_UP	Details ...	69	-0.422579	-1.92397	0	0.00834395	1	1138	tags=45%, list=23%, signal=58%
GSE17721_LPS_VS_GARDIQUIMOD_24H_BMDC_UP	GSE17721_LPS_VS_GARDIQUIMOD_24H_BMDC_UP	Details ...	50	-0.464101	-1.9237	0	0.00834739	1	854	tags=38%, list=17%, signal=46%
GOBP_RESPONSE_TO_ESTROGEN	GOBP_RESPONSE_TO_ESTROGEN	Details ...	24	-0.562417	-1.92321	0	0.00836238	1	814	tags=50%, list=17%, signal=60%
TRAVAGLINI_LUNG_LIPOFIBROBLAST_CELL	TRAVAGLINI_LUNG_LIPOFIBROBLAST_CELL	Details ...	59	-0.482684	-1.92225	0	0.00845615	1	910	tags=47%, list=19%, signal=58%
TAZ_TARGET_GENES	TAZ_TARGET_GENES	Details ...	120	-0.397095	-1.92175	0	0.00854983	1	791	tags=28%, list=16%, signal=33%
GSE22140_HEALTHY_VS_ARTHRITIC_GERMFREE_MOUSE_CD4_TCELL_DN	GSE22140_HEALTHY_VS_ARTHRITIC_GERMFREE_MOUSE_CD4_TCELL_DN	Details ...	77	-0.439722	-1.92093	0	0.00864299	1	1492	tags=58%, list=31%, signal=83%
GSE1460_DP_THYMOCYTE_VS_NAIVE_CD4_TCELL_ADULT_BLOOD_DN	GSE1460_DP_THYMOCYTE_VS_NAIVE_CD4_TCELL_ADULT_BLOOD_DN	Details ...	58	-0.462249	-1.9207	0	0.0086606	1	1292	tags=53%, list=26%, signal=72%
BOYLAN_MULTIPLE_MYELOMA_C_D_DN	BOYLAN_MULTIPLE_MYELOMA_C_D_DN	Details ...	76	-0.451804	-1.92027	0	0.0087201	1	775	tags=42%, list=16%, signal=49%
BLANCO_MELO_COVID19_SARS_COV_2_POS_PATIENT_LUNG_TISSUE_UP	BLANCO_MELO_COVID19_SARS_COV_2_POS_PATIENT_LUNG_TISSUE_UP	Details ...	25	-0.548281	-1.92021	0	0.0087457	1	1063	tags=64%, list=22%, signal=81%
GOBP_NEGATIVE_REGULATION_OF_PEPTIDASE_ACTIVITY	GOBP_NEGATIVE_REGULATION_OF_PEPTIDASE_ACTIVITY	Details ...	59	-0.458233	-1.91974	0	0.00877101	1	976	tags=44%, list=20%, signal=54%
GOBP_POSITIVE_REGULATION_OF_PROTEIN_PHOSPHORYLATION	GOBP_POSITIVE_REGULATION_OF_PROTEIN_PHOSPHORYLATION	Details ...	200	-0.398553	-1.91961	0	0.00879644	1	1034	tags=39%, list=21%, signal=47%
GSE39864_WT_VS_GATA3_KO_TREG_UP	GSE39864_WT_VS_GATA3_KO_TREG_UP	Details ...	61	-0.460078	-1.91936	0	0.00881056	1	781	tags=39%, list=16%, signal=46%
NAGASHIMA_NRG1_SIGNALING_UP	NAGASHIMA_NRG1_SIGNALING_UP	Details ...	64	-0.452206	-1.91921	0	0.00885816	1	861	tags=47%, list=18%, signal=56%
GOBP_MUSCLE_CELL_DIFFERENTIATION	GOBP_MUSCLE_CELL_DIFFERENTIATION	Details ...	105	-0.414716	-1.91907	0	0.00884997	1	840	tags=35%, list=17%, signal=42%
GOCC_CELL_SURFACE	GOCC_CELL_SURFACE	Details ...	199	-0.379359	-1.91904	0	0.00884179	1	843	tags=39%, list=17%, signal=45%
GSE11057_NAIVE_VS_EFF_MEMORY_CD4_TCELL_DN	GSE11057_NAIVE_VS_EFF_MEMORY_CD4_TCELL_DN	Details ...	81	-0.427186	-1.9187	0	0.00886687	1	1238	tags=58%, list=25%, signal=76%
GSE2197_CPG_DNA_VS_UNTREATED_IN_DC_UP	GSE2197_CPG_DNA_VS_UNTREATED_IN_DC_UP	Details ...	52	-0.465017	-1.91849	0	0.00889211	1	707	tags=33%, list=14%, signal=38%
GOBP_NEGATIVE_REGULATION_OF_RESPONSE_TO_STIMULUS	GOBP_NEGATIVE_REGULATION_OF_RESPONSE_TO_STIMULUS	Details ...	444	-0.358758	-1.91847	0	0.00888392	1	1025	tags=37%, list=21%, signal=42%
GROSS_HYPOXIA_VIA_ELK3_DN	GROSS_HYPOXIA_VIA_ELK3_DN	Details ...	51	-0.495728	-1.9183	0	0.00887574	1	1439	tags=71%, list=29%, signal=99%
GOBP_RENAL_SYSTEM_PROCESS	GOBP_RENAL_SYSTEM_PROCESS	Details ...	25	-0.563653	-1.91796	0	0.00891164	1	471	tags=40%, list=10%, signal=44%
GSE7548_DAY7_VS_DAY28_PCC_IMMUNIZATION_CD4_TCELL_UP	GSE7548_DAY7_VS_DAY28_PCC_IMMUNIZATION_CD4_TCELL_UP	Details ...	66	-0.445666	-1.91727	0	0.00895906	1	1159	tags=47%, list=24%, signal=61%
LAKE_ADULT_KIDNEY_C29_UNKNOWN_NOVEL_PT_CFH_POS_SUBPOPULATION_S2	LAKE_ADULT_KIDNEY_C29_UNKNOWN_NOVEL_PT_CFH_POS_SUBPOPULATION_S2	Details ...	27	-0.561166	-1.9172	0	0.00895083	1	1189	tags=63%, list=24%, signal=83%
CEBP_Q2_01	CEBP_Q2_01	Details ...	62	-0.437056	-1.9171	0	0.00894563	1	1159	tags=52%, list=24%, signal=67%
MASSARWEH_TAMOXIFEN_RESISTANCE_UP	MASSARWEH_TAMOXIFEN_RESISTANCE_UP	Details ...	170	-0.388832	-1.91706	0	0.00894844	1	1387	tags=54%, list=28%, signal=73%
GOBP_REGULATION_OF_BMP_SIGNALING_PATHWAY	GOBP_REGULATION_OF_BMP_SIGNALING_PATHWAY	Details ...	29	-0.567943	-1.91691	0	0.00894025	1	999	tags=66%, list=20%, signal=82%
MARTIN_NFKB_TARGETS_UP	MARTIN_NFKB_TARGETS_UP	Details ...	16	-0.634566	-1.91618	0	0.00898717	1	781	tags=56%, list=16%, signal=67%
NADLER_OBESITY_UP	NADLER_OBESITY_UP	Details ...	28	-0.526222	-1.91614	0	0.00897896	1	1167	tags=64%, list=24%, signal=84%
WP_AGERAGE_PATHWAY	WP_AGERAGE_PATHWAY	Details ...	19	-0.597479	-1.91578	0	0.00897077	1	1396	tags=74%, list=29%, signal=103%
GOBP_EXTRINSIC_APOPTOTIC_SIGNALING_PATHWAY	GOBP_EXTRINSIC_APOPTOTIC_SIGNALING_PATHWAY	Details ...	70	-0.451413	-1.91561	0	0.00896259	1	1403	tags=56%, list=29%, signal=77%
HP_ABNORMAL_CAROTID_ARTERY_MORPHOLOGY	HP_ABNORMAL_CAROTID_ARTERY_MORPHOLOGY	Details ...	21	-0.56811	-1.91499	0	0.00906687	1	847	tags=48%, list=17%, signal=57%
GOBP_EMBRYO_DEVELOPMENT	GOBP_EMBRYO_DEVELOPMENT	Details ...	268	-0.362986	-1.91416	0	0.0091245	1	1056	tags=40%, list=22%, signal=48%
GOBP_SECRETION	GOBP_SECRETION	Details ...	354	-0.345708	-1.91412	0	0.00911621	1	908	tags=32%, list=19%, signal=36%
GOBP_CELL_MIGRATION	GOBP_CELL_MIGRATION	Details ...	405	-0.35507	-1.91355	0	0.00916278	1	1233	tags=45%, list=25%, signal=55%
PSMB5_TARGET_GENES	PSMB5_TARGET_GENES	Details ...	99	-0.423923	-1.91337	0	0.00915447	1	1173	tags=39%, list=24%, signal=51%
GSE24634_TREG_VS_TCONV_POST_DAY3_IL4_CONVERSION_DN	GSE24634_TREG_VS_TCONV_POST_DAY3_IL4_CONVERSION_DN	Details ...	56	-0.486907	-1.91306	0	0.00915717	1	1068	tags=48%, list=22%, signal=61%
GSE7831_UNSTIM_VS_INFLUENZA_STIM_PDC_4H_UP	GSE7831_UNSTIM_VS_INFLUENZA_STIM_PDC_4H_UP	Details ...	59	-0.430002	-1.91294	0	0.00915983	1	871	tags=39%, list=18%, signal=47%
REACTOME_G_ALPHA_Q_SIGNALLING_EVENTS	REACTOME_G_ALPHA_Q_SIGNALLING_EVENTS	Details ...	38	-0.481811	-1.91275	0	0.00917344	1	474	tags=34%, list=10%, signal=38%
LAKE_ADULT_KIDNEY_C6_PROXIMAL_TUBULE_EPITHELIAL_CELLS_FIBRINOGEN_POS_S3	LAKE_ADULT_KIDNEY_C6_PROXIMAL_TUBULE_EPITHELIAL_CELLS_FIBRINOGEN_POS_S3	Details ...	59	-0.451263	-1.9126	0	0.00916515	1	1160	tags=51%, list=24%, signal=66%
GOBP_I_KAPPAB_KINASE_NF_KAPPAB_SIGNALING	GOBP_I_KAPPAB_KINASE_NF_KAPPAB_SIGNALING	Details ...	85	-0.428957	-1.91259	0	0.00915688	1	1401	tags=58%, list=29%, signal=79%
GSE3337_CTRL_VS_16H_IFNG_IN_CD8POS_DC_UP	GSE3337_CTRL_VS_16H_IFNG_IN_CD8POS_DC_UP	Details ...	49	-0.495419	-1.9122	0	0.00920294	1	1033	tags=49%, list=21%, signal=61%
GSE42088_UNINF_VS_LEISHMANIA_INF_DC_24H_DN	GSE42088_UNINF_VS_LEISHMANIA_INF_DC_24H_DN	Details ...	66	-0.438382	-1.91218	0	0.0092056	1	1289	tags=50%, list=26%, signal=67%
SENGUPTA_NASOPHARYNGEAL_CARCINOMA_WITH_LMP1_DN	SENGUPTA_NASOPHARYNGEAL_CARCINOMA_WITH_LMP1_DN	Details ...	37	-0.50882	-1.91181	0	0.00921918	1	592	tags=49%, list=12%, signal=55%
GOBP_REGULATION_OF_MUSCLE_SYSTEM_PROCESS	GOBP_REGULATION_OF_MUSCLE_SYSTEM_PROCESS	Details ...	54	-0.450497	-1.91165	0	0.00923267	1	637	tags=30%, list=13%, signal=34%
ZHOU_INFLAMMATORY_RESPONSE_LPS_UP	ZHOU_INFLAMMATORY_RESPONSE_LPS_UP	Details ...	98	-0.399487	-1.91159	0	0.00922438	1	745	tags=35%, list=15%, signal=40%
VERHAAK_AML_WITH_NPM1_MUTATED_UP	VERHAAK_AML_WITH_NPM1_MUTATED_UP	Details ...	46	-0.500515	-1.91157	0	0.0092161	1	1037	tags=57%, list=21%, signal=71%
GOMF_ENDOPEPTIDASE_ACTIVITY	GOMF_ENDOPEPTIDASE_ACTIVITY	Details ...	74	-0.43178	-1.91133	0	0.00922953	1	1009	tags=41%, list=21%, signal=50%
GOBP_INNATE_IMMUNE_RESPONSE	GOBP_INNATE_IMMUNE_RESPONSE	Details ...	205	-0.387174	-1.91086	0	0.00930748	1	1097	tags=39%, list=22%, signal=48%
DELASERNA_MYOD_TARGETS_DN	DELASERNA_MYOD_TARGETS_DN	Details ...	21	-0.619383	-1.90984	0	0.00941796	1	695	tags=52%, list=14%, signal=61%
WP_GPCRS_CLASS_A_RHODOPSINLIKE	WP_GPCRS_CLASS_A_RHODOPSINLIKE	Details ...	28	-0.535134	-1.90861	0	0.0094957	1	267	tags=36%, list=5%, signal=38%
HP_ABNORMAL_ADIPOSE_TISSUE_MORPHOLOGY	HP_ABNORMAL_ADIPOSE_TISSUE_MORPHOLOGY	Details ...	40	-0.52246	-1.90823	0	0.00949797	1	906	tags=48%, list=19%, signal=58%
HP_JOINT_CONTRACTURE_OF_THE_HAND	HP_JOINT_CONTRACTURE_OF_THE_HAND	Details ...	68	-0.437245	-1.908	0	0.00951112	1	689	tags=32%, list=14%, signal=37%
GOBP_REGULATION_OF_INTRINSIC_APOPTOTIC_SIGNALING_PATHWAY	GOBP_REGULATION_OF_INTRINSIC_APOPTOTIC_SIGNALING_PATHWAY	Details ...	49	-0.483938	-1.90783	0	0.00951346	1	1123	tags=45%, list=23%, signal=58%
MIR4804_3P	MIR4804_3P	Details ...	20	-0.624878	-1.90782	0	0.00950498	1	492	tags=45%, list=10%, signal=50%
GSE19198_CTRL_VS_IL21_TREATED_TCELL_1H_DN	GSE19198_CTRL_VS_IL21_TREATED_TCELL_1H_DN	Details ...	63	-0.457955	-1.9077	0	0.00951785	1	1014	tags=49%, list=21%, signal=61%
GOBP_REGULATION_OF_CYTOSOLIC_CALCIUM_ION_CONCENTRATION	GOBP_REGULATION_OF_CYTOSOLIC_CALCIUM_ION_CONCENTRATION	Details ...	63	-0.456267	-1.90766	0	0.00950938	1	430	tags=29%, list=9%, signal=31%
GOBP_POSITIVE_REGULATION_OF_INTRACELLULAR_SIGNAL_TRANSDUCTION	GOBP_POSITIVE_REGULATION_OF_INTRACELLULAR_SIGNAL_TRANSDUCTION	Details ...	266	-0.37162	-1.90741	0	0.00954385	1	673	tags=28%, list=14%, signal=31%
MCBRYAN_PUBERTAL_BREAST_3_4WK_UP	MCBRYAN_PUBERTAL_BREAST_3_4WK_UP	Details ...	63	-0.461113	-1.90648	0	0.00962096	1	862	tags=40%, list=18%, signal=48%
MIR6828_3P	MIR6828_3P	Details ...	29	-0.527795	-1.90599	0	0.00963381	1	1038	tags=52%, list=21%, signal=65%
MODULE_118	MODULE_118	Details ...	146	-0.39078	-1.90508	0	0.00978548	1	590	tags=27%, list=12%, signal=29%
MATSUMIYA_PBMC_MODIFIED_VACCINIA_ANKARA_VACCINE_AGE_18_55YO_VACCINATED_VS_CONTROL_TREATED_IN_VITRO_WITH_MVA85A_6HR_UP	MATSUMIYA_PBMC_MODIFIED_VACCINIA_ANKARA_VACCINE_AGE_18_55YO_VACCINATED_VS_CONTROL_TREATED_IN_VITRO_WITH_MVA85A_6HR_UP	Details ...	29	-0.532026	-1.90492	0	0.00980864	1	1107	tags=55%, list=23%, signal=71%
WEST_ADRENOCORTICAL_TUMOR_DN	WEST_ADRENOCORTICAL_TUMOR_DN	Details ...	167	-0.387142	-1.90475	0	0.00984272	1	913	tags=38%, list=19%, signal=45%
GOBP_INTEGRIN_MEDIATED_SIGNALING_PATHWAY	GOBP_INTEGRIN_MEDIATED_SIGNALING_PATHWAY	Details ...	36	-0.532625	-1.90439	0	0.00986602	1	1295	tags=67%, list=27%, signal=90%
INGRAM_SHH_TARGETS_UP	INGRAM_SHH_TARGETS_UP	Details ...	42	-0.489853	-1.90437	0	0.00985731	1	993	tags=48%, list=20%, signal=59%
ESC_V6.5_UP_LATE.V1_UP	ESC_V6.5_UP_LATE.V1_UP	Details ...	45	-0.462711	-1.90427	0	0.00984861	1	734	tags=40%, list=15%, signal=47%
WNT_UP.V1_DN	WNT_UP.V1_DN	Details ...	42	-0.484654	-1.90411	0	0.00986105	1	903	tags=48%, list=18%, signal=58%
GSE6269_HEALTHY_VS_FLU_INF_PBMC_DN	GSE6269_HEALTHY_VS_FLU_INF_PBMC_DN	Details ...	49	-0.471433	-1.90341	0	0.00991613	1	1370	tags=63%, list=28%, signal=87%
HP_SPARSE_HAIR	HP_SPARSE_HAIR	Details ...	77	-0.44153	-1.9023	0	0.00999227	1	480	tags=22%, list=10%, signal=24%
GOBP_DEFENSE_RESPONSE_TO_VIRUS	GOBP_DEFENSE_RESPONSE_TO_VIRUS	Details ...	65	-0.453169	-1.90215	0	0.0100152	1	1377	tags=54%, list=28%, signal=74%
BUSSLINGER_GASTRIC_IMMATURE_PIT_CELLS	BUSSLINGER_GASTRIC_IMMATURE_PIT_CELLS	Details ...	59	-0.480074	-1.90211	0	0.0100169	1	962	tags=49%, list=20%, signal=60%
GSE30971_CTRL_VS_LPS_STIM_MACROPHAGE_WBP7_KO_4H_UP	GSE30971_CTRL_VS_LPS_STIM_MACROPHAGE_WBP7_KO_4H_UP	Details ...	49	-0.471484	-1.90191	0	0.01001	1	1067	tags=51%, list=22%, signal=65%
TAKEDA_TARGETS_OF_NUP98_HOXA9_FUSION_8D_UP	TAKEDA_TARGETS_OF_NUP98_HOXA9_FUSION_8D_UP	Details ...	45	-0.501075	-1.90132	0	0.0101071	1	638	tags=47%, list=13%, signal=53%
GOCC_BLOOD_MICROPARTICLE	GOCC_BLOOD_MICROPARTICLE	Details ...	28	-0.532212	-1.90127	0	0.0100982	1	535	tags=36%, list=11%, signal=40%
TARTE_PLASMA_CELL_VS_B_LYMPHOCYTE_UP	TARTE_PLASMA_CELL_VS_B_LYMPHOCYTE_UP	Details ...	26	-0.539676	-1.90061	0	0.0101333	1	1370	tags=58%, list=28%, signal=80%
GSE39110_UNTREATED_VS_IL2_TREATED_CD8_TCELL_DAY6_POST_IMMUNIZATION_UP	GSE39110_UNTREATED_VS_IL2_TREATED_CD8_TCELL_DAY6_POST_IMMUNIZATION_UP	Details ...	53	-0.461129	-1.90039	0	0.0101349	1	881	tags=47%, list=18%, signal=57%
BLUM_RESPONSE_TO_SALIRASIB_UP	BLUM_RESPONSE_TO_SALIRASIB_UP	Details ...	75	-0.444762	-1.90038	0	0.0101261	1	1794	tags=69%, list=37%, signal=108%
GALINDO_IMMUNE_RESPONSE_TO_ENTEROTOXIN	GALINDO_IMMUNE_RESPONSE_TO_ENTEROTOXIN	Details ...	35	-0.498003	-1.89929	0	0.010233	1	1391	tags=69%, list=28%, signal=95%
GOBP_INFLAMMATORY_RESPONSE	GOBP_INFLAMMATORY_RESPONSE	Details ...	178	-0.386788	-1.89923	0	0.010245	1	1029	tags=40%, list=21%, signal=49%
GOBP_REGULATION_OF_PROTEIN_PHOSPHORYLATION	GOBP_REGULATION_OF_PROTEIN_PHOSPHORYLATION	Details ...	296	-0.359628	-1.8989	0	0.0102361	1	1034	tags=35%, list=21%, signal=41%
HP_MICRODONTIA	HP_MICRODONTIA	Details ...	24	-0.558375	-1.89885	0	0.0102272	1	415	tags=29%, list=8%, signal=32%
SRF_Q6	SRF_Q6	Details ...	75	-0.434151	-1.89851	0	0.0102497	1	1024	tags=49%, list=21%, signal=61%
VANHARANTA_UTERINE_FIBROID_UP	VANHARANTA_UTERINE_FIBROID_UP	Details ...	20	-0.580922	-1.89837	0	0.0102722	1	220	tags=40%, list=5%, signal=42%
MENON_FETAL_KIDNEY_6_COLLECTING_DUCT_CELLS	MENON_FETAL_KIDNEY_6_COLLECTING_DUCT_CELLS	Details ...	31	-0.517665	-1.89818	0	0.0102737	1	1231	tags=61%, list=25%, signal=81%
GSE19888_ADENOSINE_A3R_INH_VS_TCELL_MEMBRANES_ACT_MAST_CELL_UP	GSE19888_ADENOSINE_A3R_INH_VS_TCELL_MEMBRANES_ACT_MAST_CELL_UP	Details ...	52	-0.496644	-1.89706	0	0.0104951	1	1405	tags=63%, list=29%, signal=88%
GSE15659_NAIVE_VS_PTPRC_NEG_CD4_TCELL_DN	GSE15659_NAIVE_VS_PTPRC_NEG_CD4_TCELL_DN	Details ...	35	-0.477496	-1.89705	0	0.010486	1	1163	tags=51%, list=24%, signal=67%
HP_ALOPECIA	HP_ALOPECIA	Details ...	59	-0.454631	-1.89669	0	0.0105499	1	1035	tags=42%, list=21%, signal=53%
GSE25085_FETAL_BM_VS_ADULT_BM_SP4_THYMIC_IMPLANT_UP	GSE25085_FETAL_BM_VS_ADULT_BM_SP4_THYMIC_IMPLANT_UP	Details ...	61	-0.447583	-1.89646	0	0.0105408	1	1213	tags=48%, list=25%, signal=62%
GSE26488_CTRL_VS_PEPTIDE_INJECTION_HDAC7_DELTAP_TG_OT2_THYMOCYTE_UP	GSE26488_CTRL_VS_PEPTIDE_INJECTION_HDAC7_DELTAP_TG_OT2_THYMOCYTE_UP	Details ...	41	-0.516871	-1.89573	0	0.0106047	1	1033	tags=46%, list=21%, signal=58%
GOBP_POSITIVE_REGULATION_OF_MONONUCLEAR_CELL_MIGRATION	GOBP_POSITIVE_REGULATION_OF_MONONUCLEAR_CELL_MIGRATION	Details ...	18	-0.598889	-1.89519	0	0.0106683	1	417	tags=39%, list=9%, signal=42%
PRMT5_TARGET_GENES	PRMT5_TARGET_GENES	Details ...	27	-0.535978	-1.89519	0	0.0106591	1	1136	tags=56%, list=23%, signal=72%
CHEBOTAEV_GR_TARGETS_DN	CHEBOTAEV_GR_TARGETS_DN	Details ...	44	-0.541775	-1.89495	0	0.010681	1	837	tags=55%, list=17%, signal=65%
HP_ABNORMAL_VASCULAR_PHYSIOLOGY	HP_ABNORMAL_VASCULAR_PHYSIOLOGY	Details ...	81	-0.426227	-1.89491	0	0.0106718	1	784	tags=36%, list=16%, signal=42%
CUI_DEVELOPING_HEART_5TH_WEEK_ATRIAL_CARDIOMYOCYTE	CUI_DEVELOPING_HEART_5TH_WEEK_ATRIAL_CARDIOMYOCYTE	Details ...	18	-0.548957	-1.89484	0	0.0107044	1	488	tags=50%, list=10%, signal=55%
GSE45365_WT_VS_IFNAR_KO_CD11B_DC_MCMV_INFECTION_DN	GSE45365_WT_VS_IFNAR_KO_CD11B_DC_MCMV_INFECTION_DN	Details ...	47	-0.453008	-1.8948	0	0.0106952	1	748	tags=36%, list=15%, signal=42%
GSE17721_0.5H_VS_4H_CPG_BMDC_DN	GSE17721_0.5H_VS_4H_CPG_BMDC_DN	Details ...	52	-0.482812	-1.89398	0	0.0107687	1	650	tags=37%, list=13%, signal=42%
GSE45365_NK_CELL_VS_BCELL_MCMV_INFECTION_DN	GSE45365_NK_CELL_VS_BCELL_MCMV_INFECTION_DN	Details ...	45	-0.479622	-1.89363	0	0.0108009	1	902	tags=42%, list=18%, signal=51%
GSE15330_HSC_VS_MEGAKARYOCYTE_ERYTHROID_PROGENITOR_IKAROS_KO_UP	GSE15330_HSC_VS_MEGAKARYOCYTE_ERYTHROID_PROGENITOR_IKAROS_KO_UP	Details ...	67	-0.422917	-1.89337	0	0.0108122	1	1640	tags=64%, list=34%, signal=95%
BERENJENO_ROCK_SIGNALING_NOT_VIA_RHOA_DN	BERENJENO_ROCK_SIGNALING_NOT_VIA_RHOA_DN	Details ...	24	-0.58165	-1.8931	0	0.0108133	1	1447	tags=71%, list=30%, signal=100%
HAY_BONE_MARROW_IMMATURE_NEUTROPHIL	HAY_BONE_MARROW_IMMATURE_NEUTROPHIL	Details ...	66	-0.443078	-1.89291	0	0.010835	1	1484	tags=68%, list=30%, signal=97%
GOBP_PATHWAY_RESTRICTED_SMAD_PROTEIN_PHOSPHORYLATION	GOBP_PATHWAY_RESTRICTED_SMAD_PROTEIN_PHOSPHORYLATION	Details ...	15	-0.59812	-1.89232	0	0.0109496	1	698	tags=67%, list=14%, signal=78%
MARSON_FOXP3_TARGETS_UP	MARSON_FOXP3_TARGETS_UP	Details ...	24	-0.522585	-1.89166	0	0.0109928	1	881	tags=50%, list=18%, signal=61%
GSE2826_WT_VS_BTK_KO_BCELL_DN	GSE2826_WT_VS_BTK_KO_BCELL_DN	Details ...	62	-0.448172	-1.89098	0	0.011096	1	900	tags=45%, list=18%, signal=55%
GNF2_MYD88	GNF2_MYD88	Details ...	16	-0.639339	-1.89089	0	0.0110969	1	1231	tags=75%, list=25%, signal=100%
GOBP_CARDIAC_VENTRICLE_DEVELOPMENT	GOBP_CARDIAC_VENTRICLE_DEVELOPMENT	Details ...	29	-0.525621	-1.88892	0	0.0112522	1	1025	tags=62%, list=21%, signal=78%
GSE13485_DAY7_VS_DAY21_YF17D_VACCINE_PBMC_UP	GSE13485_DAY7_VS_DAY21_YF17D_VACCINE_PBMC_UP	Details ...	70	-0.445282	-1.88799	0	0.0113758	1	1374	tags=56%, list=28%, signal=76%
REACTOME_RESPONSE_TO_ELEVATED_PLATELET_CYTOSOLIC_CA2	REACTOME_RESPONSE_TO_ELEVATED_PLATELET_CYTOSOLIC_CA2	Details ...	38	-0.520556	-1.8876	0	0.0114071	1	1168	tags=68%, list=24%, signal=89%
GSE15930_STIM_VS_STIM_AND_TRICHOSTATINA_48H_CD8_T_CELL_UP	GSE15930_STIM_VS_STIM_AND_TRICHOSTATINA_48H_CD8_T_CELL_UP	Details ...	66	-0.439993	-1.88726	0	0.011459	1	959	tags=47%, list=20%, signal=58%
LINDSTEDT_DENDRITIC_CELL_MATURATION_A	LINDSTEDT_DENDRITIC_CELL_MATURATION_A	Details ...	15	-0.640192	-1.88595	0	0.0116737	1	337	tags=40%, list=7%, signal=43%
INGRAM_SHH_TARGETS_DN	INGRAM_SHH_TARGETS_DN	Details ...	24	-0.591989	-1.88594	0	0.0116638	1	544	tags=50%, list=11%, signal=56%
AIZARANI_LIVER_C4_EPCAM_POS_BILE_DUCT_CELLS_1	AIZARANI_LIVER_C4_EPCAM_POS_BILE_DUCT_CELLS_1	Details ...	63	-0.452713	-1.88573	0	0.0116744	1	885	tags=48%, list=18%, signal=57%
GOBP_NEGATIVE_REGULATION_OF_IMMUNE_SYSTEM_PROCESS	GOBP_NEGATIVE_REGULATION_OF_IMMUNE_SYSTEM_PROCESS	Details ...	115	-0.420579	-1.88523	0	0.0117461	1	1017	tags=42%, list=21%, signal=51%
REACTOME_REGULATION_OF_INSULIN_LIKE_GROWTH_FACTOR_IGF_TRANSPORT_AND_UPTAKE_BY_INSULIN_LIKE_GROWTH_FACTOR_BINDING_PROTEINS_IGFBPS	REACTOME_REGULATION_OF_INSULIN_LIKE_GROWTH_FACTOR_IGF_TRANSPORT_AND_UPTAKE_BY_INSULIN_LIKE_GROWTH_FACTOR_BINDING_PROTEINS_IGFBPS	Details ...	34	-0.490823	-1.88468	0	0.0118281	1	868	tags=56%, list=18%, signal=67%
GSE3920_IFNA_VS_IFNB_TREATED_ENDOTHELIAL_CELL_DN	GSE3920_IFNA_VS_IFNB_TREATED_ENDOTHELIAL_CELL_DN	Details ...	41	-0.477958	-1.88364	0	0.0119707	1	1199	tags=59%, list=25%, signal=77%
SCHAEFFER_PROSTATE_DEVELOPMENT_48HR_DN	SCHAEFFER_PROSTATE_DEVELOPMENT_48HR_DN	Details ...	111	-0.408817	-1.88327	0	0.0119912	1	618	tags=36%, list=13%, signal=40%
GSE8868_SPLEEN_VS_INTESTINE_CD11B_POS_CD11C_NEG_DC_DN	GSE8868_SPLEEN_VS_INTESTINE_CD11B_POS_CD11C_NEG_DC_DN	Details ...	59	-0.447571	-1.88218	0	0.0121638	1	1717	tags=64%, list=35%, signal=98%
HUPER_BREAST_BASAL_VS_LUMINAL_DN	HUPER_BREAST_BASAL_VS_LUMINAL_DN	Details ...	21	-0.555347	-1.88205	0	0.0121636	1	882	tags=67%, list=18%, signal=81%
GSE22601_IMMATURE_CD4_SINGLE_POSITIVE_VS_CD8_SINGLE_POSITIVE_THYMOCYTE_DN	GSE22601_IMMATURE_CD4_SINGLE_POSITIVE_VS_CD8_SINGLE_POSITIVE_THYMOCYTE_DN	Details ...	73	-0.437307	-1.88149	0	0.0122346	1	1136	tags=52%, list=23%, signal=67%
GOBP_PLATELET_DEGRANULATION	GOBP_PLATELET_DEGRANULATION	Details ...	36	-0.508018	-1.88143	0	0.0122345	1	1168	tags=69%, list=24%, signal=91%
HP_CONGESTIVE_HEART_FAILURE	HP_CONGESTIVE_HEART_FAILURE	Details ...	56	-0.460145	-1.88136	0	0.0122242	1	906	tags=41%, list=19%, signal=50%
GOBP_BONE_DEVELOPMENT	GOBP_BONE_DEVELOPMENT	Details ...	55	-0.460941	-1.88068	0	0.0123048	1	659	tags=33%, list=13%, signal=37%
GSE17721_LPS_VS_PAM3CSK4_24H_BMDC_UP	GSE17721_LPS_VS_PAM3CSK4_24H_BMDC_UP	Details ...	69	-0.430105	-1.8802	0	0.0123245	1	723	tags=29%, list=15%, signal=34%
GOCC_CELL_CELL_JUNCTION	GOCC_CELL_CELL_JUNCTION	Details ...	155	-0.393685	-1.88001	0	0.0123242	1	1167	tags=45%, list=24%, signal=57%
DAVICIONI_MOLECULAR_ARMS_VS_ERMS_DN	DAVICIONI_MOLECULAR_ARMS_VS_ERMS_DN	Details ...	52	-0.450595	-1.87986	0	0.0123139	1	1095	tags=50%, list=22%, signal=64%
HP_ABNORMAL_PULMONARY_VALVE_PHYSIOLOGY	HP_ABNORMAL_PULMONARY_VALVE_PHYSIOLOGY	Details ...	36	-0.477719	-1.87956	0	0.012344	1	405	tags=25%, list=8%, signal=27%
GSE14000_UNSTIM_VS_4H_LPS_DC_TRANSLATED_RNA_DN	GSE14000_UNSTIM_VS_4H_LPS_DC_TRANSLATED_RNA_DN	Details ...	52	-0.480067	-1.87951	0	0.0123337	1	1365	tags=62%, list=28%, signal=84%
GSE15330_WT_VS_IKAROS_KO_GRANULOCYTE_MONOCYTE_PROGENITOR_DN	GSE15330_WT_VS_IKAROS_KO_GRANULOCYTE_MONOCYTE_PROGENITOR_DN	Details ...	62	-0.437767	-1.87946	0	0.0123335	1	1736	tags=73%, list=36%, signal=111%
MODULE_27	MODULE_27	Details ...	86	-0.442659	-1.87928	0	0.0123533	1	814	tags=50%, list=17%, signal=59%
GSE29949_DC_BRAIN_VS_MONOCYTE_BONE_MARROW_UP	GSE29949_DC_BRAIN_VS_MONOCYTE_BONE_MARROW_UP	Details ...	67	-0.432026	-1.87922	0	0.012343	1	1172	tags=48%, list=24%, signal=62%
HATADA_METHYLATED_IN_LUNG_CANCER_UP	HATADA_METHYLATED_IN_LUNG_CANCER_UP	Details ...	75	-0.42542	-1.87908	0	0.0123428	1	621	tags=29%, list=13%, signal=33%
HP_JOINT_LAXITY	HP_JOINT_LAXITY	Details ...	66	-0.440455	-1.87906	0	0.0123426	1	847	tags=35%, list=17%, signal=42%
HINATA_NFKB_TARGETS_FIBROBLAST_UP	HINATA_NFKB_TARGETS_FIBROBLAST_UP	Details ...	28	-0.526779	-1.87896	0	0.0123323	1	1183	tags=68%, list=24%, signal=89%
GOBP_EYE_MORPHOGENESIS	GOBP_EYE_MORPHOGENESIS	Details ...	39	-0.493842	-1.8783	0	0.0123922	1	608	tags=46%, list=12%, signal=52%
PGF_UP.V1_UP	PGF_UP.V1_UP	Details ...	53	-0.456639	-1.87826	0	0.0123819	1	1695	tags=64%, list=35%, signal=97%
MANNO_MIDBRAIN_NEUROTYPES_HMGL	MANNO_MIDBRAIN_NEUROTYPES_HMGL	Details ...	164	-0.390618	-1.87768	0	0.0124617	1	1279	tags=52%, list=26%, signal=69%
GOBP_REGULATION_OF_MONONUCLEAR_CELL_MIGRATION	GOBP_REGULATION_OF_MONONUCLEAR_CELL_MIGRATION	Details ...	29	-0.541587	-1.87733	0	0.012491	1	417	tags=34%, list=9%, signal=37%
HP_ABNORMALITY_OF_BLADDER_MORPHOLOGY	HP_ABNORMALITY_OF_BLADDER_MORPHOLOGY	Details ...	21	-0.593145	-1.87729	0	0.0124807	1	504	tags=48%, list=10%, signal=53%
GOBP_REGULATION_OF_VASOCONSTRICTION	GOBP_REGULATION_OF_VASOCONSTRICTION	Details ...	17	-0.658332	-1.87709	0	0.0124903	1	430	tags=53%, list=9%, signal=58%
TRAVAGLINI_LUNG_CAPILLARY_INTERMEDIATE_2_CELL	TRAVAGLINI_LUNG_CAPILLARY_INTERMEDIATE_2_CELL	Details ...	119	-0.420717	-1.8765	0	0.0125395	1	1319	tags=47%, list=27%, signal=63%
BEGUM_TARGETS_OF_PAX3_FOXO1_FUSION_UP	BEGUM_TARGETS_OF_PAX3_FOXO1_FUSION_UP	Details ...	24	-0.560597	-1.87639	0	0.0125291	1	540	tags=50%, list=11%, signal=56%
MODULE_345	MODULE_345	Details ...	25	-0.577093	-1.87606	0	0.0125887	1	1052	tags=68%, list=22%, signal=86%
ATF2_S_UP.V1_DN	ATF2_S_UP.V1_DN	Details ...	57	-0.456548	-1.87589	0	0.0126081	1	814	tags=44%, list=17%, signal=52%
GOBP_POSITIVE_REGULATION_OF_LYMPHOCYTE_DIFFERENTIATION	GOBP_POSITIVE_REGULATION_OF_LYMPHOCYTE_DIFFERENTIATION	Details ...	27	-0.54609	-1.87573	0	0.0126076	1	756	tags=44%, list=15%, signal=52%
GOBP_NEGATIVE_REGULATION_OF_CELL_SUBSTRATE_ADHESION	GOBP_NEGATIVE_REGULATION_OF_CELL_SUBSTRATE_ADHESION	Details ...	22	-0.549904	-1.87545	0	0.0126371	1	617	tags=41%, list=13%, signal=47%
LEONARD_HYPOXIA	LEONARD_HYPOXIA	Details ...	17	-0.630654	-1.87534	0	0.0126466	1	830	tags=59%, list=17%, signal=71%
GSE41176_UNSTIM_VS_ANTI_IGM_STIM_BCELL_3H_UP	GSE41176_UNSTIM_VS_ANTI_IGM_STIM_BCELL_3H_UP	Details ...	43	-0.47261	-1.87511	0	0.0126859	1	873	tags=47%, list=18%, signal=56%
GSE22886_TH1_VS_TH2_48H_ACT_DN	GSE22886_TH1_VS_TH2_48H_ACT_DN	Details ...	54	-0.461485	-1.87472	0	0.0127053	1	1981	tags=83%, list=41%, signal=139%
KERLEY_RESPONSE_TO_CISPLATIN_UP	KERLEY_RESPONSE_TO_CISPLATIN_UP	Details ...	18	-0.600484	-1.87461	0	0.0127048	1	1445	tags=83%, list=30%, signal=118%
AMIT_SERUM_RESPONSE_60_MCF10A	AMIT_SERUM_RESPONSE_60_MCF10A	Details ...	21	-0.585253	-1.87443	0	0.0127043	1	861	tags=62%, list=18%, signal=75%
ROY_WOUND_BLOOD_VESSEL_UP	ROY_WOUND_BLOOD_VESSEL_UP	Details ...	24	-0.532119	-1.87404	0	0.0127234	1	843	tags=50%, list=17%, signal=60%
GSE9037_WT_VS_IRAK4_KO_BMDM_UP	GSE9037_WT_VS_IRAK4_KO_BMDM_UP	Details ...	73	-0.463426	-1.87403	0	0.012713	1	796	tags=36%, list=16%, signal=42%
GOBP_LEUKOCYTE_CHEMOTAXIS	GOBP_LEUKOCYTE_CHEMOTAXIS	Details ...	48	-0.491241	-1.87381	0	0.0127125	1	928	tags=46%, list=19%, signal=56%
GSE9509_LPS_VS_LPS_AND_IL10_STIM_IL10_KO_MACROPHAGE_20MIN_UP	GSE9509_LPS_VS_LPS_AND_IL10_STIM_IL10_KO_MACROPHAGE_20MIN_UP	Details ...	37	-0.492693	-1.87378	0	0.0127021	1	1279	tags=62%, list=26%, signal=84%
GOBP_POSITIVE_REGULATION_OF_SIGNALING	GOBP_POSITIVE_REGULATION_OF_SIGNALING	Details ...	450	-0.335119	-1.87351	0	0.0127016	1	673	tags=25%, list=14%, signal=27%
BOYLAN_MULTIPLE_MYELOMA_PCA1_UP	BOYLAN_MULTIPLE_MYELOMA_PCA1_UP	Details ...	30	-0.552498	-1.87348	0	0.0126913	1	877	tags=53%, list=18%, signal=65%
GOCC_PLATELET_ALPHA_GRANULE_LUMEN	GOCC_PLATELET_ALPHA_GRANULE_LUMEN	Details ...	19	-0.604351	-1.87315	0	0.0127593	1	753	tags=63%, list=15%, signal=74%
TRAVAGLINI_LUNG_BRONCHIAL_VESSEL_2_CELL	TRAVAGLINI_LUNG_BRONCHIAL_VESSEL_2_CELL	Details ...	109	-0.409432	-1.87306	0	0.0127881	1	1165	tags=47%, list=24%, signal=60%
HP_DYSPNEA	HP_DYSPNEA	Details ...	104	-0.406749	-1.87287	0	0.0127777	1	504	tags=22%, list=10%, signal=24%
GSE25088_IL4_VS_IL4_AND_ROSIGLITAZONE_STIM_STAT6_KO_MACROPHAGE_DAY10_DN	GSE25088_IL4_VS_IL4_AND_ROSIGLITAZONE_STIM_STAT6_KO_MACROPHAGE_DAY10_DN	Details ...	58	-0.454853	-1.87251	0	0.0127967	1	1430	tags=59%, list=29%, signal=82%
GOBP_MESENCHYME_DEVELOPMENT	GOBP_MESENCHYME_DEVELOPMENT	Details ...	75	-0.448581	-1.8724	0	0.0127863	1	1422	tags=65%, list=29%, signal=91%
HP_MACULE	HP_MACULE	Details ...	23	-0.584672	-1.87191	0	0.0128149	1	652	tags=39%, list=13%, signal=45%
GSE3982_MAST_CELL_VS_BASOPHIL_DN	GSE3982_MAST_CELL_VS_BASOPHIL_DN	Details ...	47	-0.472126	-1.87159	0	0.0128435	1	1072	tags=51%, list=22%, signal=65%
GOBP_REGULATION_OF_CELL_JUNCTION_ASSEMBLY	GOBP_REGULATION_OF_CELL_JUNCTION_ASSEMBLY	Details ...	73	-0.402742	-1.86905	0	0.0132237	1	892	tags=42%, list=18%, signal=51%
GOBP_PLASMA_MEMBRANE_ORGANIZATION	GOBP_PLASMA_MEMBRANE_ORGANIZATION	Details ...	36	-0.517325	-1.86894	0	0.013213	1	959	tags=50%, list=20%, signal=62%
ZWANG_EGF_INTERVAL_DN	ZWANG_EGF_INTERVAL_DN	Details ...	55	-0.45205	-1.86892	0	0.0132023	1	803	tags=35%, list=16%, signal=41%
WP_P53_TRANSCRIPTIONAL_GENE_NETWORK	WP_P53_TRANSCRIPTIONAL_GENE_NETWORK	Details ...	28	-0.508775	-1.86799	0	0.0133474	1	1268	tags=68%, list=26%, signal=91%
DURANTE_ADULT_OLFACTORY_NEUROEPITHELIUM_NK_CELLS	DURANTE_ADULT_OLFACTORY_NEUROEPITHELIUM_NK_CELLS	Details ...	18	-0.605171	-1.8675	0	0.0134047	1	723	tags=50%, list=15%, signal=58%
CAIRO_LIVER_DEVELOPMENT_UP	CAIRO_LIVER_DEVELOPMENT_UP	Details ...	47	-0.474672	-1.86722	0	0.0134427	1	976	tags=45%, list=20%, signal=55%
LEE_METASTASIS_AND_ALTERNATIVE_SPLICING_UP	LEE_METASTASIS_AND_ALTERNATIVE_SPLICING_UP	Details ...	32	-0.505634	-1.86627	0	0.0135875	1	1312	tags=63%, list=27%, signal=85%
GSE20754_WT_VS_TCF1_KO_MEMORY_CD8_TCELL_UP	GSE20754_WT_VS_TCF1_KO_MEMORY_CD8_TCELL_UP	Details ...	50	-0.450876	-1.86604	0	0.0136349	1	985	tags=46%, list=20%, signal=57%
GSE2405_0H_VS_1.5H_A_PHAGOCYTOPHILUM_STIM_NEUTROPHIL_UP	GSE2405_0H_VS_1.5H_A_PHAGOCYTOPHILUM_STIM_NEUTROPHIL_UP	Details ...	66	-0.436286	-1.86599	0	0.0136239	1	911	tags=45%, list=19%, signal=55%
DOANE_RESPONSE_TO_ANDROGEN_DN	DOANE_RESPONSE_TO_ANDROGEN_DN	Details ...	87	-0.421818	-1.86563	0	0.0136419	1	520	tags=26%, list=11%, signal=29%
GOCC_AZUROPHIL_GRANULE	GOCC_AZUROPHIL_GRANULE	Details ...	40	-0.480735	-1.86541	0	0.013631	1	1996	tags=80%, list=41%, signal=134%
GSE19923_E2A_KO_VS_E2A_AND_HEB_KO_DP_THYMOCYTE_DN	GSE19923_E2A_KO_VS_E2A_AND_HEB_KO_DP_THYMOCYTE_DN	Details ...	53	-0.460639	-1.86534	0	0.0136394	1	1124	tags=49%, list=23%, signal=63%
LAKE_ADULT_KIDNEY_C4_PROXIMAL_TUBULE_EPITHELIAL_CELLS_S2	LAKE_ADULT_KIDNEY_C4_PROXIMAL_TUBULE_EPITHELIAL_CELLS_S2	Details ...	50	-0.468644	-1.86524	0	0.0136478	1	1160	tags=52%, list=24%, signal=67%
GOBP_RESPONSE_TO_BMP	GOBP_RESPONSE_TO_BMP	Details ...	44	-0.475867	-1.86498	0	0.0136948	1	1056	tags=59%, list=22%, signal=75%
GOBP_VIRAL_LIFE_CYCLE	GOBP_VIRAL_LIFE_CYCLE	Details ...	84	-0.414359	-1.86412	0	0.0137988	1	1268	tags=45%, list=26%, signal=60%
MIR4793_5P	MIR4793_5P	Details ...	16	-0.607883	-1.86336	0	0.0138348	1	1070	tags=63%, list=22%, signal=80%
GOBP_SMOOTH_MUSCLE_CONTRACTION	GOBP_SMOOTH_MUSCLE_CONTRACTION	Details ...	24	-0.562909	-1.86282	0	0.0139101	1	504	tags=42%, list=10%, signal=46%
BARIS_THYROID_CANCER_DN	BARIS_THYROID_CANCER_DN	Details ...	25	-0.553002	-1.86274	0	0.0139086	1	629	tags=40%, list=13%, signal=46%
GSE21360_NAIVE_VS_QUATERNARY_MEMORY_CD8_TCELL_DN	GSE21360_NAIVE_VS_QUATERNARY_MEMORY_CD8_TCELL_DN	Details ...	59	-0.445621	-1.86135	0	0.0142049	1	1423	tags=54%, list=29%, signal=76%
GSE5589_WT_VS_IL6_KO_LPS_AND_IL6_STIM_MACROPHAGE_45MIN_DN	GSE5589_WT_VS_IL6_KO_LPS_AND_IL6_STIM_MACROPHAGE_45MIN_DN	Details ...	57	-0.474075	-1.86117	0	0.0142032	1	862	tags=39%, list=18%, signal=46%
GSE19401_UNSTIM_VS_RETINOIC_ACID_AND_PAM2CSK4_STIM_FOLLICULAR_DC_DN	GSE19401_UNSTIM_VS_RETINOIC_ACID_AND_PAM2CSK4_STIM_FOLLICULAR_DC_DN	Details ...	62	-0.436745	-1.86089	0	0.0142684	1	1187	tags=52%, list=24%, signal=67%
MILI_PSEUDOPODIA_HAPTOTAXIS_DN	MILI_PSEUDOPODIA_HAPTOTAXIS_DN	Details ...	232	-0.362688	-1.86082	0	0.0142571	1	1671	tags=52%, list=34%, signal=76%
MIYAGAWA_TARGETS_OF_EWSR1_ETS_FUSIONS_UP	MIYAGAWA_TARGETS_OF_EWSR1_ETS_FUSIONS_UP	Details ...	82	-0.430354	-1.86078	0	0.0142553	1	1003	tags=46%, list=21%, signal=57%
GSE1432_1H_VS_24H_IFNG_MICROGLIA_UP	GSE1432_1H_VS_24H_IFNG_MICROGLIA_UP	Details ...	66	-0.429227	-1.86029	0	0.0143688	1	1219	tags=53%, list=25%, signal=70%
ICHIBA_GRAFT_VERSUS_HOST_DISEASE_D7_UP	ICHIBA_GRAFT_VERSUS_HOST_DISEASE_D7_UP	Details ...	32	-0.51685	-1.86017	0	0.0143766	1	1382	tags=72%, list=28%, signal=100%
ODONNELL_TFRC_TARGETS_UP	ODONNELL_TFRC_TARGETS_UP	Details ...	93	-0.402245	-1.85917	0	0.0144873	1	903	tags=42%, list=18%, signal=50%
GOBP_RESPONSE_TO_MOLECULE_OF_BACTERIAL_ORIGIN	GOBP_RESPONSE_TO_MOLECULE_OF_BACTERIAL_ORIGIN	Details ...	89	-0.426299	-1.85876	0	0.0145406	1	1035	tags=42%, list=21%, signal=52%
WELCSH_BRCA1_TARGETS_UP	WELCSH_BRCA1_TARGETS_UP	Details ...	56	-0.448619	-1.85863	0	0.014548	1	1700	tags=63%, list=35%, signal=95%
GOMF_GROWTH_FACTOR_RECEPTOR_BINDING	GOMF_GROWTH_FACTOR_RECEPTOR_BINDING	Details ...	39	-0.51172	-1.85758	0	0.0146318	1	848	tags=46%, list=17%, signal=55%
GSE18791_UNSTIM_VS_NEWCATSLE_VIRUS_DC_18H_DN	GSE18791_UNSTIM_VS_NEWCATSLE_VIRUS_DC_18H_DN	Details ...	51	-0.474852	-1.85738	0	0.0146679	1	628	tags=41%, list=13%, signal=47%
BURTON_ADIPOGENESIS_9	BURTON_ADIPOGENESIS_9	Details ...	37	-0.521103	-1.85707	0	0.0146942	1	884	tags=54%, list=18%, signal=65%
GSE43955_1H_VS_60H_ACT_CD4_TCELL_DN	GSE43955_1H_VS_60H_ACT_CD4_TCELL_DN	Details ...	62	-0.443535	-1.85661	0	0.0147205	1	781	tags=34%, list=16%, signal=40%
GSE7852_LN_VS_FAT_TREG_DN	GSE7852_LN_VS_FAT_TREG_DN	Details ...	67	-0.451541	-1.85645	0	0.0147468	1	1421	tags=64%, list=29%, signal=89%
GSE2405_S_AUREUS_VS_A_PHAGOCYTOPHILUM_NEUTROPHIL_UP	GSE2405_S_AUREUS_VS_A_PHAGOCYTOPHILUM_NEUTROPHIL_UP	Details ...	52	-0.468892	-1.85618	0	0.0147732	1	756	tags=46%, list=15%, signal=54%
CUI_DEVELOPING_HEART_TRABECULAR_VENTRICULAR_CARDIOMYOCYTE	CUI_DEVELOPING_HEART_TRABECULAR_VENTRICULAR_CARDIOMYOCYTE	Details ...	35	-0.488519	-1.85617	0	0.014771	1	647	tags=37%, list=13%, signal=43%
BASAKI_YBX1_TARGETS_UP	BASAKI_YBX1_TARGETS_UP	Details ...	128	-0.388153	-1.85565	0	0.0148828	1	900	tags=27%, list=18%, signal=33%
GSE24142_DN2_VS_DN3_THYMOCYTE_ADULT_UP	GSE24142_DN2_VS_DN3_THYMOCYTE_ADULT_UP	Details ...	65	-0.434313	-1.85562	0	0.0148711	1	926	tags=43%, list=19%, signal=52%
NATSUME_RESPONSE_TO_INTERFERON_BETA_DN	NATSUME_RESPONSE_TO_INTERFERON_BETA_DN	Details ...	20	-0.563779	-1.85553	0	0.0148594	1	910	tags=50%, list=19%, signal=61%
HOWLIN_PUBERTAL_MAMMARY_GLAND	HOWLIN_PUBERTAL_MAMMARY_GLAND	Details ...	20	-0.574597	-1.85524	0	0.0148952	1	510	tags=45%, list=10%, signal=50%
GSE33292_WT_VS_TCF1_KO_DN3_THYMOCYTE_UP	GSE33292_WT_VS_TCF1_KO_DN3_THYMOCYTE_UP	Details ...	51	-0.436358	-1.85497	0	0.0149497	1	1018	tags=53%, list=21%, signal=66%
GOCC_PHAGOCYTIC_VESICLE	GOCC_PHAGOCYTIC_VESICLE	Details ...	37	-0.503052	-1.85478	0	0.0149755	1	1510	tags=73%, list=31%, signal=105%
KEGG_RENAL_CELL_CARCINOMA	KEGG_RENAL_CELL_CARCINOMA	Details ...	18	-0.556107	-1.85465	0	0.0150015	1	1396	tags=61%, list=29%, signal=85%
GOMF_CELL_ADHESION_MEDIATOR_ACTIVITY	GOMF_CELL_ADHESION_MEDIATOR_ACTIVITY	Details ...	21	-0.56783	-1.85446	0	0.0150181	1	665	tags=43%, list=14%, signal=49%
GOBP_NEGATIVE_REGULATION_OF_IMMUNE_EFFECTOR_PROCESS	GOBP_NEGATIVE_REGULATION_OF_IMMUNE_EFFECTOR_PROCESS	Details ...	33	-0.511096	-1.85441	0	0.0150064	1	884	tags=58%, list=18%, signal=70%
OSWALD_HEMATOPOIETIC_STEM_CELL_IN_COLLAGEN_GEL_DN	OSWALD_HEMATOPOIETIC_STEM_CELL_IN_COLLAGEN_GEL_DN	Details ...	78	-0.403862	-1.85392	0	0.0151261	1	939	tags=38%, list=19%, signal=47%
GSE15930_STIM_VS_STIM_AND_IL12_48H_CD8_T_CELL_DN	GSE15930_STIM_VS_STIM_AND_IL12_48H_CD8_T_CELL_DN	Details ...	71	-0.436707	-1.85319	0	0.0152367	1	918	tags=42%, list=19%, signal=51%
GSE21360_SECONDARY_VS_QUATERNARY_MEMORY_CD8_TCELL_UP	GSE21360_SECONDARY_VS_QUATERNARY_MEMORY_CD8_TCELL_UP	Details ...	56	-0.453158	-1.85315	0	0.0152249	1	1035	tags=50%, list=21%, signal=63%
HP_MISALIGNMENT_OF_TEETH	HP_MISALIGNMENT_OF_TEETH	Details ...	76	-0.404669	-1.85278	0	0.0152601	1	415	tags=20%, list=8%, signal=21%
MODULE_60	MODULE_60	Details ...	114	-0.385098	-1.85272	0	0.0152856	1	998	tags=42%, list=20%, signal=52%
GSE24634_TEFF_VS_TCONV_DAY10_IN_CULTURE_DN	GSE24634_TEFF_VS_TCONV_DAY10_IN_CULTURE_DN	Details ...	63	-0.448994	-1.85269	0	0.0152738	1	1650	tags=71%, list=34%, signal=106%
MODULE_111	MODULE_111	Details ...	34	-0.476388	-1.8525	0	0.0152806	1	789	tags=44%, list=16%, signal=52%
HP_FLEXION_CONTRACTURE_OF_DIGIT	HP_FLEXION_CONTRACTURE_OF_DIGIT	Details ...	80	-0.426884	-1.8524	0	0.0152874	1	689	tags=31%, list=14%, signal=36%
HP_SKIN_NODULE	HP_SKIN_NODULE	Details ...	34	-0.542517	-1.85224	0	0.0152943	1	814	tags=50%, list=17%, signal=60%
GSE10325_LUPUS_BCELL_VS_LUPUS_MYELOID_DN	GSE10325_LUPUS_BCELL_VS_LUPUS_MYELOID_DN	Details ...	66	-0.436493	-1.8517	0	0.0153573	1	1650	tags=64%, list=34%, signal=95%
GSE22935_WT_VS_MYD88_KO_MACROPHAGE_UP	GSE22935_WT_VS_MYD88_KO_MACROPHAGE_UP	Details ...	57	-0.471998	-1.85169	0	0.0153454	1	1415	tags=60%, list=29%, signal=83%
GSE15659_CD45RA_NEG_CD4_TCELL_VS_NONSUPPRESSIVE_TCELL_DN	GSE15659_CD45RA_NEG_CD4_TCELL_VS_NONSUPPRESSIVE_TCELL_DN	Details ...	42	-0.473343	-1.85166	0	0.0153429	1	950	tags=43%, list=19%, signal=53%
GSE7852_THYMUS_VS_FAT_TCONV_DN	GSE7852_THYMUS_VS_FAT_TCONV_DN	Details ...	61	-0.461561	-1.85165	0	0.015331	1	1143	tags=57%, list=23%, signal=74%
HP_LOCALIZED_SKIN_LESION	HP_LOCALIZED_SKIN_LESION	Details ...	206	-0.36704	-1.85138	0	0.0153472	1	847	tags=29%, list=17%, signal=34%
GSE35543_IN_VITRO_ITREG_VS_CONVERTED_EX_ITREG_DN	GSE35543_IN_VITRO_ITREG_VS_CONVERTED_EX_ITREG_DN	Details ...	58	-0.429108	-1.85092	0	0.015419	1	681	tags=34%, list=14%, signal=40%
GOMF_HEPARIN_BINDING	GOMF_HEPARIN_BINDING	Details ...	43	-0.478513	-1.85031	0	0.0154628	1	599	tags=49%, list=12%, signal=55%
GOBP_INOSITOL_PHOSPHATE_MEDIATED_SIGNALING	GOBP_INOSITOL_PHOSPHATE_MEDIATED_SIGNALING	Details ...	20	-0.540158	-1.84977	0	0.0154974	1	1242	tags=55%, list=25%, signal=73%
GOBP_RESPONSE_TO_ENDOGENOUS_STIMULUS	GOBP_RESPONSE_TO_ENDOGENOUS_STIMULUS	Details ...	427	-0.336245	-1.84949	0	0.0155041	1	1020	tags=34%, list=21%, signal=39%
HP_ERYTHEMA	HP_ERYTHEMA	Details ...	30	-0.523803	-1.84798	0	0.0157335	1	653	tags=37%, list=13%, signal=42%
GSE39556_CD8A_DC_VS_NK_CELL_DN	GSE39556_CD8A_DC_VS_NK_CELL_DN	Details ...	50	-0.450497	-1.84798	0	0.0157215	1	947	tags=46%, list=19%, signal=56%
GOBP_HOMOTYPIC_CELL_CELL_ADHESION	GOBP_HOMOTYPIC_CELL_CELL_ADHESION	Details ...	27	-0.559133	-1.84717	0	0.0158299	1	1234	tags=67%, list=25%, signal=89%
LI_WILMS_TUMOR_VS_FETAL_KIDNEY_2_DN	LI_WILMS_TUMOR_VS_FETAL_KIDNEY_2_DN	Details ...	23	-0.560726	-1.84638	0	0.0160029	1	709	tags=61%, list=15%, signal=71%
GSE29618_BCELL_VS_MDC_DAY7_FLU_VACCINE_DN	GSE29618_BCELL_VS_MDC_DAY7_FLU_VACCINE_DN	Details ...	58	-0.460789	-1.8459	0	0.0160459	1	1158	tags=59%, list=24%, signal=76%
GSE41176_UNSTIM_VS_ANTI_IGM_STIM_BCELL_1H_DN	GSE41176_UNSTIM_VS_ANTI_IGM_STIM_BCELL_1H_DN	Details ...	54	-0.437131	-1.84577	0	0.0160521	1	1213	tags=46%, list=25%, signal=61%
HP_APLASIA_HYPOPLASIA_OF_THE_SKIN	HP_APLASIA_HYPOPLASIA_OF_THE_SKIN	Details ...	58	-0.47334	-1.8456	0	0.0160491	1	461	tags=28%, list=9%, signal=30%
GSE22527_ANTI_CD3_INVIVO_VS_UNTREATED_MOUSE_TREG_UP	GSE22527_ANTI_CD3_INVIVO_VS_UNTREATED_MOUSE_TREG_UP	Details ...	47	-0.470378	-1.84548	0	0.0160645	1	846	tags=40%, list=17%, signal=48%
GOBP_REGULATION_OF_ANATOMICAL_STRUCTURE_SIZE	GOBP_REGULATION_OF_ANATOMICAL_STRUCTURE_SIZE	Details ...	143	-0.380098	-1.84474	0	0.016132	1	1162	tags=44%, list=24%, signal=56%
GOBP_MYELOID_LEUKOCYTE_DIFFERENTIATION	GOBP_MYELOID_LEUKOCYTE_DIFFERENTIATION	Details ...	56	-0.438359	-1.84397	0	0.0162393	1	1131	tags=48%, list=23%, signal=62%
GARGALOVIC_RESPONSE_TO_OXIDIZED_PHOSPHOLIPIDS_BLUE_UP	GARGALOVIC_RESPONSE_TO_OXIDIZED_PHOSPHOLIPIDS_BLUE_UP	Details ...	44	-0.491458	-1.84382	0	0.0162361	1	1484	tags=66%, list=30%, signal=94%
GOBP_TYROSINE_PHOSPHORYLATION_OF_STAT_PROTEIN	GOBP_TYROSINE_PHOSPHORYLATION_OF_STAT_PROTEIN	Details ...	20	-0.565259	-1.84369	0	0.0162879	1	1233	tags=60%, list=25%, signal=80%
GSE37301_HEMATOPOIETIC_STEM_CELL_VS_PRO_BCELL_UP	GSE37301_HEMATOPOIETIC_STEM_CELL_VS_PRO_BCELL_UP	Details ...	54	-0.45173	-1.84322	0	0.016349	1	1100	tags=50%, list=23%, signal=64%
RODRIGUES_THYROID_CARCINOMA_POORLY_DIFFERENTIATED_DN	RODRIGUES_THYROID_CARCINOMA_POORLY_DIFFERENTIATED_DN	Details ...	232	-0.358024	-1.84277	0	0.0164006	1	1132	tags=38%, list=23%, signal=48%
CHYLA_CBFA2T3_TARGETS_UP	CHYLA_CBFA2T3_TARGETS_UP	Details ...	82	-0.414971	-1.84214	0	0.0165075	1	979	tags=46%, list=20%, signal=57%
GSE5542_UNTREATED_VS_IFNA_AND_IFNG_TREATED_EPITHELIAL_CELLS_6H_DN	GSE5542_UNTREATED_VS_IFNA_AND_IFNG_TREATED_EPITHELIAL_CELLS_6H_DN	Details ...	67	-0.405372	-1.84179	0	0.0165778	1	1103	tags=45%, list=23%, signal=57%
GNF2_CD53	GNF2_CD53	Details ...	19	-0.604808	-1.84145	0	0.01662	1	770	tags=58%, list=16%, signal=68%
MODULE_399	MODULE_399	Details ...	15	-0.582364	-1.84086	0	0.0167045	1	1609	tags=80%, list=33%, signal=119%
REACTOME_CLASS_A_1_RHODOPSIN_LIKE_RECEPTORS	REACTOME_CLASS_A_1_RHODOPSIN_LIKE_RECEPTORS	Details ...	36	-0.53435	-1.84063	0	0.0167432	1	267	tags=33%, list=5%, signal=35%
GSE43863_TFH_VS_LY6C_LOW_CXCR5NEG_EFFECTOR_CD4_TCELL_UP	GSE43863_TFH_VS_LY6C_LOW_CXCR5NEG_EFFECTOR_CD4_TCELL_UP	Details ...	61	-0.463675	-1.84014	0	0.0167579	1	1224	tags=52%, list=25%, signal=69%
MIKKELSEN_ES_ICP_WITH_H3K4ME3	MIKKELSEN_ES_ICP_WITH_H3K4ME3	Details ...	162	-0.377859	-1.83999	0	0.0167726	1	907	tags=35%, list=19%, signal=42%
GSE16385_MONOCYTE_VS_12H_ROSIGLITAZONE_TREATED_MACROPHAGE_UP	GSE16385_MONOCYTE_VS_12H_ROSIGLITAZONE_TREATED_MACROPHAGE_UP	Details ...	45	-0.44263	-1.83979	0	0.0167873	1	790	tags=31%, list=16%, signal=37%
GSE27786_CD8_TCELL_VS_NKCELL_DN	GSE27786_CD8_TCELL_VS_NKCELL_DN	Details ...	56	-0.450918	-1.83977	0	0.0168019	1	906	tags=39%, list=19%, signal=48%
GSE21379_WT_VS_SAP_KO_TFH_CD4_TCELL_UP	GSE21379_WT_VS_SAP_KO_TFH_CD4_TCELL_UP	Details ...	49	-0.461381	-1.83971	0	0.0167982	1	976	tags=49%, list=20%, signal=61%
GOBP_NEGATIVE_REGULATION_OF_CYTOKINE_PRODUCTION	GOBP_NEGATIVE_REGULATION_OF_CYTOKINE_PRODUCTION	Details ...	83	-0.410953	-1.83964	0	0.016813	1	792	tags=37%, list=16%, signal=44%
GSE24142_EARLY_THYMIC_PROGENITOR_VS_DN2_THYMOCYTE_FETAL_UP	GSE24142_EARLY_THYMIC_PROGENITOR_VS_DN2_THYMOCYTE_FETAL_UP	Details ...	50	-0.452663	-1.8389	0	0.0169545	1	1192	tags=58%, list=24%, signal=76%
HALLMARK_APICAL_JUNCTION	HALLMARK_APICAL_JUNCTION	Details ...	77	-0.437245	-1.83874	0	0.0169689	1	843	tags=40%, list=17%, signal=48%
WP_EPITHELIAL_TO_MESENCHYMAL_TRANSITION_IN_COLORECTAL_CANCER	WP_EPITHELIAL_TO_MESENCHYMAL_TRANSITION_IN_COLORECTAL_CANCER	Details ...	45	-0.464392	-1.83857	0	0.0169834	1	753	tags=42%, list=15%, signal=49%
PECE_MAMMARY_STEM_CELL_DN	PECE_MAMMARY_STEM_CELL_DN	Details ...	49	-0.478326	-1.83844	0	0.0169978	1	1387	tags=57%, list=28%, signal=79%
GOBP_RESPONSE_TO_OXYGEN_LEVELS	GOBP_RESPONSE_TO_OXYGEN_LEVELS	Details ...	119	-0.394272	-1.8377	0	0.0170845	1	805	tags=34%, list=16%, signal=39%
JOHNSTONE_PARVB_TARGETS_2_UP	JOHNSTONE_PARVB_TARGETS_2_UP	Details ...	53	-0.460921	-1.83698	0	0.0172219	1	1315	tags=60%, list=27%, signal=82%
WP_LUNG_FIBROSIS	WP_LUNG_FIBROSIS	Details ...	21	-0.565617	-1.8366	0	0.0172723	1	803	tags=57%, list=16%, signal=68%
GSE3982_BASOPHIL_VS_CENT_MEMORY_CD4_TCELL_UP	GSE3982_BASOPHIL_VS_CENT_MEMORY_CD4_TCELL_UP	Details ...	59	-0.414884	-1.83614	0	0.0173046	1	1837	tags=76%, list=38%, signal=121%
HP_OSTEOPENIA	HP_OSTEOPENIA	Details ...	56	-0.436735	-1.83538	0	0.0174274	1	1121	tags=46%, list=23%, signal=60%
GOBP_REGULATION_OF_PEPTIDYL_TYROSINE_PHOSPHORYLATION	GOBP_REGULATION_OF_PEPTIDYL_TYROSINE_PHOSPHORYLATION	Details ...	71	-0.42914	-1.83527	0	0.0174144	1	787	tags=38%, list=16%, signal=45%
GOBP_INOSITOL_LIPID_MEDIATED_SIGNALING	GOBP_INOSITOL_LIPID_MEDIATED_SIGNALING	Details ...	47	-0.470845	-1.83492	0	0.0174555	1	456	tags=28%, list=9%, signal=30%
GSE22025_UNTREATED_VS_PROGESTERONE_TREATED_CD4_TCELL_UP	GSE22025_UNTREATED_VS_PROGESTERONE_TREATED_CD4_TCELL_UP	Details ...	54	-0.438896	-1.83485	0	0.0174696	1	693	tags=35%, list=14%, signal=41%
GSE22140_GERMFREE_VS_SPF_ARTHRITIC_MOUSE_CD4_TCELL_DN	GSE22140_GERMFREE_VS_SPF_ARTHRITIC_MOUSE_CD4_TCELL_DN	Details ...	60	-0.407331	-1.83346	0	0.0177169	1	1149	tags=45%, list=24%, signal=58%
REACTOME_CELL_CELL_COMMUNICATION	REACTOME_CELL_CELL_COMMUNICATION	Details ...	42	-0.465971	-1.83306	0	0.0177756	1	1231	tags=57%, list=25%, signal=76%
HP_ABNORMAL_SYSTEMIC_ARTERIAL_MORPHOLOGY	HP_ABNORMAL_SYSTEMIC_ARTERIAL_MORPHOLOGY	Details ...	112	-0.404352	-1.8326	0	0.0178342	1	652	tags=26%, list=13%, signal=29%
GOBP_PEPTIDYL_TYROSINE_MODIFICATION	GOBP_PEPTIDYL_TYROSINE_MODIFICATION	Details ...	98	-0.39783	-1.83156	0	0.017893	1	1103	tags=45%, list=23%, signal=57%
GSE21063_WT_VS_NFATC1_KO_BCELL_UP	GSE21063_WT_VS_NFATC1_KO_BCELL_UP	Details ...	51	-0.458793	-1.83149	0	0.0178886	1	843	tags=41%, list=17%, signal=49%
WANG_CLIM2_TARGETS_DN	WANG_CLIM2_TARGETS_DN	Details ...	64	-0.421427	-1.83133	0	0.0179112	1	1268	tags=47%, list=26%, signal=62%
TAKEDA_TARGETS_OF_NUP98_HOXA9_FUSION_16D_UP	TAKEDA_TARGETS_OF_NUP98_HOXA9_FUSION_16D_UP	Details ...	46	-0.460354	-1.83062	0	0.0179473	1	657	tags=43%, list=13%, signal=50%
GOBP_REGULATION_OF_MUSCLE_CONTRACTION	GOBP_REGULATION_OF_MUSCLE_CONTRACTION	Details ...	30	-0.517856	-1.83055	0	0.0179517	1	486	tags=33%, list=10%, signal=37%
IL21_UP.V1_UP	IL21_UP.V1_UP	Details ...	38	-0.477195	-1.83025	0	0.0180008	1	683	tags=45%, list=14%, signal=52%
GSE360_L_DONOVANI_VS_B_MALAYI_HIGH_DOSE_DC_UP	GSE360_L_DONOVANI_VS_B_MALAYI_HIGH_DOSE_DC_UP	Details ...	48	-0.462219	-1.82921	0	0.0181305	1	1464	tags=63%, list=30%, signal=88%
WP_PRIMARY_FOCAL_SEGMENTAL_GLOMERULOSCLEROSIS_FSGS	WP_PRIMARY_FOCAL_SEGMENTAL_GLOMERULOSCLEROSIS_FSGS	Details ...	32	-0.522221	-1.8289	0	0.018175	1	1028	tags=53%, list=21%, signal=67%
GOBP_REGULATION_OF_CELL_ADHESION	GOBP_REGULATION_OF_CELL_ADHESION	Details ...	221	-0.368119	-1.82883	0	0.0181706	1	855	tags=36%, list=18%, signal=42%
FEVR_CTNNB1_TARGETS_UP	FEVR_CTNNB1_TARGETS_UP	Details ...	199	-0.376176	-1.82838	0	0.0182193	1	1188	tags=45%, list=24%, signal=57%
CUI_DEVELOPING_HEART_C8_MACROPHAGE	CUI_DEVELOPING_HEART_C8_MACROPHAGE	Details ...	70	-0.433079	-1.82804	0	0.0182503	1	1490	tags=67%, list=31%, signal=95%
GOBP_NEGATIVE_REGULATION_OF_BMP_SIGNALING_PATHWAY	GOBP_NEGATIVE_REGULATION_OF_BMP_SIGNALING_PATHWAY	Details ...	18	-0.615979	-1.82794	0	0.0182636	1	999	tags=72%, list=20%, signal=90%
GOBP_NEGATIVE_REGULATION_OF_IMMUNE_RESPONSE	GOBP_NEGATIVE_REGULATION_OF_IMMUNE_RESPONSE	Details ...	43	-0.462759	-1.82748	0	0.0183077	1	996	tags=51%, list=20%, signal=64%
GOBP_POSITIVE_REGULATION_OF_CELL_GROWTH	GOBP_POSITIVE_REGULATION_OF_CELL_GROWTH	Details ...	41	-0.489958	-1.82746	0	0.0182942	1	648	tags=34%, list=13%, signal=39%
GSE30962_PRIMARY_VS_SECONDARY_CHRONIC_LCMV_INF_CD8_TCELL_DN	GSE30962_PRIMARY_VS_SECONDARY_CHRONIC_LCMV_INF_CD8_TCELL_DN	Details ...	49	-0.46521	-1.82723	0	0.0183342	1	1013	tags=51%, list=21%, signal=64%
SCHERER_PBMC_APSV_WETVAX_AGE_18_40YO_JOINT_TO_VACCINIA_AND_YELLOW_FEVER_UP	SCHERER_PBMC_APSV_WETVAX_AGE_18_40YO_JOINT_TO_VACCINIA_AND_YELLOW_FEVER_UP	Details ...	17	-0.578251	-1.82706	0	0.0183561	1	1052	tags=65%, list=22%, signal=82%
HP_ABNORMALITY_OF_HUMORAL_IMMUNITY	HP_ABNORMALITY_OF_HUMORAL_IMMUNITY	Details ...	67	-0.440031	-1.82619	0	0.0185105	1	784	tags=30%, list=16%, signal=35%
GSE17721_CTRL_VS_LPS_4H_BMDC_DN	GSE17721_CTRL_VS_LPS_4H_BMDC_DN	Details ...	50	-0.470298	-1.8257	0	0.0185983	1	1025	tags=48%, list=21%, signal=60%
REACTOME_HEMOSTASIS	REACTOME_HEMOSTASIS	Details ...	158	-0.365337	-1.82538	0	0.0186463	1	855	tags=35%, list=18%, signal=42%
DAUER_STAT3_TARGETS_UP	DAUER_STAT3_TARGETS_UP	Details ...	22	-0.554657	-1.82532	0	0.0186592	1	845	tags=59%, list=17%, signal=71%
HP_AORTIC_REGURGITATION	HP_AORTIC_REGURGITATION	Details ...	28	-0.514771	-1.82498	0	0.0186631	1	847	tags=46%, list=17%, signal=56%
HP_ABNORMALITY_OF_HAIR_TEXTURE	HP_ABNORMALITY_OF_HAIR_TEXTURE	Details ...	34	-0.489738	-1.82486	0	0.0186671	1	553	tags=26%, list=11%, signal=30%
TRAVAGLINI_LUNG_PLATELET_MEGAKARYOCYTE_CELL	TRAVAGLINI_LUNG_PLATELET_MEGAKARYOCYTE_CELL	Details ...	155	-0.387341	-1.82456	0	0.018759	1	1167	tags=42%, list=24%, signal=53%
DACOSTA_UV_RESPONSE_VIA_ERCC3_XPCS_DN	DACOSTA_UV_RESPONSE_VIA_ERCC3_XPCS_DN	Details ...	22	-0.578994	-1.82448	0	0.0187454	1	794	tags=45%, list=16%, signal=54%
GOBP_POSITIVE_REGULATION_OF_PATTERN_RECOGNITION_RECEPTOR_SIGNALING_PATHWAY	GOBP_POSITIVE_REGULATION_OF_PATTERN_RECOGNITION_RECEPTOR_SIGNALING_PATHWAY	Details ...	16	-0.603622	-1.82437	0	0.0187669	1	650	tags=50%, list=13%, signal=57%
KEGG_HYPERTROPHIC_CARDIOMYOPATHY_HCM	KEGG_HYPERTROPHIC_CARDIOMYOPATHY_HCM	Details ...	22	-0.584987	-1.8242	0	0.0187884	1	1139	tags=68%, list=23%, signal=89%
HP_LIPOATROPHY	HP_LIPOATROPHY	Details ...	21	-0.584607	-1.82373	0	0.0188534	1	906	tags=62%, list=19%, signal=76%
GOBP_CYTOKINE_PRODUCTION	GOBP_CYTOKINE_PRODUCTION	Details ...	203	-0.36391	-1.82373	0	0.0188398	1	803	tags=32%, list=16%, signal=36%
ZWANG_CLASS_3_TRANSIENTLY_INDUCED_BY_EGF	ZWANG_CLASS_3_TRANSIENTLY_INDUCED_BY_EGF	Details ...	80	-0.431271	-1.82359	0	0.0188349	1	876	tags=43%, list=18%, signal=51%
GSE21927_SPLEEN_VS_C26GM_TUMOR_MONOCYTE_BALBC_UP	GSE21927_SPLEEN_VS_C26GM_TUMOR_MONOCYTE_BALBC_UP	Details ...	40	-0.472362	-1.82328	0	0.0188998	1	438	tags=28%, list=9%, signal=30%
AKT_UP.V1_DN	AKT_UP.V1_DN	Details ...	53	-0.437437	-1.82308	0	0.0189297	1	877	tags=42%, list=18%, signal=50%
DURANTE_ADULT_OLFACTORY_NEUROEPITHELIUM_CD8_T_CELLS	DURANTE_ADULT_OLFACTORY_NEUROEPITHELIUM_CD8_T_CELLS	Details ...	16	-0.61804	-1.8229	0	0.0189771	1	581	tags=50%, list=12%, signal=57%
GSE22140_GERMFREE_VS_SPF_MOUSE_CD4_TCELL_UP	GSE22140_GERMFREE_VS_SPF_MOUSE_CD4_TCELL_UP	Details ...	62	-0.42113	-1.8228	0	0.0189634	1	1292	tags=52%, list=26%, signal=69%
GOBP_EXTRACELLULAR_MATRIX_DISASSEMBLY	GOBP_EXTRACELLULAR_MATRIX_DISASSEMBLY	Details ...	20	-0.551145	-1.82274	0	0.0189759	1	1136	tags=60%, list=23%, signal=78%
GOBP_REGULATION_OF_EXTRINSIC_APOPTOTIC_SIGNALING_PATHWAY_VIA_DEATH_DOMAIN_RECEPTORS	GOBP_REGULATION_OF_EXTRINSIC_APOPTOTIC_SIGNALING_PATHWAY_VIA_DEATH_DOMAIN_RECEPTORS	Details ...	17	-0.538705	-1.82241	0	0.0190492	1	902	tags=53%, list=18%, signal=65%
HP_ABNORMALITY_OF_THE_ABDOMINAL_WALL	HP_ABNORMALITY_OF_THE_ABDOMINAL_WALL	Details ...	125	-0.372819	-1.82128	0	0.0192393	1	659	tags=26%, list=13%, signal=30%
ICHIBA_GRAFT_VERSUS_HOST_DISEASE_35D_UP	ICHIBA_GRAFT_VERSUS_HOST_DISEASE_35D_UP	Details ...	37	-0.486501	-1.82113	0	0.0192341	1	1423	tags=68%, list=29%, signal=95%
GSE6269_FLU_VS_STAPH_AUREUS_INF_PBMC_DN	GSE6269_FLU_VS_STAPH_AUREUS_INF_PBMC_DN	Details ...	55	-0.451802	-1.82102	0	0.0192151	1	1025	tags=53%, list=21%, signal=66%
HP_MULTIFACTORIAL_INHERITANCE	HP_MULTIFACTORIAL_INHERITANCE	Details ...	21	-0.557805	-1.82095	0	0.0192186	1	1050	tags=67%, list=21%, signal=85%
GSE7548_NAIVE_VS_DAY7_PCC_IMMUNIZATION_CD4_TCELL_DN	GSE7548_NAIVE_VS_DAY7_PCC_IMMUNIZATION_CD4_TCELL_DN	Details ...	67	-0.447889	-1.8208	0	0.0192048	1	1629	tags=63%, list=33%, signal=93%
GSE14415_INDUCED_TREG_VS_TCONV_DN	GSE14415_INDUCED_TREG_VS_TCONV_DN	Details ...	49	-0.444037	-1.82074	0	0.019191	1	1005	tags=51%, list=21%, signal=64%
GSE21360_NAIVE_VS_SECONDARY_MEMORY_CD8_TCELL_UP	GSE21360_NAIVE_VS_SECONDARY_MEMORY_CD8_TCELL_UP	Details ...	69	-0.441346	-1.82044	0	0.0192204	1	1406	tags=62%, list=29%, signal=86%
WP_ASSOCIATION_BETWEEN_PHYSICOCHEMICAL_FEATURES_AND_TOXICITY_ASSOCIATED_PATHWAYS	WP_ASSOCIATION_BETWEEN_PHYSICOCHEMICAL_FEATURES_AND_TOXICITY_ASSOCIATED_PATHWAYS	Details ...	20	-0.53552	-1.82014	0	0.0192499	1	742	tags=45%, list=15%, signal=53%
RICKMAN_TUMOR_DIFFERENTIATED_WELL_VS_MODERATELY_DN	RICKMAN_TUMOR_DIFFERENTIATED_WELL_VS_MODERATELY_DN	Details ...	23	-0.533068	-1.81929	0	0.0193829	1	1563	tags=74%, list=32%, signal=108%
HOSHIDA_LIVER_CANCER_SURVIVAL_UP	HOSHIDA_LIVER_CANCER_SURVIVAL_UP	Details ...	20	-0.561571	-1.81923	0	0.0194123	1	450	tags=40%, list=9%, signal=44%
LEE_EARLY_T_LYMPHOCYTE_DN	LEE_EARLY_T_LYMPHOCYTE_DN	Details ...	21	-0.557713	-1.81891	0	0.01945	1	830	tags=57%, list=17%, signal=69%
GSE26030_UNSTIM_VS_RESTIM_TH1_DAY5_POST_POLARIZATION_DN	GSE26030_UNSTIM_VS_RESTIM_TH1_DAY5_POST_POLARIZATION_DN	Details ...	54	-0.456562	-1.81833	0	0.0195397	1	1099	tags=48%, list=22%, signal=61%
GOBP_POSITIVE_REGULATION_OF_IMMUNE_SYSTEM_PROCESS	GOBP_POSITIVE_REGULATION_OF_IMMUNE_SYSTEM_PROCESS	Details ...	217	-0.361167	-1.8175	0	0.0196407	1	652	tags=24%, list=13%, signal=27%
GSE40274_CTRL_VS_FOXP3_TRANSDUCED_ACTIVATED_CD4_TCELL_DN	GSE40274_CTRL_VS_FOXP3_TRANSDUCED_ACTIVATED_CD4_TCELL_DN	Details ...	51	-0.450465	-1.81742	0	0.0196267	1	1319	tags=61%, list=27%, signal=82%
HP_THIN_SKIN	HP_THIN_SKIN	Details ...	25	-0.58259	-1.81722	0	0.0196418	1	847	tags=48%, list=17%, signal=58%
DESCARTES_FETAL_PANCREAS_MESOTHELIAL_CELLS	DESCARTES_FETAL_PANCREAS_MESOTHELIAL_CELLS	Details ...	15	-0.611924	-1.81716	0	0.0196278	1	211	tags=40%, list=4%, signal=42%
YAGI_AML_FAB_MARKERS	YAGI_AML_FAB_MARKERS	Details ...	60	-0.432026	-1.81692	0	0.0196481	1	1029	tags=45%, list=21%, signal=56%
GSE41176_WT_VS_TAK1_KO_ANTI_IGM_STIM_BCELL_24H_UP	GSE41176_WT_VS_TAK1_KO_ANTI_IGM_STIM_BCELL_24H_UP	Details ...	75	-0.417192	-1.81679	0	0.0196459	1	1572	tags=59%, list=32%, signal=85%
GSE33424_CD161_INT_VS_NEG_CD8_TCELL_UP	GSE33424_CD161_INT_VS_NEG_CD8_TCELL_UP	Details ...	68	-0.429421	-1.81676	0	0.019632	1	1358	tags=53%, list=28%, signal=72%
GOBP_POSITIVE_REGULATION_OF_RESPONSE_TO_WOUNDING	GOBP_POSITIVE_REGULATION_OF_RESPONSE_TO_WOUNDING	Details ...	24	-0.518518	-1.81573	0	0.0197922	1	1233	tags=67%, list=25%, signal=89%
GSE17721_CTRL_VS_LPS_1H_BMDC_DN	GSE17721_CTRL_VS_LPS_1H_BMDC_DN	Details ...	51	-0.450718	-1.81538	0	0.0198806	1	920	tags=39%, list=19%, signal=48%
GSE34156_TLR1_TLR2_LIGAND_VS_NOD2_AND_TLR1_TLR2_LIGAND_6H_TREATED_MONOCYTE_UP	GSE34156_TLR1_TLR2_LIGAND_VS_NOD2_AND_TLR1_TLR2_LIGAND_6H_TREATED_MONOCYTE_UP	Details ...	45	-0.446554	-1.81531	0	0.0198921	1	1044	tags=40%, list=21%, signal=50%
GOBP_REGULATION_OF_PHOSPHORUS_METABOLIC_PROCESS	GOBP_REGULATION_OF_PHOSPHORUS_METABOLIC_PROCESS	Details ...	395	-0.336397	-1.81517	0	0.0198865	1	1034	tags=33%, list=21%, signal=38%
GSE22886_NAIVE_BCELL_VS_NEUTROPHIL_DN	GSE22886_NAIVE_BCELL_VS_NEUTROPHIL_DN	Details ...	60	-0.424859	-1.81501	0	0.0199239	1	1136	tags=47%, list=23%, signal=60%
QUEREC_PBMC_YF_17D_VACCINE_AGE_18_45YO_7DY_UP	QUEREC_PBMC_YF_17D_VACCINE_AGE_18_45YO_7DY_UP	Details ...	21	-0.578947	-1.81489	0	0.0199353	1	1082	tags=62%, list=22%, signal=79%
GOBP_RESPONSE_TO_TUMOR_NECROSIS_FACTOR	GOBP_RESPONSE_TO_TUMOR_NECROSIS_FACTOR	Details ...	84	-0.417009	-1.81478	0	0.0199639	1	959	tags=35%, list=20%, signal=42%
MODULE_85	MODULE_85	Details ...	15	-0.614293	-1.81459	0	0.0199527	1	787	tags=60%, list=16%, signal=71%
BILD_SRC_ONCOGENIC_SIGNATURE	BILD_SRC_ONCOGENIC_SIGNATURE	Details ...	17	-0.581103	-1.81426	0	0.0200065	1	539	tags=41%, list=11%, signal=46%
GOBP_REGULATION_OF_ACTIN_FILAMENT_ORGANIZATION	GOBP_REGULATION_OF_ACTIN_FILAMENT_ORGANIZATION	Details ...	86	-0.413905	-1.81421	0	0.0200094	1	1211	tags=50%, list=25%, signal=65%
GOBP_EXTRINSIC_APOPTOTIC_SIGNALING_PATHWAY_VIA_DEATH_DOMAIN_RECEPTORS	GOBP_EXTRINSIC_APOPTOTIC_SIGNALING_PATHWAY_VIA_DEATH_DOMAIN_RECEPTORS	Details ...	23	-0.539979	-1.81358	0	0.0201426	1	1454	tags=70%, list=30%, signal=99%
GOMF_MODIFIED_AMINO_ACID_BINDING	GOMF_MODIFIED_AMINO_ACID_BINDING	Details ...	28	-0.52551	-1.8135	0	0.0201285	1	306	tags=29%, list=6%, signal=30%
GOBP_POSITIVE_REGULATION_OF_PROTEIN_KINASE_B_SIGNALING	GOBP_POSITIVE_REGULATION_OF_PROTEIN_KINASE_B_SIGNALING	Details ...	35	-0.492516	-1.81346	0	0.0201483	1	1233	tags=57%, list=25%, signal=76%
GSE28408_LY6G_POS_VS_NEG_DC_UP	GSE28408_LY6G_POS_VS_NEG_DC_UP	Details ...	53	-0.450509	-1.81301	0	0.0202358	1	1560	tags=62%, list=32%, signal=90%
GOCC_SUPRAMOLECULAR_POLYMER	GOCC_SUPRAMOLECULAR_POLYMER	Details ...	228	-0.362371	-1.81266	0	0.0202554	1	1231	tags=43%, list=25%, signal=55%
GSE21546_ELK1_KO_VS_SAP1A_KO_AND_ELK1_KO_DP_THYMOCYTES_UP	GSE21546_ELK1_KO_VS_SAP1A_KO_AND_ELK1_KO_DP_THYMOCYTES_UP	Details ...	55	-0.45374	-1.81225	0	0.0203001	1	1545	tags=69%, list=32%, signal=100%
GSE21360_TERTIARY_VS_QUATERNARY_MEMORY_CD8_TCELL_DN	GSE21360_TERTIARY_VS_QUATERNARY_MEMORY_CD8_TCELL_DN	Details ...	58	-0.417737	-1.81168	0	0.0203706	1	1470	tags=64%, list=30%, signal=90%
GSE29618_MONOCYTE_VS_MDC_UP	GSE29618_MONOCYTE_VS_MDC_UP	Details ...	53	-0.427736	-1.8116	0	0.0203818	1	1482	tags=66%, list=30%, signal=94%
DESCARTES_MAIN_FETAL_TROPHOBLAST_GIANT_CELLS	DESCARTES_MAIN_FETAL_TROPHOBLAST_GIANT_CELLS	Details ...	33	-0.487915	-1.81154	0	0.0203675	1	947	tags=52%, list=19%, signal=63%
ZHONG_RESPONSE_TO_AZACITIDINE_AND_TSA_UP	ZHONG_RESPONSE_TO_AZACITIDINE_AND_TSA_UP	Details ...	51	-0.451799	-1.81105	0	0.0204377	1	1099	tags=51%, list=22%, signal=65%
GSE11864_CSF1_IFNG_VS_CSF1_IFNG_PAM3CYS_IN_MAC_DN	GSE11864_CSF1_IFNG_VS_CSF1_IFNG_PAM3CYS_IN_MAC_DN	Details ...	41	-0.46998	-1.81099	0	0.0204402	1	1292	tags=51%, list=26%, signal=69%
MODULE_289	MODULE_289	Details ...	16	-0.607963	-1.81011	0	0.0206364	1	235	tags=44%, list=5%, signal=46%
DAZARD_RESPONSE_TO_UV_NHEK_UP	DAZARD_RESPONSE_TO_UV_NHEK_UP	Details ...	56	-0.425811	-1.81006	0	0.0206221	1	619	tags=30%, list=13%, signal=34%
MODULE_322	MODULE_322	Details ...	16	-0.567173	-1.80854	0	0.0209767	1	1225	tags=63%, list=25%, signal=83%
GOBP_MYELOID_CELL_DIFFERENTIATION	GOBP_MYELOID_CELL_DIFFERENTIATION	Details ...	101	-0.415919	-1.80815	0	0.0210876	1	1233	tags=47%, list=25%, signal=61%
HP_ABNORMALITY_OF_BLOOD_AND_BLOOD_FORMING_TISSUES	HP_ABNORMALITY_OF_BLOOD_AND_BLOOD_FORMING_TISSUES	Details ...	318	-0.342127	-1.80803	0	0.0211401	1	1479	tags=44%, list=30%, signal=59%
HP_LIMITATION_OF_JOINT_MOBILITY	HP_LIMITATION_OF_JOINT_MOBILITY	Details ...	94	-0.394869	-1.80747	0	0.0212259	1	841	tags=35%, list=17%, signal=42%
EPPERT_HSC_R	EPPERT_HSC_R	Details ...	34	-0.496927	-1.80747	0	0.0212111	1	726	tags=47%, list=15%, signal=55%
GSE27786_CD8_TCELL_VS_ERYTHROBLAST_DN	GSE27786_CD8_TCELL_VS_ERYTHROBLAST_DN	Details ...	39	-0.45783	-1.80742	0	0.0211964	1	515	tags=28%, list=11%, signal=31%
BACH1_01	BACH1_01	Details ...	90	-0.394109	-1.80682	0	0.0213495	1	945	tags=41%, list=19%, signal=50%
BURTON_ADIPOGENESIS_7	BURTON_ADIPOGENESIS_7	Details ...	28	-0.524249	-1.80676	0	0.0213599	1	1196	tags=68%, list=24%, signal=89%
GOBP_NEGATIVE_REGULATION_OF_HORMONE_SECRETION	GOBP_NEGATIVE_REGULATION_OF_HORMONE_SECRETION	Details ...	18	-0.594161	-1.80671	0	0.0213535	1	693	tags=50%, list=14%, signal=58%
MIR4326	MIR4326	Details ...	18	-0.597813	-1.80665	0	0.0213387	1	510	tags=33%, list=10%, signal=37%
GOBP_POSITIVE_REGULATION_OF_SECRETION	GOBP_POSITIVE_REGULATION_OF_SECRETION	Details ...	61	-0.425268	-1.80634	0	0.0214074	1	792	tags=31%, list=16%, signal=37%
GSE27670_CTRL_VS_LMP1_TRANSDUCED_GC_BCELL_DN	GSE27670_CTRL_VS_LMP1_TRANSDUCED_GC_BCELL_DN	Details ...	51	-0.456782	-1.80573	0	0.0215514	1	1145	tags=47%, list=23%, signal=61%
COREBINDINGFACTOR_Q6	COREBINDINGFACTOR_Q6	Details ...	70	-0.395306	-1.80563	0	0.0215698	1	974	tags=39%, list=20%, signal=47%
ZHONG_SECRETOME_OF_LUNG_CANCER_AND_MACROPHAGE	ZHONG_SECRETOME_OF_LUNG_CANCER_AND_MACROPHAGE	Details ...	28	-0.501405	-1.80454	0	0.0217479	1	890	tags=39%, list=18%, signal=48%
GOBP_LOCOMOTION	GOBP_LOCOMOTION	Details ...	463	-0.325663	-1.80441	0	0.0217495	1	1027	tags=37%, list=21%, signal=43%
RUTELLA_RESPONSE_TO_CSF2RB_AND_IL4_DN	RUTELLA_RESPONSE_TO_CSF2RB_AND_IL4_DN	Details ...	100	-0.408413	-1.8044	0	0.0217428	1	1130	tags=45%, list=23%, signal=57%
GOBP_MUSCLE_ORGAN_DEVELOPMENT	GOBP_MUSCLE_ORGAN_DEVELOPMENT	Details ...	76	-0.404173	-1.80431	0	0.0217446	1	1156	tags=51%, list=24%, signal=66%
HP_LIMB_JOINT_CONTRACTURE	HP_LIMB_JOINT_CONTRACTURE	Details ...	94	-0.404256	-1.80379	0	0.0218458	1	925	tags=35%, list=19%, signal=42%
GSE32986_CURDLAN_HIGHDOSE_VS_GMCSF_AND_CURDLAN_HIGHDOSE_STIM_DC_DN	GSE32986_CURDLAN_HIGHDOSE_VS_GMCSF_AND_CURDLAN_HIGHDOSE_STIM_DC_DN	Details ...	56	-0.441254	-1.80354	0	0.0218806	1	1292	tags=59%, list=26%, signal=79%
BROWNE_HCMV_INFECTION_8HR_DN	BROWNE_HCMV_INFECTION_8HR_DN	Details ...	18	-0.612351	-1.80346	0	0.0218821	1	683	tags=56%, list=14%, signal=64%
AMIT_EGF_RESPONSE_480_MCF10A	AMIT_EGF_RESPONSE_480_MCF10A	Details ...	16	-0.581729	-1.80344	0	0.0218754	1	741	tags=44%, list=15%, signal=51%
CHIARADONNA_NEOPLASTIC_TRANSFORMATION_KRAS_CDC25_DN	CHIARADONNA_NEOPLASTIC_TRANSFORMATION_KRAS_CDC25_DN	Details ...	17	-0.617516	-1.80308	0	0.0219517	1	1074	tags=76%, list=22%, signal=98%
GSE29618_BCELL_VS_MONOCYTE_DAY7_FLU_VACCINE_DN	GSE29618_BCELL_VS_MONOCYTE_DAY7_FLU_VACCINE_DN	Details ...	63	-0.415405	-1.8029	0	0.021945	1	1471	tags=60%, list=30%, signal=85%
MARKEY_RB1_ACUTE_LOF_DN	MARKEY_RB1_ACUTE_LOF_DN	Details ...	69	-0.433079	-1.80183	0	0.0221458	1	785	tags=41%, list=16%, signal=48%
GOBP_REGULATION_OF_EXTRINSIC_APOPTOTIC_SIGNALING_PATHWAY	GOBP_REGULATION_OF_EXTRINSIC_APOPTOTIC_SIGNALING_PATHWAY	Details ...	49	-0.443167	-1.80149	0	0.0221965	1	801	tags=37%, list=16%, signal=43%
GOBP_TAXIS	GOBP_TAXIS	Details ...	153	-0.360043	-1.80148	0	0.0221813	1	813	tags=35%, list=17%, signal=41%
GOBP_REGULATION_OF_RAS_PROTEIN_SIGNAL_TRANSDUCTION	GOBP_REGULATION_OF_RAS_PROTEIN_SIGNAL_TRANSDUCTION	Details ...	60	-0.446415	-1.80127	0	0.0222486	1	1159	tags=47%, list=24%, signal=60%
GOBP_POSITIVE_REGULATION_OF_HEMOPOIESIS	GOBP_POSITIVE_REGULATION_OF_HEMOPOIESIS	Details ...	41	-0.472596	-1.8011	0	0.0222911	1	756	tags=39%, list=15%, signal=46%
GSE22611_UNSTIM_VS_6H_MDP_STIM_MUTANT_NOD2_TRANSDUCED_HEK293T_CELL_UP	GSE22611_UNSTIM_VS_6H_MDP_STIM_MUTANT_NOD2_TRANSDUCED_HEK293T_CELL_UP	Details ...	54	-0.451941	-1.8011	0	0.0222759	1	1187	tags=54%, list=24%, signal=70%
MODULE_241	MODULE_241	Details ...	24	-0.534441	-1.80109	0	0.0222607	1	1067	tags=58%, list=22%, signal=74%
DOUGLAS_BMI1_TARGETS_DN	DOUGLAS_BMI1_TARGETS_DN	Details ...	109	-0.386598	-1.80061	0	0.0223685	1	1315	tags=46%, list=27%, signal=61%
GSE40274_SATB1_VS_FOXP3_AND_SATB1_TRANSDUCED_ACTIVATED_CD4_TCELL_DN	GSE40274_SATB1_VS_FOXP3_AND_SATB1_TRANSDUCED_ACTIVATED_CD4_TCELL_DN	Details ...	36	-0.482049	-1.80011	0	0.0224272	1	1183	tags=53%, list=24%, signal=69%
GSE36527_CD69_NEG_VS_POS_TREG_CD62L_LOS_KLRG1_NEG_UP	GSE36527_CD69_NEG_VS_POS_TREG_CD62L_LOS_KLRG1_NEG_UP	Details ...	69	-0.404838	-1.80001	0	0.022412	1	1640	tags=62%, list=34%, signal=92%
REACTOME_COLLAGEN_CHAIN_TRIMERIZATION	REACTOME_COLLAGEN_CHAIN_TRIMERIZATION	Details ...	19	-0.590561	-1.79971	0	0.0224784	1	374	tags=53%, list=8%, signal=57%
DESCARTES_FETAL_CEREBRUM_MICROGLIA	DESCARTES_FETAL_CEREBRUM_MICROGLIA	Details ...	78	-0.412672	-1.79955	0	0.0224876	1	534	tags=31%, list=11%, signal=34%
GOBP_REGULATION_OF_PROTEIN_LOCALIZATION_TO_CELL_PERIPHERY	GOBP_REGULATION_OF_PROTEIN_LOCALIZATION_TO_CELL_PERIPHERY	Details ...	44	-0.471055	-1.7992	0	0.0225391	1	1219	tags=50%, list=25%, signal=66%
JINESH_BLEBBISHIELD_TRANSFORMED_STEM_CELL_SPHERES_UP	JINESH_BLEBBISHIELD_TRANSFORMED_STEM_CELL_SPHERES_UP	Details ...	62	-0.458846	-1.79866	0	0.0227119	1	925	tags=40%, list=19%, signal=49%
HP_INGUINAL_HERNIA	HP_INGUINAL_HERNIA	Details ...	71	-0.42702	-1.79857	0	0.0227129	1	651	tags=28%, list=13%, signal=32%
GSE32164_RESTING_DIFFERENTIATED_VS_CMYC_INHIBITED_MACROPHAGE_DN	GSE32164_RESTING_DIFFERENTIATED_VS_CMYC_INHIBITED_MACROPHAGE_DN	Details ...	62	-0.428634	-1.79767	0	0.0228787	1	1338	tags=52%, list=27%, signal=70%
GOCC_ACTIN_FILAMENT_BUNDLE	GOCC_ACTIN_FILAMENT_BUNDLE	Details ...	29	-0.514134	-1.7976	0	0.0228714	1	1199	tags=62%, list=25%, signal=82%
NAKAYAMA_SOFT_TISSUE_TUMORS_PCA2_UP	NAKAYAMA_SOFT_TISSUE_TUMORS_PCA2_UP	Details ...	35	-0.481873	-1.79706	0	0.0230027	1	434	tags=26%, list=9%, signal=28%
FAN_EMBRYONIC_CTX_BRAIN_EFFECTOR_T_CELL	FAN_EMBRYONIC_CTX_BRAIN_EFFECTOR_T_CELL	Details ...	29	-0.513753	-1.79705	0	0.0229952	1	1319	tags=66%, list=27%, signal=89%
GSE40274_FOXP3_VS_FOXP3_AND_LEF1_TRANSDUCED_ACTIVATED_CD4_TCELL_UP	GSE40274_FOXP3_VS_FOXP3_AND_LEF1_TRANSDUCED_ACTIVATED_CD4_TCELL_UP	Details ...	58	-0.430793	-1.79644	0	0.0230775	1	884	tags=41%, list=18%, signal=50%
GSE17721_CTRL_VS_GARDIQUIMOD_12H_BMDC_DN	GSE17721_CTRL_VS_GARDIQUIMOD_12H_BMDC_DN	Details ...	65	-0.425654	-1.79611	0	0.0231109	1	1019	tags=42%, list=21%, signal=52%
GSE8384_CTRL_VS_B_ABORTUS_4H_MAC_CELL_LINE_DN	GSE8384_CTRL_VS_B_ABORTUS_4H_MAC_CELL_LINE_DN	Details ...	67	-0.399821	-1.79608	0	0.0230953	1	1212	tags=42%, list=25%, signal=55%
GSE21380_NON_TFH_VS_TFH_CD4_TCELL_DN	GSE21380_NON_TFH_VS_TFH_CD4_TCELL_DN	Details ...	60	-0.442951	-1.79559	0	0.0231447	1	1167	tags=53%, list=24%, signal=69%
HOEBEKE_LYMPHOID_STEM_CELL_DN	HOEBEKE_LYMPHOID_STEM_CELL_DN	Details ...	33	-0.487998	-1.7949	0	0.0232843	1	1081	tags=58%, list=22%, signal=73%
GSE10325_MYELOID_VS_LUPUS_MYELOID_DN	GSE10325_MYELOID_VS_LUPUS_MYELOID_DN	Details ...	64	-0.42694	-1.79485	0	0.0232848	1	1744	tags=66%, list=36%, signal=101%
GSE25123_IL4_VS_IL4_AND_ROSIGLITAZONE_STIM_PPARG_KO_MACROPHAGE_DAY10_DN	GSE25123_IL4_VS_IL4_AND_ROSIGLITAZONE_STIM_PPARG_KO_MACROPHAGE_DAY10_DN	Details ...	56	-0.420539	-1.79448	0	0.0233986	1	1425	tags=66%, list=29%, signal=92%
MODULE_119	MODULE_119	Details ...	39	-0.461887	-1.79423	0	0.0234394	1	1082	tags=51%, list=22%, signal=65%
GOBP_NEGATIVE_REGULATION_OF_SIGNALING	GOBP_NEGATIVE_REGULATION_OF_SIGNALING	Details ...	385	-0.339111	-1.79422	0	0.0234237	1	1025	tags=36%, list=21%, signal=42%
YAO_TEMPORAL_RESPONSE_TO_PROGESTERONE_CLUSTER_6	YAO_TEMPORAL_RESPONSE_TO_PROGESTERONE_CLUSTER_6	Details ...	25	-0.549562	-1.79387	0	0.0234807	1	621	tags=52%, list=13%, signal=59%
RUBENSTEIN_SKELETAL_MUSCLE_SMOOTH_MUSCLE_CELLS	RUBENSTEIN_SKELETAL_MUSCLE_SMOOTH_MUSCLE_CELLS	Details ...	153	-0.375733	-1.79337	0	0.0235378	1	881	tags=31%, list=18%, signal=36%
GOCC_GOLGI_APPARATUS_SUBCOMPARTMENT	GOCC_GOLGI_APPARATUS_SUBCOMPARTMENT	Details ...	246	-0.335752	-1.79316	0	0.0235866	1	1679	tags=54%, list=34%, signal=78%
GSE14769_UNSTIM_VS_60MIN_LPS_BMDM_DN	GSE14769_UNSTIM_VS_60MIN_LPS_BMDM_DN	Details ...	64	-0.407242	-1.79309	0	0.023595	1	1157	tags=53%, list=24%, signal=69%
GSE19888_ADENOSINE_A3R_INH_VS_ACT_WITH_INHIBITOR_PRETREATMENT_IN_MAST_CELL_UP	GSE19888_ADENOSINE_A3R_INH_VS_ACT_WITH_INHIBITOR_PRETREATMENT_IN_MAST_CELL_UP	Details ...	49	-0.442902	-1.79301	0	0.0235954	1	1439	tags=69%, list=29%, signal=97%
GSE24142_DN2_VS_DN3_THYMOCYTE_UP	GSE24142_DN2_VS_DN3_THYMOCYTE_UP	Details ...	69	-0.407301	-1.79269	0	0.0236606	1	1411	tags=59%, list=29%, signal=82%
GOCC_GOLGI_APPARATUS	GOCC_GOLGI_APPARATUS	Details ...	410	-0.322506	-1.79215	0	0.0237335	1	1504	tags=46%, list=31%, signal=61%
RODRIGUES_NTN1_TARGETS_DN	RODRIGUES_NTN1_TARGETS_DN	Details ...	50	-0.444185	-1.79206	0	0.0237817	1	946	tags=44%, list=19%, signal=54%
GOBP_PROGRAMMED_NECROTIC_CELL_DEATH	GOBP_PROGRAMMED_NECROTIC_CELL_DEATH	Details ...	21	-0.553361	-1.79177	0	0.023806	1	784	tags=48%, list=16%, signal=56%
GSE37533_UNTREATED_VS_PIOGLIZATONE_TREATED_CD4_TCELL_PPARG1_AND_FOXP3_TRASDUCED_UP	GSE37533_UNTREATED_VS_PIOGLIZATONE_TREATED_CD4_TCELL_PPARG1_AND_FOXP3_TRASDUCED_UP	Details ...	64	-0.423485	-1.79101	0	0.0239668	1	898	tags=39%, list=18%, signal=47%
ZHU_CMV_ALL_UP	ZHU_CMV_ALL_UP	Details ...	36	-0.477094	-1.79043	0	0.0240949	1	512	tags=31%, list=10%, signal=34%
MIR197_3P	MIR197_3P	Details ...	17	-0.607382	-1.7903	0	0.0241029	1	752	tags=47%, list=15%, signal=55%
GSE41867_NAIVE_VS_DAY6_LCMV_EFFECTOR_CD8_TCELL_UP	GSE41867_NAIVE_VS_DAY6_LCMV_EFFECTOR_CD8_TCELL_UP	Details ...	47	-0.434413	-1.79025	0	0.024087	1	1504	tags=57%, list=31%, signal=82%
GSE9946_MATURE_STIMULATORY_VS_PROSTAGLANDINE2_TREATED_MATURE_DC_UP	GSE9946_MATURE_STIMULATORY_VS_PROSTAGLANDINE2_TREATED_MATURE_DC_UP	Details ...	31	-0.479478	-1.79025	0	0.024071	1	998	tags=35%, list=20%, signal=44%
HP_ABNORMALITY_OF_UPPER_LIMB_JOINT	HP_ABNORMALITY_OF_UPPER_LIMB_JOINT	Details ...	130	-0.362259	-1.7898	0	0.0241667	1	689	tags=27%, list=14%, signal=31%
GSE14769_UNSTIM_VS_80MIN_LPS_BMDM_DN	GSE14769_UNSTIM_VS_80MIN_LPS_BMDM_DN	Details ...	63	-0.444785	-1.78931	0	0.0242943	1	1180	tags=51%, list=24%, signal=66%
HOWARD_NEUTROPHIL_INACT_MONOV_INFLUENZA_A_INDONESIA_05_2005_H5N1_AGE_18_49YO_3DY_UP	HOWARD_NEUTROPHIL_INACT_MONOV_INFLUENZA_A_INDONESIA_05_2005_H5N1_AGE_18_49YO_3DY_UP	Details ...	36	-0.498171	-1.78796	0	0.0247003	1	961	tags=50%, list=20%, signal=62%
GSE35825_UNTREATED_VS_IFNG_STIM_MACROPHAGE_UP	GSE35825_UNTREATED_VS_IFNG_STIM_MACROPHAGE_UP	Details ...	56	-0.45696	-1.78788	0	0.0247078	1	764	tags=38%, list=16%, signal=44%
GSE17721_12H_VS_24H_CPG_BMDC_UP	GSE17721_12H_VS_24H_CPG_BMDC_UP	Details ...	54	-0.435149	-1.78788	0	0.0246915	1	784	tags=30%, list=16%, signal=35%
GOBP_POSITIVE_REGULATION_OF_I_KAPPAB_KINASE_NF_KAPPAB_SIGNALING	GOBP_POSITIVE_REGULATION_OF_I_KAPPAB_KINASE_NF_KAPPAB_SIGNALING	Details ...	61	-0.461759	-1.78762	0	0.0246988	1	1523	tags=70%, list=31%, signal=101%
GSE4590_PRE_BCELL_VS_LARGE_PRE_BCELL_UP	GSE4590_PRE_BCELL_VS_LARGE_PRE_BCELL_UP	Details ...	47	-0.461491	-1.78709	0	0.0248086	1	1122	tags=47%, list=23%, signal=60%
STTTCRNTTT_IRF_Q6	STTTCRNTTT_IRF_Q6	Details ...	56	-0.438924	-1.78702	0	0.0248082	1	764	tags=38%, list=16%, signal=44%
MANNE_COVID19_COMBINED_COHORT_VS_HEALTHY_DONOR_PLATELETS_DN	MANNE_COVID19_COMBINED_COHORT_VS_HEALTHY_DONOR_PLATELETS_DN	Details ...	49	-0.453501	-1.787	0	0.024792	1	648	tags=37%, list=13%, signal=42%
GSE32164_RESTING_DIFFERENTIATED_VS_ALTERNATIVELY_ACT_M2_MACROPHAGE_DN	GSE32164_RESTING_DIFFERENTIATED_VS_ALTERNATIVELY_ACT_M2_MACROPHAGE_DN	Details ...	55	-0.425438	-1.78681	0	0.0248152	1	1265	tags=53%, list=26%, signal=70%
GSE17974_IL4_AND_ANTI_IL12_VS_UNTREATED_1H_ACT_CD4_TCELL_DN	GSE17974_IL4_AND_ANTI_IL12_VS_UNTREATED_1H_ACT_CD4_TCELL_DN	Details ...	45	-0.449699	-1.78654	0	0.0248938	1	747	tags=38%, list=15%, signal=44%
AMIT_EGF_RESPONSE_240_HELA	AMIT_EGF_RESPONSE_240_HELA	Details ...	25	-0.562126	-1.78642	0	0.024917	1	1105	tags=56%, list=23%, signal=72%
GSE45365_CD8A_DC_VS_CD11B_DC_UP	GSE45365_CD8A_DC_VS_CD11B_DC_UP	Details ...	54	-0.417595	-1.78615	0	0.0249478	1	682	tags=26%, list=14%, signal=30%
REACTOME_GPCR_LIGAND_BINDING	REACTOME_GPCR_LIGAND_BINDING	Details ...	54	-0.449064	-1.78534	0	0.0251841	1	549	tags=35%, list=11%, signal=39%
HP_ABNORMAL_EYELASH_MORPHOLOGY	HP_ABNORMAL_EYELASH_MORPHOLOGY	Details ...	56	-0.445337	-1.78526	0	0.0251756	1	415	tags=21%, list=8%, signal=23%
GSE21380_TFH_VS_GERMINAL_CENTER_TFH_CD4_TCELL_UP	GSE21380_TFH_VS_GERMINAL_CENTER_TFH_CD4_TCELL_UP	Details ...	58	-0.419912	-1.78503	0	0.0252459	1	1019	tags=43%, list=21%, signal=54%
GSE14000_UNSTIM_VS_4H_LPS_DC_DN	GSE14000_UNSTIM_VS_4H_LPS_DC_DN	Details ...	60	-0.427365	-1.78488	0	0.025253	1	1268	tags=52%, list=26%, signal=69%
GSE7460_TCONV_VS_TREG_THYMUS_DN	GSE7460_TCONV_VS_TREG_THYMUS_DN	Details ...	60	-0.409089	-1.78453	0	0.0253459	1	873	tags=47%, list=18%, signal=56%
QI_PLASMACYTOMA_UP	QI_PLASMACYTOMA_UP	Details ...	64	-0.448796	-1.78423	0	0.0254236	1	1173	tags=53%, list=24%, signal=69%
REACTOME_FORMATION_OF_THE_CORNIFIED_ENVELOPE	REACTOME_FORMATION_OF_THE_CORNIFIED_ENVELOPE	Details ...	15	-0.637299	-1.78412	0	0.0254386	1	768	tags=53%, list=16%, signal=63%
GSE17721_LPS_VS_CPG_2H_BMDC_UP	GSE17721_LPS_VS_CPG_2H_BMDC_UP	Details ...	62	-0.436448	-1.7841	0	0.0254221	1	1040	tags=45%, list=21%, signal=57%
AMIT_EGF_RESPONSE_120_MCF10A	AMIT_EGF_RESPONSE_120_MCF10A	Details ...	16	-0.572379	-1.78264	0	0.0257955	1	764	tags=44%, list=16%, signal=52%
KAECH_NAIVE_VS_DAY8_EFF_CD8_TCELL_DN	KAECH_NAIVE_VS_DAY8_EFF_CD8_TCELL_DN	Details ...	70	-0.415664	-1.78212	0	0.025896	1	899	tags=39%, list=18%, signal=47%
GSE5589_IL6_KO_VS_IL10_KO_LPS_AND_IL10_STIM_MACROPHAGE_45MIN_UP	GSE5589_IL6_KO_VS_IL10_KO_LPS_AND_IL10_STIM_MACROPHAGE_45MIN_UP	Details ...	54	-0.450369	-1.78143	0	0.0260826	1	915	tags=43%, list=19%, signal=52%
GOCC_PIGMENT_GRANULE	GOCC_PIGMENT_GRANULE	Details ...	33	-0.483971	-1.78116	0	0.026071	1	1376	tags=55%, list=28%, signal=75%
GOBP_POSITIVE_REGULATION_OF_PROTEIN_MODIFICATION_PROCESS	GOBP_POSITIVE_REGULATION_OF_PROTEIN_MODIFICATION_PROCESS	Details ...	253	-0.341914	-1.78103	0	0.0260774	1	1034	tags=33%, list=21%, signal=39%
GOBP_POSITIVE_REGULATION_OF_CELL_SUBSTRATE_ADHESION	GOBP_POSITIVE_REGULATION_OF_CELL_SUBSTRATE_ADHESION	Details ...	40	-0.468362	-1.78101	0	0.0260916	1	1231	tags=58%, list=25%, signal=76%
GTGCAAT_MIR25_MIR32_MIR92_MIR363_MIR367	GTGCAAT_MIR25_MIR32_MIR92_MIR363_MIR367	Details ...	83	-0.388286	-1.78061	0	0.0261605	1	1818	tags=66%, list=37%, signal=104%
GOBP_CELL_CELL_ADHESION	GOBP_CELL_CELL_ADHESION	Details ...	265	-0.338017	-1.78022	0	0.0262202	1	1261	tags=49%, list=26%, signal=62%
HP_ABNORMALITY_OF_DENTAL_STRUCTURE	HP_ABNORMALITY_OF_DENTAL_STRUCTURE	Details ...	79	-0.40233	-1.78021	0	0.0262033	1	1053	tags=33%, list=22%, signal=41%
THAKAR_PBMC_INACTIVATED_INFLUENZA_AGE_21_30YO_NONRESPONDER_7DY_DN	THAKAR_PBMC_INACTIVATED_INFLUENZA_AGE_21_30YO_NONRESPONDER_7DY_DN	Details ...	23	-0.522282	-1.78005	0	0.0262331	1	963	tags=48%, list=20%, signal=59%
HAY_BONE_MARROW_NEUTROPHIL	HAY_BONE_MARROW_NEUTROPHIL	Details ...	130	-0.367709	-1.77969	0	0.0262628	1	925	tags=35%, list=19%, signal=42%
KRAS.300_UP.V1_DN	KRAS.300_UP.V1_DN	Details ...	28	-0.44793	-1.7794	0	0.0263312	1	479	tags=36%, list=10%, signal=39%
GOBP_POSITIVE_REGULATION_OF_CELL_JUNCTION_ASSEMBLY	GOBP_POSITIVE_REGULATION_OF_CELL_JUNCTION_ASSEMBLY	Details ...	40	-0.48166	-1.77928	0	0.0263763	1	892	tags=50%, list=18%, signal=61%
GSE17974_CTRL_VS_ACT_IL4_AND_ANTI_IL12_24H_CD4_TCELL_UP	GSE17974_CTRL_VS_ACT_IL4_AND_ANTI_IL12_24H_CD4_TCELL_UP	Details ...	53	-0.430646	-1.77911	0	0.0264059	1	1116	tags=53%, list=23%, signal=68%
GSE360_DC_VS_MAC_M_TUBERCULOSIS_UP	GSE360_DC_VS_MAC_M_TUBERCULOSIS_UP	Details ...	52	-0.426039	-1.77906	0	0.0264045	1	926	tags=37%, list=19%, signal=45%
GSE34205_HEALTHY_VS_FLU_INF_INFANT_PBMC_DN	GSE34205_HEALTHY_VS_FLU_INF_INFANT_PBMC_DN	Details ...	60	-0.419664	-1.77859	0	0.0265037	1	1107	tags=48%, list=23%, signal=62%
GSE39820_CTRL_VS_IL1B_IL6_IL23A_CD4_TCELL_DN	GSE39820_CTRL_VS_IL1B_IL6_IL23A_CD4_TCELL_DN	Details ...	64	-0.42608	-1.7784	0	0.0265642	1	926	tags=42%, list=19%, signal=51%
GOBP_EXTRACELLULAR_MATRIX_ASSEMBLY	GOBP_EXTRACELLULAR_MATRIX_ASSEMBLY	Details ...	21	-0.567193	-1.778	0	0.0266168	1	375	tags=43%, list=8%, signal=46%
GOMF_ACTIN_BINDING	GOMF_ACTIN_BINDING	Details ...	134	-0.357169	-1.77735	0	0.0267234	1	1231	tags=51%, list=25%, signal=67%
GOBP_INTRINSIC_APOPTOTIC_SIGNALING_PATHWAY	GOBP_INTRINSIC_APOPTOTIC_SIGNALING_PATHWAY	Details ...	83	-0.400296	-1.77734	0	0.0267063	1	1123	tags=39%, list=23%, signal=49%
GSE11057_NAIVE_VS_MEMORY_CD4_TCELL_DN	GSE11057_NAIVE_VS_MEMORY_CD4_TCELL_DN	Details ...	77	-0.417067	-1.77646	0	0.026913	1	1480	tags=64%, list=30%, signal=90%
GSE34156_TLR1_TLR2_LIGAND_VS_NOD2_AND_TLR1_TLR2_LIGAND_24H_TREATED_MONOCYTE_UP	GSE34156_TLR1_TLR2_LIGAND_VS_NOD2_AND_TLR1_TLR2_LIGAND_24H_TREATED_MONOCYTE_UP	Details ...	61	-0.396998	-1.77645	0	0.0269036	1	1410	tags=57%, list=29%, signal=80%
GSE17721_CTRL_VS_POLYIC_4H_BMDC_DN	GSE17721_CTRL_VS_POLYIC_4H_BMDC_DN	Details ...	61	-0.432708	-1.77643	0	0.0268942	1	883	tags=43%, list=18%, signal=51%
GOBP_MYOFIBRIL_ASSEMBLY	GOBP_MYOFIBRIL_ASSEMBLY	Details ...	22	-0.516229	-1.77642	0	0.0268924	1	914	tags=55%, list=19%, signal=67%
GOBP_CELL_ACTIVATION	GOBP_CELL_ACTIVATION	Details ...	356	-0.338048	-1.77616	0	0.0269752	1	1178	tags=36%, list=24%, signal=44%
GOCC_AZUROPHIL_GRANULE_LUMEN	GOCC_AZUROPHIL_GRANULE_LUMEN	Details ...	22	-0.523757	-1.77591	0	0.0269946	1	1402	tags=59%, list=29%, signal=83%
GSE14415_NATURAL_TREG_VS_TCONV_UP	GSE14415_NATURAL_TREG_VS_TCONV_UP	Details ...	48	-0.420917	-1.77563	0	0.0270544	1	1387	tags=56%, list=28%, signal=78%
GSE5463_CTRL_VS_DEXAMETHASONE_TREATED_THYMOCYTE_DN	GSE5463_CTRL_VS_DEXAMETHASONE_TREATED_THYMOCYTE_DN	Details ...	53	-0.45091	-1.77549	0	0.0270524	1	441	tags=23%, list=9%, signal=25%
GSE17721_LPS_VS_CPG_16H_BMDC_UP	GSE17721_LPS_VS_CPG_16H_BMDC_UP	Details ...	44	-0.419475	-1.77507	0	0.0271044	1	534	tags=25%, list=11%, signal=28%
GSE26030_TH1_VS_TH17_DAY15_POST_POLARIZATION_DN	GSE26030_TH1_VS_TH17_DAY15_POST_POLARIZATION_DN	Details ...	59	-0.459979	-1.77501	0	0.0271024	1	1063	tags=46%, list=22%, signal=58%
GOBP_POSITIVE_REGULATION_OF_INFLAMMATORY_RESPONSE	GOBP_POSITIVE_REGULATION_OF_INFLAMMATORY_RESPONSE	Details ...	48	-0.44376	-1.77463	0	0.0271696	1	417	tags=27%, list=9%, signal=29%
GSE17721_PAM3CSK4_VS_GADIQUIMOD_12H_BMDC_DN	GSE17721_PAM3CSK4_VS_GADIQUIMOD_12H_BMDC_DN	Details ...	74	-0.416559	-1.77443	0	0.027181	1	991	tags=38%, list=20%, signal=47%
GOBP_TRANSMEMBRANE_RECEPTOR_PROTEIN_TYROSINE_KINASE_SIGNALING_PATHWAY	GOBP_TRANSMEMBRANE_RECEPTOR_PROTEIN_TYROSINE_KINASE_SIGNALING_PATHWAY	Details ...	187	-0.357891	-1.77442	0	0.0271715	1	1138	tags=41%, list=23%, signal=51%
CSR_LATE_UP.V1_UP	CSR_LATE_UP.V1_UP	Details ...	64	-0.422626	-1.77423	0	0.0272076	1	308	tags=16%, list=6%, signal=16%
GAUSSMANN_MLL_AF4_FUSION_TARGETS_E_UP	GAUSSMANN_MLL_AF4_FUSION_TARGETS_E_UP	Details ...	29	-0.518683	-1.77339	0	0.0273735	1	936	tags=55%, list=19%, signal=68%
GSE37301_MULTIPOTENT_PROGENITOR_VS_GRAN_MONO_PROGENITOR_DN	GSE37301_MULTIPOTENT_PROGENITOR_VS_GRAN_MONO_PROGENITOR_DN	Details ...	62	-0.437289	-1.7728	0	0.0275852	1	1357	tags=55%, list=28%, signal=75%
GSE13485_DAY1_VS_DAY3_YF17D_VACCINE_PBMC_DN	GSE13485_DAY1_VS_DAY3_YF17D_VACCINE_PBMC_DN	Details ...	53	-0.410467	-1.77268	0	0.0275677	1	1479	tags=53%, list=30%, signal=75%
GOBP_APOPTOTIC_SIGNALING_PATHWAY	GOBP_APOPTOTIC_SIGNALING_PATHWAY	Details ...	164	-0.374774	-1.77247	0	0.0276037	1	1099	tags=37%, list=22%, signal=46%
HP_CORONARY_ARTERY_ATHEROSCLEROSIS	HP_CORONARY_ARTERY_ATHEROSCLEROSIS	Details ...	15	-0.601411	-1.77227	0	0.0276321	1	959	tags=60%, list=20%, signal=74%
GOBP_POSITIVE_REGULATION_OF_BLOOD_VESSEL_ENDOTHELIAL_CELL_MIGRATION	GOBP_POSITIVE_REGULATION_OF_BLOOD_VESSEL_ENDOTHELIAL_CELL_MIGRATION	Details ...	19	-0.588569	-1.7722	0	0.0276679	1	1673	tags=84%, list=34%, signal=128%
GOBP_STRIATED_MUSCLE_CELL_DEVELOPMENT	GOBP_STRIATED_MUSCLE_CELL_DEVELOPMENT	Details ...	33	-0.517864	-1.77191	0	0.0277115	1	914	tags=48%, list=19%, signal=59%
HP_TALIPES_EQUINOVARUS	HP_TALIPES_EQUINOVARUS	Details ...	81	-0.406592	-1.77164	0	0.027753	1	689	tags=28%, list=14%, signal=33%
FAN_OVARY_CL4_T_LYMPHOCYTE_NK_CELL_1	FAN_OVARY_CL4_T_LYMPHOCYTE_NK_CELL_1	Details ...	70	-0.418953	-1.77078	0	0.0279834	1	1768	tags=66%, list=36%, signal=102%
GSE22886_DAY1_VS_DAY7_MONOCYTE_IN_CULTURE_UP	GSE22886_DAY1_VS_DAY7_MONOCYTE_IN_CULTURE_UP	Details ...	58	-0.453565	-1.7705	0	0.0280875	1	1082	tags=47%, list=22%, signal=59%
MODULE_436	MODULE_436	Details ...	27	-0.497749	-1.77036	0	0.028085	1	1041	tags=63%, list=21%, signal=80%
KEGG_DILATED_CARDIOMYOPATHY	KEGG_DILATED_CARDIOMYOPATHY	Details ...	23	-0.540555	-1.77012	0	0.0281355	1	1139	tags=61%, list=23%, signal=79%
GOBP_NEGATIVE_REGULATION_OF_MYELOID_CELL_DIFFERENTIATION	GOBP_NEGATIVE_REGULATION_OF_MYELOID_CELL_DIFFERENTIATION	Details ...	25	-0.498512	-1.76982	0	0.0282087	1	544	tags=24%, list=11%, signal=27%
HP_ABNORMAL_NEPHRON_MORPHOLOGY	HP_ABNORMAL_NEPHRON_MORPHOLOGY	Details ...	43	-0.436188	-1.7696	0	0.0282288	1	925	tags=40%, list=19%, signal=48%
MORF_CASP10	MORF_CASP10	Details ...	19	-0.566259	-1.76911	0	0.028317	1	662	tags=42%, list=14%, signal=49%
GSE15735_CTRL_VS_HDAC_INHIBITOR_TREATED_CD4_TCELL_2H_UP	GSE15735_CTRL_VS_HDAC_INHIBITOR_TREATED_CD4_TCELL_2H_UP	Details ...	46	-0.425824	-1.76876	0	0.0284127	1	1269	tags=52%, list=26%, signal=70%
GOBP_POSITIVE_REGULATION_OF_DNA_BINDING_TRANSCRIPTION_FACTOR_ACTIVITY	GOBP_POSITIVE_REGULATION_OF_DNA_BINDING_TRANSCRIPTION_FACTOR_ACTIVITY	Details ...	73	-0.409896	-1.76872	0	0.02841	1	1136	tags=42%, list=23%, signal=55%
GSE11864_CSF1_PAM3CYS_VS_CSF1_IFNG_PAM3CYS_IN_MAC_DN	GSE11864_CSF1_PAM3CYS_VS_CSF1_IFNG_PAM3CYS_IN_MAC_DN	Details ...	58	-0.41778	-1.76803	0	0.0285959	1	1200	tags=48%, list=25%, signal=63%
HOSHIDA_LIVER_CANCER_LATE_RECURRENCE_UP	HOSHIDA_LIVER_CANCER_LATE_RECURRENCE_UP	Details ...	18	-0.581463	-1.76777	0	0.0286083	1	747	tags=44%, list=15%, signal=52%
GOMF_GLYCOSAMINOGLYCAN_BINDING	GOMF_GLYCOSAMINOGLYCAN_BINDING	Details ...	62	-0.430861	-1.76775	0	0.0285905	1	624	tags=45%, list=13%, signal=51%
GOBP_NEGATIVE_REGULATION_OF_HEMOPOIESIS	GOBP_NEGATIVE_REGULATION_OF_HEMOPOIESIS	Details ...	37	-0.462452	-1.76739	0	0.0286631	1	759	tags=41%, list=16%, signal=48%
GSE29618_BCELL_VS_PDC_DN	GSE29618_BCELL_VS_PDC_DN	Details ...	63	-0.425844	-1.767	0	0.0288035	1	1149	tags=49%, list=24%, signal=64%
GOBP_NEGATIVE_REGULATION_OF_INTRINSIC_APOPTOTIC_SIGNALING_PATHWAY	GOBP_NEGATIVE_REGULATION_OF_INTRINSIC_APOPTOTIC_SIGNALING_PATHWAY	Details ...	31	-0.505449	-1.76677	0	0.0288201	1	1095	tags=45%, list=22%, signal=58%
WP_INTEGRINMEDIATED_CELL_ADHESION	WP_INTEGRINMEDIATED_CELL_ADHESION	Details ...	37	-0.453991	-1.7666	0	0.0288474	1	813	tags=38%, list=17%, signal=45%
JAEGER_METASTASIS_DN	JAEGER_METASTASIS_DN	Details ...	54	-0.427557	-1.76647	0	0.0288742	1	575	tags=39%, list=12%, signal=44%
GOLDRATH_ANTIGEN_RESPONSE	GOLDRATH_ANTIGEN_RESPONSE	Details ...	128	-0.366173	-1.76629	0	0.0288757	1	1319	tags=44%, list=27%, signal=58%
VERHAAK_AML_WITH_NPM1_MUTATED_DN	VERHAAK_AML_WITH_NPM1_MUTATED_DN	Details ...	73	-0.411321	-1.76598	0	0.0289176	1	1092	tags=53%, list=22%, signal=68%
HP_ECTOPIA_LENTIS	HP_ECTOPIA_LENTIS	Details ...	15	-0.615254	-1.7658	0	0.0289594	1	844	tags=53%, list=17%, signal=64%
GOBP_NEGATIVE_REGULATION_OF_EPITHELIAL_CELL_PROLIFERATION	GOBP_NEGATIVE_REGULATION_OF_EPITHELIAL_CELL_PROLIFERATION	Details ...	33	-0.512295	-1.76531	0	0.0290134	1	805	tags=55%, list=16%, signal=65%
GOBP_INTERLEUKIN_6_PRODUCTION	GOBP_INTERLEUKIN_6_PRODUCTION	Details ...	40	-0.466539	-1.76512	0	0.0290477	1	652	tags=38%, list=13%, signal=43%
GOBP_REGULATION_OF_INFLAMMATORY_RESPONSE	GOBP_REGULATION_OF_INFLAMMATORY_RESPONSE	Details ...	95	-0.385559	-1.76424	0	0.0292176	1	650	tags=28%, list=13%, signal=32%
HP_CUTIS_MARMORATA	HP_CUTIS_MARMORATA	Details ...	22	-0.543792	-1.76419	0	0.0292069	1	648	tags=41%, list=13%, signal=47%
REACTOME_SIGNALING_BY_INTERLEUKINS	REACTOME_SIGNALING_BY_INTERLEUKINS	Details ...	113	-0.374304	-1.76414	0	0.0291963	1	1401	tags=53%, list=29%, signal=73%
GOBP_EPIDERMAL_CELL_DIFFERENTIATION	GOBP_EPIDERMAL_CELL_DIFFERENTIATION	Details ...	46	-0.458079	-1.76372	0	0.0293051	1	768	tags=39%, list=16%, signal=46%
RUTELLA_RESPONSE_TO_CSF2RB_AND_IL4_UP	RUTELLA_RESPONSE_TO_CSF2RB_AND_IL4_UP	Details ...	103	-0.372654	-1.76372	0	0.029287	1	954	tags=35%, list=20%, signal=43%
GOBP_REGULATION_OF_RHO_PROTEIN_SIGNAL_TRANSDUCTION	GOBP_REGULATION_OF_RHO_PROTEIN_SIGNAL_TRANSDUCTION	Details ...	24	-0.554415	-1.76335	0	0.0293805	1	539	tags=38%, list=11%, signal=42%
GOBP_REGULATION_OF_TOLL_LIKE_RECEPTOR_SIGNALING_PATHWAY	GOBP_REGULATION_OF_TOLL_LIKE_RECEPTOR_SIGNALING_PATHWAY	Details ...	21	-0.515246	-1.76318	0	0.0293922	1	1183	tags=57%, list=24%, signal=75%
HALLMARK_ALLOGRAFT_REJECTION	HALLMARK_ALLOGRAFT_REJECTION	Details ...	51	-0.430563	-1.76311	0	0.0293816	1	843	tags=39%, list=17%, signal=47%
HP_SKIN_ULCER	HP_SKIN_ULCER	Details ...	29	-0.496297	-1.76288	0	0.0293975	1	925	tags=48%, list=19%, signal=59%
GSE2405_0H_VS_24H_A_PHAGOCYTOPHILUM_STIM_NEUTROPHIL_DN	GSE2405_0H_VS_24H_A_PHAGOCYTOPHILUM_STIM_NEUTROPHIL_DN	Details ...	61	-0.431395	-1.76274	0	0.0294388	1	1022	tags=41%, list=21%, signal=51%
GOBP_TEMPERATURE_HOMEOSTASIS	GOBP_TEMPERATURE_HOMEOSTASIS	Details ...	42	-0.479819	-1.76264	0	0.029495	1	803	tags=40%, list=16%, signal=48%
WIELAND_UP_BY_HBV_INFECTION	WIELAND_UP_BY_HBV_INFECTION	Details ...	32	-0.490934	-1.76236	0	0.0295214	1	956	tags=47%, list=20%, signal=58%
GSE44649_WT_VS_MIR155_KO_ACTIVATED_CD8_TCELL_UP	GSE44649_WT_VS_MIR155_KO_ACTIVATED_CD8_TCELL_UP	Details ...	60	-0.417835	-1.76187	0	0.0295995	1	1191	tags=48%, list=24%, signal=63%
MARTINEZ_RESPONSE_TO_TRABECTEDIN_UP	MARTINEZ_RESPONSE_TO_TRABECTEDIN_UP	Details ...	21	-0.572586	-1.76178	0	0.029611	1	855	tags=52%, list=18%, signal=63%
DESCARTES_FETAL_EYE_SKELETAL_MUSCLE_CELLS	DESCARTES_FETAL_EYE_SKELETAL_MUSCLE_CELLS	Details ...	31	-0.491288	-1.76157	0	0.029634	1	486	tags=35%, list=10%, signal=39%
HP_ABNORMAL_AORTIC_MORPHOLOGY	HP_ABNORMAL_AORTIC_MORPHOLOGY	Details ...	87	-0.401427	-1.7615	0	0.0296306	1	652	tags=25%, list=13%, signal=29%
HP_CONTRACTURES_OF_THE_JOINTS_OF_THE_UPPER_LIMBS	HP_CONTRACTURES_OF_THE_JOINTS_OF_THE_UPPER_LIMBS	Details ...	80	-0.409165	-1.76068	0	0.029801	1	831	tags=33%, list=17%, signal=39%
BROCKE_APOPTOSIS_REVERSED_BY_IL6	BROCKE_APOPTOSIS_REVERSED_BY_IL6	Details ...	59	-0.410446	-1.75982	0	0.0300561	1	1326	tags=56%, list=27%, signal=76%
GSE42021_TREG_PLN_VS_CD24INT_TREG_THYMUS_UP	GSE42021_TREG_PLN_VS_CD24INT_TREG_THYMUS_UP	Details ...	66	-0.433445	-1.75957	0	0.0300893	1	1210	tags=48%, list=25%, signal=64%
GOBP_ACTOMYOSIN_STRUCTURE_ORGANIZATION	GOBP_ACTOMYOSIN_STRUCTURE_ORGANIZATION	Details ...	58	-0.436523	-1.75932	0	0.0301003	1	914	tags=41%, list=19%, signal=50%
HP_ABNORMAL_CORNEAL_EPITHELIUM_MORPHOLOGY	HP_ABNORMAL_CORNEAL_EPITHELIUM_MORPHOLOGY	Details ...	30	-0.483184	-1.75904	0	0.0301371	1	1552	tags=73%, list=32%, signal=107%
GSE32986_CURDLAN_LOWDOSE_VS_CURDLAN_HIGHDOSE_STIM_DC_DN	GSE32986_CURDLAN_LOWDOSE_VS_CURDLAN_HIGHDOSE_STIM_DC_DN	Details ...	60	-0.399222	-1.75901	0	0.0301261	1	1213	tags=47%, list=25%, signal=61%
GSE16450_CTRL_VS_IFNA_6H_STIM_MATURE_NEURON_CELL_LINE_UP	GSE16450_CTRL_VS_IFNA_6H_STIM_MATURE_NEURON_CELL_LINE_UP	Details ...	43	-0.476191	-1.75887	0	0.0301517	1	590	tags=37%, list=12%, signal=42%
GOBP_ACTIN_FILAMENT_ORGANIZATION	GOBP_ACTIN_FILAMENT_ORGANIZATION	Details ...	132	-0.367804	-1.75833	0	0.0302947	1	1230	tags=49%, list=25%, signal=64%
ZHOU_INFLAMMATORY_RESPONSE_FIMA_UP	ZHOU_INFLAMMATORY_RESPONSE_FIMA_UP	Details ...	134	-0.36041	-1.75761	0	0.0305032	1	670	tags=31%, list=14%, signal=35%
GOBP_POSITIVE_REGULATION_OF_PEPTIDE_SECRETION	GOBP_POSITIVE_REGULATION_OF_PEPTIDE_SECRETION	Details ...	29	-0.487055	-1.75756	0	0.0304994	1	1353	tags=59%, list=28%, signal=81%
AIZARANI_LIVER_C9_LSECS_1	AIZARANI_LIVER_C9_LSECS_1	Details ...	97	-0.384909	-1.75744	0	0.0305027	1	1215	tags=53%, list=25%, signal=69%
GOBP_AUTOPHAGOSOME_ORGANIZATION	GOBP_AUTOPHAGOSOME_ORGANIZATION	Details ...	36	-0.443285	-1.7574	0	0.0304842	1	2101	tags=86%, list=43%, signal=150%
GOBP_REGULATION_OF_IMMUNE_EFFECTOR_PROCESS	GOBP_REGULATION_OF_IMMUNE_EFFECTOR_PROCESS	Details ...	93	-0.394678	-1.75721	0	0.0305095	1	832	tags=34%, list=17%, signal=41%
HP_HERNIA	HP_HERNIA	Details ...	128	-0.359114	-1.75644	0	0.0307359	1	659	tags=25%, list=13%, signal=28%
GOBP_POSITIVE_REGULATION_OF_AUTOPHAGY	GOBP_POSITIVE_REGULATION_OF_AUTOPHAGY	Details ...	40	-0.435856	-1.75631	0	0.030783	1	1585	tags=60%, list=32%, signal=88%
GOBP_POSITIVE_REGULATION_OF_MAPK_CASCADE	GOBP_POSITIVE_REGULATION_OF_MAPK_CASCADE	Details ...	128	-0.37348	-1.75596	0	0.0308477	1	863	tags=34%, list=18%, signal=41%
GOBP_NEGATIVE_REGULATION_OF_CATALYTIC_ACTIVITY	GOBP_NEGATIVE_REGULATION_OF_CATALYTIC_ACTIVITY	Details ...	191	-0.342626	-1.75588	0	0.0308655	1	1103	tags=37%, list=23%, signal=45%
GSE19198_1H_VS_6H_IL21_TREATED_TCELL_DN	GSE19198_1H_VS_6H_IL21_TREATED_TCELL_DN	Details ...	60	-0.422707	-1.75583	0	0.0308468	1	818	tags=35%, list=17%, signal=42%
GOBP_NEGATIVE_REGULATION_OF_HYDROLASE_ACTIVITY	GOBP_NEGATIVE_REGULATION_OF_HYDROLASE_ACTIVITY	Details ...	99	-0.375733	-1.7556	0	0.0308791	1	1086	tags=40%, list=22%, signal=51%
GSE22886_NAIVE_TCELL_VS_NEUTROPHIL_DN	GSE22886_NAIVE_TCELL_VS_NEUTROPHIL_DN	Details ...	46	-0.444582	-1.75546	0	0.0308824	1	1159	tags=52%, list=24%, signal=68%
GOBP_POSITIVE_REGULATION_OF_COLD_INDUCED_THERMOGENESIS	GOBP_POSITIVE_REGULATION_OF_COLD_INDUCED_THERMOGENESIS	Details ...	26	-0.50991	-1.75518	0	0.0309582	1	803	tags=46%, list=16%, signal=55%
GOBP_NEGATIVE_REGULATION_OF_DEVELOPMENTAL_PROCESS	GOBP_NEGATIVE_REGULATION_OF_DEVELOPMENTAL_PROCESS	Details ...	229	-0.344494	-1.75471	0	0.0310335	1	649	tags=30%, list=13%, signal=33%
GOBP_REGULATION_OF_INTRACELLULAR_SIGNAL_TRANSDUCTION	GOBP_REGULATION_OF_INTRACELLULAR_SIGNAL_TRANSDUCTION	Details ...	491	-0.319135	-1.75443	0	0.0310947	1	1183	tags=37%, list=24%, signal=44%
GSE2706_UNSTIM_VS_2H_LPS_AND_R848_DC_DN	GSE2706_UNSTIM_VS_2H_LPS_AND_R848_DC_DN	Details ...	47	-0.435238	-1.75414	0	0.0311557	1	619	tags=34%, list=13%, signal=39%
GSE22033_UNTREATED_VS_ROSIGLITAZONE_TREATED_MEF_DN	GSE22033_UNTREATED_VS_ROSIGLITAZONE_TREATED_MEF_DN	Details ...	62	-0.403367	-1.75408	0	0.0311441	1	1052	tags=40%, list=22%, signal=51%
GSE11057_NAIVE_CD4_VS_PBMC_CD4_TCELL_DN	GSE11057_NAIVE_CD4_VS_PBMC_CD4_TCELL_DN	Details ...	59	-0.412203	-1.75385	0	0.0311908	1	1895	tags=75%, list=39%, signal=120%
MIR4679	MIR4679	Details ...	43	-0.485937	-1.75374	0	0.031204	1	460	tags=35%, list=9%, signal=38%
GOBP_POSITIVE_REGULATION_OF_RECEPTOR_MEDIATED_ENDOCYTOSIS	GOBP_POSITIVE_REGULATION_OF_RECEPTOR_MEDIATED_ENDOCYTOSIS	Details ...	15	-0.591213	-1.75371	0	0.0311926	1	698	tags=47%, list=14%, signal=54%
HP_LIPODYSTROPHY	HP_LIPODYSTROPHY	Details ...	28	-0.521593	-1.75361	0	0.0312319	1	356	tags=36%, list=7%, signal=38%
GSE2706_2H_VS_8H_R848_STIM_DC_UP	GSE2706_2H_VS_8H_R848_STIM_DC_UP	Details ...	59	-0.417189	-1.75355	0	0.0312421	1	971	tags=44%, list=20%, signal=54%
GOBP_REGULATION_OF_RESPONSE_TO_STRESS	GOBP_REGULATION_OF_RESPONSE_TO_STRESS	Details ...	365	-0.33578	-1.75278	0	0.0314788	1	1196	tags=37%, list=24%, signal=46%
HP_ABNORMAL_INFLAMMATORY_RESPONSE	HP_ABNORMAL_INFLAMMATORY_RESPONSE	Details ...	224	-0.34451	-1.75229	0	0.0315853	1	680	tags=24%, list=14%, signal=27%
HP_NEOPLASM_OF_THE_SKIN	HP_NEOPLASM_OF_THE_SKIN	Details ...	51	-0.431024	-1.75221	0	0.0315809	1	617	tags=27%, list=13%, signal=31%
GSE40274_HELIOS_VS_FOXP3_AND_HELIOS_TRANSDUCED_ACTIVATED_CD4_TCELL_UP	GSE40274_HELIOS_VS_FOXP3_AND_HELIOS_TRANSDUCED_ACTIVATED_CD4_TCELL_UP	Details ...	49	-0.43858	-1.75055	0	0.0320086	1	1041	tags=47%, list=21%, signal=59%
GSE1460_INTRATHYMIC_T_PROGENITOR_VS_DP_THYMOCYTE_DN	GSE1460_INTRATHYMIC_T_PROGENITOR_VS_DP_THYMOCYTE_DN	Details ...	51	-0.437879	-1.75053	0	0.0319895	1	958	tags=41%, list=20%, signal=51%
GOBP_TUMOR_NECROSIS_FACTOR_SUPERFAMILY_CYTOKINE_PRODUCTION	GOBP_TUMOR_NECROSIS_FACTOR_SUPERFAMILY_CYTOKINE_PRODUCTION	Details ...	47	-0.450972	-1.75029	0	0.0320565	1	558	tags=30%, list=11%, signal=33%
TRAVAGLINI_LUNG_BASOPHIL_MAST_2_CELL	TRAVAGLINI_LUNG_BASOPHIL_MAST_2_CELL	Details ...	154	-0.353368	-1.74967	0	0.0322382	1	1412	tags=48%, list=29%, signal=65%
NAKAMURA_TUMOR_ZONE_PERIPHERAL_VS_CENTRAL_DN	NAKAMURA_TUMOR_ZONE_PERIPHERAL_VS_CENTRAL_DN	Details ...	189	-0.353655	-1.74935	0	0.0322714	1	1033	tags=37%, list=21%, signal=45%
BOSCO_INTERFERON_INDUCED_ANTIVIRAL_MODULE	BOSCO_INTERFERON_INDUCED_ANTIVIRAL_MODULE	Details ...	23	-0.498165	-1.74935	0	0.0322522	1	1410	tags=70%, list=29%, signal=97%
GSE20727_ROS_INH_VS_ROS_INH_AND_DNFB_ALLERGEN_TREATED_DC_UP	GSE20727_ROS_INH_VS_ROS_INH_AND_DNFB_ALLERGEN_TREATED_DC_UP	Details ...	67	-0.409826	-1.74935	0	0.0322402	1	1326	tags=48%, list=27%, signal=65%
GSE21670_STAT3_KO_VS_WT_CD4_TCELL_IL6_TREATED_DN	GSE21670_STAT3_KO_VS_WT_CD4_TCELL_IL6_TREATED_DN	Details ...	41	-0.476829	-1.74931	0	0.0322283	1	936	tags=51%, list=19%, signal=63%
GOBP_REGULATION_OF_ANATOMICAL_STRUCTURE_MORPHOGENESIS	GOBP_REGULATION_OF_ANATOMICAL_STRUCTURE_MORPHOGENESIS	Details ...	266	-0.332265	-1.74886	0	0.0323187	1	1030	tags=36%, list=21%, signal=44%
GSE3982_DC_VS_EFF_MEMORY_CD4_TCELL_UP	GSE3982_DC_VS_EFF_MEMORY_CD4_TCELL_UP	Details ...	63	-0.406726	-1.74877	0	0.0323161	1	1485	tags=60%, list=30%, signal=86%
MSX1_01	MSX1_01	Details ...	57	-0.421067	-1.7486	0	0.0323397	1	615	tags=32%, list=13%, signal=36%
CUI_DEVELOPING_HEART_C5_VALVAR_CELL	CUI_DEVELOPING_HEART_C5_VALVAR_CELL	Details ...	84	-0.395981	-1.74801	0	0.0324654	1	619	tags=37%, list=13%, signal=42%
GOBP_PROTEIN_MATURATION	GOBP_PROTEIN_MATURATION	Details ...	75	-0.395033	-1.74765	0	0.0325124	1	768	tags=33%, list=16%, signal=39%
GOMF_PEPTIDASE_ACTIVITY	GOMF_PEPTIDASE_ACTIVITY	Details ...	112	-0.367835	-1.74741	0	0.0325501	1	724	tags=27%, list=15%, signal=31%
GOBP_REGULATION_OF_IMMUNE_SYSTEM_PROCESS	GOBP_REGULATION_OF_IMMUNE_SYSTEM_PROCESS	Details ...	348	-0.328101	-1.74717	0	0.0325947	1	1212	tags=36%, list=25%, signal=44%
GOBP_REGULATION_OF_ACTIN_FILAMENT_BASED_PROCESS	GOBP_REGULATION_OF_ACTIN_FILAMENT_BASED_PROCESS	Details ...	119	-0.394271	-1.7471	0	0.0325827	1	1231	tags=49%, list=25%, signal=64%
GSE17721_PAM3CSK4_VS_CPG_4H_BMDC_DN	GSE17721_PAM3CSK4_VS_CPG_4H_BMDC_DN	Details ...	56	-0.416477	-1.7468	0	0.0326132	1	640	tags=29%, list=13%, signal=33%
LAKE_ADULT_KIDNEY_C10_THIN_ASCENDING_LIMB	LAKE_ADULT_KIDNEY_C10_THIN_ASCENDING_LIMB	Details ...	132	-0.364181	-1.74647	0	0.0326719	1	1586	tags=50%, list=32%, signal=72%
MIR1468_3P	MIR1468_3P	Details ...	155	-0.349431	-1.74596	0	0.0328178	1	1212	tags=42%, list=25%, signal=54%
IRF_Q6	IRF_Q6	Details ...	61	-0.408118	-1.7459	0	0.0328126	1	1134	tags=49%, list=23%, signal=63%
GOBP_POSITIVE_REGULATION_OF_CYTOKINE_PRODUCTION	GOBP_POSITIVE_REGULATION_OF_CYTOKINE_PRODUCTION	Details ...	111	-0.386194	-1.74574	0	0.0328427	1	452	tags=24%, list=9%, signal=26%
GOBP_REGULATION_OF_BIOLOGICAL_PROCESS_INVOLVED_IN_SYMBIOTIC_INTERACTION	GOBP_REGULATION_OF_BIOLOGICAL_PROCESS_INVOLVED_IN_SYMBIOTIC_INTERACTION	Details ...	45	-0.460355	-1.74574	0	0.0328235	1	1088	tags=42%, list=22%, signal=54%
WP_IL18_SIGNALING_PATHWAY	WP_IL18_SIGNALING_PATHWAY	Details ...	77	-0.408261	-1.74561	0	0.0328184	1	814	tags=38%, list=17%, signal=44%
GSE6259_DEC205_POS_DC_VS_BCELL_DN	GSE6259_DEC205_POS_DC_VS_BCELL_DN	Details ...	60	-0.419772	-1.74552	0	0.0327992	1	1640	tags=57%, list=34%, signal=84%
GSE21360_TERTIARY_VS_QUATERNARY_MEMORY_CD8_TCELL_UP	GSE21360_TERTIARY_VS_QUATERNARY_MEMORY_CD8_TCELL_UP	Details ...	47	-0.425558	-1.74479	0	0.0330234	1	768	tags=38%, list=16%, signal=45%
OSF2_Q6	OSF2_Q6	Details ...	67	-0.414757	-1.74431	0	0.0331133	1	519	tags=24%, list=11%, signal=26%
NAKAYA_MONOCYTE_FLUMIST_AGE_18_50YO_7DY_DN	NAKAYA_MONOCYTE_FLUMIST_AGE_18_50YO_7DY_DN	Details ...	73	-0.3956	-1.74361	0	0.0332506	1	1553	tags=55%, list=32%, signal=79%
GSE8921_3H_VS_24H_TLR1_2_STIM_MONOCYTE_DN	GSE8921_3H_VS_24H_TLR1_2_STIM_MONOCYTE_DN	Details ...	57	-0.427434	-1.74351	0	0.0332522	1	938	tags=40%, list=19%, signal=49%
RB_DN.V1_DN	RB_DN.V1_DN	Details ...	38	-0.456893	-1.74289	0	0.0334377	1	1027	tags=47%, list=21%, signal=60%
GSE9006_TYPE_1_VS_TYPE_2_DIABETES_PBMC_AT_DX_DN	GSE9006_TYPE_1_VS_TYPE_2_DIABETES_PBMC_AT_DX_DN	Details ...	57	-0.445094	-1.74278	0	0.0334323	1	1121	tags=40%, list=23%, signal=52%
GOBP_MYELOID_CELL_HOMEOSTASIS	GOBP_MYELOID_CELL_HOMEOSTASIS	Details ...	44	-0.416061	-1.74231	0	0.0335388	1	1268	tags=50%, list=26%, signal=67%
GSE45365_WT_VS_IFNAR_KO_CD8A_DC_DN	GSE45365_WT_VS_IFNAR_KO_CD8A_DC_DN	Details ...	61	-0.421925	-1.7421	0	0.0335895	1	1082	tags=44%, list=22%, signal=56%
SENESE_HDAC3_TARGETS_DN	SENESE_HDAC3_TARGETS_DN	Details ...	161	-0.353454	-1.74147	0	0.0337533	1	1033	tags=33%, list=21%, signal=40%
GSE16266_CTRL_VS_LPS_STIM_MEF_UP	GSE16266_CTRL_VS_LPS_STIM_MEF_UP	Details ...	65	-0.419654	-1.74125	0	0.0338108	1	1382	tags=54%, list=28%, signal=74%
MEISSNER_BRAIN_HCP_WITH_H3K4ME3_AND_H3K27ME3	MEISSNER_BRAIN_HCP_WITH_H3K4ME3_AND_H3K27ME3	Details ...	296	-0.320852	-1.74105	0	0.0338471	1	883	tags=38%, list=18%, signal=44%
KEGG_APOPTOSIS	KEGG_APOPTOSIS	Details ...	27	-0.518979	-1.7398	0	0.0341711	1	1609	tags=74%, list=33%, signal=110%
HP_ABNORMAL_PLEURA_MORPHOLOGY	HP_ABNORMAL_PLEURA_MORPHOLOGY	Details ...	18	-0.549792	-1.73963	0	0.034207	1	784	tags=50%, list=16%, signal=59%
GOBP_MEMORY	GOBP_MEMORY	Details ...	23	-0.529716	-1.73959	0	0.0342011	1	803	tags=48%, list=16%, signal=57%
GOBP_RESPONSE_TO_KETONE	GOBP_RESPONSE_TO_KETONE	Details ...	51	-0.429857	-1.73954	0	0.0341884	1	476	tags=25%, list=10%, signal=28%
REACTOME_ECM_PROTEOGLYCANS	REACTOME_ECM_PROTEOGLYCANS	Details ...	29	-0.504565	-1.73949	0	0.0341896	1	753	tags=59%, list=15%, signal=69%
PRC2_EZH2_UP.V1_UP	PRC2_EZH2_UP.V1_UP	Details ...	50	-0.419992	-1.73943	0	0.0341907	1	1077	tags=52%, list=22%, signal=66%
GSE17721_LPS_VS_PAM3CSK4_2H_BMDC_UP	GSE17721_LPS_VS_PAM3CSK4_2H_BMDC_UP	Details ...	49	-0.426279	-1.73841	0	0.0345051	1	631	tags=33%, list=13%, signal=37%
GSE2706_R848_VS_R848_AND_LPS_2H_STIM_DC_DN	GSE2706_R848_VS_R848_AND_LPS_2H_STIM_DC_DN	Details ...	57	-0.455514	-1.73834	0	0.0344922	1	615	tags=35%, list=13%, signal=40%
GOBP_EPITHELIAL_CELL_DIFFERENTIATION	GOBP_EPITHELIAL_CELL_DIFFERENTIATION	Details ...	158	-0.3487	-1.73821	0	0.0345071	1	1167	tags=44%, list=24%, signal=56%
ANDERSEN_CHOLANGIOCARCINOMA_CLASS1	ANDERSEN_CHOLANGIOCARCINOMA_CLASS1	Details ...	16	-0.585627	-1.73795	0	0.0345358	1	481	tags=44%, list=10%, signal=48%
TRAYNOR_RETT_SYNDROM_UP	TRAYNOR_RETT_SYNDROM_UP	Details ...	15	-0.566975	-1.73751	0	0.0345872	1	831	tags=53%, list=17%, signal=64%
GOBP_INTRACELLULAR_RECEPTOR_SIGNALING_PATHWAY	GOBP_INTRACELLULAR_RECEPTOR_SIGNALING_PATHWAY	Details ...	84	-0.380034	-1.73715	0	0.0346918	1	1597	tags=55%, list=33%, signal=80%
HP_ABNORMAL_AORTIC_VALVE_MORPHOLOGY	HP_ABNORMAL_AORTIC_VALVE_MORPHOLOGY	Details ...	44	-0.43067	-1.73687	0	0.0347068	1	652	tags=30%, list=13%, signal=34%
MIR25_3P	MIR25_3P	Details ...	107	-0.357209	-1.73643	0	0.034847	1	1579	tags=56%, list=32%, signal=81%
HP_PAPULE	HP_PAPULE	Details ...	21	-0.573617	-1.73627	0	0.0348752	1	784	tags=52%, list=16%, signal=62%
GSE14415_INDUCED_VS_NATURAL_TREG_UP	GSE14415_INDUCED_VS_NATURAL_TREG_UP	Details ...	41	-0.458466	-1.73626	0	0.0348553	1	826	tags=39%, list=17%, signal=47%
GOBP_LENS_DEVELOPMENT_IN_CAMERA_TYPE_EYE	GOBP_LENS_DEVELOPMENT_IN_CAMERA_TYPE_EYE	Details ...	20	-0.508859	-1.73585	0	0.0349802	1	1105	tags=60%, list=23%, signal=77%
GSE9650_NAIVE_VS_EXHAUSTED_CD8_TCELL_DN	GSE9650_NAIVE_VS_EXHAUSTED_CD8_TCELL_DN	Details ...	56	-0.434645	-1.73533	0	0.0350913	1	619	tags=30%, list=13%, signal=34%
DITTMER_PTHLH_TARGETS_DN	DITTMER_PTHLH_TARGETS_DN	Details ...	22	-0.5663	-1.73527	0	0.035072	1	783	tags=41%, list=16%, signal=48%
GOCC_LAMELLIPODIUM	GOCC_LAMELLIPODIUM	Details ...	69	-0.396749	-1.73521	0	0.0350589	1	1230	tags=45%, list=25%, signal=59%
MIR642A_3P_MIR642B_3P	MIR642A_3P_MIR642B_3P	Details ...	38	-0.478811	-1.73505	0	0.0351006	1	1231	tags=53%, list=25%, signal=70%
GOMF_ENZYME_INHIBITOR_ACTIVITY	GOMF_ENZYME_INHIBITOR_ACTIVITY	Details ...	80	-0.388825	-1.73463	0	0.0352325	1	877	tags=35%, list=18%, signal=42%
GSE21033_CTRL_VS_POLYIC_STIM_DC_1H_DN	GSE21033_CTRL_VS_POLYIC_STIM_DC_1H_DN	Details ...	46	-0.464123	-1.73345	0	0.0356534	1	1044	tags=50%, list=21%, signal=63%
GOBP_UROGENITAL_SYSTEM_DEVELOPMENT	GOBP_UROGENITAL_SYSTEM_DEVELOPMENT	Details ...	92	-0.373742	-1.73296	0	0.0358253	1	648	tags=34%, list=13%, signal=38%
MIR32_5P	MIR32_5P	Details ...	125	-0.360785	-1.73241	0	0.0360175	1	1682	tags=61%, list=34%, signal=90%
HP_CARDIOMEGALY	HP_CARDIOMEGALY	Details ...	35	-0.472963	-1.73236	0	0.0360107	1	864	tags=40%, list=18%, signal=48%
GSE9960_GRAM_NEG_VS_GRAM_POS_SEPSIS_PBMC_UP	GSE9960_GRAM_NEG_VS_GRAM_POS_SEPSIS_PBMC_UP	Details ...	51	-0.423334	-1.73234	0	0.0359902	1	680	tags=33%, list=14%, signal=38%
WP_PI3KAKT_SIGNALING_PATHWAY	WP_PI3KAKT_SIGNALING_PATHWAY	Details ...	92	-0.406812	-1.7318	0	0.0361137	1	745	tags=37%, list=15%, signal=43%
GSE24634_TEFF_VS_TCONV_DAY7_IN_CULTURE_DN	GSE24634_TEFF_VS_TCONV_DAY7_IN_CULTURE_DN	Details ...	63	-0.438383	-1.73138	0	0.0362435	1	1475	tags=57%, list=30%, signal=81%
TSAI_RESPONSE_TO_IONIZING_RADIATION	TSAI_RESPONSE_TO_IONIZING_RADIATION	Details ...	45	-0.452705	-1.7311	0	0.0362914	1	1097	tags=44%, list=22%, signal=57%
GOBP_NEGATIVE_REGULATION_OF_CELL_ADHESION	GOBP_NEGATIVE_REGULATION_OF_CELL_ADHESION	Details ...	95	-0.382118	-1.73064	0	0.0364551	1	833	tags=38%, list=17%, signal=45%
REACTOME_INNATE_IMMUNE_SYSTEM	REACTOME_INNATE_IMMUNE_SYSTEM	Details ...	241	-0.336703	-1.73	0	0.0366457	1	1651	tags=51%, list=34%, signal=74%
SWEET_LUNG_CANCER_KRAS_UP	SWEET_LUNG_CANCER_KRAS_UP	Details ...	140	-0.354171	-1.72991	0	0.0366317	1	890	tags=34%, list=18%, signal=40%
WP_EGFR_TYROSINE_KINASE_INHIBITOR_RESISTANCE	WP_EGFR_TYROSINE_KINASE_INHIBITOR_RESISTANCE	Details ...	30	-0.483777	-1.72964	0	0.0366378	1	1396	tags=60%, list=29%, signal=83%
GSE360_HIGH_DOSE_B_MALAYI_VS_M_TUBERCULOSIS_DC_DN	GSE360_HIGH_DOSE_B_MALAYI_VS_M_TUBERCULOSIS_DC_DN	Details ...	49	-0.4177	-1.72954	0	0.0366444	1	1052	tags=45%, list=22%, signal=57%
KEGG_CALCIUM_SIGNALING_PATHWAY	KEGG_CALCIUM_SIGNALING_PATHWAY	Details ...	38	-0.458844	-1.72934	0	0.0367051	1	504	tags=32%, list=10%, signal=35%
CREIGHTON_ENDOCRINE_THERAPY_RESISTANCE_5	CREIGHTON_ENDOCRINE_THERAPY_RESISTANCE_5	Details ...	140	-0.352789	-1.72859	0	0.0368877	1	1397	tags=52%, list=29%, signal=71%
SEKI_INFLAMMATORY_RESPONSE_LPS_UP	SEKI_INFLAMMATORY_RESPONSE_LPS_UP	Details ...	18	-0.544206	-1.72842	0	0.036935	1	785	tags=61%, list=16%, signal=73%
GOBP_REGULATION_OF_HEART_RATE	GOBP_REGULATION_OF_HEART_RATE	Details ...	22	-0.530291	-1.72706	0	0.0373663	1	191	tags=32%, list=4%, signal=33%
GSE17974_CTRL_VS_ACT_IL4_AND_ANTI_IL12_12H_CD4_TCELL_UP	GSE17974_CTRL_VS_ACT_IL4_AND_ANTI_IL12_12H_CD4_TCELL_UP	Details ...	47	-0.444252	-1.72671	0	0.0374666	1	1009	tags=49%, list=21%, signal=61%
GSE34006_A2AR_KO_VS_A2AR_AGONIST_TREATED_TREG_UP	GSE34006_A2AR_KO_VS_A2AR_AGONIST_TREATED_TREG_UP	Details ...	70	-0.409198	-1.7267	0	0.0374314	1	1654	tags=63%, list=34%, signal=94%
GSE3982_MEMORY_CD4_TCELL_VS_TH2_UP	GSE3982_MEMORY_CD4_TCELL_VS_TH2_UP	Details ...	52	-0.438471	-1.72648	0	0.0374571	1	1195	tags=48%, list=24%, signal=63%
HOELZEL_NF1_TARGETS_UP	HOELZEL_NF1_TARGETS_UP	Details ...	44	-0.42205	-1.72635	0	0.0374692	1	885	tags=50%, list=18%, signal=61%
GOBP_MUSCLE_CONTRACTION	GOBP_MUSCLE_CONTRACTION	Details ...	89	-0.398404	-1.72556	0	0.0377021	1	504	tags=27%, list=10%, signal=30%
GSE42021_TCONV_PLN_VS_TREG_PRECURSORS_THYMUS_UP	GSE42021_TCONV_PLN_VS_TREG_PRECURSORS_THYMUS_UP	Details ...	65	-0.429295	-1.72534	0	0.0377274	1	926	tags=42%, list=19%, signal=51%
GSE26928_NAIVE_VS_EFF_MEMORY_CD4_TCELL_DN	GSE26928_NAIVE_VS_EFF_MEMORY_CD4_TCELL_DN	Details ...	71	-0.422225	-1.72532	0	0.0377064	1	951	tags=41%, list=19%, signal=50%
ROSS_AML_WITH_CBFB_MYH11_FUSION	ROSS_AML_WITH_CBFB_MYH11_FUSION	Details ...	15	-0.585292	-1.72515	0	0.0377123	1	787	tags=47%, list=16%, signal=55%
GSE18791_CTRL_VS_NEWCASTLE_VIRUS_DC_10H_DN	GSE18791_CTRL_VS_NEWCASTLE_VIRUS_DC_10H_DN	Details ...	52	-0.42276	-1.72513	0	0.0376704	1	1484	tags=60%, list=30%, signal=85%
GSE37533_UNTREATED_VS_PIOGLIZATONE_TREATED_CD4_TCELL_FOXP3_TRASDUCED_CD4_TCELL_DN	GSE37533_UNTREATED_VS_PIOGLIZATONE_TREATED_CD4_TCELL_FOXP3_TRASDUCED_CD4_TCELL_DN	Details ...	34	-0.462181	-1.72513	0	0.0376495	1	713	tags=32%, list=15%, signal=38%
GOBP_RHO_PROTEIN_SIGNAL_TRANSDUCTION	GOBP_RHO_PROTEIN_SIGNAL_TRANSDUCTION	Details ...	42	-0.439978	-1.72486	0	0.0377089	1	1178	tags=52%, list=24%, signal=68%
GSE360_T_GONDII_VS_M_TUBERCULOSIS_MAC_DN	GSE360_T_GONDII_VS_M_TUBERCULOSIS_MAC_DN	Details ...	50	-0.422207	-1.72472	0	0.0377282	1	1238	tags=58%, list=25%, signal=77%
UZONYI_RESPONSE_TO_LEUKOTRIENE_AND_THROMBIN	UZONYI_RESPONSE_TO_LEUKOTRIENE_AND_THROMBIN	Details ...	16	-0.579829	-1.72451	0	0.0377677	1	619	tags=56%, list=13%, signal=64%
LAKE_ADULT_KIDNEY_C18_COLLECTING_DUCT_PRINCIPAL_CELLS_MEDULLA	LAKE_ADULT_KIDNEY_C18_COLLECTING_DUCT_PRINCIPAL_CELLS_MEDULLA	Details ...	117	-0.375558	-1.72448	0	0.0377601	1	1138	tags=38%, list=23%, signal=48%
DEURIG_T_CELL_PROLYMPHOCYTIC_LEUKEMIA_DN	DEURIG_T_CELL_PROLYMPHOCYTIC_LEUKEMIA_DN	Details ...	91	-0.37404	-1.72431	0	0.0377525	1	1430	tags=51%, list=29%, signal=70%
GOBP_MAPK_CASCADE	GOBP_MAPK_CASCADE	Details ...	227	-0.338848	-1.72411	0	0.0377919	1	787	tags=29%, list=16%, signal=33%
GOBP_REGULATION_OF_APOPTOTIC_SIGNALING_PATHWAY	GOBP_REGULATION_OF_APOPTOTIC_SIGNALING_PATHWAY	Details ...	97	-0.378606	-1.72406	0	0.037791	1	1025	tags=36%, list=21%, signal=45%
GOBP_NEGATIVE_REGULATION_OF_PROTEIN_BINDING	GOBP_NEGATIVE_REGULATION_OF_PROTEIN_BINDING	Details ...	25	-0.510686	-1.7238	0	0.0378235	1	311	tags=24%, list=6%, signal=26%
GSE29949_MICROGLIA_BRAIN_VS_MONOCYTE_BONE_MARROW_UP	GSE29949_MICROGLIA_BRAIN_VS_MONOCYTE_BONE_MARROW_UP	Details ...	46	-0.443493	-1.72373	0	0.0378018	1	1163	tags=54%, list=24%, signal=71%
REACTOME_INTERLEUKIN_4_AND_INTERLEUKIN_13_SIGNALING	REACTOME_INTERLEUKIN_4_AND_INTERLEUKIN_13_SIGNALING	Details ...	28	-0.490454	-1.72371	0	0.0377734	1	1176	tags=68%, list=24%, signal=89%
SESTO_RESPONSE_TO_UV_C2	SESTO_RESPONSE_TO_UV_C2	Details ...	17	-0.556283	-1.72367	0	0.0377593	1	1067	tags=53%, list=22%, signal=68%
GSE3982_MAC_VS_NKCELL_UP	GSE3982_MAC_VS_NKCELL_UP	Details ...	59	-0.410601	-1.72359	0	0.0377717	1	926	tags=37%, list=19%, signal=45%
GSE9037_WT_VS_IRAK4_KO_LPS_1H_STIM_BMDM_UP	GSE9037_WT_VS_IRAK4_KO_LPS_1H_STIM_BMDM_UP	Details ...	32	-0.465163	-1.72348	0	0.0377842	1	845	tags=41%, list=17%, signal=49%
GSE35685_CD34POS_CD38NEG_VS_CD34POS_CD10POS_BONE_MARROW_DN	GSE35685_CD34POS_CD38NEG_VS_CD34POS_CD10POS_BONE_MARROW_DN	Details ...	71	-0.412771	-1.72344	0	0.03777	1	1406	tags=55%, list=29%, signal=76%
GSE7348_UNSTIM_VS_TOLERIZED_AND_LPS_STIM_MACROPHAGE_DN	GSE7348_UNSTIM_VS_TOLERIZED_AND_LPS_STIM_MACROPHAGE_DN	Details ...	45	-0.42361	-1.72317	0	0.0378551	1	992	tags=44%, list=20%, signal=55%
HP_PAIN	HP_PAIN	Details ...	169	-0.344275	-1.72156	0	0.0382553	1	831	tags=28%, list=17%, signal=33%
FAN_EMBRYONIC_CTX_BRAIN_NAIVE_LIKE_T_CELL	FAN_EMBRYONIC_CTX_BRAIN_NAIVE_LIKE_T_CELL	Details ...	39	-0.466057	-1.72147	0	0.0382608	1	1019	tags=49%, list=21%, signal=61%
ZHONG_PFC_MAJOR_TYPES_MICROGLIA	ZHONG_PFC_MAJOR_TYPES_MICROGLIA	Details ...	131	-0.355847	-1.72129	0	0.0382914	1	1415	tags=55%, list=29%, signal=75%
GSE20715_WT_VS_TLR4_KO_24H_OZONE_LUNG_UP	GSE20715_WT_VS_TLR4_KO_24H_OZONE_LUNG_UP	Details ...	49	-0.426899	-1.72107	0	0.0383233	1	920	tags=41%, list=19%, signal=50%
GOBP_NEGATIVE_REGULATION_OF_LOCOMOTION	GOBP_NEGATIVE_REGULATION_OF_LOCOMOTION	Details ...	84	-0.406707	-1.72083	0	0.0384408	1	877	tags=37%, list=18%, signal=44%
GSE9988_LPS_VS_LPS_AND_ANTI_TREM1_MONOCYTE_DN	GSE9988_LPS_VS_LPS_AND_ANTI_TREM1_MONOCYTE_DN	Details ...	82	-0.392325	-1.72073	0	0.0384529	1	1487	tags=60%, list=30%, signal=84%
GOBP_MACROAUTOPHAGY	GOBP_MACROAUTOPHAGY	Details ...	93	-0.391807	-1.72038	0	0.0385242	1	2101	tags=77%, list=43%, signal=133%
ALFANO_MYC_TARGETS	ALFANO_MYC_TARGETS	Details ...	98	-0.384387	-1.72017	0	0.0385822	1	1149	tags=42%, list=24%, signal=54%
GSE32128_INOS_DEPENDENT_VS_INOS_INDEPENDENT_ACTIVATED_TCELL_UP	GSE32128_INOS_DEPENDENT_VS_INOS_INDEPENDENT_ACTIVATED_TCELL_UP	Details ...	56	-0.422251	-1.72005	0	0.0385744	1	1485	tags=52%, list=30%, signal=74%
GOBP_CELL_ADHESION_MEDIATED_BY_INTEGRIN	GOBP_CELL_ADHESION_MEDIATED_BY_INTEGRIN	Details ...	26	-0.513914	-1.72004	0	0.0385599	1	738	tags=50%, list=15%, signal=59%
GSE2197_IMMUNOSUPPRESSIVE_DNA_VS_UNTREATED_IN_DC_UP	GSE2197_IMMUNOSUPPRESSIVE_DNA_VS_UNTREATED_IN_DC_UP	Details ...	59	-0.435617	-1.71988	0	0.0385981	1	857	tags=42%, list=18%, signal=51%
HARRIS_BRAIN_CANCER_PROGENITORS	HARRIS_BRAIN_CANCER_PROGENITORS	Details ...	21	-0.522185	-1.71897	0	0.0387571	1	689	tags=52%, list=14%, signal=61%
GOBP_REGULATION_OF_ACTIN_FILAMENT_BUNDLE_ASSEMBLY	GOBP_REGULATION_OF_ACTIN_FILAMENT_BUNDLE_ASSEMBLY	Details ...	29	-0.47823	-1.71889	0	0.0387426	1	1312	tags=55%, list=27%, signal=75%
GOBP_EXOCYTOSIS	GOBP_EXOCYTOSIS	Details ...	216	-0.335514	-1.71722	0	0.0392637	1	908	tags=31%, list=19%, signal=36%
GSE18791_UNSTIM_VS_NEWCATSLE_VIRUS_DC_10H_DN	GSE18791_UNSTIM_VS_NEWCATSLE_VIRUS_DC_10H_DN	Details ...	57	-0.436574	-1.71722	0	0.0392424	1	558	tags=33%, list=11%, signal=37%
GSE40273_EOS_KO_VS_WT_TREG_UP	GSE40273_EOS_KO_VS_WT_TREG_UP	Details ...	58	-0.441844	-1.71715	0	0.0392276	1	2077	tags=81%, list=43%, signal=139%
GSE41176_UNSTIM_VS_ANTI_IGM_STIM_BCELL_1H_UP	GSE41176_UNSTIM_VS_ANTI_IGM_STIM_BCELL_1H_UP	Details ...	61	-0.404838	-1.7163	0	0.0395334	1	861	tags=36%, list=18%, signal=43%
KAAB_HEART_ATRIUM_VS_VENTRICLE_UP	KAAB_HEART_ATRIUM_VS_VENTRICLE_UP	Details ...	95	-0.400161	-1.71588	0	0.0395997	1	1230	tags=51%, list=25%, signal=66%
REACTOME_CONSTITUTIVE_SIGNALING_BY_ABERRANT_PI3K_IN_CANCER	REACTOME_CONSTITUTIVE_SIGNALING_BY_ABERRANT_PI3K_IN_CANCER	Details ...	15	-0.568699	-1.71584	0	0.0395764	1	495	tags=40%, list=10%, signal=44%
HP_ABNORMAL_THROMBOSIS	HP_ABNORMAL_THROMBOSIS	Details ...	30	-0.489417	-1.71583	0	0.0395616	1	917	tags=43%, list=19%, signal=53%
GOBP_REPRODUCTIVE_SYSTEM_DEVELOPMENT	GOBP_REPRODUCTIVE_SYSTEM_DEVELOPMENT	Details ...	113	-0.373906	-1.71549	0	0.0396361	1	805	tags=35%, list=16%, signal=41%
GOBP_POSITIVE_REGULATION_OF_CELL_POPULATION_PROLIFERATION	GOBP_POSITIVE_REGULATION_OF_CELL_POPULATION_PROLIFERATION	Details ...	247	-0.335911	-1.71539	0	0.0396258	1	660	tags=27%, list=14%, signal=29%
GOBP_NEGATIVE_REGULATION_OF_PROTEOLYSIS	GOBP_NEGATIVE_REGULATION_OF_PROTEOLYSIS	Details ...	83	-0.396089	-1.71472	0	0.0398307	1	991	tags=37%, list=20%, signal=46%
SCHERER_PBMC_YF_VAX_AGE_18_40YO_JOINT_TO_VACCINIA_AND_YELLOW_FEVER_UP	SCHERER_PBMC_YF_VAX_AGE_18_40YO_JOINT_TO_VACCINIA_AND_YELLOW_FEVER_UP	Details ...	17	-0.578251	-1.71414	0	0.0399892	1	1052	tags=65%, list=22%, signal=82%
GOBP_ANIMAL_ORGAN_REGENERATION	GOBP_ANIMAL_ORGAN_REGENERATION	Details ...	24	-0.524808	-1.71388	0	0.0400651	1	805	tags=42%, list=16%, signal=50%
GSE37301_MULTIPOTENT_PROGENITOR_VS_CD4_TCELL_DN	GSE37301_MULTIPOTENT_PROGENITOR_VS_CD4_TCELL_DN	Details ...	60	-0.396317	-1.71383	0	0.0400566	1	773	tags=25%, list=16%, signal=29%
MIR340_5P	MIR340_5P	Details ...	191	-0.337996	-1.71379	0	0.0400416	1	757	tags=28%, list=15%, signal=32%
GSE22935_UNSTIM_VS_24H_MBOVIS_BCG_STIM_MYD88_KO_MACROPHAGE_UP	GSE22935_UNSTIM_VS_24H_MBOVIS_BCG_STIM_MYD88_KO_MACROPHAGE_UP	Details ...	63	-0.387099	-1.7135	0	0.04013	1	1784	tags=70%, list=37%, signal=109%
GSE3982_CTRL_VS_LPS_4H_MAC_DN	GSE3982_CTRL_VS_LPS_4H_MAC_DN	Details ...	63	-0.410343	-1.71274	0	0.0403332	1	1242	tags=57%, list=25%, signal=76%
MIR624_5P	MIR624_5P	Details ...	27	-0.497241	-1.71176	0	0.0405723	1	1925	tags=81%, list=39%, signal=134%
GSE16697_CD4_TCELL_VS_TFH_CD4_TCELL_UP	GSE16697_CD4_TCELL_VS_TFH_CD4_TCELL_UP	Details ...	50	-0.423813	-1.71022	0	0.041143	1	1240	tags=48%, list=25%, signal=64%
KAECH_NAIVE_VS_DAY15_EFF_CD8_TCELL_DN	KAECH_NAIVE_VS_DAY15_EFF_CD8_TCELL_DN	Details ...	72	-0.393775	-1.71011	0	0.0411663	1	890	tags=42%, list=18%, signal=50%
GSE45739_UNSTIM_VS_ACD3_ACD28_STIM_WT_CD4_TCELL_UP	GSE45739_UNSTIM_VS_ACD3_ACD28_STIM_WT_CD4_TCELL_UP	Details ...	56	-0.416988	-1.70988	0	0.041202	1	1365	tags=61%, list=28%, signal=83%
MODULE_317	MODULE_317	Details ...	110	-0.353144	-1.70968	0	0.0412959	1	1145	tags=41%, list=23%, signal=52%
GSE360_L_DONOVANI_VS_B_MALAYI_HIGH_DOSE_MAC_UP	GSE360_L_DONOVANI_VS_B_MALAYI_HIGH_DOSE_MAC_UP	Details ...	56	-0.423073	-1.70968	0	0.0412739	1	855	tags=41%, list=18%, signal=49%
WP_ARRHYTHMOGENIC_RIGHT_VENTRICULAR_CARDIOMYOPATHY	WP_ARRHYTHMOGENIC_RIGHT_VENTRICULAR_CARDIOMYOPATHY	Details ...	21	-0.511335	-1.7095	0	0.0412876	1	747	tags=48%, list=15%, signal=56%
GSE3982_NEUTROPHIL_VS_TH1_UP	GSE3982_NEUTROPHIL_VS_TH1_UP	Details ...	44	-0.435975	-1.70925	0	0.0413617	1	631	tags=32%, list=13%, signal=36%
CEBPDELTA_Q6	CEBPDELTA_Q6	Details ...	62	-0.403834	-1.70916	0	0.0413653	1	429	tags=26%, list=9%, signal=28%
CUI_DEVELOPING_HEART_TRABECULAR_ATRIAL_CARDIOMYOCYTE	CUI_DEVELOPING_HEART_TRABECULAR_ATRIAL_CARDIOMYOCYTE	Details ...	66	-0.41	-1.70888	0	0.0414523	1	948	tags=42%, list=19%, signal=52%
CHANDRAN_METASTASIS_DN	CHANDRAN_METASTASIS_DN	Details ...	100	-0.388888	-1.70851	0	0.0415394	1	659	tags=32%, list=13%, signal=36%
JOSEPH_RESPONSE_TO_SODIUM_BUTYRATE_DN	JOSEPH_RESPONSE_TO_SODIUM_BUTYRATE_DN	Details ...	18	-0.532983	-1.70835	0	0.0415558	1	401	tags=28%, list=8%, signal=30%
GOBP_CELLULAR_RESPONSE_TO_NUTRIENT	GOBP_CELLULAR_RESPONSE_TO_NUTRIENT	Details ...	17	-0.587694	-1.70796	0	0.0416936	1	805	tags=53%, list=16%, signal=63%
KRIEG_HYPOXIA_NOT_VIA_KDM3A	KRIEG_HYPOXIA_NOT_VIA_KDM3A	Details ...	248	-0.337457	-1.70777	0	0.0417133	1	1512	tags=48%, list=31%, signal=65%
GSE17580_UNINFECTED_VS_S_MANSONI_INF_TREG_DN	GSE17580_UNINFECTED_VS_S_MANSONI_INF_TREG_DN	Details ...	65	-0.381776	-1.70754	0	0.0417487	1	855	tags=34%, list=18%, signal=40%
GSE34217_MIR17_92_OVEREXPRESS_VS_WT_ACT_CD8_TCELL_UP	GSE34217_MIR17_92_OVEREXPRESS_VS_WT_ACT_CD8_TCELL_UP	Details ...	38	-0.467096	-1.70726	0	0.0418475	1	1394	tags=58%, list=29%, signal=80%
GOBP_MUSCLE_SYSTEM_PROCESS	GOBP_MUSCLE_SYSTEM_PROCESS	Details ...	118	-0.371016	-1.70682	0	0.041995	1	665	tags=28%, list=14%, signal=32%
ZNF512_TARGET_GENES	ZNF512_TARGET_GENES	Details ...	98	-0.351471	-1.7068	0	0.0419791	1	682	tags=23%, list=14%, signal=27%
BACH2_01	BACH2_01	Details ...	83	-0.382551	-1.70676	0	0.0419697	1	1292	tags=49%, list=26%, signal=66%
GSE24634_TREG_VS_TCONV_POST_DAY10_IL4_CONVERSION_DN	GSE24634_TREG_VS_TCONV_POST_DAY10_IL4_CONVERSION_DN	Details ...	59	-0.416738	-1.70616	0	0.042107	1	1238	tags=58%, list=25%, signal=76%
ZHANG_RESPONSE_TO_IKK_INHIBITOR_AND_TNF_DN	ZHANG_RESPONSE_TO_IKK_INHIBITOR_AND_TNF_DN	Details ...	31	-0.452949	-1.70589	0	0.0421803	1	544	tags=29%, list=11%, signal=32%
GSE7400_CTRL_VS_CSF3_IN_VIVO_TREATED_PBMC_DN	GSE7400_CTRL_VS_CSF3_IN_VIVO_TREATED_PBMC_DN	Details ...	47	-0.41791	-1.70553	0	0.0422984	1	1439	tags=51%, list=29%, signal=72%
GSE36888_STAT5_AB_KNOCKIN_VS_WT_TCELL_IL2_TREATED_2H_UP	GSE36888_STAT5_AB_KNOCKIN_VS_WT_TCELL_IL2_TREATED_2H_UP	Details ...	60	-0.417884	-1.70541	0	0.0423272	1	908	tags=38%, list=19%, signal=47%
AP1_C	AP1_C	Details ...	87	-0.386128	-1.70514	0	0.0423587	1	1017	tags=40%, list=21%, signal=50%
GOBP_HEART_GROWTH	GOBP_HEART_GROWTH	Details ...	23	-0.476759	-1.70479	0	0.0424442	1	648	tags=43%, list=13%, signal=50%
GOBP_POSITIVE_REGULATION_OF_PEPTIDYL_TYROSINE_PHOSPHORYLATION	GOBP_POSITIVE_REGULATION_OF_PEPTIDYL_TYROSINE_PHOSPHORYLATION	Details ...	50	-0.429798	-1.70447	0	0.0425138	1	624	tags=36%, list=13%, signal=41%
GSE24081_CONTROLLER_VS_PROGRESSOR_HIV_SPECIFIC_CD8_TCELL_DN	GSE24081_CONTROLLER_VS_PROGRESSOR_HIV_SPECIFIC_CD8_TCELL_DN	Details ...	50	-0.42537	-1.70444	0	0.0425169	1	1279	tags=50%, list=26%, signal=67%
HMGA1_TARGET_GENES	HMGA1_TARGET_GENES	Details ...	168	-0.339271	-1.70433	0	0.0425201	1	993	tags=30%, list=20%, signal=37%
GOBP_REGULATION_OF_HEMOPOIESIS	GOBP_REGULATION_OF_HEMOPOIESIS	Details ...	109	-0.370621	-1.70431	0	0.0425167	1	803	tags=29%, list=16%, signal=34%
GSE360_L_MAJOR_VS_B_MALAYI_LOW_DOSE_DC_UP	GSE360_L_MAJOR_VS_B_MALAYI_LOW_DOSE_DC_UP	Details ...	49	-0.427279	-1.70428	0	0.0425134	1	963	tags=41%, list=20%, signal=50%
GSE25087_TREG_VS_TCONV_FETUS_UP	GSE25087_TREG_VS_TCONV_FETUS_UP	Details ...	54	-0.394476	-1.70426	0	0.0424975	1	1171	tags=48%, list=24%, signal=63%
HP_ABNORMALITY_OF_THE_DENTITION	HP_ABNORMALITY_OF_THE_DENTITION	Details ...	215	-0.333394	-1.7041	0	0.0425384	1	416	tags=17%, list=9%, signal=17%
UBN1_TARGET_GENES	UBN1_TARGET_GENES	Details ...	444	-0.310606	-1.70394	0	0.0425603	1	1205	tags=31%, list=25%, signal=37%
GSE14000_UNSTIM_VS_16H_LPS_DC_DN	GSE14000_UNSTIM_VS_16H_LPS_DC_DN	Details ...	62	-0.422126	-1.70384	0	0.0425824	1	1592	tags=63%, list=33%, signal=92%
GSE11057_NAIVE_VS_CENT_MEMORY_CD4_TCELL_DN	GSE11057_NAIVE_VS_CENT_MEMORY_CD4_TCELL_DN	Details ...	69	-0.417467	-1.70339	0	0.0426865	1	1480	tags=61%, list=30%, signal=86%
GSE34156_UNTREATED_VS_24H_NOD2_LIGAND_TREATED_MONOCYTE_DN	GSE34156_UNTREATED_VS_24H_NOD2_LIGAND_TREATED_MONOCYTE_DN	Details ...	61	-0.41332	-1.70306	0	0.0427681	1	1471	tags=54%, list=30%, signal=76%
GSE17721_POLYIC_VS_CPG_16H_BMDC_UP	GSE17721_POLYIC_VS_CPG_16H_BMDC_UP	Details ...	44	-0.440348	-1.7024	0	0.0429439	1	1053	tags=45%, list=22%, signal=57%
GSE25085_FETAL_BM_VS_ADULT_BM_SP4_THYMIC_IMPLANT_DN	GSE25085_FETAL_BM_VS_ADULT_BM_SP4_THYMIC_IMPLANT_DN	Details ...	57	-0.415047	-1.70222	0	0.042997	1	1401	tags=53%, list=29%, signal=73%
GOBP_REGULATION_OF_PROTEIN_BINDING	GOBP_REGULATION_OF_PROTEIN_BINDING	Details ...	56	-0.433066	-1.70218	0	0.0429934	1	404	tags=21%, list=8%, signal=23%
HOWARD_PBMC_INACT_MONOV_INFLUENZA_A_INDONESIA_05_2005_H5N1_AGE_19_39YO_AS03_ADJUVANT_VS_BUFFER_1DY_UP	HOWARD_PBMC_INACT_MONOV_INFLUENZA_A_INDONESIA_05_2005_H5N1_AGE_19_39YO_AS03_ADJUVANT_VS_BUFFER_1DY_UP	Details ...	103	-0.380835	-1.70119	0	0.0433093	1	1358	tags=54%, list=28%, signal=74%
FAN_EMBRYONIC_CTX_BIG_GROUPS_MICROGLIA	FAN_EMBRYONIC_CTX_BIG_GROUPS_MICROGLIA	Details ...	105	-0.371688	-1.69998	0	0.0437557	1	1415	tags=57%, list=29%, signal=79%
GSE22196_HEALTHY_VS_OBESE_MOUSE_SKIN_GAMMADELTA_TCELL_UP	GSE22196_HEALTHY_VS_OBESE_MOUSE_SKIN_GAMMADELTA_TCELL_UP	Details ...	54	-0.426878	-1.6995	0	0.0439649	1	1292	tags=48%, list=26%, signal=65%
GOBP_CELL_ACTIVATION_INVOLVED_IN_IMMUNE_RESPONSE	GOBP_CELL_ACTIVATION_INVOLVED_IN_IMMUNE_RESPONSE	Details ...	175	-0.336635	-1.69948	0	0.0439546	1	1475	tags=45%, list=30%, signal=62%
GSE1791_CTRL_VS_NEUROMEDINU_IN_T_CELL_LINE_6H_UP	GSE1791_CTRL_VS_NEUROMEDINU_IN_T_CELL_LINE_6H_UP	Details ...	62	-0.420485	-1.69877	0	0.0442197	1	1339	tags=50%, list=27%, signal=68%
HP_ABNORMAL_STERNUM_MORPHOLOGY	HP_ABNORMAL_STERNUM_MORPHOLOGY	Details ...	117	-0.382971	-1.69828	0	0.0444175	1	868	tags=32%, list=18%, signal=38%
GOMF_TUMOR_NECROSIS_FACTOR_RECEPTOR_SUPERFAMILY_BINDING	GOMF_TUMOR_NECROSIS_FACTOR_RECEPTOR_SUPERFAMILY_BINDING	Details ...	16	-0.532262	-1.6982	0	0.0444134	1	660	tags=38%, list=14%, signal=43%
HP_BROAD_LONG_BONES	HP_BROAD_LONG_BONES	Details ...	37	-0.451633	-1.69815	0	0.0443966	1	659	tags=35%, list=13%, signal=40%
AMIT_EGF_RESPONSE_60_HELA	AMIT_EGF_RESPONSE_60_HELA	Details ...	18	-0.536742	-1.6973	0	0.0446676	1	830	tags=67%, list=17%, signal=80%
GSE9006_TYPE_1_DIABETES_AT_DX_VS_1MONTH_POST_DX_PBMC_DN	GSE9006_TYPE_1_DIABETES_AT_DX_VS_1MONTH_POST_DX_PBMC_DN	Details ...	55	-0.412262	-1.69728	0	0.0446507	1	1010	tags=35%, list=21%, signal=43%
GSE16522_MEMORY_VS_NAIVE_ANTI_CD3CD28_STIM_CD8_TCELL_UP	GSE16522_MEMORY_VS_NAIVE_ANTI_CD3CD28_STIM_CD8_TCELL_UP	Details ...	54	-0.428735	-1.69672	0	0.0447558	1	1490	tags=61%, list=31%, signal=87%
AR_Q2	AR_Q2	Details ...	27	-0.483345	-1.69623	0	0.0449205	1	657	tags=33%, list=13%, signal=38%
GSE21670_UNTREATED_VS_IL6_TREATED_STAT3_KO_CD4_TCELL_UP	GSE21670_UNTREATED_VS_IL6_TREATED_STAT3_KO_CD4_TCELL_UP	Details ...	59	-0.418446	-1.69606	0	0.0449904	1	901	tags=42%, list=18%, signal=51%
CUI_DEVELOPING_HEART_C4_ENDOTHELIAL_CELL	CUI_DEVELOPING_HEART_C4_ENDOTHELIAL_CELL	Details ...	50	-0.427527	-1.69554	0	0.045028	1	863	tags=46%, list=18%, signal=55%
NAKAYA_MONOCYTE_FLUARIX_FLUVIRIN_AGE_18_50YO_7DY_DN	NAKAYA_MONOCYTE_FLUARIX_FLUVIRIN_AGE_18_50YO_7DY_DN	Details ...	32	-0.443803	-1.6954	0	0.0450543	1	830	tags=44%, list=17%, signal=52%
GSE22886_CD8_TCELL_VS_BCELL_NAIVE_UP	GSE22886_CD8_TCELL_VS_BCELL_NAIVE_UP	Details ...	64	-0.406352	-1.69539	0	0.0450312	1	1199	tags=47%, list=25%, signal=61%
ALK_DN.V1_UP	ALK_DN.V1_UP	Details ...	32	-0.463196	-1.69503	0	0.045107	1	789	tags=47%, list=16%, signal=56%
DIAZ_CHRONIC_MEYLOGENOUS_LEUKEMIA_DN	DIAZ_CHRONIC_MEYLOGENOUS_LEUKEMIA_DN	Details ...	38	-0.431166	-1.69494	0	0.0451211	1	1159	tags=58%, list=24%, signal=75%
HP_RECURRENT_FEVER	HP_RECURRENT_FEVER	Details ...	16	-0.555451	-1.69484	0	0.0451722	1	222	tags=25%, list=5%, signal=26%
HP_CONSTITUTIONAL_SYMPTOM	HP_CONSTITUTIONAL_SYMPTOM	Details ...	249	-0.327102	-1.69431	0	0.045362	1	1056	tags=34%, list=22%, signal=41%
GSE42021_TCONV_PLN_VS_TREG_PRECURSORS_THYMUS_DN	GSE42021_TCONV_PLN_VS_TREG_PRECURSORS_THYMUS_DN	Details ...	64	-0.399672	-1.6943	0	0.0453573	1	1097	tags=42%, list=22%, signal=54%
GOBP_FEMALE_SEX_DIFFERENTIATION	GOBP_FEMALE_SEX_DIFFERENTIATION	Details ...	34	-0.441367	-1.69359	0	0.0457035	1	803	tags=41%, list=16%, signal=49%
GSE360_L_MAJOR_VS_B_MALAYI_LOW_DOSE_MAC_UP	GSE360_L_MAJOR_VS_B_MALAYI_LOW_DOSE_MAC_UP	Details ...	57	-0.402358	-1.69358	0	0.0456802	1	780	tags=35%, list=16%, signal=41%
RAF_UP.V1_UP	RAF_UP.V1_UP	Details ...	67	-0.418642	-1.69321	0	0.0458227	1	1321	tags=57%, list=27%, signal=77%
HP_PECTUS_EXCAVATUM	HP_PECTUS_EXCAVATUM	Details ...	77	-0.39507	-1.69304	0	0.0458434	1	914	tags=31%, list=19%, signal=38%
GOCC_TRANS_GOLGI_NETWORK	GOCC_TRANS_GOLGI_NETWORK	Details ...	68	-0.381265	-1.69299	0	0.0458385	1	1660	tags=60%, list=34%, signal=90%
GSE22196_HEALTHY_VS_OBESE_MOUSE_SKIN_GAMMADELTA_TCELL_DN	GSE22196_HEALTHY_VS_OBESE_MOUSE_SKIN_GAMMADELTA_TCELL_DN	Details ...	84	-0.396713	-1.69271	0	0.0458963	1	1503	tags=55%, list=31%, signal=78%
GOBP_ENDOTHELIAL_CELL_DEVELOPMENT	GOBP_ENDOTHELIAL_CELL_DEVELOPMENT	Details ...	17	-0.555966	-1.69246	0	0.0459295	1	1212	tags=65%, list=25%, signal=86%
GOMF_PROTEIN_CONTAINING_COMPLEX_BINDING	GOMF_PROTEIN_CONTAINING_COMPLEX_BINDING	Details ...	336	-0.311466	-1.69238	0	0.0459123	1	1127	tags=34%, list=23%, signal=41%
GOBP_CARDIOCYTE_DIFFERENTIATION	GOBP_CARDIOCYTE_DIFFERENTIATION	Details ...	42	-0.4352	-1.69237	0	0.045889	1	648	tags=36%, list=13%, signal=41%
GOBP_PROTEIN_PHOSPHORYLATION	GOBP_PROTEIN_PHOSPHORYLATION	Details ...	395	-0.311461	-1.69183	0	0.0460738	1	1034	tags=31%, list=21%, signal=37%
ONDER_CDH1_TARGETS_1_UP	ONDER_CDH1_TARGETS_1_UP	Details ...	43	-0.452999	-1.6918	0	0.0460627	1	962	tags=47%, list=20%, signal=57%
GSE5503_PLN_DC_VS_SPLEEN_DC_ACTIVATED_ALLOGENIC_TCELL_DN	GSE5503_PLN_DC_VS_SPLEEN_DC_ACTIVATED_ALLOGENIC_TCELL_DN	Details ...	54	-0.403088	-1.69168	0	0.0460649	1	2068	tags=76%, list=42%, signal=130%
GSE22313_HEALTHY_VS_SLE_MOUSE_CD4_TCELL_UP	GSE22313_HEALTHY_VS_SLE_MOUSE_CD4_TCELL_UP	Details ...	60	-0.404272	-1.69166	0	0.0460478	1	896	tags=38%, list=18%, signal=46%
HP_ABNORMAL_VASCULAR_MORPHOLOGY	HP_ABNORMAL_VASCULAR_MORPHOLOGY	Details ...	203	-0.334619	-1.69053	0	0.0462616	1	660	tags=23%, list=14%, signal=26%
HP_EXERTIONAL_DYSPNEA	HP_EXERTIONAL_DYSPNEA	Details ...	36	-0.43446	-1.68995	0	0.0464229	1	1460	tags=56%, list=30%, signal=79%
LI_AMPLIFIED_IN_LUNG_CANCER	LI_AMPLIFIED_IN_LUNG_CANCER	Details ...	69	-0.388507	-1.68983	0	0.0464421	1	695	tags=25%, list=14%, signal=28%
CEBPA_01	CEBPA_01	Details ...	50	-0.450563	-1.6898	0	0.0464368	1	936	tags=42%, list=19%, signal=51%
LTE2_UP.V1_DN	LTE2_UP.V1_DN	Details ...	63	-0.395243	-1.68979	0	0.0464196	1	1104	tags=54%, list=23%, signal=69%
GSE8835_CD4_VS_CD8_TCELL_DN	GSE8835_CD4_VS_CD8_TCELL_DN	Details ...	45	-0.406242	-1.68976	0	0.0464083	1	694	tags=31%, list=14%, signal=36%
GOCC_ENDOSOME_MEMBRANE	GOCC_ENDOSOME_MEMBRANE	Details ...	133	-0.346087	-1.6896	0	0.0464697	1	1780	tags=65%, list=36%, signal=100%
CEBPB_01	CEBPB_01	Details ...	65	-0.424741	-1.68914	0	0.0466658	1	1092	tags=45%, list=22%, signal=57%
GSE40666_UNTREATED_VS_IFNA_STIM_EFFECTOR_CD8_TCELL_90MIN_UP	GSE40666_UNTREATED_VS_IFNA_STIM_EFFECTOR_CD8_TCELL_90MIN_UP	Details ...	73	-0.40123	-1.68857	0	0.0468486	1	1235	tags=53%, list=25%, signal=70%
GOBP_MYELOID_LEUKOCYTE_ACTIVATION	GOBP_MYELOID_LEUKOCYTE_ACTIVATION	Details ...	165	-0.329279	-1.68856	0	0.0468312	1	1471	tags=43%, list=30%, signal=59%
HP_PREMATURE_LOSS_OF_TEETH	HP_PREMATURE_LOSS_OF_TEETH	Details ...	16	-0.529561	-1.68742	0	0.0472197	1	1029	tags=56%, list=21%, signal=71%
GOBP_REGULATION_OF_MAPK_CASCADE	GOBP_REGULATION_OF_MAPK_CASCADE	Details ...	182	-0.341439	-1.68721	0	0.0473111	1	787	tags=30%, list=16%, signal=35%
HP_ABNORMALITY_OF_REFRACTION	HP_ABNORMALITY_OF_REFRACTION	Details ...	118	-0.364698	-1.68632	0	0.047644	1	494	tags=19%, list=10%, signal=21%
GSE17721_CPG_VS_GARDIQUIMOD_6H_BMDC_UP	GSE17721_CPG_VS_GARDIQUIMOD_6H_BMDC_UP	Details ...	57	-0.424593	-1.68594	0	0.0478014	1	781	tags=35%, list=16%, signal=41%
HP_LIMITED_ELBOW_MOVEMENT	HP_LIMITED_ELBOW_MOVEMENT	Details ...	37	-0.442144	-1.68572	0	0.0478442	1	831	tags=41%, list=17%, signal=48%
GOBP_EMBRYONIC_SKELETAL_SYSTEM_DEVELOPMENT	GOBP_EMBRYONIC_SKELETAL_SYSTEM_DEVELOPMENT	Details ...	36	-0.449284	-1.68526	0	0.0480312	1	592	tags=36%, list=12%, signal=41%
GSE40274_CTRL_VS_FOXP3_AND_XBP1_TRANSDUCED_ACTIVATED_CD4_TCELL_DN	GSE40274_CTRL_VS_FOXP3_AND_XBP1_TRANSDUCED_ACTIVATED_CD4_TCELL_DN	Details ...	41	-0.445355	-1.68525	0	0.0480073	1	1457	tags=68%, list=30%, signal=97%
GSE37301_HEMATOPOIETIC_STEM_CELL_VS_COMMON_LYMPHOID_PROGENITOR_UP	GSE37301_HEMATOPOIETIC_STEM_CELL_VS_COMMON_LYMPHOID_PROGENITOR_UP	Details ...	58	-0.399336	-1.6851	0	0.0480676	1	614	tags=31%, list=13%, signal=35%
GOBP_NEGATIVE_REGULATION_OF_CELL_POPULATION_PROLIFERATION	GOBP_NEGATIVE_REGULATION_OF_CELL_POPULATION_PROLIFERATION	Details ...	180	-0.350857	-1.68503	0	0.0480616	1	846	tags=36%, list=17%, signal=41%
TFEB_TARGET_GENES	TFEB_TARGET_GENES	Details ...	318	-0.318698	-1.68501	0	0.0480437	1	1433	tags=42%, list=29%, signal=55%
GSE40666_UNTREATED_VS_IFNA_STIM_STAT4_KO_EFFECTOR_CD8_TCELL_90MIN_UP	GSE40666_UNTREATED_VS_IFNA_STIM_STAT4_KO_EFFECTOR_CD8_TCELL_90MIN_UP	Details ...	62	-0.394103	-1.68437	0	0.0483078	1	1443	tags=52%, list=30%, signal=72%
LAKE_ADULT_KIDNEY_C2_PODOCYTES	LAKE_ADULT_KIDNEY_C2_PODOCYTES	Details ...	64	-0.372105	-1.68365	0	0.0485473	1	1094	tags=45%, list=22%, signal=58%
HP_ABNORMAL_UVEA_MORPHOLOGY	HP_ABNORMAL_UVEA_MORPHOLOGY	Details ...	115	-0.368449	-1.6836	0	0.0485352	1	666	tags=24%, list=14%, signal=28%
HP_LYMPHEDEMA	HP_LYMPHEDEMA	Details ...	16	-0.557191	-1.68235	0	0.0490499	1	553	tags=31%, list=11%, signal=35%
TTANTCA_UNKNOWN	TTANTCA_UNKNOWN	Details ...	223	-0.327829	-1.68219	0	0.0491092	1	1022	tags=37%, list=21%, signal=44%
GSE15767_MED_VS_SCS_MAC_LN_UP	GSE15767_MED_VS_SCS_MAC_LN_UP	Details ...	49	-0.411561	-1.68194	0	0.0491864	1	1219	tags=55%, list=25%, signal=73%
GSE14415_NATURAL_TREG_VS_FOXP3_KO_NATURAL_TREG_DN	GSE14415_NATURAL_TREG_VS_FOXP3_KO_NATURAL_TREG_DN	Details ...	41	-0.466768	-1.6816	0	0.0493589	1	828	tags=41%, list=17%, signal=50%
KENNY_CTNNB1_TARGETS_DN	KENNY_CTNNB1_TARGETS_DN	Details ...	19	-0.554153	-1.68159	0	0.0493404	1	1629	tags=74%, list=33%, signal=110%
GSE1791_CTRL_VS_NEUROMEDINU_IN_T_CELL_LINE_6H_DN	GSE1791_CTRL_VS_NEUROMEDINU_IN_T_CELL_LINE_6H_DN	Details ...	52	-0.401305	-1.68158	0	0.049322	1	2037	tags=79%, list=42%, signal=134%
GOBP_OSSIFICATION	GOBP_OSSIFICATION	Details ...	127	-0.353561	-1.6815	0	0.0493149	1	1056	tags=43%, list=22%, signal=53%
GSE12392_IFNAR_KO_VS_IFNB_KO_CD8_NEG_SPLEEN_DC_UP	GSE12392_IFNAR_KO_VS_IFNB_KO_CD8_NEG_SPLEEN_DC_UP	Details ...	54	-0.40422	-1.68027	0	0.049795	1	1504	tags=61%, list=31%, signal=87%
GSE43955_10H_VS_30H_ACT_CD4_TCELL_UP	GSE43955_10H_VS_30H_ACT_CD4_TCELL_UP	Details ...	55	-0.439964	-1.67974	0	0.0499253	1	1127	tags=53%, list=23%, signal=68%
BLALOCK_ALZHEIMERS_DISEASE_INCIPIENT_UP	BLALOCK_ALZHEIMERS_DISEASE_INCIPIENT_UP	Details ...	101	-0.364942	-1.67874	0	0.0502936	1	1234	tags=40%, list=25%, signal=52%
GOBP_MESENCHYMAL_CELL_DIFFERENTIATION	GOBP_MESENCHYMAL_CELL_DIFFERENTIATION	Details ...	58	-0.414677	-1.67854	0	0.0503342	1	648	tags=34%, list=13%, signal=39%
BUSSLINGER_GASTRIC_ISTHMUS_CELLS	BUSSLINGER_GASTRIC_ISTHMUS_CELLS	Details ...	160	-0.34107	-1.67845	0	0.0503629	1	1151	tags=36%, list=24%, signal=45%
GOMF_SMAD_BINDING	GOMF_SMAD_BINDING	Details ...	26	-0.489699	-1.67842	0	0.0503499	1	496	tags=31%, list=10%, signal=34%
HP_INCREASED_CIRCULATING_ANTIBODY_LEVEL	HP_INCREASED_CIRCULATING_ANTIBODY_LEVEL	Details ...	26	-0.492875	-1.6782	0	0.0503905	1	784	tags=38%, list=16%, signal=46%
GSE360_L_MAJOR_VS_T_GONDII_MAC_UP	GSE360_L_MAJOR_VS_T_GONDII_MAC_UP	Details ...	50	-0.413316	-1.67744	0	0.0506716	1	1035	tags=46%, list=21%, signal=58%
MODULE_174	MODULE_174	Details ...	30	-0.507177	-1.67724	0	0.0507059	1	1067	tags=57%, list=22%, signal=72%
IVANOVA_HEMATOPOIESIS_STEM_CELL_LONG_TERM	IVANOVA_HEMATOPOIESIS_STEM_CELL_LONG_TERM	Details ...	58	-0.40083	-1.67691	0	0.0507982	1	1020	tags=48%, list=21%, signal=60%
GOBP_REGULATION_OF_BINDING	GOBP_REGULATION_OF_BINDING	Details ...	97	-0.35645	-1.67567	0	0.0513201	1	488	tags=19%, list=10%, signal=20%
HP_ABNORMALITY_OF_SKIN_PIGMENTATION	HP_ABNORMALITY_OF_SKIN_PIGMENTATION	Details ...	99	-0.365505	-1.67558	0	0.0513186	1	814	tags=25%, list=17%, signal=30%
HELLER_HDAC_TARGETS_SILENCED_BY_METHYLATION_UP	HELLER_HDAC_TARGETS_SILENCED_BY_METHYLATION_UP	Details ...	141	-0.334508	-1.67468	0	0.0517055	1	884	tags=32%, list=18%, signal=38%
GOBP_ACTIN_FILAMENT_BASED_PROCESS	GOBP_ACTIN_FILAMENT_BASED_PROCESS	Details ...	240	-0.327946	-1.67454	0	0.0517333	1	1232	tags=45%, list=25%, signal=57%
ENK_UV_RESPONSE_EPIDERMIS_DN	ENK_UV_RESPONSE_EPIDERMIS_DN	Details ...	157	-0.324661	-1.67427	0	0.0518791	1	817	tags=31%, list=17%, signal=36%
GOBP_REGULATION_OF_ENDOCYTOSIS	GOBP_REGULATION_OF_ENDOCYTOSIS	Details ...	54	-0.419927	-1.67402	0	0.0519304	1	1136	tags=46%, list=23%, signal=60%
PROVENZANI_METASTASIS_DN	PROVENZANI_METASTASIS_DN	Details ...	51	-0.434748	-1.67388	0	0.0519877	1	1466	tags=65%, list=30%, signal=91%
GSE30083_SP2_VS_SP3_THYMOCYTE_DN	GSE30083_SP2_VS_SP3_THYMOCYTE_DN	Details ...	51	-0.387711	-1.67371	0	0.0520212	1	827	tags=37%, list=17%, signal=44%
GSE30971_CTRL_VS_LPS_STIM_MACROPHAGE_WBP7_KO_2H_UP	GSE30971_CTRL_VS_LPS_STIM_MACROPHAGE_WBP7_KO_2H_UP	Details ...	51	-0.423306	-1.67363	0	0.0520194	1	861	tags=45%, list=18%, signal=54%
HP_GOWERS_SIGN	HP_GOWERS_SIGN	Details ...	16	-0.533267	-1.67354	0	0.052004	1	1691	tags=81%, list=35%, signal=124%
GSE40274_FOXP3_VS_FOXP3_AND_XBP1_TRANSDUCED_ACTIVATED_CD4_TCELL_UP	GSE40274_FOXP3_VS_FOXP3_AND_XBP1_TRANSDUCED_ACTIVATED_CD4_TCELL_UP	Details ...	41	-0.422517	-1.67323	0	0.0520707	1	737	tags=37%, list=15%, signal=43%
GSE21360_PRIMARY_VS_QUATERNARY_MEMORY_CD8_TCELL_UP	GSE21360_PRIMARY_VS_QUATERNARY_MEMORY_CD8_TCELL_UP	Details ...	65	-0.381038	-1.67317	0	0.0520513	1	1445	tags=58%, list=30%, signal=82%
PKCA_DN.V1_DN	PKCA_DN.V1_DN	Details ...	40	-0.434167	-1.67301	0	0.0520847	1	299	tags=28%, list=6%, signal=29%
ENK_UV_RESPONSE_KERATINOCYTE_UP	ENK_UV_RESPONSE_KERATINOCYTE_UP	Details ...	167	-0.329194	-1.67253	0	0.0522235	1	959	tags=31%, list=20%, signal=37%
[truncated: 9,319 more rows]
