# Supplementary material for: Differentiated glioma cell-derived fibromodulin activates integrin-dependent Notch signaling in endothelial cells to promote tumor angiogenesis and growth
Source: eLife journal article supplement (doi:10.7554/elife.78972), 2022-06-01
Supplement: fig2-figsupp1-data1 [file ELDA INPUT.xlsx]

## Sheet: ELDA INPUT_MGG8
1	10	0	A		ELDA input file
10	10	1	A
25	10	4	A
50	10	7	A
100	10	8	A
200	10	9	A
1	10	0	B
10	10	1	B
25	10	3	B
50	10	6	B
100	10	9	B
200	10	9	B
