# Supplementary material for: Differentiated glioma cell-derived fibromodulin activates integrin-dependent Notch signaling in endothelial cells to promote tumor angiogenesis and growth
Source: eLife journal article supplement (doi:10.7554/elife.78972), 2022-06-01
Supplement: fig2-figsupp1-data1 [file RT-QPCR ATA FOR PANEL E.xlsx]

## Sheet: Sheet1
	OLIG2	SOX2	POU3F2	SALL2
MGG8-DGC/shNT	1	1	1	1	0.01	0.01	0.01	0.01
MGG8-DGC/shFMOD	0.8	0.9	0.978	1.2	0.11	0.07	0.08	0.23
MGG8-GSC/shNT	2	1.81	1.6	1.5	0.2	0.14	0.19	0.13
MGG8-GSC/shFMOD	2.1	1.9	1.7	1.4456	0.21	0.18	0.15	0.2
