# Supplementary material for: Differentiated glioma cell-derived fibromodulin activates integrin-dependent Notch signaling in endothelial cells to promote tumor angiogenesis and growth
Source: eLife journal article supplement (doi:10.7554/elife.78972), 2022-06-01
Supplement: fig2-figsupp1-data1 [file SPHERE FORMATION VALUES FOR PANEL B.xlsx]

## Sheet: NUMBER OF SPHERES FOR shFMOD1
1	556.927	142.861	29	217	83.776	27.126	295.556	290	145.008	26.667
2	632.51	139.287	28	250	90.757	34.605	362.222	215.556	174.472	23.333
3	844.719	149.994	37	254	102.974	33.687	340.37	139.63	165.353	32.222
4	233.196	116.709	27	234	54.105	18.088	362.222	167.778	100.62	16.667
5	264.472	130.755	31	225	57.596	19.249	398.889	132.593	168.906	17.778
6	332.236	124.935	23	233	64.577	21.434	420	58.148	108.122	20
7	624.966	145.308	21	252	89.012	31.377	340	56.296	172.539	25.556
8	233.196	131.706	28	219	54.105	18.088	277.778	71.111	169.38	16.667
9	358.299	119.034	23	247	68.068	25.727	248.519	15.556	96.613	17.778
10	118.107	133.82	36	218	38.397	12.669	233.333	16.667	164.745	12.222
11	312.483	87.5	17	232	64.577	25.727	393.333	10.741	173.387	15.556
12	163.512	122.443	42	212	45.379	15.835	452.222	27.407	169.216	13.333
13	151.44	129.903	81	241	43.633	14.745	469.63	25.556	101.592	13.333
14	198.08	102.435	20	215	50.615	19.12	469.63	65.556	98.915	13.333
15	189.712	112.811	40	202	48.869	16.997	475.556	226.667	101.31	14.444
16	576.406	130.639	30	215	89.012	36.786	398.519	342.222	94.62	20
17	786.557	144.45	107	231	99.484	33.679	346.667	314.815	171.781	30
18	782.167	144.499	36	247	99.484	34.73	341.111	340	97.352	28.889
19	247.462	120.752	23	221	55.851	18.22	349.63	378.148	153.435	17.778
20	262.551	102.777	30	150	57.596	20.276	505.556	367.778	99.462	16.667
21	279.835	113.304	23	190	59.341	20.34	304.815	453.333	100.491	17.778
22	245.816	105.21	22	186	55.851	20.218	336.667	462.963	171.573	15.556
23	104.252	53.699	21	122	36.652	13.583	366.667	454.815	168.996	10
24	81.756	60.837	22	104	33.161	13.461	357.407	433.333	97.907	7.778
25	127.298	93.031	27	167	40.143	13.583	306.667	424.815	168.996	12.222
26	117.97	73.006	23	137	38.397	13.659	280.741	386.667	102.529	11.111
27	87.517	78.918	45	112	33.161	11.41	595.556	437.037	166.866	10
28	189.712	93.089	16	224	48.869	16.997	463.333	80	168.69	14.444
29	351.166	126.529	23	245	66.323	22.529	408.889	69.259	170.538	20
30	674.348	128.585	19	251	92.502	32.434	336.667	55.926	173.443	26.667
31	132.099	81.944	21	204	41.888	16.769	270	17.407	173.66	10
32	93.827	95.942	22	231	34.907	13.517	316.667	18.889	99.462	8.889
33	104.252	49.839	19	108	36.652	13.583	499.259	167.778	101.004	10
34	61.454	47.507	24	82	27.925	9.281	580.37	265.556	151.39	8.889
35	47.874	69.797	39	96	24.435	8.198	608.889	330.37	161.565	7.778
36	42.25	59.698	20	103	26.18	12.245	294.074	367.778	93.468	4.444
37	104.252	53.593	20	104	36.652	13.583	358.148	432.222	101.004	10
38	65.021	55.251	22	95	29.671	12.312	396.667	454.815	173.089	6.667
39	37.586	68.529	25	98	24.435	9.162	322.222	473.333	104.036	6.667
40	93.827	64.556	21	143	34.907	13.517	271.111	230	99.462	8.889
41	61.317	55.069	19	152	27.925	10.17	326.296	240	100.491	7.778
42	77.915	52.826	21	108	31.416	11.331	360	74.444	101.31	8.889
43	61.317	33.953	17	112	27.925	10.17	391.852	82.222	100.491	7.778
44	41.427	78.781	27	134	22.689	8.089	425.556	82.222	164.055	6.667
45	23.594	48.407	27	79	17.453	6.829	567.037	33.333	102.529	4.444
46	125.103	44.423	13	138	39.561	13.105	577.778	18.148	137.291	12.593
47	279.835	129.503	25	243	59.341	20.34	331.111	198.148	169.509	17.778
48	216.187	92.381	23	184	52.36	18.023	322.222	181.852	170.538	15.556
49	107.27	98.579	24	218	36.652	12.576	351.111	201.852	166.373	11.111
50	219.067	122.492	28	234	52.36	17.157	357.778	172.593	147.339	16.667

## Sheet: NUMBER OF SPHERES FOR shFMOD2
1	655.475	149.149	43	255	90.752	30.274	357.756	128.14	104.886	27.776
2	556.859	154.592	90	255	83.771	27.124	386.643	73.329	145.008	26.665
3	384.04	106.086	45	186	69.809	24.722	589.964	91.476	171.384	19.999
4	1056.8	104.139	36	176	115.185	37.186	598.482	325.165	135	36.664
5	896.597	129.62	40	178	108.204	41.31	427.751	326.276	174.341	27.776
6	325.886	136.469	55	204	64.573	23.519	423.307	351.83	172.763	17.777
7	247.295	72.136	32	139	55.847	19.18	418.863	417.752	169.992	16.666
8	216.16	115.156	54	171	52.357	18.022	393.309	365.163	170.538	15.555
9	151.422	109.78	45	139	43.631	14.744	410.715	338.868	101.592	13.333
10	231.796	116.656	46	182	54.102	19.119	410.715	306.648	98.915	15.555
11	216.16	118.223	41	183	52.357	18.022	396.642	301.833	170.538	15.555
12	281.584	129.761	45	195	59.338	19.407	376.643	281.834	138.094	18.888
13	491.846	150.663	88	227	78.535	25.938	365.533	291.093	99.866	24.443
14	164.726	142.46	71	206	45.376	14.897	347.756	289.612	145.125	14.444
15	175.013	119.136	56	167	47.121	16.927	331.091	304.055	169.919	13.333
16	254.015	90.298	39	155	58.174	23.069	373.31	230.356	174.472	14.073
17	177.482	118.621	51	156	47.121	15.908	388.865	242.207	167.905	14.444
18	125.91	136.387	52	219	40.14	14.613	224.431	175.545	171.254	11.11
19	101.496	125.67	43	246	36.65	14.613	126.659	36.664	98.746	8.888
20	114.252	133.678	47	211	38.395	14.674	128.881	61.478	169.824	9.999
21	81.746	94.106	47	132	33.159	13.46	157.768	86.291	172.093	7.777
22	127.282	81.112	45	134	40.14	13.582	180.359	92.217	101.004	12.221
23	33.878	93.15	51	153	20.943	7.995	196.655	88.513	166.608	5.555
24	902.769	172.633	67	255	106.459	34.83	152.213	262.947	171.439	33.331
25	731.048	139.575	39	249	95.987	32.525	119.993	265.539	172.147	28.887
26	388.292	170.107	80	224	69.809	23.685	139.621	301.093	99.904	21.11
27	598.006	163.981	54	227	87.261	31.329	182.211	273.687	173.211	24.443
28	491.846	170.107	59	244	78.535	25.938	196.655	241.096	99.866	24.443
29	351.123	162.004	56	240	66.318	22.527	220.357	235.541	99.462	19.999
30	341.247	164.89	80	241	66.318	24.622	212.209	286.279	173.089	17.777
31	127.282	135.692	51	201	40.14	13.582	229.245	303.315	101.004	12.221
32	175.013	148.562	61	195	47.121	16.927	240.726	305.537	100.081	13.333
33	164.726	141.333	62	190	45.376	14.897	258.873	281.834	145.125	14.444
34	204.364	140.562	76	212	50.611	16.992	281.464	272.576	159.59	15.555
35	109.177	111.348	53	155	38.395	15.713	304.426	266.65	98.13	8.888
36	87.506	101.843	49	138	33.159	11.409	301.463	244.429	103.134	9.999
37	85.038	121.706	61	160	33.159	12.422	314.425	247.762	100.305	8.888
38	35.112	113.078	52	172	22.688	10.109	306.648	238.133	171.573	4.444
39	471.272	150.811	88	227	76.79	24.899	356.274	299.611	157.249	24.443
40	279.801	113.159	41	173	59.338	20.339	371.088	282.575	169.509	17.777
41	198.055	119.501	46	183	50.611	19.119	398.494	291.093	98.915	13.333
42	366.759	112.428	40	187	68.064	23.624	396.642	311.462	170.981	19.999
43	89.289	110.175	43	139	34.904	14.562	409.604	335.535	97.306	7.777
44	428.616	128.569	39	204	73.299	23.777	423.307	344.423	142.595	23.332
45	969.839	128.065	41	178	111.694	41.31	428.862	325.165	174.341	29.998
46	535.462	122.411	40	166	82.025	26.974	324.054	416.641	98.686	25.554
47	549.589	130.748	42	177	83.771	30.183	247.762	412.197	173.66	23.332
48	185.985	110.24	41	159	48.866	18.022	143.324	376.273	170.538	13.333
49	191.472	100.342	44	143	48.866	16.024	166.656	367.755	146.31	15.555
50	231.796	100.321	41	198	54.102	19.119	198.877	318.499	171.085	15.555
51	150.599	98.799	44	180	43.631	15.471	210.357	323.684	168.959	12.592
52	210.125	148.463	61	236	52.357	20.122	286.649	253.318	96.34	13.333
53	104.24	99.568	45	177	36.65	13.582	308.129	249.985	101.004	9.999

## Sheet: NUMBER OF SPHERES FOR shNT1
1	262.551	90.053	23	190	57.596	20.276	340	74.444	170.538	16.667
2	294.65	88.139	31	211	61.087	21.318	347.778	60.741	172.011	17.778
3	117.97	68.478	27	181	38.397	13.659	444.074	21.111	102.529	11.111
4	125.926	46.68	19	113	40.143	14.614	587.778	71.111	98.746	11.111
5	87.517	44.517	20	71	33.161	11.41	590	118.148	166.866	10
6	231.824	69.391	21	134	54.105	19.12	553.333	157.407	171.085	15.556
7	127.298	38.8	15	104	40.143	13.583	596.667	158.148	168.996	12.222
8	139.918	51.337	19	112	41.888	13.779	515.556	121.481	143.746	13.333
9	135.528	43.689	14	122	41.888	15.713	502.222	146.667	171.87	11.111
10	150.069	61.785	15	180	43.633	15.77	502.593	165.556	99.462	12.222
11	151.44	84.665	20	183	43.633	14.745	491.111	222.963	168.408	13.333
12	294.65	116.725	19	233	61.087	21.318	389.63	181.111	97.989	17.778
13	139.918	70.918	16	196	41.888	13.779	396.667	150.37	143.746	13.333
14	79.15	60.955	17	190	31.416	10.489	443.333	158.148	137.862	10
15	535.528	147.565	18	255	82.03	26.976	306.667	196.296	171.314	25.556
16	127.298	101.956	22	202	40.143	13.583	369.259	201.111	101.004	12.222
17	384.088	127.587	23	239	69.813	24.723	320	140.37	171.384	20
18	449.108	141.177	26	255	75.049	24.782	288.889	142.963	170.538	23.333
19	606.447	99.291	16	226	87.266	28.289	243.704	89.63	136.061	27.778
20	204.39	71.977	17	189	50.615	16.993	261.481	63.704	110.41	15.556
21	68.313	59.41	13	144	29.671	11.264	222.222	67.407	170.538	7.778
22	189.712	57.913	17	120	48.869	16.997	182.222	40	168.69	14.444
23	264.472	91.602	24	190	57.596	19.249	143.333	91.481	168.906	17.778
24	598.08	106.119	17	228	87.266	31.331	133.333	141.481	173.211	24.444
25	743.484	172.335	28	255	97.738	35.748	90	207.037	174.053	26.667
26	384.088	120.536	21	252	69.813	24.723	82.222	177.037	171.384	20
27	164.746	76.186	14	158	45.379	14.898	23.333	127.407	145.125	14.444
28	96.982	52.662	12	123	34.907	12.494	70	113.704	168.024	10
29	294.65	68.195	13	157	61.087	21.318	12.963	82.222	97.989	17.778
30	393.416	61.705	12	141	78.54	26.976	-6.667	57.407	171.314	23.333
31	555.83	159.93	19	255	83.776	29.125	25.556	255.926	172.694	24.444
32	96.982	124.584	27	238	34.907	12.494	176.667	347.037	168.024	10
33	247.325	116.271	27	220	55.851	19.181	225.556	366.667	169.992	16.667
34	264.472	134.504	45	231	57.596	19.249	291.111	340.37	168.906	17.778
35	186.008	104.662	20	226	48.869	18.023	374.444	306.296	170.538	13.333
36	297.119	83.593	18	197	61.087	20.276	596.667	348.889	170.538	18.889
37	281.619	56.394	14	134	59.341	19.408	556.667	148.519	138.094	18.889
38	96.982	49.581	15	104	34.907	12.494	604.815	151.111	101.976	10
39	368.724	53.353	12	186	68.068	22.593	613.333	230.741	169.611	21.111
40	189.712	66.795	18	183	48.869	16.997	501.111	162.222	101.31	14.444
41	79.15	60.035	33	122	31.416	10.489	507.778	145.926	137.862	10
42	104.252	47.699	22	71	36.652	13.583	592.593	112.222	101.004	10
43	77.915	55.292	22	100	31.416	11.331	587.778	71.111	101.31	8.889
44	447.188	147.368	18	255	75.049	25.823	321.481	187.778	98.246	22.222
45	332.236	129.291	18	254	61.087	21.434	235.556	225.926	108.122	20
46	335.391	99.472	19	244	66.323	25.687	223.704	234.444	95.793	16.667
47	61.317	152.602	111	238	27.925	10.17	218.519	271.111	100.491	7.778
48	75.309	75.16	18	199	31.416	12.362	272.963	185.556	98.616	7.778
49	231.824	88.376	21	221	54.105	19.12	292.222	381.852	171.085	15.556
50	96.982	67.56	19	199	34.907	12.494	268.889	189.259	168.024	10
51	204.39	83.187	18	229	50.615	16.993	218.148	114.815	159.59	15.556
52	216.187	125.468	21	228	52.36	18.023	220.741	138.889	99.462	15.556
53	247.462	98.662	17	187	55.851	18.22	149.63	142.593	153.435	17.778
54	297.119	60.464	14	151	61.087	20.276	88.889	35.556	170.538	18.889
55	159.259	64.322	18	120	45.379	16.867	191.481	34.444	98.842	12.222

## Sheet: NUMBER OF SPSHERES FOR shNT2
NO.	AREA	FERETS	NO.	AREA	FERETS		NO.	AREA	FERETS
1	630.727	87.861	63	89.012	29.203		140	224.444	164.554	451.481
2	406.036	91.266	43	71.558	23.625		123	402.593	170.981	350
3	204.39	85.928	50	50.615	16.993		103	364.815	159.59	352.593
4	406.036	88.461	33	71.558	23.625		130	384.815	170.981	306.667
5	151.44	72.929	29	43.633	14.745		101	388.889	101.592	305.185
6	297.119	77.213	27	61.087	20.276		112	400	99.462	287.778
7	468.45	99.723	33	76.794	25.878		141	377.407	170.942	196.667
8	388.34	102.992	47	69.813	23.686		137	359.63	170.096	227.778
9	216.187	93.387	55	52.36	18.023		118	327.778	99.462	237.407
10	239.643	76.069	28	55.851	21.27		114	349.259	172.999	254.444
11	388.34	97.032	33	69.813	23.686		140	330.741	170.096	160
12	297.119	88.65	37	61.087	20.276		147	362.222	99.462	142.222
13	278.326	91.212	33	59.341	21.373		134	395.556	171.027	55.556
14	264.472	89.2	33	57.596	19.249		127	376.667	101.094	177.037
15	245.816	103.983	69	55.851	20.218		138	232.222	98.427	217.407
16	426.337	103.864	67	73.304	24.723		137	218.889	98.616	238.148
17	1329.08	97.281	32	129.154	41.604		181	172.222	145.886	232.222
18	489.438	105.234	37	78.54	26.976		177	161.852	171.314	268.889
19	569.547	106.019	59	85.521	31.289		161	121.111	96.116	280
20	418.656	96.98	75	73.304	26.831		126	115.185	173.66	276.667
21	544.307	99.41	75	83.776	31.331		126	115.926	173.211	276.667
22	523.457	95.335	33	82.03	30.228		160	113.333	97.038	310.37
23	332.236	96.258	36	64.577	21.434		158	139.259	108.122	316.667
24	132.099	80.817	40	41.888	16.769		113	128.889	96.34	338.519
25	272.702	82.653	32	59.341	22.419		103	112.222	97.595	345.185
26	351.303	89.549	36	66.323	21.577		133	149.259	140.572	340
27	402.469	96.988	39	71.558	25.823		156	117.778	98.246	370.37
28	163.512	62.88	29	45.379	15.835		103	115.185	169.216	380
29	247.462	77.788	29	55.851	18.22		131	101.481	153.435	404.074
30	294.65	84.261	38	61.087	21.318		124	128.519	172.011	421.111
31	139.918	87.994	72	41.888	13.779		137	131.481	143.746	458.889
33	485.048	90.131	43	78.54	28.024		134	138.148	172.405	474.444
34	444.307	84.642	31	76.794	30.112		158	163.704	175.061	478.889
35	449.108	79.388	30	75.049	24.782		148	143.333	99.462	550.741
36	857.613	65.932	41	104.72	37.959		103	123.704	174.401	576.667
37	485.048	69.624	53	78.54	28.024		91	138.889	97.595	618.148
38	428.669	75.176	29	73.304	23.779		129	83.333	142.595	536.667
39	216.187	54.392	25	52.36	18.023		87	16.667	99.462	570.741
40	164.746	64.997	32	45.379	14.898		132	7.407	145.125	417.778
41	104.252	65.682	34	36.652	13.583		124	10	101.004	397.037
42	69.684	67.276	36	29.671	10.244		114	18.889	102.529	412.222
43	214.678	79.312	30	52.36	19.066		123	34.815	172.185	304.444
44	77.915	68.12	33	31.416	11.331		114	44.444	168.69	338.889
45	219.067	83.957	36	52.36	17.157		127	98.148	147.339	403.333
46	93.827	77.079	48	34.907	13.517		102	116.667	170.538	385.556
47	118.107	83.433	36	38.397	12.669		123	164.444	164.745	353.333
48	262.551	90.137	37	57.596	20.276		118	255.556	99.462	290
49	150.069	95.569	72	43.633	15.77		143	243.704	170.538	296.667
50	436.488	95.063	40	75.049	27.935		158	231.111	96.089	321.852
51	69.684	78.402	60	29.671	10.244		90	220	102.529	350
52	245.816	83.537	35	55.851	20.218		107	366.296	171.573	351.111
53	58.162	65.818	31	27.925	11.209		86	273.704	172.405	226.667
54	366.804	91.582	32	68.068	23.625		137	151.481	170.981	314.444
55	140.192	72.342	30	42.47	15.77		135	70	99.462	398.519
56	54.87	74.652	49	26.18	9.11		124	13.704	116.565	396.296
57	77.915	82.975	48	31.416	11.331		116	54.444	168.69	295.556
58	150.069	87.469	40	43.633	15.77		123	35.926	170.538	305.556
59	151.44	77.972	33	43.633	14.745		121	224.074	168.408	287.778
60	125.926	78.078	39	40.143	14.614		114	157.778	98.746	362.222
61	201.92	97.604	80	50.615	17.966		125	154.815	171.703	338.889
62	310.562	93.017	32	62.832	22.419		148	130.741	172.405	363.333

## Sheet: Calculation_spformation
		50-200μm2		Avg.	St.dev	p-value	200-400μm2		Avg.	St.dev	p-vaue	400-800μm2		Avg.	St.Dev	p-value
	shFMOD	19	27	23	5.65685	1	51	39	45	8.48528	0.41558	39	29	34	7.07107	0.567666
	shNT	25	21	23	2.82843		41	34	37.5	4.94975		32	28	30	2.82843
shFMOD	109	101	105	5.65685	0.411119
shNT	103	96	99.5	4.94975
