# Supplementary material for: Differentiated glioma cell-derived fibromodulin activates integrin-dependent Notch signaling in endothelial cells to promote tumor angiogenesis and growth
Source: eLife journal article supplement (doi:10.7554/elife.78972), 2022-06-01
Supplement: fig2-figsupp2-data1 [file QRTPCR DATA FOR PANEL D.xlsx]

## Sheet: Sheet1
	FMOD1	FMOD2	ATP1	ATP2	Avg FMOD	AVG ATP	dct	ddct	log2FC	2^
AGR53-DGC/miRNT-DOX	31.2	31.76	27.6	27.23	31.48	27.415	4.065			1
AGR53-DGC/miRNT+DOX	30.13	30.76	26.34	27	30.445	26.67	3.775	-0.29	0.29	1.22264
AGR53-DGC/miRFMOD-DOX	30.98	30.57	27.4	27.1	30.775	27.25	3.525	-0.54	0.54	1.45397
AGR53-DGC/miRFMOD+DOX	33.3	33.1	26.56	27.2	33.2	26.88	6.32	2.545	-2.545	0.171348
