# Supplementary material for: Differentiated glioma cell-derived fibromodulin activates integrin-dependent Notch signaling in endothelial cells to promote tumor angiogenesis and growth
Source: eLife journal article supplement (doi:10.7554/elife.78972), 2022-06-01
Supplement: fig2-figsupp2-data1 [file RT-QPCR DATA FOR PANEL A.xlsx]

## Sheet: Sheet1
	FMOD1	FMOD2	ATP1	ATP2	Avg FMOD	AVG ATP	dct	ddct	log2FC	2^
AGR53-GSC	31.2	31.76	27.6	27.23	31.48	27.415	4.065			1
AGR53-DGC	25.98	26.57	28.1	28.7	26.275	28.4	-2.125	-1.94	1.94	3.83706
