# Supplementary material for: Differentiated glioma cell-derived fibromodulin activates integrin-dependent Notch signaling in endothelial cells to promote tumor angiogenesis and growth
Source: eLife journal article supplement (doi:10.7554/elife.78972), 2022-06-01
Supplement: fig2-figsupp4-data1 [file RT-QPCR FOR PANEL B.xlsx]

## Sheet: Sheet1
	Astrocytes	ENSC	RAR3G GSC	Uninduced 3-3 GSC	Induced 3-3 GSC
Melk	1	4.1	3.5	3.2	3.8	0.2	0.09	0.4	0.2	0.57	2.49644e-06	1.61246e-07	1.05802e-06	1.54062e-06
Nestin	1	3.4	3.9	3.5	3.9	0.36	0.12	0.55	0.41	0.67
Bmi1	1	3.9	4.2	3.7	4	0.17	0.27	0.89	0.55	0.34
Klf4	1	4.5	3.6	4	3.6	0.15	0.39	0.61	0.34	0.43
Twist2	1	4.1	3.5	4.1	3.6	0.06	0.1	0.24	0.82	0.61
Ptgs2	1	3.2	3.7	3.3	3	0.16	0.52	0.55	0.41	0.67
S100a6	1	3.9	4	3.4	3.2	0.17	0.87	0.89	0.55	0.34
