# Supplementary material for: Differentiated glioma cell-derived fibromodulin activates integrin-dependent Notch signaling in endothelial cells to promote tumor angiogenesis and growth
Source: eLife journal article supplement (doi:10.7554/elife.78972), 2022-06-01
Supplement: fig2-figsupp5-data1 [file RT-QPCR FOR PANEL B.xlsx]

## Sheet: Sheet1
	ASBG1	ALDH1	GFAP	S100B
DBT-LUC-GSC	0.2	1.05	0.18	0.02
DBT-LUC-DGC	1	1	1	1
