# Supplementary material for: Differentiated glioma cell-derived fibromodulin activates integrin-dependent Notch signaling in endothelial cells to promote tumor angiogenesis and growth
Source: eLife journal article supplement (doi:10.7554/elife.78972), 2022-06-01
Supplement: fig2-figsupp5-data1 [file RT-QPCR FOR PANEL C.xlsx]

## Sheet: Sheet1
DBT-LUC-DGC/MIRNT-DOX	1
DBT-LUC-DGC/MIRNT+DOX	1.23
DBT-LUC-DGC/MIRFMOD-DOX	1.18
DBT-LUC-DGC/MIRFMOD+DOX	0.4
