# Supplementary material for: Differentiated glioma cell-derived fibromodulin activates integrin-dependent Notch signaling in endothelial cells to promote tumor angiogenesis and growth
Source: eLife journal article supplement (doi:10.7554/elife.78972), 2022-06-01
Supplement: fig2-figsupp5-data1 [file RTQPCR FOR PANEL A.xlsx]

## Sheet: Sheet1
	MELK	NESTIN	BMI1	KLF	TWIST	PTGS2	S100A6
DBT-LUC-GSC	7.2	4.1	3.3	1.9	4.1	1.6	0.9
DBT-LUC DGC	1	1	1	1	1	1	1
