# Supplementary material for: Differentiated glioma cell-derived fibromodulin activates integrin-dependent Notch signaling in endothelial cells to promote tumor angiogenesis and growth
Source: eLife journal article supplement (doi:10.7554/elife.78972), 2022-06-01
Supplement: fig2-figsupp5-data1 [file RTQPCR.xlsx]

## Sheet: Sheet1
dbt-luc-DGC/mirNT-dox	1
dbt-luc-DGC/mirNT+dox	1.3
dbt-luc-DGC/mirFMOD-DOX	1.1
dbt-luc-DGC/mirFMOD+DOX	0.3
