# Supplementary material for: Differentiated glioma cell-derived fibromodulin activates integrin-dependent Notch signaling in endothelial cells to promote tumor angiogenesis and growth
Source: eLife journal article supplement (doi:10.7554/elife.78972), 2022-06-01
Supplement: fig2-figsupp7-data1 [file BLOTS.pdf › Figure 2-Figure Supplement 7-Source Data/BLOTS.pdf]

## Supplementary Figure 12

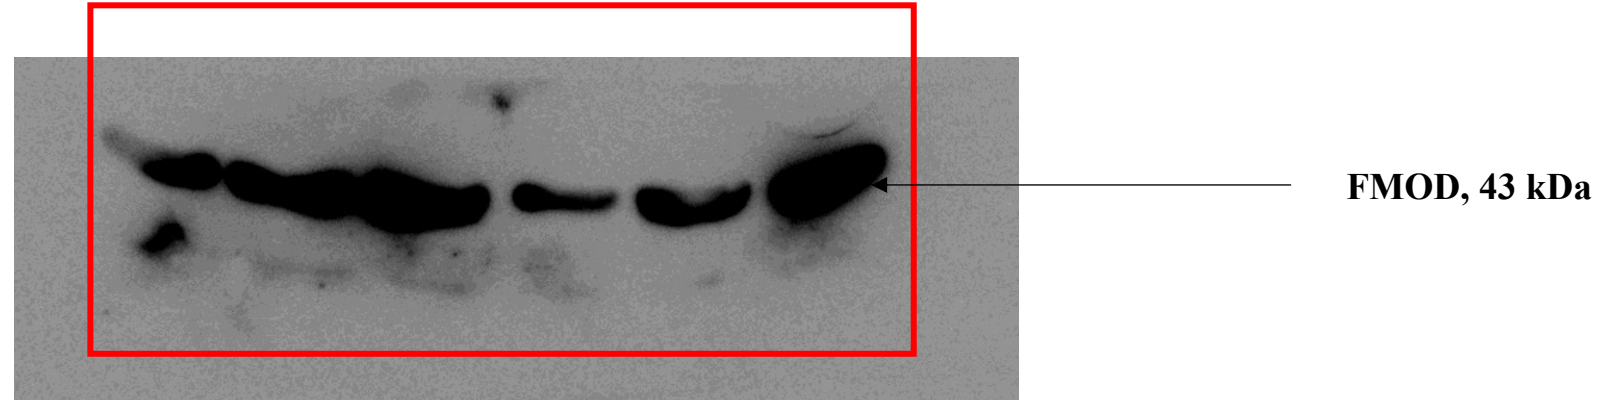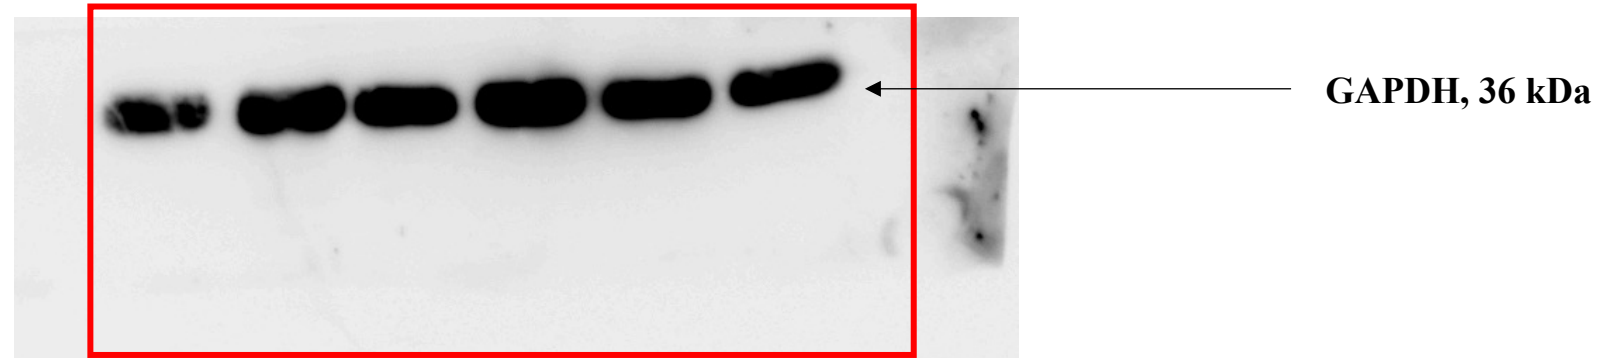

A separate gel was run with less amount of total protein for GAPDH western blot
