# Supplementary material for: Differentiated glioma cell-derived fibromodulin activates integrin-dependent Notch signaling in endothelial cells to promote tumor angiogenesis and growth
Source: eLife journal article supplement (doi:10.7554/elife.78972), 2022-06-01
Supplement: fig3-data2 [file NUMBER OF NETWORKS FOR EACH CONDITION OF PANEL B.xlsx]

## Sheet: NO.OF NETWORKS
Positive Control	99	109	104	7.07107
Negative control	4	2	3	1.41421
LN229/Vector Control	85	97	91	8.48528
LN229/FMOD	186	209	197.5	16.2635
