# Supplementary material for: Differentiated glioma cell-derived fibromodulin activates integrin-dependent Notch signaling in endothelial cells to promote tumor angiogenesis and growth
Source: eLife journal article supplement (doi:10.7554/elife.78972), 2022-06-01
Supplement: fig3-data4 [file NUMBER OF NETWORKS FOR PANEL D.xlsx]

## Sheet: NUMBER OF NETWORKS
	WELL1	WELL2	AVERAGE	ST DEV	P VALUE
Positive Control	223	214	218.5	6.36396
Negative Cntrol	5	9	7	2.82843	0.00398731
NBM Control	2	5	3.5	2.12132	0.00643954
GSC	196	179	187.5	12.0208	0.03581
DGC CM/ST1	89	95	92	4.24264
GSC CM+FAb/ST1	176	162	169	9.89949
DGC CM+FAb/ST1	42	39	40.5	2.12132
DGC CM+FAb+rhFMOD/ST1	132	143	137.5	7.77817
DGC shNT CM/ST1	113	121	117	5.65685
DGC shFMOD CM/ST1	23	28	25.5	3.53553
DGC shFMOD CM+ rhFMOD/ST1	98	82	90	11.3137
