# Supplementary material for: Differentiated glioma cell-derived fibromodulin activates integrin-dependent Notch signaling in endothelial cells to promote tumor angiogenesis and growth
Source: eLife journal article supplement (doi:10.7554/elife.78972), 2022-06-01
Supplement: fig3-data6 [file NUMBER OF NETWORKS FOR PANEL F.xlsx]

## Sheet: NUMBER OF NETWORKS
Negative Control	9	11
Positive Control	97	101
HBMEC+ MGG8-DGC/shNT CM	112	114
HBMEC+ MGG8-DGC/shFMOD CM	32	29
HBMEC+ MGG8-DGC/shFMOD CM +rhFMOD	97	96
