# Supplementary material for: Differentiated glioma cell-derived fibromodulin activates integrin-dependent Notch signaling in endothelial cells to promote tumor angiogenesis and growth
Source: eLife journal article supplement (doi:10.7554/elife.78972), 2022-06-01
Supplement: fig3-data7 [file RT-QPCR DATA FOR PANEL G.xlsx]

## Sheet: EXPRESSION DATA FMOD CD31
	FMOD		CD31		ATP		AVG FMOD	AVG CD31	AVG ATP	N CT FMOD	N CT CD31	FC FMOD	FC CD31	L2FC FMOD	L2FC CD31	2^ FMOD	2^CD31
ST1	34.1	33.5	22.4	25.8	24.5	24.54	33.8	24.1	24.52	9.28	-0.42					1	4
MGG8-DGC/shNT	29.5	29.33	21.73	20.91	23.1	21.23	29.415	21.32	22.165	7.25	-0.845	-2.03	-0.425	2.03	0.425	4.08405	1.34257
MGG8-DGC/shFMOD	32.5	32.92	23.23	23.74	24.65	24.65	32.71	23.485	24.65	8.06	-1.165	-1.22	-0.745	1.22	0.745	2.32947	1.67597
MGG8-DGC-TDEC/shNT	33.1	32.78	22.83	21.94	24.33	25.1	32.94	22.385	24.715	8.225	-2.33	-1.055	-1.91	1.055	1.91	2.07772	3.75809
MGG8-DGC-TDEC/shFMOD	34.43	33.275	23.34	23.1	25.21	24.96	33.8525	23.22	25.085	8.7675	-1.865	-0.5125	-1.445	0.5125	1.445	1.42652	2.72263
