# Supplementary material for: Differentiated glioma cell-derived fibromodulin activates integrin-dependent Notch signaling in endothelial cells to promote tumor angiogenesis and growth
Source: eLife journal article supplement (doi:10.7554/elife.78972), 2022-06-01
Supplement: fig3-data8 [file elife-78972-fig3-data8-v3.zip]

3H

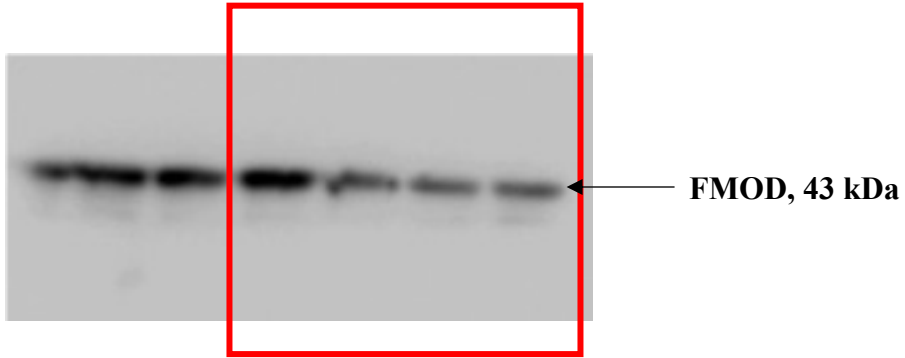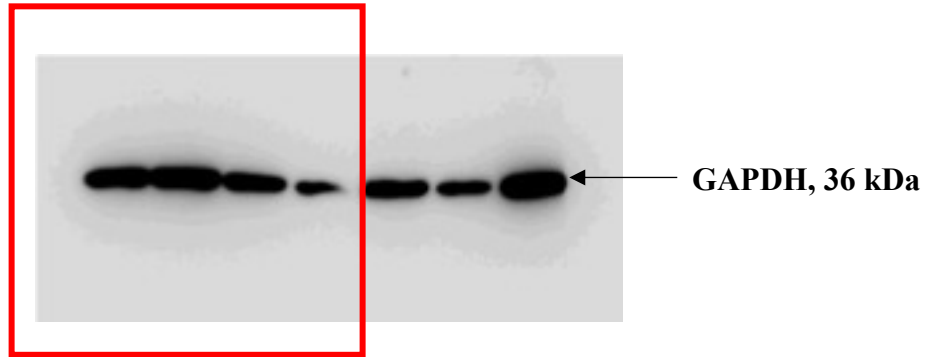

Figure 3

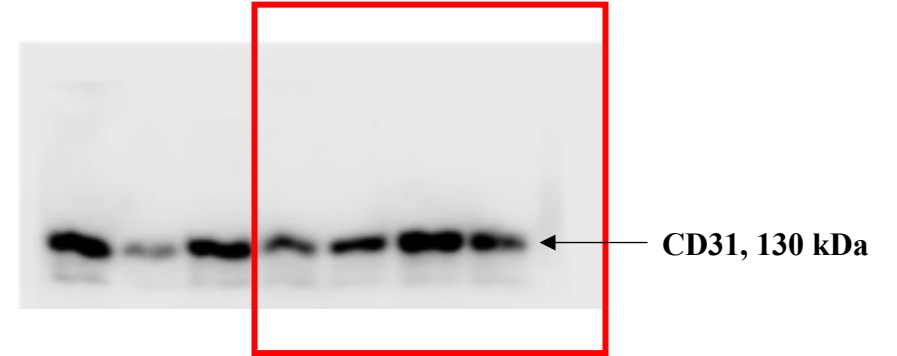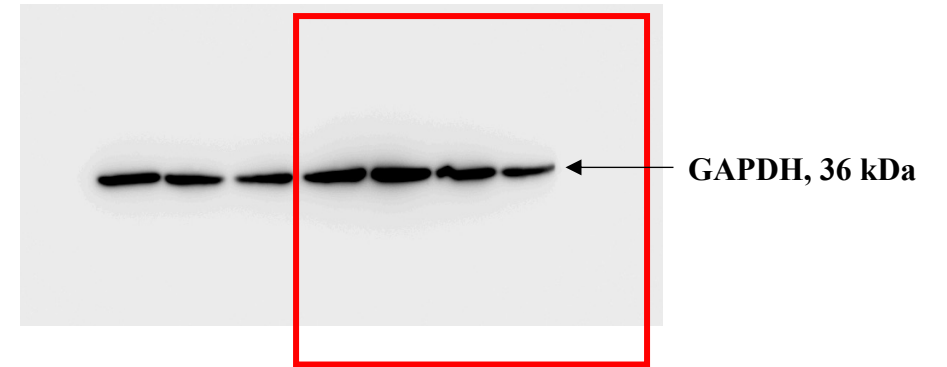

This blot got flipped while developing, the correct order has been put in the main text file, while the raw image has the original version.
