# Supplementary material for: Differentiated glioma cell-derived fibromodulin activates integrin-dependent Notch signaling in endothelial cells to promote tumor angiogenesis and growth
Source: eLife journal article supplement (doi:10.7554/elife.78972), 2022-06-01
Supplement: fig3-data10 [file NUMBER OF NETWORKS FOR PANEL J.xlsx]

## Sheet: NUMBER OF NETWORKS FOR PANEL J
ST1	NEGATIVE CONTROL	8	9	8.5
	POSITIVE CONTROL	101	99	100
MGG8-DGC-TDEC	NEGATIVE CONTROL	27	28	27.5
	POSITIVE CONTROL	99	100	99.5
MGG8-DGC-TDEC/SHNT	BSA	36	38	37
MGG8-DGC-TDEC/SHNT	RHFMOD	120	116	118
MGG8-DGC-TDEC/SHFMOD	BSA	11	18	14.5
MGG8-DGC-TDEC/SHFMOD	RHFMOD	73	90	81.5
