# Supplementary material for: Differentiated glioma cell-derived fibromodulin activates integrin-dependent Notch signaling in endothelial cells to promote tumor angiogenesis and growth
Source: eLife journal article supplement (doi:10.7554/elife.78972), 2022-06-01
Supplement: fig3-figsupp2-data1 [file MIGRATION, INVASION-A,B,C,D.xlsx]

## Sheet: Migration
A	RHFMOD	101	97	120	91	93	87	98	113	121
	BSA	41	49	54	62	39	42	38	37	51
B	MGG8-DGC/SHNT	201	197	176	200	189	198
	MGG8-DGC/SHFMOD	110	91	121	99	113	119

## Sheet: Invasion
C	RHFMOD	111	102	126	111	97	91	95	103
	BSA	39	27	38	41	44	51	39	37
D	MGG8-DGC/SHNT	182	189	199	201	196	186	193
	MGG8-DGC/SHFMOD	124	118	121	113	117	109	107
