# Supplementary material for: Differentiated glioma cell-derived fibromodulin activates integrin-dependent Notch signaling in endothelial cells to promote tumor angiogenesis and growth
Source: eLife journal article supplement (doi:10.7554/elife.78972), 2022-06-01
Supplement: fig3-figsupp2-data1 [file NUMBER OF NETWORKS FOR PANEL F.xlsx]

## Sheet: Sheet1
		WELL 1	WELL 2
	POS CONTROL	121	118
	NEGATIVE CONTROL	4	8
	MGG8-DGC/SINT	134	141
	MGG8-DGC/SIFMOD+BSA	55	63
	MGG8-DGC/SIFMOD+RHFMOD	131	139
