# Supplementary material for: Differentiated glioma cell-derived fibromodulin activates integrin-dependent Notch signaling in endothelial cells to promote tumor angiogenesis and growth
Source: eLife journal article supplement (doi:10.7554/elife.78972), 2022-06-01
Supplement: fig3-figsupp2-data1 [file PROLIFERATION FOR PANEL E.xlsx]

## Sheet: Sheet1
DAY1		DAY2		DAY3		DAY4
RHFMOD	BSA	RHFMOD	BSA	RHFMOD	BSA	RHFMOD	BSA
0.21	0.254	0.387	0.341	0.465	0.427	0.513	0.489
0.232	0.261	0.399	0.324	0.453	0.453	0.534	0.513
0.23	0.222	0.354	0.351	0.472	0.482	0.519	0.501
