# Supplementary material for: Differentiated glioma cell-derived fibromodulin activates integrin-dependent Notch signaling in endothelial cells to promote tumor angiogenesis and growth
Source: eLife journal article supplement (doi:10.7554/elife.78972), 2022-06-01
Supplement: fig4-data1 [file RPPA EXPRESSION RAW VALUES.xlsx]

## Sheet: EXP. VALUE FOR ALL PROTEINS
Sample description	Untreated	10min	30min	60min
HES1-R-V	-0.399807	-0.393858	0.393858	1.21622
NDRG1_pT346-R-V	-0.386649	-0.125393	0.125393	0.291828
FAK_pY397-R-V	-0.343048	-0.0694368	0.206251	0.0694368
VHL-EPPK1-M-C	-0.21084	0.275146	-0.462557	0.21084
Cyclin-D3-M-V	-0.180205	0.00946427	-0.00946427	0.0538474
Snail-M-Q	-0.166096	-0.104089	0.104089	0.859924
E-Cadherin-R-V	-0.133856	-0.0203281	0.0203281	0.144343
Cox-IV-R-V	-0.111664	0.172341	-0.0300693	0.0300693
DM-K9-Histone-H3-R-C	-0.108891	0.00617113	-0.00617113	0.00784844
DUSP4-R-V	-0.0999218	-0.0165867	0.0165867	0.0393832
IR-b-R-C	-0.0979204	0.0264272	-0.0264272	0.0485032
Histone-H3-R-V	-0.0942321	-0.00681998	0.0696339	0.00681998
Myt1-R-C	-0.0928754	-0.0211357	0.0285446	0.0211357
Connexin-43-R-C	-0.089542	0.089542	-0.0900095	0.15372
VASP-R-V	-0.0875005	0.0419974	0.0130908	-0.0130908
S6-M-V	-0.0836033	0.0246735	-0.0246735	0.0826157
Lck-R-V	-0.0814073	-0.012361	0.012361	0.0720197
S6_pS240_S244-R-V	-0.0796142	0.0796142	-0.0971983	0.110147
Vimentin-M-C	-0.0773998	0.190761	-0.227536	0.0773998
Rictor_pT1135-R-V	-0.0727685	-0.0432189	0.0432189	0.0610399
NF-kB-p65_pS536-R-C	-0.069629	0.021833	0.0134182	-0.0134182
Akt_pT308-R-V	-0.0645965	-0.17432	0.0645965	0.0785241
C-Raf-R-C	-0.0634947	0.00739282	-0.00739282	0.00791157
IGFRb-R-C	-0.0615361	0.0949185	-0.0174379	0.0174379
PMS2-R-V	-0.060706	0.0179327	-0.0179327	0.0276464
PD-L1-R-C	-0.0586554	0.0586554	-0.0664402	0.117856
SLC1A5-R-C	-0.0574806	0.0819582	-0.0202925	0.0202925
PARP-R-V	-0.0567151	0.0567151	-0.224104	0.0871184
Chk1_pS296-R-V	-0.05613	-0.0880702	0.0811426	0.05613
ERCC5-R-C	-0.0558394	0.0177466	-0.0177466	0.0314968
A-Raf-R-V	-0.0549947	-0.0057574	0.0057574	0.0329297
XPF-R-C	-0.0507971	0.0573969	-0.0303552	0.0303552
SDHA-R-V	-0.0503881	0.000573389	0.0126352	-0.000573389
Merlin-R-C	-0.0503219	0.167088	-0.137084	0.0503219
PI3K-p110-b-M-C	-0.049521	0.065114	-0.0257585	0.0257585
Smac-M-Q	-0.0493586	0.0597302	0.000806382	-0.000806382
PRAS40_pT246-R-V	-0.0493148	-0.0246674	0.0246674	0.0380809
eEF2-R-C	-0.0482559	0.0193225	0.0240575	-0.0193225
HLA-DR-DP-DQ-DX-M-V	-0.0480149	-0.0179313	0.0301913	0.0179313
Annexin-VII-M-V	-0.0477896	0.011452	-0.00901839	0.00901839
TTF1-R-V	-0.0475772	-0.0151872	0.0180819	0.0151872
MEK1-R-V	-0.0462383	0.0554647	-0.03524	0.03524
Atg7-R-V	-0.04357	-0.0151555	0.0413903	0.0151555
HER3-R-V	-0.0435546	0.0342428	-0.00930165	0.00930165
p70-S6K_pT389-R-V	-0.0423945	-0.117528	0.0423945	0.177846
IGF1R_pY1135_Y1136-R-V	-0.0397308	-0.0880763	0.060304	0.0397308
p21-R-V	-0.0391794	0.0222996	-0.0222996	0.0828128
Cox2-R-C	-0.0382089	-0.0219153	0.0219153	0.0899346
SHP-2_pY542-R-C	-0.0375461	-0.0902072	0.112091	0.0375461
PR-R-V	-0.0371674	-0.0135897	0.0231429	0.0135897
Tyro3-R-V	-0.0368634	0.0136877	0.0154844	-0.0136877
CD49b-M-V	-0.0361348	0.00133434	-0.00133434	0.030897
PAK4-R-V	-0.0353028	0.0201614	-0.0201614	0.0308003
FASN-R-V	-0.0347111	-0.0920136	0.0347111	0.0445278
PEA-15_pS116-R-V	-0.0338548	0.0338548	-0.0415989	0.0444912
U-Histone-H2B-R-C	-0.033779	-0.0287494	0.0512187	0.0287494
CD29-M-V	-0.0337003	0.0337003	-0.0972877	0.0768886
PAK1-R-V	-0.0326045	0.0305559	-0.0305559	0.0377604
IRF-1-R-C	-0.0323914	0.0280828	-0.0280828	0.029719
PLC-gamma2_pY759-R-C	-0.0320469	0.0142378	0.0193989	-0.0142378
Src_pY527-R-V	-0.031785	0.0146122	0.0455197	-0.0146122
N-Cadherin-R-V	-0.0315815	-0.00341112	0.0159041	0.00341112
AMPKa-R-C	-0.0291474	0.00187442	-0.00187442	0.00816682
WIPI1-R-C	-0.028776	-0.056513	0.0473027	0.028776
Shc_pY317-R-V	-0.0271548	0.0157849	0.0697861	-0.0157849
ACC1-R-C	-0.0269133	0.0422298	-0.0162321	0.0162321
XRCC1-R-C	-0.026785	-0.0171408	0.0403633	0.0171408
Bcl-xL-R-V	-0.0263982	0.0310551	0.0124752	-0.0124752
Notch3-R-C	-0.0250701	0.0186594	-0.0186594	0.0607275
Cyclin-D1-R-V	-0.0249586	-0.00528588	0.00528588	0.0610681
HSP27-M-C	-0.024604	-0.00878263	0.00878263	0.0383655
Jak2-R-V	-0.0236657	0.0289552	-0.0260784	0.0236657
Claudin-7-R-V	-0.0235508	0.0235508	0.0420577	-0.035714
S6_pS235_S236-R-V	-0.0221635	0.0221635	-0.0965365	0.311232
AMPKa_pT172-R-C	-0.0217198	0.0988638	-0.0336234	0.0217198
Fibronectin-R-V	-0.0205707	0.0710794	-0.0769721	0.0205707
EGFR_pY1173-R-V	-0.0202472	-0.0012913	0.0012913	0.0300624
N-Ras-M-V	-0.0199717	-0.014527	0.014527	0.0467204
Myosin-IIa_pS1943-R-V	-0.0195463	0.144986	0.0195463	-0.0916587
Rab11-R-C	-0.0195366	0.00693324	-0.00693324	0.00752448
Stat3_pY705-R-V	-0.0193908	-0.0234959	0.0376443	0.0193908
LDHA-R-C	-0.0188654	-0.0439655	0.0785912	0.0188654
SF2-M-V	-0.0183741	0.0311151	0.00235236	-0.00235236
Myosin-11-R-V	-0.0180298	0.0132739	0.00936154	-0.00936154
CD20-R-C	-0.0179821	0.00738654	-0.00738654	0.0412955
Bcl2-M-V	-0.0171727	0.00549523	-0.00549523	0.0377745
LC3A-B-R-C	-0.0171395	0.0916284	-0.204486	0.0171395
Rb_pS807_S811-R-V	-0.0169853	-0.0258923	0.0169853	0.0177157
ERCC1-M-V	-0.016807	0.0218931	-0.0394885	0.016807
CD31-M-V	-0.0160621	0.014998	-0.014998	0.0737515
COG3-R-V	-0.0155214	0.0115044	0.0397809	-0.0115044
PAICS-R-C	-0.0153329	-0.0319256	0.0216997	0.0153329
Bax-R-V	-0.0151317	0.000745687	0.0623804	-0.000745687
eIF4E-R-V	-0.0150943	0.0150943	0.0156408	-0.0316173
WIPI2-R-C	-0.0144074	-0.00415351	0.00415351	0.0420785
Glutaminase-R-C	-0.0143843	0.0143843	-0.0145425	0.0439081
PRAS40-M-C	-0.0140701	0.00885676	0.0316826	-0.00885676
CD134-R-V	-0.0132709	0.0147944	0.012457	-0.012457
ATR_pS428-R-C	-0.0130974	0.00208555	-0.00208555	0.0226182
Gys-R-V	-0.0130072	0.0510712	-0.0161971	0.0130072
AR-R-V	-0.0126096	0.00200953	0.0064916	-0.00200953
Chk2-M-V	-0.0121157	-0.00993473	0.0290237	0.00993473
P-Cadherin-R-C	-0.011162	0.011162	0.0293114	-0.0291813
b-Catenin_pT41_S45-R-V	-0.0111366	0.0069182	-0.0069182	0.035063
ACC_pS79-R-V	-0.0107172	0.0107172	-0.0586146	0.0110347
Jagged1-R-V	-0.00986754	0.00986754	-0.0285242	0.0512878
p38-MAPK-R-V	-0.00939328	0.00939328	0.0400959	-0.0321729
Stat5a-R-V	-0.00930614	0.0336253	-0.0128337	0.00930614
c-Myc-R-C	-0.00919011	0.00919011	-0.0176214	0.0916717
TFRC-R-V	-0.00909393	-0.0243521	0.00909393	0.108278
PCNA-M-C	-0.00900267	0.0161568	-0.00402491	0.00402491
Notch1-R-V	-0.00878846	0.00878846	-0.113865	0.0335368
Rad51-R-V	-0.00874948	0.0016352	-0.0016352	0.0274553
Oct-4-R-C	-0.00862145	0.0520206	-0.0403035	0.00862145
Cdc2_pY15-R-C	-0.00855576	-0.0303306	0.100489	0.00855576
Bak-R-C	-0.00828661	-0.0156533	0.00828661	0.0362248
Rad50-M-V	-0.00815536	0.00815536	0.0170539	-0.0211976
E2F1-M-V	-0.00812987	0.0158735	0.00812987	-0.0290612
53BP1-R-V	-0.00773756	0.0656214	0.00773756	-0.0206967
NDUFB4-M-V	-0.00743888	-0.00538082	0.0384845	0.00538082
PI3K-p85-R-V	-0.00741502	-0.000114639	0.0254496	0.000114639
INPP4b-R-V	-0.00698303	-0.0338555	0.00698303	0.0453192
B7-H4-R-C	-0.00679913	0.0241632	0.00212258	-0.00212258
eIF4G-R-C	-0.00670461	0.00670461	-0.111132	0.0932419
BAP1-M-V	-0.00624533	0.00624533	-0.0118805	0.0246018
PKC-delta_pS664-R-V	-0.00623346	0.0327283	-0.00999269	0.00623346
Atg3-R-V	-0.00578667	0.00578667	0.0402644	-0.024353
BRD4-R-V	-0.00554425	0.0163955	-0.355207	0.00554425
D-a-Tubulin-R-V	-0.00546987	0.000815317	0.0476088	-0.000815317
b-Actin-R-C	-0.00542375	0.040522	-0.0863764	0.00542375
PDK1_pS241-R-V	-0.00534719	0.00534719	0.053097	-0.0372835
PDK1-R-V	-0.00477979	-0.0264385	0.0455678	0.00477979
ATM_pS1981-R-V	-0.00450633	-0.0262304	0.00748363	0.00450633
Caveolin-1-R-V	-0.00446978	0.0485974	0.00446978	-0.0634137
Granzyme-B-R-V	-0.00437956	-0.0552289	0.0222682	0.00437956
PREX1-R-V	-0.00434747	0.00434747	0.0314426	-0.0354961
Gab2-R-V	-0.0042173	0.0042173	-0.10242	0.0157438
Cyclin-E1-M-V	-0.00410918	0.0153396	-0.0176754	0.00410918
Wee1-R-C	-0.00389055	-0.0335323	0.00389055	0.0987446
GCN5L2-R-V	-0.00354456	0.00354456	-0.00380536	0.0569574
EGFR-R-V	-0.00335529	0.00335529	-0.0153621	0.059409
MSH6-R-C	-0.00327176	0.0609844	-0.0436061	0.00327176
Src-M-V	-0.00319117	-0.00346788	0.00319117	0.0341165
XPA-M-V	-0.00308668	0.035856	-0.0639014	0.00308668
Bim-R-V	-0.00263867	0.00263867	-0.0496943	0.0171568
XBP-1-G-C	-0.00262341	-0.0113905	0.00262341	0.038387
Smad3-R-V	-0.00241398	0.0246967	-0.0530133	0.00241398
TUFM-R-V	-0.00233675	0.0261871	0.000922609	-0.000922609
JNK_pT183_Y185-R-V	-0.00205771	0.00205771	0.0697857	-0.00572178
PI3K-p110-a-R-C	-0.00169844	-0.0171882	0.0353518	0.00169844
UBAC1-R-V	-0.00159864	0.0179729	0.00159864	-0.0186422
FAK-R-C	-0.00136927	0.0717956	-0.000538295	0.000538295
MERIT40_pS29-R-V	-0.0011012	-0.0246884	0.0011012	0.0148389
Sox2-R-V	-0.00106579	-0.0485652	0.0159642	0.00106579
Tuberin-R-V	-0.000800685	0.000800685	-0.0118783	0.0212217
Bad_pS112-R-V	-0.00058466	-0.0322375	0.00058466	0.0710945
PDHK1-R-C	-8.41492e-05	-0.0366649	8.41492e-05	0.0316205
B-Raf_pS445-R-V	0.000168434	-0.000168434	0.0381845	-0.0167549
Rb-M-Q	0.00102106	0.0416007	-0.0111394	-0.00102106
GSK-3a-b-M-V	0.00116698	0.0362824	-0.01924	-0.00116698
SCD-M-V	0.0017141	-0.0017141	0.0225178	-0.0102769
p27-Kip-1-R-V	0.00186385	0.0324732	-0.00186385	-0.0223639
mTOR_pS2448-R-C	0.00209246	-0.00720715	-0.00209246	0.121614
TIGAR-R-V	0.00221765	0.00733004	-0.00221765	-0.0893237
Porin-M-V	0.00229954	0.0381005	-0.0859095	-0.00229954
MIG6-M-V	0.00271386	-0.00271386	-0.0250187	0.0118122
c-Abl-R-V	0.00290427	0.0242958	-0.00290427	-0.0230157
14-3-3-zeta-R-V	0.00301601	-0.00301601	0.0277533	-0.0525216
Caspase-8-M-Q	0.00310581	0.096659	-0.0181912	-0.00310581
DM-Histone-H3-R-V	0.00323431	-0.0287356	0.00366843	-0.00323431
IRS1-R-V	0.0037018	-0.0037018	-0.0474769	0.0196459
PDGFR-b-R-V	0.00412639	-0.00412639	-0.0682206	0.0138004
CD45-M-C	0.00438846	-0.00911159	0.00210534	-0.00210534
PKCa-R-V	0.00443618	-0.00443618	0.0595695	-0.0832607
Src_pY416-R-V	0.0047376	0.0192495	-0.0635755	-0.0047376
ER-R-V	0.0048266	0.0142882	-0.0100633	-0.0048266
4E-BP1_pS65-R-V	0.00500736	-0.00500736	-0.0120126	0.0330087
HER2_pY1248-R-C	0.00509637	-0.0363383	0.0054279	-0.00509637
Tuberin_pT1462-R-V	0.00525058	-0.0132571	0.0166295	-0.00525058
Elk1_pS383-R-C	0.00540173	-0.0205956	-0.00367156	0.00367156
NAPSIN-A-R-C	0.00554662	0.00969817	-0.0132332	-0.00554662
BiP-GRP78-M-C	0.0056436	-0.00948629	0.00893541	-0.0056436
Wee1_pS642-R-C	0.00575089	-0.00575089	-0.00687109	0.0383507
PTEN-R-V	0.00633578	-0.00633578	0.0714979	-0.0625987
Mnk1-R-V	0.00655225	0.00416016	-0.00416016	-0.0753245
b-Catenin-R-V	0.00717144	-0.0064191	-0.0293061	0.0064191
p38_pT180_Y182-R-V	0.00723123	-0.117237	-0.00723123	0.382499
ER-a_pS118-R-V	0.00734117	-0.00734117	0.0355037	-0.0105688
HSP70-R-C	0.00738272	0.0192652	-0.025847	-0.00738272
ATM-R-V	0.0082289	0.0563466	-0.0258717	-0.0082289
Glutamate-D1-2-R-C	0.00826338	-0.0157871	0.00607251	-0.00607251
FoxO3a-R-C	0.00853273	-0.0159747	-0.00853273	0.014514
Chk1-M-C	0.00878976	-0.00878976	0.0226001	-0.0313873
RBM15-R-V	0.00883365	-0.00883365	-0.0338619	0.0641911
LRP6_pS1490-R-V	0.00980049	-0.00980049	0.0316958	-0.0127221
PD-1-R-V	0.0101823	0.00822174	-0.0640203	-0.00822174
Aurora-B-R-V	0.0104568	-0.0136481	0.0514299	-0.0104568
TFAM-R-V	0.0105162	0.0563022	-0.0314952	-0.0105162
ZAP-70-R-C	0.0109952	0.018146	-0.0109952	-0.0283535
JNK2-R-C	0.0109963	-0.0409762	0.0637419	-0.0109963
MMP2-R-V	0.0110194	-0.00627342	-0.0132806	0.00627342
mTOR-R-V	0.0112074	0.0409549	-0.0570256	-0.0112074
C-Raf_pS338-R-V	0.0112439	-0.0112439	0.0238905	-0.031876
p70-S6K1-R-V	0.0114729	-0.0114729	0.0857889	-0.017455
p44-42-MAPK-R-V	0.0123338	-0.0123338	0.0646304	-0.0392672
Smad1-R-V	0.0124761	0.0365091	-0.0272549	-0.0124761
14-3-3-beta-R-V	0.0125093	-0.00894818	0.00894818	-0.0167478
Rheb-M-C	0.0125583	0.0194934	-0.038462	-0.0125583
p27_pT198-R-V	0.0127891	-0.00936701	-0.0243714	0.00936701
cdc25C-R-V	0.0136192	0.00073915	-0.00371895	-0.00073915
CD4-R-V	0.0137732	0.00184319	-0.00184319	-0.0226571
TWIST-M-C	0.0138079	-0.0138079	0.0295785	-0.0153028
Ets-1-R-V	0.0140636	0.0136427	-0.0136427	-0.0186275
B-Raf-R-C	0.0143879	-0.0599901	-0.0143879	0.0642463
Bid-R-C	0.0144303	-0.0144303	0.03821	-0.061094
Chk2_pT68-R-C	0.014794	0.00134963	-0.00134963	-0.0109468
YAP-R-C	0.0148444	-0.00883979	-0.012688	0.00883979
AMPK-a2_pS345-R-V	0.0151638	-0.0208631	0.0210334	-0.0151638
MIF-R-C	0.0161962	-0.0287922	0.0386133	-0.0161962
Beclin-G-C	0.0165833	-0.00481439	0.00481439	-0.0332033
GCLM-R-C	0.0168911	0.00112877	-0.00112877	-0.0398102
RSK-R-C	0.0169133	-0.0334772	0.0617062	-0.0169133
PKA-a-R-V	0.0171018	0.0651936	-0.0171018	-0.0261175
Akt_pS473-R-V	0.0177347	-0.173336	0.0830778	-0.0177347
Syk-M-V	0.0178613	-0.0178613	0.0584652	-0.0256945
FoxO3a_pS318_S321-R-C	0.0188901	-0.0149939	-0.0135191	0.0135191
Mcl-1-R-V	0.0191987	-0.0191987	-0.0251715	0.0597258
c-IAP2-R-C	0.0193914	-0.0165866	0.00373906	-0.00373906
ENY2-M-C	0.0211722	0.0858382	-0.0211722	-0.0350135
Tau-M-C	0.0226609	-0.0182979	-0.0365923	0.0182979
MSI2-R-C	0.0227702	0.00479934	-0.00479934	-0.0104883
Caspase-3-R-C	0.0237188	0.00486059	-0.00486059	-0.0244688
Rab25-R-V	0.0237299	-0.0224648	0.0162719	-0.0162719
PAI-1-M-V	0.0241874	-0.0241874	-0.0384391	0.141914
Paxillin-R-C	0.0245697	-0.0189402	-0.0208332	0.0189402
H2AX_pS140-M-C	0.0257735	-0.0584891	0.000407713	-0.000407713
PEA-15-R-V	0.025792	0.347772	-0.025792	-0.154324
Raptor-R-V	0.0261881	0.00319175	-0.00319175	-0.0158798
UGT1A-M-V	0.0263336	-0.0190247	0.0104885	-0.0104885
c-Kit-R-V	0.0264409	-0.00143767	-0.00116888	0.00116888
Cyclophilin-F-M-V	0.0277415	0.0847648	-0.0277415	-0.0553971
MCT4-R-V	0.0278004	0.0964541	-0.0278004	-0.0400163
Caspase-7-cleaved-R-C	0.0278284	-0.0248346	0.0115394	-0.0115394
eIF4E_pS209-R-V	0.0282533	0.00173645	-0.00173645	-0.0071835
c-Jun_pS73-R-V	0.028307	-0.028307	-0.168933	0.0446338
SOD2-R-V	0.0284966	-0.0213328	0.0213328	-0.0866806
Smad4-M-V	0.0287681	-0.00806528	0.00662813	-0.00662813
TRIM25-R-C	0.0314561	0.0410429	-0.0365296	-0.0314561
4E-BP1-R-V	0.0315937	0.0312513	-0.0312513	-0.149882
Heregulin-R-V	0.0326042	0.00357297	-0.00357297	-0.0284488
Creb-R-C	0.032727	0.00468095	-0.00468095	-0.0056956
Stat3-R-C	0.0339238	0.0539409	-0.0357048	-0.0339238
Slfn11-G-C	0.0354632	0.0338593	-0.0338593	-0.080486
GATA3-M-V	0.0361713	0.0167555	-0.034356	-0.0167555
GAPDH-M-C	0.0365566	-0.0365566	0.0419827	-0.197231
MDM2_pS166-R-V	0.0367927	-0.0367927	-0.0398555	0.0389873
DJ1-R-V	0.0374868	-0.0311408	0.0311408	-0.101186
HER2-M-V	0.0377568	-0.00440025	0.00428718	-0.00428718
PLK1-R-C	0.0380837	0.0226169	-0.0968092	-0.0226169
RPA32-T-C	0.0398738	-0.0223775	0.0223775	-0.039814
GSK-3a-b_pS21_S9-R-V	0.0398748	-0.146266	0.141301	-0.0398748
Pdcd4-R-C	0.0406423	-0.0406423	-0.0933934	0.132138
Rictor-R-C	0.0411626	-0.00327942	-0.129799	0.00327942
Akt-R-V	0.0417771	0.00309379	-0.00309379	-0.102766
Hexokinase-II-R-V	0.0421796	-0.00191451	0.00191451	-0.00925505
p16INK4a-R-V	0.0427927	0.00167085	-0.00167085	-0.0160878
G6PD-R-V	0.0431397	-0.0503504	-0.0080623	0.0080623
IGFBP2-R-V	0.0440188	-0.0324248	0.0324248	-0.0392566
YB1_pS102-R-V	0.045332	-0.00940253	-0.0109025	0.00940253
ADAR1-M-V	0.0453874	0.0209398	-0.0209398	-0.0385072
ULK1_pS757-R-C	0.0462038	-0.0817373	-0.0462038	0.108028
CDK1-R-C	0.0467115	0.0328069	-0.0328069	-0.112787
FoxM1-R-V	0.0469596	-0.0187415	-0.0863414	0.0187415
Stathmin-1-R-V	0.0471735	0.00739829	-0.00739829	-0.024531
MEK1_pS217_S221-R-V	0.0478881	0.0231396	-0.0231396	-0.036702
Gys_pS641-R-V	0.0492618	-0.055464	-0.0406669	0.0406669
PKM2-R-C	0.0501918	-0.0318667	0.0318667	-0.0775308
eEF2K-R-V	0.0504712	0.0547796	-0.0618676	-0.0504712
Collagen-VI-R-V	0.0515708	-0.0614649	0.0627257	-0.0515708
c-Met_pY1234_Y1235-R-V	0.0516612	0.00438462	-0.00438462	-0.0191332
ARID1A-R-C	0.0560602	-0.00203227	-0.0892651	0.00203227
RPA32_pS4_S8-R-C	0.056762	0.014321	-0.0790394	-0.014321
Transglutaminase-M-V	0.0627418	0.692399	-0.0627418	-0.231333
TSC1-R-C	0.065287	0.0331608	-0.180696	-0.0331608
HER3_pY1289-R-C	0.0653507	0.0209827	-0.0220266	-0.0209827
EMA-M-C	0.0697399	0.199276	-0.0697399	-0.0777354
YAP_pS127-R-V	0.070418	-0.0308857	0.0308857	-0.149767
RIP-R-C	0.0724799	-0.051198	-0.0299548	0.0299548
HSP27_pS82-R-V	0.0744758	0.0246765	-0.143132	-0.0246765
Axl-R-V	0.0754248	0.140344	-0.0900132	-0.0754248
Annexin-I-M-V	0.0992376	0.00565992	-0.00565992	-0.0353057
TAZ-R-V	0.103038	0.0617639	-0.106642	-0.0617639
p53-R-C	0.104616	0.0713298	-0.0713298	-0.0812744
MAPK_pT202_Y204-R-V	0.125487	-0.00865317	-0.000129787	0.000129787
SOD1-M-V	0.14447	0.0183358	-0.0183358	-0.041511
Cyclin-B1-R-V	0.150891	0.0154878	-0.143268	-0.0154878
p90RSK_pT573-R-C	0.16383	-0.0963671	-0.0512452	0.0512452
PKC-b-II_pS660-R-V	0.200164	-0.0291764	-0.153998	0.0291764
VEGFR-2-R-V	0.225643	0.0600487	-0.0689661	-0.0600487
PAR-R-C	0.432303	-0.0606118	0.0606118	-0.429546
