# Supplementary material for: Differentiated glioma cell-derived fibromodulin activates integrin-dependent Notch signaling in endothelial cells to promote tumor angiogenesis and growth
Source: eLife journal article supplement (doi:10.7554/elife.78972), 2022-06-01
Supplement: fig4-data2 [file RT-QPCR VALUES FOR PANEL B.xlsx]

## Sheet: Sheet1
	HES1		ATP5g		avg hes	avg atp	nom hes	fc	l2fc	2^
0 hr	32	33	26.4	26.5	32.5	26.45	6.05
12 hr	29.5	29.7	26.23	26.45	29.6	26.34	3.26	-2.79	2.79	6.9163
24 hr	25.8	26.1	26.14	26.54	25.95	26.34	-0.39	-3.65	3.65	12.5533
0hr	33.1	32.7	26.23	27.243	32.9	26.7365	6.1635
12 hr	32.1	31.45	25.23	26.16	31.775	25.695	6.08	-0.0835	0.0835	1.05959
24 hr	31.7	32.45	26.76	26.03	32.075	26.395	5.68	-0.4835	0.4835	1.39813
