# Supplementary material for: Differentiated glioma cell-derived fibromodulin activates integrin-dependent Notch signaling in endothelial cells to promote tumor angiogenesis and growth
Source: eLife journal article supplement (doi:10.7554/elife.78972), 2022-06-01
Supplement: fig4-data5 [file NUMBER OF NETWORKS FOR PANEL F.xlsx]

## Sheet: NUMBER OF NETWORKS
CONDITIONS	WELL1	WELL2	AVG	STDEV
VC+DMSO	103	110	106.5	4.94975
VC+H2O	110	103	106.5	4.94975
VC+FAK	12	20	16	5.65685
VC+RGD	90	81	85.5	6.36396
VC+Rac1	105	120	112.5	10.6066
VC+Rock1	121	135	128	9.89949
VC+PP2	18	12	15	4.24264
VC+PP3	99	91	95	5.65685
VC+LY	63	60	61.5	2.12132
VC+Bay	25	31	28	4.24264
FMOD+DMSO	185	175	180	7.07107
FMOD+H2O	181	190	185.5	6.36396
FMOD+FAK	20	30	25	7.07107
FMOD+RGD	101	108	104.5	4.94975
FMOD+Rac1	172	179	175.5	4.94975
FMOD+Rock1	190	199	194.5	6.36396
FMOD+PP2	14	18	16	2.82843
FMOD+PP3	158	146	152	8.48528
FMOD+LY	98	85	91.5	9.19239
FMOD+Bay	19	30	24.5	7.77817
