# Supplementary material for: Differentiated glioma cell-derived fibromodulin activates integrin-dependent Notch signaling in endothelial cells to promote tumor angiogenesis and growth
Source: eLife journal article supplement (doi:10.7554/elife.78972), 2022-06-01
Supplement: fig4-data6 [file RT-QPCR DATA FOR PANEL G.xlsx]

## Sheet: RT-QPCR VALUES
	HES1		ATP5g		avg hes	avg atp	nom hes	fc	l2fc	2^
0 hr	32	33	26.4	26.5	32.5	26.45	6.05
12 hr	28.76	28.9	26.23	26.45	28.83	26.34	2.49	-3.56	3.56	11.7942
24 hr	25.8	25.87	26.14	26.54	25.835	26.34	-0.505	-2.995	2.995	7.97232
0hr	33.1	32.7	26.23	27.243	32.9	26.7365	6.1635
12 hr	31.1	30.45	25.23	26.16	30.775	25.695	5.08	-1.0835	1.0835	2.11917
24 hr	30.7	31.45	26.76	26.03	31.075	26.395	4.68	-1.4835	1.4835	2.79626
