# Supplementary material for: Differentiated glioma cell-derived fibromodulin activates integrin-dependent Notch signaling in endothelial cells to promote tumor angiogenesis and growth
Source: eLife journal article supplement (doi:10.7554/elife.78972), 2022-06-01
Supplement: fig4-data7 [file RTQPCR DATA FOR PANEL J.xlsx]

## Sheet: Sheet1
	JAG1		ATP5g		avg hes	avg atp	nom hes	fc	l2fc	2^
0 hr	30	30.3	26.4	26.5	30.15	26.45	3.7
12 hr	27.9	27.7	25.3	26.45	27.8	25.875	1.925	-1.775	1.775	3.42238
24 hr	26.23	26.1	26.14	26.54	26.165	26.34	-0.175	-2.1	2.1	4.28709
0hr	33.1	32.7	26.23	27.243	32.9	26.7365	6.1635
12 hr	31.1	30.45	25.23	26.16	30.775	25.695	5.08	-1.0835	1.0835	2.11917
24 hr	31.7	30.45	26.76	26.03	31.075	26.395	4.68	-1.4835	1.4835	2.79626
