# Supplementary material for: Differentiated glioma cell-derived fibromodulin activates integrin-dependent Notch signaling in endothelial cells to promote tumor angiogenesis and growth
Source: eLife journal article supplement (doi:10.7554/elife.78972), 2022-06-01
Supplement: fig4-data9 [file NUMBER OF NETWORKS FOR PANEL L.xlsx]

## Sheet: NUMBER OF NETWORKS
CONDITIONS	WELL1	WELL2
POSITIVE CONTROL	99	101
NEGATIVE CONTROL	5	9
STI/SHNT+BSA	13	18
ST1/SHJAG1+BSA	11	15
STI/SHNT+RHFMOD	62	73
ST1/SHJAG1+RHFMOD	13	12
