# Supplementary material for: Differentiated glioma cell-derived fibromodulin activates integrin-dependent Notch signaling in endothelial cells to promote tumor angiogenesis and growth
Source: eLife journal article supplement (doi:10.7554/elife.78972), 2022-06-01
Supplement: fig4-figsupp1-data1 [file LUC READINGS FOR PANEL A AND B.xlsx]

## Sheet: PANEL A CSL LUC
CONDITIONS	LUC READING	LUC READING	AVG LUC	BETA-GAL READING	BETA-GAL READING	AVG BETAGAL	NORMALISED LUC READING	AVG LUC NOMALISED
CSL Poly Neo2-1	6544	6599	6571.5	0.453	0.451	0.452	6599	6749
CSL Poly Neo2-2	6322	6298	6310	0.392	0.294	0.343	6899
CSL NIC1-1	57855	59766	58810.5	0.388	0.378	0.383	6344	6188.5
CSL NIC1-2	56432	55678	56055	0.411	0.402	0.4065	6033
CSL Poly Neo2-1-WT	5678	5233	5455.5	0.423	0.434	0.4285	5600	5419.5
CSL Poly Neo2-2-WT	5245	4988	5116.5	0.399	0.387	0.393	5239
CSL NIC1-1-GSI	61233	62356	61794.5	0.38	0.366	0.373	63456	64026
CSL NIC1-1-GSI	62433	62564	62498.5	0.413	0.406	0.4095	64596
CSL BSA1	3451	3422	3436.5	0.397	0.381	0.389	3768	3612.5
CSL BSA2	3673	3561	3617	0.406	0.423	0.4145	3457
CSL BSA-GSI-1	2980	3128	3054	0.402	0.419	0.4105	3145	3010.5
CSL BSA-GSI-2	2765	2987	2876	0.431	0.453	0.442	2876
CSL rhF-1	71231	72344	71787.5	0.399	0.412	0.4055	72345	75501
CSL rhF-2	73452	71272	72362	0.379	0.389	0.384	78657
CSL rhF-GSI-1	5464	5233	5348.5	0.423	0.411	0.417	5567	5773.5
CSL rhF-GSI-2	5781	5677	5729	0.414	0.401	0.4075	5980

## Sheet: PANEL B-HES LUC
CONDITIONS	LUC READING	LUC READING	AVG LUC	BETA-GAL READING	BETA-GAL READING	AVG BETAGAL	NORMALISED LUC READING	ST.Dev
CSL +BSA	2245	2343	2294	0.453	0.451	0.452	2245
CSL+ Water	1798	1987	1892.5	0.392	0.394	0.393	2134
CSL+BSA+ WT	2453	2234	2343.5	0.388	0.378	0.383	2654
CSL+BSA+MUT	2399	2654	2526.5	0.411	0.402	0.4065	2398
CSL +rhFMOD	65432	64356	64894	0.423	0.434	0.4285	66453
CSL+ rhFMOD+WT	7896	7678	7787	0.399	0.387	0.393	8976
CSL+rhFMOD+MUT	60765	60997	60881	0.38	0.39	0.385	62337
HES +BSA	3899	3500	3699.5	0.398	0.395	0.3965	3899
HES+ Water	3245	3343	3294	0.413	0.406	0.4095	3125
HES+BSA+ WT	3123	3213	3168	0.406	0.396	0.401	3206
HES+BSA+MUT	2977	2879	2928	0.365	0.349	0.357	3190
HES +rhFMOD	45645	45887	45766	0.376	0.37	0.373	48765
HES+ rhFMOD+WT	8798	8897	8847.5	0.397	0.389	0.393	8677
HES+rhFMOD+MUT	43556	43675	43615.5	0.403	0.406	0.4045	42335
CSL +BSA	2245	897
CSL+ Water	2134	987
CSL+BSA+ WT	2654	1345
CSL+BSA+MUT	2398	998
CSL +rhFMOD	66453	12775
CSL+ rhFMOD+WT	24976	3866
CSL+rhFMOD+MUT	60337	10432
HES +BSA	3899	999
HES+ Water	3125	987
HES+BSA+ WT	3206	656
HES+BSA+MUT	3190	889
HES +rhFMOD	48765	7898
HES+ rhFMOD+WT	13677	1288
HES+rhFMOD+MUT	42335	6788
