# Supplementary material for: Differentiated glioma cell-derived fibromodulin activates integrin-dependent Notch signaling in endothelial cells to promote tumor angiogenesis and growth
Source: eLife journal article supplement (doi:10.7554/elife.78972), 2022-06-01
Supplement: fig4-figsupp1-data1 [file LUC VALUES FOR PANELS E AND F.xlsx]

## Sheet: CSL-GSI SET1 9.2.18
CONDITIONS	LUC READING	LUC READING	AVG LUC	BETA-GAL READING	BETA-GAL READING	AVG BETAGAL	NORMALISED LUC READING	AVG LUC NORMALISED
CSL Poly Neo2-1	3210	3766	3488	0.23	0.236	0.233	3488	3367.75
CSL Poly Neo2-2	3233	3462	3347.5	0.299	0.291	0.295	3247.5
CSL NIC1-1	62388	61946	62167	0.323	0.321	0.322	52167	52064.5
CSL NIC1-2	61590	62334	61962	0.309	0.305	0.307	51962
CSL Poly Neo2-1-GSI	3150	3280	3215	0.245	0.241	0.243	3315	3169.75
CSL Poly Neo2-2-GSI	3014	3035	3024.5	0.233	0.241	0.237	3024.5
CSL NIC1-1-GSI	57553	57664	57608.5	0.298	0.294	0.296	56608.5	57384.2
CSL NIC1-2-GSI	58996	59324	59160	0.236	0.246	0.241	58160
CSL BSA1	4564	4355	4459.5	0.311	0.319	0.315	4459.5	4756
CSL BSA2	5132	5173	5152.5	0.353	0.341	0.347	5052.5
CSL BSA-GSI-1	3288	3201	3244.5	0.3121	0.322	0.31705	3244.5	3568.5
CSL BSA-GSI-2	3766	3619	3692.5	0.294	0.283	0.2885	3892.5
CSL rhF-1	28301	28854	28577.5	0.255	0.239	0.247	32577.5	35013
CSL rhF-2	31445	31452	31448.5	0.287	0.289	0.288	37448.5
CSL rhF-GSI-1	2297	2216	2256.5	0.329	0.349	0.339	2656.5	2435.25
CSL rhF-GSI-2	2199	2029	2114	0.333	0.313	0.323	2214
CSL POLY NEO2	3367.75	1233
CSL POLY NE 2+GSI	3169.75	998
CSL NIC1	52064.5	8767
CSL NIC1 + GSI	57384.2	9455
CSL BSA	4756	1344
CSL BSA+GSI	3568.5	2122
CSL rhF	35013	1122
CSL rhF + GSI	2435.25	1233

## Sheet: CSL-rgd SET2 11.2.18
CONDITIONS	LUC READING	LUC READING	AVG LUC	BETA-GAL READING	BETA-GAL READING	AVG BETAGAL	NORMALISED LUC READING	AVG LUC NOMALISED
CSL Poly Neo2-1	6544	6599	6571.5	0.453	0.451	0.452	6599	6749
CSL Poly Neo2-2	6322	6298	6310	0.392	0.294	0.343	6899
CSL NIC1-1	57855	59766	58810.5	0.388	0.378	0.383	6344	6188.5
CSL NIC1-1	56432	55678	56055	0.411	0.402	0.4065	6033
CSL Poly Neo2-1-GSI	5678	5233	5455.5	0.423	0.434	0.4285	5600	5419.5
CSL Poly Neo2-2-GSI	5245	4988	5116.5	0.399	0.387	0.393	5239
CSL NIC1-1-GSI	61233	62356	61794.5	0.38	0.366	0.373	63456	64026
CSL NIC1-1-GSI	62433	62564	62498.5	0.413	0.406	0.4095	64596
CSL BSA1	3451	3422	3436.5	0.397	0.381	0.389	3768	3612.5
CSL BSA2	3673	3561	3617	0.406	0.423	0.4145	3457
CSL BSA-GSI-1	2980	3128	3054	0.402	0.419	0.4105	3145	3010.5
CSL BSA-GSI-2	2765	2987	2876	0.431	0.453	0.442	2876
CSL rhF-1	71231	72344	71787.5	0.399	0.412	0.4055	72345	75501
CSL rhF-2	73452	71272	72362	0.379	0.389	0.384	78657
CSL rhF-GSI-1	5464	5233	5348.5	0.423	0.411	0.417	5567	5773.5
CSL rhF-GSI-2	5781	5677	5729	0.414	0.401	0.4075	5980
CSL Poly Neo2	6749	1232
CSL NIC1	69877	6599
CSL PolyNeo2+GSI	5419.5	1889
CSL NIC1+GS1	64026	7765
A	4612.5	1233
B	4010.5	1433			CSL BSA	3612.5
C	85501	5434			CSL BSA+RGD	3010.5
D	44473.5	2213			CSL rhF	75501
					CSL rhF+RGD	5773.5

## Sheet: HES LUC RGD
CONDITIONS	LUC READING	LUC READING	AVG LUC	BETA-GAL READING	BETA-GAL READING	AVG BETAGAL	NORMALISED LUC READING
HES Poly Neo2-1	4754	4655	4991.25	0.433	0.431	0.425
HES Poly Neo2-2	5123	5433		0.423	0.413
HES NIC1-1	82344	81330	82057.5	0.456	0.435	0.42545
HES NIC1-1	81234	83322		0.3988	0.412
HES Poly Neo2-1-RGD	4532	4577	4885	0.423	0.429	0.4175
HES Poly Neo2-2-RGD	5133	5298		0.417	0.401
HES NIC1-1-RGD	75434	72331	73387.8	0.389	0.39	0.40825
HES NIC1-1-RGD	72341	73445		0.422	0.432
HES BSA1	6545	6234	6311	0.467	0.454	0.426675
HES BSA2	6343	6122		0.3987	0.387
HES BSA-RGDI-1	5466	5432	5512.25	0.434	0.423	0.436
HES BSA-RGD-2	5478	5673		0.453	0.434
HES rhF-1	72342	71009	73833.2	0.422	0.415	0.43075
HES rhF-2	76545	75437		0.433	0.453
HES rhF-RGD-1	6545	6453	6288	0.453	0.423	0.427
HES rhF-RGD-2	6122	6032		0.421	0.411
