# Supplementary material for: Differentiated glioma cell-derived fibromodulin activates integrin-dependent Notch signaling in endothelial cells to promote tumor angiogenesis and growth
Source: eLife journal article supplement (doi:10.7554/elife.78972), 2022-06-01
Supplement: fig4-figsupp2-data1 [file NUMBER OF NETWORKS FOR PANEL D.xlsx]

## Sheet: Sheet1
		Negative Control	9	1
		Positive Control	100	11
		ST1/VC	18	3
		ST1/NICD	96	12
	ST1/VC	MGG8-DGC/shNT	113	19
		MGG8-DGC/shFMOD	21	6
	ST1/NICD	MGG8-DGC/shNT	103	11
		MGG8-DGC/shFMOD	92	12
