# Supplementary material for: Differentiated glioma cell-derived fibromodulin activates integrin-dependent Notch signaling in endothelial cells to promote tumor angiogenesis and growth
Source: eLife journal article supplement (doi:10.7554/elife.78972), 2022-06-01
Supplement: fig4-figsupp3-data1 [file elife-78972-fig4-figsupp3-data1-v3.zip]

**D**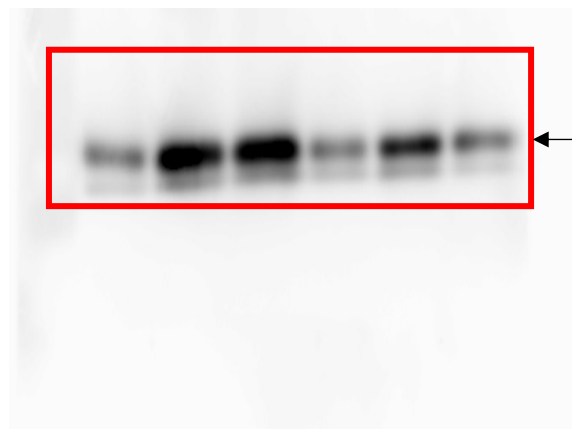

pFAK,  
125 kDa

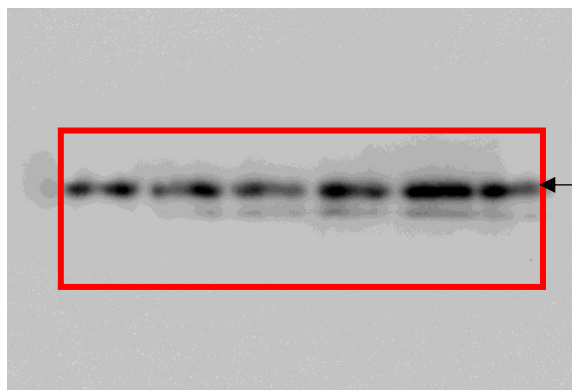

tFAK,  
125 kDa

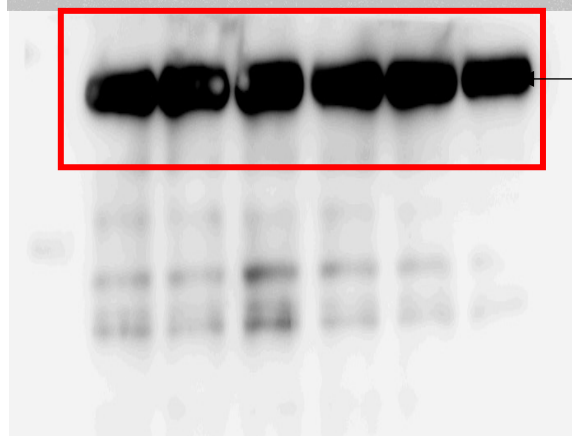

GAPDH,  
36 kDa

**E**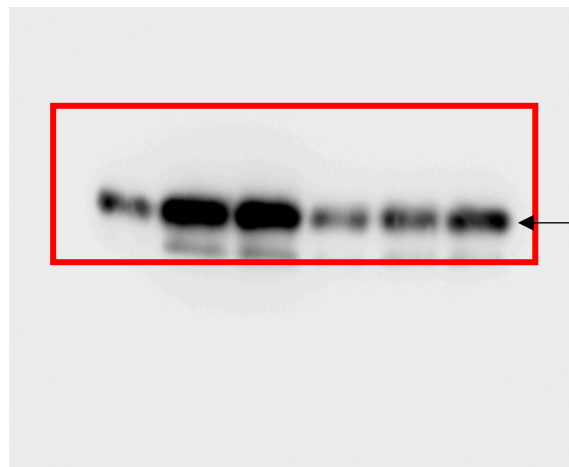

pFAK,  
125 kDa

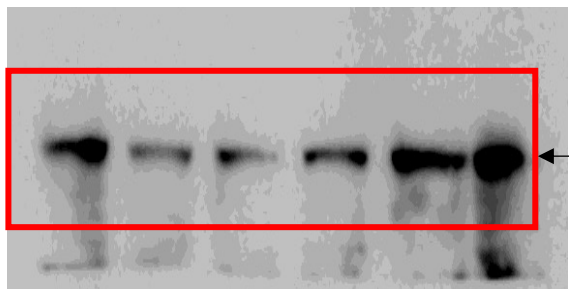

tFAK,  
125 kDa

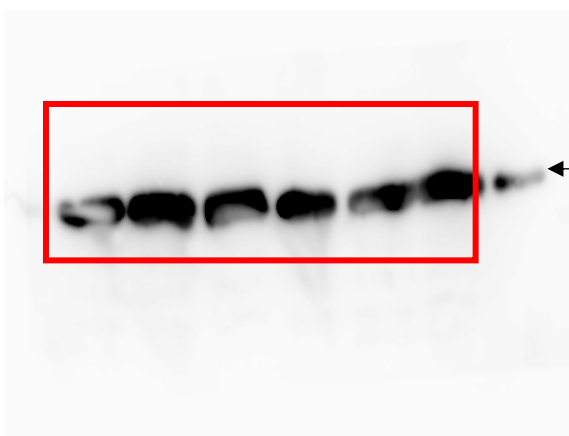

GAPDH,  
36 kDa

**F**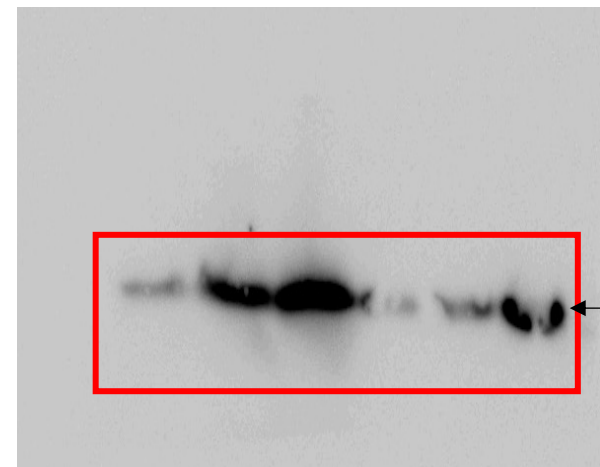

pFAK,  
125 kDa

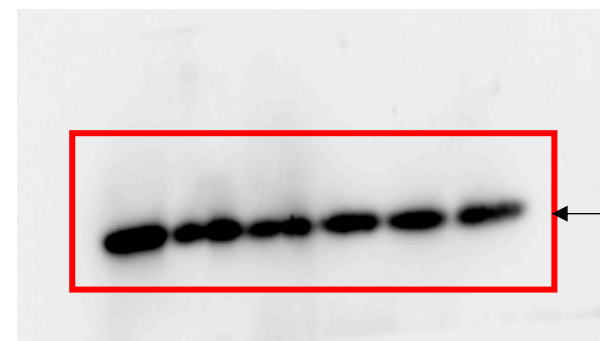

tFAK,  
125 kDa

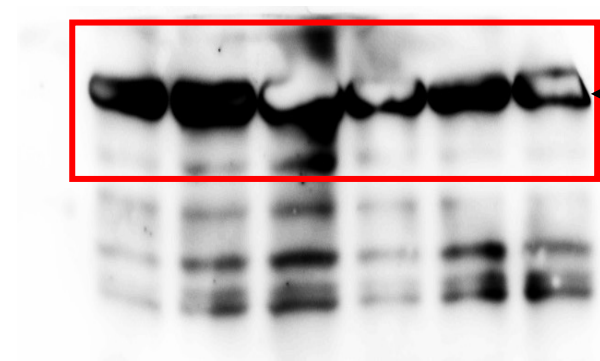

GAPDH,  
36 kDa

**G**

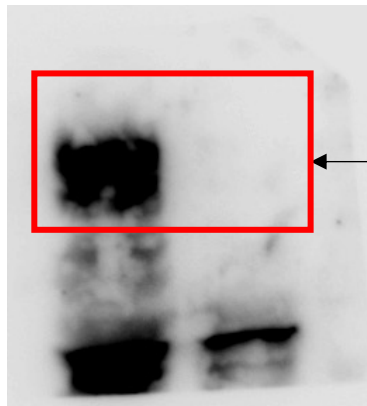

← **ITGB1, 115 kDa**

**H**

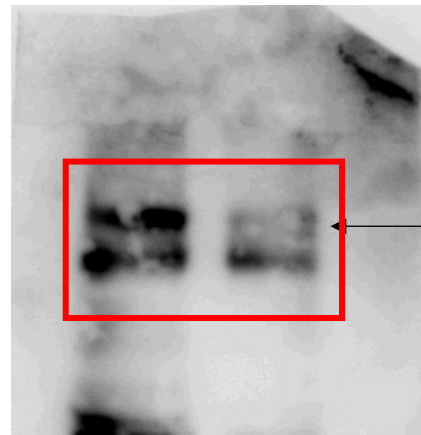

← **ITGAV, 135 kDa**

**I**

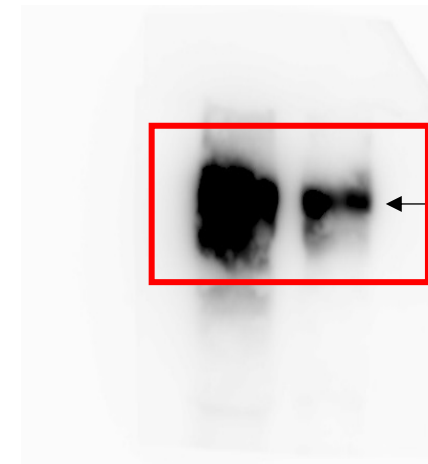

← **ITGA6, 127 kDa**

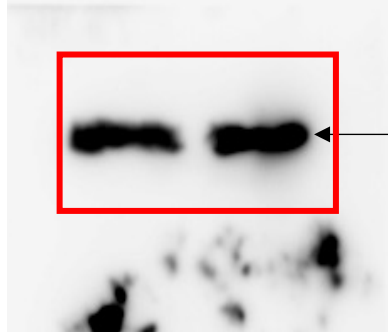

← **GAPDH,  
36 kDa**

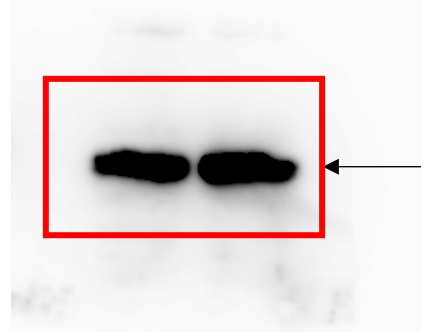

← **GAPDH,  
36 kDa**

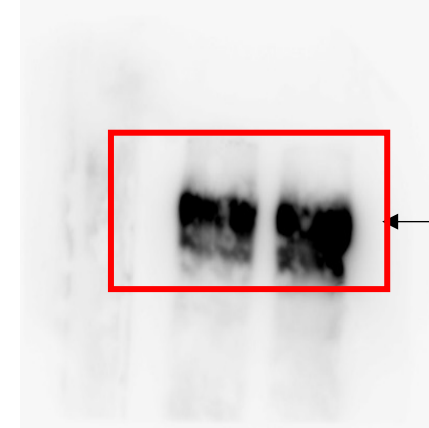

← **GAPDH,  
36 kDa**
