# Supplementary material for: Differentiated glioma cell-derived fibromodulin activates integrin-dependent Notch signaling in endothelial cells to promote tumor angiogenesis and growth
Source: eLife journal article supplement (doi:10.7554/elife.78972), 2022-06-01
Supplement: fig4-figsupp3-data1 [file LUC READINGS FOR PANELS A AND B.xlsx]

## Sheet: Sheet1
CONDITIONS	LUC READING	LUC READING	AVG LUC	BETA-GAL READING	BETA-GAL READING	AVG BETAGAL	NORMALISED LUC READING
CSL +BSA	2245	2343	2294	0.453	0.451	0.452	2245
CSL+ Water	1798	1987	1892.5	0.392	0.394	0.393	2134
CSL+BSA+ WT	2453	2234	2343.5	0.388	0.378	0.383	2654
CSL+BSA+MUT	2399	2654	2526.5	0.411	0.402	0.4065	2398
CSL +rhFMOD	65432	64356	64894	0.423	0.434	0.4285	66453
CSL+ rhFMOD+WT	7896	7678	7787	0.399	0.387	0.393	8976
CSL+rhFMOD+MUT	60765	60997	60881	0.38	0.39	0.385	62337
HES +BSA	3899	3500	3699.5	0.398	0.395	0.3965	3899
HES+ Water	3245	3343	3294	0.413	0.406	0.4095	3125
HES+BSA+ WT	3123	3213	3168	0.406	0.396	0.401	3206
HES+BSA+MUT	2977	2879	2928	0.365	0.349	0.357	3190
HES +rhFMOD	45645	45887	45766	0.376	0.37	0.373	48765
HES+ rhFMOD+WT	8798	8897	8847.5	0.397	0.389	0.393	8677
HES+rhFMOD+MUT	43556	43675	43615.5	0.403	0.406	0.4045	42335
