# Supplementary material for: Differentiated glioma cell-derived fibromodulin activates integrin-dependent Notch signaling in endothelial cells to promote tumor angiogenesis and growth
Source: eLife journal article supplement (doi:10.7554/elife.78972), 2022-06-01
Supplement: fig4-figsupp3-data1 [file NUMBER OF NETWORKS FOR PANEL C.xlsx]

## Sheet: Sheet1
BSA	48	45	46.5	2.12132
BSA+MUT	42	49	45.5	4.94975
BSA+WT	49	46	47.5	2.12132
rhFMOD	174	176	175	1.41421
rhFMOD+MUT	149	155	152	4.24264
rhFMOD+WT	79	65	72	9.89949
