# Supplementary material for: Differentiated glioma cell-derived fibromodulin activates integrin-dependent Notch signaling in endothelial cells to promote tumor angiogenesis and growth
Source: eLife journal article supplement (doi:10.7554/elife.78972), 2022-06-01
Supplement: fig4-figsupp4-data1 [file elife-78972-fig4-figsupp4-data1-v3.zip]

## Sheet: PANEL A
	AVG. normalised luc readings x 10^4
BSA	1.2
BSA +FAK1	1.5
rhF	8.3
rhF+Faki	4

## Sheet: PANEL B
	AVG. normalised luc readings x 10^4
BSA	1.8
BSA +FAK1	1.9
rhF	13
rhF+Faki	4.5

## Sheet: PANEL C
	AVG. normalised luc readings x 10^4
BSA	1.2
BSA	1
rhF	14.8
rhF+PP2	7.2
rhF+PP3	17

## Sheet: PANEL D
	AVG. normalised luc readings x 10^4
BSA	1
BSA	0.8
rhF	9.9
rhF+PP2	4.3
rhF+PP3	10.5
