# Supplementary material for: Differentiated glioma cell-derived fibromodulin activates integrin-dependent Notch signaling in endothelial cells to promote tumor angiogenesis and growth
Source: eLife journal article supplement (doi:10.7554/elife.78972), 2022-06-01
Supplement: fig4-figsupp4-data1 [file RT-QPCR VALUES FOR PANEL E.xlsx]

## Sheet: Sheet1
	0	12	24
ST1+RHFMOD	1	5.1	5.8
ST1+FAKI+RHFMOD	1.6	3.9	3.8
