# Supplementary material for: Differentiated glioma cell-derived fibromodulin activates integrin-dependent Notch signaling in endothelial cells to promote tumor angiogenesis and growth
Source: eLife journal article supplement (doi:10.7554/elife.78972), 2022-06-01
Supplement: fig4-figsupp4-data1 [file RT-QPCR VALUES FOR PANEL G.xlsx]

## Sheet: Sheet1
	0	12	24
ST1+RHFMOD	1	5.3	6.5
ST1+PP2+RHFMOD	1.2	3.5	2.5
ST1+PP3+RHFMOD		5.9	6.8
