# Supplementary material for: Differentiated glioma cell-derived fibromodulin activates integrin-dependent Notch signaling in endothelial cells to promote tumor angiogenesis and growth
Source: eLife journal article supplement (doi:10.7554/elife.78972), 2022-06-01
Supplement: fig4-figsupp5-data1 [file C.xlsx]

## Sheet: Sheet1
	0	12	24
rhF	1	3.7	4
PP2+rhF	1.2	2.2	1.5
PP3+rhF		4.2	4.5
