# Supplementary material for: Differentiated glioma cell-derived fibromodulin activates integrin-dependent Notch signaling in endothelial cells to promote tumor angiogenesis and growth
Source: eLife journal article supplement (doi:10.7554/elife.78972), 2022-06-01
Supplement: fig4-figsupp5-data1 [file D1.xlsx]

## Sheet: Sheet1
	Luc1	Luc2	Avg Luc	B-gal1	B-gal2	Avg Bgal	Normalised
St1/shNt	4000	4650	4325	0.365	0.387	0.376	11502.7
St1/shNt+rhFMOD	32598	31654	32126	0.343	0.332	0.3375	95188.1
St1/shJAG1	6540	6870	6705	0.387	0.394	0.3905	17170.3
St1/shJAG1	20441	21776	21108.5	0.322	0.356	0.339	62267
