# Supplementary material for: Differentiated glioma cell-derived fibromodulin activates integrin-dependent Notch signaling in endothelial cells to promote tumor angiogenesis and growth
Source: eLife journal article supplement (doi:10.7554/elife.78972), 2022-06-01
Supplement: fig4-figsupp5-data1 [file E1.xlsx]

## Sheet: Sheet1
	Luc1	Luc2	Avg Luc	B-gal1	B-gal2	Avg Bgal	Normalised
St1/shNt	2000	2150	2075	0.365	0.387	0.376	5518.62
St1/shNt+rhFMOD	25598	25654	25626	0.343	0.332	0.3375	75928.9
St1/shJAG1	6140	6170	6155	0.387	0.394	0.3905	15761.8
St1/shJAG1	17441	16776	17108.5	0.322	0.356	0.339	50467.6
