# Supplementary material for: Differentiated glioma cell-derived fibromodulin activates integrin-dependent Notch signaling in endothelial cells to promote tumor angiogenesis and growth
Source: eLife journal article supplement (doi:10.7554/elife.78972), 2022-06-01
Supplement: fig4-figsupp5-data1 [file elife-78972-fig4-figsupp5-data1-v3.zip]

**Figure 1**

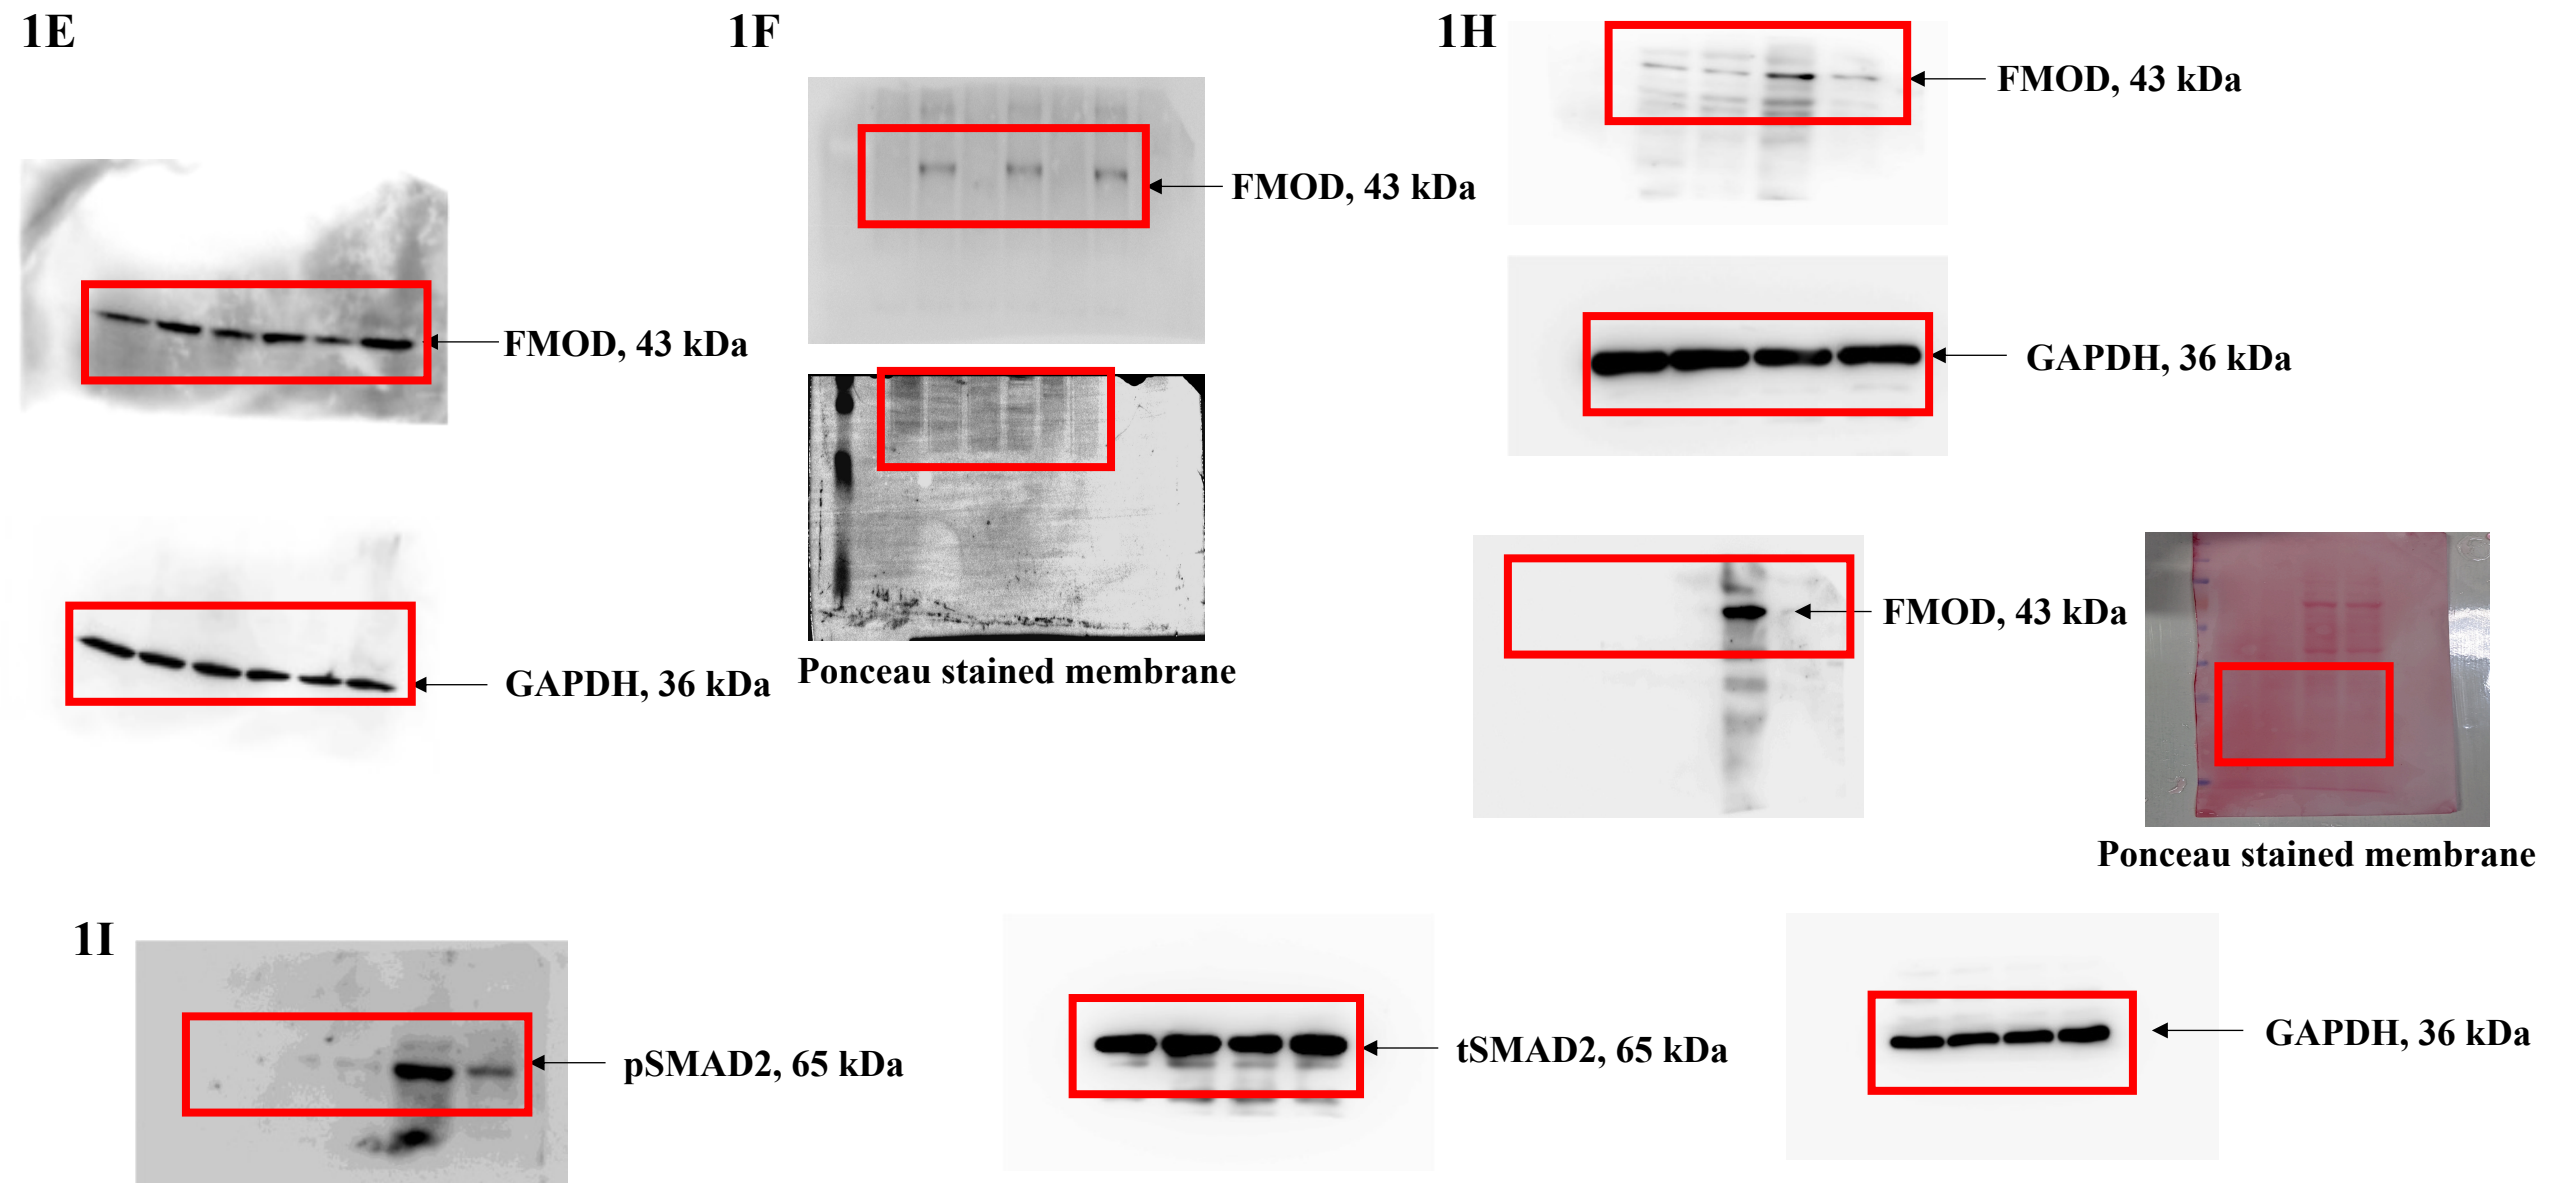

 The red box indicates that the marked lanes are from the relevant experiment that has been shown in the manuscript and shown in the figure

3H

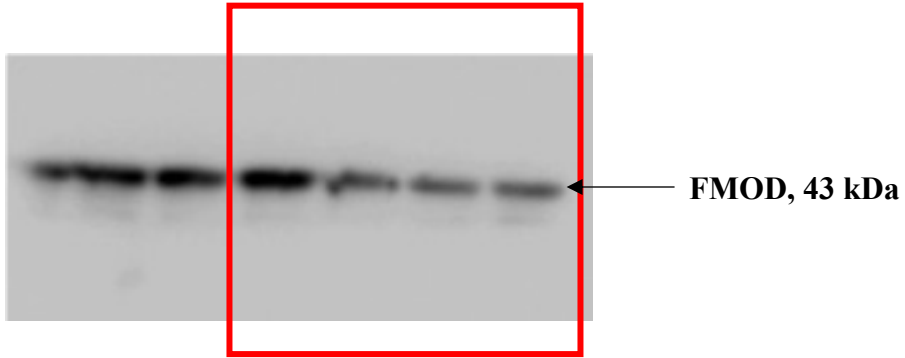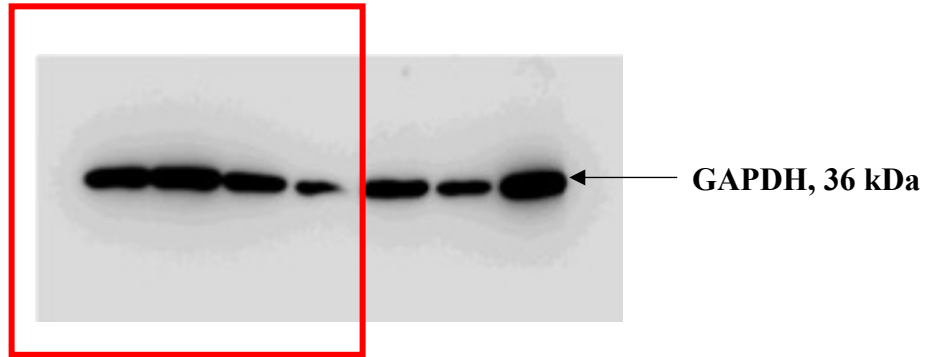

Figure 3

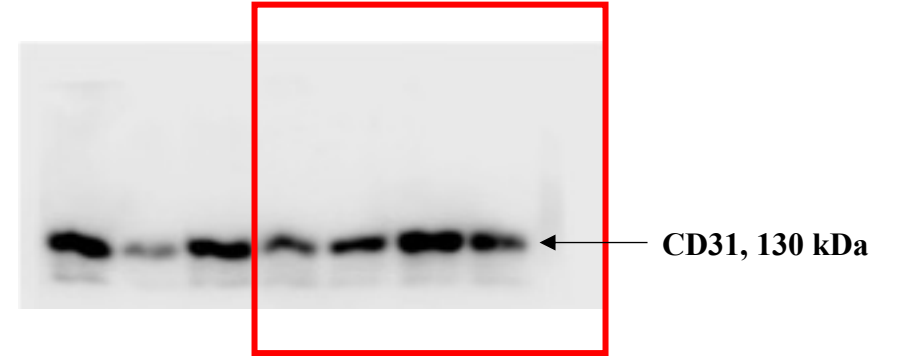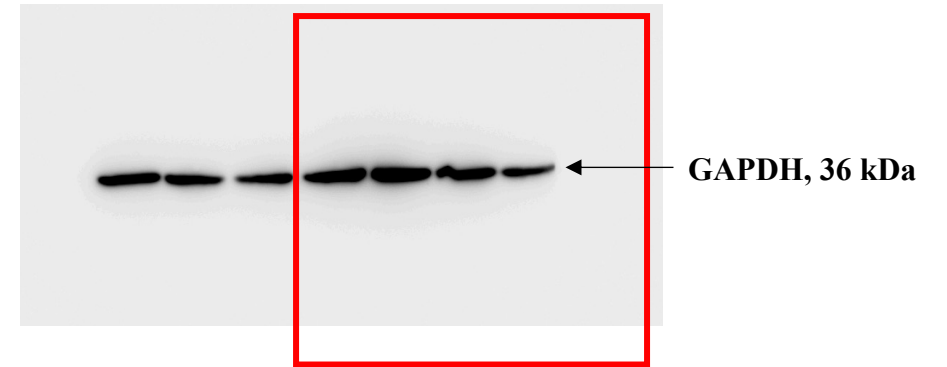

This blot got flipped while developing, the correct order has been put in the main text file, while the raw image has the original version.

**Figure 4**

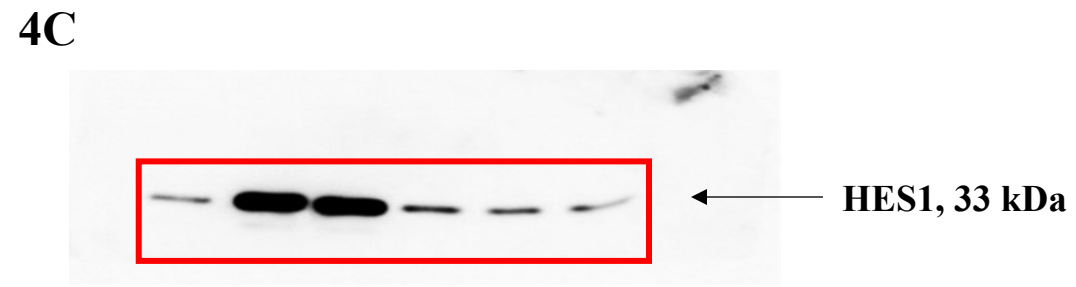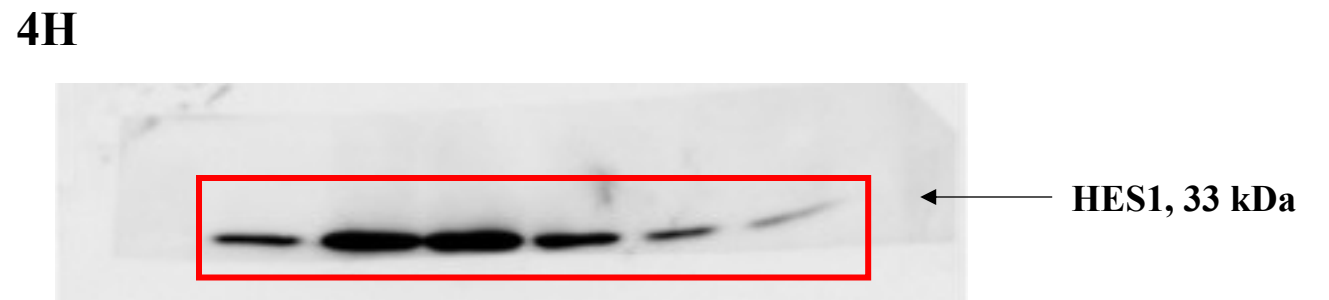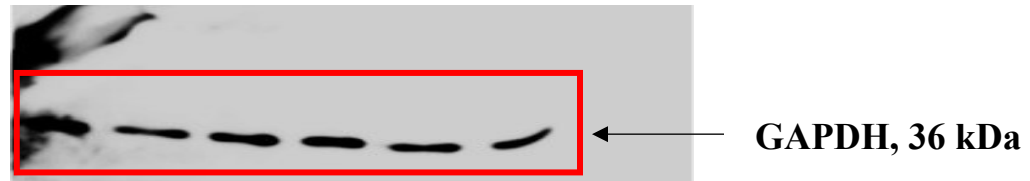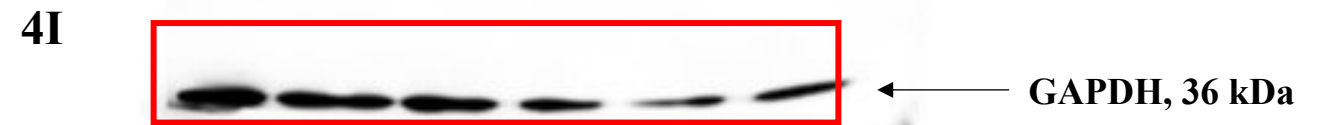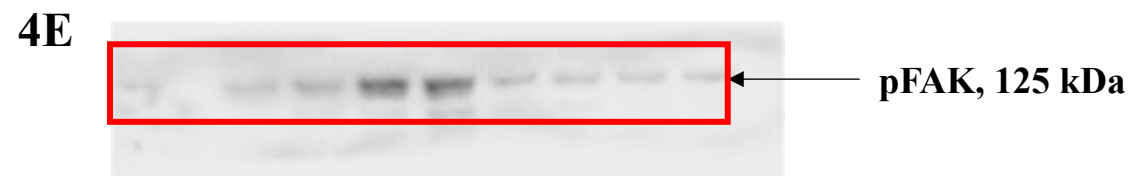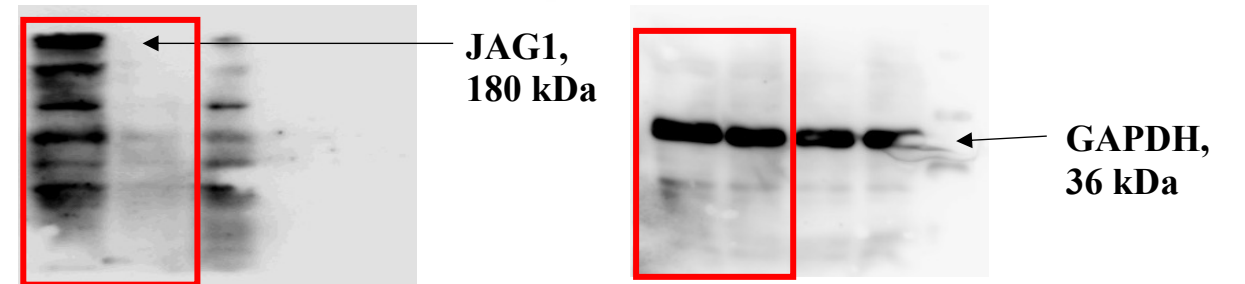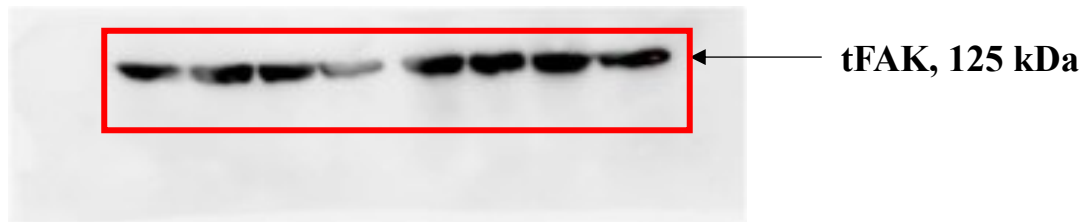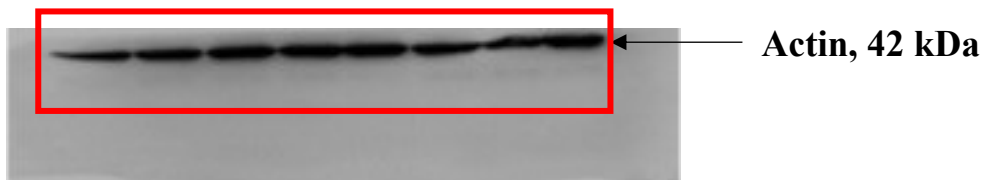

**Figure 4**

**4K**

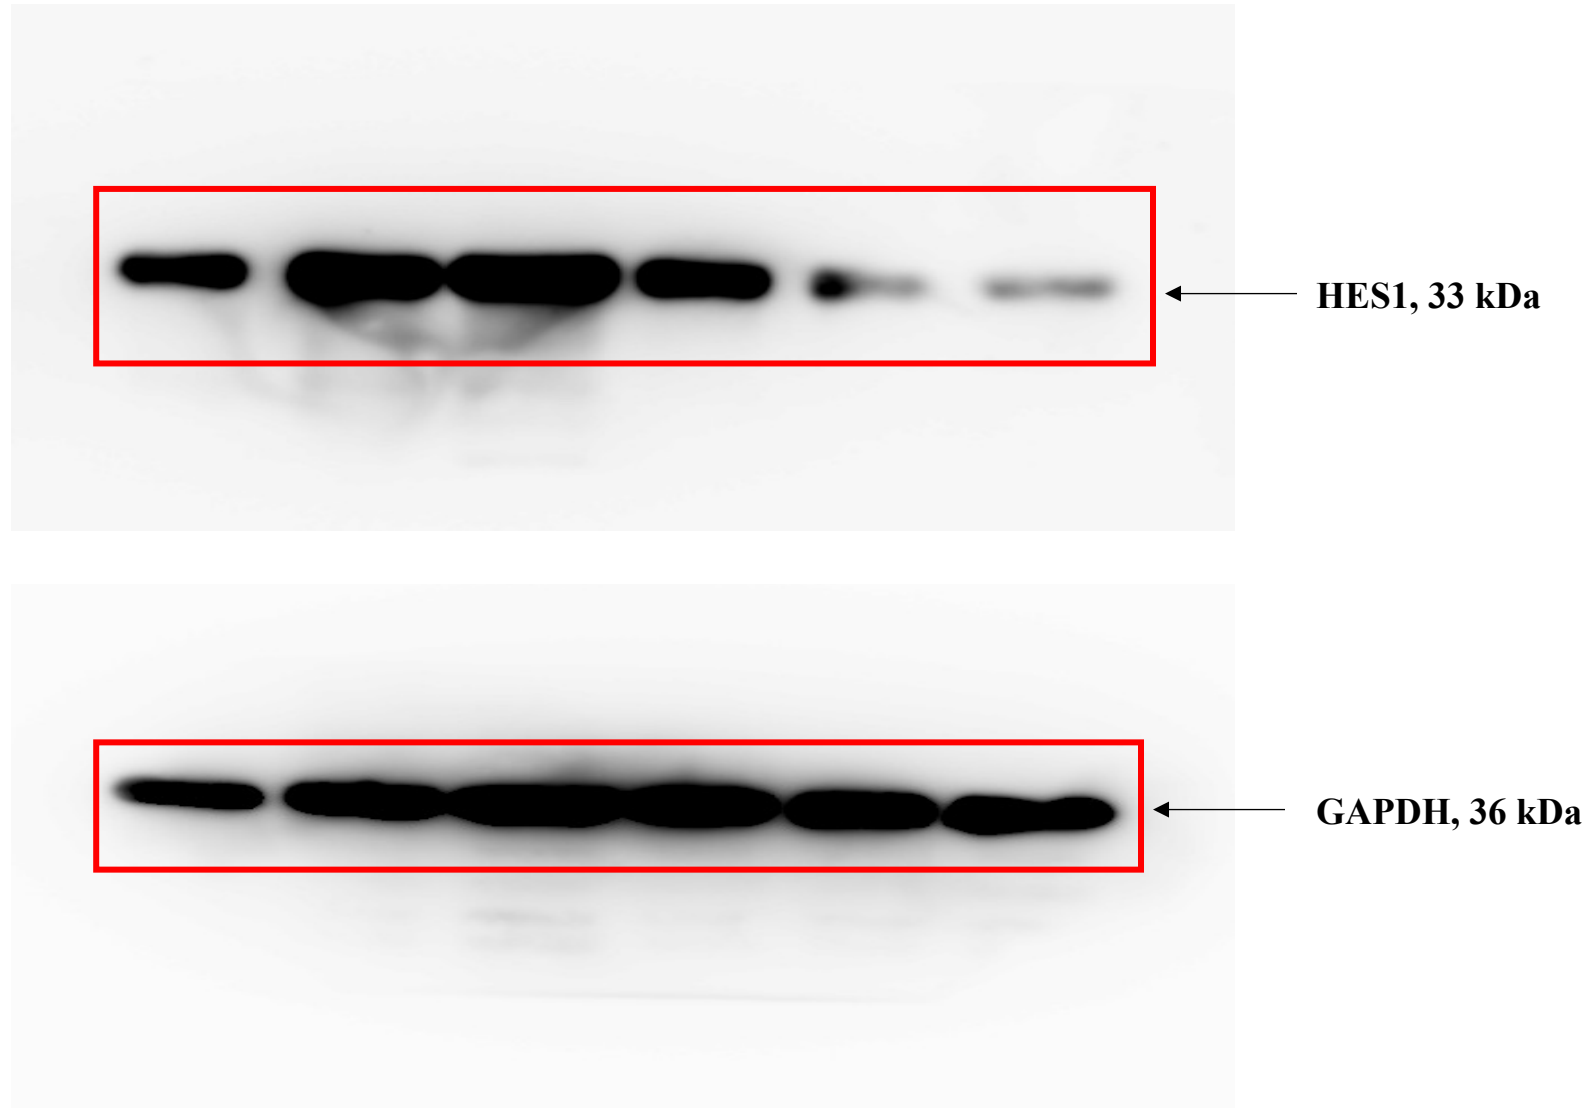



## Supplementary Figure 6

6A

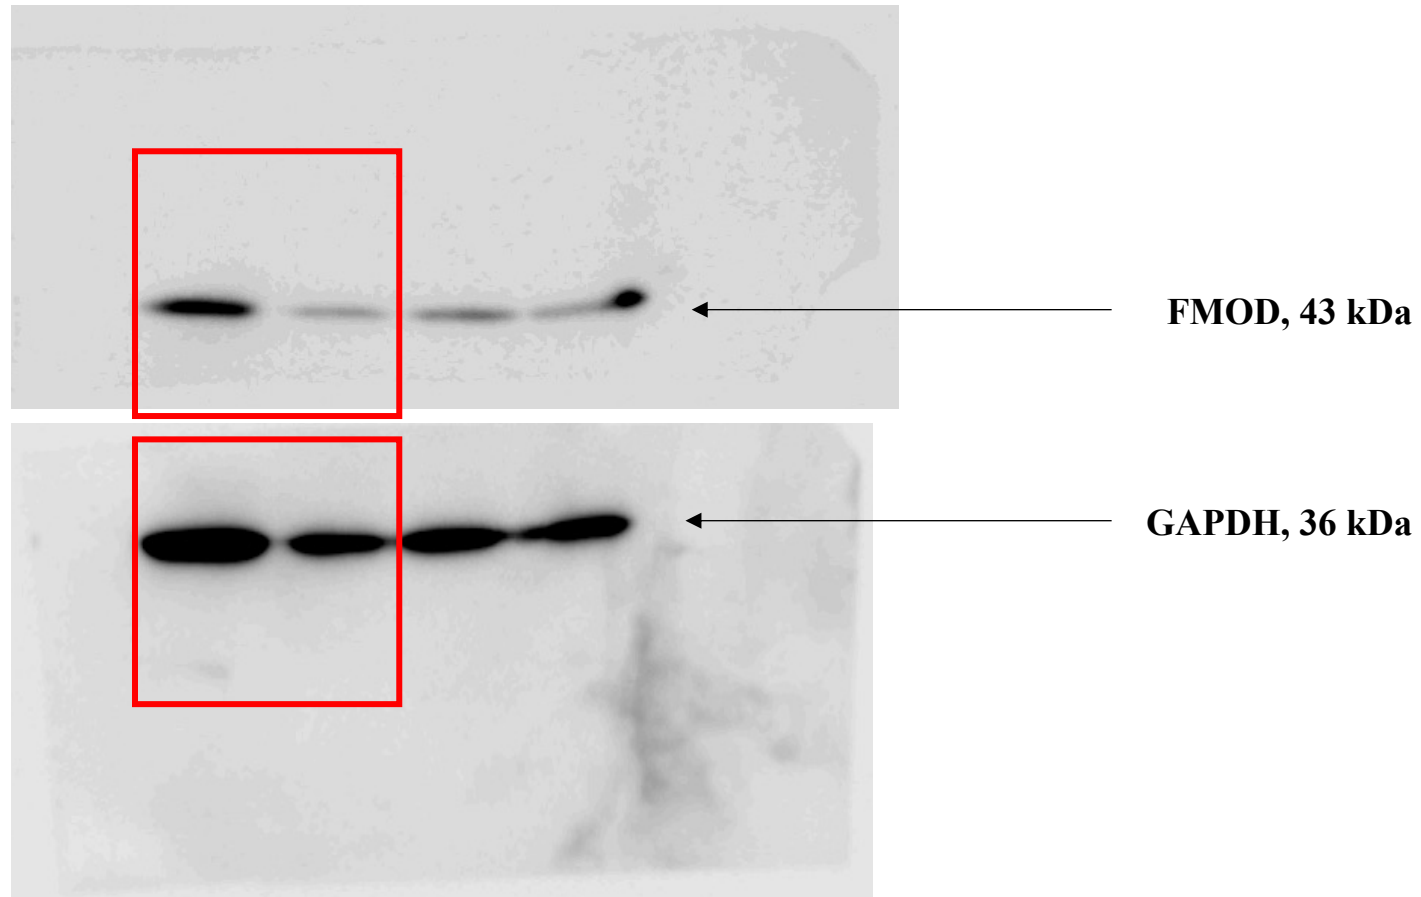

Supplementary Figure 7

7B

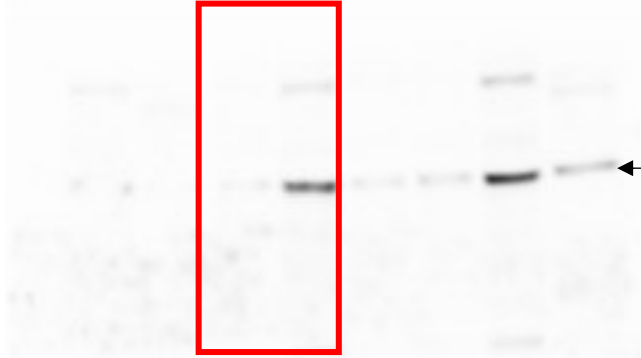

FMOD, 43 kDa

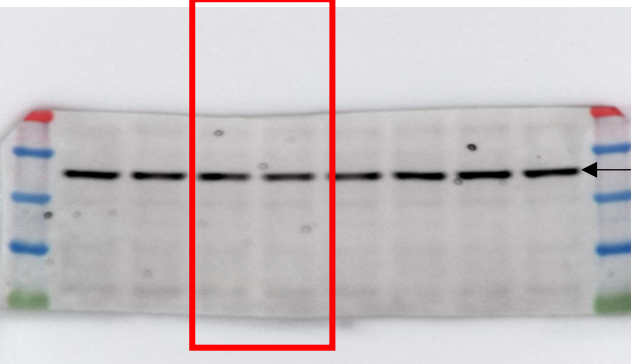

Tubulin, 50kDa

7E

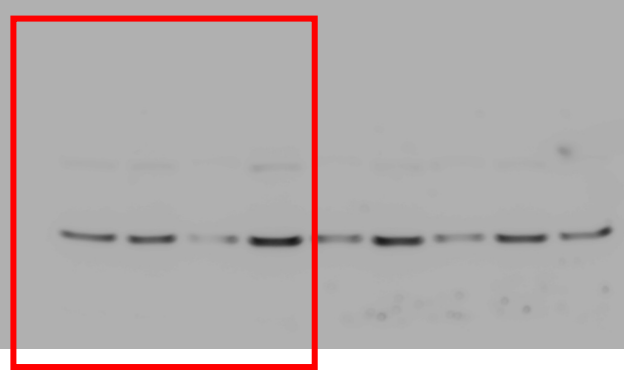

FMOD, 43 kDa

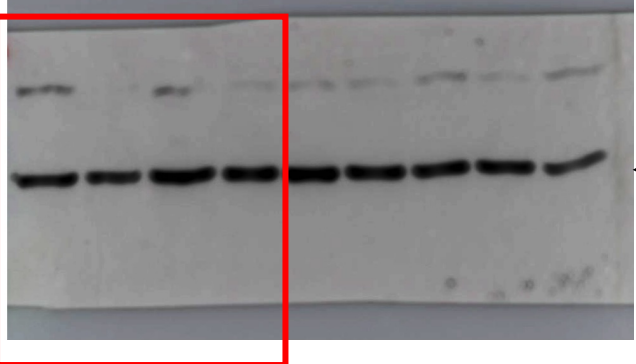

Tubulin, 50kDa

## Supplementary Figure 7

7C

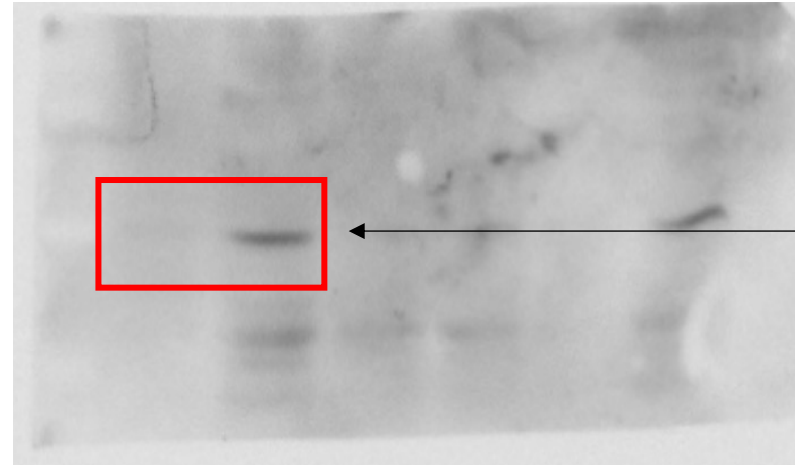

FMOD, 43 kDa

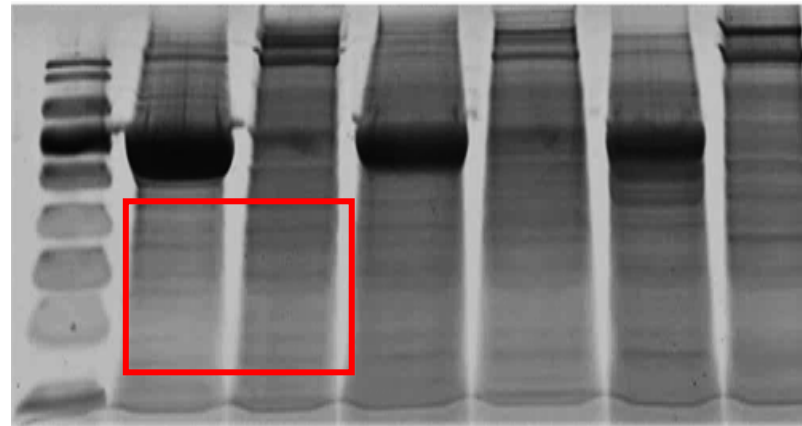

Ponceau stained membrane

Supplementary Figure 10

10C

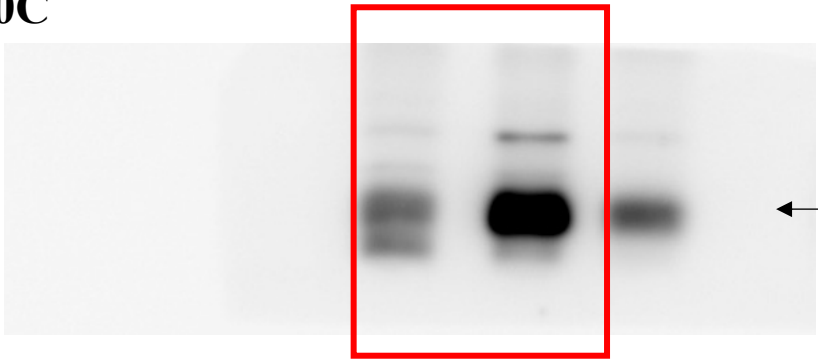

10I

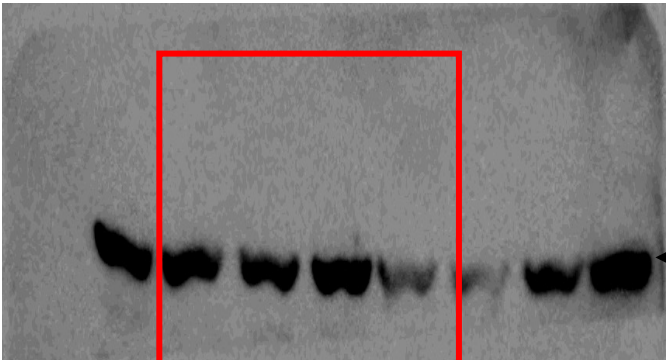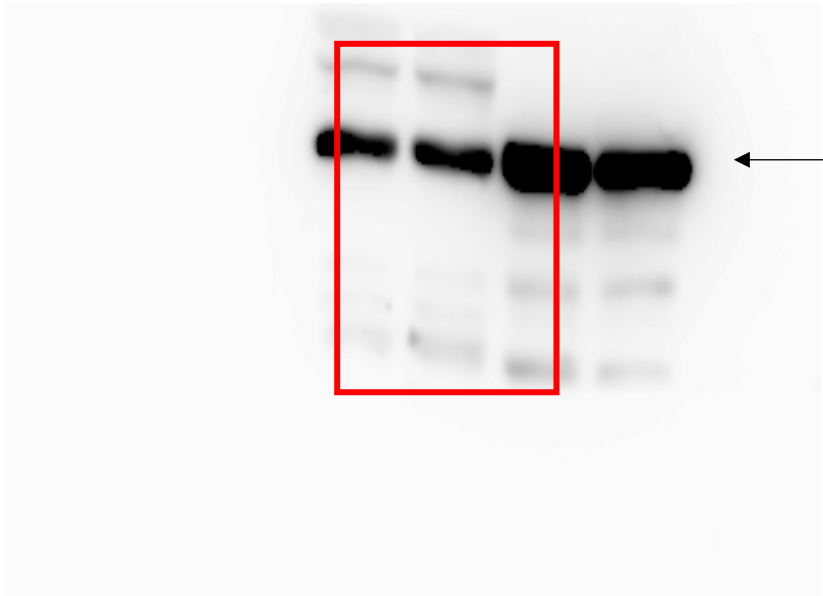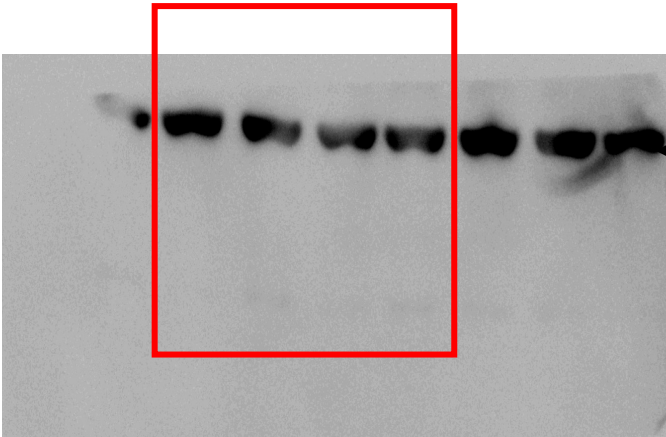

FMOD, 43 kDa

FMOD, 43 kDa

Tubulin, 50kDa

Tubulin, 50kDa

## Supplementary Figure 11

Gel pic

11A

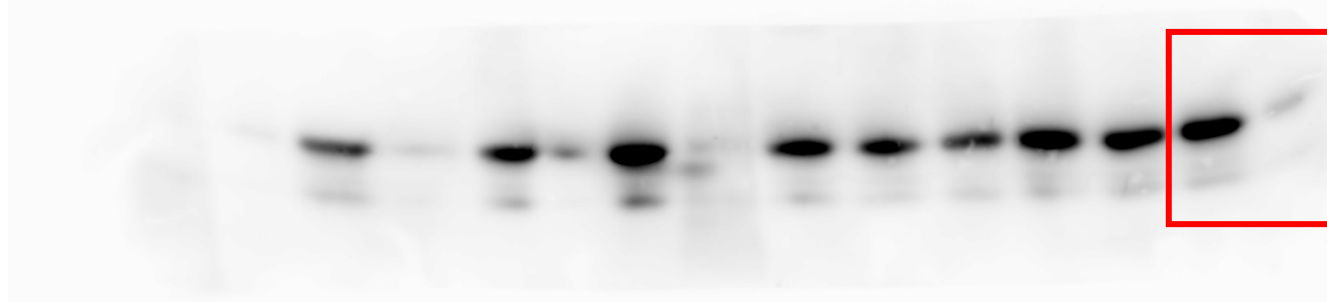

FMOD, 43 kDa

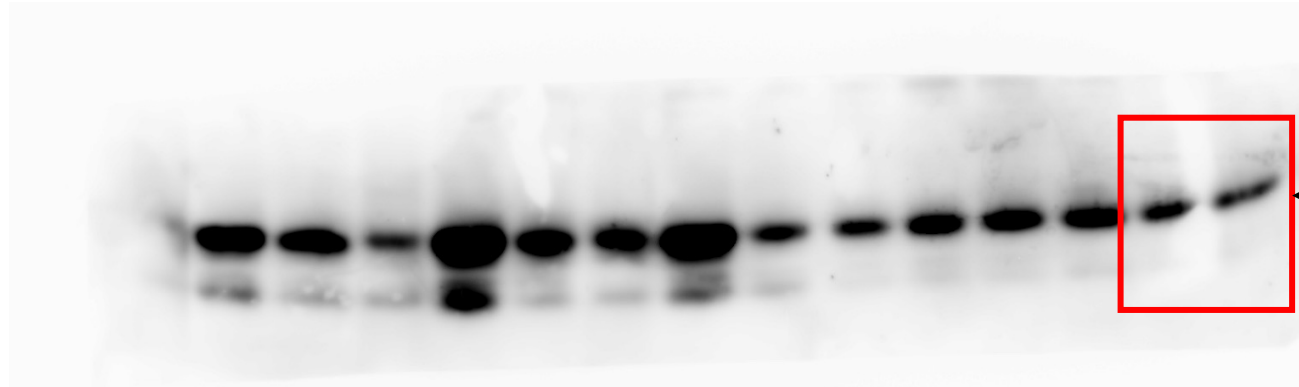

GAPDH, 36 kDa

## Supplementary Figure 12

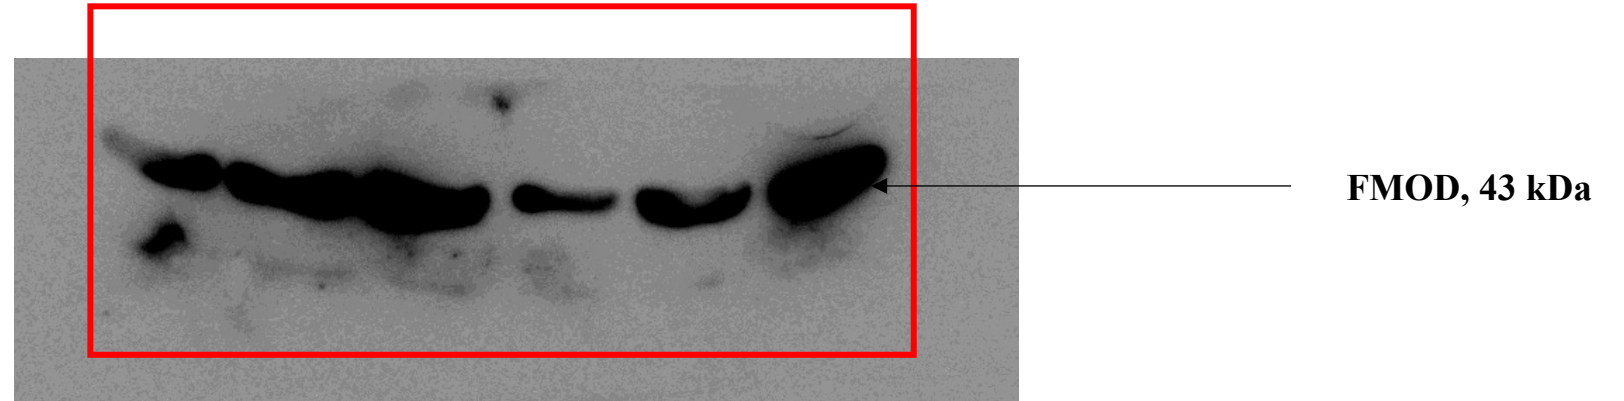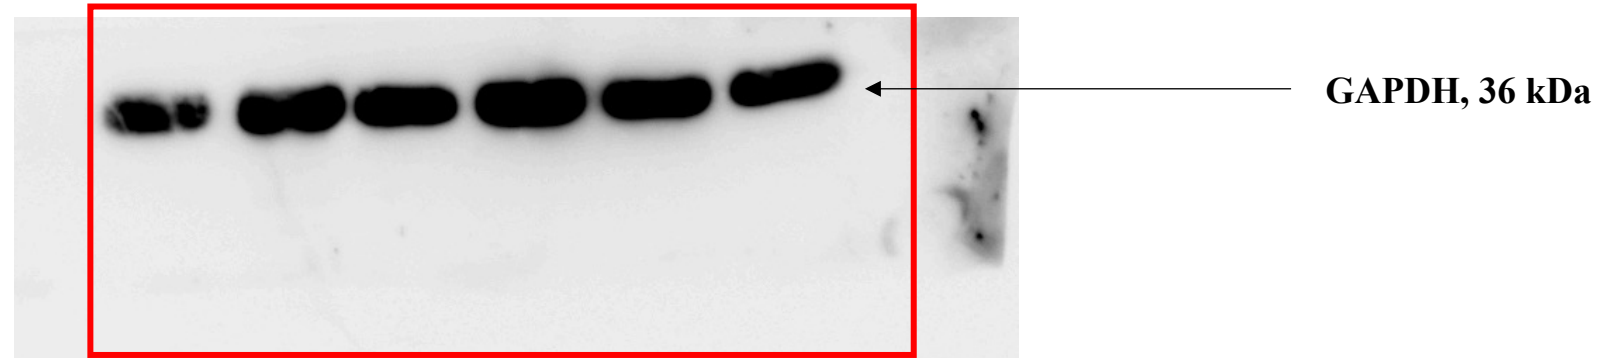

A separate gel was run with less amount of total protein for GAPDH western blot

## Supplementary Figure 15

15B

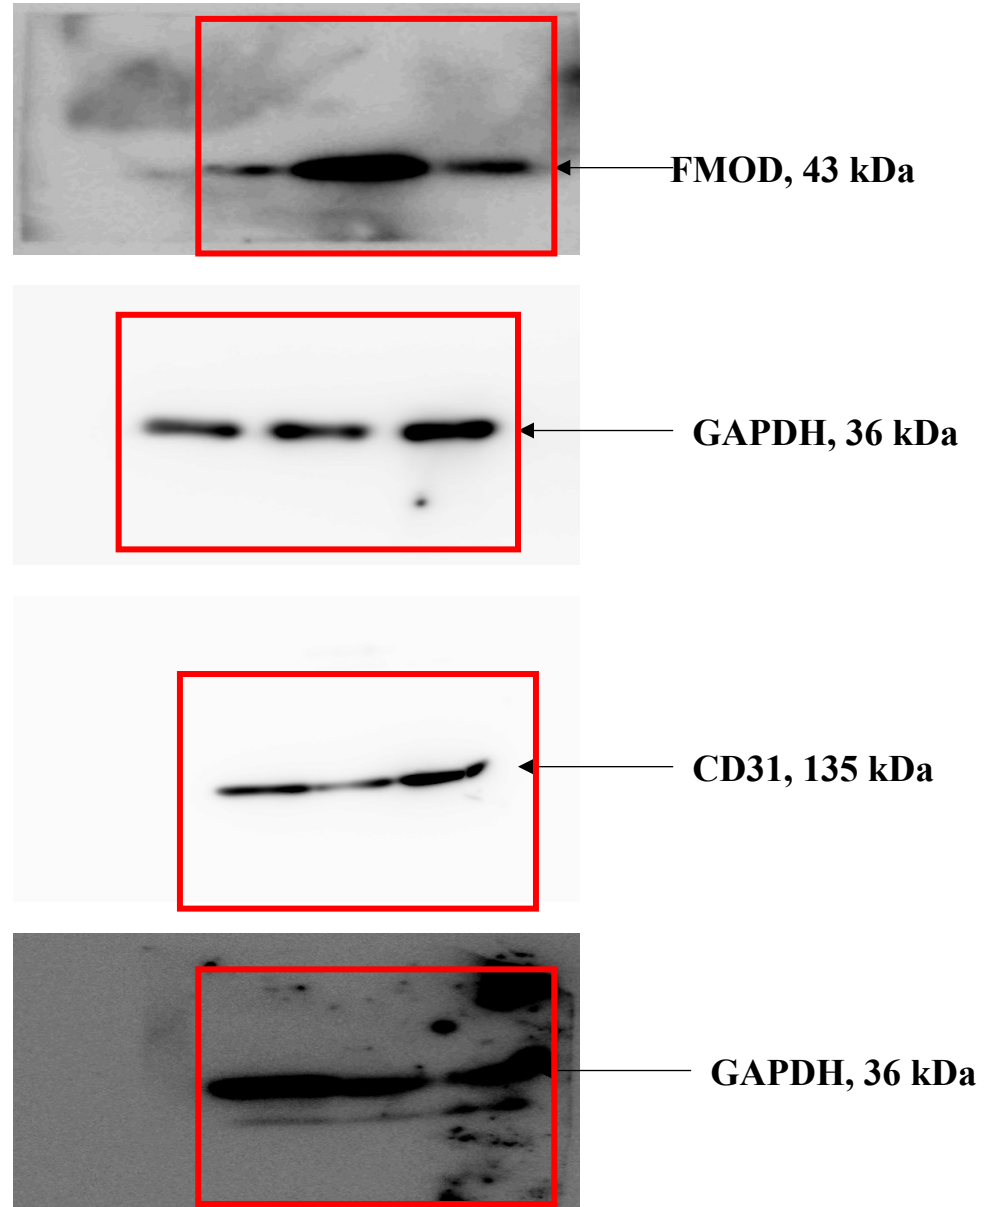

**Supplementary Figure 16**

**16 C**

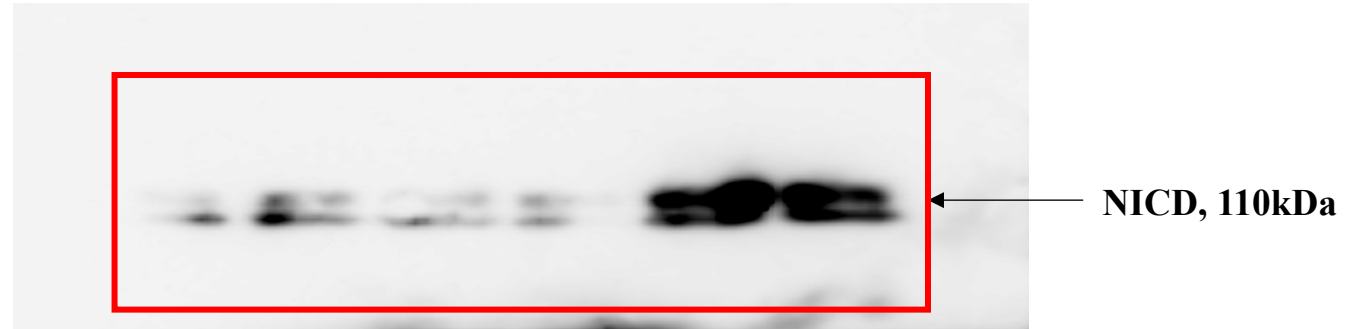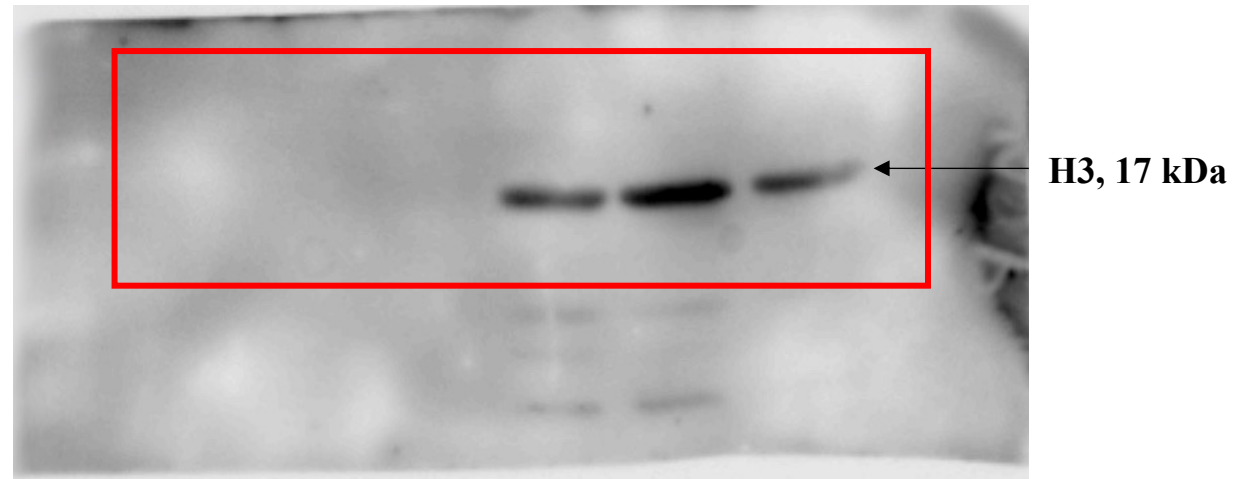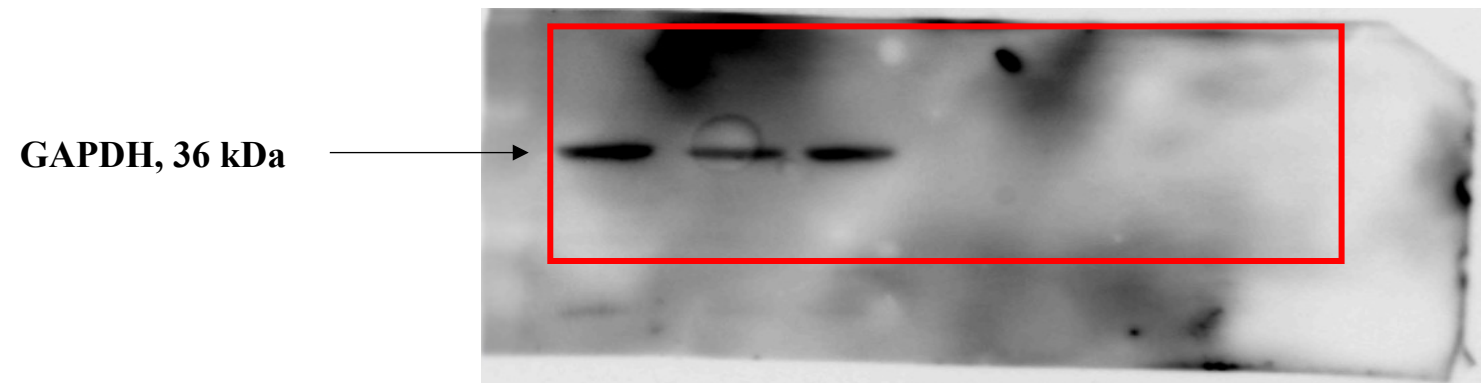



## Supplementary Figure 17

17A

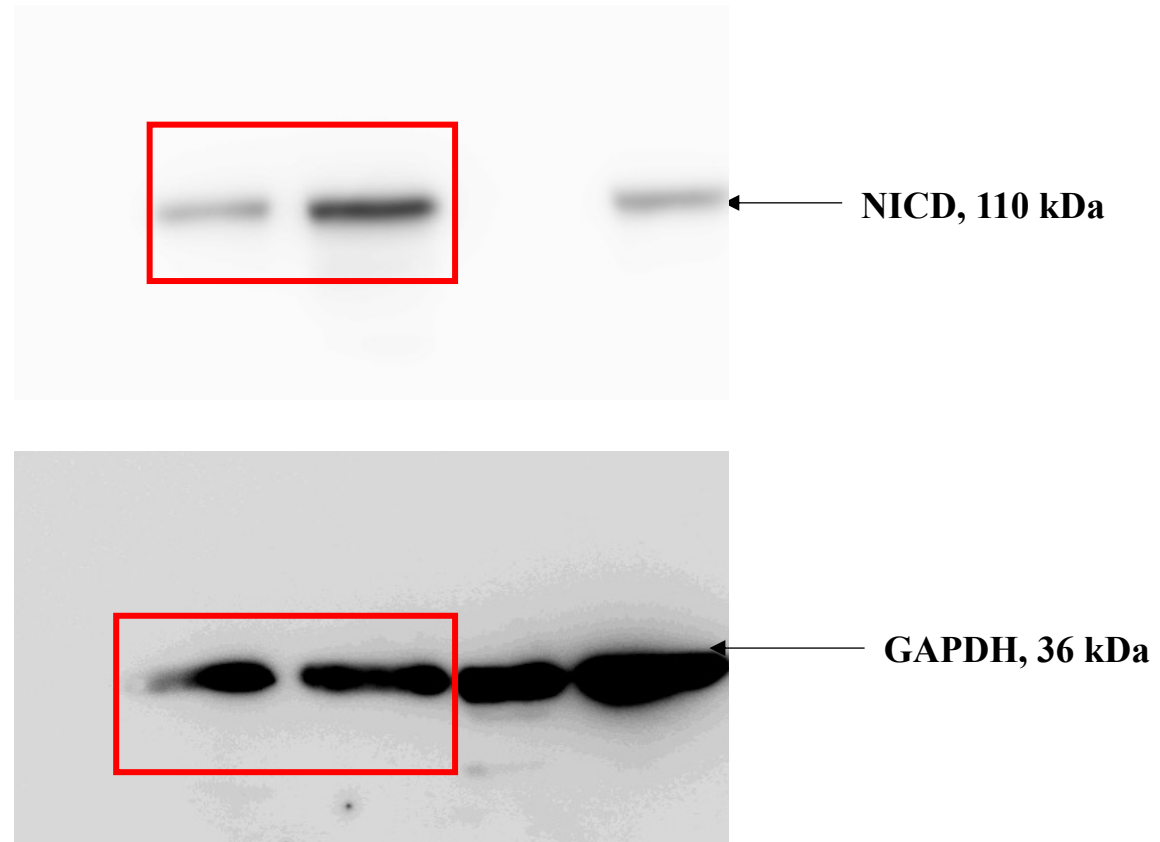

Supplementary Figure 18

18D

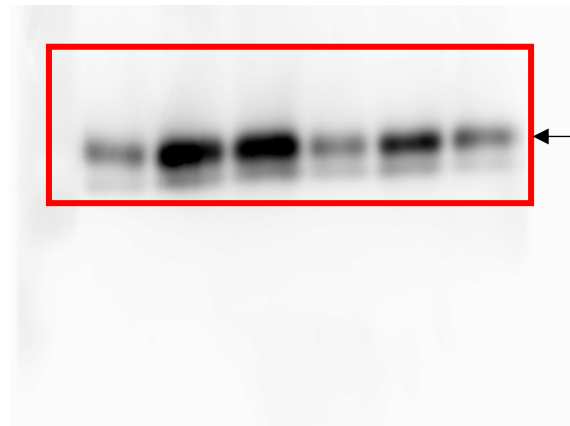

18E

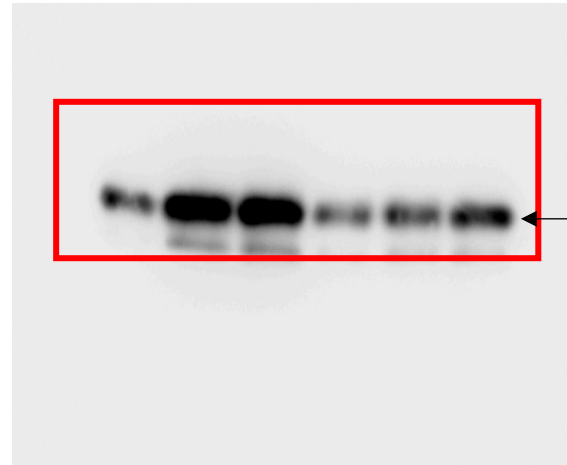

18F

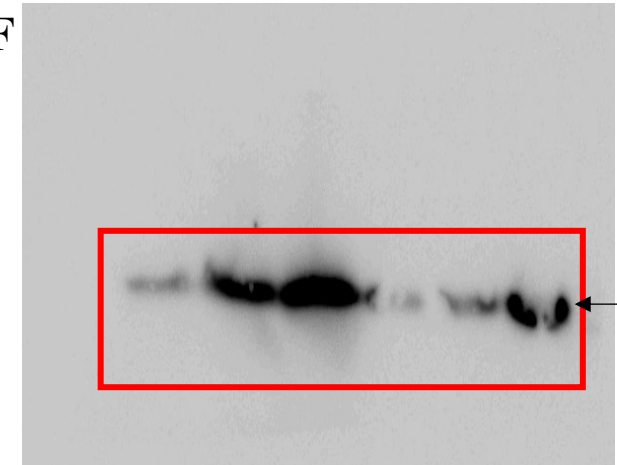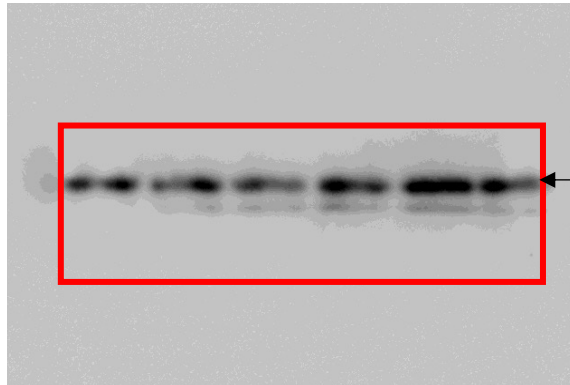

tFAK,  
125 kDa

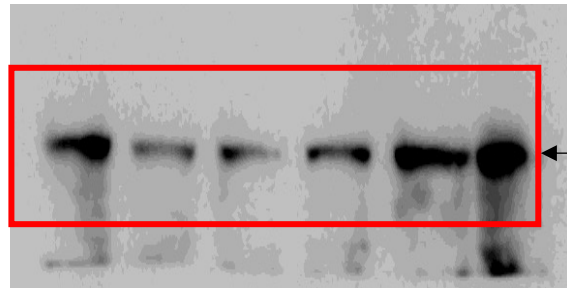

tFAK,  
125 kDa

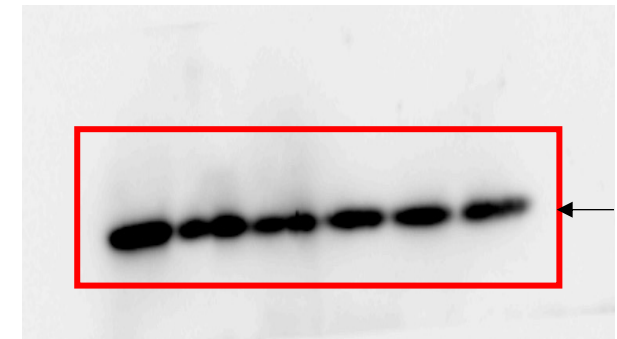

pFAK,  
125 kDa

tFAK,  
125 kDa

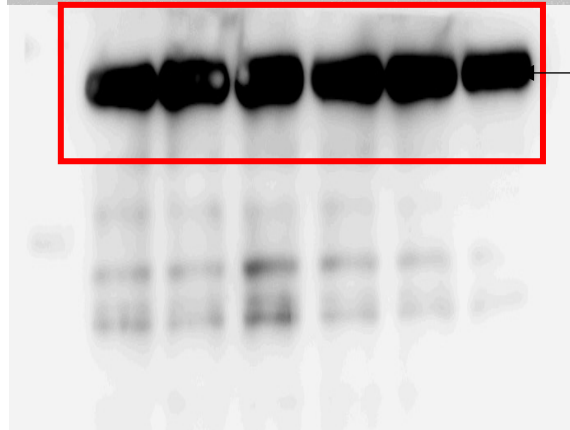

GAPDH,  
36 kDa

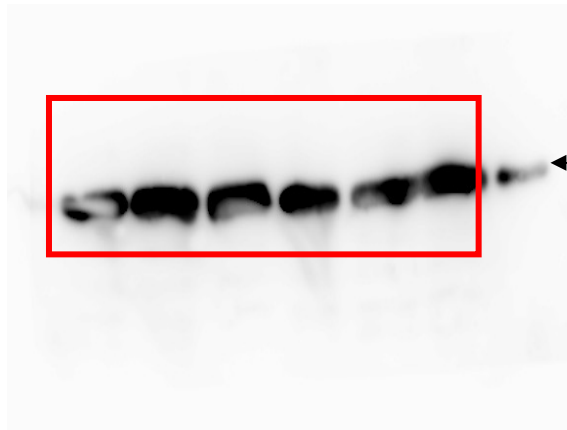

GAPDH,  
36 kDa

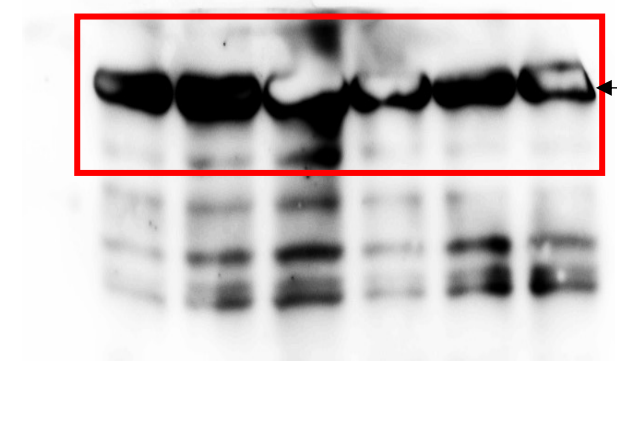

GAPDH,  
36 kDa

**Supplementary Figure 18**

**18G**

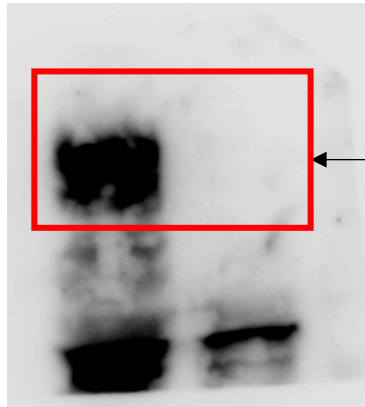

ITGB1, 115 kDa

**18H**

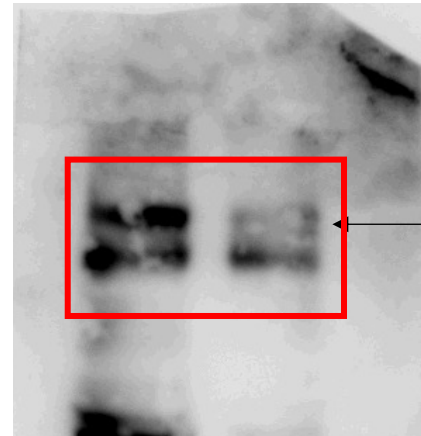

ITGAV, 135 kDa

**18I**

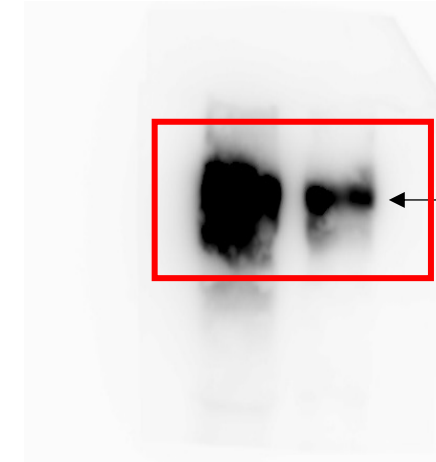

ITGA6, 127 kDa

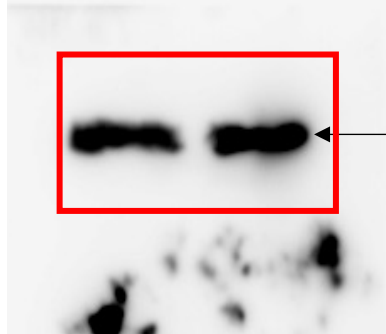

GAPDH,  
36 kDa

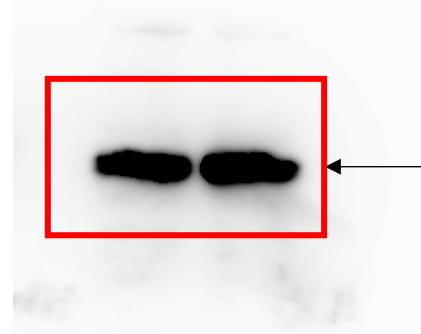

GAPDH,  
36 kDa

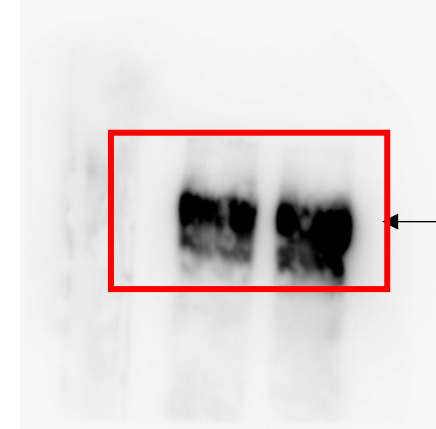

GAPDH,  
36 kDa

**Supplementary Figure 19**

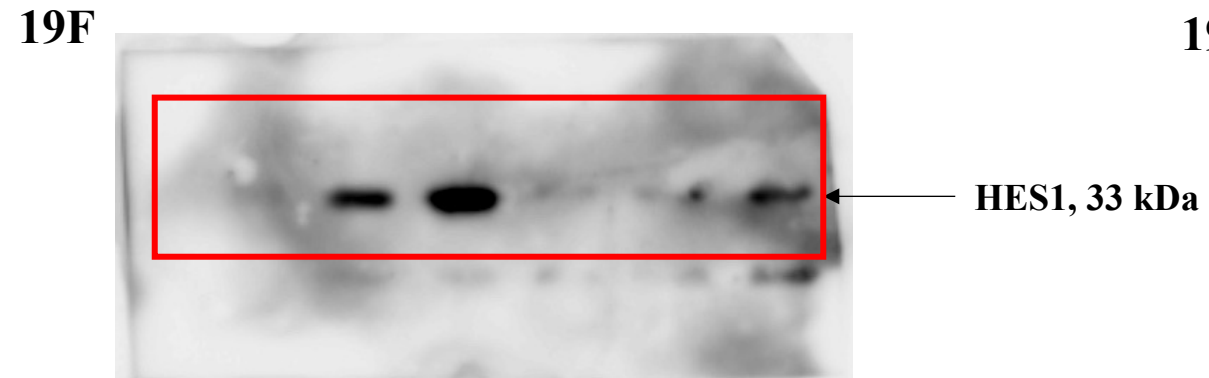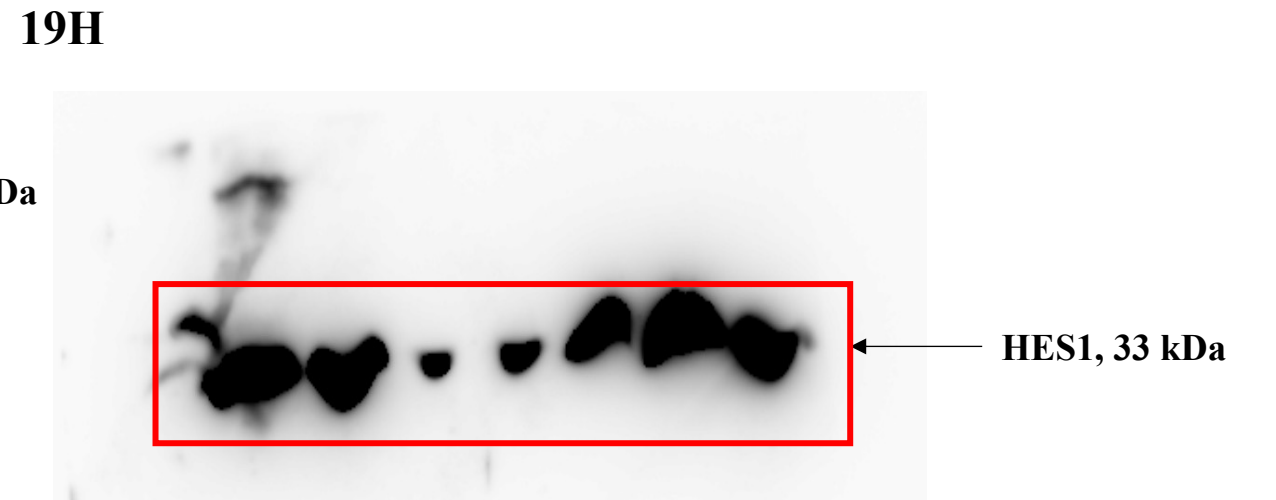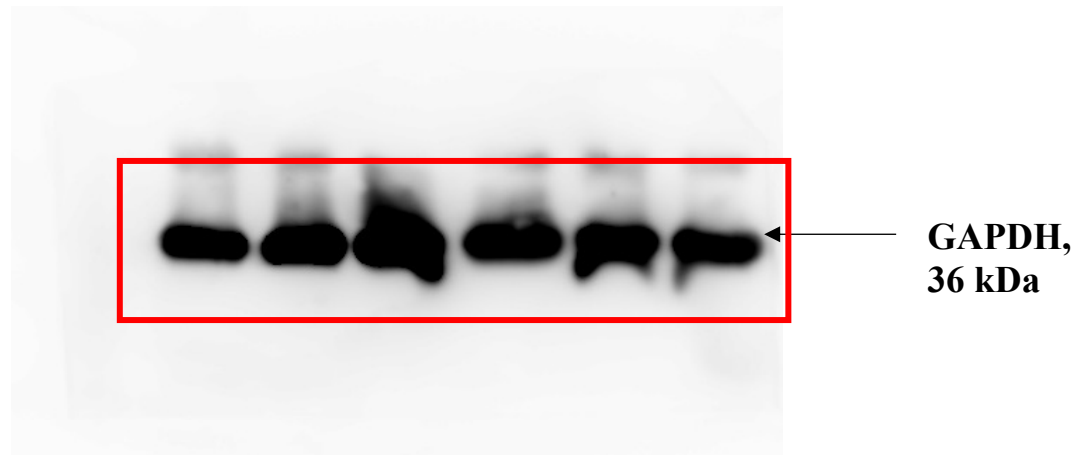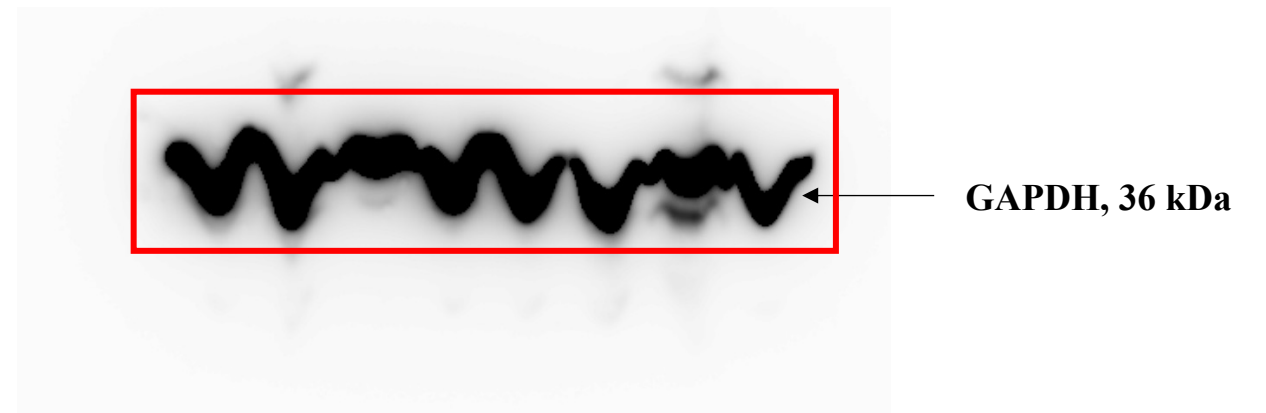

**G**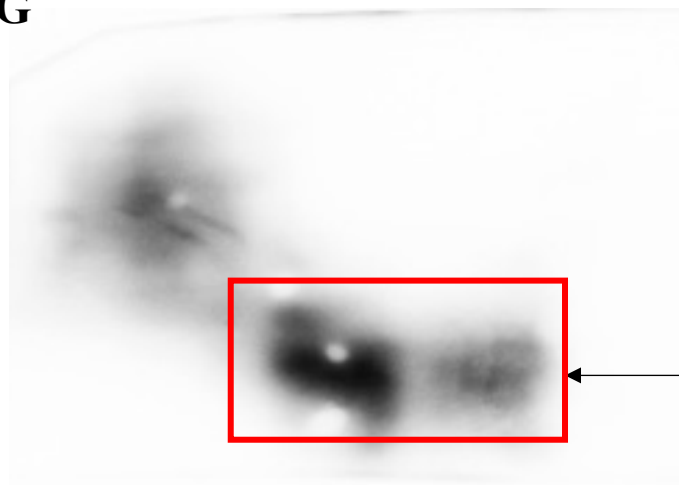**KLF8, 56 kDa**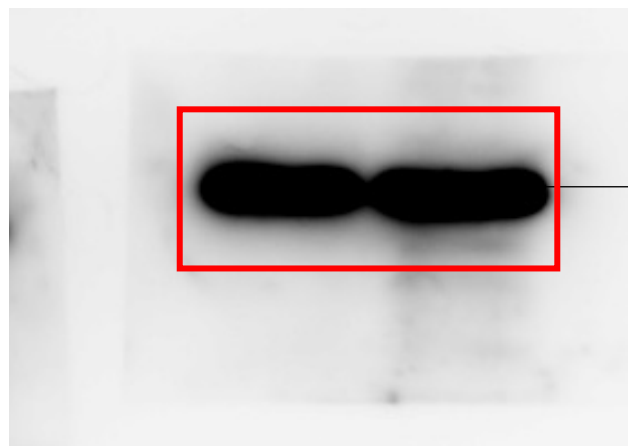**GAPDH, 36 kDa****H**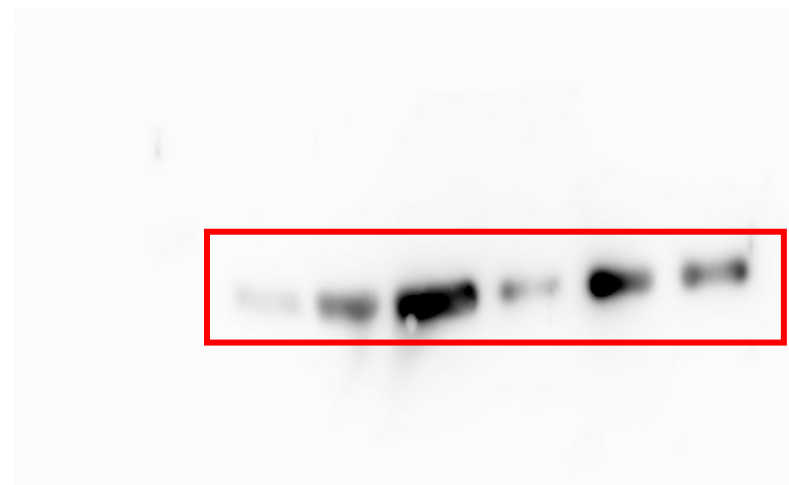**JAG1, 180 kDa**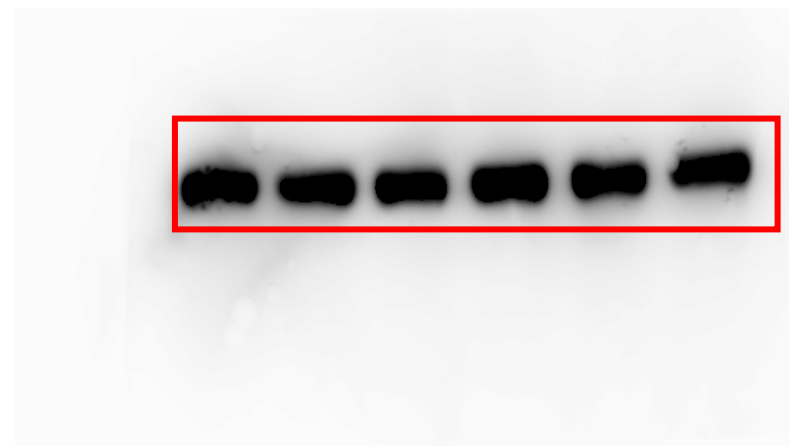**GAPDH, 36 kDa**
