# Supplementary material for: Differentiated glioma cell-derived fibromodulin activates integrin-dependent Notch signaling in endothelial cells to promote tumor angiogenesis and growth
Source: eLife journal article supplement (doi:10.7554/elife.78972), 2022-06-01
Supplement: fig4-figsupp5-data1 [file REAL TIME VALUE FOR PANEL B.xlsx]

## Sheet: Sheet1
	0	12	24
rhF	1	2.5	3
Faki+rhF	0.8	1.5	1.8
