# Supplementary material for: Differentiated glioma cell-derived fibromodulin activates integrin-dependent Notch signaling in endothelial cells to promote tumor angiogenesis and growth
Source: eLife journal article supplement (doi:10.7554/elife.78972), 2022-06-01
Supplement: fig4-figsupp5-data1 [file RT-QPCR FOR PANEL A.xlsx]

## Sheet: Sheet1
		0		12		24
	RHF	RHF+RGD	RHF	RHF+RGD	RHF	RHF+RGD
DLL3	1	1	6.1	3.2	7	4.2
DLL4	1	1.1	2	2.2	2.8	1.5
JAG1	1	1.2	4.5	2.5	6.4	1.8
JAG2	1	1.03	1.8	0.5	2.5	1.8
