# Supplementary material for: Differentiated glioma cell-derived fibromodulin activates integrin-dependent Notch signaling in endothelial cells to promote tumor angiogenesis and growth
Source: eLife journal article supplement (doi:10.7554/elife.78972), 2022-06-01
Supplement: fig4-figsupp5-data1 [file RT-QPCR FOR PANEL F.xlsx]

## Sheet: Sheet1
		KLF	FOX	ETS	GATA	ATF
RHF	0	1	1	1	1	1
	12	4.1	1.5	1.5	2	1.7
	24	4.8	1.4	1.3	1.9	1.6
RGD+RHF	12	2.8	0.8	0.9	1.7	1.2
	24	2	0.7	0.4	0.9	1
