# Supplementary material for: Differentiated glioma cell-derived fibromodulin activates integrin-dependent Notch signaling in endothelial cells to promote tumor angiogenesis and growth
Source: eLife journal article supplement (doi:10.7554/elife.78972), 2022-06-01
Supplement: fig4-figsupp6-data1 [file Correlation.xlsx]

## Sheet: Sheet1
	Sample	FMOD	HES1	JAG1	Dataset	time	status	FMOD_Median_Low_High
1	CGGA_1001	1.32	14.47		CGGA Rnaseq	112.7	0	Low
2	CGGA_1007	10.23	14.69		CGGA Rnaseq	11.3	1	High
3	CGGA_1011	5.95	9.09		CGGA Rnaseq	3.6	1	Low
4	CGGA_1015	74.49	23.33		CGGA Rnaseq	5.4	1	High
5	CGGA_1023	4.38	78.72		CGGA Rnaseq	22.4	1	Low
6	CGGA_1024	1.8	18.36		CGGA Rnaseq	101.1	1	Low
7	CGGA_1026	3.64	27.52		CGGA Rnaseq	51.6	1	Low
8	CGGA_1035	22.95	5.44		CGGA Rnaseq	18.6	1	High
9	CGGA_1039	4.55	20.95		CGGA Rnaseq	23.9	1	Low
10	CGGA_1045	8.36	26.51		CGGA Rnaseq	11.4	1	Low
11	CGGA_1049	28.61	13.07		CGGA Rnaseq	26.6	1	High
12	CGGA_1072	0.95	25.93		CGGA Rnaseq	35.8	1	Low
13	CGGA_1077	32.64	53.64		CGGA Rnaseq	19.4	1	High
14	CGGA_1083	42.41	13.94		CGGA Rnaseq	14.8	1	High
15	CGGA_1091	9.85	6.52		CGGA Rnaseq	36.7	1	Low
16	CGGA_1109	0.64	35.2		CGGA Rnaseq	44.3	1	Low
17	CGGA_1124	24.84	22.37		CGGA Rnaseq	15.9	1	High
18	CGGA_1139	3.75	15.67		CGGA Rnaseq	39.3	1	Low
19	CGGA_1171	15.31	13.79		CGGA Rnaseq	13.5	1	High
20	CGGA_1180	5.85	23.68		CGGA Rnaseq	40.3	0	Low
21	CGGA_1214	28.09	43.88		CGGA Rnaseq	19.9	1	High
22	CGGA_1216	57.54	22.55		CGGA Rnaseq	10.3	1	High
23	CGGA_1224	10.33	27.02		CGGA Rnaseq	8.9	1	High
24	CGGA_1234	8.7	9.05		CGGA Rnaseq	23.2	1	Low
25	CGGA_1237	25.18	22.75		CGGA Rnaseq	9.7	1	High
26	CGGA_1240	8.27	16.79		CGGA Rnaseq	0.6	1	Low
27	CGGA_1251	0.77	18.65		CGGA Rnaseq	8.9	1	Low
28	CGGA_1258	11.25	37.13		CGGA Rnaseq	3.7	1	High
29	CGGA_1270	2.42	20.8		CGGA Rnaseq	6.2	1	Low
30	CGGA_1299	23.64	44.73		CGGA Rnaseq	18.1	1	High
31	CGGA_1313	12.94	9.57		CGGA Rnaseq	12.5	1	High
32	CGGA_1320	0.31	101.18		CGGA Rnaseq	1.9	1	Low
33	CGGA_1332	4.79	36.67		CGGA Rnaseq	16.8	0	Low
34	CGGA_1338	21.01	16.61		CGGA Rnaseq	36.9	1	High
35	CGGA_1342	27.04	26.98		CGGA Rnaseq	6.1	1	High
36	CGGA_274	30.52	42.58		CGGA Rnaseq	20.1	0	High
37	CGGA_413	55.55	13.96		CGGA Rnaseq	6	0	High
38	CGGA_483	34.34	20.53		CGGA Rnaseq	9.1	1	High
39	CGGA_494	2.06	9.37		CGGA Rnaseq	135.1	0	Low
40	CGGA_499	3.28	10.21		CGGA Rnaseq	4	1	Low
41	CGGA_525	20.82	26.36		CGGA Rnaseq	4.5	1	High
42	CGGA_604	4	12.42		CGGA Rnaseq	12.5	1	Low
43	CGGA_658	57.51	11.29		CGGA Rnaseq	12.2	1	High
44	CGGA_676	21.08	19.32		CGGA Rnaseq	12.4	1	High
45	CGGA_679	17.27	25.69		CGGA Rnaseq	8.6	1	High
46	CGGA_680	0.91	10.52		CGGA Rnaseq	78	1	Low
47	CGGA_700	0.39	3.87		CGGA Rnaseq	5.6	0	Low
48	CGGA_731	24.36	28.05		CGGA Rnaseq	16.5	1	High
49	CGGA_782	30.18	13.54		CGGA Rnaseq	9.5	1	High
50	CGGA_789	1.62	23.78		CGGA Rnaseq	11.3	1	Low
51	CGGA_802	24.98	18.69		CGGA Rnaseq	22.4	1	High
52	CGGA_804	1.33	2.18		CGGA Rnaseq	20.2	0	Low
53	CGGA_808	0.73	6.78		CGGA Rnaseq	38.4	0	Low
54	CGGA_837	24.44	26.61		CGGA Rnaseq	14.2	1	High
55	CGGA_842	46.79	26.67		CGGA Rnaseq	6.7	1	High
56	CGGA_848	111.11	17.99		CGGA Rnaseq	7.9	0	High
57	CGGA_850	48.24	17.89		CGGA Rnaseq	18.5	0	High
58	CGGA_859	3.32	8.35		CGGA Rnaseq	12.7	1	Low
59	CGGA_876	30.26	4.53		CGGA Rnaseq	5.2	1	High
60	CGGA_878	38.43	25.99		CGGA Rnaseq	28.4	1	High
61	CGGA_902	16.94	8.81		CGGA Rnaseq	6.3	1	High
62	CGGA_D03	12.96	34.65		CGGA Rnaseq	13.9	1	High
63	CGGA_D09	11.51	13.27		CGGA Rnaseq	7.7	1	High
64	CGGA_D35	8.07	22.92		CGGA Rnaseq	21.7	1	Low
65	CGGA_D37	36.93	28.36		CGGA Rnaseq	31.7	1	High
66	CGGA_D57	9.96	13.59		CGGA Rnaseq	25.2	1	High
67	CGGA_342	2.19	10.08		CGGA Rnaseq	16.4	1	Low
68	CGGA_1219	0.66	27.06		CGGA Rnaseq	69.7	1	Low
69	CGGA_1287	0.61	5.94		CGGA Rnaseq	17.5	1	Low
70	CGGA_1314	0.7	11		CGGA Rnaseq	5.7	1	Low
71	CGGA_1384	0.58	5.46		CGGA Rnaseq	6.3	1	Low
72	CGGA_1409	1.3	20.69		CGGA Rnaseq	76.8	0	Low
73	CGGA_491	0.62	10.34		CGGA Rnaseq	35.3	1	Low
74	CGGA_710	3.45	4.64		CGGA Rnaseq	21.7	1	Low
75	CGGA_747	1.3	12.85		CGGA Rnaseq	31.9	1	Low
76	CGGA_761	0.83	4.61		CGGA Rnaseq	60.5	1	Low
77	CGGA_1008	9.67	50.61		CGGA Rnaseq	10.4	1	Low
78	CGGA_1053	4.49	33.18		CGGA Rnaseq	12.2	1	Low
79	CGGA_1070	46.08	33.68		CGGA Rnaseq	10.9	1	High
80	CGGA_1073	66.4	22.41		CGGA Rnaseq	8.9	1	High
81	CGGA_1074	25.34	23.91		CGGA Rnaseq	2.8	1	High
82	CGGA_1114	8.07	9.71		CGGA Rnaseq	15.1	1	Low
83	CGGA_1275	3.61	19.63		CGGA Rnaseq	6	1	Low
84	CGGA_759	2.04	8.75		CGGA Rnaseq	41.5	1	Low
85	CGGA_D30	11.94	21.28		CGGA Rnaseq	7.1	1	High
86	GSM405213	8.0169	6.7533	7.8047	Gravendeel	16.1	1	Low
87	GSM405214	10.0864	5.7161	5.8734	Gravendeel	18	1	High
88	GSM405215	6.5294	6.0635	7.7622	Gravendeel	27.6	1	Low
89	GSM405216	5.8571	5.8428	5.0621	Gravendeel	39.4	1	Low
90	GSM405217	7.1431	5.268	6.1083	Gravendeel	81.2	0	Low
91	GSM405218	9.0733	6.6034	7.3087	Gravendeel	7.7	1	High
92	GSM405219	8.0059	6.3567	6.9428	Gravendeel	7	1	Low
93	GSM405220	7.282	5.6267	8.3273	Gravendeel	15.2	1	Low
94	GSM405221	8.1268	7.074	7.7543	Gravendeel	8.3	1	Low
95	GSM405222	6.7875	5.1158	6.1688	Gravendeel	15.6	1	Low
96	GSM405223	9.5188	6.6724	6.1598	Gravendeel	23	1	High
97	GSM405224	7.4355	6.2306	5.5787	Gravendeel	5.8	1	Low
98	GSM405228	9.1315	5.885	6.2745	Gravendeel	8.5	1	High
99	GSM405229	7.7163	6.4239	6.162	Gravendeel	7.9	1	Low
100	GSM405230	9.1336	6.5916	7.3554	Gravendeel	5.6	1	High
101	GSM405231	7.0237	7.3365	7.1969	Gravendeel	15.1	1	Low
102	GSM405232	8.1814	4.4459	7.5669	Gravendeel	11.8	1	High
103	GSM405233	7.9803	6.2423	7.6983	Gravendeel	10.3	1	Low
104	GSM405234	7.0979	5.4286	7.438	Gravendeel	7.4	1	Low
105	GSM405235	8.6836	5.3747	7.2576	Gravendeel	2.5	1	High
106	GSM405236	9.0504	6.655	6.6071	Gravendeel	12.4	1	High
107	GSM405237	5.7756	6.3117	6.9396	Gravendeel	4.9	1	Low
108	GSM405238	6.1827	5.3401	5.3832	Gravendeel	11.3	1	Low
109	GSM405239	7.7621	7.2039	8.0207	Gravendeel	7.1	1	Low
110	GSM405240	7.0315	6.362	6.4944	Gravendeel	79.4	0	Low
111	GSM405241	7.375	6.7979	6.569	Gravendeel	1.9	1	Low
112	GSM405242	5.4426	5.4233	7.5526	Gravendeel	2.2	1	Low
113	GSM405243	8.1422	5.7463	5.8193	Gravendeel	10.6	1	High
114	GSM405244	6.6921	5.364	6.6951	Gravendeel	24.6	1	Low
115	GSM405245	7.2506	4.603	7.2237	Gravendeel	16.8	1	Low
116	GSM405246	5.9764	4.4418	5.3765	Gravendeel	75.7	1	Low
117	GSM405247	7.1713	8.2092	7.0896	Gravendeel	19.1	1	Low
118	GSM405248	8.8839	6.0687	6.2877	Gravendeel	10.1	1	High
119	GSM405249	5.8402	5.1557	5.6351	Gravendeel	0.5	1	Low
120	GSM405251	6.2421	5.8192	5.2283	Gravendeel	38.5	1	Low
121	GSM405252	7.544	6.8977	5.8693	Gravendeel	4.4	1	Low
122	GSM405253	6.7649	6.7563	7.6334	Gravendeel	150.7	0	Low
123	GSM405254	6.3835	6.5654	7.571	Gravendeel	7.1	1	Low
124	GSM405255	8.6936	6.0599	6.5868	Gravendeel	13	1	High
125	GSM405260	9.249	7.0303	7.0891	Gravendeel	9.8	1	High
126	GSM405262	7.6371	7.3348	6.9631	Gravendeel	34.7	1	Low
127	GSM405263	7.9543	6.8036	7.09	Gravendeel	18.6	1	Low
128	GSM405264	8.5543	5.8264	7.0789	Gravendeel	3.8	1	High
129	GSM405266	8.9602	7.9541	7.4399	Gravendeel	3	1	High
130	GSM405267	9.0921	7.6111	8.1682	Gravendeel	7.8	1	High
131	GSM405268	7.0509	5.8023	6.8597	Gravendeel	7.7	1	Low
132	GSM405269	8.7372	6.1348	6.4231	Gravendeel	0.4	1	High
133	GSM405270	8.9165	6.8256	6.9593	Gravendeel	7	1	High
134	GSM405271	8.2013	6.2432	5.5232	Gravendeel	3.6	1	High
135	GSM405274	7.7384	6.5778	7.9165	Gravendeel	15.5	1	Low
136	GSM405275	5.9756	5.2479	5.9252	Gravendeel	41.5	1	Low
137	GSM405276	9.259	5.9158	6.7409	Gravendeel	3.4	1	High
138	GSM405278	7.9987	5.3775	5.5337	Gravendeel	8.8	1	Low
139	GSM405280	6.7527	7.3443	7.2691	Gravendeel	29.5	1	Low
140	GSM405282	9.1087	6.6719	8.018	Gravendeel	1.4	1	High
141	GSM405290	9.044	7.4201	7.0742	Gravendeel	13.9	1	High
142	GSM405292	6.2273	6.5891	8.3962	Gravendeel	13.3	1	Low
143	GSM405293	8.0012	7.0966	7.0231	Gravendeel	10.6	1	Low
144	GSM405294	6.7022	6.5039	8.7329	Gravendeel	9.6	1	Low
145	GSM405296	8.5193	5.3238	5.9145	Gravendeel	3.5	1	High
146	GSM405297	8.5269	6.4169	5.8208	Gravendeel	8.6	1	High
147	GSM405299	7.3289	7.7513	8.3851	Gravendeel	21	1	Low
148	GSM405301	9.2945	7.0584	7.1945	Gravendeel	3.6	1	High
149	GSM405302	7.3359	6.7775	7.5053	Gravendeel	8.9	1	Low
150	GSM405303	8.5517	7.2062	7.285	Gravendeel	6.6	1	High
151	GSM405304	7.4279	6.8001	7.3285	Gravendeel	6.7	1	Low
152	GSM405305	10.1393	6.7842	6.4073	Gravendeel	12.7	1	High
153	GSM405307	9.1762	7.3505	5.9873	Gravendeel	4	1	High
154	GSM405308	6.1593	5.8823	7.6117	Gravendeel	37.2	0	Low
155	GSM405309	6.9957	5.9399	5.9031	Gravendeel	3.1	1	Low
156	GSM405312	8.7158	7.6858	8.8695	Gravendeel	12.2	1	High
157	GSM405313	6.5727	5.8413	7.1972	Gravendeel	39.7	1	Low
158	GSM405314	8.4763	6.4866	6.4898	Gravendeel	7.8	1	High
159	GSM405315	6.691	5.5287	5.229	Gravendeel	4.2	1	Low
160	GSM405317	8.88	6.3901	6.8532	Gravendeel	5.4	1	High
161	GSM405320	9.4116	6.5155	5.9525	Gravendeel	7.2	1	High
162	GSM405322	9.631	6.7868	8.6576	Gravendeel	13.7	1	High
163	GSM405323	12.1807	6.8504	7.9003	Gravendeel	7.4	1	High
164	GSM405324	10.7081	6.8476	6.7726	Gravendeel	8	1	High
165	GSM405326	9.2808	7.3342	7.7567	Gravendeel	3.2	1	High
166	GSM405328	9.3267	7.637	7.2242	Gravendeel	27.1	1	High
167	GSM405330	5.7975	5.4374	7.7629	Gravendeel	8.5	1	Low
168	GSM405337	7.5014	7.3848	8.5691	Gravendeel	3.4	1	Low
169	GSM405339	9.8507	7.0542	7.1979	Gravendeel		0	High
170	GSM405340	6.4318	5.9964	6.115	Gravendeel	66.7	0	Low
171	GSM405343	7.5033	7.0701	6.1384	Gravendeel		0	Low
172	GSM405345	7.5915	6.8907	7.6871	Gravendeel	10.7	1	Low
173	GSM405349	7.8503	7.243	9.8947	Gravendeel	28.9	1	Low
174	GSM405350	7.1211	5.6543	6.4068	Gravendeel	7.3	1	Low
175	GSM405351	9.1356	6.5752	8.8996	Gravendeel	14.6	1	High
176	GSM405352	6.1874	8.6393	8.1617	Gravendeel	4.8	1	Low
177	GSM405353	9.2145	7.1549	7.2376	Gravendeel	8.4	1	High
178	GSM405356	6.5154	5.3207	5.6956	Gravendeel	2.2	1	Low
179	GSM405362	8.772	7.1604	7.8039	Gravendeel	12.7	1	High
180	GSM405363	5.4522	6.6998	7.7343	Gravendeel	117.5	1	Low
181	GSM405365	6.7402	6.526	6.9294	Gravendeel	31.9	1	Low
182	GSM405367	6.6991	6.2985	7.1566	Gravendeel	31.4	1	Low
183	GSM405368	6.2926	7.0442	7.1104	Gravendeel	21.7	1	Low
184	GSM405369	5.5687	5.1522	6.2807	Gravendeel	49.6	1	Low
185	GSM405370	7.3498	5.9833	7.3549	Gravendeel	19.3	1	Low
186	GSM405371	9.4977	7.0715	6.5777	Gravendeel	23	1	High
187	GSM405372	6.372	6.4351	7.3383	Gravendeel	39.8	1	Low
188	GSM405373	9.6773	6.702	8.0351	Gravendeel	14.5	1	High
189	GSM405374	9.6683	6.5651	7.9008	Gravendeel	14.5	1	High
190	GSM405375	8.7856	9.0445	7.1837	Gravendeel	0.7	1	High
191	GSM405376	8.4748	7.7762	7.363	Gravendeel	22.2	1	High
192	GSM405379	8.2114	6.5533	6.4615	Gravendeel	0.6	1	High
193	GSM405384	7.7591	7.8874	9.3372	Gravendeel	0.2	0	Low
194	GSM405385	6.4977	5.9923	6.5319	Gravendeel	15.1	0	Low
195	GSM405389	9.5187	9.8123	5.555	Gravendeel	66.7	0	High
196	GSM405391	7.7083	7.664	8.5355	Gravendeel	12.6	1	Low
197	GSM405392	8.252	7.9888	8.166	Gravendeel	5.6	1	High
198	GSM405393	9.8159	8.0335	7.1441	Gravendeel	1	1	High
199	GSM405396	8.3943	7.8383	9.1884	Gravendeel	0.2	1	High
200	GSM405397	8.8824	6.5253	7.4421	Gravendeel	4.2	1	High
201	GSM405398	9.2177	7.9768	8.3266	Gravendeel		1	High
202	GSM405405	8.2048	7.8946	8.9976	Gravendeel	7.3	1	High
203	GSM405412	9.9052	8.465	7.8319	Gravendeel	7.8	1	High
204	GSM405415	9.6301	7.769	7.4022	Gravendeel	6	1	High
205	GSM405416	8.9646	6.8694	6.8048	Gravendeel	4.1	1	High
206	GSM405417	7.0914	7.7027	8.3862	Gravendeel	0.2	1	Low
207	GSM405418	6.0906	7.5179	7.1841	Gravendeel	62	1	Low
208	GSM405419	5.899	6.8924	7.9952	Gravendeel	35.2	1	Low
209	GSM405422	6.164	7.3082	9.0569	Gravendeel	10.9	1	Low
210	GSM405426	8.2634	9.2165	6.4533	Gravendeel	0.6	1	High
211	GSM405427	9.4124	8.4033	8.7666	Gravendeel	18.4	1	High
212	GSM405428	8.1212	8.6249	8.3062	Gravendeel	9.5	1	Low
213	GSM405430	9.6882	7.4876	7.6799	Gravendeel	4.2	1	High
214	GSM405431	8.5983	8.439	8.2615	Gravendeel	11	1	High
215	GSM405432	7.2357	8.1819	8.1473	Gravendeel	6.6	1	Low
216	GSM405434	9.2942	7.4756	9.762	Gravendeel	2.9	1	High
217	GSM405436	8.5856	7.8532	6.5934	Gravendeel	5.8	1	High
218	GSM405438	10.1337	8.4718	7.8854	Gravendeel	27.6	1	High
219	GSM405440	9.7559	8.1944	7.6998	Gravendeel	6.4	1	High
220	GSM405442	9.6451	7.8985	7.5427	Gravendeel	3.6	1	High
221	GSM405443	7.0716	8.713	7.1896	Gravendeel	11.8	1	Low
222	GSM405446	7.1858	7.9471	7.4006	Gravendeel	8.8	1	Low
223	GSM405447	10.0715	7.6111	6.9247	Gravendeel	33.5	1	High
224	GSM405448	9.348	6.6354	6.6239	Gravendeel	5.8	1	High
225	GSM405452	9.1682	6.4692	6.0282	Gravendeel	4.2	1	High
226	GSM405453	8.0524	8.4782	7.0815	Gravendeel	2.5	1	Low
227	GSM405454	9.584	7.0865	7.9167	Gravendeel	39.8	1	High
228	GSM405455	9.0634	8.4039	7.0191	Gravendeel	2.8	1	High
229	GSM405456	10.0553	7.9781	7.0829	Gravendeel		0	High
230	GSM405458	7.825	8.6274	8.0937	Gravendeel	19	1	Low
231	GSM405459	8.8497	7.7409	7.1246	Gravendeel	13.7	1	High
232	GSM405461	6.9762	6.1881	6.2906	Gravendeel	9.1	1	Low
233	GSM405463	9.7116	7.4537	6.5279	Gravendeel	26.6	1	High
234	GSM405464	6.5328	7.2962	6.6265	Gravendeel	6.7	1	Low
235	GSM405465	6.4578	8.2678	7.398	Gravendeel	7.6	1	Low
236	GSM405466	10.1109	8.2984	8.5167	Gravendeel	3.4	1	High
237	GSM405470	6.302	6.3767	6.7911	Gravendeel	23	1	Low
238	GSM405471	10.4896	7.7596	7.1709	Gravendeel	1.8	1	High
239	GSM405472	8.2366	6.3782	5.5475	Gravendeel	4.1	1	High
240	GSM405473	8.0965	7.459	7.3374	Gravendeel	13.4	1	Low
241	GSM405474	9.2386	7.7127	7.1043	Gravendeel	3.5	1	High
242	GSM405475	5.5436	8.3476	7.9523	Gravendeel	12.6	1	Low
243	GSM405477	8.4687	6.8712	6.2566	Gravendeel	1.3	1	High
244	GSM405479	9.8268	7.6835	8.3583	Gravendeel	4.6	1	High
245	GBM_0092987	7.8909	7.114	9.1267	LeeY	22.7	1	High
246	GBM_00AX	6.5307	6.3641	6.1729	LeeY	20.4	1	Low
247	GBM_00BP	7.6337	6.9749	7.4866	LeeY	7.3	1	High
248	GBM_00BR	8.4715	7.4103	8.2468	LeeY	6.9	1	High
249	GBM_00BU	12.024	8.451	8.7211	LeeY	0.3	1	High
250	GBM_00DJR	6.2729	6.2062	7.5689	LeeY	19.7	1	Low
251	GBM_00DT	6.5901	6.8386	8.1894	LeeY	18.4	1	Low
252	GBM_00EJ	7.0081	7.2912	10.3685	LeeY	11.8	1	Low
253	GBM_00EM	8.2693	6.8579	8.5506	LeeY	11.8	1	High
254	GBM_00EX	7.9095	6.4854	9.1681	LeeY	10.3	1	High
255	GBM_00FM	7.1272	6.3662	9.65	LeeY	20.4	1	Low
256	GBM_00IA	9.2548	7.9313	9.1212	LeeY	10.6	1	High
257	GBM_00ICR	6.2232	5.7161	7.3354	LeeY	23.9	1	Low
258	GBM_00IM	7.4049	7.1341	8.2087	LeeY	3.9	1	Low
259	GBM_00IN	7.1472	6.5148	7.7892	LeeY	4.6	1	Low
260	GBM_00IW	8.1072	7.3206	8.3053	LeeY	4.7	1	High
261	GBM_00JS	9.1427	7.1469	9.1573	LeeY	2.6	1	High
262	GBM_00KE	8.4901	7.0258	7.9107	LeeY	13.4	1	High
263	GBM_00KN	7.754	7.8679	9.929	LeeY	10.1	1	High
264	GBM_00KY	8.0381	6.7801	8.2925	LeeY	19.3	1	High
265	GBM_00LK	7.9539	7.7322	6.5599	LeeY	9.7	1	High
266	GBM_00LO	8.6117	7.4573	8.1268	LeeY	1.2	1	High
267	GBM_00ME	7.2197	7.255	8.2883	LeeY	54	1	Low
268	GBM_00MF	8.7376	6.8585	8.4376	LeeY	16.2	1	High
269	GBM_00MN	8.055	6.1997	7.6962	LeeY	6	1	High
270	GBM_00MO	6.6492	6.7076	8.6906	LeeY	16.6	1	Low
271	GBM_00MW	8.1164	6.2783	8.1044	LeeY	3.1	1	High
272	GBM_00PA	7.0848	6.3893	6.6146	LeeY	11.9	1	Low
273	GBM_00QP	7.1897	6.1389	6.0859	LeeY	20.4	1	Low
274	GBM_00TIR	8.3603	6.6898	7.4055	LeeY	12	1	High
275	GBM_00XP	7.2771	6.0754	7.0587	LeeY	6.3	1	Low
276	GBM_1022	6.9733	5.8133	8.2485	LeeY	4.1	1	Low
277	GBM_1032	7.6966	6.0709	6.3827	LeeY	3	1	High
278	GBM_1038	6.7977	5.9771	6.9311	LeeY	78.5	0	Low
279	GBM_1039	6.8538	6.3628	9.0307	LeeY	36.5	1	Low
280	GBM_1043	6.9813	6.7549	9.0677	LeeY	35.8	1	Low
281	GBM_1342	7.1492	6.2952	7.3457	LeeY	7.4	1	Low
282	GBM_1354	7.3395	6.8971	7.6811	LeeY	10.3	1	Low
283	GBM_1388	7.0738	6.4492	6.6221	LeeY	13.6	1	Low
284	GBM_1398	7.4626	6.9772	7.6214	LeeY	9.6	1	High
285	GBM_1414	7.7624	8.0796	6.3891	LeeY	2.1	1	High
286	GBM_1423	6.8698	6.128	6.455	LeeY	3.2	1	Low
287	GBM_1463	7.2591	6.4737	6.9773	LeeY	8.7	1	Low
288	GBM_1469	8.1148	6.0686	7.2173	LeeY	5	1	High
289	GBM_1478	7.0476	7.5442	6.9988	LeeY	73.2	0	Low
290	GBM_1481	7.2009	6.486	7.0824	LeeY	73.1	0	Low
291	GBM_1489	7.1053	6.6888	6.2704	LeeY	11.1	1	Low
292	GBM_1495	6.7307	6.2649	7.3353	LeeY	2.3	1	Low
293	GBM_1507	9.5051	8.5818	8.6388	LeeY	11.8	1	High
294	GBM_1516	10.0312	7.3028	8.9821	LeeY	71.4	0	High
295	GBM_1656	6.518	6.1923	5.777	LeeY	69.1	0	Low
296	GBM_1659	7.903	8.7442	7.4376	LeeY	4	1	High
297	GBM_1667	7.2947	7.3624	7.9356	LeeY	19.3	1	Low
298	GBM_1671	6.86	6.0974	6.9797	LeeY	20.4	1	Low
299	GBM_1675	6.8637	6.8731	8.9486	LeeY	22.5	1	Low
300	GBM_1696	7.4255	7.129	6.9556	LeeY	5.7	1	Low
301	GBM_1725	7.1122	6.8527	7.7977	LeeY	6.9	1	Low
302	GBM_1735	8.53	6.9019	7.4133	LeeY	2.4	1	High
303	GBM_1745	6.8125	6.1467	8.2659	LeeY	25.6	1	Low
304	GBM_1782	7.4999	6.7915	7.2074	LeeY	6	1	High
305	GBM_1796	7.3207	6.7985	7.5147	LeeY	6.7	1	Low
306	GBM_1798	8.0382	6.6436	8.4787	LeeY	28.6	1	High
307	GBM_1817	7.2621	6.3677	7.4069	LeeY	25.1	1	Low
308	GBM_1823	7.9075	7.2298	7.5091	LeeY	19.6	1	High
309	GBM_1825	6.6849	7.3566	9.0885	LeeY	14.7	1	Low
310	GBM_1900	7.5763	7.0828	6.0771	LeeY	9.2	1	High
311	GBM_1902	8.0993	7.1004	8.481	LeeY	10.7	1	High
312	GBM_1905	7.8162	7.1595	6.9742	LeeY	12.8	1	High
313	GBM_2013	8.2252	7.3042	7.652	LeeY	20.5	1	High
314	GBM_2015	7.3703	7.289	7.4994	LeeY	21.8	1	Low
315	GBM_2017	8.0386	6.9065	7.6148	LeeY	7.8	1	High
316	GBM_2029	6.8205	6.4186	7.471	LeeY	26.7	1	Low
317	GBM_2036	8.7374	7.1284	8.509	LeeY	48.4	0	High
318	GBM_2079	8.8784	7.7344	9.2242	LeeY	23.7	0	High
319	GBM_2098	7.5125	7.2524	9.0518	LeeY	6.7	1	High
320	GBM_2117	7.1105	7.5475	7.2397	LeeY	7.2	1	Low
321	GBM_2149	9.3189	7.119	8.4375	LeeY	11	1	High
322	GBM_2158	7.0034	6.7557	7.6078	LeeY	3.1	1	Low
323	GBM_2166	6.7766	6.5332	7.4716	LeeY	36.1	1	Low
324	GBM_2371	8.3866	6.9002	7.9679	LeeY	41.1	0	High
325	GBM_2434	6.1242	7.6316	6.6797	LeeY	8.6	1	Low
326	GBM_2456	7.7327	6.6389	6.7251	LeeY	12.4	1	High
327	GBM_2819	8.7596	6.8595	6.7321	LeeY	13.3	1	High
328	GBM_585	7.0977	6.7528	6.7847	LeeY	9.8	1	Low
329	GBM_597	8.3906	6.6106	7.2785	LeeY	0.2	1	High
330	GBM_604	7.9625	7.2764	8.3261	LeeY	6.1	1	High
331	GBM_608	8.0693	7.3428	7.4753	LeeY	12.5	1	High
332	GBM_628	7.3637	6.4855	6.2261	LeeY	5	1	Low
333	GBM_658	8.6339	6.7554	6.7817	LeeY	110.2	0	High
334	GBM_660	6.8297	6.6667	6.9397	LeeY	3.5	1	Low
335	GBM_673	8.3907	6.7188	7.277	LeeY	18.2	1	High
336	GBM_681	7.2996	6.9669	7.2694	LeeY	1.6	1	Low
337	GBM_697	7.2233	6.6124	8.25	LeeY	11.7	1	Low
338	GBM_706	7.4466	6.173	5.9612	LeeY	16.6	1	Low
339	GBM_712	8.3792	7.0693	8.9663	LeeY	6.2	1	High
340	GBM_746	7.1711	6.3832	6.4745	LeeY	1.4	1	Low
341	GBM_749	8.4658	6.7033	7.4144	LeeY	1.7	1	High
342	GBM_751	7.3588	6.6165	7.0545	LeeY	39.9	1	Low
343	GBM_824	7.6949	6.3741	7.3429	LeeY	6.8	1	High
344	GBM_839	7.3936	6.3583	6.001	LeeY	9.4	1	Low
345	GBM_931	8.2765	6.7206	8.688	LeeY	6	1	High
346	GBM_932	6.7144	6.3825	7.4227	LeeY	3.2	1	Low
347	GBM_938	6.8362	6.2353	6.9495	LeeY	98.4	1	Low
348	GBM_976	7.3606	6.1379	7.8086	LeeY	13.7	1	Low
349	GBM_995	6.7364	7.0166	8.022	LeeY	1.8	1	Low
350	MDA_UCSF_3744	7.5725	7.4569	6.6403	LeeY	30.1	1	High
351	MDA_UCSF_3745	7.4353	7.8086	8.2053	LeeY	54.3	1	Low
352	MDA_UCSF_3746	7.2727	7.4473	7.7716	LeeY	72	1	Low
353	MDA_UCSF_3747	6.6723	6.1662	7.078	LeeY	48.3	1	Low
354	MDA_UCSF_3748	6.8881	6.9166	9.4415	LeeY	16.1	1	Low
355	MDA_UCSF_3749	7.3418	7.7659	8.0904	LeeY	7.8	1	Low
356	MDA_UCSF_3753	9.1291	7.3355	8.5705	LeeY	41.7	1	High
357	MDA_UCSF_3754	7.3723	7.5882	8.5088	LeeY	54.8	1	Low
358	MDA_UCSF_3756	7.9249	7.4471	7.2561	LeeY	71.6	1	High
359	MDA_UCSF_3757	7.0802	6.9546	7.1353	LeeY	14.3	1	Low
360	MDA_UCSF_3758	7.0628	6.3519	6.8609	LeeY	46.7	1	Low
361	MDA_UCSF_3759	8.141	7.1312	7.5011	LeeY	13.6	1	High
362	MDA_UCSF_3774	7.2919	7.0957	7.457	LeeY	22.3	1	Low
363	MDA_UCSF_3775	7.5562	7.0841	8.5416	LeeY	7.6	1	High
364	MDA_UCSF_3776	7.0286	7.6106	8.7673	LeeY	7.4	1	Low
365	MDA_UCSF_3778	7.4786	8.2394	8.8098	LeeY	12.7	1	High
366	MDA_UCSF_3779	7.6261	6.9562	8.8653	LeeY	13.6	1	High
367	MDA_UCSF_3781	6.546	6.8831	8.0267	LeeY	48.3	0	Low
368	MDA_UCSF_3782	7.8525	8.4902	7.8612	LeeY	12	1	High
369	MDA_UCSF_3786	6.6911	7.9511	8.8205	LeeY	22.3	1	Low
370	MDA_UCSF_3825	7.5567	7.0149	8.2674	LeeY	21.9	1	High
371	MDA_UCSF_3826	6.5242	6.8964	7.3371	LeeY	55.7	0	Low
372	MDA_UCSF_3827	7.4495	7.5663	6.9749	LeeY	7.4	1	Low
373	MDA_UCSF_3830	7.3153	7.6094	8.7431	LeeY	30.1	1	Low
374	MDA_UCSF_3832	9.3089	7.7557	7.3668	LeeY	17.7	1	High
375	MDA_UCSF_3833	7.9558	7.7718	8.4714	LeeY	12.9	1	High
376	MDA_UCSF_3834	6.8526	8.1392	7.0548	LeeY	7.4	1	Low
377	MDA_UCSF_3836	6.6057	6.192	6.7494	LeeY	3.7	1	Low
378	MDA_UCSF_3839	7.2491	7.5342	7.2082	LeeY	25.5	1	Low
379	MDA_UCSF_3895	7.6754	6.6692	7.5604	LeeY	7.6	1	High
380	MDA_UCSF_3897	7.9678	6.6565	7.5663	LeeY	13.1	1	High
381	MDA_UCSF_3899	6.5951	7.2081	8.36	LeeY	24.4	1	Low
382	MDA_UCSF_3900	7.4827	6.1992	7.0209	LeeY	14.3	1	High
383	MDA_UCSF_3901	6.5363	6.1921	6.6467	LeeY	34.5	1	Low
384	MDA_UCSF_3903	7.9802	7.5076	8.7516	LeeY	35.4	0	High
385	MDA_UCSF_3905	6.7874	6.339	6.0865	LeeY	28.8	1	Low
386	MDA_UCSF_3906	6.8284	7.4351	8.2506	LeeY	9	1	Low
387	MDA_UCSF_3907	8.3569	7.6591	8.2596	LeeY	18.2	1	High
388	MDA_UCSF_3910	7.6598	8.0866	6.6192	LeeY	2.8	1	High
389	MDA_UCSF_4094	6.2341	8.2156	7.1309	LeeY	11.7	1	Low
390	MDA_UCSF_4097	8.2548	7.5468	9.9199	LeeY	14.3	1	High
391	MDA_UCSF_4102	6.4372	7.183	7.9023	LeeY	20.9	1	Low
392	MDA_UCSF_4122	7.4724	7.0854	7.5306	LeeY	15	1	High
393	MDA_UCSF_4125	6.6686	6.0626	6.7469	LeeY	9.4	1	Low
394	MDA_UCSF_4126	7.7191	7.5032	9.141	LeeY	12.2	1	High
395	MDA_UCSF_4127	7.4135	7.9948	6.8179	LeeY	13.1	1	Low
396	MDA_UCSF_4128	7.276	8.2587	6.8897	LeeY	16.1	1	Low
397	MDA_UCSF_4129	8.1361	6.9131	7.5371	LeeY	0.7	1	High
398	MDA_UCSF_4747	7.3472	6.7706	7.8199	LeeY	63.7	0	Low
399	MDA_UCSF_4753	6.257	6.9922	8.1333	LeeY	33.4	0	Low
400	MDA_UCSF_4782	6.5776	5.988	6.6156	LeeY	16.8	1	Low
401	MDA_UCSF_4785	8.3561	7.3741	8.3946	LeeY	12.2	1	High
402	MDA_UCSF_4787	7.2227	6.8634	7.455	LeeY	12.2	1	Low
403	MDA_UCSF_4788	6.6249	6.9635	7.0712	LeeY	74.1	1	Low
404	MDA_UCSF_9907	7.2063	6.7554	6.3412	LeeY	33.6	0	Low
405	TB_1005	9.4734	6.8387	8.0663	LeeY	28.2	1	High
406	TB_1015	8.4209	7.7287	8.5011	LeeY	8.9	1	High
407	TB_1079	8.7979	7.7859	8.8414	LeeY	7.2	1	High
408	TB_1091	9.4589	7.8413	9.3862	LeeY	23.3	1	High
409	TB_1129	8.4328	8.1518	7.6468	LeeY	9.5	1	High
410	TB_1143	9.3035	6.9692	7.351	LeeY	19.9	1	High
411	TB_115	6.5665	7.3028	8.0409	LeeY	4.8	1	Low
412	TB_1166	7.4227	7.3122	8.7389	LeeY	19.7	1	Low
413	TB_1170	7.7623	6.7925	8.7358	LeeY	1.3	1	High
414	TB_1271	8.6989	7.5295	7.9201	LeeY	1.3	1	High
415	TB_1288	8.9571	6.3782	7.3601	LeeY	7.7	1	High
416	TB_1297	7.6267	8.341	7.6333	LeeY	18.4	1	High
417	TB_1406	9.4281	7.7001	9.3276	LeeY	3.8	1	High
418	TB_1522	8.34	8.0754	8.5255	LeeY	19.4	1	High
419	TB_156	7.9918	6.9707	9.1543	LeeY	19.4	1	High
420	TB_192	8.6237	7.0405	7.9603	LeeY	8.6	1	High
421	TB_383	7.6635	6.5607	7.0701	LeeY	6.8	1	High
422	TB_564	6.9349	6.4447	7.3034	LeeY	7.9	1	Low
423	TB_686	7.4495	7.6509	8.522	LeeY	12	1	Low
424	TB_69	7.4616	7.1003	8.4017	LeeY	21.2	1	Low
425	TB_70	9.3739	7.3421	6.4999	LeeY	30.3	1	High
426	TB_711	8.038	7.9183	8.1367	LeeY	55.8	1	High
427	TB_883	7.8134	6.8313	6.9902	LeeY	19.2	1	High
428	TB_906	6.7351	6.9122	8.6104	LeeY	3.6	1	Low
429	TB_917	8.2616	7.4889	8.34	LeeY	16	1	High
430	TB_943	7.9177	7.9808	8.8716	LeeY	24	1	High
431	TB_956	8.0903	7.1537	7.3148	LeeY	23.3	1	High
432	TB_959	7.2791	7.5654	9.5705	LeeY	6	1	Low
433	TB_966	6.7534	7.8176	6.9395	LeeY	19	1	Low
434	TB_987	7.6731	7.1537	7.659	LeeY	9.5	1	High
435	TB_999	8.5255	6.8643	7.5839	LeeY	1.5	1	High
436	TCGA.02.0001	5.03375	-0.0725385	0.82825	TCGA Agilent	11.8	1	High
437	TCGA.02.0003	3.967	-0.0134615	2.11925	TCGA Agilent	4.7	1	High
438	TCGA.02.0004	5.3565	-0.574	1.387	TCGA Agilent	11.3	1	High
439	TCGA.02.0007	6.37362	0.644923	-0.065875	TCGA Agilent	23.2	1	High
440	TCGA.02.0009	3.93388	0.998231	2.266	TCGA Agilent	10.6	1	Low
441	TCGA.02.0010	-0.665875	-2.30285	1.73737	TCGA Agilent	35.4	1	Low
442	TCGA.02.0011	-0.469375	-0.206923	0.43275	TCGA Agilent	20.7	1	Low
443	TCGA.02.0014	0.597875	-2.903	0.401625	TCGA Agilent	82.6	1	Low
444	TCGA.02.0015	1.9845	0.335923	1.91975	TCGA Agilent	20.6	1	Low
445	TCGA.02.0016	3.13287	-0.407692	2.29712	TCGA Agilent	87.1	1	Low
446	TCGA.02.0021	4.97975	-0.419769	2.13013	TCGA Agilent	77.7	1	High
447	TCGA.02.0023	3.762	-0.0940769	1.24075	TCGA Agilent	20.1	1	Low
448	TCGA.02.0024	2.15025	-0.410308	1.7515	TCGA Agilent	53.1	1	Low
449	TCGA.02.0025	2.08188	-2.13492	1.23638	TCGA Agilent	42.7	1	Low
450	TCGA.02.0026	0.952	-1.20592	0.5985	TCGA Agilent	24.6	1	Low
451	TCGA.02.0027	3.0815	-0.342385	1.74438	TCGA Agilent	12.2	1	Low
452	TCGA.02.0028	0.076	-0.249154	2.3415	TCGA Agilent	90.6	1	Low
453	TCGA.02.0033	3.55675	-1.047	1.41975	TCGA Agilent	2.8	1	Low
454	TCGA.02.0034	5.01112	0.219615	1.4005	TCGA Agilent	14.1	1	High
455	TCGA.02.0038	3.33012	0.180154	1.95362	TCGA Agilent	10.7	1	Low
456	TCGA.02.0039	2.51363	-0.0314615	2.32938	TCGA Agilent	10.5	1	Low
457	TCGA.02.0043	3.19512	0.556154	2.8445	TCGA Agilent	18.3	1	Low
458	TCGA.02.0046	2.106	0.191615	2.31612	TCGA Agilent	6.9	1	Low
459	TCGA.02.0047	0.763	-0.795231	1.17312	TCGA Agilent	14.7	1	Low
460	TCGA.02.0048	4.35275	-0.0830769	2.33387	TCGA Agilent	3.2	1	High
461	TCGA.02.0051	3.309	-0.985923	0.676125	TCGA Agilent	15.1	1	Low
462	TCGA.02.0052	1.79612	-0.399462	0.945125	TCGA Agilent	12.6	1	Low
463	TCGA.02.0054	3.73238	0.293154	0.992875	TCGA Agilent	6.5	1	Low
464	TCGA.02.0057	3.25375	0.632385	1.20863	TCGA Agilent	19.9	1	Low
465	TCGA.02.0058	0.11625	-0.206077	-0.2535	TCGA Agilent	8.3	1	Low
466	TCGA.02.0059	3.70288	-0.764923	1.35662	TCGA Agilent	9.6	1	Low
467	TCGA.02.0060	-0.02175	-0.0713077	1.36225	TCGA Agilent	6	1	Low
468	TCGA.02.0064	4.29175	0.164231	1.69887	TCGA Agilent	19.7	1	High
469	TCGA.02.0068	3.13888	0.240308	1.55987	TCGA Agilent	26.4	1	Low
470	TCGA.02.0069	4.895	-1.47338	2.00137	TCGA Agilent	28.7	0	High
471	TCGA.02.0070	4.00237	0.829769	1.81475	TCGA Agilent	25.1	0	High
472	TCGA.02.0071	3.9415	0.618769	1.973	TCGA Agilent	5.5	1	Low
473	TCGA.02.0074	3.64938	-1.58377	1.17263	TCGA Agilent	10.2	1	Low
474	TCGA.02.0075	3.441	-0.308615	1.54438	TCGA Agilent	20.8	1	Low
475	TCGA.02.0079	3.06438	-0.104231	0.020125	TCGA Agilent	27.2	1	Low
476	TCGA.02.0080	1.77163	0.515	0.663875	TCGA Agilent	89.7	1	Low
477	TCGA.02.0083	5.007	-0.532462	2.08775	TCGA Agilent	22.7	1	High
478	TCGA.02.0084	3.053	-1.64938	1.72863	TCGA Agilent	12.6	1	Low
479	TCGA.02.0085	5.30175	-0.163308	-0.08075	TCGA Agilent	51.3	1	High
480	TCGA.02.0086	2.41463	0.166846	1.859	TCGA Agilent	8.8	1	Low
481	TCGA.02.0087	2.3085	-0.735923	2.24613	TCGA Agilent	57.8	0	Low
482	TCGA.02.0089	4.88837	-0.193077	1.60662	TCGA Agilent	17	1	High
483	TCGA.02.0099	4.83025	0.671538	1.25625	TCGA Agilent	3.5	1	High
484	TCGA.02.0102	5.59075	0.378692	1.654	TCGA Agilent	27	1	High
485	TCGA.02.0104	0.842375	-1.38123	0.88425	TCGA Agilent	65	1	Low
486	TCGA.02.0106	4.03137	-1.07231	2.03337	TCGA Agilent	11.7	1	High
487	TCGA.02.0107	5.0725	-0.425692	1.2305	TCGA Agilent	17.6	1	High
488	TCGA.02.0111	1.97162	-0.0676923	2.252	TCGA Agilent	23.2	1	Low
489	TCGA.02.0113	0.7915	0.623	1.14237	TCGA Agilent	92.7	0	Low
490	TCGA.02.0114	-0.910875	-1.42662	0.834125	TCGA Agilent	100	1	Low
491	TCGA.02.0115	3.962	0.190923	1.55363	TCGA Agilent	15.7	1	Low
492	TCGA.02.0116	4.42237	0.417923	2.27913	TCGA Agilent	49	1	High
493	TCGA.02.0258	0.19625	-0.0896154	-0.215875	TCGA Agilent	16.5	1	Low
494	TCGA.02.0260	3.57025	0.488846	2.33763	TCGA Agilent	16.9	1	Low
495	TCGA.02.0266	4.16937	0.188923	1.94962	TCGA Agilent	17.7	1	High
496	TCGA.02.0269	5.36113	0.868154	3.25475	TCGA Agilent	10.8	1	High
497	TCGA.02.0271	2.71163	-0.389462	1.135	TCGA Agilent	14.5	1	Low
498	TCGA.02.0281	1.49087	-0.716077	2.03925	TCGA Agilent	4	1	Low
499	TCGA.02.0285	4.66425	0.608923	2.24187	TCGA Agilent	13.9	1	High
500	TCGA.02.0289	4.95162	0.661692	2.93087	TCGA Agilent	14.2	1	High
501	TCGA.02.0290	5.91937	0.314769	3.114	TCGA Agilent	15.9	1	High
502	TCGA.02.0317	3.72587	-0.207846	2.22463	TCGA Agilent	12.2	1	Low
503	TCGA.02.0321	4.826	0.133385	0.81225	TCGA Agilent	9.9	1	High
504	TCGA.02.0324	4.7425	0.311538	1.6125	TCGA Agilent	7.7	1	High
505	TCGA.02.0325	3.76325	-0.61	-0.298875	TCGA Agilent	10.6	1	Low
506	TCGA.02.0326	1.43625	-0.512385	1.35337	TCGA Agilent	7.3	1	Low
507	TCGA.02.0330	4.45638	-0.0243077	-0.2065	TCGA Agilent	15.9	1	High
508	TCGA.02.0332	1.87138	-0.0482308	2.48225	TCGA Agilent	25.7	1	Low
509	TCGA.02.0333	3.47425	-0.039	2.57925	TCGA Agilent	4.4	1	Low
510	TCGA.02.0337	3.75862	-0.756769	1.67637	TCGA Agilent	25.1	1	Low
511	TCGA.02.0338	-0.521875	-1.61508	2.26037	TCGA Agilent	10.6	1	Low
512	TCGA.02.0339	1.05675	-1.14685	1.84213	TCGA Agilent	12.4	1	Low
513	TCGA.02.0422	4.4505	0.112154	2.04162	TCGA Agilent	14.5	1	High
514	TCGA.02.0430	3.424	0.266231	1.80038	TCGA Agilent	10.6	1	Low
515	TCGA.02.0432	0.292625	-1.45954	-0.007125	TCGA Agilent	47.1	1	Low
516	TCGA.02.0439	3.437	0.193769	0.7605	TCGA Agilent	0.7	1	Low
517	TCGA.02.0440	2.51938	-0.304077	0.84775	TCGA Agilent	11.3	1	Low
518	TCGA.02.0446	3.94075	-1.35738	0.40125	TCGA Agilent	9.3	1	Low
519	TCGA.02.0451	4.89712	0.138923	0.702625	TCGA Agilent	16.2	1	High
520	TCGA.02.0456	3.30912	-1.271	-0.207625	TCGA Agilent	3.4	1	Low
521	TCGA.02.2466	2.36937	-1.14362	0.748125	TCGA Agilent	16.8	1	Low
522	TCGA.02.2470	5.59225	-0.503538	1.11712	TCGA Agilent	12.9	1	High
523	TCGA.02.2483	1.21125	-1.38131	2.19787	TCGA Agilent	15.3	0	Low
524	TCGA.02.2485	3.31875	1.83931	2.347	TCGA Agilent	15.4	0	Low
525	TCGA.02.2486	3.81212	0.0653077	0.68375	TCGA Agilent	20.3	1	Low
526	TCGA.06.0122	4.99913	0.0723846	1.95463	TCGA Agilent	6.2	1	High
527	TCGA.06.0124	5.5415	-0.200077	2.16113	TCGA Agilent	20.4	1	High
528	TCGA.06.0125	4.28175	-0.156769	2.13825	TCGA Agilent	47.6	1	High
529	TCGA.06.0126	4.36562	0.0246154	2.69563	TCGA Agilent	6.9	1	High
530	TCGA.06.0127	3.42125	-0.235308	1.92875	TCGA Agilent	4	1	Low
531	TCGA.06.0128	3.1	-1.14638	0.610875	TCGA Agilent	22.7	1	Low
532	TCGA.06.0129	-0.500625	-1.52846	1.32625	TCGA Agilent	33.7	1	Low
533	TCGA.06.0130	4.76588	-0.857077	2.36425	TCGA Agilent	12.9	1	High
534	TCGA.06.0132	4.32038	-1.07585	0.402875	TCGA Agilent	25.4	1	High
535	TCGA.06.0133	5.34563	0.181615	0.835125	TCGA Agilent	14.3	1	High
536	TCGA.06.0137	5.36313	-0.338	2.96413	TCGA Agilent	26.7	1	High
537	TCGA.06.0138	3.8475	0.408538	2.11713	TCGA Agilent	24.2	1	Low
538	TCGA.06.0139	4.49012	-1.70638	0.94975	TCGA Agilent	11.9	1	High
539	TCGA.06.0140	4.10225	1.10054	0.396625	TCGA Agilent	0.2	1	High
540	TCGA.06.0141	4.83025	-1.02715	0.525625	TCGA Agilent	10.3	1	High
541	TCGA.06.0142	3.01162	-1.54938	-0.0905	TCGA Agilent	2.2	1	Low
542	TCGA.06.0143	6.54188	-0.0403077	1.68087	TCGA Agilent	11.7	1	High
543	TCGA.06.0145	3.54575	0.226923	2.08975	TCGA Agilent	2.3	1	Low
544	TCGA.06.0146	1.4695	-1.36654	1.08638	TCGA Agilent	20.1	1	Low
545	TCGA.06.0147	4.61688	-0.896462	2.3	TCGA Agilent	17.8	1	High
546	TCGA.06.0148	4.02837	0.499308	1.727	TCGA Agilent	10.1	1	High
547	TCGA.06.0149	4.2745	0.488308	1.43325	TCGA Agilent	8.6	1	High
548	TCGA.06.0152	2.939	0.0327692	2.13025	TCGA Agilent	12.3	1	Low
549	TCGA.06.0154	4.63625	-0.343308	2.26613	TCGA Agilent	13.9	1	High
550	TCGA.06.0155	5.89963	-0.507462	1.48063	TCGA Agilent	10.4	1	High
551	TCGA.06.0156	4.81112	-0.446846	0.99725	TCGA Agilent	5.8	1	High
552	TCGA.06.0157	4.90712	0.772	2.97525	TCGA Agilent	3.2	1	High
553	TCGA.06.0158	2.864	0.471077	1.79225	TCGA Agilent	10.8	1	Low
554	TCGA.06.0160	1.00087	-1.40077	-0.513125	TCGA Agilent	11.8	1	Low
555	TCGA.06.0162	5.05625	-0.0386154	-0.015375	TCGA Agilent	3.4	1	High
556	TCGA.06.0164	4.01825	-0.635231	2.3895	TCGA Agilent	56.9	1	High
557	TCGA.06.0166	1.57688	-0.622538	1.5135	TCGA Agilent	5.8	1	Low
558	TCGA.06.0167	2.26737	-0.987154	-0.507875	TCGA Agilent	11.4	1	Low
559	TCGA.06.0168	1.46738	0.255769	0.88775	TCGA Agilent	19.7	1	Low
560	TCGA.06.0169	4.31463	0.0669231	1.71437	TCGA Agilent	3.3	1	High
561	TCGA.06.0171	2.72737	0.0188462	1.758	TCGA Agilent	13.1	1	Low
562	TCGA.06.0173	3.05325	0.0599231	1.54087	TCGA Agilent	4.5	1	Low
563	TCGA.06.0174	3.57325	0.240692	1.80862	TCGA Agilent	3.2	1	Low
564	TCGA.06.0175	2.537	-0.0753077	2.5545	TCGA Agilent	4	1	Low
565	TCGA.06.0176	0.11275	-0.235385	1.72325	TCGA Agilent	91	0	Low
566	TCGA.06.0177	4.30387	-2.13677	0.59175	TCGA Agilent	4.2	1	High
567	TCGA.06.0178	1.88675	-1.07292	1.37563	TCGA Agilent	88.1	1	Low
568	TCGA.06.0179	4.028	-0.736692	1.51875	TCGA Agilent	20.2	1	High
569	TCGA.06.0182	3.72325	0.567692	2.18788	TCGA Agilent	3.6	1	Low
570	TCGA.06.0184	3.05163	-0.187692	1.59125	TCGA Agilent	69.9	1	Low
571	TCGA.06.0185	3.42013	0.743231	1.31987	TCGA Agilent	73.8	0	Low
572	TCGA.06.0187	4.43575	1.28108	2.52962	TCGA Agilent	27.2	1	High
573	TCGA.06.0188	3.59362	-0.588462	0.968375	TCGA Agilent	44.6	1	Low
574	TCGA.06.0189	4.63825	-0.146308	1.99125	TCGA Agilent	15.4	1	High
575	TCGA.06.0190	4.8135	0.140846	1.85438	TCGA Agilent	10.4	1	High
576	TCGA.06.0192	2.80812	0.297615	2.44675	TCGA Agilent	39	1	Low
577	TCGA.06.0194	4.25962	-0.304846	1.08075	TCGA Agilent	4.7	1	High
578	TCGA.06.0195	2.15537	1.45362	1.63338	TCGA Agilent	7.4	1	Low
579	TCGA.06.0197	3.98575	-0.685	1.50212	TCGA Agilent	5.6	1	High
580	TCGA.06.0201	0.137125	-0.37	-0.097	TCGA Agilent	0.4	1	Low
581	TCGA.06.0206	5.35787	-0.713615	2.02787	TCGA Agilent	7.7	1	High
582	TCGA.06.0208	3.86137	0.143385	2.46088	TCGA Agilent	8.4	1	Low
583	TCGA.06.0210	6.53725	-0.501769	2.36463	TCGA Agilent	7.4	1	High
584	TCGA.06.0211	2.95838	-0.371308	3.09437	TCGA Agilent	11.8	1	Low
585	TCGA.06.0213	4.68088	-0.0387692	1.1565	TCGA Agilent	0.5	1	High
586	TCGA.06.0214	4.0045	0.281538	2.12763	TCGA Agilent	15	1	High
587	TCGA.06.0216	1.60337	-1.41008	-0.5315	TCGA Agilent	24.2	1	Low
588	TCGA.06.0219	3.73037	-0.393385	1.076	TCGA Agilent	0.7	1	Low
589	TCGA.06.0221	0.3855	-1.29115	1.76438	TCGA Agilent	19.8	1	Low
590	TCGA.06.0237	4.61463	0.629769	0.832	TCGA Agilent	13.6	1	High
591	TCGA.06.0238	2.94512	-1.38215	0.534125	TCGA Agilent	13.3	1	Low
592	TCGA.06.0240	2.98612	-0.918308	0.086875	TCGA Agilent	20.4	1	Low
593	TCGA.06.0241	2.76213	-0.702692	1.73237	TCGA Agilent	48.7	1	Low
594	TCGA.06.0394	2.08738	-0.515231	2.65413	TCGA Agilent	10.8	1	Low
595	TCGA.06.0397	1.029	-1.77208	0.33375	TCGA Agilent	9	1	Low
596	TCGA.06.0402	4.27925	-0.118385	3.06937	TCGA Agilent	0.3	1	High
597	TCGA.06.0409	3.01875	0.00246154	1.94975	TCGA Agilent	72.4	1	Low
598	TCGA.06.0410	1.4875	-0.555462	1.62338	TCGA Agilent	4.7	1	Low
599	TCGA.06.0412	5.84788	0.496769	1.72525	TCGA Agilent	9.6	1	High
600	TCGA.06.0413	1.74025	-0.384846	1.13563	TCGA Agilent	3.2	1	Low
601	TCGA.06.0414	1.60838	-1.14054	0.639125	TCGA Agilent	35.1	1	Low
602	TCGA.06.0644	4.23337	-1.54838	2.35688	TCGA Agilent	12.6	1	High
603	TCGA.06.0645	3.94062	-0.226692	1.88338	TCGA Agilent	5.8	1	Low
604	TCGA.06.0646	2.91012	0.0932308	1.777	TCGA Agilent	5.8	1	Low
605	TCGA.06.0648	3.85637	-1.01623	0.482	TCGA Agilent	9.8	1	Low
606	TCGA.06.0649	3.75712	-1.07046	0.435875	TCGA Agilent	2.1	1	Low
607	TCGA.06.0650				TCGA Agilent	23.6	1	Low
608	TCGA.06.0686	2.421	-0.406846	0.731625	TCGA Agilent	14.2	1	Low
609	TCGA.06.0743	4.88788	0.461077	2.44488	TCGA Agilent	26.4	1	High
610	TCGA.06.0744	3.466	0.498769	2.73125	TCGA Agilent	46.9	1	Low
611	TCGA.06.0745	4.2695	-0.140923	2.52225	TCGA Agilent	7.9	1	High
612	TCGA.06.0747	3.03375	0.380154	2.283	TCGA Agilent	2.7	1	Low
613	TCGA.06.0749	4.247	0.276308	0.08575	TCGA Agilent	2.7	1	High
614	TCGA.06.0750	5.4065	-0.0877692	1.7205	TCGA Agilent	0.9	1	High
615	TCGA.06.0875	1.247	-1.01508	0.612625	TCGA Agilent	43.5	0	Low
616	TCGA.06.0876	4.452	-0.0570769	1.49812	TCGA Agilent	46.2	0	High
617	TCGA.06.0877	5.01088	-1.29538	1.98838	TCGA Agilent	5.7	1	High
618	TCGA.06.0878	3.80837	-0.126846	1.83337	TCGA Agilent	7.2	0	Low
619	TCGA.06.0879	2.452	0.821308	1.46388	TCGA Agilent	40.4	1	Low
620	TCGA.06.0881	4.11337	-1.349	0.930625	TCGA Agilent	16.6	1	High
621	TCGA.06.0882	4.64787	0.270692	1.549	TCGA Agilent	20.8	1	High
622	TCGA.06.0939	2.92175	-0.429923	0.99425	TCGA Agilent	26.8	1	Low
623	TCGA.06.1084	5.34225	-0.827154	2.02562	TCGA Agilent	23.9	1	High
624	TCGA.06.1086	4.44075	1.37446	3.81513	TCGA Agilent	6.8	1	High
625	TCGA.06.1087	4.57637	-2.27615	0.984	TCGA Agilent	4	1	High
626	TCGA.06.1800	5.417	-1.32323	1.52212	TCGA Agilent	26.8	1	High
627	TCGA.06.1801	2.42	-0.626769	1.29487	TCGA Agilent	11.8	1	Low
628	TCGA.06.1802	3.60787	0.429077	1.958	TCGA Agilent	15.3	1	Low
629	TCGA.06.1804				TCGA Agilent	13.6	1	Low
630	TCGA.06.1805	2.67612	-0.727538	0.935125	TCGA Agilent	33.9	0	Low
631	TCGA.06.2557	5.23562	0.693846	3.27062	TCGA Agilent	1.1	1	High
632	TCGA.06.2558	3.22063	-0.219231	1.27175	TCGA Agilent	12.5	1	Low
633	TCGA.06.2559	4.85288	0.704769	2.72363	TCGA Agilent	4.9	1	High
634	TCGA.06.2561	5.53437	-0.464462	1.256	TCGA Agilent	17.6	1	High
635	TCGA.06.2562	4.30087	-0.979077	3.27513	TCGA Agilent	12.6	1	High
636	TCGA.06.2563	3.90638	0.0508462	2.8145	TCGA Agilent	30.6	0	Low
637	TCGA.06.2564	4.36975	0.104077	1.87763	TCGA Agilent	6	0	High
638	TCGA.06.2565	4.88488	0.355308	3.47675	TCGA Agilent	16.6	1	High
639	TCGA.06.2566	2.29688	-0.903769	1.73687	TCGA Agilent	6	1	Low
640	TCGA.06.2567	4.93562	1.02531	0.68225	TCGA Agilent	4.4	1	High
641	TCGA.06.2569	5.84425	1.29208	1.08225	TCGA Agilent	0.4	0	High
642	TCGA.06.2570	0.018625	-1.62277	1.59062	TCGA Agilent	31.5	0	Low
643	TCGA.06.5408				TCGA Agilent	11.7	1	Low
644	TCGA.06.5410				TCGA Agilent	3.5	1	Low
645	TCGA.06.5411				TCGA Agilent	8.3	1	Low
646	TCGA.06.5412				TCGA Agilent	4.5	1	Low
647	TCGA.06.5413				TCGA Agilent	8.8	0	Low
648	TCGA.06.5414	3.82863	0.0857692	1.66987	TCGA Agilent	9	0	Low
649	TCGA.06.5415	4.727	-0.317154	2.22713	TCGA Agilent	8.6	0	High
650	TCGA.06.5416	6.01788	-1.22623	1.982	TCGA Agilent	6.7	0	High
651	TCGA.06.5417	0.44025	-1.35223	1.8325	TCGA Agilent	5.1	0	Low
652	TCGA.06.5418	4.52837	0.220538	2.01825	TCGA Agilent	2.7	1	High
653	TCGA.06.5856				TCGA Agilent	3.8	1	Low
654	TCGA.06.5858				TCGA Agilent	6.2	0	Low
655	TCGA.06.5859				TCGA Agilent	4.6	0	Low
656	TCGA.06.6389				TCGA Agilent	7.8	0	Low
657	TCGA.06.6390				TCGA Agilent	5.4	1	Low
658	TCGA.06.6391				TCGA Agilent	1.5	1	Low
659	TCGA.08.0244	3.54663	-0.329769	1.24212	TCGA Agilent	22.7	1	Low
660	TCGA.08.0245	0.099375	-0.183769	1.25863	TCGA Agilent	37.8	1	Low
661	TCGA.08.0246	4.61675	0.623385	1.71025	TCGA Agilent	4.2	1	High
662	TCGA.08.0344	-0.127	-1.592	-0.091	TCGA Agilent	115.9	1	Low
663	TCGA.08.0345	3.41475	-0.252769	-0.000375	TCGA Agilent	1.7	1	Low
664	TCGA.08.0346	4.17762	-0.854615	1.12013	TCGA Agilent	8.4	1	High
665	TCGA.08.0347	4.32538	-0.635846	0.574875	TCGA Agilent	25.7	1	High
666	TCGA.08.0348	1.31175	-0.894692	0.626625	TCGA Agilent	12.2	1	Low
667	TCGA.08.0349	4.08913	0.0685385	0.9325	TCGA Agilent	9.8	1	High
668	TCGA.08.0350	3.10875	-0.663692	0.93975	TCGA Agilent	29.2	1	Low
669	TCGA.08.0351	1.82937	-0.972308	0.596375	TCGA Agilent	65.3	1	Low
670	TCGA.08.0352	4.643	-0.348538	2.3165	TCGA Agilent	1.3	1	High
671	TCGA.08.0353	4.47412	0.290077	2.33812	TCGA Agilent	8.4	1	High
672	TCGA.08.0354	3.76375	0.282231	0.683875	TCGA Agilent	17.9	1	Low
673	TCGA.08.0355	4.7045	-0.191615	1.22887	TCGA Agilent	24.6	1	High
674	TCGA.08.0356	4.44375	0.338769	2.9065	TCGA Agilent	31.1	1	High
675	TCGA.08.0357	4.75263	-0.0213077	2.00013	TCGA Agilent	37.6	1	High
676	TCGA.08.0358	3.74713	0.627	1.50513	TCGA Agilent	22.3	1	Low
677	TCGA.08.0359	2.02738	-0.173538	0.89925	TCGA Agilent	3.4	1	Low
678	TCGA.08.0360	3.92925	-0.609462	0.576625	TCGA Agilent	15.4	1	Low
679	TCGA.08.0373	4.499	-0.629231	0.73525	TCGA Agilent	4.4	1	High
680	TCGA.08.0375	1.5115	-0.376	2.18863	TCGA Agilent	12.2	1	Low
681	TCGA.08.0380	3.77913	0.00692308	0.091375	TCGA Agilent	14.9	1	Low
682	TCGA.08.0385	2.86238	-1.07369	1.47138	TCGA Agilent	2.7	1	Low
683	TCGA.08.0386	3.31513	0.240077	0.203875	TCGA Agilent	18	1	Low
684	TCGA.08.0389	3.15837	0.0295385	1.332	TCGA Agilent	15.3	1	Low
685	TCGA.08.0390	4.01075	-1.51731	1.14037	TCGA Agilent	14	1	High
686	TCGA.08.0392	3.17263	-1.50708	2.73612	TCGA Agilent	0.7	1	Low
687	TCGA.08.0509	4.70275	-0.72	1.712	TCGA Agilent	12.6	1	High
688	TCGA.08.0510	5.611	0.128	1.88387	TCGA Agilent	4.3	1	High
689	TCGA.08.0511	3.5225	0.317231	3.109	TCGA Agilent	7.7	1	Low
690	TCGA.08.0512	4.66625	-0.366923	1.3345	TCGA Agilent	42.1	1	High
691	TCGA.08.0514	4.1555	0.305846	2.32687	TCGA Agilent	11.1	1	High
692	TCGA.08.0516	0.92625	-0.134769	2.8985	TCGA Agilent	19.6	1	Low
693	TCGA.08.0517	2.3835	-0.365923	1.01925	TCGA Agilent	58.7	1	Low
694	TCGA.08.0518	5.6295	0.506385	1.96687	TCGA Agilent	19.3	1	High
695	TCGA.08.0520	3.76788	-0.477154	0.3265	TCGA Agilent	10.8	1	Low
696	TCGA.08.0521	0.515625	-1.18931	2.03463	TCGA Agilent	4.8	1	Low
697	TCGA.08.0522	2.65512	-0.967077	0.60575	TCGA Agilent	20.9	1	Low
698	TCGA.08.0524	1.15675	-1.73146	1.44825	TCGA Agilent	7.3	1	Low
699	TCGA.08.0525	5.56313	0.220308	1.9905	TCGA Agilent	16	1	High
700	TCGA.08.0529	4.63537	0.0722308	1.83137	TCGA Agilent	18.4	1	High
701	TCGA.08.0531	3.87862	0.229154	2.018	TCGA Agilent	7.6	1	Low
702	TCGA.12.0616	3.75762	-0.786615	1.52887	TCGA Agilent	14.7	1	Low
703	TCGA.12.0618	2.261	-1.03377	1.14362	TCGA Agilent	13	1	Low
704	TCGA.12.0619	4.422	-0.421769	0.782375	TCGA Agilent	34.9	1	High
705	TCGA.12.0620	2.18075	-0.0844615	1.93275	TCGA Agilent	10.4	1	Low
706	TCGA.12.0654	4.624	-0.844385	1.61538	TCGA Agilent	7.6	1	High
707	TCGA.12.0656	3.79	0.546923	2.67912	TCGA Agilent	94.8	1	Low
708	TCGA.12.0657	2.85925	0.463769	1.71825	TCGA Agilent	0.1	1	Low
709	TCGA.12.0670	2.08025	0.278462	0.6525	TCGA Agilent	26	1	Low
710	TCGA.12.0688	3.08162	-0.0783077	2.66312	TCGA Agilent	26.7	1	Low
711	TCGA.12.0692	5.21687	0.200385	2.71575	TCGA Agilent	3.6	1	High
712	TCGA.12.0703	5.44825	-0.936077	1.96287	TCGA Agilent	20.4	1	High
713	TCGA.12.0707	4.5075	0.679923	1.38187	TCGA Agilent	28.4	1	High
714	TCGA.12.0772	2.5255	0.476077	1.647	TCGA Agilent	53.9	1	Low
715	TCGA.12.0773	1.00287	0.245231	1.18687	TCGA Agilent	43.2	1	Low
716	TCGA.12.0775	4.50125	-0.160769	0.970875	TCGA Agilent	7.6	1	High
717	TCGA.12.0776	4.04475	-0.519231	1.07987	TCGA Agilent	9.7	1	High
718	TCGA.12.0778	4.296	0.0148462	1.926	TCGA Agilent	14.9	1	High
719	TCGA.12.0780	3.53238	0.366077	2.49162	TCGA Agilent	14.9	1	Low
720	TCGA.12.0818	2.0795	0.366077	0.628875	TCGA Agilent	91.8	1	Low
721	TCGA.12.0819	2.938	-0.328462	2.321	TCGA Agilent	24.8	1	Low
722	TCGA.12.0820	0.341875	0.0106154	2.03563	TCGA Agilent	18.5	1	Low
723	TCGA.12.0821	4.29025	0.0336923	1.90375	TCGA Agilent	10.6	1	High
724	TCGA.12.0822	3.4915	-0.780846	1.257	TCGA Agilent	23.5	1	Low
725	TCGA.12.0826	4.5595	-0.0903077	1.39437	TCGA Agilent	27.8	1	High
726	TCGA.12.0827	1.98025	-1.60962	2.39225	TCGA Agilent	38.8	1	Low
727	TCGA.12.0828	4.14313	-0.576077	0.808625	TCGA Agilent	8.9	1	High
728	TCGA.12.0829	4.18963	-0.544308	0.724625	TCGA Agilent	20.6	1	High
729	TCGA.12.1088	4.47325	-0.0576154	1.20112	TCGA Agilent	127.6	1	High
730	TCGA.12.1089	4.08263	0.606846	0.92925	TCGA Agilent	5.8	1	High
731	TCGA.12.1090	4.65538	-0.707308	0.9375	TCGA Agilent	7.6	1	High
732	TCGA.12.1091	5.626	0.391231	1.7595	TCGA Agilent	33.2	1	High
733	TCGA.12.1092	4.26975	-0.588769	1.38138	TCGA Agilent	21.7	1	High
734	TCGA.12.1093	4.99587	-0.336615	0.811875	TCGA Agilent	16	1	High
735	TCGA.12.1094	2.21475	-0.0955385	2.63813	TCGA Agilent	12.2	1	Low
736	TCGA.12.1095	4.54812	-0.930385	1.38738	TCGA Agilent	15.8	1	High
737	TCGA.12.1096	3.59587	-0.466538	1.43225	TCGA Agilent	9.1	1	Low
738	TCGA.12.1097	4.51288	0.300692	1.33825	TCGA Agilent	14.5	1	High
739	TCGA.12.1098	4.43313	-0.482154	1.01713	TCGA Agilent	4	1	High
740	TCGA.12.1099	3.027	-0.228923	0.706375	TCGA Agilent	4.1	1	Low
741	TCGA.12.1597	2.96638	-0.353	2.40713	TCGA Agilent	22.2	1	Low
742	TCGA.12.1598	6.1435	-0.892462	0.831125	TCGA Agilent	15.7	1	High
743	TCGA.12.1599	4.75962	0.122769	1.7045	TCGA Agilent	25.7	1	High
744	TCGA.12.1600	2.04513	0.906154	2.65462	TCGA Agilent	14.7	1	Low
745	TCGA.12.1602	5.135	-0.250692	1.01937	TCGA Agilent	6.8	1	High
746	TCGA.12.3644	0.61475	-0.968	0.548625	TCGA Agilent	59.8	1	Low
747	TCGA.12.3646	1.87062	-0.519385	-0.142375	TCGA Agilent	44	1	Low
748	TCGA.12.3648	4.234	0.783923	3.904	TCGA Agilent	26.9	1	High
749	TCGA.12.3649	4.98337	-0.579769	2.51938	TCGA Agilent	15.2	1	High
750	TCGA.12.3650	5.381	0.507692	2.53412	TCGA Agilent	10.9	1	High
751	TCGA.12.3651	3.62075	-1.11877	0.25525	TCGA Agilent	12.7	1	Low
752	TCGA.12.3652	7.08425	0.485385	1.28625	TCGA Agilent	34.9	1	High
753	TCGA.12.3653	0.359875	0.214231	1.72863	TCGA Agilent	14.5	1	Low
754	TCGA.12.5295	1.897	-0.825077	1.17938	TCGA Agilent	14.9	1	Low
755	TCGA.12.5299	3.9795	0.535385	2.21163	TCGA Agilent	3.2	1	High
756	TCGA.12.5301	5.5605	-0.186462	1.00362	TCGA Agilent	2	1	High
757	TCGA.14.0736	5.4765	0.603231	0.991625	TCGA Agilent	15.1	1	High
758	TCGA.14.0781				TCGA Agilent	1	1	Low
759	TCGA.14.0783	4.8755	-0.214923	2.13463	TCGA Agilent	6.2	1	High
760	TCGA.14.0786	4.96612	0.175846	3.15813	TCGA Agilent	23.1	1	High
761	TCGA.14.0787	3.89588	-0.528231	2.38475	TCGA Agilent	2.2	1	Low
762	TCGA.14.0789	4.677	-0.316308	2.0245	TCGA Agilent	11.2	1	High
763	TCGA.14.0790	5.893	0.959923	1.58163	TCGA Agilent	13.8	1	High
764	TCGA.14.0812	3.86163	-0.297231	0.520875	TCGA Agilent	3.2	1	Low
765	TCGA.14.0813	4.88563	-0.322385	1.0285	TCGA Agilent	1.4	1	High
766	TCGA.14.0817	5.35262	-0.116692	1.32638	TCGA Agilent	5.4	1	High
767	TCGA.14.0865	2.598	-1.26246	1.56963	TCGA Agilent	16.5	1	Low
768	TCGA.14.0866	4.756	-0.137615	2.99425	TCGA Agilent	26.3	1	High
769	TCGA.14.0867	3.69837	-1.01254	1.31862	TCGA Agilent	2	1	Low
770	TCGA.14.0871	5.58925	-0.0155385	-1.00875	TCGA Agilent	28.9	1	High
771	TCGA.14.1034	4.51837	0.0212308	1.11625	TCGA Agilent	15.9	1	High
772	TCGA.14.1037	5.31463	-0.0196923	0.917375	TCGA Agilent	19.3	1	High
773	TCGA.14.1396	3.91475	-1.30531	1.72437	TCGA Agilent	1.1	1	Low
774	TCGA.14.1401	5.16275	-0.381615	1.49287	TCGA Agilent	3.8	1	High
775	TCGA.14.1402	3.97262	-0.106769	1.48863	TCGA Agilent	32	1	High
776	TCGA.14.1451	4.004	0.126692	0.96525	TCGA Agilent	23.1	1	High
777	TCGA.14.1452	5.51462	0.563154	2.1975	TCGA Agilent	7.1	1	High
778	TCGA.14.1453	2.08263	0.592846	2.46862	TCGA Agilent	1.1	1	Low
779	TCGA.14.1454	1.987	-1.39708	1.59137	TCGA Agilent	30.2	1	Low
780	TCGA.14.1455	2.38638	0.086	1.22637	TCGA Agilent	0.9	1	Low
781	TCGA.14.1456	2.17013	-0.744	1.16863	TCGA Agilent	41	0	Low
782	TCGA.14.1458	1.23412	-2.09254	0.256875	TCGA Agilent	6.7	1	Low
783	TCGA.14.1459	5.29563	-0.329077	1.48037	TCGA Agilent	12.4	1	High
784	TCGA.14.1794	4.9065	-0.406231	1.31838	TCGA Agilent	1	1	High
785	TCGA.14.1795	3.37725	-0.642154	2.067	TCGA Agilent	2	1	Low
786	TCGA.14.1821	-1.28087	-2.65962	1.2525	TCGA Agilent	17.8	1	Low
787	TCGA.14.1823	5.60288	-0.168538	0.831125	TCGA Agilent	17.9	1	High
788	TCGA.14.1825	2.82388	-1.50123	0.559375	TCGA Agilent	7.6	1	Low
789	TCGA.14.1827	4.6705	-0.131385	1.52913	TCGA Agilent	5.9	1	High
790	TCGA.14.1829	5.32038	-0.673231	1.25775	TCGA Agilent	7.2	0	High
791	TCGA.14.2554	4.11062	0.808154	2.07662	TCGA Agilent	17.5	1	High
792	TCGA.14.2555	5.40613	0.466692	3.38025	TCGA Agilent	8	0	High
793	TCGA.14.3476	4.25962	-0.786846	1.698	TCGA Agilent	0.4	1	High
794	TCGA.14.3477	-0.193375	-1.31685	1.59025	TCGA Agilent	3.8	0	Low
795	TCGA.14.4157	-0.93275	-3.18823	0.419375	TCGA Agilent	3.4	0	Low
796	TCGA.15.0742	1.94875	0.817308	2.09275	TCGA Agilent	13.8	1	Low
797	TCGA.15.1444				TCGA Agilent	50.5	1	Low
798	TCGA.15.1446	4.731	-0.474385	0.669125	TCGA Agilent	19.1	0	High
799	TCGA.15.1447	3.84187	-1.44392	2.81275	TCGA Agilent	53.2	0	Low
800	TCGA.15.1449	3.62625	-1.39554	3.06212	TCGA Agilent	13.3	1	Low
801	TCGA.16.0846	2.59413	-1.27708	-0.21575	TCGA Agilent	3.9	1	Low
802	TCGA.16.0848	4.03163	-0.873923	0.267625	TCGA Agilent	17.6	1	High
803	TCGA.16.0849	-0.144625	-1.55462	0.84775	TCGA Agilent	26.1	0	Low
804	TCGA.16.0850	-0.768125	-1.92208	1.18613	TCGA Agilent	16.4	1	Low
805	TCGA.16.0861	4.798	-0.451615	1.01313	TCGA Agilent	4.3	0	High
806	TCGA.16.1045	4.76875	-0.317462	0.683	TCGA Agilent	29	1	High
807	TCGA.16.1047	4.838	0.108615	1.33038	TCGA Agilent	4.6	1	High
808	TCGA.16.1048	5.59075	-0.460385	2.57213	TCGA Agilent			High
809	TCGA.16.1055	5.248	-0.641077	2.52363	TCGA Agilent	10.3	1	High
810	TCGA.16.1056	3.29137	1.07792	2.22975	TCGA Agilent	14	1	Low
811	TCGA.16.1060	4.06112	-0.549846	2.41038	TCGA Agilent	9.1	1	High
812	TCGA.16.1062	5.13912	0.186769	2.7335	TCGA Agilent	21.2	1	High
813	TCGA.16.1063	4.45162	0.272077	2.02275	TCGA Agilent	14	1	High
814	TCGA.16.1460	2.53325	-1.58208	1.44575	TCGA Agilent	6.4	0	Low
815	TCGA.19.0955	1.78163	-0.203077	2.06988	TCGA Agilent	11.8	0	Low
816	TCGA.19.0957	2.47225	-1.59831	0.627875	TCGA Agilent	21.9	1	Low
817	TCGA.19.0960	2.375	-0.777077	2.03987	TCGA Agilent	8.6	0	Low
818	TCGA.19.0962	4.87413	0.276846	0.961875	TCGA Agilent	0.7	1	High
819	TCGA.19.0963	3.92512	-1.14254	0.710125	TCGA Agilent	14.3	1	Low
820	TCGA.19.0964	1.45788	-0.0180769	1.5955	TCGA Agilent	3.4	0	Low
821	TCGA.19.1385	5.77813	0.621462	1.09125	TCGA Agilent	10.8	1	High
822	TCGA.19.1386	4.36375	0.885308	2.60213	TCGA Agilent	9.1	1	High
823	TCGA.19.1387	4.24637	-0.299462	0.256375	TCGA Agilent	6	0	High
824	TCGA.19.1388	2.627	-0.493308	2.61788	TCGA Agilent	12.9	1	Low
825	TCGA.19.1389	4.9635	-0.0968462	1.71525	TCGA Agilent	4.6	1	High
826	TCGA.19.1390	0.71625	-0.904923	2.30225	TCGA Agilent	25.4	1	Low
827	TCGA.19.1392	1.27675	-0.625923	0.552875	TCGA Agilent	3.6	1	Low
828	TCGA.19.1786	5.79138	1.40877	3.05888	TCGA Agilent	7.2	0	High
829	TCGA.19.1787	2.72162	0.379615	0.6195	TCGA Agilent	12.7	1	Low
830	TCGA.19.1788	1.45525	-1.29646	-0.26625	TCGA Agilent	3.7	1	Low
831	TCGA.19.1789	1.63062	-0.428769	1.18863	TCGA Agilent	3.2	1	Low
832	TCGA.19.1790	5.78062	0.126077	2.47412	TCGA Agilent	5.1	1	High
833	TCGA.19.1791	5.94688	0.501308	1.112	TCGA Agilent	0.1	0	High
834	TCGA.19.2619	0.40225	1.32146	2.60688	TCGA Agilent	9.7	0	Low
835	TCGA.19.2620	2.99025	-0.0856154	0.962625	TCGA Agilent	4.9	1	Low
836	TCGA.19.2621	5.0465	0.332692	0.7035	TCGA Agilent	1.1	1	High
837	TCGA.19.2623	4.37125	0.170462	1.37325	TCGA Agilent	7.5	0	High
838	TCGA.19.2624	3.881	0.629077	2.21125	TCGA Agilent	0.2	1	Low
839	TCGA.19.2625	4.77438	0.674769	1.0635	TCGA Agilent	4.1	1	High
840	TCGA.19.2629	3.51388	-1.09038	0.628	TCGA Agilent	24.2	1	Low
841	TCGA.19.2631	3.32063	0.447385	2.75462	TCGA Agilent	7	1	Low
842	TCGA.19.4068	5.67	0.146	1.34563	TCGA Agilent	4.5	0	High
843	TCGA.19.5947				TCGA Agilent	6.6	1	Low
844	TCGA.19.5950				TCGA Agilent	17.2	1	Low
845	TCGA.19.5951				TCGA Agilent	8	1	Low
846	TCGA.19.5952				TCGA Agilent	18.9	1	Low
847	TCGA.19.5954				TCGA Agilent	12.1	1	Low
848	TCGA.19.5955				TCGA Agilent	1.8	1	Low
849	TCGA.19.5956				TCGA Agilent	22.5	1	Low
850	TCGA.19.5958				TCGA Agilent	14.1	1	Low
851	TCGA.19.5959				TCGA Agilent	16.8	1	Low
852	TCGA.19.5960				TCGA Agilent	15	1	Low
853	TCGA.26.1438	4.43575	-0.402154	1.05937	TCGA Agilent	10	0	High
854	TCGA.26.1439	5.24388	0.297231	1.96487	TCGA Agilent	13.9	1	High
855	TCGA.26.1440	5.79713	-0.301077	2.0285	TCGA Agilent	9.7	0	High
856	TCGA.26.1442				TCGA Agilent	31.3	0	Low
857	TCGA.26.1443	4.99838	0.248077	2.4455	TCGA Agilent	7.1	0	High
858	TCGA.26.1799	5.79175	0.337308	2.54175	TCGA Agilent	9.4	1	High
859	TCGA.26.5132	5.62162	-0.196	1.22687	TCGA Agilent	9.4	0	High
860	TCGA.26.5133	2.64125	-0.967462	2.47613	TCGA Agilent	14.9	0	Low
861	TCGA.26.5134	5.0425	-0.244231	1.58975	TCGA Agilent	5.5	0	High
862	TCGA.26.5135	3.1405	-0.478462	2.32575	TCGA Agilent	8.9	1	Low
863	TCGA.26.5136	5.3545	0.259	0.2215	TCGA Agilent	19	1	High
864	TCGA.26.5139	4.99362	0.461462	1.53675	TCGA Agilent	1.6	0	High
865	TCGA.27.1830	5.00462	-0.890769	1.0785	TCGA Agilent	5.1	1	High
866	TCGA.27.1831	6.025	-0.116308	3.06413	TCGA Agilent	16.6	1	High
867	TCGA.27.1832	6.03325	-0.155077	-0.156125	TCGA Agilent	9.9	1	High
868	TCGA.27.1833	4.19838	0.101692	2.68962	TCGA Agilent	24.2	1	High
869	TCGA.27.1834	5.6935	-0.768615	0.537875	TCGA Agilent	40.5	1	High
870	TCGA.27.1835	5.5705	0.233231	2.95337	TCGA Agilent	21.3	1	High
871	TCGA.27.1836	2.401	-0.631769	1.95263	TCGA Agilent	30.1	1	Low
872	TCGA.27.1837	5.53012	-0.0270769	2.42925	TCGA Agilent	14	1	High
873	TCGA.27.1838	4.07512	0.665769	1.12187	TCGA Agilent	11.5	1	High
874	TCGA.27.2518	4.90375	0.310923	1.50513	TCGA Agilent	24.8	1	High
875	TCGA.27.2519	3.87787	-0.476077	0.871625	TCGA Agilent	18.1	1	Low
876	TCGA.27.2521	4.05187	-1.04323	1.8355	TCGA Agilent	10.4	0	High
877	TCGA.27.2523	3.1925	0.408	3.47187	TCGA Agilent	16.1	1	Low
878	TCGA.27.2524	5.26513	0.0763077	1.921	TCGA Agilent	7.6	1	High
879	TCGA.27.2526	3.65837	0.0316154	1.85125	TCGA Agilent	2.9	1	Low
880	TCGA.27.2527	4.49538	-0.987538	1.7555	TCGA Agilent	14.4	1	High
881	TCGA.27.2528	5.487	0.253615	2.91075	TCGA Agilent	15.8	1	High
882	TCGA.28.1745	2.93375	0.353846	-0.78525	TCGA Agilent	11.3	0	Low
883	TCGA.28.1746	0.736	-1.21608	0.44825	TCGA Agilent	0.2	0	Low
884	TCGA.28.1747	4.24862	0.506769	0.53175	TCGA Agilent	2.5	1	High
885	TCGA.28.1749	5.26312	0.389231	2.61575	TCGA Agilent	9.2	0	High
886	TCGA.28.1750	5.66062	-0.175	1.32563	TCGA Agilent	8.3	0	High
887	TCGA.28.1751	5.12175	0.156846	3.15112	TCGA Agilent	7.6	0	High
888	TCGA.28.1752	5.27975	0.276154	0.279875	TCGA Agilent	8.5	0	High
889	TCGA.28.1753	4.90475	-0.650077	2.23075	TCGA Agilent	1.2	0	High
890	TCGA.28.1755	5.80925	0.882154	3.22775	TCGA Agilent	1.6	1	High
891	TCGA.28.1756	2.97662	-0.725923	0.0255	TCGA Agilent	2.8	0	Low
892	TCGA.28.1757	5.4065	0.0266154	1.35112	TCGA Agilent	0.1	0	High
893	TCGA.28.1760	3.76225	0.182462	2.80138	TCGA Agilent	4.7	0	Low
894	TCGA.28.2501				TCGA Agilent			Low
895	TCGA.28.2502	5.44712	-0.220231	1.28913	TCGA Agilent	0.7	0	High
896	TCGA.28.2506	3.39438	-0.418385	1.7115	TCGA Agilent	6.7	0	Low
897	TCGA.28.2509	3.88325	-0.416385	1.00125	TCGA Agilent	4.8	0	Low
898	TCGA.28.2510				TCGA Agilent			Low
899	TCGA.28.2513	5.24937	-0.149923	1.52	TCGA Agilent	7.3	0	High
900	TCGA.28.2514	3.86013	-0.173077	2.785	TCGA Agilent	5.3	0	Low
901	TCGA.28.5204	3.83562	0.601538	1.7485	TCGA Agilent	14.9	1	Low
902	TCGA.28.5207	5.11825	0.904077	1.75513	TCGA Agilent	11.3	1	High
903	TCGA.28.5208	5.0195	-0.580769	2.43875	TCGA Agilent	17.9	1	High
904	TCGA.28.5209	6.15512	-0.384692	3.08712	TCGA Agilent	2.5	0	High
905	TCGA.28.5213	4.75	-0.474385	-0.54525	TCGA Agilent	31.3	0	High
906	TCGA.28.5214	3.61212	0.0756154	3.3495	TCGA Agilent	23.4	1	Low
907	TCGA.28.5215	4.22125	-0.565385	1.007	TCGA Agilent	11	1	High
908	TCGA.28.5216	4.9135	-0.694385	1.17312	TCGA Agilent	13.6	0	High
909	TCGA.28.5218	6.548	-1.23885	0.35925	TCGA Agilent	5.2	1	High
910	TCGA.28.5219	3.8595	-0.613846	1.6385	TCGA Agilent	22.7	0	Low
911	TCGA.28.5220	7.14787	-0.565538	-0.029875	TCGA Agilent	10.5	0	High
912	TCGA.28.6450				TCGA Agilent	5.4	1	Low
913	TCGA.32.1970	4.29175	-0.248769	1.7875	TCGA Agilent	15.4	1	High
914	TCGA.32.1973	2.42475	-0.018	3.3465	TCGA Agilent	21.1	1	Low
915	TCGA.32.1976	5.26513	0.0763077	1.921	TCGA Agilent	0.5	1	High
916	TCGA.32.1977	5.15813	0.332462	2.33363	TCGA Agilent	0.1	0	High
917	TCGA.32.1978	2.1985	0.695462	2.66262	TCGA Agilent	15.8	1	Low
918	TCGA.32.1979				TCGA Agilent	19.5	1	Low
919	TCGA.32.1980				TCGA Agilent	1.2	1	Low
920	TCGA.32.1982	7.24287	-0.562462	1.70263	TCGA Agilent	4.7	1	High
921	TCGA.32.1986	4.32388	-0.0237692	2.82325	TCGA Agilent	12.7	1	High
922	TCGA.32.1987	3.32088	-0.467769	1.11512	TCGA Agilent	14.9	1	Low
923	TCGA.32.1991	5.22687	1.12146	1.32475	TCGA Agilent	16.9	1	High
924	TCGA.32.2491	4.694	-0.523	2.23188	TCGA Agilent	12.2	1	High
925	TCGA.32.2494	4.291	0.145538	2.3965	TCGA Agilent	20.8	1	High
926	TCGA.32.2495	2.3995	-0.00853846	1.51937	TCGA Agilent	15	1	Low
927	TCGA.32.2615	3.78337	0.199308	2.30337	TCGA Agilent	15.9	1	Low
928	TCGA.32.2616	1.907	0.082	1.49925	TCGA Agilent	7.4	1	Low
929	TCGA.32.2632	5.75325	0.385615	3.127	TCGA Agilent	8.8	1	High
930	TCGA.32.2634	3.77025	-0.622846	1.16637	TCGA Agilent	22.8	0	Low
931	TCGA.32.2638	3.36	-0.468769	3.38963	TCGA Agilent	25.2	1	Low
932	TCGA.32.4208	1.75063	-1.20469	2.77237	TCGA Agilent	21.1	0	Low
933	TCGA.32.4209	5.74975	-1.33246	1.296	TCGA Agilent	20.3	1	High
934	TCGA.32.4210	3.71362	-1.64692	1.069	TCGA Agilent	3.7	1	Low
935	TCGA.32.4211	5.83387	0.729308	1.40225	TCGA Agilent	12.6	1	High
936	TCGA.32.4213	7.21988	-0.168385	1.72263	TCGA Agilent	19.9	0	High
937	TCGA.32.4719	1.71588	0.145308	0.04625	TCGA Agilent	10.8	1	Low
938	TCGA.32.5222	6.14375	0.251462	2.70175	TCGA Agilent	19.2	1	High
939	TCGA.41.2571	1.71538	-0.840538	0.778625	TCGA Agilent	0.8	1	Low
940	TCGA.41.2572	3.71937	0.443231	3.00963	TCGA Agilent	13.3	1	Low
941	TCGA.41.2573	2.9955	-1.01238	0.468375	TCGA Agilent	8.9	0	Low
942	TCGA.41.2575	4.213	0.728615	1.6085	TCGA Agilent	9.5	1	High
943	TCGA.41.3392	2.68662	0.785154	1.34575	TCGA Agilent	1	1	Low
944	TCGA.41.3393	3.86362	-0.975692	2.562	TCGA Agilent	4.4	1	Low
945	TCGA.41.3915	4.064	0.140923	0.922125	TCGA Agilent	11.8	1	High
946	TCGA.41.4097	4.26425	-1.13608	2.01762	TCGA Agilent	0.2	1	High
947	TCGA.41.5651				TCGA Agilent	15.1	1	Low
948	TCGA.76.4925	3.05262	1.259	3.56062	TCGA Agilent	4.8	1	Low
949	TCGA.76.4926	4.00087	0.245	0.4015	TCGA Agilent	4.5	1	High
950	TCGA.76.4927	4.039	-0.451385	1.418	TCGA Agilent	17.6	1	High
951	TCGA.76.4928	4.77412	-0.877615	1.55812	TCGA Agilent	3.1	1	High
952	TCGA.76.4929	4.93225	-0.346692	0.586125	TCGA Agilent	3.6	1	High
953	TCGA.76.4931	4.92075	-0.222692	1.8	TCGA Agilent	9.2	1	High
954	TCGA.76.4932	5.83287	0.0596923	2.15987	TCGA Agilent	47.9	1	High
955	TCGA.76.4934	2.74162	-0.968077	1.66712	TCGA Agilent	2.5	1	Low
956	TCGA.76.4935	3.43975	-0.590231	1.73188	TCGA Agilent	36.9	1	Low
957	TCGA.76.6191				TCGA Agilent	16.7	1	Low
958	TCGA.76.6192				TCGA Agilent	3.3	1	Low
959	TCGA.76.6193				TCGA Agilent	2.7	1	Low
960	TCGA.76.6282				TCGA Agilent	17.1	1	Low
961	TCGA.76.6285				TCGA Agilent	8.3	1	Low
962	TCGA.81.5910				TCGA Agilent	1.6	1	Low
963	TCGA.87.5896				TCGA Agilent	26.3	0	Low
964	TCGA.02.0001	6.4821	6.0305	6.251	TCGA Affymetrix	11.8	1	High
965	TCGA.02.0003	7.0416	7.4684	8.3299	TCGA Affymetrix	4.7	1	High
966	TCGA.02.0004	9.253	7.5092	8.248	TCGA Affymetrix	11.3	1	High
967	TCGA.02.0007	4.5234	8.327	6.1844	TCGA Affymetrix	23.2	1	Low
968	TCGA.02.0009	7.2842	8.9618	7.8046	TCGA Affymetrix	10.6	1	High
969	TCGA.02.0010	8.9809	9.8678	10.0535	TCGA Affymetrix	35.4	1	High
970	TCGA.02.0011	5.133	6.8466	6.5862	TCGA Affymetrix	20.7	1	Low
971	TCGA.02.0014	4.6725	4.9569	7.3998	TCGA Affymetrix	82.6	1	Low
972	TCGA.02.0015	4.8672	8.4293	9.0978	TCGA Affymetrix	20.6	1	Low
973	TCGA.02.0016	6.3588	7.8522	9.8767	TCGA Affymetrix	87.1	1	High
974	TCGA.02.0021	4.4507	7.8202	8.3813	TCGA Affymetrix	77.7	1	Low
975	TCGA.02.0023	6.7057	7.9413	7.6557	TCGA Affymetrix	20.1	1	High
976	TCGA.02.0024	5.0294	7.8492	7.2469	TCGA Affymetrix	53.1	1	Low
977	TCGA.02.0025	4.3316	5.3915	7.1874	TCGA Affymetrix	42.7	1	Low
978	TCGA.02.0026	4.2074	7.301	7.3946	TCGA Affymetrix	24.6	1	Low
979	TCGA.02.0027	7.0613	8.2546	7.0424	TCGA Affymetrix	12.2	1	High
980	TCGA.02.0028	6.878	7.3613	7.2606	TCGA Affymetrix	90.6	1	High
981	TCGA.02.0033	6.1626	7.6574	8.2259	TCGA Affymetrix	2.8	1	Low
982	TCGA.02.0034	7.2019	8.6626	7.221	TCGA Affymetrix	14.1	1	High
983	TCGA.02.0038	5.1816	5.4855	4.843	TCGA Affymetrix	10.7	1	Low
984	TCGA.02.0039	4.9955	8.2881	8.9443	TCGA Affymetrix	10.5	1	Low
985	TCGA.02.0043	8.7325	8.2534	7.8984	TCGA Affymetrix	18.3	1	High
986	TCGA.02.0046	5.9032	6.9433	9.9709	TCGA Affymetrix	6.9	1	Low
987	TCGA.02.0047	5.5645	7.6329	5.8864	TCGA Affymetrix	14.7	1	Low
988	TCGA.02.0048	6.728	8.2161	9.3603	TCGA Affymetrix	3.2	1	High
989	TCGA.02.0051	6.2481	6.8139	6.9717	TCGA Affymetrix	15.1	1	Low
990	TCGA.02.0052	7.784	7.6771	7.7152	TCGA Affymetrix	12.6	1	High
991	TCGA.02.0054	6.8304	7.9464	6.7784	TCGA Affymetrix	6.5	1	High
992	TCGA.02.0057	7.5332	7.593	8.1258	TCGA Affymetrix	19.9	1	High
993	TCGA.02.0058	6.3499	8.0315	7.5371	TCGA Affymetrix	8.3	1	High
994	TCGA.02.0059	7.1118	7.5491	8.1508	TCGA Affymetrix	9.6	1	High
995	TCGA.02.0060	8.12	8.8674	7.1067	TCGA Affymetrix	6	1	High
996	TCGA.02.0064	6.3815	8.0562	8.7721	TCGA Affymetrix	19.7	1	High
997	TCGA.02.0068	6.0818	8.4835	8.5192	TCGA Affymetrix	26.4	1	Low
998	TCGA.02.0069	7.3659	6.7553	8.808	TCGA Affymetrix	28.7	0	High
999	TCGA.02.0070	7.0137	8.8845	8.276	TCGA Affymetrix	25.1	0	High
1000	TCGA.02.0071	6.3497	8.6718	9.0402	TCGA Affymetrix	5.5	1	High
1001	TCGA.02.0074	6.0899	6.5709	8.1099	TCGA Affymetrix	10.2	1	Low
1002	TCGA.02.0075	5.8879	7.7909	9.028	TCGA Affymetrix	20.8	1	Low
1003	TCGA.02.0079	5.346	7.8258	6.5199	TCGA Affymetrix	27.2	1	Low
1004	TCGA.02.0080	4.5983	8.3343	7.7686	TCGA Affymetrix	89.7	1	Low
1005	TCGA.02.0083	7.3478	7.2157	9.2795	TCGA Affymetrix	22.7	1	High
1006	TCGA.02.0084	5.1186	6.6151	8.3934	TCGA Affymetrix	12.6	1	Low
1007	TCGA.02.0085	7.4049	7.8517	6.7883	TCGA Affymetrix	51.3	1	High
1008	TCGA.02.0086	5.0445	7.9938	9.3077	TCGA Affymetrix	8.8	1	Low
1009	TCGA.02.0087	5.1469	7.8037	7.7798	TCGA Affymetrix	57.8	0	Low
1010	TCGA.02.0089	7.0577	7.6497	8.6386	TCGA Affymetrix	17	1	High
1011	TCGA.02.0099	7.1983	8.6666	8.2662	TCGA Affymetrix	3.5	1	High
1012	TCGA.02.0102	8.1651	8.3594	8.9528	TCGA Affymetrix	27	1	High
1013	TCGA.02.0104	4.1307	6.6982	7.7368	TCGA Affymetrix	65	1	Low
1014	TCGA.02.0106	7.0967	7.0456	8.9048	TCGA Affymetrix	11.7	1	High
1015	TCGA.02.0107	7.2251	7.0746	7.9321	TCGA Affymetrix	17.6	1	High
1016	TCGA.02.0111	4.8664	7.6303	8.6337	TCGA Affymetrix	23.2	1	Low
1017	TCGA.02.0113	4.1012	8.3869	8.5074	TCGA Affymetrix	92.7	0	Low
1018	TCGA.02.0114	5.0562	6.6972	7.7798	TCGA Affymetrix	100	1	Low
1019	TCGA.02.0115	6.2632	8.1662	8.8775	TCGA Affymetrix	15.7	1	Low
1020	TCGA.02.0116	3.7129	8.0142	7.3214	TCGA Affymetrix	49	1	Low
1021	TCGA.02.0258	4.2901	7.8476	6.4749	TCGA Affymetrix	16.5	1	Low
1022	TCGA.02.0260	6.4805	8.5073	8.9478	TCGA Affymetrix	16.9	1	High
1023	TCGA.02.0266	6.4954	8.0769	9.003	TCGA Affymetrix	17.7	1	High
1024	TCGA.02.0269	8.662	9.1213	9.851	TCGA Affymetrix	10.8	1	High
1025	TCGA.02.0271	5.3389	7.6396	7.7397	TCGA Affymetrix	14.5	1	Low
1026	TCGA.02.0281	5.0761	7.8289	8.8743	TCGA Affymetrix	4	1	Low
1027	TCGA.02.0285	7.6581	8.5945	8.9763	TCGA Affymetrix	13.9	1	High
1028	TCGA.02.0289	8.2467	8.4775	9.313	TCGA Affymetrix	14.2	1	High
1029	TCGA.02.0290	8.8181	8.1045	9.4625	TCGA Affymetrix	15.9	1	High
1030	TCGA.02.0317	6.2535	8.0431	8.4572	TCGA Affymetrix	12.2	1	Low
1031	TCGA.02.0321	7.7225	8.0565	7.5116	TCGA Affymetrix	9.9	1	High
1032	TCGA.02.0324	6.549	8.0928	7.4734	TCGA Affymetrix	7.7	1	High
1033	TCGA.02.0325	6.2431	7.7061	6.7642	TCGA Affymetrix	10.6	1	Low
1034	TCGA.02.0326	4.8451	8.0057	7.837	TCGA Affymetrix	7.3	1	Low
1035	TCGA.02.0330	7.3257	7.8079	6.6135	TCGA Affymetrix	15.9	1	High
1036	TCGA.02.0332	4.6948	7.6088	8.9137	TCGA Affymetrix	25.7	1	Low
1037	TCGA.02.0333	5.5782	7.9843	9.3974	TCGA Affymetrix	4.4	1	Low
1038	TCGA.02.0337	6.4392	7.3021	7.9355	TCGA Affymetrix	25.1	1	High
1039	TCGA.02.0338	4.1464	6.5909	8.8111	TCGA Affymetrix	10.6	1	Low
1040	TCGA.02.0339	3.876	7.3511	9.0088	TCGA Affymetrix	12.4	1	Low
1041	TCGA.02.0422	7.1446	8.1929	8.6011	TCGA Affymetrix	14.5	1	High
1042	TCGA.02.0430	6.1169	8.2963	8.7113	TCGA Affymetrix	10.6	1	Low
1043	TCGA.02.0432	5.3359	6.2615	6.6971	TCGA Affymetrix	47.1	1	Low
1044	TCGA.02.0439	5.8889	8.0786	7.043	TCGA Affymetrix	0.7	1	Low
1045	TCGA.02.0440	5.4944	7.8552	7.5187	TCGA Affymetrix	11.3	1	Low
1046	TCGA.02.0446	6.892	6.8034	6.7424	TCGA Affymetrix	9.3	1	High
1047	TCGA.02.0451	9.2219	8.055	7.3658	TCGA Affymetrix	16.2	1	High
1048	TCGA.02.0456	5.9881	6.7701	6.3817	TCGA Affymetrix	3.4	1	Low
1049	TCGA.02.2466	5.4061	7.1892	7.5236	TCGA Affymetrix	16.8	1	Low
1050	TCGA.02.2470	7.7352	7.4675	7.6312	TCGA Affymetrix	12.9	1	High
1051	TCGA.02.2483	4.7977	6.8457	8.7976	TCGA Affymetrix	15.3	0	Low
1052	TCGA.02.2485	5.3077	9.4526	9.1876	TCGA Affymetrix	15.4	0	Low
1053	TCGA.02.2486	5.8453	7.9333	7.0497	TCGA Affymetrix	20.3	1	Low
1054	TCGA.06.0122	7.4429	8.0347	8.6774	TCGA Affymetrix	6.2	1	High
1055	TCGA.06.0124	8.2574	7.6564	9.0236	TCGA Affymetrix	20.4	1	High
1056	TCGA.06.0125	6.6817	8.2525	9.6238	TCGA Affymetrix	47.6	1	High
1057	TCGA.06.0126	7.0525	8.3802	10.1664	TCGA Affymetrix	6.9	1	High
1058	TCGA.06.0127	6.2768	7.8513	8.8618	TCGA Affymetrix	4	1	Low
1059	TCGA.06.0128	5.6054	7.0041	7.3812	TCGA Affymetrix	22.7	1	Low
1060	TCGA.06.0129	4.6817	6.8259	8.2354	TCGA Affymetrix	33.7	1	Low
1061	TCGA.06.0130	7.0701	7.3886	9.0847	TCGA Affymetrix	12.9	1	High
1062	TCGA.06.0132	6.9862	6.8875	6.543	TCGA Affymetrix	25.4	1	High
1063	TCGA.06.0133	8.0743	8.0015	7.0309	TCGA Affymetrix	14.3	1	High
1064	TCGA.06.0137	6.6693	7.7739	9.6771	TCGA Affymetrix	26.7	1	High
1065	TCGA.06.0138	5.9572	8.296	8.3212	TCGA Affymetrix	24.2	1	Low
1066	TCGA.06.0139	6.4174	5.9974	7.2142	TCGA Affymetrix	11.9	1	High
1067	TCGA.06.0140	6.3754	8.9337	6.7395	TCGA Affymetrix	0.2	1	High
1068	TCGA.06.0141	7.0418	6.9876	7.2542	TCGA Affymetrix	10.3	1	High
1069	TCGA.06.0142	5.37	6.4915	6.4008	TCGA Affymetrix	2.2	1	Low
1070	TCGA.06.0143	10.3272	7.8386	8.1607	TCGA Affymetrix	11.7	1	High
1071	TCGA.06.0145	5.5058	8.0544	9.1194	TCGA Affymetrix	2.3	1	Low
1072	TCGA.06.0146	4.8024	6.4853	7.28	TCGA Affymetrix	20.1	1	Low
1073	TCGA.06.0147	7.2556	6.7385	8.2452	TCGA Affymetrix	17.8	1	High
1074	TCGA.06.0148	6.8704	8.31	8.6417	TCGA Affymetrix	10.1	1	High
1075	TCGA.06.0149	6.913	8.2265	7.9586	TCGA Affymetrix	8.6	1	High
1076	TCGA.06.0152	4.9809	8.1651	9.0699	TCGA Affymetrix	12.3	1	Low
1077	TCGA.06.0154	7.5124	7.8758	8.9071	TCGA Affymetrix	13.9	1	High
1078	TCGA.06.0155	10.8168	7.5815	7.6078	TCGA Affymetrix	10.4	1	High
1079	TCGA.06.0156	7.2059	7.5115	7.4384	TCGA Affymetrix	5.8	1	High
1080	TCGA.06.0157	7.4929	8.6964	9.392	TCGA Affymetrix	3.2	1	High
1081	TCGA.06.0158	5.4594	8.3488	8.3268	TCGA Affymetrix	10.8	1	Low
1082	TCGA.06.0160	4.6363	6.2516	5.6097	TCGA Affymetrix	11.8	1	Low
1083	TCGA.06.0162	7.2529	7.63	6.404	TCGA Affymetrix	3.4	1	High
1084	TCGA.06.0164	6.7344	7.4188	8.9477	TCGA Affymetrix	56.9	1	High
1085	TCGA.06.0166	4.6777	7.5707	8.1448	TCGA Affymetrix	5.8	1	Low
1086	TCGA.06.0167	5.3809	7.0517	5.5191	TCGA Affymetrix	11.4	1	Low
1087	TCGA.06.0168	4.7224	7.7908	7.6135	TCGA Affymetrix	19.7	1	Low
1088	TCGA.06.0169	7.0717	7.2646	8.4343	TCGA Affymetrix	3.3	1	High
1089	TCGA.06.0171	5.4461	7.9957	8.1234	TCGA Affymetrix	13.1	1	Low
1090	TCGA.06.0173	5.5038	8.0215	7.7122	TCGA Affymetrix	4.5	1	Low
1091	TCGA.06.0174	5.9877	8.2851	8.0596	TCGA Affymetrix	3.2	1	Low
1092	TCGA.06.0175	5.415	7.8585	9.4101	TCGA Affymetrix	4	1	Low
1093	TCGA.06.0176	4.366	7.7473	8.1587	TCGA Affymetrix	91	0	Low
1094	TCGA.06.0177	7.1884	6.0279	7.111	TCGA Affymetrix	4.2	1	High
1095	TCGA.06.0178	5.4476	6.7863	7.975	TCGA Affymetrix	88.1	1	Low
1096	TCGA.06.0179	6.8953	7.1832	8.123	TCGA Affymetrix	20.2	1	High
1097	TCGA.06.0182	6.439	8.5645	8.8617	TCGA Affymetrix	3.6	1	High
1098	TCGA.06.0184	5.3132	7.458	7.9713	TCGA Affymetrix	69.9	1	Low
1099	TCGA.06.0185	6.2053	8.4251	7.6803	TCGA Affymetrix	73.8	0	Low
1100	TCGA.06.0187	6.7903	9.1069	8.8082	TCGA Affymetrix	27.2	1	High
1101	TCGA.06.0188	6.0744	7.5465	7.1766	TCGA Affymetrix	44.6	1	Low
1102	TCGA.06.0189	7.2913	7.9733	8.5558	TCGA Affymetrix	15.4	1	High
1103	TCGA.06.0190	7.9164	7.9386	8.4245	TCGA Affymetrix	10.4	1	High
1104	TCGA.06.0192	5.3092	8.0378	9.2128	TCGA Affymetrix	39	1	Low
1105	TCGA.06.0194	7.0469	7.7901	7.6245	TCGA Affymetrix	4.7	1	High
1106	TCGA.06.0195	5.0552	9.2696	8.1548	TCGA Affymetrix	7.4	1	Low
1107	TCGA.06.0197	6.224	7.2932	8.1916	TCGA Affymetrix	5.6	1	Low
1108	TCGA.06.0201	5.3902	7.0789	7.4854	TCGA Affymetrix	0.4	1	Low
1109	TCGA.06.0206	8.178	6.7407	8.5809	TCGA Affymetrix	7.7	1	High
1110	TCGA.06.0208	6.0948	8.0927	8.6066	TCGA Affymetrix	8.4	1	Low
1111	TCGA.06.0210	9.402	8.1636	8.5234	TCGA Affymetrix	7.4	1	High
1112	TCGA.06.0211	6.4421	7.5601	9.1621	TCGA Affymetrix	11.8	1	High
1113	TCGA.06.0213	5.7353	7.7789	7.3144	TCGA Affymetrix	0.5	1	Low
1114	TCGA.06.0214	6.2798	8.4009	8.7978	TCGA Affymetrix	15	1	Low
1115	TCGA.06.0216	6.0075	7.8906	7.6123	TCGA Affymetrix	24.2	1	Low
1116	TCGA.06.0219	6.7111	7.4385	7.5537	TCGA Affymetrix	0.7	1	High
1117	TCGA.06.0221	4.6788	6.3955	7.8287	TCGA Affymetrix	19.8	1	Low
1118	TCGA.06.0237	6.9926	8.3394	7.2279	TCGA Affymetrix	13.6	1	High
1119	TCGA.06.0238	5.7531	6.6201	7.1643	TCGA Affymetrix	13.3	1	Low
1120	TCGA.06.0240	5.2549	7.097	5.883	TCGA Affymetrix	20.4	1	Low
1121	TCGA.06.0241	5.3938	7.7873	8.0167	TCGA Affymetrix	48.7	1	Low
1122	TCGA.06.0394	5.6839	7.4862	9.2963	TCGA Affymetrix	10.8	1	Low
1123	TCGA.06.0397	4.9032	6.5035	6.9699	TCGA Affymetrix	9	1	Low
1124	TCGA.06.0402	7.5696	7.9991	10.2654	TCGA Affymetrix	0.3	1	High
1125	TCGA.06.0409	5.4294	7.8634	8.2608	TCGA Affymetrix	72.4	1	Low
1126	TCGA.06.0410	5.2037	7.5187	8.3929	TCGA Affymetrix	4.7	1	Low
1127	TCGA.06.0412	11.0147	8.4545	8.38	TCGA Affymetrix	9.6	1	High
1128	TCGA.06.0413	4.7192	7.9846	7.5983	TCGA Affymetrix	3.2	1	Low
1129	TCGA.06.0414	4.8378	6.961	7.2517	TCGA Affymetrix	35.1	1	Low
1130	TCGA.06.0644	6.9455	6.3665	9.387	TCGA Affymetrix	12.6	1	High
1131	TCGA.06.0645	6.4481	7.8606	8.8621	TCGA Affymetrix	5.8	1	High
1132	TCGA.06.0646	5.6785	8.3842	8.8138	TCGA Affymetrix	5.8	1	Low
1133	TCGA.06.0648	6.8058	7.2471	7.1482	TCGA Affymetrix	9.8	1	High
1134	TCGA.06.0649	6.6044	6.5364	6.6072	TCGA Affymetrix	2.1	1	High
1135	TCGA.06.0650	6.502	8.2258	9.2372	TCGA Affymetrix	23.6	1	High
1136	TCGA.06.0686	4.8298	7.2781	6.7537	TCGA Affymetrix	14.2	1	Low
1137	TCGA.06.0743	7.4061	8.0752	8.6099	TCGA Affymetrix	26.4	1	High
1138	TCGA.06.0744	5.6636	8.0674	8.9801	TCGA Affymetrix	46.9	1	Low
1139	TCGA.06.0745	7.0343	7.3711	8.6273	TCGA Affymetrix	7.9	1	High
1140	TCGA.06.0747	5.0837	7.7392	8.2402	TCGA Affymetrix	2.7	1	Low
1141	TCGA.06.0749	6.7984	7.8631	6.0659	TCGA Affymetrix	2.7	1	High
1142	TCGA.06.0750	9.1915	7.6887	8.175	TCGA Affymetrix	0.9	1	High
1143	TCGA.06.0875	4.3537	7.3174	7.3916	TCGA Affymetrix	43.5	0	Low
1144	TCGA.06.0876	7.2058	8.2922	7.7241	TCGA Affymetrix	46.2	0	High
1145	TCGA.06.0877	7.8471	7.2092	8.453	TCGA Affymetrix	5.7	1	High
1146	TCGA.06.0878	6.5544	8.2542	8.4528	TCGA Affymetrix	7.2	0	High
1147	TCGA.06.0879	5.3547	8.6918	7.733	TCGA Affymetrix	40.4	1	Low
1148	TCGA.06.0881	6.1908	6.7509	7.3312	TCGA Affymetrix	16.6	1	Low
1149	TCGA.06.0882	7.5255	8.5293	7.9788	TCGA Affymetrix	20.8	1	High
1150	TCGA.06.0939	5.6991	7.6774	7.5931	TCGA Affymetrix	26.8	1	Low
1151	TCGA.06.1084	7.8401	7.3459	8.3827	TCGA Affymetrix	23.9	1	High
1152	TCGA.06.1086	6.2687	9.4805	10.1621	TCGA Affymetrix	6.8	1	Low
1153	TCGA.06.1087	6.9318	6.0724	7.3092	TCGA Affymetrix	4	1	High
1154	TCGA.06.1800	7.7541	6.7243	8.0048	TCGA Affymetrix	26.8	1	High
1155	TCGA.06.1801	5.2848	7.3511	7.5957	TCGA Affymetrix	11.8	1	Low
1156	TCGA.06.1802	5.3706	8.3353	8.559	TCGA Affymetrix	15.3	1	Low
1157	TCGA.06.1804	7.7904	8.6183	7.1542	TCGA Affymetrix	13.6	1	High
1158	TCGA.06.1805	4.8112	7.3776	7.1169	TCGA Affymetrix	33.9	0	Low
1159	TCGA.06.2557	8.3909	8.62	10.036	TCGA Affymetrix	1.1	1	High
1160	TCGA.06.2558	5.6147	8.0262	7.6929	TCGA Affymetrix	12.5	1	Low
1161	TCGA.06.2559	7.4148	9.0051	9.161	TCGA Affymetrix	4.9	1	High
1162	TCGA.06.2561	8.0712	7.7452	8.0348	TCGA Affymetrix	17.6	1	High
1163	TCGA.06.2562	6.4554	7.3636	9.9746	TCGA Affymetrix	12.6	1	High
1164	TCGA.06.2563	6.0786	8.1971	9.7084	TCGA Affymetrix	30.6	0	Low
1165	TCGA.06.2564	6.6471	8.1566	8.584	TCGA Affymetrix	6	0	High
1166	TCGA.06.2565	7.667	8.4556	10.2345	TCGA Affymetrix	16.6	1	High
1167	TCGA.06.2566	4.9469	7.2479	8.4271	TCGA Affymetrix	6	1	Low
1168	TCGA.06.2567	7.7194	9.0238	7.1412	TCGA Affymetrix	4.4	1	High
1169	TCGA.06.2569	9.4962	9.2542	7.5674	TCGA Affymetrix	0.4	0	High
1170	TCGA.06.2570	3.8885	6.9656	8.4172	TCGA Affymetrix	31.5	0	Low
1171	TCGA.06.5408	8.2763	8.1881	9.2853	TCGA Affymetrix	11.7	1	High
1172	TCGA.06.5410	6.7575	7.4232	7.7633	TCGA Affymetrix	3.5	1	High
1173	TCGA.06.5411	5.5687	7.7959	7.7419	TCGA Affymetrix	8.3	1	Low
1174	TCGA.06.5412	8.3276	7.3458	8.4336	TCGA Affymetrix	4.5	1	High
1175	TCGA.06.5413	7.8432	8.2652	8.6182	TCGA Affymetrix	8.8	0	High
1176	TCGA.06.5414	5.8134	8.0917	8.719	TCGA Affymetrix	9	0	Low
1177	TCGA.06.5415	6.8734	7.8607	9.1726	TCGA Affymetrix	8.6	0	High
1178	TCGA.06.5416	8.4767	7.0877	9.2369	TCGA Affymetrix	6.7	0	High
1179	TCGA.06.5417	4.3277	6.8461	8.789	TCGA Affymetrix	5.1	0	Low
1180	TCGA.06.5418	6.4999	7.9225	8.5737	TCGA Affymetrix	2.7	1	High
1181	TCGA.06.5856	6.7192	7.9326	9.9102	TCGA Affymetrix	3.8	1	High
1182	TCGA.06.5858	5.577	8.2675	8.9679	TCGA Affymetrix	6.2	0	Low
1183	TCGA.06.5859	6.096	8.3907	7.9845	TCGA Affymetrix	4.6	0	Low
1184	TCGA.06.6389	5.3057	7.2493	7.4739	TCGA Affymetrix	7.8	0	Low
1185	TCGA.06.6390	5.3931	8.0179	9.2314	TCGA Affymetrix	5.4	1	Low
1186	TCGA.06.6391	3.9819	7.4215	10.2512	TCGA Affymetrix	1.5	1	Low
1187	TCGA.08.0244	6.3332	7.7353	7.9525	TCGA Affymetrix	22.7	1	High
1188	TCGA.08.0245	3.835	7.825	8.119	TCGA Affymetrix	37.8	1	Low
1189	TCGA.08.0246	8.6341	8.7153	8.7653	TCGA Affymetrix	4.2	1	High
1190	TCGA.08.0344	4.5103	6.4079	6.458	TCGA Affymetrix	115.9	1	Low
1191	TCGA.08.0345	6.0349	7.8211	6.7388	TCGA Affymetrix	1.7	1	Low
1192	TCGA.08.0346	7.7046	7.3861	7.7584	TCGA Affymetrix	8.4	1	High
1193	TCGA.08.0347	7.0854	7.4286	7.2153	TCGA Affymetrix	25.7	1	High
1194	TCGA.08.0348	4.9451	7.5981	7.2131	TCGA Affymetrix	12.2	1	Low
1195	TCGA.08.0349	6.8514	8.324	7.9113	TCGA Affymetrix	9.8	1	High
1196	TCGA.08.0350	5.3991	7.3121	7.7604	TCGA Affymetrix	29.2	1	Low
1197	TCGA.08.0351	4.8944	6.7186	7.0848	TCGA Affymetrix	65.3	1	Low
1198	TCGA.08.0352	7.7439	7.8881	9.3087	TCGA Affymetrix	1.3	1	High
1199	TCGA.08.0353	7.4106	8.3018	9.038	TCGA Affymetrix	8.4	1	High
1200	TCGA.08.0354	7.0624	8.3198	7.912	TCGA Affymetrix	17.9	1	High
1201	TCGA.08.0355	9.462	8.0792	8.2826	TCGA Affymetrix	24.6	1	High
1202	TCGA.08.0356	7.35	8.5515	9.8416	TCGA Affymetrix	31.1	1	High
1203	TCGA.08.0357	7.9995	8.2571	8.546	TCGA Affymetrix	37.6	1	High
1204	TCGA.08.0358	5.6432	8.7187	8.7221	TCGA Affymetrix	22.3	1	Low
1205	TCGA.08.0359	5.2105	7.7227	7.6579	TCGA Affymetrix	3.4	1	Low
1206	TCGA.08.0360	6.7155	7.6194	6.9273	TCGA Affymetrix	15.4	1	High
1207	TCGA.08.0373	7.583	8.0328	7.1964	TCGA Affymetrix	4.4	1	High
1208	TCGA.08.0375	4.6264	7.8821	8.7823	TCGA Affymetrix	12.2	1	Low
1209	TCGA.08.0380	6.098	8.0944	6.1284	TCGA Affymetrix	14.9	1	Low
1210	TCGA.08.0385	5.933	6.9569	8.2968	TCGA Affymetrix	2.7	1	Low
1211	TCGA.08.0386	6.15	8.415	6.8995	TCGA Affymetrix	18	1	Low
1212	TCGA.08.0389	6.1003	8.3037	7.8216	TCGA Affymetrix	15.3	1	Low
1213	TCGA.08.0390	6.8446	6.3017	7.5401	TCGA Affymetrix	14	1	High
1214	TCGA.08.0392	6.126	6.383	9.9984	TCGA Affymetrix	0.7	1	Low
1215	TCGA.08.0509	7.431	7.2903	8.2834	TCGA Affymetrix	12.6	1	High
1216	TCGA.08.0510	7.6021	8.0106	8.5963	TCGA Affymetrix	4.3	1	High
1217	TCGA.08.0511	6.0821	8.3502	10.1086	TCGA Affymetrix	7.7	1	Low
1218	TCGA.08.0512	7.858	7.8301	7.9879	TCGA Affymetrix	42.1	1	High
1219	TCGA.08.0514	6.8931	8.3195	9.3732	TCGA Affymetrix	11.1	1	High
1220	TCGA.08.0516	5.6606	8.1482	9.1221	TCGA Affymetrix	19.6	1	Low
1221	TCGA.08.0517	5.1098	7.7926	7.7821	TCGA Affymetrix	58.7	1	Low
1222	TCGA.08.0518	9.6579	8.4677	8.6293	TCGA Affymetrix	19.3	1	High
1223	TCGA.08.0520	6.2524	7.5319	6.8588	TCGA Affymetrix	10.8	1	Low
1224	TCGA.08.0521	4.5025	6.9296	8.728	TCGA Affymetrix	4.8	1	Low
1225	TCGA.08.0522	5.5439	6.9636	7.4573	TCGA Affymetrix	20.9	1	Low
1226	TCGA.08.0524	4.5485	5.8358	7.846	TCGA Affymetrix	7.3	1	Low
1227	TCGA.08.0525	8.8045	8.2191	8.8263	TCGA Affymetrix	16	1	High
1228	TCGA.08.0529	8.2112	8.1415	8.5628	TCGA Affymetrix	18.4	1	High
1229	TCGA.08.0531	6.7388	8.0108	8.7424	TCGA Affymetrix	7.6	1	High
1230	TCGA.12.0616	5.575	7.5477	8.2132	TCGA Affymetrix	14.7	1	Low
1231	TCGA.12.0618	5.5506	6.639	8.1033	TCGA Affymetrix	13	1	Low
1232	TCGA.12.0619	7.2036	7.8258	7.471	TCGA Affymetrix	34.9	1	High
1233	TCGA.12.0620	5.2135	8.2781	9.1292	TCGA Affymetrix	10.4	1	Low
1234	TCGA.12.0654	8.0537	6.8594	7.6178	TCGA Affymetrix	7.6	1	High
1235	TCGA.12.0656	6.2766	7.8783	8.737	TCGA Affymetrix	94.8	1	Low
1236	TCGA.12.0657	5.4645	8.0984	7.3182	TCGA Affymetrix	0.1	1	Low
1237	TCGA.12.0670	4.7674	8.2259	7.0561	TCGA Affymetrix	26	1	Low
1238	TCGA.12.0688	6.3051	7.4494	8.7739	TCGA Affymetrix	26.7	1	High
1239	TCGA.12.0692	8.7997	7.9216	8.5421	TCGA Affymetrix	3.6	1	High
1240	TCGA.12.0703	8.4448	6.4385	8.0373	TCGA Affymetrix	20.4	1	High
1241	TCGA.12.0707	6.9432	8.4145	7.7435	TCGA Affymetrix	28.4	1	High
1242	TCGA.12.0772	5.1985	8.2605	7.3654	TCGA Affymetrix	53.9	1	Low
1243	TCGA.12.0773	4.6138	7.6141	7.539	TCGA Affymetrix	43.2	1	Low
1244	TCGA.12.0775	6.4349	7.3095	7.0392	TCGA Affymetrix	7.6	1	High
1245	TCGA.12.0776	6.7904	7.1729	7.3634	TCGA Affymetrix	9.7	1	High
1246	TCGA.12.0778	7.1984	7.6844	7.5737	TCGA Affymetrix	14.9	1	High
1247	TCGA.12.0780	5.7543	7.7715	8.4417	TCGA Affymetrix	14.9	1	Low
1248	TCGA.12.0818	5.1306	8.5968	6.9217	TCGA Affymetrix	91.8	1	Low
1249	TCGA.12.0819	5.7912	8.0894	8.8817	TCGA Affymetrix	24.8	1	Low
1250	TCGA.12.0820	4.5254	8.3278	8.1609	TCGA Affymetrix	18.5	1	Low
1251	TCGA.12.0821	7.0166	8.2788	8.6964	TCGA Affymetrix	10.6	1	High
1252	TCGA.12.0822	6.2835	7.5439	8.1073	TCGA Affymetrix	23.5	1	Low
1253	TCGA.12.0826	8.0995	7.9259	7.8559	TCGA Affymetrix	27.8	1	High
1254	TCGA.12.0827	4.8331	6.635	8.8177	TCGA Affymetrix	38.8	1	Low
1255	TCGA.12.0828	6.0936	7.5862	7.1231	TCGA Affymetrix	8.9	1	Low
1256	TCGA.12.0829	7.2405	7.711	6.8704	TCGA Affymetrix	20.6	1	High
1257	TCGA.12.1088	7.2104	8.1271	6.9217	TCGA Affymetrix	127.6	1	High
1258	TCGA.12.1089	5.8941	8.6765	6.9003	TCGA Affymetrix	5.8	1	Low
1259	TCGA.12.1090	7.1001	7.4336	6.878	TCGA Affymetrix	7.6	1	High
1260	TCGA.12.1091	9.1652	8.4335	8.1948	TCGA Affymetrix	33.2	1	High
1261	TCGA.12.1092	6.4171	7.3864	7.1644	TCGA Affymetrix	21.7	1	High
1262	TCGA.12.1093	7.1214	8.0306	6.6971	TCGA Affymetrix	16	1	High
1263	TCGA.12.1094	4.8648	7.8242	8.7275	TCGA Affymetrix	12.2	1	Low
1264	TCGA.12.1095	6.7845	6.9773	7.186	TCGA Affymetrix	15.8	1	High
1265	TCGA.12.1096	5.3323	7.7303	7.0247	TCGA Affymetrix	9.1	1	Low
1266	TCGA.12.1097	6.3217	8.1048	7.1667	TCGA Affymetrix	14.5	1	High
1267	TCGA.12.1098	5.7174	7.8791	7.1646	TCGA Affymetrix	4	1	Low
1268	TCGA.12.1099	5.2871	7.8972	6.6502	TCGA Affymetrix	4.1	1	Low
1269	TCGA.12.1597	4.9689	7.2551	8.6722	TCGA Affymetrix	22.2	1	Low
1270	TCGA.12.1598	8.4622	7.2771	6.8627	TCGA Affymetrix	15.7	1	High
1271	TCGA.12.1599	6.9216	7.8092	8.0929	TCGA Affymetrix	25.7	1	High
1272	TCGA.12.1600	4.8018	8.5936	8.9912	TCGA Affymetrix	14.7	1	Low
1273	TCGA.12.1602	6.9973	7.7199	7.0655	TCGA Affymetrix	6.8	1	High
1274	TCGA.12.3644	3.994	7.1397	7.2078	TCGA Affymetrix	59.8	1	Low
1275	TCGA.12.3646	4.3957	7.2803	6.6417	TCGA Affymetrix	44	1	Low
1276	TCGA.12.3648	6.0648	8.6832	10.0225	TCGA Affymetrix	26.9	1	Low
1277	TCGA.12.3649	6.846	7.288	8.5304	TCGA Affymetrix	15.2	1	High
1278	TCGA.12.3650	7.3499	8.2863	8.841	TCGA Affymetrix	10.9	1	High
1279	TCGA.12.3651	5.4672	6.9522	6.8821	TCGA Affymetrix	12.7	1	Low
1280	TCGA.12.3652	7.7682	8.2995	9.3946	TCGA Affymetrix	34.9	1	High
1281	TCGA.12.3653	4.1047	8.1641	8.5728	TCGA Affymetrix	14.5	1	Low
1282	TCGA.12.5295	4.8141	7.1554	8.0713	TCGA Affymetrix	14.9	1	Low
1283	TCGA.12.5299	6.1507	8.2747	9.3432	TCGA Affymetrix	3.2	1	Low
1284	TCGA.12.5301	7.807	7.9436	8.03	TCGA Affymetrix	2	1	High
1285	TCGA.14.0736	9.0021	8.323	6.9903	TCGA Affymetrix	15.1	1	High
1286	TCGA.14.0781	7.8485	7.9774	9.6648	TCGA Affymetrix	1	1	High
1287	TCGA.14.0783	6.7212	7.8882	8.5059	TCGA Affymetrix	6.2	1	High
1288	TCGA.14.0786	7.6114	8.2222	9.4645	TCGA Affymetrix	23.1	1	High
1289	TCGA.14.0787	6.3416	7.6693	8.4683	TCGA Affymetrix	2.2	1	High
1290	TCGA.14.0789	8.0264	7.86	8.6074	TCGA Affymetrix	11.2	1	High
1291	TCGA.14.0790	8.7984	8.8915	8.2619	TCGA Affymetrix	13.8	1	High
1292	TCGA.14.0812	5.8006	7.3049	6.3864	TCGA Affymetrix	3.2	1	Low
1293	TCGA.14.0813	8.1644	8.3245	7.2642	TCGA Affymetrix	1.4	1	High
1294	TCGA.14.0817	7.3008	8.1446	8.1703	TCGA Affymetrix	5.4	1	High
1295	TCGA.14.0865	4.8827	6.7868	7.9462	TCGA Affymetrix	16.5	1	Low
1296	TCGA.14.0866	6.7476	7.5753	9.4472	TCGA Affymetrix	26.3	1	High
1297	TCGA.14.0867	6.2337	7.2987	7.7113	TCGA Affymetrix	2	1	Low
1298	TCGA.14.0871	10.2168	8.4917	5.6186	TCGA Affymetrix	28.9	1	High
1299	TCGA.14.1034	6.5727	8.0556	6.9404	TCGA Affymetrix	15.9	1	High
1300	TCGA.14.1037	7.9028	7.8135	6.8473	TCGA Affymetrix	19.3	1	High
1301	TCGA.14.1396	6.2845	6.9693	7.882	TCGA Affymetrix	1.1	1	High
1302	TCGA.14.1401	8.261	7.907	7.3167	TCGA Affymetrix	3.8	1	High
1303	TCGA.14.1402	5.3378	7.8096	7.3127	TCGA Affymetrix	32	1	Low
1304	TCGA.14.1451	5.4945	8.1503	6.8468	TCGA Affymetrix	23.1	1	Low
1305	TCGA.14.1452	9.495	8.6461	8.4235	TCGA Affymetrix	7.1	1	High
1306	TCGA.14.1453	4.5662	8.365	8.9946	TCGA Affymetrix	1.1	1	Low
1307	TCGA.14.1454	4.477	6.9584	7.3462	TCGA Affymetrix	30.2	1	Low
1308	TCGA.14.1455	5.7615	8.1935	7.1276	TCGA Affymetrix	0.9	1	Low
1309	TCGA.14.1456	5.2413	6.988	7.5901	TCGA Affymetrix	41	0	Low
1310	TCGA.14.1458	4.2117	5.8366	6.5314	TCGA Affymetrix	6.7	1	Low
1311	TCGA.14.1459	8.102	7.6185	7.3129	TCGA Affymetrix	12.4	1	High
1312	TCGA.14.1794	6.9813	7.7475	7.7598	TCGA Affymetrix	1	1	High
1313	TCGA.14.1795	5.6817	7.0965	8.761	TCGA Affymetrix	2	1	Low
1314	TCGA.14.1821	4.4056	5.6014	7.9187	TCGA Affymetrix	17.8	1	Low
1315	TCGA.14.1823	8.1012	7.6837	7.3401	TCGA Affymetrix	17.9	1	High
1316	TCGA.14.1825	5.1784	6.6465	7.2297	TCGA Affymetrix	7.6	1	Low
1317	TCGA.14.1827	6.3748	7.8695	7.9356	TCGA Affymetrix	5.9	1	High
1318	TCGA.14.1829	6.6497	7.2901	7.6969	TCGA Affymetrix	7.2	0	High
1319	TCGA.14.2554	6.0336	8.5153	8.6028	TCGA Affymetrix	17.5	1	Low
1320	TCGA.14.2555	7.8109	8.1904	9.8055	TCGA Affymetrix	8	0	High
1321	TCGA.14.3476	6.2452	6.8034	7.3535	TCGA Affymetrix	0.4	1	Low
1322	TCGA.14.3477	4.9286	6.898	8.6783	TCGA Affymetrix	3.8	0	Low
1323	TCGA.14.4157	4.2971	5.0653	7.4638	TCGA Affymetrix	3.4	0	Low
1324	TCGA.15.0742	4.3527	8.1056	8.301	TCGA Affymetrix	13.8	1	Low
1325	TCGA.15.1444	4.059	8.385	8.1298	TCGA Affymetrix	50.5	1	Low
1326	TCGA.15.1446	6.7098	7.9424	6.4352	TCGA Affymetrix	19.1	0	High
1327	TCGA.15.1447	5.9071	6.8616	9.1115	TCGA Affymetrix	53.2	0	Low
1328	TCGA.15.1449	5.8496	6.9346	9.1681	TCGA Affymetrix	13.3	1	Low
1329	TCGA.16.0846	5.0693	6.9402	6.5025	TCGA Affymetrix	3.9	1	Low
1330	TCGA.16.0848	6.4459	7.7753	6.9515	TCGA Affymetrix	17.6	1	High
1331	TCGA.16.0849	3.8942	6.3384	7.4741	TCGA Affymetrix	26.1	0	Low
1332	TCGA.16.0850	3.8813	6.0921	7.6917	TCGA Affymetrix	16.4	1	Low
1333	TCGA.16.0861	7.3228	7.9275	7.6657	TCGA Affymetrix	4.3	0	High
1334	TCGA.16.1045	7.1949	7.9411	6.6684	TCGA Affymetrix	29	1	High
1335	TCGA.16.1047	7.4327	8.175	7.0647	TCGA Affymetrix	4.6	1	High
1336	TCGA.16.1048	8.3336	7.6109	9.6014	TCGA Affymetrix			High
1337	TCGA.16.1055	9.279	7.3077	8.6151	TCGA Affymetrix	10.3	1	High
1338	TCGA.16.1056	5.2509	8.8686	7.6216	TCGA Affymetrix	14	1	Low
1339	TCGA.16.1060	6.0297	7.6837	8.4701	TCGA Affymetrix	9.1	1	Low
1340	TCGA.16.1062	7.8064	8.3372	9.2335	TCGA Affymetrix	21.2	1	High
1341	TCGA.16.1063	7.1359	7.8094	8.0415	TCGA Affymetrix	14	1	High
1342	TCGA.16.1460	5.218	6.6682	7.3447	TCGA Affymetrix	6.4	0	Low
1343	TCGA.19.0955	5.2727	7.9642	7.7014	TCGA Affymetrix	11.8	0	Low
1344	TCGA.19.0957	4.75	6.4969	7.3037	TCGA Affymetrix	21.9	1	Low
1345	TCGA.19.0960	4.9699	7.6758	7.78	TCGA Affymetrix	8.6	0	Low
1346	TCGA.19.0962	7.3771	8.4878	6.7502	TCGA Affymetrix	0.7	1	High
1347	TCGA.19.0963	5.9456	7.2828	6.7544	TCGA Affymetrix	14.3	1	Low
1348	TCGA.19.0964	4.5039	7.876	7.1248	TCGA Affymetrix	3.4	0	Low
1349	TCGA.19.1385	8.477	8.2584	7.6878	TCGA Affymetrix	10.8	1	High
1350	TCGA.19.1386	6.6258	8.5945	9.4758	TCGA Affymetrix	9.1	1	High
1351	TCGA.19.1387	6.066	7.2074	6.5371	TCGA Affymetrix	6	0	Low
1352	TCGA.19.1388	4.8971	7.4558	9.4729	TCGA Affymetrix	12.9	1	Low
1353	TCGA.19.1389	7.482	7.8697	8.1059	TCGA Affymetrix	4.6	1	High
1354	TCGA.19.1390	4.3019	7.2412	9.3591	TCGA Affymetrix	25.4	1	Low
1355	TCGA.19.1392	4.7466	7.678	7.0564	TCGA Affymetrix	3.6	1	Low
1356	TCGA.19.1786	8.8165	8.9423	9.6939	TCGA Affymetrix	7.2	0	High
1357	TCGA.19.1787	5.0083	8.2312	7.0453	TCGA Affymetrix	12.7	1	Low
1358	TCGA.19.1788	5.4573	6.3715	6.0947	TCGA Affymetrix	3.7	1	Low
1359	TCGA.19.1789	5.4462	7.5696	7.5797	TCGA Affymetrix	3.2	1	Low
1360	TCGA.19.1790	8.1552	8.2629	9.2673	TCGA Affymetrix	5.1	1	High
1361	TCGA.19.1791	8.6934	8.2818	7.866	TCGA Affymetrix	0.1	0	High
1362	TCGA.19.2619	4.2127	8.8996	8.5972	TCGA Affymetrix	9.7	0	Low
1363	TCGA.19.2620	5.5249	7.8339	7.1997	TCGA Affymetrix	4.9	1	Low
1364	TCGA.19.2621	6.9233	8.5285	6.8074	TCGA Affymetrix	1.1	1	High
1365	TCGA.19.2623	7.2506	8.0908	8.2977	TCGA Affymetrix	7.5	0	High
1366	TCGA.19.2624	5.7454	7.988	8.5893	TCGA Affymetrix	0.2	1	Low
1367	TCGA.19.2625	7.5301	8.7209	7.9144	TCGA Affymetrix	4.1	1	High
1368	TCGA.19.2629	5.7087	7.0853	7.226	TCGA Affymetrix	24.2	1	Low
1369	TCGA.19.2631	5.756	8.4917	9.9557	TCGA Affymetrix	7	1	Low
1370	TCGA.19.4068	7.8541	8.0343	8.6463	TCGA Affymetrix	4.5	0	High
1371	TCGA.19.5947	8.0139	7.5515	8.8302	TCGA Affymetrix	6.6	1	High
1372	TCGA.19.5950	5.5394	8.4267	10.06	TCGA Affymetrix	17.2	1	Low
1373	TCGA.19.5951	6.3477	9.0878	10.4874	TCGA Affymetrix	8	1	High
1374	TCGA.19.5952	8.321	8.2866	8.9914	TCGA Affymetrix	18.9	1	High
1375	TCGA.19.5954	5.807	8.0255	9.4719	TCGA Affymetrix	12.1	1	Low
1376	TCGA.19.5955	8.3596	7.8113	8.694	TCGA Affymetrix	1.8	1	High
1377	TCGA.19.5956	4.2487	8.0847	9.2444	TCGA Affymetrix	22.5	1	Low
1378	TCGA.19.5958	5.8543	8.8566	8.8124	TCGA Affymetrix	14.1	1	Low
1379	TCGA.19.5959	7.1318	8.2449	9.2321	TCGA Affymetrix	16.8	1	High
1380	TCGA.19.5960	4.9619	9.0312	10.0498	TCGA Affymetrix	15	1	Low
1381	TCGA.26.1438	7.0391	7.6923	6.7565	TCGA Affymetrix	10	0	High
1382	TCGA.26.1439	7.4048	8.2113	8.9523	TCGA Affymetrix	13.9	1	High
1383	TCGA.26.1440	9.4702	8.0782	7.9788	TCGA Affymetrix	9.7	0	High
1384	TCGA.26.1442	4.4067	7.1081	8.5066	TCGA Affymetrix	31.3	0	Low
1385	TCGA.26.1443	7.1607	8.2503	8.6401	TCGA Affymetrix	7.1	0	High
1386	TCGA.26.1799	7.7006	8.1341	9.3151	TCGA Affymetrix	9.4	1	High
1387	TCGA.26.5132	8.3827	7.976	8.23	TCGA Affymetrix	9.4	0	High
1388	TCGA.26.5133	4.8681	7.1704	9.8925	TCGA Affymetrix	14.9	0	Low
1389	TCGA.26.5134	6.5615	8.0108	8.2469	TCGA Affymetrix	5.5	0	High
1390	TCGA.26.5135	5.2614	7.5051	9.1554	TCGA Affymetrix	8.9	1	Low
1391	TCGA.26.5136	4.8918	4.9497	5.5918	TCGA Affymetrix	19	1	Low
1392	TCGA.26.5139	7.2648	8.1295	9.1121	TCGA Affymetrix	1.6	0	High
1393	TCGA.27.1830	7.354	7.1566	7.5977	TCGA Affymetrix	5.1	1	High
1394	TCGA.27.1831	8.0947	7.6476	9.3177	TCGA Affymetrix	16.6	1	High
1395	TCGA.27.1832	8.316	8.0666	6.0286	TCGA Affymetrix	9.9	1	High
1396	TCGA.27.1833	6.0781	7.8555	9.335	TCGA Affymetrix	24.2	1	Low
1397	TCGA.27.1834	7.8542	7.228	6.6403	TCGA Affymetrix	40.5	1	High
1398	TCGA.27.1835	8.8277	8.164	9.8851	TCGA Affymetrix	21.3	1	High
1399	TCGA.27.1836	5.0623	7.4231	8.0736	TCGA Affymetrix	30.1	1	Low
1400	TCGA.27.1837	8.4401	8.0088	8.9569	TCGA Affymetrix	14	1	High
1401	TCGA.27.1838	6.066	8.5065	7.5764	TCGA Affymetrix	11.5	1	Low
1402	TCGA.27.2518	6.7449	8.2905	7.6833	TCGA Affymetrix	24.8	1	High
1403	TCGA.27.2519	6.0854	7.6061	7.2886	TCGA Affymetrix	18.1	1	Low
1404	TCGA.27.2521	5.9381	7.0446	8.2321	TCGA Affymetrix	10.4	0	Low
1405	TCGA.27.2523	5.613	8.4895	10.1661	TCGA Affymetrix	16.1	1	Low
1406	TCGA.27.2524	7.2266	7.8417	9.2824	TCGA Affymetrix	7.6	1	High
1407	TCGA.27.2526	5.7352	7.7559	8.141	TCGA Affymetrix	2.9	1	Low
1408	TCGA.27.2527	6.3959	7.0786	8.0317	TCGA Affymetrix	14.4	1	High
1409	TCGA.27.2528	7.9262	8.2982	9.5807	TCGA Affymetrix	15.8	1	High
1410	TCGA.28.1745	7.1436	7.9909	6.2236	TCGA Affymetrix	11.3	0	High
1411	TCGA.28.1746	3.8473	6.9195	6.7501	TCGA Affymetrix	0.2	0	Low
1412	TCGA.28.1747	6.3563	8.542	7.1489	TCGA Affymetrix	2.5	1	High
1413	TCGA.28.1749	7.1553	8.0386	8.6938	TCGA Affymetrix	9.2	0	High
1414	TCGA.28.1750	7.5698	7.833	7.734	TCGA Affymetrix	8.3	0	High
1415	TCGA.28.1751	6.8248	7.7981	9.4027	TCGA Affymetrix	7.6	0	High
1416	TCGA.28.1752	7.0161	7.6683	6.5971	TCGA Affymetrix	8.5	0	High
1417	TCGA.28.1753	7.923	7.5131	8.8607	TCGA Affymetrix	1.2	0	High
1418	TCGA.28.1755	7.3379	8.6268	9.4728	TCGA Affymetrix	1.6	1	High
1419	TCGA.28.1756	5.2921	7.4972	6.1965	TCGA Affymetrix	2.8	0	Low
1420	TCGA.28.1757	7.6445	7.7961	7.646	TCGA Affymetrix	0.1	0	High
1421	TCGA.28.1760	5.6464	8.1277	9.433	TCGA Affymetrix	4.7	0	Low
1422	TCGA.28.2501	5.5842	6.9944	8.4684	TCGA Affymetrix			Low
1423	TCGA.28.2502	7.5624	7.7679	8.3158	TCGA Affymetrix	0.7	0	High
1424	TCGA.28.2506	5.4168	7.3477	7.7886	TCGA Affymetrix	6.7	0	Low
1425	TCGA.28.2509	6.0984	7.6817	7.3767	TCGA Affymetrix	4.8	0	Low
1426	TCGA.28.2510	5.4562	6.8414	8.4634	TCGA Affymetrix			Low
1427	TCGA.28.2513	7.6978	7.9196	7.6196	TCGA Affymetrix	7.3	0	High
1428	TCGA.28.2514	6.206	8.0755	9.6332	TCGA Affymetrix	5.3	0	Low
1429	TCGA.28.5204	3.7252	7.7854	11.8065	TCGA Affymetrix	14.9	1	Low
1430	TCGA.28.5207	7.5338	7.3347	7.3173	TCGA Affymetrix	11.3	1	High
1431	TCGA.28.5208	7.5396	6.7198	7.9882	TCGA Affymetrix	17.9	1	High
1432	TCGA.28.5209	6.1279	9.056	9.7695	TCGA Affymetrix	2.5	0	Low
1433	TCGA.28.5213	6.3464	8.6062	7.7155	TCGA Affymetrix	31.3	0	High
1434	TCGA.28.5214	6.8449	7.4711	6.3112	TCGA Affymetrix	23.4	1	High
1435	TCGA.28.5215	6.4949	8.1643	10.4685	TCGA Affymetrix	11	1	High
1436	TCGA.28.5216	5.2828	8.0963	10.3149	TCGA Affymetrix	13.6	0	Low
1437	TCGA.28.5218	7.9586	8.4226	10.7981	TCGA Affymetrix	5.2	1	High
1438	TCGA.28.5219	5.9132	8.0321	8.704	TCGA Affymetrix	22.7	0	Low
1439	TCGA.28.5220	6.9154	7.7914	9.1521	TCGA Affymetrix	10.5	0	High
1440	TCGA.28.6450	4.7458	7.4052	10.1231	TCGA Affymetrix	5.4	1	Low
1441	TCGA.32.1970	6.7493	7.8383	8.3791	TCGA Affymetrix	15.4	1	High
1442	TCGA.32.1973	4.7473	8.0018	9.9664	TCGA Affymetrix	21.1	1	Low
1443	TCGA.32.1976	5.6778	7.0132	8.0323	TCGA Affymetrix	0.5	1	Low
1444	TCGA.32.1977	7.2913	8.2965	9.0754	TCGA Affymetrix	0.1	0	High
1445	TCGA.32.1978	3.9556	8.7908	9.9064	TCGA Affymetrix	15.8	1	Low
1446	TCGA.32.1979	6.6861	7.96	9.1805	TCGA Affymetrix	19.5	1	High
1447	TCGA.32.1980	6.7235	6.9227	8.5523	TCGA Affymetrix	1.2	1	High
1448	TCGA.32.1982	9.2316	7.6655	8.9748	TCGA Affymetrix	4.7	1	High
1449	TCGA.32.1986	6.693	7.8347	9.2514	TCGA Affymetrix	12.7	1	High
1450	TCGA.32.1987	5.2592	7.8374	7.688	TCGA Affymetrix	14.9	1	Low
1451	TCGA.32.1991	7.3551	8.7311	8.0987	TCGA Affymetrix	16.9	1	High
1452	TCGA.32.2491	7.0396	7.7955	9.6403	TCGA Affymetrix	12.2	1	High
1453	TCGA.32.2494	6.137	8.2038	9.5567	TCGA Affymetrix	20.8	1	Low
1454	TCGA.32.2495	5.1718	8.0156	8.5017	TCGA Affymetrix	15	1	Low
1455	TCGA.32.2615	5.6174	8.0031	8.6941	TCGA Affymetrix	15.9	1	Low
1456	TCGA.32.2616	4.6819	7.5732	8.0883	TCGA Affymetrix	7.4	1	Low
1457	TCGA.32.2632	11.5106	8.5225	7.443	TCGA Affymetrix	8.8	1	High
1458	TCGA.32.2634	5.866	7.6297	7.8004	TCGA Affymetrix	22.8	0	Low
1459	TCGA.32.2638	5.8639	7.4015	9.753	TCGA Affymetrix	25.2	1	Low
1460	TCGA.32.4208	4.5776	6.9983	9.7774	TCGA Affymetrix	21.1	0	Low
1461	TCGA.32.4209	7.9413	6.9313	8.4526	TCGA Affymetrix	20.3	1	High
1462	TCGA.32.4210	6.0247	6.9189	8.3469	TCGA Affymetrix	3.7	1	Low
1463	TCGA.32.4211	8.4173	8.5221	8.2861	TCGA Affymetrix	12.6	1	High
1464	TCGA.32.4213	10.2829	7.9382	8.5891	TCGA Affymetrix	19.9	0	High
1465	TCGA.32.4719	5.6802	8.0801	7.451	TCGA Affymetrix	10.8	1	Low
1466	TCGA.32.5222	8.6114	7.1791	9.2613	TCGA Affymetrix	19.2	1	High
1467	TCGA.41.2571	4.5146	7.3593	7.2828	TCGA Affymetrix	0.8	1	Low
1468	TCGA.41.2572	5.6295	8.2213	10.0795	TCGA Affymetrix	13.3	1	Low
1469	TCGA.41.2573	5.4037	7.2347	6.5544	TCGA Affymetrix	8.9	0	Low
1470	TCGA.41.2575	6.2381	8.7854	7.7799	TCGA Affymetrix	9.5	1	Low
1471	TCGA.41.3392	5.2997	8.6954	7.807	TCGA Affymetrix	1	1	Low
1472	TCGA.41.3393	5.9939	6.972	9.3721	TCGA Affymetrix	4.4	1	Low
1473	TCGA.41.3915	6.1292	8.1979	7.3912	TCGA Affymetrix	11.8	1	Low
1474	TCGA.41.4097	5.7428	7.3833	8.9458	TCGA Affymetrix	0.2	1	Low
1475	TCGA.41.5651	6.3587	6.9236	8.896	TCGA Affymetrix	15.1	1	High
1476	TCGA.76.4925	4.5896	6.7656	8.9629	TCGA Affymetrix	4.8	1	Low
1477	TCGA.76.4926	6.4483	8.2767	9.1099	TCGA Affymetrix	4.5	1	High
1478	TCGA.76.4927	5.0175	6.9692	8.0513	TCGA Affymetrix	17.6	1	Low
1479	TCGA.76.4928	5.8384	8.3538	9.3734	TCGA Affymetrix	3.1	1	Low
1480	TCGA.76.4929	7.7498	7.7972	7.8718	TCGA Affymetrix	3.6	1	High
1481	TCGA.76.4931	8.366	7.99	8.1566	TCGA Affymetrix	9.2	1	High
1482	TCGA.76.4932	5.2008	7.1809	9.7975	TCGA Affymetrix	47.9	1	Low
1483	TCGA.76.4934	6.5451	7.8676	8.3685	TCGA Affymetrix	2.5	1	High
1484	TCGA.76.4935	5.3275	7.5835	9.1111	TCGA Affymetrix	36.9	1	Low
1485	TCGA.76.6191	5.4223	7.3693	9.2745	TCGA Affymetrix	16.7	1	Low
1486	TCGA.76.6192	7.2845	8.4883	8.8063	TCGA Affymetrix	3.3	1	High
1487	TCGA.76.6193	5.8632	7.4414	8.016	TCGA Affymetrix	2.7	1	Low
1488	TCGA.76.6282	7.3654	7.5362	7.9685	TCGA Affymetrix	17.1	1	High
1489	TCGA.76.6285	6.8772	7.9945	7.6277	TCGA Affymetrix	8.3	1	High
1490	TCGA.81.5910	5.5151	7.5748	9.0042	TCGA Affymetrix	1.6	1	Low
1491	TCGA.87.5896	5.314	7.3482	10.31	TCGA Affymetrix	26.3	0	Low
1492	TCGA.02.0047	5.98172	8.26019	10.3971	TCGA Rnaseq	14.7	1	Low
1493	TCGA.02.2483	5.88705	7.98994	11.3632	TCGA Rnaseq	15.3	0	Low
1494	TCGA.02.2485	8.64909	11.5071	11.9183	TCGA Rnaseq	15.4	0	Low
1495	TCGA.02.2486	8.94062	9.44469	9.89162	TCGA Rnaseq	20.3	1	Low
1496	TCGA.06.0125	10.3125	9.29069	12.0247	TCGA Rnaseq	47.6	1	High
1497	TCGA.06.0129	5.16737	7.55128	10.938	TCGA Rnaseq	33.7	1	Low
1498	TCGA.06.0130	10.729	8.18672	11.9958	TCGA Rnaseq	12.9	1	High
1499	TCGA.06.0132	10.3264	7.95996	9.48224	TCGA Rnaseq	25.4	1	High
1500	TCGA.06.0138	9.31513	10.1024	10.873	TCGA Rnaseq	24.2	1	Low
1501	TCGA.06.0141	10.5268	8.47049	10.3024	TCGA Rnaseq	10.3	1	High
1502	TCGA.06.0152	9.1754	9.15006	12.4585	TCGA Rnaseq	12.3	1	Low
1503	TCGA.06.0156	10.5514	8.69175	10.2205	TCGA Rnaseq	5.8	1	High
1504	TCGA.06.0157	11.2317	10.0133	12.1692	TCGA Rnaseq	3.2	1	High
1505	TCGA.06.0158	8.74925	9.67802	11.4499	TCGA Rnaseq	10.8	1	Low
1506	TCGA.06.0168	7.35177	9.62058	9.4513	TCGA Rnaseq	19.7	1	Low
1507	TCGA.06.0171	9.11849	8.73059	10.7655	TCGA Rnaseq	13.1	1	Low
1508	TCGA.06.0174	9.35993	9.50416	11.0263	TCGA Rnaseq	3.2	1	Low
1509	TCGA.06.0178	7.74297	7.95895	10.5053	TCGA Rnaseq	88.1	1	Low
1510	TCGA.06.0184	8.41097	9.13958	10.9697	TCGA Rnaseq	69.9	1	Low
1511	TCGA.06.0187	10.553	10.4973	12.0203	TCGA Rnaseq	27.2	1	High
1512	TCGA.06.0190	11.9191	9.50834	11.4686	TCGA Rnaseq	10.4	1	High
1513	TCGA.06.0210	13.3985	9.45304	11.6335	TCGA Rnaseq	7.4	1	High
1514	TCGA.06.0211	8.98115	8.47886	12.6552	TCGA Rnaseq	11.8	1	Low
1515	TCGA.06.0219	10.2587	9.11819	10.6101	TCGA Rnaseq	0.7	1	High
1516	TCGA.06.0238	8.7292	7.83841	9.99369	TCGA Rnaseq	13.3	1	Low
1517	TCGA.06.0644	10.6448	7.57294	12.1885	TCGA Rnaseq	12.6	1	High
1518	TCGA.06.0645	10.1363	9.45106	11.4476	TCGA Rnaseq	5.8	1	High
1519	TCGA.06.0646	9.15726	9.7132	11.437	TCGA Rnaseq	5.8	1	Low
1520	TCGA.06.0649	10.3319	8.00573	9.78906	TCGA Rnaseq	2.1	1	High
1521	TCGA.06.0686	8.25605	8.91345	9.78058	TCGA Rnaseq	14.2	1	Low
1522	TCGA.06.0743	11.4379	9.98548	11.7906	TCGA Rnaseq	26.4	1	High
1523	TCGA.06.0744	9.26093	10.1266	11.663	TCGA Rnaseq	46.9	1	Low
1524	TCGA.06.0745	10.4056	9.49537	11.3883	TCGA Rnaseq	7.9	1	High
1525	TCGA.06.0747	8.62674	9.7745	11.7387	TCGA Rnaseq	2.7	1	Low
1526	TCGA.06.0749	10.1937	9.90364	8.5952	TCGA Rnaseq	2.7	1	High
1527	TCGA.06.0750	13.0125	9.65143	10.6193	TCGA Rnaseq	0.9	1	High
1528	TCGA.06.0878	10.3336	9.3401	11.5925	TCGA Rnaseq	7.2	0	High
1529	TCGA.06.0882	11.0932	9.8931	11.1719	TCGA Rnaseq	20.8	1	High
1530	TCGA.06.1804	11.3789	9.75992	9.56575	TCGA Rnaseq	13.6	1	High
1531	TCGA.06.2557	11.8238	9.90861	12.8236	TCGA Rnaseq	1.1	1	High
1532	TCGA.06.2558	8.48615	9.05478	10.5366	TCGA Rnaseq	12.5	1	Low
1533	TCGA.06.2559	10.5502	10.1961	11.9776	TCGA Rnaseq	4.9	1	High
1534	TCGA.06.2561	11.5056	9.01435	10.9009	TCGA Rnaseq	17.6	1	High
1535	TCGA.06.2562	10.0135	8.15869	12.7176	TCGA Rnaseq	12.6	1	Low
1536	TCGA.06.2563	9.4355	9.13724	12.5446	TCGA Rnaseq	30.6	0	Low
1537	TCGA.06.2564	10.1976	9.23026	11.173	TCGA Rnaseq	6	0	High
1538	TCGA.06.2565	11.2545	9.49928	13.2553	TCGA Rnaseq	16.6	1	High
1539	TCGA.06.2567	11.4668	10.2913	9.87625	TCGA Rnaseq	4.4	1	High
1540	TCGA.06.2569	13.0683	10.7354	10.3514	TCGA Rnaseq	0.4	0	High
1541	TCGA.06.2570	5.14864	7.66914	11.1344	TCGA Rnaseq	31.5	0	Low
1542	TCGA.06.5408	11.7271	9.36057	11.1047	TCGA Rnaseq	11.7	1	High
1543	TCGA.06.5410	10.2667	8.69242	10.1331	TCGA Rnaseq	3.5	1	High
1544	TCGA.06.5411	8.83965	8.91864	9.82282	TCGA Rnaseq	8.3	1	Low
1545	TCGA.06.5412	12.3438	8.9756	10.8759	TCGA Rnaseq	4.5	1	High
1546	TCGA.06.5413	11.2842	9.74638	10.7899	TCGA Rnaseq	8.8	0	High
1547	TCGA.06.5414	9.1739	9.38501	10.9925	TCGA Rnaseq	9	0	Low
1548	TCGA.06.5415	10.0921	9.30001	11.6886	TCGA Rnaseq	8.6	0	High
1549	TCGA.06.5416	12.2725	8.24934	11.5348	TCGA Rnaseq	6.7	0	High
1550	TCGA.06.5417	6.49497	7.6502	10.9369	TCGA Rnaseq	5.1	0	Low
1551	TCGA.06.5418	10.0741	9.76569	11.4665	TCGA Rnaseq	2.7	1	Low
1552	TCGA.06.5856	10.2461	8.9466	11.9226	TCGA Rnaseq	3.8	1	High
1553	TCGA.06.5858	8.54609	9.2865	11.189	TCGA Rnaseq	6.2	0	Low
1554	TCGA.06.5859	9.43039	9.59075	10.0344	TCGA Rnaseq	4.6	0	Low
1555	TCGA.08.0386	9.63235	9.75414	9.76402	TCGA Rnaseq	18	1	Low
1556	TCGA.12.0616	9.46628	9.02892	10.9917	TCGA Rnaseq	14.7	1	Low
1557	TCGA.12.0618	8.29972	8.35614	10.649	TCGA Rnaseq	13	1	Low
1558	TCGA.12.0619	10.8871	9.27127	10.7555	TCGA Rnaseq	34.9	1	High
1559	TCGA.12.0821	10.8802	9.73162	11.4793	TCGA Rnaseq	10.6	1	High
1560	TCGA.12.1597	8.32333	8.7791	11.2183	TCGA Rnaseq	22.2	1	Low
1561	TCGA.12.3650	10.8809	9.84686	11.3951	TCGA Rnaseq	10.9	1	High
1562	TCGA.12.3652	11.2798	9.97574	12.2125	TCGA Rnaseq	34.9	1	High
1563	TCGA.12.3653	6.00707	9.33678	10.7782	TCGA Rnaseq	14.5	1	Low
1564	TCGA.12.5295	6.80603	8.75248	10.4622	TCGA Rnaseq	14.9	1	Low
1565	TCGA.12.5299	9.33426	9.85832	11.7876	TCGA Rnaseq	3.2	1	Low
1566	TCGA.14.0736	11.2713	9.11974	9.29826	TCGA Rnaseq	15.1	1	High
1567	TCGA.14.0781	11.2887	9.28012	11.7293	TCGA Rnaseq	1	1	High
1568	TCGA.14.0787	9.60578	9.00847	11.3832	TCGA Rnaseq	2.2	1	Low
1569	TCGA.14.0789	12.4099	8.85263	11.773	TCGA Rnaseq	11.2	1	High
1570	TCGA.14.0790	12.0649	10.2179	10.9201	TCGA Rnaseq	13.8	1	High
1571	TCGA.14.0817	11.8136	9.89636	11.203	TCGA Rnaseq	5.4	1	High
1572	TCGA.14.1034	10.2638	9.21976	10.2337	TCGA Rnaseq	15.9	1	High
1573	TCGA.14.1402	9.65216	9.24798	11.414	TCGA Rnaseq	32	1	Low
1574	TCGA.14.1823	11.6647	8.911	10.3656	TCGA Rnaseq	17.9	1	High
1575	TCGA.14.1825	8.01137	7.72248	10.0867	TCGA Rnaseq	7.6	1	Low
1576	TCGA.14.1829	9.92516	9.0797	10.4748	TCGA Rnaseq	7.2	0	Low
1577	TCGA.14.2554	9.38745	10.1144	11.361	TCGA Rnaseq	17.5	1	Low
1578	TCGA.15.0742	7.26851	10.4099	11.1805	TCGA Rnaseq	13.8	1	Low
1579	TCGA.15.1444	6.31042	9.56271	10.4057	TCGA Rnaseq	50.5	1	Low
1580	TCGA.16.0846	8.2839	8.40103	8.99261	TCGA Rnaseq	3.9	1	Low
1581	TCGA.16.1045	10.6142	8.93177	10.1438	TCGA Rnaseq	29	1	High
1582	TCGA.19.0957	8.20959	8.11346	9.93068	TCGA Rnaseq	21.9	1	Low
1583	TCGA.19.1389	12.3845	9.6766	11.7086	TCGA Rnaseq	4.6	1	High
1584	TCGA.19.1390	5.93426	8.19556	11.3254	TCGA Rnaseq	25.4	1	Low
1585	TCGA.19.1787	7.99934	9.61844	9.98195	TCGA Rnaseq	12.7	1	Low
1586	TCGA.19.2619	5.52923	10.4512	11.5945	TCGA Rnaseq	9.7	0	Low
1587	TCGA.19.2620	8.18385	9.26222	10.2157	TCGA Rnaseq	4.9	1	Low
1588	TCGA.19.2624	8.9968	10.171	11.1314	TCGA Rnaseq	0.2	1	Low
1589	TCGA.19.2625	10.8961	10.6248	10.1742	TCGA Rnaseq	4.1	1	High
1590	TCGA.19.2629	8.76916	8.29044	9.6029	TCGA Rnaseq	24.2	1	Low
1591	TCGA.19.5960	7.49005	10.4506	12.1292	TCGA Rnaseq	15	1	Low
1592	TCGA.26.1442	6.20777	8.14539	10.5903	TCGA Rnaseq	31.3	0	Low
1593	TCGA.26.5132	11.6162	9.5745	10.5279	TCGA Rnaseq	9.4	0	High
1594	TCGA.26.5133	7.95597	8.45384	12.1314	TCGA Rnaseq	14.9	0	Low
1595	TCGA.26.5134	10.1727	9.5944	10.715	TCGA Rnaseq	5.5	0	High
1596	TCGA.26.5135	8.35351	9.06082	11.2656	TCGA Rnaseq	8.9	1	Low
1597	TCGA.26.5136	10.9309	10.0673	9.69708	TCGA Rnaseq	19	1	High
1598	TCGA.26.5139	10.7712	9.83963	10.8213	TCGA Rnaseq	1.6	0	High
1599	TCGA.27.1830	11.0525	8.40088	10.7463	TCGA Rnaseq	5.1	1	High
1600	TCGA.27.1831	11.2131	9.42093	12.1362	TCGA Rnaseq	16.6	1	High
1601	TCGA.27.1832	11.307	9.62558	9.30965	TCGA Rnaseq	9.9	1	High
1602	TCGA.27.1834	11.2744	8.31015	9.77179	TCGA Rnaseq	40.5	1	High
1603	TCGA.27.1835	12.0824	9.70574	12.2403	TCGA Rnaseq	21.3	1	High
1604	TCGA.27.1837	11.7837	9.26461	11.5442	TCGA Rnaseq	14	1	High
1605	TCGA.27.2519	9.23157	8.89077	10.1588	TCGA Rnaseq	18.1	1	Low
1606	TCGA.27.2521	9.39219	8.17091	10.8856	TCGA Rnaseq	10.4	0	Low
1607	TCGA.27.2523	8.25973	9.6908	12.8872	TCGA Rnaseq	16.1	1	Low
1608	TCGA.27.2524	10.5923	9.73998	11.8204	TCGA Rnaseq	7.6	1	High
1609	TCGA.27.2526	8.23122	9.29598	10.5922	TCGA Rnaseq	2.9	1	Low
1610	TCGA.27.2528	11.5263	9.63633	12.3931	TCGA Rnaseq	15.8	1	High
1611	TCGA.28.1747	9.54695	9.71907	9.72574	TCGA Rnaseq	2.5	1	Low
1612	TCGA.28.1753	11.3648	8.61759	11.4894	TCGA Rnaseq	1.2	0	High
1613	TCGA.28.2509	9.37139	8.89922	10.3963	TCGA Rnaseq	4.8	0	Low
1614	TCGA.28.2510	8.69299	7.96452	10.5983	TCGA Rnaseq			Low
1615	TCGA.28.2513	11.0971	8.99639	10.4803	TCGA Rnaseq	7.3	0	High
1616	TCGA.28.2514	9.65766	9.02292	12.3988	TCGA Rnaseq	5.3	0	Low
1617	TCGA.28.5204	8.87006	9.83667	11.4195	TCGA Rnaseq	14.9	1	Low
1618	TCGA.28.5207	10.8454	10.2403	11.1272	TCGA Rnaseq	11.3	1	High
1619	TCGA.28.5208	10.7529	9.04515	12.1601	TCGA Rnaseq	17.9	1	High
1620	TCGA.28.5209	12.7397	8.70011	12.3922	TCGA Rnaseq	2.5	0	High
1621	TCGA.28.5213	10.3581	9.1234	8.88646	TCGA Rnaseq	31.3	0	High
1622	TCGA.28.5215	10.0275	8.62798	10.4741	TCGA Rnaseq	11	1	Low
1623	TCGA.28.5216	10.8118	8.57725	10.6	TCGA Rnaseq	13.6	0	High
1624	TCGA.28.5218	14.8944	8.15979	9.83348	TCGA Rnaseq	5.2	1	High
1625	TCGA.28.5220	15.9461	8.94648	9.39176	TCGA Rnaseq	10.5	0	High
1626	TCGA.32.1970	10.0388	9.03882	10.8937	TCGA Rnaseq	15.4	1	Low
1627	TCGA.32.1980	10.2511	8.12979	10.6639	TCGA Rnaseq	1.2	1	High
1628	TCGA.32.1982	13.0753	8.85653	11.6398	TCGA Rnaseq	4.7	1	High
1629	TCGA.32.2615	9.30386	9.58272	11.5526	TCGA Rnaseq	15.9	1	Low
1630	TCGA.32.2616	6.99362	9.11626	10.8727	TCGA Rnaseq	7.4	1	Low
1631	TCGA.32.2632	15.8448	9.81321	10.5522	TCGA Rnaseq	8.8	1	High
1632	TCGA.32.2634	9.05035	8.51734	10.3498	TCGA Rnaseq	22.8	0	Low
1633	TCGA.32.2638	9.09613	8.64481	12.7178	TCGA Rnaseq	25.2	1	Low
1634	TCGA.32.4213	14.5661	9.43047	10.9631	TCGA Rnaseq	19.9	0	High
1635	TCGA.32.5222	12.2347	9.85579	12.3272	TCGA Rnaseq	19.2	1	High
1636	TCGA.41.2571	6.53827	8.39788	9.97805	TCGA Rnaseq	0.8	1	Low
1637	TCGA.41.2572	9.12938	10.0791	11.9237	TCGA Rnaseq	13.3	1	Low
1638	TCGA.41.3915	9.5712	9.62636	10.2218	TCGA Rnaseq	11.8	1	Low
1639	TCGA.41.4097	9.77254	8.46882	11.3816	TCGA Rnaseq	0.2	1	Low
1640	TCGA.41.5651	9.88632	7.77276	10.7909	TCGA Rnaseq	15.1	1	Low
1641	TCGA.76.4925	8.43275	10.826	13.2528	TCGA Rnaseq	4.8	1	Low
1642	TCGA.76.4926	9.35622	9.47647	9.59977	TCGA Rnaseq	4.5	1	Low
1643	TCGA.76.4927	9.61994	8.9591	10.7967	TCGA Rnaseq	17.6	1	Low
1644	TCGA.76.4928	10.5249	8.42651	11.0624	TCGA Rnaseq	3.1	1	High
1645	TCGA.76.4929	10.7917	8.92227	9.69051	TCGA Rnaseq	3.6	1	High
1646	TCGA.76.4931	10.7215	9.01984	11.2066	TCGA Rnaseq	9.2	1	High
1647	TCGA.76.4932	11.9098	9.589	11.2797	TCGA Rnaseq	47.9	1	High
1648	GSM1185877	10.9118	8.70908	10.9215	Bao
1649	GSM1185879	10.8102	10.2521	12.7163	Bao
1650	GSM1185884	10.1818	9.35865	12.6235	Bao
1651	GSM1185886	9.66445	9.47877	10.6225	Bao
1652	GSM1185891	3.08746	7.75822	11.6695	Bao
1653	GSM1185893	11.6872	8.76984	11.0583	Bao
1654	GSM1185900	11.0324	9.35425	10.6353	Bao
1655	GSM1185904	5.50779	8.29232	10.7172	Bao
1656	GSM1185906	6.7211	7.8857	11.1456	Bao
1657	GSM1185907	12.6765	9.77066	11.6513	Bao
1658	GSM1185908	8.03067	8.52552	12.6356	Bao
1659	GSM1185912	6.03342	6.34873	10.6861	Bao
1660	GSM1185916	7.10329	8.31967	11.1771	Bao
1661	GSM1185928	7.79116	8.44501	12.8107	Bao
1662	GSM1185932	10.2986	8.52552	13.2529	Bao
1663	GSM1185939	11.3867	8.03067	12.9448	Bao
1664	GSM1185944	6.3837	8.44915	11.51	Bao
1665	GSM1185947	10.3821	9.21553	11.939	Bao
1666	GSM1185949	10.4538	9.97082	12.7218	Bao
1667	GSM1185950	5.30378	7.73132	9.40833	Bao
1668	GSM1185951	8.72622	9.36523	12.0142	Bao
1669	GSM1185956	4.55459	6.7211	9.65195	Bao
1670	GSM1185958	7.48784	7.17493	11.4755	Bao
1671	GSM1185960	7.25267	8.44501	12.0599	Bao
1672	GSM1185963	9.98655	9.17118	11.0904	Bao
1673	GSM1185968	5.06609	6.8009	10.2674	Bao
1674	GSM1185971	7.27146	7.95128	12.121	Bao
1675	GSM1185972	10.395	8.20701	11.6204	Bao
1676	GSM1185976	10.6569	9.22521	13.3142	Bao
1677	GSM1185977	6.13955	5.91886	11.5447	Bao
1678	GSM1185979	5.37504	7.3966	10.0908	Bao
1679	GSM1185982	10.3032	9.34541	9.15861	Bao
1680	GSM1185984	10.8325	8.96723	10.5882	Bao
1681	GSM1185986	13.3517	9.83999	13.7974	Bao
1682	GSM1185987	11.0671	8.55651	11.0691	Bao
1683	GSM1185989	7.65464	7.99152	10.5053	Bao
1684	GSM1185992	10.6613	7.00562	11.7991	Bao
1685	GSM1185993	11.2134	9.6101	12.9238	Bao
1686	GSM1185998	5.98868	6.60733	11.3245	Bao
1687	GSM1185999	9.76901	7.87958	11.6726	Bao
1688	GSM1186006	10.8997	8.39446	11.8063	Bao
1689	GSM1186007	8.61655	8.27845	13.1474	Bao
1690	GSM1186008	8.7364	9.97656	11.6638	Bao
1691	GSM1186009	8.29232	7.98014	11.6486	Bao
1692	GSM1186011	11.6414	8.98157	10.6974	Bao
1693	GSM1186014	6.85175	9.30264	12.4743	Bao
1694	GSM1186015	7.56605	9.31854	13.7834	Bao
1695	GSM1186019	10.4497	7.18488	10.0478	Bao
1696	GSM1186020	8.18735	9.29117	10.2627	Bao
1697	GSM1186021	8.84392	9.43983	11.8659	Bao
1698	GSM1186022	11.0825	8.85953	12.2296	Bao
1699	GSM1186026	3.39232	8.57554	10.0437	Bao
1700	GSM1186028	10.4507	8.80896	12.6802	Bao
1701	GSM1186029	6.07682	9.70477	9.80171	Bao
1702	GSM1186030	11.1302	10.776	12.759	Bao
1703	GSM1186031	9.02375	7.80413	10.4078	Bao
1704	GSM1186035	8.16742	9.46455	11.5016	Bao
1705	GSM1186036	5.74147	10.1793	10.2101	Bao
1706	GSM1186038	5.02237	7.73809	9.18611	Bao
1707	GSM1186041	10.6371	9.55746	11.3457	Bao
1708	GSM1186042	7.31741	7.29002	11.3086	Bao
1709	GSM1186047	4.93074	6.90087	11.5194	Bao
1710	GSM1186048	9.57459	8.45738	11.6902	Bao
1711	GSM1186049	7.17493	7.12412	12.176	Bao
1712	GSM1186050	8.85331	8.00282	12.9679	Bao
1713	GSM1186053	5.82018	7.01681	10.2052	Bao
1714	GSM1186055	9.40833	9.43983	10.8622	Bao
1715	GSM1186056	8.66711	9.16867	10.7686	Bao
1716	GSM1186058	9.29347	8.24079	13.3463	Bao
1717	GSM1186059	10.3723	9.18115	9.31175	Bao
1718	GSM1186060	8.70217	8.72622	12.5468	Bao
1719	GSM1186064	11.2049	9.32531	11.5214	Bao
1720	GSM1186065	7.87958	7.87958	12.4368	Bao
1721	GSM1186069	4.93074	7.29002	10.5522	Bao
1722	GSM1186071	8.01959	7.3443	11.5715	Bao
1723	GSM1186073	9.64476	8.0954	12.4588	Bao
1724	GSM1186074	5.53916	8.34651	11.4729	Bao
1725	GSM1186076	7.93369	7.90989	11.4996	Bao
1726	GSM1186079	10.2929	9.00141	11.6057	Bao
1727	GSM1186081	10.8754	9.76736	13.3282	Bao
1728	GSM1186082	9.50283	10.1402	10.2662	Bao
1729	GSM1186084	4.88264	7.08215	10.8553	Bao
1730	GSM1186085	5.76818	8.2738	10.9259	Bao
1731	GSM1186086	3.85798	6.7211	10.5522	Bao
1732	GSM1186088	5.44294	7.76487	12.2896	Bao
1733	GSM1186091	6.17991	9.19353	9.39339	Bao
1734	GSM1186093	7.40514	8.65284	11.6391	Bao
1735	GSM1186101	9.88798	9.77726	12.7451	Bao
1736	GSM1186105	11.9101	9.16365	9.91663	Bao
1737	GSM1186108	9.58214	9.83999	12.0843	Bao
1738	GSM1186109	10.7703	9.96073	12.4431	Bao
1739	GSM1186111	5.40939	7.83605	10.7343	Bao
1740	GSM1186112	9.14338	8.40301	10.4883	Bao
1741	GSM1186113	10.8529	9.55171	11.3834	Bao
1742	GSM1186114	7.76487	9.16616	10.8317	Bao
1743	GSM1186123	7.25267	7.66178	10.3326	Bao
1744	GSM1186126	9.37613	8.73978	13.1503	Bao
1745	GSM1186128	5.91886	7.80413	11.1957	Bao
1746	GSM1186131	9.30035	8.43254	11.0144	Bao
1747	GSM1186135	3.75489	8.14211	10.8459	Bao
1748	GSM1410161	6.9612	9.1736	8.7689	Oh
1749	GSM1410162	6.4043	8.6025	9.0695	Oh
1750	GSM1410163	7.3968	10.1601	9.9587	Oh
1751	GSM1410164	7.7888	10.1552	9.3575	Oh
1752	GSM1410165	6.4523	9.1145	9.3815	Oh
1753	GSM1410166	8.0237	9.903	9.3313	Oh
1754	GSM1410167	8.0792	9.4775	9.5063	Oh
1755	GSM1410168	5.8795	10.0231	6.1152	Oh
1756	GSM1410169	5.8569	8.696	10.439	Oh
1757	GSM1410170	7.9253	9.3354	9.262	Oh
1758	GSM1410171	8.1128	8.9612	9.5298	Oh
1759	GSM1410172	6.5734	8.4707	9.8071	Oh
1760	GSM1410173	5.7804	9.2617	9.3783	Oh
1761	GSM1410174	7.9854	9.1393	10.4707	Oh
1762	GSM1410175	7.8751	9.4667	9.514	Oh
1763	GSM1410176	5.9513	9.2559	9.6308	Oh
1764	GSM1410177	7.3647	8.004	9.5902	Oh
1765	GSM1410178	8.0966	9.1407	9.7814	Oh
1766	GSM1410179	6.6739	8.7974	9.2188	Oh
1767	GSM1410180	9.4708	9.4292	11.044	Oh
1768	GSM1410181	10.4933	9.7244	9.7929	Oh
1769	GSM1410182	11.1858	9.8255	9.7988	Oh
1770	GSM1410183	6.6076	7.6037	9.4304	Oh
1771	GSM1410184	8.2458	8.9169	8.2977	Oh
1772	GSM1410185	7.5325	8.7877	9.2489	Oh
1773	GSM1410186	8.9566	9.2784	9.1162	Oh
1774	GSM1410187	6.0964	9.2048	6.6979	Oh
1775	GSM1410188	7.5468	9.0155	9.0599	Oh
1776	GSM1410189	5.6632	9.1451	9.6402	Oh
1777	GSM1410190	8.206	9.2003	9.5986	Oh
1778	GSM1410191	7.325	9.0564	9.3233	Oh
1779	GSM1410192	5.9241	8.0699	9.0757	Oh
1780	GSM1410193	7.6516	9.1399	9.3324	Oh
1781	GSM1410194	9.2276	9.8689	10.1413	Oh
1782	GSM1410195	6.1453	8.4739	8.5865	Oh
1783	GSM1410196	6.5465	8.9365	9.016	Oh
1784	GSM1410197	8.3166	9.2265	9.0946	Oh
1785	GSM1410198	7.3869	7.8526	8.5155	Oh
1786	GSM1410199	7.9719	8.9212	8.3039	Oh
1787	GSM1410200	8.327	8.2732	8.741	Oh
1788	GSM1410201	7.2341	8.7788	8.1747	Oh
1789	GSM1410202	6.2396	6.7386	8.5836	Oh
1790	GSM1410203	6.9828	9.3285	9.6422	Oh
1791	GSM1410204	8.5758	10.194	9.2001	Oh
1792	GSM1410205	6.1502	9.3875	9.4346	Oh
1793	GSM1410206	6.3814	8.1413	7.5505	Oh
1794	GSM1410207	6.5152	9.6813	10.0535	Oh
1795	GSM1410208	6.9109	9.4243	9.3424	Oh
1796	GSM1410209	7.1411	8.6608	7.4156	Oh
1797	GSM1410210	6.4546	9.1477	8.5125	Oh
1798	GSM1410211	8.3186	9.4493	8.486	Oh
1799	GSM1410212	7.3428	9.456	9.2756	Oh
1800	GSM1410213	9.3261	8.7223	8.4615	Oh
1801	GSM1410214	8.1875	8.4583	8.1765	Oh
1802	GSM1410215	8.2371	9.3978	7.6552	Oh
1803	GSM1410216	10.1532	8.9103	9.0533	Oh
1804	GSM1410217	7.9736	7.8204	8.6017	Oh
1805	GSM1410218	8.5844	9.7386	8.446	Oh
1806	GSM1410219	9.8452	9.89	8.4084	Oh
1807	GSM1410220	7.4141	9.5695	8.5789	Oh
1808	GSM1410221	6.9946	8.6692	8.1081	Oh
1809	GSM1410222	9.8295	9.5071	6.9058	Oh
1810	GSM1410223	6.3358	9.5274	8.678	Oh
1811	GSM1410224	9.9826	9.4725	8.5097	Oh
1812	GSM1410225	7.3957	8.4838	8.065	Oh
1813	GSM1410226	11.3668	10.845	8.9173	Oh
1814	GSM1410227	7.0987	10.0089	8.1841	Oh
1815	GSM1410228	8.0783	9.6506	6.8743	Oh
1816	GSM1410229	7.465	9.1805	9.1569	Oh
1817	GSM1410230	6.2067	8.8345	6.9274	Oh
1818	GSM1410231	5.8575	7.415	8.4406	Oh
1819	GSM1410232	7.651	9.0964	8.7983	Oh
1820	GSM1410233	9.3622	9.4357	8.2914	Oh
1821	GSM1410234	5.8321	8.6132	7.8614	Oh
1822	GSM1410235	7.6051	9.162	9.2375	Oh
1823	GSM1410236	7.5747	9.5996	8.0128	Oh
1824	GSM1410237	10.1575	8.9991	7.7892	Oh
1825	GSM1410238	8.486	9.6798	7.6771	Oh
1826	GSM1410239	6.6751	9.4242	7.8463	Oh
1827	GSM1410240	6.494	9.521	8.5774	Oh
1828	GSM1410241	10.8165	9.3777	9.9747	Oh
1829	GSM1410242	8.3079	9.1887	8.7919	Oh
1830	GSM1410243	7.3335	9.0655	8.5595	Oh
1831	GSM1410244	8.7145	9.1409	7.161	Oh
1832	GSM1410245	8.6654	9.2801	8.6131	Oh
1833	GSM1410246	6.2128	8.9159	8.2455	Oh
1834	GSM1410247	8.6504	9.8348	8.3256	Oh
1835	GSM1410248	7.9538	7.6652	8.3756	Oh
1836	GSM1410249	5.752	8.3898	7.7785	Oh
1837	GSM1410250	6.1068	9.0942	8.8341	Oh
1838	GSM1410251	10.5424	8.5983	8.4748	Oh
1839	GSM1410252	5.3909	9.7793	8.4661	Oh
1840	GSM1410253	10.138	8.9498	9.3076	Oh
1841	GSM1410254	5.9251	6.6377	8.6924	Oh
1842	GSM1410255	5.9221	8.2874	7.9549	Oh
1843	GSM1410256	11.115	9.7665	7.856	Oh
1844	GSM1410257	7.4949	8.5546	8.8932	Oh
1845	GSM1410258	9.9229	9.6732	8.0452	Oh
1846	GSM1410259	8.211	9.1704	9.5534	Oh
1847	GSM1410260	8.6776	7.804	8.9992	Oh
1848	GSM1410261	8.6433	7.973	8.2485	Oh
1849	GSM1410262	7.9699	9.2088	9.1569	Oh
1850	GSM1410263	8.2866	8.5543	9.1175	Oh
1851	GSM1410264	5.4515	9.2101	10.4674	Oh
1852	GSM1410265	6.025	9.548	9.1861	Oh
