# Supplementary material for: Differentiated glioma cell-derived fibromodulin activates integrin-dependent Notch signaling in endothelial cells to promote tumor angiogenesis and growth
Source: eLife journal article supplement (doi:10.7554/elife.78972), 2022-06-01
Supplement: fig4-figsupp6-data1 [file RAW VALUES FOR DOT PLOTS FOR PANELS A,B,C.xlsx]

## Sheet: BOXPLOT_FMOD
expr	Condition	Dataset
2.55	Control	CGGA Rnaseq
0.42	Control	CGGA Rnaseq
2.59	Control	CGGA Rnaseq
1.08	Control	CGGA Rnaseq
0.66	Control	CGGA Rnaseq
16.88	Control	CGGA Rnaseq
1.15	Control	CGGA Rnaseq
1.89	Control	CGGA Rnaseq
39.86	Control	CGGA Rnaseq
0.6	Control	CGGA Rnaseq
1.92	Control	CGGA Rnaseq
0.75	Control	CGGA Rnaseq
0.71	Control	CGGA Rnaseq
1.48	Control	CGGA Rnaseq
5.23	Control	CGGA Rnaseq
0.39	Control	CGGA Rnaseq
0.65	Control	CGGA Rnaseq
3.71	Control	CGGA Rnaseq
2.69	Control	CGGA Rnaseq
0.57	Control	CGGA Rnaseq
1.32	GBM	CGGA Rnaseq
10.23	GBM	CGGA Rnaseq
5.95	GBM	CGGA Rnaseq
74.49	GBM	CGGA Rnaseq
4.38	GBM	CGGA Rnaseq
1.8	GBM	CGGA Rnaseq
3.64	GBM	CGGA Rnaseq
22.95	GBM	CGGA Rnaseq
4.55	GBM	CGGA Rnaseq
8.36	GBM	CGGA Rnaseq
28.61	GBM	CGGA Rnaseq
0.95	GBM	CGGA Rnaseq
32.64	GBM	CGGA Rnaseq
42.41	GBM	CGGA Rnaseq
9.85	GBM	CGGA Rnaseq
0.64	GBM	CGGA Rnaseq
24.84	GBM	CGGA Rnaseq
3.75	GBM	CGGA Rnaseq
15.31	GBM	CGGA Rnaseq
5.85	GBM	CGGA Rnaseq
28.09	GBM	CGGA Rnaseq
57.54	GBM	CGGA Rnaseq
10.33	GBM	CGGA Rnaseq
8.7	GBM	CGGA Rnaseq
25.18	GBM	CGGA Rnaseq
8.27	GBM	CGGA Rnaseq
0.77	GBM	CGGA Rnaseq
11.25	GBM	CGGA Rnaseq
2.42	GBM	CGGA Rnaseq
23.64	GBM	CGGA Rnaseq
12.94	GBM	CGGA Rnaseq
0.31	GBM	CGGA Rnaseq
4.79	GBM	CGGA Rnaseq
21.01	GBM	CGGA Rnaseq
27.04	GBM	CGGA Rnaseq
30.52	GBM	CGGA Rnaseq
55.55	GBM	CGGA Rnaseq
34.34	GBM	CGGA Rnaseq
2.06	GBM	CGGA Rnaseq
3.28	GBM	CGGA Rnaseq
20.82	GBM	CGGA Rnaseq
4	GBM	CGGA Rnaseq
57.51	GBM	CGGA Rnaseq
21.08	GBM	CGGA Rnaseq
17.27	GBM	CGGA Rnaseq
0.91	GBM	CGGA Rnaseq
0.39	GBM	CGGA Rnaseq
24.36	GBM	CGGA Rnaseq
30.18	GBM	CGGA Rnaseq
1.62	GBM	CGGA Rnaseq
24.98	GBM	CGGA Rnaseq
1.33	GBM	CGGA Rnaseq
0.73	GBM	CGGA Rnaseq
24.44	GBM	CGGA Rnaseq
46.79	GBM	CGGA Rnaseq
111.11	GBM	CGGA Rnaseq
48.24	GBM	CGGA Rnaseq
3.32	GBM	CGGA Rnaseq
30.26	GBM	CGGA Rnaseq
38.43	GBM	CGGA Rnaseq
16.94	GBM	CGGA Rnaseq
12.96	GBM	CGGA Rnaseq
11.51	GBM	CGGA Rnaseq
8.07	GBM	CGGA Rnaseq
36.93	GBM	CGGA Rnaseq
9.96	GBM	CGGA Rnaseq
2.19	GBM	CGGA Rnaseq
0.66	GBM	CGGA Rnaseq
0.61	GBM	CGGA Rnaseq
0.7	GBM	CGGA Rnaseq
0.58	GBM	CGGA Rnaseq
1.3	GBM	CGGA Rnaseq
0.62	GBM	CGGA Rnaseq
3.45	GBM	CGGA Rnaseq
1.3	GBM	CGGA Rnaseq
0.83	GBM	CGGA Rnaseq
9.67	GBM	CGGA Rnaseq
4.49	GBM	CGGA Rnaseq
46.08	GBM	CGGA Rnaseq
66.4	GBM	CGGA Rnaseq
25.34	GBM	CGGA Rnaseq
8.07	GBM	CGGA Rnaseq
3.61	GBM	CGGA Rnaseq
2.04	GBM	CGGA Rnaseq
11.94	GBM	CGGA Rnaseq
6.3391	Control	Gravendeel
4.7779	Control	Gravendeel
6.6606	Control	Gravendeel
6.0353	Control	Gravendeel
6.5275	Control	Gravendeel
6.0742	Control	Gravendeel
6.3971	Control	Gravendeel
6.4589	Control	Gravendeel
8.0169	GBM	Gravendeel
10.0864	GBM	Gravendeel
6.5294	GBM	Gravendeel
5.8571	GBM	Gravendeel
7.1431	GBM	Gravendeel
9.0733	GBM	Gravendeel
8.0059	GBM	Gravendeel
7.282	GBM	Gravendeel
8.1268	GBM	Gravendeel
6.7875	GBM	Gravendeel
9.5188	GBM	Gravendeel
7.4355	GBM	Gravendeel
9.1315	GBM	Gravendeel
7.7163	GBM	Gravendeel
9.1336	GBM	Gravendeel
7.0237	GBM	Gravendeel
8.1814	GBM	Gravendeel
7.9803	GBM	Gravendeel
7.0979	GBM	Gravendeel
8.6836	GBM	Gravendeel
9.0504	GBM	Gravendeel
5.7756	GBM	Gravendeel
6.1827	GBM	Gravendeel
7.7621	GBM	Gravendeel
7.0315	GBM	Gravendeel
7.375	GBM	Gravendeel
5.4426	GBM	Gravendeel
8.1422	GBM	Gravendeel
6.6921	GBM	Gravendeel
7.2506	GBM	Gravendeel
5.9764	GBM	Gravendeel
7.1713	GBM	Gravendeel
8.8839	GBM	Gravendeel
5.8402	GBM	Gravendeel
6.2421	GBM	Gravendeel
7.544	GBM	Gravendeel
6.7649	GBM	Gravendeel
6.3835	GBM	Gravendeel
8.6936	GBM	Gravendeel
9.249	GBM	Gravendeel
7.6371	GBM	Gravendeel
7.9543	GBM	Gravendeel
8.5543	GBM	Gravendeel
8.9602	GBM	Gravendeel
9.0921	GBM	Gravendeel
7.0509	GBM	Gravendeel
8.7372	GBM	Gravendeel
8.9165	GBM	Gravendeel
8.2013	GBM	Gravendeel
7.7384	GBM	Gravendeel
5.9756	GBM	Gravendeel
9.259	GBM	Gravendeel
7.9987	GBM	Gravendeel
6.7527	GBM	Gravendeel
9.1087	GBM	Gravendeel
9.044	GBM	Gravendeel
6.2273	GBM	Gravendeel
8.0012	GBM	Gravendeel
6.7022	GBM	Gravendeel
8.5193	GBM	Gravendeel
8.5269	GBM	Gravendeel
7.3289	GBM	Gravendeel
9.2945	GBM	Gravendeel
7.3359	GBM	Gravendeel
8.5517	GBM	Gravendeel
7.4279	GBM	Gravendeel
10.1393	GBM	Gravendeel
9.1762	GBM	Gravendeel
6.1593	GBM	Gravendeel
6.9957	GBM	Gravendeel
8.7158	GBM	Gravendeel
6.5727	GBM	Gravendeel
8.4763	GBM	Gravendeel
6.691	GBM	Gravendeel
8.88	GBM	Gravendeel
9.4116	GBM	Gravendeel
9.631	GBM	Gravendeel
12.1807	GBM	Gravendeel
10.7081	GBM	Gravendeel
9.2808	GBM	Gravendeel
9.3267	GBM	Gravendeel
5.7975	GBM	Gravendeel
7.5014	GBM	Gravendeel
9.8507	GBM	Gravendeel
6.4318	GBM	Gravendeel
7.5033	GBM	Gravendeel
7.5915	GBM	Gravendeel
7.8503	GBM	Gravendeel
7.1211	GBM	Gravendeel
9.1356	GBM	Gravendeel
6.1874	GBM	Gravendeel
9.2145	GBM	Gravendeel
6.5154	GBM	Gravendeel
8.772	GBM	Gravendeel
5.4522	GBM	Gravendeel
6.7402	GBM	Gravendeel
6.6991	GBM	Gravendeel
6.2926	GBM	Gravendeel
5.5687	GBM	Gravendeel
7.3498	GBM	Gravendeel
9.4977	GBM	Gravendeel
6.372	GBM	Gravendeel
9.6773	GBM	Gravendeel
9.6683	GBM	Gravendeel
8.7856	GBM	Gravendeel
8.4748	GBM	Gravendeel
8.2114	GBM	Gravendeel
7.7591	GBM	Gravendeel
6.4977	GBM	Gravendeel
9.5187	GBM	Gravendeel
7.7083	GBM	Gravendeel
8.252	GBM	Gravendeel
9.8159	GBM	Gravendeel
8.3943	GBM	Gravendeel
8.8824	GBM	Gravendeel
9.2177	GBM	Gravendeel
8.2048	GBM	Gravendeel
9.9052	GBM	Gravendeel
9.6301	GBM	Gravendeel
8.9646	GBM	Gravendeel
7.0914	GBM	Gravendeel
6.0906	GBM	Gravendeel
5.899	GBM	Gravendeel
6.164	GBM	Gravendeel
8.2634	GBM	Gravendeel
9.4124	GBM	Gravendeel
8.1212	GBM	Gravendeel
9.6882	GBM	Gravendeel
8.5983	GBM	Gravendeel
7.2357	GBM	Gravendeel
9.2942	GBM	Gravendeel
8.5856	GBM	Gravendeel
10.1337	GBM	Gravendeel
9.7559	GBM	Gravendeel
9.6451	GBM	Gravendeel
7.0716	GBM	Gravendeel
7.1858	GBM	Gravendeel
10.0715	GBM	Gravendeel
9.348	GBM	Gravendeel
9.1682	GBM	Gravendeel
8.0524	GBM	Gravendeel
9.584	GBM	Gravendeel
9.0634	GBM	Gravendeel
10.0553	GBM	Gravendeel
7.825	GBM	Gravendeel
8.8497	GBM	Gravendeel
6.9762	GBM	Gravendeel
9.7116	GBM	Gravendeel
6.5328	GBM	Gravendeel
6.4578	GBM	Gravendeel
10.1109	GBM	Gravendeel
6.302	GBM	Gravendeel
10.4896	GBM	Gravendeel
8.2366	GBM	Gravendeel
8.0965	GBM	Gravendeel
9.2386	GBM	Gravendeel
5.5436	GBM	Gravendeel
8.4687	GBM	Gravendeel
9.8268	GBM	Gravendeel
-1.16938	Control	TCGA Affymetrix
-1.07975	Control	TCGA Affymetrix
-0.536625	Control	TCGA Affymetrix
0.501375	Control	TCGA Affymetrix
-0.663125	Control	TCGA Affymetrix
-0.2935	Control	TCGA Affymetrix
-0.643375	Control	TCGA Affymetrix
-0.0005	Control	TCGA Affymetrix
-0.401125	Control	TCGA Affymetrix
-0.478875	Control	TCGA Affymetrix
6.4821	GBM	TCGA Affymetrix
7.0416	GBM	TCGA Affymetrix
9.253	GBM	TCGA Affymetrix
4.5234	GBM	TCGA Affymetrix
7.2842	GBM	TCGA Affymetrix
8.9809	GBM	TCGA Affymetrix
5.133	GBM	TCGA Affymetrix
4.6725	GBM	TCGA Affymetrix
4.8672	GBM	TCGA Affymetrix
6.3588	GBM	TCGA Affymetrix
4.4507	GBM	TCGA Affymetrix
6.7057	GBM	TCGA Affymetrix
5.0294	GBM	TCGA Affymetrix
4.3316	GBM	TCGA Affymetrix
4.2074	GBM	TCGA Affymetrix
7.0613	GBM	TCGA Affymetrix
6.878	GBM	TCGA Affymetrix
6.1626	GBM	TCGA Affymetrix
7.2019	GBM	TCGA Affymetrix
5.1816	GBM	TCGA Affymetrix
4.9955	GBM	TCGA Affymetrix
8.7325	GBM	TCGA Affymetrix
5.9032	GBM	TCGA Affymetrix
5.5645	GBM	TCGA Affymetrix
6.728	GBM	TCGA Affymetrix
6.2481	GBM	TCGA Affymetrix
7.784	GBM	TCGA Affymetrix
6.8304	GBM	TCGA Affymetrix
7.5332	GBM	TCGA Affymetrix
6.3499	GBM	TCGA Affymetrix
7.1118	GBM	TCGA Affymetrix
8.12	GBM	TCGA Affymetrix
6.3815	GBM	TCGA Affymetrix
6.0818	GBM	TCGA Affymetrix
7.3659	GBM	TCGA Affymetrix
7.0137	GBM	TCGA Affymetrix
6.3497	GBM	TCGA Affymetrix
6.0899	GBM	TCGA Affymetrix
5.8879	GBM	TCGA Affymetrix
5.346	GBM	TCGA Affymetrix
4.5983	GBM	TCGA Affymetrix
7.3478	GBM	TCGA Affymetrix
5.1186	GBM	TCGA Affymetrix
7.4049	GBM	TCGA Affymetrix
5.0445	GBM	TCGA Affymetrix
5.1469	GBM	TCGA Affymetrix
7.0577	GBM	TCGA Affymetrix
7.1983	GBM	TCGA Affymetrix
8.1651	GBM	TCGA Affymetrix
4.1307	GBM	TCGA Affymetrix
7.0967	GBM	TCGA Affymetrix
7.2251	GBM	TCGA Affymetrix
4.8664	GBM	TCGA Affymetrix
4.1012	GBM	TCGA Affymetrix
5.0562	GBM	TCGA Affymetrix
6.2632	GBM	TCGA Affymetrix
3.7129	GBM	TCGA Affymetrix
4.2901	GBM	TCGA Affymetrix
6.4805	GBM	TCGA Affymetrix
6.4954	GBM	TCGA Affymetrix
8.662	GBM	TCGA Affymetrix
5.3389	GBM	TCGA Affymetrix
5.0761	GBM	TCGA Affymetrix
7.6581	GBM	TCGA Affymetrix
8.2467	GBM	TCGA Affymetrix
8.8181	GBM	TCGA Affymetrix
6.2535	GBM	TCGA Affymetrix
7.7225	GBM	TCGA Affymetrix
6.549	GBM	TCGA Affymetrix
6.2431	GBM	TCGA Affymetrix
4.8451	GBM	TCGA Affymetrix
7.3257	GBM	TCGA Affymetrix
4.6948	GBM	TCGA Affymetrix
5.5782	GBM	TCGA Affymetrix
6.4392	GBM	TCGA Affymetrix
4.1464	GBM	TCGA Affymetrix
3.876	GBM	TCGA Affymetrix
7.1446	GBM	TCGA Affymetrix
6.1169	GBM	TCGA Affymetrix
5.3359	GBM	TCGA Affymetrix
5.8889	GBM	TCGA Affymetrix
5.4944	GBM	TCGA Affymetrix
6.892	GBM	TCGA Affymetrix
9.2219	GBM	TCGA Affymetrix
5.9881	GBM	TCGA Affymetrix
5.4061	GBM	TCGA Affymetrix
7.7352	GBM	TCGA Affymetrix
4.7977	GBM	TCGA Affymetrix
5.3077	GBM	TCGA Affymetrix
5.8453	GBM	TCGA Affymetrix
7.4429	GBM	TCGA Affymetrix
8.2574	GBM	TCGA Affymetrix
6.6817	GBM	TCGA Affymetrix
7.0525	GBM	TCGA Affymetrix
6.2768	GBM	TCGA Affymetrix
5.6054	GBM	TCGA Affymetrix
4.6817	GBM	TCGA Affymetrix
7.0701	GBM	TCGA Affymetrix
6.9862	GBM	TCGA Affymetrix
8.0743	GBM	TCGA Affymetrix
6.6693	GBM	TCGA Affymetrix
5.9572	GBM	TCGA Affymetrix
6.4174	GBM	TCGA Affymetrix
6.3754	GBM	TCGA Affymetrix
7.0418	GBM	TCGA Affymetrix
5.37	GBM	TCGA Affymetrix
10.3272	GBM	TCGA Affymetrix
5.5058	GBM	TCGA Affymetrix
4.8024	GBM	TCGA Affymetrix
7.2556	GBM	TCGA Affymetrix
6.8704	GBM	TCGA Affymetrix
6.913	GBM	TCGA Affymetrix
4.9809	GBM	TCGA Affymetrix
7.5124	GBM	TCGA Affymetrix
10.8168	GBM	TCGA Affymetrix
7.2059	GBM	TCGA Affymetrix
7.4929	GBM	TCGA Affymetrix
5.4594	GBM	TCGA Affymetrix
4.6363	GBM	TCGA Affymetrix
7.2529	GBM	TCGA Affymetrix
6.7344	GBM	TCGA Affymetrix
4.6777	GBM	TCGA Affymetrix
5.3809	GBM	TCGA Affymetrix
4.7224	GBM	TCGA Affymetrix
7.0717	GBM	TCGA Affymetrix
5.4461	GBM	TCGA Affymetrix
5.5038	GBM	TCGA Affymetrix
5.9877	GBM	TCGA Affymetrix
5.415	GBM	TCGA Affymetrix
4.366	GBM	TCGA Affymetrix
7.1884	GBM	TCGA Affymetrix
5.4476	GBM	TCGA Affymetrix
6.8953	GBM	TCGA Affymetrix
6.439	GBM	TCGA Affymetrix
5.3132	GBM	TCGA Affymetrix
6.2053	GBM	TCGA Affymetrix
6.7903	GBM	TCGA Affymetrix
6.0744	GBM	TCGA Affymetrix
7.2913	GBM	TCGA Affymetrix
7.9164	GBM	TCGA Affymetrix
5.3092	GBM	TCGA Affymetrix
7.0469	GBM	TCGA Affymetrix
5.0552	GBM	TCGA Affymetrix
6.224	GBM	TCGA Affymetrix
5.3902	GBM	TCGA Affymetrix
8.178	GBM	TCGA Affymetrix
6.0948	GBM	TCGA Affymetrix
9.402	GBM	TCGA Affymetrix
6.4421	GBM	TCGA Affymetrix
5.7353	GBM	TCGA Affymetrix
6.2798	GBM	TCGA Affymetrix
6.0075	GBM	TCGA Affymetrix
6.7111	GBM	TCGA Affymetrix
4.6788	GBM	TCGA Affymetrix
6.9926	GBM	TCGA Affymetrix
5.7531	GBM	TCGA Affymetrix
5.2549	GBM	TCGA Affymetrix
5.3938	GBM	TCGA Affymetrix
5.6839	GBM	TCGA Affymetrix
4.9032	GBM	TCGA Affymetrix
7.5696	GBM	TCGA Affymetrix
5.4294	GBM	TCGA Affymetrix
5.2037	GBM	TCGA Affymetrix
11.0147	GBM	TCGA Affymetrix
4.7192	GBM	TCGA Affymetrix
4.8378	GBM	TCGA Affymetrix
6.9455	GBM	TCGA Affymetrix
6.4481	GBM	TCGA Affymetrix
5.6785	GBM	TCGA Affymetrix
6.8058	GBM	TCGA Affymetrix
6.6044	GBM	TCGA Affymetrix
6.502	GBM	TCGA Affymetrix
4.8298	GBM	TCGA Affymetrix
7.4061	GBM	TCGA Affymetrix
5.6636	GBM	TCGA Affymetrix
7.0343	GBM	TCGA Affymetrix
5.0837	GBM	TCGA Affymetrix
6.7984	GBM	TCGA Affymetrix
9.1915	GBM	TCGA Affymetrix
4.3537	GBM	TCGA Affymetrix
7.2058	GBM	TCGA Affymetrix
7.8471	GBM	TCGA Affymetrix
6.5544	GBM	TCGA Affymetrix
5.3547	GBM	TCGA Affymetrix
6.1908	GBM	TCGA Affymetrix
7.5255	GBM	TCGA Affymetrix
5.6991	GBM	TCGA Affymetrix
7.8401	GBM	TCGA Affymetrix
6.2687	GBM	TCGA Affymetrix
6.9318	GBM	TCGA Affymetrix
7.7541	GBM	TCGA Affymetrix
5.2848	GBM	TCGA Affymetrix
5.3706	GBM	TCGA Affymetrix
7.7904	GBM	TCGA Affymetrix
4.8112	GBM	TCGA Affymetrix
8.3909	GBM	TCGA Affymetrix
5.6147	GBM	TCGA Affymetrix
7.4148	GBM	TCGA Affymetrix
8.0712	GBM	TCGA Affymetrix
6.4554	GBM	TCGA Affymetrix
6.0786	GBM	TCGA Affymetrix
6.6471	GBM	TCGA Affymetrix
7.667	GBM	TCGA Affymetrix
4.9469	GBM	TCGA Affymetrix
7.7194	GBM	TCGA Affymetrix
9.4962	GBM	TCGA Affymetrix
3.8885	GBM	TCGA Affymetrix
8.2763	GBM	TCGA Affymetrix
6.7575	GBM	TCGA Affymetrix
5.5687	GBM	TCGA Affymetrix
8.3276	GBM	TCGA Affymetrix
7.8432	GBM	TCGA Affymetrix
5.8134	GBM	TCGA Affymetrix
6.8734	GBM	TCGA Affymetrix
8.4767	GBM	TCGA Affymetrix
4.3277	GBM	TCGA Affymetrix
6.4999	GBM	TCGA Affymetrix
6.7192	GBM	TCGA Affymetrix
5.577	GBM	TCGA Affymetrix
6.096	GBM	TCGA Affymetrix
5.3057	GBM	TCGA Affymetrix
5.3931	GBM	TCGA Affymetrix
3.9819	GBM	TCGA Affymetrix
6.3332	GBM	TCGA Affymetrix
3.835	GBM	TCGA Affymetrix
8.6341	GBM	TCGA Affymetrix
4.5103	GBM	TCGA Affymetrix
6.0349	GBM	TCGA Affymetrix
7.7046	GBM	TCGA Affymetrix
7.0854	GBM	TCGA Affymetrix
4.9451	GBM	TCGA Affymetrix
6.8514	GBM	TCGA Affymetrix
5.3991	GBM	TCGA Affymetrix
4.8944	GBM	TCGA Affymetrix
7.7439	GBM	TCGA Affymetrix
7.4106	GBM	TCGA Affymetrix
7.0624	GBM	TCGA Affymetrix
9.462	GBM	TCGA Affymetrix
7.35	GBM	TCGA Affymetrix
7.9995	GBM	TCGA Affymetrix
5.6432	GBM	TCGA Affymetrix
5.2105	GBM	TCGA Affymetrix
6.7155	GBM	TCGA Affymetrix
7.583	GBM	TCGA Affymetrix
4.6264	GBM	TCGA Affymetrix
6.098	GBM	TCGA Affymetrix
5.933	GBM	TCGA Affymetrix
6.15	GBM	TCGA Affymetrix
6.1003	GBM	TCGA Affymetrix
6.8446	GBM	TCGA Affymetrix
6.126	GBM	TCGA Affymetrix
7.431	GBM	TCGA Affymetrix
7.6021	GBM	TCGA Affymetrix
6.0821	GBM	TCGA Affymetrix
7.858	GBM	TCGA Affymetrix
6.8931	GBM	TCGA Affymetrix
5.6606	GBM	TCGA Affymetrix
5.1098	GBM	TCGA Affymetrix
9.6579	GBM	TCGA Affymetrix
6.2524	GBM	TCGA Affymetrix
4.5025	GBM	TCGA Affymetrix
5.5439	GBM	TCGA Affymetrix
4.5485	GBM	TCGA Affymetrix
8.8045	GBM	TCGA Affymetrix
8.2112	GBM	TCGA Affymetrix
6.7388	GBM	TCGA Affymetrix
5.575	GBM	TCGA Affymetrix
5.5506	GBM	TCGA Affymetrix
7.2036	GBM	TCGA Affymetrix
5.2135	GBM	TCGA Affymetrix
8.0537	GBM	TCGA Affymetrix
6.2766	GBM	TCGA Affymetrix
5.4645	GBM	TCGA Affymetrix
4.7674	GBM	TCGA Affymetrix
6.3051	GBM	TCGA Affymetrix
8.7997	GBM	TCGA Affymetrix
8.4448	GBM	TCGA Affymetrix
6.9432	GBM	TCGA Affymetrix
5.1985	GBM	TCGA Affymetrix
4.6138	GBM	TCGA Affymetrix
6.4349	GBM	TCGA Affymetrix
6.7904	GBM	TCGA Affymetrix
7.1984	GBM	TCGA Affymetrix
5.7543	GBM	TCGA Affymetrix
5.1306	GBM	TCGA Affymetrix
5.7912	GBM	TCGA Affymetrix
4.5254	GBM	TCGA Affymetrix
7.0166	GBM	TCGA Affymetrix
6.2835	GBM	TCGA Affymetrix
8.0995	GBM	TCGA Affymetrix
4.8331	GBM	TCGA Affymetrix
6.0936	GBM	TCGA Affymetrix
7.2405	GBM	TCGA Affymetrix
7.2104	GBM	TCGA Affymetrix
5.8941	GBM	TCGA Affymetrix
7.1001	GBM	TCGA Affymetrix
9.1652	GBM	TCGA Affymetrix
6.4171	GBM	TCGA Affymetrix
7.1214	GBM	TCGA Affymetrix
4.8648	GBM	TCGA Affymetrix
6.7845	GBM	TCGA Affymetrix
5.3323	GBM	TCGA Affymetrix
6.3217	GBM	TCGA Affymetrix
5.7174	GBM	TCGA Affymetrix
5.2871	GBM	TCGA Affymetrix
4.9689	GBM	TCGA Affymetrix
8.4622	GBM	TCGA Affymetrix
6.9216	GBM	TCGA Affymetrix
4.8018	GBM	TCGA Affymetrix
6.9973	GBM	TCGA Affymetrix
3.994	GBM	TCGA Affymetrix
4.3957	GBM	TCGA Affymetrix
6.0648	GBM	TCGA Affymetrix
6.846	GBM	TCGA Affymetrix
7.3499	GBM	TCGA Affymetrix
5.4672	GBM	TCGA Affymetrix
7.7682	GBM	TCGA Affymetrix
4.1047	GBM	TCGA Affymetrix
4.8141	GBM	TCGA Affymetrix
6.1507	GBM	TCGA Affymetrix
7.807	GBM	TCGA Affymetrix
9.0021	GBM	TCGA Affymetrix
7.8485	GBM	TCGA Affymetrix
6.7212	GBM	TCGA Affymetrix
7.6114	GBM	TCGA Affymetrix
6.3416	GBM	TCGA Affymetrix
8.0264	GBM	TCGA Affymetrix
8.7984	GBM	TCGA Affymetrix
5.8006	GBM	TCGA Affymetrix
8.1644	GBM	TCGA Affymetrix
7.3008	GBM	TCGA Affymetrix
4.8827	GBM	TCGA Affymetrix
6.7476	GBM	TCGA Affymetrix
6.2337	GBM	TCGA Affymetrix
10.2168	GBM	TCGA Affymetrix
6.5727	GBM	TCGA Affymetrix
7.9028	GBM	TCGA Affymetrix
6.2845	GBM	TCGA Affymetrix
8.261	GBM	TCGA Affymetrix
5.3378	GBM	TCGA Affymetrix
5.4945	GBM	TCGA Affymetrix
9.495	GBM	TCGA Affymetrix
4.5662	GBM	TCGA Affymetrix
4.477	GBM	TCGA Affymetrix
5.7615	GBM	TCGA Affymetrix
5.2413	GBM	TCGA Affymetrix
4.2117	GBM	TCGA Affymetrix
8.102	GBM	TCGA Affymetrix
6.9813	GBM	TCGA Affymetrix
5.6817	GBM	TCGA Affymetrix
4.4056	GBM	TCGA Affymetrix
8.1012	GBM	TCGA Affymetrix
5.1784	GBM	TCGA Affymetrix
6.3748	GBM	TCGA Affymetrix
6.6497	GBM	TCGA Affymetrix
6.0336	GBM	TCGA Affymetrix
7.8109	GBM	TCGA Affymetrix
6.2452	GBM	TCGA Affymetrix
4.9286	GBM	TCGA Affymetrix
4.2971	GBM	TCGA Affymetrix
4.3527	GBM	TCGA Affymetrix
4.059	GBM	TCGA Affymetrix
6.7098	GBM	TCGA Affymetrix
5.9071	GBM	TCGA Affymetrix
5.8496	GBM	TCGA Affymetrix
5.0693	GBM	TCGA Affymetrix
6.4459	GBM	TCGA Affymetrix
3.8942	GBM	TCGA Affymetrix
3.8813	GBM	TCGA Affymetrix
7.3228	GBM	TCGA Affymetrix
7.1949	GBM	TCGA Affymetrix
7.4327	GBM	TCGA Affymetrix
8.3336	GBM	TCGA Affymetrix
9.279	GBM	TCGA Affymetrix
5.2509	GBM	TCGA Affymetrix
6.0297	GBM	TCGA Affymetrix
7.8064	GBM	TCGA Affymetrix
7.1359	GBM	TCGA Affymetrix
5.218	GBM	TCGA Affymetrix
5.2727	GBM	TCGA Affymetrix
4.75	GBM	TCGA Affymetrix
4.9699	GBM	TCGA Affymetrix
7.3771	GBM	TCGA Affymetrix
5.9456	GBM	TCGA Affymetrix
4.5039	GBM	TCGA Affymetrix
8.477	GBM	TCGA Affymetrix
6.6258	GBM	TCGA Affymetrix
6.066	GBM	TCGA Affymetrix
4.8971	GBM	TCGA Affymetrix
7.482	GBM	TCGA Affymetrix
4.3019	GBM	TCGA Affymetrix
4.7466	GBM	TCGA Affymetrix
8.8165	GBM	TCGA Affymetrix
5.0083	GBM	TCGA Affymetrix
5.4573	GBM	TCGA Affymetrix
5.4462	GBM	TCGA Affymetrix
8.1552	GBM	TCGA Affymetrix
8.6934	GBM	TCGA Affymetrix
4.2127	GBM	TCGA Affymetrix
5.5249	GBM	TCGA Affymetrix
6.9233	GBM	TCGA Affymetrix
7.2506	GBM	TCGA Affymetrix
5.7454	GBM	TCGA Affymetrix
7.5301	GBM	TCGA Affymetrix
5.7087	GBM	TCGA Affymetrix
5.756	GBM	TCGA Affymetrix
7.8541	GBM	TCGA Affymetrix
8.0139	GBM	TCGA Affymetrix
5.5394	GBM	TCGA Affymetrix
6.3477	GBM	TCGA Affymetrix
8.321	GBM	TCGA Affymetrix
5.807	GBM	TCGA Affymetrix
8.3596	GBM	TCGA Affymetrix
4.2487	GBM	TCGA Affymetrix
5.8543	GBM	TCGA Affymetrix
7.1318	GBM	TCGA Affymetrix
4.9619	GBM	TCGA Affymetrix
7.0391	GBM	TCGA Affymetrix
7.4048	GBM	TCGA Affymetrix
9.4702	GBM	TCGA Affymetrix
4.4067	GBM	TCGA Affymetrix
7.1607	GBM	TCGA Affymetrix
7.7006	GBM	TCGA Affymetrix
8.3827	GBM	TCGA Affymetrix
4.8681	GBM	TCGA Affymetrix
6.5615	GBM	TCGA Affymetrix
5.2614	GBM	TCGA Affymetrix
4.8918	GBM	TCGA Affymetrix
7.2648	GBM	TCGA Affymetrix
7.354	GBM	TCGA Affymetrix
8.0947	GBM	TCGA Affymetrix
8.316	GBM	TCGA Affymetrix
6.0781	GBM	TCGA Affymetrix
7.8542	GBM	TCGA Affymetrix
8.8277	GBM	TCGA Affymetrix
5.0623	GBM	TCGA Affymetrix
8.4401	GBM	TCGA Affymetrix
6.066	GBM	TCGA Affymetrix
6.7449	GBM	TCGA Affymetrix
6.0854	GBM	TCGA Affymetrix
5.9381	GBM	TCGA Affymetrix
5.613	GBM	TCGA Affymetrix
7.2266	GBM	TCGA Affymetrix
5.7352	GBM	TCGA Affymetrix
6.3959	GBM	TCGA Affymetrix
7.9262	GBM	TCGA Affymetrix
7.1436	GBM	TCGA Affymetrix
3.8473	GBM	TCGA Affymetrix
6.3563	GBM	TCGA Affymetrix
7.1553	GBM	TCGA Affymetrix
7.5698	GBM	TCGA Affymetrix
6.8248	GBM	TCGA Affymetrix
7.0161	GBM	TCGA Affymetrix
7.923	GBM	TCGA Affymetrix
7.3379	GBM	TCGA Affymetrix
5.2921	GBM	TCGA Affymetrix
7.6445	GBM	TCGA Affymetrix
5.6464	GBM	TCGA Affymetrix
5.5842	GBM	TCGA Affymetrix
7.5624	GBM	TCGA Affymetrix
5.4168	GBM	TCGA Affymetrix
6.0984	GBM	TCGA Affymetrix
5.4562	GBM	TCGA Affymetrix
7.6978	GBM	TCGA Affymetrix
6.206	GBM	TCGA Affymetrix
3.7252	GBM	TCGA Affymetrix
7.5338	GBM	TCGA Affymetrix
7.5396	GBM	TCGA Affymetrix
6.1279	GBM	TCGA Affymetrix
6.3464	GBM	TCGA Affymetrix
6.8449	GBM	TCGA Affymetrix
6.4949	GBM	TCGA Affymetrix
5.2828	GBM	TCGA Affymetrix
7.9586	GBM	TCGA Affymetrix
5.9132	GBM	TCGA Affymetrix
6.9154	GBM	TCGA Affymetrix
4.7458	GBM	TCGA Affymetrix
6.7493	GBM	TCGA Affymetrix
4.7473	GBM	TCGA Affymetrix
5.6778	GBM	TCGA Affymetrix
7.2913	GBM	TCGA Affymetrix
3.9556	GBM	TCGA Affymetrix
6.6861	GBM	TCGA Affymetrix
6.7235	GBM	TCGA Affymetrix
9.2316	GBM	TCGA Affymetrix
6.693	GBM	TCGA Affymetrix
5.2592	GBM	TCGA Affymetrix
7.3551	GBM	TCGA Affymetrix
7.0396	GBM	TCGA Affymetrix
6.137	GBM	TCGA Affymetrix
5.1718	GBM	TCGA Affymetrix
5.6174	GBM	TCGA Affymetrix
4.6819	GBM	TCGA Affymetrix
11.5106	GBM	TCGA Affymetrix
5.866	GBM	TCGA Affymetrix
5.8639	GBM	TCGA Affymetrix
4.5776	GBM	TCGA Affymetrix
7.9413	GBM	TCGA Affymetrix
6.0247	GBM	TCGA Affymetrix
8.4173	GBM	TCGA Affymetrix
10.2829	GBM	TCGA Affymetrix
5.6802	GBM	TCGA Affymetrix
8.6114	GBM	TCGA Affymetrix
4.5146	GBM	TCGA Affymetrix
5.6295	GBM	TCGA Affymetrix
5.4037	GBM	TCGA Affymetrix
6.2381	GBM	TCGA Affymetrix
5.2997	GBM	TCGA Affymetrix
5.9939	GBM	TCGA Affymetrix
6.1292	GBM	TCGA Affymetrix
5.7428	GBM	TCGA Affymetrix
6.3587	GBM	TCGA Affymetrix
4.5896	GBM	TCGA Affymetrix
6.4483	GBM	TCGA Affymetrix
5.0175	GBM	TCGA Affymetrix
5.8384	GBM	TCGA Affymetrix
7.7498	GBM	TCGA Affymetrix
8.366	GBM	TCGA Affymetrix
5.2008	GBM	TCGA Affymetrix
6.5451	GBM	TCGA Affymetrix
5.3275	GBM	TCGA Affymetrix
5.4223	GBM	TCGA Affymetrix
7.2845	GBM	TCGA Affymetrix
5.8632	GBM	TCGA Affymetrix
7.3654	GBM	TCGA Affymetrix
6.8772	GBM	TCGA Affymetrix
5.5151	GBM	TCGA Affymetrix
5.314	GBM	TCGA Affymetrix
0.985	Control	TCGA Agilent
2.238	Control	TCGA Agilent
2.41562	Control	TCGA Agilent
3.23525	Control	TCGA Agilent
2.41188	Control	TCGA Agilent
1.98625	Control	TCGA Agilent
1.80662	Control	TCGA Agilent
3.2685	Control	TCGA Agilent
1.92112	Control	TCGA Agilent
2.4945	Control	TCGA Agilent
5.03375	GBM	TCGA Agilent
3.967	GBM	TCGA Agilent
5.3565	GBM	TCGA Agilent
6.37362	GBM	TCGA Agilent
3.93388	GBM	TCGA Agilent
-0.665875	GBM	TCGA Agilent
-0.469375	GBM	TCGA Agilent
0.597875	GBM	TCGA Agilent
1.9845	GBM	TCGA Agilent
3.13287	GBM	TCGA Agilent
4.97975	GBM	TCGA Agilent
3.762	GBM	TCGA Agilent
2.15025	GBM	TCGA Agilent
2.08188	GBM	TCGA Agilent
0.952	GBM	TCGA Agilent
3.0815	GBM	TCGA Agilent
0.076	GBM	TCGA Agilent
3.55675	GBM	TCGA Agilent
5.01112	GBM	TCGA Agilent
3.33012	GBM	TCGA Agilent
2.51363	GBM	TCGA Agilent
3.19512	GBM	TCGA Agilent
2.106	GBM	TCGA Agilent
0.763	GBM	TCGA Agilent
4.35275	GBM	TCGA Agilent
3.309	GBM	TCGA Agilent
1.79612	GBM	TCGA Agilent
3.73238	GBM	TCGA Agilent
3.25375	GBM	TCGA Agilent
0.11625	GBM	TCGA Agilent
3.70288	GBM	TCGA Agilent
-0.02175	GBM	TCGA Agilent
4.29175	GBM	TCGA Agilent
3.13888	GBM	TCGA Agilent
4.895	GBM	TCGA Agilent
4.00237	GBM	TCGA Agilent
3.9415	GBM	TCGA Agilent
3.64938	GBM	TCGA Agilent
3.441	GBM	TCGA Agilent
3.06438	GBM	TCGA Agilent
1.77163	GBM	TCGA Agilent
5.007	GBM	TCGA Agilent
3.053	GBM	TCGA Agilent
5.30175	GBM	TCGA Agilent
2.41463	GBM	TCGA Agilent
2.3085	GBM	TCGA Agilent
4.88837	GBM	TCGA Agilent
4.83025	GBM	TCGA Agilent
5.59075	GBM	TCGA Agilent
0.842375	GBM	TCGA Agilent
4.03137	GBM	TCGA Agilent
5.0725	GBM	TCGA Agilent
1.97162	GBM	TCGA Agilent
0.7915	GBM	TCGA Agilent
-0.910875	GBM	TCGA Agilent
3.962	GBM	TCGA Agilent
4.42237	GBM	TCGA Agilent
0.19625	GBM	TCGA Agilent
3.57025	GBM	TCGA Agilent
4.16937	GBM	TCGA Agilent
5.36113	GBM	TCGA Agilent
2.71163	GBM	TCGA Agilent
1.49087	GBM	TCGA Agilent
4.66425	GBM	TCGA Agilent
4.95162	GBM	TCGA Agilent
5.91937	GBM	TCGA Agilent
3.72587	GBM	TCGA Agilent
4.826	GBM	TCGA Agilent
4.7425	GBM	TCGA Agilent
3.76325	GBM	TCGA Agilent
1.43625	GBM	TCGA Agilent
4.45638	GBM	TCGA Agilent
1.87138	GBM	TCGA Agilent
3.47425	GBM	TCGA Agilent
3.75862	GBM	TCGA Agilent
-0.521875	GBM	TCGA Agilent
1.05675	GBM	TCGA Agilent
4.4505	GBM	TCGA Agilent
3.424	GBM	TCGA Agilent
0.292625	GBM	TCGA Agilent
3.437	GBM	TCGA Agilent
2.51938	GBM	TCGA Agilent
3.94075	GBM	TCGA Agilent
4.89712	GBM	TCGA Agilent
3.30912	GBM	TCGA Agilent
2.36937	GBM	TCGA Agilent
5.59225	GBM	TCGA Agilent
1.21125	GBM	TCGA Agilent
3.31875	GBM	TCGA Agilent
3.81212	GBM	TCGA Agilent
4.99913	GBM	TCGA Agilent
5.5415	GBM	TCGA Agilent
4.28175	GBM	TCGA Agilent
4.36562	GBM	TCGA Agilent
3.42125	GBM	TCGA Agilent
3.1	GBM	TCGA Agilent
-0.500625	GBM	TCGA Agilent
4.76588	GBM	TCGA Agilent
4.32038	GBM	TCGA Agilent
5.34563	GBM	TCGA Agilent
5.36313	GBM	TCGA Agilent
3.8475	GBM	TCGA Agilent
4.49012	GBM	TCGA Agilent
4.10225	GBM	TCGA Agilent
4.83025	GBM	TCGA Agilent
3.01162	GBM	TCGA Agilent
6.54188	GBM	TCGA Agilent
3.54575	GBM	TCGA Agilent
1.4695	GBM	TCGA Agilent
4.61688	GBM	TCGA Agilent
4.02837	GBM	TCGA Agilent
4.2745	GBM	TCGA Agilent
2.939	GBM	TCGA Agilent
4.63625	GBM	TCGA Agilent
5.89963	GBM	TCGA Agilent
4.81112	GBM	TCGA Agilent
4.90712	GBM	TCGA Agilent
2.864	GBM	TCGA Agilent
1.00087	GBM	TCGA Agilent
5.05625	GBM	TCGA Agilent
4.01825	GBM	TCGA Agilent
1.57688	GBM	TCGA Agilent
2.26737	GBM	TCGA Agilent
1.46738	GBM	TCGA Agilent
4.31463	GBM	TCGA Agilent
2.72737	GBM	TCGA Agilent
3.05325	GBM	TCGA Agilent
3.57325	GBM	TCGA Agilent
2.537	GBM	TCGA Agilent
0.11275	GBM	TCGA Agilent
4.30387	GBM	TCGA Agilent
1.88675	GBM	TCGA Agilent
4.028	GBM	TCGA Agilent
3.72325	GBM	TCGA Agilent
3.05163	GBM	TCGA Agilent
3.42013	GBM	TCGA Agilent
4.43575	GBM	TCGA Agilent
3.59362	GBM	TCGA Agilent
4.63825	GBM	TCGA Agilent
4.8135	GBM	TCGA Agilent
2.80812	GBM	TCGA Agilent
4.25962	GBM	TCGA Agilent
2.15537	GBM	TCGA Agilent
3.98575	GBM	TCGA Agilent
0.137125	GBM	TCGA Agilent
5.35787	GBM	TCGA Agilent
3.86137	GBM	TCGA Agilent
6.53725	GBM	TCGA Agilent
2.95838	GBM	TCGA Agilent
4.68088	GBM	TCGA Agilent
4.0045	GBM	TCGA Agilent
1.60337	GBM	TCGA Agilent
3.73037	GBM	TCGA Agilent
0.3855	GBM	TCGA Agilent
4.61463	GBM	TCGA Agilent
2.94512	GBM	TCGA Agilent
2.98612	GBM	TCGA Agilent
2.76213	GBM	TCGA Agilent
2.08738	GBM	TCGA Agilent
1.029	GBM	TCGA Agilent
4.27925	GBM	TCGA Agilent
3.01875	GBM	TCGA Agilent
1.4875	GBM	TCGA Agilent
5.84788	GBM	TCGA Agilent
1.74025	GBM	TCGA Agilent
1.60838	GBM	TCGA Agilent
4.23337	GBM	TCGA Agilent
3.94062	GBM	TCGA Agilent
2.91012	GBM	TCGA Agilent
3.85637	GBM	TCGA Agilent
3.75712	GBM	TCGA Agilent
2.421	GBM	TCGA Agilent
4.88788	GBM	TCGA Agilent
3.466	GBM	TCGA Agilent
4.2695	GBM	TCGA Agilent
3.03375	GBM	TCGA Agilent
4.247	GBM	TCGA Agilent
5.4065	GBM	TCGA Agilent
1.247	GBM	TCGA Agilent
4.452	GBM	TCGA Agilent
5.01088	GBM	TCGA Agilent
3.80837	GBM	TCGA Agilent
2.452	GBM	TCGA Agilent
4.11337	GBM	TCGA Agilent
4.64787	GBM	TCGA Agilent
2.92175	GBM	TCGA Agilent
5.34225	GBM	TCGA Agilent
4.44075	GBM	TCGA Agilent
4.57637	GBM	TCGA Agilent
5.417	GBM	TCGA Agilent
2.42	GBM	TCGA Agilent
3.60787	GBM	TCGA Agilent
2.67612	GBM	TCGA Agilent
5.23562	GBM	TCGA Agilent
3.22063	GBM	TCGA Agilent
4.85288	GBM	TCGA Agilent
5.53437	GBM	TCGA Agilent
4.30087	GBM	TCGA Agilent
3.90638	GBM	TCGA Agilent
4.36975	GBM	TCGA Agilent
4.88488	GBM	TCGA Agilent
2.29688	GBM	TCGA Agilent
4.93562	GBM	TCGA Agilent
5.84425	GBM	TCGA Agilent
0.018625	GBM	TCGA Agilent
3.82863	GBM	TCGA Agilent
4.727	GBM	TCGA Agilent
6.01788	GBM	TCGA Agilent
0.44025	GBM	TCGA Agilent
4.52837	GBM	TCGA Agilent
3.54663	GBM	TCGA Agilent
0.099375	GBM	TCGA Agilent
4.61675	GBM	TCGA Agilent
-0.127	GBM	TCGA Agilent
3.41475	GBM	TCGA Agilent
4.17762	GBM	TCGA Agilent
4.32538	GBM	TCGA Agilent
1.31175	GBM	TCGA Agilent
4.08913	GBM	TCGA Agilent
3.10875	GBM	TCGA Agilent
1.82937	GBM	TCGA Agilent
4.643	GBM	TCGA Agilent
4.47412	GBM	TCGA Agilent
3.76375	GBM	TCGA Agilent
4.7045	GBM	TCGA Agilent
4.44375	GBM	TCGA Agilent
4.75263	GBM	TCGA Agilent
3.74713	GBM	TCGA Agilent
2.02738	GBM	TCGA Agilent
3.92925	GBM	TCGA Agilent
4.499	GBM	TCGA Agilent
1.5115	GBM	TCGA Agilent
3.77913	GBM	TCGA Agilent
2.86238	GBM	TCGA Agilent
3.31513	GBM	TCGA Agilent
3.15837	GBM	TCGA Agilent
4.01075	GBM	TCGA Agilent
3.17263	GBM	TCGA Agilent
4.70275	GBM	TCGA Agilent
5.611	GBM	TCGA Agilent
3.5225	GBM	TCGA Agilent
4.66625	GBM	TCGA Agilent
4.1555	GBM	TCGA Agilent
0.92625	GBM	TCGA Agilent
2.3835	GBM	TCGA Agilent
5.6295	GBM	TCGA Agilent
3.76788	GBM	TCGA Agilent
0.515625	GBM	TCGA Agilent
2.65512	GBM	TCGA Agilent
1.15675	GBM	TCGA Agilent
5.56313	GBM	TCGA Agilent
4.63537	GBM	TCGA Agilent
3.87862	GBM	TCGA Agilent
3.75762	GBM	TCGA Agilent
2.261	GBM	TCGA Agilent
4.422	GBM	TCGA Agilent
2.18075	GBM	TCGA Agilent
4.624	GBM	TCGA Agilent
3.79	GBM	TCGA Agilent
2.85925	GBM	TCGA Agilent
2.08025	GBM	TCGA Agilent
3.08162	GBM	TCGA Agilent
5.21687	GBM	TCGA Agilent
5.44825	GBM	TCGA Agilent
4.5075	GBM	TCGA Agilent
2.5255	GBM	TCGA Agilent
1.00287	GBM	TCGA Agilent
4.50125	GBM	TCGA Agilent
4.04475	GBM	TCGA Agilent
4.296	GBM	TCGA Agilent
3.53238	GBM	TCGA Agilent
2.0795	GBM	TCGA Agilent
2.938	GBM	TCGA Agilent
0.341875	GBM	TCGA Agilent
4.29025	GBM	TCGA Agilent
3.4915	GBM	TCGA Agilent
4.5595	GBM	TCGA Agilent
1.98025	GBM	TCGA Agilent
4.14313	GBM	TCGA Agilent
4.18963	GBM	TCGA Agilent
4.47325	GBM	TCGA Agilent
4.08263	GBM	TCGA Agilent
4.65538	GBM	TCGA Agilent
5.626	GBM	TCGA Agilent
4.26975	GBM	TCGA Agilent
4.99587	GBM	TCGA Agilent
2.21475	GBM	TCGA Agilent
4.54812	GBM	TCGA Agilent
3.59587	GBM	TCGA Agilent
4.51288	GBM	TCGA Agilent
4.43313	GBM	TCGA Agilent
3.027	GBM	TCGA Agilent
2.96638	GBM	TCGA Agilent
6.1435	GBM	TCGA Agilent
4.75962	GBM	TCGA Agilent
2.04513	GBM	TCGA Agilent
5.135	GBM	TCGA Agilent
0.61475	GBM	TCGA Agilent
1.87062	GBM	TCGA Agilent
4.234	GBM	TCGA Agilent
4.98337	GBM	TCGA Agilent
5.381	GBM	TCGA Agilent
3.62075	GBM	TCGA Agilent
7.08425	GBM	TCGA Agilent
0.359875	GBM	TCGA Agilent
1.897	GBM	TCGA Agilent
3.9795	GBM	TCGA Agilent
5.5605	GBM	TCGA Agilent
5.4765	GBM	TCGA Agilent
4.8755	GBM	TCGA Agilent
4.96612	GBM	TCGA Agilent
3.89588	GBM	TCGA Agilent
4.677	GBM	TCGA Agilent
5.893	GBM	TCGA Agilent
3.86163	GBM	TCGA Agilent
4.88563	GBM	TCGA Agilent
5.35262	GBM	TCGA Agilent
2.598	GBM	TCGA Agilent
4.756	GBM	TCGA Agilent
3.69837	GBM	TCGA Agilent
5.58925	GBM	TCGA Agilent
4.51837	GBM	TCGA Agilent
5.31463	GBM	TCGA Agilent
3.91475	GBM	TCGA Agilent
5.16275	GBM	TCGA Agilent
3.97262	GBM	TCGA Agilent
4.004	GBM	TCGA Agilent
5.51462	GBM	TCGA Agilent
2.08263	GBM	TCGA Agilent
1.987	GBM	TCGA Agilent
2.38638	GBM	TCGA Agilent
2.17013	GBM	TCGA Agilent
1.23412	GBM	TCGA Agilent
5.29563	GBM	TCGA Agilent
4.9065	GBM	TCGA Agilent
3.37725	GBM	TCGA Agilent
-1.28087	GBM	TCGA Agilent
5.60288	GBM	TCGA Agilent
2.82388	GBM	TCGA Agilent
4.6705	GBM	TCGA Agilent
5.32038	GBM	TCGA Agilent
4.11062	GBM	TCGA Agilent
5.40613	GBM	TCGA Agilent
4.25962	GBM	TCGA Agilent
-0.193375	GBM	TCGA Agilent
-0.93275	GBM	TCGA Agilent
1.94875	GBM	TCGA Agilent
4.731	GBM	TCGA Agilent
3.84187	GBM	TCGA Agilent
3.62625	GBM	TCGA Agilent
2.59413	GBM	TCGA Agilent
4.03163	GBM	TCGA Agilent
-0.144625	GBM	TCGA Agilent
-0.768125	GBM	TCGA Agilent
4.798	GBM	TCGA Agilent
4.76875	GBM	TCGA Agilent
4.838	GBM	TCGA Agilent
5.59075	GBM	TCGA Agilent
5.248	GBM	TCGA Agilent
3.29137	GBM	TCGA Agilent
4.06112	GBM	TCGA Agilent
5.13912	GBM	TCGA Agilent
4.45162	GBM	TCGA Agilent
2.53325	GBM	TCGA Agilent
1.78163	GBM	TCGA Agilent
2.47225	GBM	TCGA Agilent
2.375	GBM	TCGA Agilent
4.87413	GBM	TCGA Agilent
3.92512	GBM	TCGA Agilent
1.45788	GBM	TCGA Agilent
5.77813	GBM	TCGA Agilent
4.36375	GBM	TCGA Agilent
4.24637	GBM	TCGA Agilent
2.627	GBM	TCGA Agilent
4.9635	GBM	TCGA Agilent
0.71625	GBM	TCGA Agilent
1.27675	GBM	TCGA Agilent
5.79138	GBM	TCGA Agilent
2.72162	GBM	TCGA Agilent
1.45525	GBM	TCGA Agilent
1.63062	GBM	TCGA Agilent
5.78062	GBM	TCGA Agilent
5.94688	GBM	TCGA Agilent
0.40225	GBM	TCGA Agilent
2.99025	GBM	TCGA Agilent
5.0465	GBM	TCGA Agilent
4.37125	GBM	TCGA Agilent
3.881	GBM	TCGA Agilent
4.77438	GBM	TCGA Agilent
3.51388	GBM	TCGA Agilent
3.32063	GBM	TCGA Agilent
5.67	GBM	TCGA Agilent
4.43575	GBM	TCGA Agilent
5.24388	GBM	TCGA Agilent
5.79713	GBM	TCGA Agilent
4.99838	GBM	TCGA Agilent
5.79175	GBM	TCGA Agilent
5.62162	GBM	TCGA Agilent
2.64125	GBM	TCGA Agilent
5.0425	GBM	TCGA Agilent
3.1405	GBM	TCGA Agilent
5.3545	GBM	TCGA Agilent
4.99362	GBM	TCGA Agilent
5.00462	GBM	TCGA Agilent
6.025	GBM	TCGA Agilent
6.03325	GBM	TCGA Agilent
4.19838	GBM	TCGA Agilent
5.6935	GBM	TCGA Agilent
5.5705	GBM	TCGA Agilent
2.401	GBM	TCGA Agilent
5.53012	GBM	TCGA Agilent
4.07512	GBM	TCGA Agilent
4.90375	GBM	TCGA Agilent
3.87787	GBM	TCGA Agilent
4.05187	GBM	TCGA Agilent
3.1925	GBM	TCGA Agilent
5.26513	GBM	TCGA Agilent
3.65837	GBM	TCGA Agilent
4.49538	GBM	TCGA Agilent
5.487	GBM	TCGA Agilent
2.93375	GBM	TCGA Agilent
0.736	GBM	TCGA Agilent
4.24862	GBM	TCGA Agilent
5.26312	GBM	TCGA Agilent
5.66062	GBM	TCGA Agilent
5.12175	GBM	TCGA Agilent
5.27975	GBM	TCGA Agilent
4.90475	GBM	TCGA Agilent
5.80925	GBM	TCGA Agilent
2.97662	GBM	TCGA Agilent
5.4065	GBM	TCGA Agilent
3.76225	GBM	TCGA Agilent
5.44712	GBM	TCGA Agilent
3.39438	GBM	TCGA Agilent
3.88325	GBM	TCGA Agilent
5.24937	GBM	TCGA Agilent
3.86013	GBM	TCGA Agilent
3.83562	GBM	TCGA Agilent
5.11825	GBM	TCGA Agilent
5.0195	GBM	TCGA Agilent
6.15512	GBM	TCGA Agilent
4.75	GBM	TCGA Agilent
3.61212	GBM	TCGA Agilent
4.22125	GBM	TCGA Agilent
4.9135	GBM	TCGA Agilent
6.548	GBM	TCGA Agilent
3.8595	GBM	TCGA Agilent
7.14787	GBM	TCGA Agilent
4.29175	GBM	TCGA Agilent
2.42475	GBM	TCGA Agilent
5.26513	GBM	TCGA Agilent
5.15813	GBM	TCGA Agilent
2.1985	GBM	TCGA Agilent
7.24287	GBM	TCGA Agilent
4.32388	GBM	TCGA Agilent
3.32088	GBM	TCGA Agilent
5.22687	GBM	TCGA Agilent
4.694	GBM	TCGA Agilent
4.291	GBM	TCGA Agilent
2.3995	GBM	TCGA Agilent
3.78337	GBM	TCGA Agilent
1.907	GBM	TCGA Agilent
5.75325	GBM	TCGA Agilent
3.77025	GBM	TCGA Agilent
3.36	GBM	TCGA Agilent
1.75063	GBM	TCGA Agilent
5.74975	GBM	TCGA Agilent
3.71362	GBM	TCGA Agilent
5.83387	GBM	TCGA Agilent
7.21988	GBM	TCGA Agilent
1.71588	GBM	TCGA Agilent
6.14375	GBM	TCGA Agilent
1.71538	GBM	TCGA Agilent
3.71937	GBM	TCGA Agilent
2.9955	GBM	TCGA Agilent
4.213	GBM	TCGA Agilent
2.68662	GBM	TCGA Agilent
3.86362	GBM	TCGA Agilent
4.064	GBM	TCGA Agilent
4.26425	GBM	TCGA Agilent
3.05262	GBM	TCGA Agilent
4.00087	GBM	TCGA Agilent
4.039	GBM	TCGA Agilent
4.77412	GBM	TCGA Agilent
4.93225	GBM	TCGA Agilent
4.92075	GBM	TCGA Agilent
5.83287	GBM	TCGA Agilent
2.74162	GBM	TCGA Agilent
3.43975	GBM	TCGA Agilent
6.26671	Control	TCGA Rnaseq
7.05521	Control	TCGA Rnaseq
7.36757	Control	TCGA Rnaseq
7.39391	Control	TCGA Rnaseq
5.14864	GBM	TCGA Rnaseq
5.16737	GBM	TCGA Rnaseq
5.52923	GBM	TCGA Rnaseq
5.88705	GBM	TCGA Rnaseq
5.93426	GBM	TCGA Rnaseq
5.98172	GBM	TCGA Rnaseq
6.00707	GBM	TCGA Rnaseq
6.20777	GBM	TCGA Rnaseq
6.31042	GBM	TCGA Rnaseq
6.49497	GBM	TCGA Rnaseq
6.53827	GBM	TCGA Rnaseq
6.80603	GBM	TCGA Rnaseq
6.99362	GBM	TCGA Rnaseq
7.26851	GBM	TCGA Rnaseq
7.35177	GBM	TCGA Rnaseq
7.49005	GBM	TCGA Rnaseq
7.74297	GBM	TCGA Rnaseq
7.95597	GBM	TCGA Rnaseq
7.99934	GBM	TCGA Rnaseq
8.01137	GBM	TCGA Rnaseq
8.18385	GBM	TCGA Rnaseq
8.20959	GBM	TCGA Rnaseq
8.23122	GBM	TCGA Rnaseq
8.25605	GBM	TCGA Rnaseq
8.25973	GBM	TCGA Rnaseq
8.2839	GBM	TCGA Rnaseq
8.29972	GBM	TCGA Rnaseq
8.32333	GBM	TCGA Rnaseq
8.35351	GBM	TCGA Rnaseq
8.41097	GBM	TCGA Rnaseq
8.43275	GBM	TCGA Rnaseq
8.48615	GBM	TCGA Rnaseq
8.54609	GBM	TCGA Rnaseq
8.62674	GBM	TCGA Rnaseq
8.64909	GBM	TCGA Rnaseq
8.69299	GBM	TCGA Rnaseq
8.7292	GBM	TCGA Rnaseq
8.74925	GBM	TCGA Rnaseq
8.76916	GBM	TCGA Rnaseq
8.83965	GBM	TCGA Rnaseq
8.87006	GBM	TCGA Rnaseq
8.94062	GBM	TCGA Rnaseq
8.98115	GBM	TCGA Rnaseq
8.9968	GBM	TCGA Rnaseq
9.05035	GBM	TCGA Rnaseq
9.09613	GBM	TCGA Rnaseq
9.11849	GBM	TCGA Rnaseq
9.12938	GBM	TCGA Rnaseq
9.15726	GBM	TCGA Rnaseq
9.1739	GBM	TCGA Rnaseq
9.1754	GBM	TCGA Rnaseq
9.23157	GBM	TCGA Rnaseq
9.26093	GBM	TCGA Rnaseq
9.30386	GBM	TCGA Rnaseq
9.31513	GBM	TCGA Rnaseq
9.33426	GBM	TCGA Rnaseq
9.35622	GBM	TCGA Rnaseq
9.35993	GBM	TCGA Rnaseq
9.37139	GBM	TCGA Rnaseq
9.38745	GBM	TCGA Rnaseq
9.39219	GBM	TCGA Rnaseq
9.43039	GBM	TCGA Rnaseq
9.4355	GBM	TCGA Rnaseq
9.46628	GBM	TCGA Rnaseq
9.54695	GBM	TCGA Rnaseq
9.5712	GBM	TCGA Rnaseq
9.60578	GBM	TCGA Rnaseq
9.61994	GBM	TCGA Rnaseq
9.63235	GBM	TCGA Rnaseq
9.65216	GBM	TCGA Rnaseq
9.65766	GBM	TCGA Rnaseq
9.77254	GBM	TCGA Rnaseq
9.88632	GBM	TCGA Rnaseq
9.92516	GBM	TCGA Rnaseq
10.0135	GBM	TCGA Rnaseq
10.0275	GBM	TCGA Rnaseq
10.0388	GBM	TCGA Rnaseq
10.0741	GBM	TCGA Rnaseq
10.0921	GBM	TCGA Rnaseq
10.1363	GBM	TCGA Rnaseq
10.1727	GBM	TCGA Rnaseq
10.1937	GBM	TCGA Rnaseq
10.1976	GBM	TCGA Rnaseq
10.2461	GBM	TCGA Rnaseq
10.2511	GBM	TCGA Rnaseq
10.2587	GBM	TCGA Rnaseq
10.2638	GBM	TCGA Rnaseq
10.2667	GBM	TCGA Rnaseq
10.3125	GBM	TCGA Rnaseq
10.3264	GBM	TCGA Rnaseq
10.3319	GBM	TCGA Rnaseq
10.3336	GBM	TCGA Rnaseq
10.3581	GBM	TCGA Rnaseq
10.4056	GBM	TCGA Rnaseq
10.5249	GBM	TCGA Rnaseq
10.5268	GBM	TCGA Rnaseq
10.5502	GBM	TCGA Rnaseq
10.5514	GBM	TCGA Rnaseq
10.553	GBM	TCGA Rnaseq
10.5923	GBM	TCGA Rnaseq
10.6142	GBM	TCGA Rnaseq
10.6448	GBM	TCGA Rnaseq
10.7215	GBM	TCGA Rnaseq
10.729	GBM	TCGA Rnaseq
10.7529	GBM	TCGA Rnaseq
10.7712	GBM	TCGA Rnaseq
10.7917	GBM	TCGA Rnaseq
10.8118	GBM	TCGA Rnaseq
10.8454	GBM	TCGA Rnaseq
10.8802	GBM	TCGA Rnaseq
10.8809	GBM	TCGA Rnaseq
10.8871	GBM	TCGA Rnaseq
10.8961	GBM	TCGA Rnaseq
10.9309	GBM	TCGA Rnaseq
11.0525	GBM	TCGA Rnaseq
11.0932	GBM	TCGA Rnaseq
11.0971	GBM	TCGA Rnaseq
11.2131	GBM	TCGA Rnaseq
11.2317	GBM	TCGA Rnaseq
11.2545	GBM	TCGA Rnaseq
11.2713	GBM	TCGA Rnaseq
11.2744	GBM	TCGA Rnaseq
11.2798	GBM	TCGA Rnaseq
11.2842	GBM	TCGA Rnaseq
11.2887	GBM	TCGA Rnaseq
11.307	GBM	TCGA Rnaseq
11.3648	GBM	TCGA Rnaseq
11.3789	GBM	TCGA Rnaseq
11.4379	GBM	TCGA Rnaseq
11.4668	GBM	TCGA Rnaseq
11.5056	GBM	TCGA Rnaseq
11.5263	GBM	TCGA Rnaseq
11.6162	GBM	TCGA Rnaseq
11.6647	GBM	TCGA Rnaseq
11.7271	GBM	TCGA Rnaseq
11.7837	GBM	TCGA Rnaseq
11.8136	GBM	TCGA Rnaseq
11.8238	GBM	TCGA Rnaseq
11.9098	GBM	TCGA Rnaseq
11.9191	GBM	TCGA Rnaseq
12.0649	GBM	TCGA Rnaseq
12.0824	GBM	TCGA Rnaseq
12.2347	GBM	TCGA Rnaseq
12.2725	GBM	TCGA Rnaseq
12.3438	GBM	TCGA Rnaseq
12.3845	GBM	TCGA Rnaseq
12.4099	GBM	TCGA Rnaseq
12.7397	GBM	TCGA Rnaseq
13.0125	GBM	TCGA Rnaseq
13.0683	GBM	TCGA Rnaseq
13.0753	GBM	TCGA Rnaseq
13.3985	GBM	TCGA Rnaseq
14.5661	GBM	TCGA Rnaseq
14.8944	GBM	TCGA Rnaseq
15.8448	GBM	TCGA Rnaseq
15.9461	GBM	TCGA Rnaseq

## Sheet: BOXPLOT_HES1
expr	Condition	Dataset
8.2	Control	CGGA Rnaseq
6.66	Control	CGGA Rnaseq
13.17	Control	CGGA Rnaseq
8.65	Control	CGGA Rnaseq
4.27	Control	CGGA Rnaseq
25.99	Control	CGGA Rnaseq
8.48	Control	CGGA Rnaseq
14.92	Control	CGGA Rnaseq
5.52	Control	CGGA Rnaseq
4.32	Control	CGGA Rnaseq
22.08	Control	CGGA Rnaseq
10.78	Control	CGGA Rnaseq
11.95	Control	CGGA Rnaseq
6.73	Control	CGGA Rnaseq
36.73	Control	CGGA Rnaseq
7.35	Control	CGGA Rnaseq
2.12	Control	CGGA Rnaseq
13.79	Control	CGGA Rnaseq
11.82	Control	CGGA Rnaseq
8.03	Control	CGGA Rnaseq
14.47	GBM	CGGA Rnaseq
14.69	GBM	CGGA Rnaseq
9.09	GBM	CGGA Rnaseq
23.33	GBM	CGGA Rnaseq
78.72	GBM	CGGA Rnaseq
18.36	GBM	CGGA Rnaseq
27.52	GBM	CGGA Rnaseq
5.44	GBM	CGGA Rnaseq
20.95	GBM	CGGA Rnaseq
26.51	GBM	CGGA Rnaseq
13.07	GBM	CGGA Rnaseq
25.93	GBM	CGGA Rnaseq
53.64	GBM	CGGA Rnaseq
13.94	GBM	CGGA Rnaseq
6.52	GBM	CGGA Rnaseq
35.2	GBM	CGGA Rnaseq
22.37	GBM	CGGA Rnaseq
15.67	GBM	CGGA Rnaseq
13.79	GBM	CGGA Rnaseq
23.68	GBM	CGGA Rnaseq
43.88	GBM	CGGA Rnaseq
22.55	GBM	CGGA Rnaseq
27.02	GBM	CGGA Rnaseq
9.05	GBM	CGGA Rnaseq
22.75	GBM	CGGA Rnaseq
16.79	GBM	CGGA Rnaseq
18.65	GBM	CGGA Rnaseq
37.13	GBM	CGGA Rnaseq
20.8	GBM	CGGA Rnaseq
44.73	GBM	CGGA Rnaseq
9.57	GBM	CGGA Rnaseq
101.18	GBM	CGGA Rnaseq
36.67	GBM	CGGA Rnaseq
16.61	GBM	CGGA Rnaseq
26.98	GBM	CGGA Rnaseq
42.58	GBM	CGGA Rnaseq
13.96	GBM	CGGA Rnaseq
20.53	GBM	CGGA Rnaseq
9.37	GBM	CGGA Rnaseq
10.21	GBM	CGGA Rnaseq
26.36	GBM	CGGA Rnaseq
12.42	GBM	CGGA Rnaseq
11.29	GBM	CGGA Rnaseq
19.32	GBM	CGGA Rnaseq
25.69	GBM	CGGA Rnaseq
10.52	GBM	CGGA Rnaseq
3.87	GBM	CGGA Rnaseq
28.05	GBM	CGGA Rnaseq
13.54	GBM	CGGA Rnaseq
23.78	GBM	CGGA Rnaseq
18.69	GBM	CGGA Rnaseq
2.18	GBM	CGGA Rnaseq
6.78	GBM	CGGA Rnaseq
26.61	GBM	CGGA Rnaseq
26.67	GBM	CGGA Rnaseq
17.99	GBM	CGGA Rnaseq
17.89	GBM	CGGA Rnaseq
8.35	GBM	CGGA Rnaseq
4.53	GBM	CGGA Rnaseq
25.99	GBM	CGGA Rnaseq
8.81	GBM	CGGA Rnaseq
34.65	GBM	CGGA Rnaseq
13.27	GBM	CGGA Rnaseq
22.92	GBM	CGGA Rnaseq
28.36	GBM	CGGA Rnaseq
13.59	GBM	CGGA Rnaseq
10.08	GBM	CGGA Rnaseq
27.06	GBM	CGGA Rnaseq
5.94	GBM	CGGA Rnaseq
11	GBM	CGGA Rnaseq
5.46	GBM	CGGA Rnaseq
20.69	GBM	CGGA Rnaseq
10.34	GBM	CGGA Rnaseq
4.64	GBM	CGGA Rnaseq
12.85	GBM	CGGA Rnaseq
4.61	GBM	CGGA Rnaseq
50.61	GBM	CGGA Rnaseq
33.18	GBM	CGGA Rnaseq
33.68	GBM	CGGA Rnaseq
22.41	GBM	CGGA Rnaseq
23.91	GBM	CGGA Rnaseq
9.71	GBM	CGGA Rnaseq
19.63	GBM	CGGA Rnaseq
8.75	GBM	CGGA Rnaseq
21.28	GBM	CGGA Rnaseq
4.9024	Control	Gravendeel
4.7046	Control	Gravendeel
6.1739	Control	Gravendeel
5.4703	Control	Gravendeel
5.8178	Control	Gravendeel
5.4897	Control	Gravendeel
5.3522	Control	Gravendeel
5.802	Control	Gravendeel
6.7533	GBM	Gravendeel
5.7161	GBM	Gravendeel
6.0635	GBM	Gravendeel
5.8428	GBM	Gravendeel
5.268	GBM	Gravendeel
6.6034	GBM	Gravendeel
6.3567	GBM	Gravendeel
5.6267	GBM	Gravendeel
7.074	GBM	Gravendeel
5.1158	GBM	Gravendeel
6.6724	GBM	Gravendeel
6.2306	GBM	Gravendeel
5.885	GBM	Gravendeel
6.4239	GBM	Gravendeel
6.5916	GBM	Gravendeel
7.3365	GBM	Gravendeel
4.4459	GBM	Gravendeel
6.2423	GBM	Gravendeel
5.4286	GBM	Gravendeel
5.3747	GBM	Gravendeel
6.655	GBM	Gravendeel
6.3117	GBM	Gravendeel
5.3401	GBM	Gravendeel
7.2039	GBM	Gravendeel
6.362	GBM	Gravendeel
6.7979	GBM	Gravendeel
5.4233	GBM	Gravendeel
5.7463	GBM	Gravendeel
5.364	GBM	Gravendeel
4.603	GBM	Gravendeel
4.4418	GBM	Gravendeel
8.2092	GBM	Gravendeel
6.0687	GBM	Gravendeel
5.1557	GBM	Gravendeel
5.8192	GBM	Gravendeel
6.8977	GBM	Gravendeel
6.7563	GBM	Gravendeel
6.5654	GBM	Gravendeel
6.0599	GBM	Gravendeel
7.0303	GBM	Gravendeel
7.3348	GBM	Gravendeel
6.8036	GBM	Gravendeel
5.8264	GBM	Gravendeel
7.9541	GBM	Gravendeel
7.6111	GBM	Gravendeel
5.8023	GBM	Gravendeel
6.1348	GBM	Gravendeel
6.8256	GBM	Gravendeel
6.2432	GBM	Gravendeel
6.5778	GBM	Gravendeel
5.2479	GBM	Gravendeel
5.9158	GBM	Gravendeel
5.3775	GBM	Gravendeel
7.3443	GBM	Gravendeel
6.6719	GBM	Gravendeel
7.4201	GBM	Gravendeel
6.5891	GBM	Gravendeel
7.0966	GBM	Gravendeel
6.5039	GBM	Gravendeel
5.3238	GBM	Gravendeel
6.4169	GBM	Gravendeel
7.7513	GBM	Gravendeel
7.0584	GBM	Gravendeel
6.7775	GBM	Gravendeel
7.2062	GBM	Gravendeel
6.8001	GBM	Gravendeel
6.7842	GBM	Gravendeel
7.3505	GBM	Gravendeel
5.8823	GBM	Gravendeel
5.9399	GBM	Gravendeel
7.6858	GBM	Gravendeel
5.8413	GBM	Gravendeel
6.4866	GBM	Gravendeel
5.5287	GBM	Gravendeel
6.3901	GBM	Gravendeel
6.5155	GBM	Gravendeel
6.7868	GBM	Gravendeel
6.8504	GBM	Gravendeel
6.8476	GBM	Gravendeel
7.3342	GBM	Gravendeel
7.637	GBM	Gravendeel
5.4374	GBM	Gravendeel
7.3848	GBM	Gravendeel
7.0542	GBM	Gravendeel
5.9964	GBM	Gravendeel
7.0701	GBM	Gravendeel
6.8907	GBM	Gravendeel
7.243	GBM	Gravendeel
5.6543	GBM	Gravendeel
6.5752	GBM	Gravendeel
8.6393	GBM	Gravendeel
7.1549	GBM	Gravendeel
5.3207	GBM	Gravendeel
7.1604	GBM	Gravendeel
6.6998	GBM	Gravendeel
6.526	GBM	Gravendeel
6.2985	GBM	Gravendeel
7.0442	GBM	Gravendeel
5.1522	GBM	Gravendeel
5.9833	GBM	Gravendeel
7.0715	GBM	Gravendeel
6.4351	GBM	Gravendeel
6.702	GBM	Gravendeel
6.5651	GBM	Gravendeel
9.0445	GBM	Gravendeel
7.7762	GBM	Gravendeel
6.5533	GBM	Gravendeel
7.8874	GBM	Gravendeel
5.9923	GBM	Gravendeel
9.8123	GBM	Gravendeel
7.664	GBM	Gravendeel
7.9888	GBM	Gravendeel
8.0335	GBM	Gravendeel
7.8383	GBM	Gravendeel
6.5253	GBM	Gravendeel
7.9768	GBM	Gravendeel
7.8946	GBM	Gravendeel
8.465	GBM	Gravendeel
7.769	GBM	Gravendeel
6.8694	GBM	Gravendeel
7.7027	GBM	Gravendeel
7.5179	GBM	Gravendeel
6.8924	GBM	Gravendeel
7.3082	GBM	Gravendeel
9.2165	GBM	Gravendeel
8.4033	GBM	Gravendeel
8.6249	GBM	Gravendeel
7.4876	GBM	Gravendeel
8.439	GBM	Gravendeel
8.1819	GBM	Gravendeel
7.4756	GBM	Gravendeel
7.8532	GBM	Gravendeel
8.4718	GBM	Gravendeel
8.1944	GBM	Gravendeel
7.8985	GBM	Gravendeel
8.713	GBM	Gravendeel
7.9471	GBM	Gravendeel
7.6111	GBM	Gravendeel
6.6354	GBM	Gravendeel
6.4692	GBM	Gravendeel
8.4782	GBM	Gravendeel
7.0865	GBM	Gravendeel
8.4039	GBM	Gravendeel
7.9781	GBM	Gravendeel
8.6274	GBM	Gravendeel
7.7409	GBM	Gravendeel
6.1881	GBM	Gravendeel
7.4537	GBM	Gravendeel
7.2962	GBM	Gravendeel
8.2678	GBM	Gravendeel
8.2984	GBM	Gravendeel
6.3767	GBM	Gravendeel
7.7596	GBM	Gravendeel
6.3782	GBM	Gravendeel
7.459	GBM	Gravendeel
7.7127	GBM	Gravendeel
8.3476	GBM	Gravendeel
6.8712	GBM	Gravendeel
7.6835	GBM	Gravendeel
-1.14415	Control	TCGA Affymetrix
-0.982231	Control	TCGA Affymetrix
-1.608	Control	TCGA Affymetrix
-0.719615	Control	TCGA Affymetrix
-1.26223	Control	TCGA Affymetrix
-1.241	Control	TCGA Affymetrix
-1.02408	Control	TCGA Affymetrix
-1.24492	Control	TCGA Affymetrix
-1.42915	Control	TCGA Affymetrix
-1.80331	Control	TCGA Affymetrix
6.0305	GBM	TCGA Affymetrix
7.4684	GBM	TCGA Affymetrix
7.5092	GBM	TCGA Affymetrix
8.327	GBM	TCGA Affymetrix
8.9618	GBM	TCGA Affymetrix
9.8678	GBM	TCGA Affymetrix
6.8466	GBM	TCGA Affymetrix
4.9569	GBM	TCGA Affymetrix
8.4293	GBM	TCGA Affymetrix
7.8522	GBM	TCGA Affymetrix
7.8202	GBM	TCGA Affymetrix
7.9413	GBM	TCGA Affymetrix
7.8492	GBM	TCGA Affymetrix
5.3915	GBM	TCGA Affymetrix
7.301	GBM	TCGA Affymetrix
8.2546	GBM	TCGA Affymetrix
7.3613	GBM	TCGA Affymetrix
7.6574	GBM	TCGA Affymetrix
8.6626	GBM	TCGA Affymetrix
5.4855	GBM	TCGA Affymetrix
8.2881	GBM	TCGA Affymetrix
8.2534	GBM	TCGA Affymetrix
6.9433	GBM	TCGA Affymetrix
7.6329	GBM	TCGA Affymetrix
8.2161	GBM	TCGA Affymetrix
6.8139	GBM	TCGA Affymetrix
7.6771	GBM	TCGA Affymetrix
7.9464	GBM	TCGA Affymetrix
7.593	GBM	TCGA Affymetrix
8.0315	GBM	TCGA Affymetrix
7.5491	GBM	TCGA Affymetrix
8.8674	GBM	TCGA Affymetrix
8.0562	GBM	TCGA Affymetrix
8.4835	GBM	TCGA Affymetrix
6.7553	GBM	TCGA Affymetrix
8.8845	GBM	TCGA Affymetrix
8.6718	GBM	TCGA Affymetrix
6.5709	GBM	TCGA Affymetrix
7.7909	GBM	TCGA Affymetrix
7.8258	GBM	TCGA Affymetrix
8.3343	GBM	TCGA Affymetrix
7.2157	GBM	TCGA Affymetrix
6.6151	GBM	TCGA Affymetrix
7.8517	GBM	TCGA Affymetrix
7.9938	GBM	TCGA Affymetrix
7.8037	GBM	TCGA Affymetrix
7.6497	GBM	TCGA Affymetrix
8.6666	GBM	TCGA Affymetrix
8.3594	GBM	TCGA Affymetrix
6.6982	GBM	TCGA Affymetrix
7.0456	GBM	TCGA Affymetrix
7.0746	GBM	TCGA Affymetrix
7.6303	GBM	TCGA Affymetrix
8.3869	GBM	TCGA Affymetrix
6.6972	GBM	TCGA Affymetrix
8.1662	GBM	TCGA Affymetrix
8.0142	GBM	TCGA Affymetrix
7.8476	GBM	TCGA Affymetrix
8.5073	GBM	TCGA Affymetrix
8.0769	GBM	TCGA Affymetrix
9.1213	GBM	TCGA Affymetrix
7.6396	GBM	TCGA Affymetrix
7.8289	GBM	TCGA Affymetrix
8.5945	GBM	TCGA Affymetrix
8.4775	GBM	TCGA Affymetrix
8.1045	GBM	TCGA Affymetrix
8.0431	GBM	TCGA Affymetrix
8.0565	GBM	TCGA Affymetrix
8.0928	GBM	TCGA Affymetrix
7.7061	GBM	TCGA Affymetrix
8.0057	GBM	TCGA Affymetrix
7.8079	GBM	TCGA Affymetrix
7.6088	GBM	TCGA Affymetrix
7.9843	GBM	TCGA Affymetrix
7.3021	GBM	TCGA Affymetrix
6.5909	GBM	TCGA Affymetrix
7.3511	GBM	TCGA Affymetrix
8.1929	GBM	TCGA Affymetrix
8.2963	GBM	TCGA Affymetrix
6.2615	GBM	TCGA Affymetrix
8.0786	GBM	TCGA Affymetrix
7.8552	GBM	TCGA Affymetrix
6.8034	GBM	TCGA Affymetrix
8.055	GBM	TCGA Affymetrix
6.7701	GBM	TCGA Affymetrix
7.1892	GBM	TCGA Affymetrix
7.4675	GBM	TCGA Affymetrix
6.8457	GBM	TCGA Affymetrix
9.4526	GBM	TCGA Affymetrix
7.9333	GBM	TCGA Affymetrix
8.0347	GBM	TCGA Affymetrix
7.6564	GBM	TCGA Affymetrix
8.2525	GBM	TCGA Affymetrix
8.3802	GBM	TCGA Affymetrix
7.8513	GBM	TCGA Affymetrix
7.0041	GBM	TCGA Affymetrix
6.8259	GBM	TCGA Affymetrix
7.3886	GBM	TCGA Affymetrix
6.8875	GBM	TCGA Affymetrix
8.0015	GBM	TCGA Affymetrix
7.7739	GBM	TCGA Affymetrix
8.296	GBM	TCGA Affymetrix
5.9974	GBM	TCGA Affymetrix
8.9337	GBM	TCGA Affymetrix
6.9876	GBM	TCGA Affymetrix
6.4915	GBM	TCGA Affymetrix
7.8386	GBM	TCGA Affymetrix
8.0544	GBM	TCGA Affymetrix
6.4853	GBM	TCGA Affymetrix
6.7385	GBM	TCGA Affymetrix
8.31	GBM	TCGA Affymetrix
8.2265	GBM	TCGA Affymetrix
8.1651	GBM	TCGA Affymetrix
7.8758	GBM	TCGA Affymetrix
7.5815	GBM	TCGA Affymetrix
7.5115	GBM	TCGA Affymetrix
8.6964	GBM	TCGA Affymetrix
8.3488	GBM	TCGA Affymetrix
6.2516	GBM	TCGA Affymetrix
7.63	GBM	TCGA Affymetrix
7.4188	GBM	TCGA Affymetrix
7.5707	GBM	TCGA Affymetrix
7.0517	GBM	TCGA Affymetrix
7.7908	GBM	TCGA Affymetrix
7.2646	GBM	TCGA Affymetrix
7.9957	GBM	TCGA Affymetrix
8.0215	GBM	TCGA Affymetrix
8.2851	GBM	TCGA Affymetrix
7.8585	GBM	TCGA Affymetrix
7.7473	GBM	TCGA Affymetrix
6.0279	GBM	TCGA Affymetrix
6.7863	GBM	TCGA Affymetrix
7.1832	GBM	TCGA Affymetrix
8.5645	GBM	TCGA Affymetrix
7.458	GBM	TCGA Affymetrix
8.4251	GBM	TCGA Affymetrix
9.1069	GBM	TCGA Affymetrix
7.5465	GBM	TCGA Affymetrix
7.9733	GBM	TCGA Affymetrix
7.9386	GBM	TCGA Affymetrix
8.0378	GBM	TCGA Affymetrix
7.7901	GBM	TCGA Affymetrix
9.2696	GBM	TCGA Affymetrix
7.2932	GBM	TCGA Affymetrix
7.0789	GBM	TCGA Affymetrix
6.7407	GBM	TCGA Affymetrix
8.0927	GBM	TCGA Affymetrix
8.1636	GBM	TCGA Affymetrix
7.5601	GBM	TCGA Affymetrix
7.7789	GBM	TCGA Affymetrix
8.4009	GBM	TCGA Affymetrix
7.8906	GBM	TCGA Affymetrix
7.4385	GBM	TCGA Affymetrix
6.3955	GBM	TCGA Affymetrix
8.3394	GBM	TCGA Affymetrix
6.6201	GBM	TCGA Affymetrix
7.097	GBM	TCGA Affymetrix
7.7873	GBM	TCGA Affymetrix
7.4862	GBM	TCGA Affymetrix
6.5035	GBM	TCGA Affymetrix
7.9991	GBM	TCGA Affymetrix
7.8634	GBM	TCGA Affymetrix
7.5187	GBM	TCGA Affymetrix
8.4545	GBM	TCGA Affymetrix
7.9846	GBM	TCGA Affymetrix
6.961	GBM	TCGA Affymetrix
6.3665	GBM	TCGA Affymetrix
7.8606	GBM	TCGA Affymetrix
8.3842	GBM	TCGA Affymetrix
7.2471	GBM	TCGA Affymetrix
6.5364	GBM	TCGA Affymetrix
8.2258	GBM	TCGA Affymetrix
7.2781	GBM	TCGA Affymetrix
8.0752	GBM	TCGA Affymetrix
8.0674	GBM	TCGA Affymetrix
7.3711	GBM	TCGA Affymetrix
7.7392	GBM	TCGA Affymetrix
7.8631	GBM	TCGA Affymetrix
7.6887	GBM	TCGA Affymetrix
7.3174	GBM	TCGA Affymetrix
8.2922	GBM	TCGA Affymetrix
7.2092	GBM	TCGA Affymetrix
8.2542	GBM	TCGA Affymetrix
8.6918	GBM	TCGA Affymetrix
6.7509	GBM	TCGA Affymetrix
8.5293	GBM	TCGA Affymetrix
7.6774	GBM	TCGA Affymetrix
7.3459	GBM	TCGA Affymetrix
9.4805	GBM	TCGA Affymetrix
6.0724	GBM	TCGA Affymetrix
6.7243	GBM	TCGA Affymetrix
7.3511	GBM	TCGA Affymetrix
8.3353	GBM	TCGA Affymetrix
8.6183	GBM	TCGA Affymetrix
7.3776	GBM	TCGA Affymetrix
8.62	GBM	TCGA Affymetrix
8.0262	GBM	TCGA Affymetrix
9.0051	GBM	TCGA Affymetrix
7.7452	GBM	TCGA Affymetrix
7.3636	GBM	TCGA Affymetrix
8.1971	GBM	TCGA Affymetrix
8.1566	GBM	TCGA Affymetrix
8.4556	GBM	TCGA Affymetrix
7.2479	GBM	TCGA Affymetrix
9.0238	GBM	TCGA Affymetrix
9.2542	GBM	TCGA Affymetrix
6.9656	GBM	TCGA Affymetrix
8.1881	GBM	TCGA Affymetrix
7.4232	GBM	TCGA Affymetrix
7.7959	GBM	TCGA Affymetrix
7.3458	GBM	TCGA Affymetrix
8.2652	GBM	TCGA Affymetrix
8.0917	GBM	TCGA Affymetrix
7.8607	GBM	TCGA Affymetrix
7.0877	GBM	TCGA Affymetrix
6.8461	GBM	TCGA Affymetrix
7.9225	GBM	TCGA Affymetrix
7.9326	GBM	TCGA Affymetrix
8.2675	GBM	TCGA Affymetrix
8.3907	GBM	TCGA Affymetrix
7.2493	GBM	TCGA Affymetrix
8.0179	GBM	TCGA Affymetrix
7.4215	GBM	TCGA Affymetrix
7.7353	GBM	TCGA Affymetrix
7.825	GBM	TCGA Affymetrix
8.7153	GBM	TCGA Affymetrix
6.4079	GBM	TCGA Affymetrix
7.8211	GBM	TCGA Affymetrix
7.3861	GBM	TCGA Affymetrix
7.4286	GBM	TCGA Affymetrix
7.5981	GBM	TCGA Affymetrix
8.324	GBM	TCGA Affymetrix
7.3121	GBM	TCGA Affymetrix
6.7186	GBM	TCGA Affymetrix
7.8881	GBM	TCGA Affymetrix
8.3018	GBM	TCGA Affymetrix
8.3198	GBM	TCGA Affymetrix
8.0792	GBM	TCGA Affymetrix
8.5515	GBM	TCGA Affymetrix
8.2571	GBM	TCGA Affymetrix
8.7187	GBM	TCGA Affymetrix
7.7227	GBM	TCGA Affymetrix
7.6194	GBM	TCGA Affymetrix
8.0328	GBM	TCGA Affymetrix
7.8821	GBM	TCGA Affymetrix
8.0944	GBM	TCGA Affymetrix
6.9569	GBM	TCGA Affymetrix
8.415	GBM	TCGA Affymetrix
8.3037	GBM	TCGA Affymetrix
6.3017	GBM	TCGA Affymetrix
6.383	GBM	TCGA Affymetrix
7.2903	GBM	TCGA Affymetrix
8.0106	GBM	TCGA Affymetrix
8.3502	GBM	TCGA Affymetrix
7.8301	GBM	TCGA Affymetrix
8.3195	GBM	TCGA Affymetrix
8.1482	GBM	TCGA Affymetrix
7.7926	GBM	TCGA Affymetrix
8.4677	GBM	TCGA Affymetrix
7.5319	GBM	TCGA Affymetrix
6.9296	GBM	TCGA Affymetrix
6.9636	GBM	TCGA Affymetrix
5.8358	GBM	TCGA Affymetrix
8.2191	GBM	TCGA Affymetrix
8.1415	GBM	TCGA Affymetrix
8.0108	GBM	TCGA Affymetrix
7.5477	GBM	TCGA Affymetrix
6.639	GBM	TCGA Affymetrix
7.8258	GBM	TCGA Affymetrix
8.2781	GBM	TCGA Affymetrix
6.8594	GBM	TCGA Affymetrix
7.8783	GBM	TCGA Affymetrix
8.0984	GBM	TCGA Affymetrix
8.2259	GBM	TCGA Affymetrix
7.4494	GBM	TCGA Affymetrix
7.9216	GBM	TCGA Affymetrix
6.4385	GBM	TCGA Affymetrix
8.4145	GBM	TCGA Affymetrix
8.2605	GBM	TCGA Affymetrix
7.6141	GBM	TCGA Affymetrix
7.3095	GBM	TCGA Affymetrix
7.1729	GBM	TCGA Affymetrix
7.6844	GBM	TCGA Affymetrix
7.7715	GBM	TCGA Affymetrix
8.5968	GBM	TCGA Affymetrix
8.0894	GBM	TCGA Affymetrix
8.3278	GBM	TCGA Affymetrix
8.2788	GBM	TCGA Affymetrix
7.5439	GBM	TCGA Affymetrix
7.9259	GBM	TCGA Affymetrix
6.635	GBM	TCGA Affymetrix
7.5862	GBM	TCGA Affymetrix
7.711	GBM	TCGA Affymetrix
8.1271	GBM	TCGA Affymetrix
8.6765	GBM	TCGA Affymetrix
7.4336	GBM	TCGA Affymetrix
8.4335	GBM	TCGA Affymetrix
7.3864	GBM	TCGA Affymetrix
8.0306	GBM	TCGA Affymetrix
7.8242	GBM	TCGA Affymetrix
6.9773	GBM	TCGA Affymetrix
7.7303	GBM	TCGA Affymetrix
8.1048	GBM	TCGA Affymetrix
7.8791	GBM	TCGA Affymetrix
7.8972	GBM	TCGA Affymetrix
7.2551	GBM	TCGA Affymetrix
7.2771	GBM	TCGA Affymetrix
7.8092	GBM	TCGA Affymetrix
8.5936	GBM	TCGA Affymetrix
7.7199	GBM	TCGA Affymetrix
7.1397	GBM	TCGA Affymetrix
7.2803	GBM	TCGA Affymetrix
8.6832	GBM	TCGA Affymetrix
7.288	GBM	TCGA Affymetrix
8.2863	GBM	TCGA Affymetrix
6.9522	GBM	TCGA Affymetrix
8.2995	GBM	TCGA Affymetrix
8.1641	GBM	TCGA Affymetrix
7.1554	GBM	TCGA Affymetrix
8.2747	GBM	TCGA Affymetrix
7.9436	GBM	TCGA Affymetrix
8.323	GBM	TCGA Affymetrix
7.9774	GBM	TCGA Affymetrix
7.8882	GBM	TCGA Affymetrix
8.2222	GBM	TCGA Affymetrix
7.6693	GBM	TCGA Affymetrix
7.86	GBM	TCGA Affymetrix
8.8915	GBM	TCGA Affymetrix
7.3049	GBM	TCGA Affymetrix
8.3245	GBM	TCGA Affymetrix
8.1446	GBM	TCGA Affymetrix
6.7868	GBM	TCGA Affymetrix
7.5753	GBM	TCGA Affymetrix
7.2987	GBM	TCGA Affymetrix
8.4917	GBM	TCGA Affymetrix
8.0556	GBM	TCGA Affymetrix
7.8135	GBM	TCGA Affymetrix
6.9693	GBM	TCGA Affymetrix
7.907	GBM	TCGA Affymetrix
7.8096	GBM	TCGA Affymetrix
8.1503	GBM	TCGA Affymetrix
8.6461	GBM	TCGA Affymetrix
8.365	GBM	TCGA Affymetrix
6.9584	GBM	TCGA Affymetrix
8.1935	GBM	TCGA Affymetrix
6.988	GBM	TCGA Affymetrix
5.8366	GBM	TCGA Affymetrix
7.6185	GBM	TCGA Affymetrix
7.7475	GBM	TCGA Affymetrix
7.0965	GBM	TCGA Affymetrix
5.6014	GBM	TCGA Affymetrix
7.6837	GBM	TCGA Affymetrix
6.6465	GBM	TCGA Affymetrix
7.8695	GBM	TCGA Affymetrix
7.2901	GBM	TCGA Affymetrix
8.5153	GBM	TCGA Affymetrix
8.1904	GBM	TCGA Affymetrix
6.8034	GBM	TCGA Affymetrix
6.898	GBM	TCGA Affymetrix
5.0653	GBM	TCGA Affymetrix
8.1056	GBM	TCGA Affymetrix
8.385	GBM	TCGA Affymetrix
7.9424	GBM	TCGA Affymetrix
6.8616	GBM	TCGA Affymetrix
6.9346	GBM	TCGA Affymetrix
6.9402	GBM	TCGA Affymetrix
7.7753	GBM	TCGA Affymetrix
6.3384	GBM	TCGA Affymetrix
6.0921	GBM	TCGA Affymetrix
7.9275	GBM	TCGA Affymetrix
7.9411	GBM	TCGA Affymetrix
8.175	GBM	TCGA Affymetrix
7.6109	GBM	TCGA Affymetrix
7.3077	GBM	TCGA Affymetrix
8.8686	GBM	TCGA Affymetrix
7.6837	GBM	TCGA Affymetrix
8.3372	GBM	TCGA Affymetrix
7.8094	GBM	TCGA Affymetrix
6.6682	GBM	TCGA Affymetrix
7.9642	GBM	TCGA Affymetrix
6.4969	GBM	TCGA Affymetrix
7.6758	GBM	TCGA Affymetrix
8.4878	GBM	TCGA Affymetrix
7.2828	GBM	TCGA Affymetrix
7.876	GBM	TCGA Affymetrix
8.2584	GBM	TCGA Affymetrix
8.5945	GBM	TCGA Affymetrix
7.2074	GBM	TCGA Affymetrix
7.4558	GBM	TCGA Affymetrix
7.8697	GBM	TCGA Affymetrix
7.2412	GBM	TCGA Affymetrix
7.678	GBM	TCGA Affymetrix
8.9423	GBM	TCGA Affymetrix
8.2312	GBM	TCGA Affymetrix
6.3715	GBM	TCGA Affymetrix
7.5696	GBM	TCGA Affymetrix
8.2629	GBM	TCGA Affymetrix
8.2818	GBM	TCGA Affymetrix
8.8996	GBM	TCGA Affymetrix
7.8339	GBM	TCGA Affymetrix
8.5285	GBM	TCGA Affymetrix
8.0908	GBM	TCGA Affymetrix
7.988	GBM	TCGA Affymetrix
8.7209	GBM	TCGA Affymetrix
7.0853	GBM	TCGA Affymetrix
8.4917	GBM	TCGA Affymetrix
8.0343	GBM	TCGA Affymetrix
7.5515	GBM	TCGA Affymetrix
8.4267	GBM	TCGA Affymetrix
9.0878	GBM	TCGA Affymetrix
8.2866	GBM	TCGA Affymetrix
8.0255	GBM	TCGA Affymetrix
7.8113	GBM	TCGA Affymetrix
8.0847	GBM	TCGA Affymetrix
8.8566	GBM	TCGA Affymetrix
8.2449	GBM	TCGA Affymetrix
9.0312	GBM	TCGA Affymetrix
7.6923	GBM	TCGA Affymetrix
8.2113	GBM	TCGA Affymetrix
8.0782	GBM	TCGA Affymetrix
7.1081	GBM	TCGA Affymetrix
8.2503	GBM	TCGA Affymetrix
8.1341	GBM	TCGA Affymetrix
7.976	GBM	TCGA Affymetrix
7.1704	GBM	TCGA Affymetrix
8.0108	GBM	TCGA Affymetrix
7.5051	GBM	TCGA Affymetrix
4.9497	GBM	TCGA Affymetrix
8.1295	GBM	TCGA Affymetrix
7.1566	GBM	TCGA Affymetrix
7.6476	GBM	TCGA Affymetrix
8.0666	GBM	TCGA Affymetrix
7.8555	GBM	TCGA Affymetrix
7.228	GBM	TCGA Affymetrix
8.164	GBM	TCGA Affymetrix
7.4231	GBM	TCGA Affymetrix
8.0088	GBM	TCGA Affymetrix
8.5065	GBM	TCGA Affymetrix
8.2905	GBM	TCGA Affymetrix
7.6061	GBM	TCGA Affymetrix
7.0446	GBM	TCGA Affymetrix
8.4895	GBM	TCGA Affymetrix
7.8417	GBM	TCGA Affymetrix
7.7559	GBM	TCGA Affymetrix
7.0786	GBM	TCGA Affymetrix
8.2982	GBM	TCGA Affymetrix
7.9909	GBM	TCGA Affymetrix
6.9195	GBM	TCGA Affymetrix
8.542	GBM	TCGA Affymetrix
8.0386	GBM	TCGA Affymetrix
7.833	GBM	TCGA Affymetrix
7.7981	GBM	TCGA Affymetrix
7.6683	GBM	TCGA Affymetrix
7.5131	GBM	TCGA Affymetrix
8.6268	GBM	TCGA Affymetrix
7.4972	GBM	TCGA Affymetrix
7.7961	GBM	TCGA Affymetrix
8.1277	GBM	TCGA Affymetrix
6.9944	GBM	TCGA Affymetrix
7.7679	GBM	TCGA Affymetrix
7.3477	GBM	TCGA Affymetrix
7.6817	GBM	TCGA Affymetrix
6.8414	GBM	TCGA Affymetrix
7.9196	GBM	TCGA Affymetrix
8.0755	GBM	TCGA Affymetrix
7.7854	GBM	TCGA Affymetrix
7.3347	GBM	TCGA Affymetrix
6.7198	GBM	TCGA Affymetrix
9.056	GBM	TCGA Affymetrix
8.6062	GBM	TCGA Affymetrix
7.4711	GBM	TCGA Affymetrix
8.1643	GBM	TCGA Affymetrix
8.0963	GBM	TCGA Affymetrix
8.4226	GBM	TCGA Affymetrix
8.0321	GBM	TCGA Affymetrix
7.7914	GBM	TCGA Affymetrix
7.4052	GBM	TCGA Affymetrix
7.8383	GBM	TCGA Affymetrix
8.0018	GBM	TCGA Affymetrix
7.0132	GBM	TCGA Affymetrix
8.2965	GBM	TCGA Affymetrix
8.7908	GBM	TCGA Affymetrix
7.96	GBM	TCGA Affymetrix
6.9227	GBM	TCGA Affymetrix
7.6655	GBM	TCGA Affymetrix
7.8347	GBM	TCGA Affymetrix
7.8374	GBM	TCGA Affymetrix
8.7311	GBM	TCGA Affymetrix
7.7955	GBM	TCGA Affymetrix
8.2038	GBM	TCGA Affymetrix
8.0156	GBM	TCGA Affymetrix
8.0031	GBM	TCGA Affymetrix
7.5732	GBM	TCGA Affymetrix
8.5225	GBM	TCGA Affymetrix
7.6297	GBM	TCGA Affymetrix
7.4015	GBM	TCGA Affymetrix
6.9983	GBM	TCGA Affymetrix
6.9313	GBM	TCGA Affymetrix
6.9189	GBM	TCGA Affymetrix
8.5221	GBM	TCGA Affymetrix
7.9382	GBM	TCGA Affymetrix
8.0801	GBM	TCGA Affymetrix
7.1791	GBM	TCGA Affymetrix
7.3593	GBM	TCGA Affymetrix
8.2213	GBM	TCGA Affymetrix
7.2347	GBM	TCGA Affymetrix
8.7854	GBM	TCGA Affymetrix
8.6954	GBM	TCGA Affymetrix
6.972	GBM	TCGA Affymetrix
8.1979	GBM	TCGA Affymetrix
7.3833	GBM	TCGA Affymetrix
6.9236	GBM	TCGA Affymetrix
6.7656	GBM	TCGA Affymetrix
8.2767	GBM	TCGA Affymetrix
6.9692	GBM	TCGA Affymetrix
8.3538	GBM	TCGA Affymetrix
7.7972	GBM	TCGA Affymetrix
7.99	GBM	TCGA Affymetrix
7.1809	GBM	TCGA Affymetrix
7.8676	GBM	TCGA Affymetrix
7.5835	GBM	TCGA Affymetrix
7.3693	GBM	TCGA Affymetrix
8.4883	GBM	TCGA Affymetrix
7.4414	GBM	TCGA Affymetrix
7.5362	GBM	TCGA Affymetrix
7.9945	GBM	TCGA Affymetrix
7.5748	GBM	TCGA Affymetrix
7.3482	GBM	TCGA Affymetrix
-1.14415	Control	TCGA Agilent
-0.982231	Control	TCGA Agilent
-1.608	Control	TCGA Agilent
-0.719615	Control	TCGA Agilent
-1.26223	Control	TCGA Agilent
-1.241	Control	TCGA Agilent
-1.02408	Control	TCGA Agilent
-1.24492	Control	TCGA Agilent
-1.42915	Control	TCGA Agilent
-1.80331	Control	TCGA Agilent
-0.0725385	GBM	TCGA Agilent
-0.0134615	GBM	TCGA Agilent
-0.574	GBM	TCGA Agilent
0.644923	GBM	TCGA Agilent
0.998231	GBM	TCGA Agilent
-2.30285	GBM	TCGA Agilent
-0.206923	GBM	TCGA Agilent
-2.903	GBM	TCGA Agilent
0.335923	GBM	TCGA Agilent
-0.407692	GBM	TCGA Agilent
-0.419769	GBM	TCGA Agilent
-0.0940769	GBM	TCGA Agilent
-0.410308	GBM	TCGA Agilent
-2.13492	GBM	TCGA Agilent
-1.20592	GBM	TCGA Agilent
-0.342385	GBM	TCGA Agilent
-0.249154	GBM	TCGA Agilent
-1.047	GBM	TCGA Agilent
0.219615	GBM	TCGA Agilent
0.180154	GBM	TCGA Agilent
-0.0314615	GBM	TCGA Agilent
0.556154	GBM	TCGA Agilent
0.191615	GBM	TCGA Agilent
-0.795231	GBM	TCGA Agilent
-0.0830769	GBM	TCGA Agilent
-0.985923	GBM	TCGA Agilent
-0.399462	GBM	TCGA Agilent
0.293154	GBM	TCGA Agilent
0.632385	GBM	TCGA Agilent
-0.206077	GBM	TCGA Agilent
-0.764923	GBM	TCGA Agilent
-0.0713077	GBM	TCGA Agilent
0.164231	GBM	TCGA Agilent
0.240308	GBM	TCGA Agilent
-1.47338	GBM	TCGA Agilent
0.829769	GBM	TCGA Agilent
0.618769	GBM	TCGA Agilent
-1.58377	GBM	TCGA Agilent
-0.308615	GBM	TCGA Agilent
-0.104231	GBM	TCGA Agilent
0.515	GBM	TCGA Agilent
-0.532462	GBM	TCGA Agilent
-1.64938	GBM	TCGA Agilent
-0.163308	GBM	TCGA Agilent
0.166846	GBM	TCGA Agilent
-0.735923	GBM	TCGA Agilent
-0.193077	GBM	TCGA Agilent
0.671538	GBM	TCGA Agilent
0.378692	GBM	TCGA Agilent
-1.38123	GBM	TCGA Agilent
-1.07231	GBM	TCGA Agilent
-0.425692	GBM	TCGA Agilent
-0.0676923	GBM	TCGA Agilent
0.623	GBM	TCGA Agilent
-1.42662	GBM	TCGA Agilent
0.190923	GBM	TCGA Agilent
0.417923	GBM	TCGA Agilent
-0.0896154	GBM	TCGA Agilent
0.488846	GBM	TCGA Agilent
0.188923	GBM	TCGA Agilent
0.868154	GBM	TCGA Agilent
-0.389462	GBM	TCGA Agilent
-0.716077	GBM	TCGA Agilent
0.608923	GBM	TCGA Agilent
0.661692	GBM	TCGA Agilent
0.314769	GBM	TCGA Agilent
-0.207846	GBM	TCGA Agilent
0.133385	GBM	TCGA Agilent
0.311538	GBM	TCGA Agilent
-0.61	GBM	TCGA Agilent
-0.512385	GBM	TCGA Agilent
-0.0243077	GBM	TCGA Agilent
-0.0482308	GBM	TCGA Agilent
-0.039	GBM	TCGA Agilent
-0.756769	GBM	TCGA Agilent
-1.61508	GBM	TCGA Agilent
-1.14685	GBM	TCGA Agilent
0.112154	GBM	TCGA Agilent
0.266231	GBM	TCGA Agilent
-1.45954	GBM	TCGA Agilent
0.193769	GBM	TCGA Agilent
-0.304077	GBM	TCGA Agilent
-1.35738	GBM	TCGA Agilent
0.138923	GBM	TCGA Agilent
-1.271	GBM	TCGA Agilent
-1.14362	GBM	TCGA Agilent
-0.503538	GBM	TCGA Agilent
-1.38131	GBM	TCGA Agilent
1.83931	GBM	TCGA Agilent
0.0653077	GBM	TCGA Agilent
0.0723846	GBM	TCGA Agilent
-0.200077	GBM	TCGA Agilent
-0.156769	GBM	TCGA Agilent
0.0246154	GBM	TCGA Agilent
-0.235308	GBM	TCGA Agilent
-1.14638	GBM	TCGA Agilent
-1.52846	GBM	TCGA Agilent
-0.857077	GBM	TCGA Agilent
-1.07585	GBM	TCGA Agilent
0.181615	GBM	TCGA Agilent
-0.338	GBM	TCGA Agilent
0.408538	GBM	TCGA Agilent
-1.70638	GBM	TCGA Agilent
1.10054	GBM	TCGA Agilent
-1.02715	GBM	TCGA Agilent
-1.54938	GBM	TCGA Agilent
-0.0403077	GBM	TCGA Agilent
0.226923	GBM	TCGA Agilent
-1.36654	GBM	TCGA Agilent
-0.896462	GBM	TCGA Agilent
0.499308	GBM	TCGA Agilent
0.488308	GBM	TCGA Agilent
0.0327692	GBM	TCGA Agilent
-0.343308	GBM	TCGA Agilent
-0.507462	GBM	TCGA Agilent
-0.446846	GBM	TCGA Agilent
0.772	GBM	TCGA Agilent
0.471077	GBM	TCGA Agilent
-1.40077	GBM	TCGA Agilent
-0.0386154	GBM	TCGA Agilent
-0.635231	GBM	TCGA Agilent
-0.622538	GBM	TCGA Agilent
-0.987154	GBM	TCGA Agilent
0.255769	GBM	TCGA Agilent
0.0669231	GBM	TCGA Agilent
0.0188462	GBM	TCGA Agilent
0.0599231	GBM	TCGA Agilent
0.240692	GBM	TCGA Agilent
-0.0753077	GBM	TCGA Agilent
-0.235385	GBM	TCGA Agilent
-2.13677	GBM	TCGA Agilent
-1.07292	GBM	TCGA Agilent
-0.736692	GBM	TCGA Agilent
0.567692	GBM	TCGA Agilent
-0.187692	GBM	TCGA Agilent
0.743231	GBM	TCGA Agilent
1.28108	GBM	TCGA Agilent
-0.588462	GBM	TCGA Agilent
-0.146308	GBM	TCGA Agilent
0.140846	GBM	TCGA Agilent
0.297615	GBM	TCGA Agilent
-0.304846	GBM	TCGA Agilent
1.45362	GBM	TCGA Agilent
-0.685	GBM	TCGA Agilent
-0.37	GBM	TCGA Agilent
-0.713615	GBM	TCGA Agilent
0.143385	GBM	TCGA Agilent
-0.501769	GBM	TCGA Agilent
-0.371308	GBM	TCGA Agilent
-0.0387692	GBM	TCGA Agilent
0.281538	GBM	TCGA Agilent
-1.41008	GBM	TCGA Agilent
-0.393385	GBM	TCGA Agilent
-1.29115	GBM	TCGA Agilent
0.629769	GBM	TCGA Agilent
-1.38215	GBM	TCGA Agilent
-0.918308	GBM	TCGA Agilent
-0.702692	GBM	TCGA Agilent
-0.515231	GBM	TCGA Agilent
-1.77208	GBM	TCGA Agilent
-0.118385	GBM	TCGA Agilent
0.00246154	GBM	TCGA Agilent
-0.555462	GBM	TCGA Agilent
0.496769	GBM	TCGA Agilent
-0.384846	GBM	TCGA Agilent
-1.14054	GBM	TCGA Agilent
-1.54838	GBM	TCGA Agilent
-0.226692	GBM	TCGA Agilent
0.0932308	GBM	TCGA Agilent
-1.01623	GBM	TCGA Agilent
-1.07046	GBM	TCGA Agilent
-0.406846	GBM	TCGA Agilent
0.461077	GBM	TCGA Agilent
0.498769	GBM	TCGA Agilent
-0.140923	GBM	TCGA Agilent
0.380154	GBM	TCGA Agilent
0.276308	GBM	TCGA Agilent
-0.0877692	GBM	TCGA Agilent
-1.01508	GBM	TCGA Agilent
-0.0570769	GBM	TCGA Agilent
-1.29538	GBM	TCGA Agilent
-0.126846	GBM	TCGA Agilent
0.821308	GBM	TCGA Agilent
-1.349	GBM	TCGA Agilent
0.270692	GBM	TCGA Agilent
-0.429923	GBM	TCGA Agilent
-0.827154	GBM	TCGA Agilent
1.37446	GBM	TCGA Agilent
-2.27615	GBM	TCGA Agilent
-1.32323	GBM	TCGA Agilent
-0.626769	GBM	TCGA Agilent
0.429077	GBM	TCGA Agilent
-0.727538	GBM	TCGA Agilent
0.693846	GBM	TCGA Agilent
-0.219231	GBM	TCGA Agilent
0.704769	GBM	TCGA Agilent
-0.464462	GBM	TCGA Agilent
-0.979077	GBM	TCGA Agilent
0.0508462	GBM	TCGA Agilent
0.104077	GBM	TCGA Agilent
0.355308	GBM	TCGA Agilent
-0.903769	GBM	TCGA Agilent
1.02531	GBM	TCGA Agilent
1.29208	GBM	TCGA Agilent
-1.62277	GBM	TCGA Agilent
0.0857692	GBM	TCGA Agilent
-0.317154	GBM	TCGA Agilent
-1.22623	GBM	TCGA Agilent
-1.35223	GBM	TCGA Agilent
0.220538	GBM	TCGA Agilent
-0.329769	GBM	TCGA Agilent
-0.183769	GBM	TCGA Agilent
0.623385	GBM	TCGA Agilent
-1.592	GBM	TCGA Agilent
-0.252769	GBM	TCGA Agilent
-0.854615	GBM	TCGA Agilent
-0.635846	GBM	TCGA Agilent
-0.894692	GBM	TCGA Agilent
0.0685385	GBM	TCGA Agilent
-0.663692	GBM	TCGA Agilent
-0.972308	GBM	TCGA Agilent
-0.348538	GBM	TCGA Agilent
0.290077	GBM	TCGA Agilent
0.282231	GBM	TCGA Agilent
-0.191615	GBM	TCGA Agilent
0.338769	GBM	TCGA Agilent
-0.0213077	GBM	TCGA Agilent
0.627	GBM	TCGA Agilent
-0.173538	GBM	TCGA Agilent
-0.609462	GBM	TCGA Agilent
-0.629231	GBM	TCGA Agilent
-0.376	GBM	TCGA Agilent
0.00692308	GBM	TCGA Agilent
-1.07369	GBM	TCGA Agilent
0.240077	GBM	TCGA Agilent
0.0295385	GBM	TCGA Agilent
-1.51731	GBM	TCGA Agilent
-1.50708	GBM	TCGA Agilent
-0.72	GBM	TCGA Agilent
0.128	GBM	TCGA Agilent
0.317231	GBM	TCGA Agilent
-0.366923	GBM	TCGA Agilent
0.305846	GBM	TCGA Agilent
-0.134769	GBM	TCGA Agilent
-0.365923	GBM	TCGA Agilent
0.506385	GBM	TCGA Agilent
-0.477154	GBM	TCGA Agilent
-1.18931	GBM	TCGA Agilent
-0.967077	GBM	TCGA Agilent
-1.73146	GBM	TCGA Agilent
0.220308	GBM	TCGA Agilent
0.0722308	GBM	TCGA Agilent
0.229154	GBM	TCGA Agilent
-0.786615	GBM	TCGA Agilent
-1.03377	GBM	TCGA Agilent
-0.421769	GBM	TCGA Agilent
-0.0844615	GBM	TCGA Agilent
-0.844385	GBM	TCGA Agilent
0.546923	GBM	TCGA Agilent
0.463769	GBM	TCGA Agilent
0.278462	GBM	TCGA Agilent
-0.0783077	GBM	TCGA Agilent
0.200385	GBM	TCGA Agilent
-0.936077	GBM	TCGA Agilent
0.679923	GBM	TCGA Agilent
0.476077	GBM	TCGA Agilent
0.245231	GBM	TCGA Agilent
-0.160769	GBM	TCGA Agilent
-0.519231	GBM	TCGA Agilent
0.0148462	GBM	TCGA Agilent
0.366077	GBM	TCGA Agilent
0.366077	GBM	TCGA Agilent
-0.328462	GBM	TCGA Agilent
0.0106154	GBM	TCGA Agilent
0.0336923	GBM	TCGA Agilent
-0.780846	GBM	TCGA Agilent
-0.0903077	GBM	TCGA Agilent
-1.60962	GBM	TCGA Agilent
-0.576077	GBM	TCGA Agilent
-0.544308	GBM	TCGA Agilent
-0.0576154	GBM	TCGA Agilent
0.606846	GBM	TCGA Agilent
-0.707308	GBM	TCGA Agilent
0.391231	GBM	TCGA Agilent
-0.588769	GBM	TCGA Agilent
-0.336615	GBM	TCGA Agilent
-0.0955385	GBM	TCGA Agilent
-0.930385	GBM	TCGA Agilent
-0.466538	GBM	TCGA Agilent
0.300692	GBM	TCGA Agilent
-0.482154	GBM	TCGA Agilent
-0.228923	GBM	TCGA Agilent
-0.353	GBM	TCGA Agilent
-0.892462	GBM	TCGA Agilent
0.122769	GBM	TCGA Agilent
0.906154	GBM	TCGA Agilent
-0.250692	GBM	TCGA Agilent
-0.968	GBM	TCGA Agilent
-0.519385	GBM	TCGA Agilent
0.783923	GBM	TCGA Agilent
-0.579769	GBM	TCGA Agilent
0.507692	GBM	TCGA Agilent
-1.11877	GBM	TCGA Agilent
0.485385	GBM	TCGA Agilent
0.214231	GBM	TCGA Agilent
-0.825077	GBM	TCGA Agilent
0.535385	GBM	TCGA Agilent
-0.186462	GBM	TCGA Agilent
0.603231	GBM	TCGA Agilent
-0.214923	GBM	TCGA Agilent
0.175846	GBM	TCGA Agilent
-0.528231	GBM	TCGA Agilent
-0.316308	GBM	TCGA Agilent
0.959923	GBM	TCGA Agilent
-0.297231	GBM	TCGA Agilent
-0.322385	GBM	TCGA Agilent
-0.116692	GBM	TCGA Agilent
-1.26246	GBM	TCGA Agilent
-0.137615	GBM	TCGA Agilent
-1.01254	GBM	TCGA Agilent
-0.0155385	GBM	TCGA Agilent
0.0212308	GBM	TCGA Agilent
-0.0196923	GBM	TCGA Agilent
-1.30531	GBM	TCGA Agilent
-0.381615	GBM	TCGA Agilent
-0.106769	GBM	TCGA Agilent
0.126692	GBM	TCGA Agilent
0.563154	GBM	TCGA Agilent
0.592846	GBM	TCGA Agilent
-1.39708	GBM	TCGA Agilent
0.086	GBM	TCGA Agilent
-0.744	GBM	TCGA Agilent
-2.09254	GBM	TCGA Agilent
-0.329077	GBM	TCGA Agilent
-0.406231	GBM	TCGA Agilent
-0.642154	GBM	TCGA Agilent
-2.65962	GBM	TCGA Agilent
-0.168538	GBM	TCGA Agilent
-1.50123	GBM	TCGA Agilent
-0.131385	GBM	TCGA Agilent
-0.673231	GBM	TCGA Agilent
0.808154	GBM	TCGA Agilent
0.466692	GBM	TCGA Agilent
-0.786846	GBM	TCGA Agilent
-1.31685	GBM	TCGA Agilent
-3.18823	GBM	TCGA Agilent
0.817308	GBM	TCGA Agilent
-0.474385	GBM	TCGA Agilent
-1.44392	GBM	TCGA Agilent
-1.39554	GBM	TCGA Agilent
-1.27708	GBM	TCGA Agilent
-0.873923	GBM	TCGA Agilent
-1.55462	GBM	TCGA Agilent
-1.92208	GBM	TCGA Agilent
-0.451615	GBM	TCGA Agilent
-0.317462	GBM	TCGA Agilent
0.108615	GBM	TCGA Agilent
-0.460385	GBM	TCGA Agilent
-0.641077	GBM	TCGA Agilent
1.07792	GBM	TCGA Agilent
-0.549846	GBM	TCGA Agilent
0.186769	GBM	TCGA Agilent
0.272077	GBM	TCGA Agilent
-1.58208	GBM	TCGA Agilent
-0.203077	GBM	TCGA Agilent
-1.59831	GBM	TCGA Agilent
-0.777077	GBM	TCGA Agilent
0.276846	GBM	TCGA Agilent
-1.14254	GBM	TCGA Agilent
-0.0180769	GBM	TCGA Agilent
0.621462	GBM	TCGA Agilent
0.885308	GBM	TCGA Agilent
-0.299462	GBM	TCGA Agilent
-0.493308	GBM	TCGA Agilent
-0.0968462	GBM	TCGA Agilent
-0.904923	GBM	TCGA Agilent
-0.625923	GBM	TCGA Agilent
1.40877	GBM	TCGA Agilent
0.379615	GBM	TCGA Agilent
-1.29646	GBM	TCGA Agilent
-0.428769	GBM	TCGA Agilent
0.126077	GBM	TCGA Agilent
0.501308	GBM	TCGA Agilent
1.32146	GBM	TCGA Agilent
-0.0856154	GBM	TCGA Agilent
0.332692	GBM	TCGA Agilent
0.170462	GBM	TCGA Agilent
0.629077	GBM	TCGA Agilent
0.674769	GBM	TCGA Agilent
-1.09038	GBM	TCGA Agilent
0.447385	GBM	TCGA Agilent
0.146	GBM	TCGA Agilent
-0.402154	GBM	TCGA Agilent
0.297231	GBM	TCGA Agilent
-0.301077	GBM	TCGA Agilent
0.248077	GBM	TCGA Agilent
0.337308	GBM	TCGA Agilent
-0.196	GBM	TCGA Agilent
-0.967462	GBM	TCGA Agilent
-0.244231	GBM	TCGA Agilent
-0.478462	GBM	TCGA Agilent
0.259	GBM	TCGA Agilent
0.461462	GBM	TCGA Agilent
-0.890769	GBM	TCGA Agilent
-0.116308	GBM	TCGA Agilent
-0.155077	GBM	TCGA Agilent
0.101692	GBM	TCGA Agilent
-0.768615	GBM	TCGA Agilent
0.233231	GBM	TCGA Agilent
-0.631769	GBM	TCGA Agilent
-0.0270769	GBM	TCGA Agilent
0.665769	GBM	TCGA Agilent
0.310923	GBM	TCGA Agilent
-0.476077	GBM	TCGA Agilent
-1.04323	GBM	TCGA Agilent
0.408	GBM	TCGA Agilent
0.0763077	GBM	TCGA Agilent
0.0316154	GBM	TCGA Agilent
-0.987538	GBM	TCGA Agilent
0.253615	GBM	TCGA Agilent
0.353846	GBM	TCGA Agilent
-1.21608	GBM	TCGA Agilent
0.506769	GBM	TCGA Agilent
0.389231	GBM	TCGA Agilent
-0.175	GBM	TCGA Agilent
0.156846	GBM	TCGA Agilent
0.276154	GBM	TCGA Agilent
-0.650077	GBM	TCGA Agilent
0.882154	GBM	TCGA Agilent
-0.725923	GBM	TCGA Agilent
0.0266154	GBM	TCGA Agilent
0.182462	GBM	TCGA Agilent
-0.220231	GBM	TCGA Agilent
-0.418385	GBM	TCGA Agilent
-0.416385	GBM	TCGA Agilent
-0.149923	GBM	TCGA Agilent
-0.173077	GBM	TCGA Agilent
0.601538	GBM	TCGA Agilent
0.904077	GBM	TCGA Agilent
-0.580769	GBM	TCGA Agilent
-0.384692	GBM	TCGA Agilent
-0.474385	GBM	TCGA Agilent
0.0756154	GBM	TCGA Agilent
-0.565385	GBM	TCGA Agilent
-0.694385	GBM	TCGA Agilent
-1.23885	GBM	TCGA Agilent
-0.613846	GBM	TCGA Agilent
-0.565538	GBM	TCGA Agilent
-0.248769	GBM	TCGA Agilent
-0.018	GBM	TCGA Agilent
0.0763077	GBM	TCGA Agilent
0.332462	GBM	TCGA Agilent
0.695462	GBM	TCGA Agilent
-0.562462	GBM	TCGA Agilent
-0.0237692	GBM	TCGA Agilent
-0.467769	GBM	TCGA Agilent
1.12146	GBM	TCGA Agilent
-0.523	GBM	TCGA Agilent
0.145538	GBM	TCGA Agilent
-0.00853846	GBM	TCGA Agilent
0.199308	GBM	TCGA Agilent
0.082	GBM	TCGA Agilent
0.385615	GBM	TCGA Agilent
-0.622846	GBM	TCGA Agilent
-0.468769	GBM	TCGA Agilent
-1.20469	GBM	TCGA Agilent
-1.33246	GBM	TCGA Agilent
-1.64692	GBM	TCGA Agilent
0.729308	GBM	TCGA Agilent
-0.168385	GBM	TCGA Agilent
0.145308	GBM	TCGA Agilent
0.251462	GBM	TCGA Agilent
-0.840538	GBM	TCGA Agilent
0.443231	GBM	TCGA Agilent
-1.01238	GBM	TCGA Agilent
0.728615	GBM	TCGA Agilent
0.785154	GBM	TCGA Agilent
-0.975692	GBM	TCGA Agilent
0.140923	GBM	TCGA Agilent
-1.13608	GBM	TCGA Agilent
1.259	GBM	TCGA Agilent
0.245	GBM	TCGA Agilent
-0.451385	GBM	TCGA Agilent
-0.877615	GBM	TCGA Agilent
-0.346692	GBM	TCGA Agilent
-0.222692	GBM	TCGA Agilent
0.0596923	GBM	TCGA Agilent
-0.968077	GBM	TCGA Agilent
-0.590231	GBM	TCGA Agilent
0.145538	GBM	TCGA Agilent
-0.00853846	GBM	TCGA Agilent
0.199308	GBM	TCGA Agilent
0.082	GBM	TCGA Agilent
0.385615	GBM	TCGA Agilent
-0.622846	GBM	TCGA Agilent
-0.468769	GBM	TCGA Agilent
-1.20469	GBM	TCGA Agilent
-1.33246	GBM	TCGA Agilent
-1.64692	GBM	TCGA Agilent
0.729308	GBM	TCGA Agilent
-0.168385	GBM	TCGA Agilent
0.145308	GBM	TCGA Agilent
0.251462	GBM	TCGA Agilent
-0.840538	GBM	TCGA Agilent
0.443231	GBM	TCGA Agilent
-1.01238	GBM	TCGA Agilent
0.728615	GBM	TCGA Agilent
0.785154	GBM	TCGA Agilent
-0.975692	GBM	TCGA Agilent
0.140923	GBM	TCGA Agilent
-1.13608	GBM	TCGA Agilent
8.07264	Control	TCGA Rnaseq
8.17642	Control	TCGA Rnaseq
8.17846	Control	TCGA Rnaseq
8.31492	Control	TCGA Rnaseq
7.55128	GBM	TCGA Rnaseq
7.57294	GBM	TCGA Rnaseq
7.6502	GBM	TCGA Rnaseq
7.66914	GBM	TCGA Rnaseq
7.72248	GBM	TCGA Rnaseq
7.77276	GBM	TCGA Rnaseq
7.83841	GBM	TCGA Rnaseq
7.95895	GBM	TCGA Rnaseq
7.95996	GBM	TCGA Rnaseq
7.96452	GBM	TCGA Rnaseq
7.98994	GBM	TCGA Rnaseq
8.00573	GBM	TCGA Rnaseq
8.11346	GBM	TCGA Rnaseq
8.12979	GBM	TCGA Rnaseq
8.14539	GBM	TCGA Rnaseq
8.15869	GBM	TCGA Rnaseq
8.15979	GBM	TCGA Rnaseq
8.17091	GBM	TCGA Rnaseq
8.18672	GBM	TCGA Rnaseq
8.19556	GBM	TCGA Rnaseq
8.24934	GBM	TCGA Rnaseq
8.26019	GBM	TCGA Rnaseq
8.29044	GBM	TCGA Rnaseq
8.31015	GBM	TCGA Rnaseq
8.35614	GBM	TCGA Rnaseq
8.39788	GBM	TCGA Rnaseq
8.40088	GBM	TCGA Rnaseq
8.40103	GBM	TCGA Rnaseq
8.42651	GBM	TCGA Rnaseq
8.45384	GBM	TCGA Rnaseq
8.46882	GBM	TCGA Rnaseq
8.47049	GBM	TCGA Rnaseq
8.47886	GBM	TCGA Rnaseq
8.51734	GBM	TCGA Rnaseq
8.57725	GBM	TCGA Rnaseq
8.61759	GBM	TCGA Rnaseq
8.62798	GBM	TCGA Rnaseq
8.64481	GBM	TCGA Rnaseq
8.69175	GBM	TCGA Rnaseq
8.69242	GBM	TCGA Rnaseq
8.70011	GBM	TCGA Rnaseq
8.73059	GBM	TCGA Rnaseq
8.75248	GBM	TCGA Rnaseq
8.7791	GBM	TCGA Rnaseq
8.85263	GBM	TCGA Rnaseq
8.85653	GBM	TCGA Rnaseq
8.89077	GBM	TCGA Rnaseq
8.89922	GBM	TCGA Rnaseq
8.911	GBM	TCGA Rnaseq
8.91345	GBM	TCGA Rnaseq
8.91864	GBM	TCGA Rnaseq
8.92227	GBM	TCGA Rnaseq
8.93177	GBM	TCGA Rnaseq
8.94648	GBM	TCGA Rnaseq
8.9466	GBM	TCGA Rnaseq
8.9591	GBM	TCGA Rnaseq
8.9756	GBM	TCGA Rnaseq
8.99639	GBM	TCGA Rnaseq
9.00847	GBM	TCGA Rnaseq
9.01435	GBM	TCGA Rnaseq
9.01984	GBM	TCGA Rnaseq
9.02292	GBM	TCGA Rnaseq
9.02892	GBM	TCGA Rnaseq
9.03882	GBM	TCGA Rnaseq
9.04515	GBM	TCGA Rnaseq
9.05478	GBM	TCGA Rnaseq
9.06082	GBM	TCGA Rnaseq
9.0797	GBM	TCGA Rnaseq
9.11626	GBM	TCGA Rnaseq
9.11819	GBM	TCGA Rnaseq
9.11974	GBM	TCGA Rnaseq
9.1234	GBM	TCGA Rnaseq
9.13724	GBM	TCGA Rnaseq
9.13958	GBM	TCGA Rnaseq
9.15006	GBM	TCGA Rnaseq
9.21976	GBM	TCGA Rnaseq
9.23026	GBM	TCGA Rnaseq
9.24798	GBM	TCGA Rnaseq
9.26222	GBM	TCGA Rnaseq
9.26461	GBM	TCGA Rnaseq
9.27127	GBM	TCGA Rnaseq
9.28012	GBM	TCGA Rnaseq
9.2865	GBM	TCGA Rnaseq
9.29069	GBM	TCGA Rnaseq
9.29598	GBM	TCGA Rnaseq
9.30001	GBM	TCGA Rnaseq
9.33678	GBM	TCGA Rnaseq
9.3401	GBM	TCGA Rnaseq
9.36057	GBM	TCGA Rnaseq
9.38501	GBM	TCGA Rnaseq
9.42093	GBM	TCGA Rnaseq
9.43047	GBM	TCGA Rnaseq
9.44469	GBM	TCGA Rnaseq
9.45106	GBM	TCGA Rnaseq
9.45304	GBM	TCGA Rnaseq
9.47647	GBM	TCGA Rnaseq
9.49537	GBM	TCGA Rnaseq
9.49928	GBM	TCGA Rnaseq
9.50416	GBM	TCGA Rnaseq
9.50834	GBM	TCGA Rnaseq
9.56271	GBM	TCGA Rnaseq
9.5745	GBM	TCGA Rnaseq
9.58272	GBM	TCGA Rnaseq
9.589	GBM	TCGA Rnaseq
9.59075	GBM	TCGA Rnaseq
9.5944	GBM	TCGA Rnaseq
9.61844	GBM	TCGA Rnaseq
9.62058	GBM	TCGA Rnaseq
9.62558	GBM	TCGA Rnaseq
9.62636	GBM	TCGA Rnaseq
9.63633	GBM	TCGA Rnaseq
9.65143	GBM	TCGA Rnaseq
9.6766	GBM	TCGA Rnaseq
9.67802	GBM	TCGA Rnaseq
9.6908	GBM	TCGA Rnaseq
9.70574	GBM	TCGA Rnaseq
9.7132	GBM	TCGA Rnaseq
9.71907	GBM	TCGA Rnaseq
9.73162	GBM	TCGA Rnaseq
9.73998	GBM	TCGA Rnaseq
9.74638	GBM	TCGA Rnaseq
9.75414	GBM	TCGA Rnaseq
9.75992	GBM	TCGA Rnaseq
9.76569	GBM	TCGA Rnaseq
9.7745	GBM	TCGA Rnaseq
9.81321	GBM	TCGA Rnaseq
9.83667	GBM	TCGA Rnaseq
9.83963	GBM	TCGA Rnaseq
9.84686	GBM	TCGA Rnaseq
9.85579	GBM	TCGA Rnaseq
9.85832	GBM	TCGA Rnaseq
9.8931	GBM	TCGA Rnaseq
9.89636	GBM	TCGA Rnaseq
9.90364	GBM	TCGA Rnaseq
9.90861	GBM	TCGA Rnaseq
9.97574	GBM	TCGA Rnaseq
9.98548	GBM	TCGA Rnaseq
10.0133	GBM	TCGA Rnaseq
10.0673	GBM	TCGA Rnaseq
10.0791	GBM	TCGA Rnaseq
10.1024	GBM	TCGA Rnaseq
10.1144	GBM	TCGA Rnaseq
10.1266	GBM	TCGA Rnaseq
10.171	GBM	TCGA Rnaseq
10.1961	GBM	TCGA Rnaseq
10.2179	GBM	TCGA Rnaseq
10.2403	GBM	TCGA Rnaseq
10.2913	GBM	TCGA Rnaseq
10.4099	GBM	TCGA Rnaseq
10.4506	GBM	TCGA Rnaseq
10.4512	GBM	TCGA Rnaseq
10.4973	GBM	TCGA Rnaseq
10.6248	GBM	TCGA Rnaseq
10.7354	GBM	TCGA Rnaseq
10.826	GBM	TCGA Rnaseq
11.5071	GBM	TCGA Rnaseq

## Sheet: BOXPLOT_JAG1
expr	Condition	Dataset
5.3045	Control	Gravendeel
5.344	Control	Gravendeel
5.412	Control	Gravendeel
5.2136	Control	Gravendeel
5.4341	Control	Gravendeel
5.5793	Control	Gravendeel
5.0806	Control	Gravendeel
5.3129	Control	Gravendeel
7.8047	GBM	Gravendeel
5.8734	GBM	Gravendeel
7.7622	GBM	Gravendeel
5.0621	GBM	Gravendeel
6.1083	GBM	Gravendeel
7.3087	GBM	Gravendeel
6.9428	GBM	Gravendeel
8.3273	GBM	Gravendeel
7.7543	GBM	Gravendeel
6.1688	GBM	Gravendeel
6.1598	GBM	Gravendeel
5.5787	GBM	Gravendeel
6.2745	GBM	Gravendeel
6.162	GBM	Gravendeel
7.3554	GBM	Gravendeel
7.1969	GBM	Gravendeel
7.5669	GBM	Gravendeel
7.6983	GBM	Gravendeel
7.438	GBM	Gravendeel
7.2576	GBM	Gravendeel
6.6071	GBM	Gravendeel
6.9396	GBM	Gravendeel
5.3832	GBM	Gravendeel
8.0207	GBM	Gravendeel
6.4944	GBM	Gravendeel
6.569	GBM	Gravendeel
7.5526	GBM	Gravendeel
5.8193	GBM	Gravendeel
6.6951	GBM	Gravendeel
7.2237	GBM	Gravendeel
5.3765	GBM	Gravendeel
7.0896	GBM	Gravendeel
6.2877	GBM	Gravendeel
5.6351	GBM	Gravendeel
5.2283	GBM	Gravendeel
5.8693	GBM	Gravendeel
7.6334	GBM	Gravendeel
7.571	GBM	Gravendeel
6.5868	GBM	Gravendeel
7.0891	GBM	Gravendeel
6.9631	GBM	Gravendeel
7.09	GBM	Gravendeel
7.0789	GBM	Gravendeel
7.4399	GBM	Gravendeel
8.1682	GBM	Gravendeel
6.8597	GBM	Gravendeel
6.4231	GBM	Gravendeel
6.9593	GBM	Gravendeel
5.5232	GBM	Gravendeel
7.9165	GBM	Gravendeel
5.9252	GBM	Gravendeel
6.7409	GBM	Gravendeel
5.5337	GBM	Gravendeel
7.2691	GBM	Gravendeel
8.018	GBM	Gravendeel
7.0742	GBM	Gravendeel
8.3962	GBM	Gravendeel
7.0231	GBM	Gravendeel
8.7329	GBM	Gravendeel
5.9145	GBM	Gravendeel
5.8208	GBM	Gravendeel
8.3851	GBM	Gravendeel
7.1945	GBM	Gravendeel
7.5053	GBM	Gravendeel
7.285	GBM	Gravendeel
7.3285	GBM	Gravendeel
6.4073	GBM	Gravendeel
5.9873	GBM	Gravendeel
7.6117	GBM	Gravendeel
5.9031	GBM	Gravendeel
8.8695	GBM	Gravendeel
7.1972	GBM	Gravendeel
6.4898	GBM	Gravendeel
5.229	GBM	Gravendeel
6.8532	GBM	Gravendeel
5.9525	GBM	Gravendeel
8.6576	GBM	Gravendeel
7.9003	GBM	Gravendeel
6.7726	GBM	Gravendeel
7.7567	GBM	Gravendeel
7.2242	GBM	Gravendeel
7.7629	GBM	Gravendeel
8.5691	GBM	Gravendeel
7.1979	GBM	Gravendeel
6.115	GBM	Gravendeel
6.1384	GBM	Gravendeel
7.6871	GBM	Gravendeel
9.8947	GBM	Gravendeel
6.4068	GBM	Gravendeel
8.8996	GBM	Gravendeel
8.1617	GBM	Gravendeel
7.2376	GBM	Gravendeel
5.6956	GBM	Gravendeel
7.8039	GBM	Gravendeel
7.7343	GBM	Gravendeel
6.9294	GBM	Gravendeel
7.1566	GBM	Gravendeel
7.1104	GBM	Gravendeel
6.2807	GBM	Gravendeel
7.3549	GBM	Gravendeel
6.5777	GBM	Gravendeel
7.3383	GBM	Gravendeel
8.0351	GBM	Gravendeel
7.9008	GBM	Gravendeel
7.1837	GBM	Gravendeel
7.363	GBM	Gravendeel
6.4615	GBM	Gravendeel
9.3372	GBM	Gravendeel
6.5319	GBM	Gravendeel
5.555	GBM	Gravendeel
8.5355	GBM	Gravendeel
8.166	GBM	Gravendeel
7.1441	GBM	Gravendeel
9.1884	GBM	Gravendeel
7.4421	GBM	Gravendeel
8.3266	GBM	Gravendeel
8.9976	GBM	Gravendeel
7.8319	GBM	Gravendeel
7.4022	GBM	Gravendeel
6.8048	GBM	Gravendeel
8.3862	GBM	Gravendeel
7.1841	GBM	Gravendeel
7.9952	GBM	Gravendeel
9.0569	GBM	Gravendeel
6.4533	GBM	Gravendeel
8.7666	GBM	Gravendeel
8.3062	GBM	Gravendeel
7.6799	GBM	Gravendeel
8.2615	GBM	Gravendeel
8.1473	GBM	Gravendeel
9.762	GBM	Gravendeel
6.5934	GBM	Gravendeel
7.8854	GBM	Gravendeel
7.6998	GBM	Gravendeel
7.5427	GBM	Gravendeel
7.1896	GBM	Gravendeel
7.4006	GBM	Gravendeel
6.9247	GBM	Gravendeel
6.6239	GBM	Gravendeel
6.0282	GBM	Gravendeel
7.0815	GBM	Gravendeel
7.9167	GBM	Gravendeel
7.0191	GBM	Gravendeel
7.0829	GBM	Gravendeel
8.0937	GBM	Gravendeel
7.1246	GBM	Gravendeel
6.2906	GBM	Gravendeel
6.5279	GBM	Gravendeel
6.6265	GBM	Gravendeel
7.398	GBM	Gravendeel
8.5167	GBM	Gravendeel
6.7911	GBM	Gravendeel
7.1709	GBM	Gravendeel
5.5475	GBM	Gravendeel
7.3374	GBM	Gravendeel
7.1043	GBM	Gravendeel
7.9523	GBM	Gravendeel
6.2566	GBM	Gravendeel
8.3583	GBM	Gravendeel
-1.16938	Control	TCGA Affymetrix
-1.07975	Control	TCGA Affymetrix
-0.536625	Control	TCGA Affymetrix
0.501375	Control	TCGA Affymetrix
-0.663125	Control	TCGA Affymetrix
-0.2935	Control	TCGA Affymetrix
-0.643375	Control	TCGA Affymetrix
-0.0005	Control	TCGA Affymetrix
-0.401125	Control	TCGA Affymetrix
6.251	GBM	TCGA Affymetrix
8.3299	GBM	TCGA Affymetrix
8.248	GBM	TCGA Affymetrix
6.1844	GBM	TCGA Affymetrix
7.8046	GBM	TCGA Affymetrix
10.0535	GBM	TCGA Affymetrix
6.5862	GBM	TCGA Affymetrix
7.3998	GBM	TCGA Affymetrix
9.0978	GBM	TCGA Affymetrix
9.8767	GBM	TCGA Affymetrix
8.3813	GBM	TCGA Affymetrix
7.6557	GBM	TCGA Affymetrix
7.2469	GBM	TCGA Affymetrix
7.1874	GBM	TCGA Affymetrix
7.3946	GBM	TCGA Affymetrix
7.0424	GBM	TCGA Affymetrix
7.2606	GBM	TCGA Affymetrix
8.2259	GBM	TCGA Affymetrix
7.221	GBM	TCGA Affymetrix
4.843	GBM	TCGA Affymetrix
8.9443	GBM	TCGA Affymetrix
7.8984	GBM	TCGA Affymetrix
9.9709	GBM	TCGA Affymetrix
5.8864	GBM	TCGA Affymetrix
9.3603	GBM	TCGA Affymetrix
6.9717	GBM	TCGA Affymetrix
7.7152	GBM	TCGA Affymetrix
6.7784	GBM	TCGA Affymetrix
8.1258	GBM	TCGA Affymetrix
7.5371	GBM	TCGA Affymetrix
8.1508	GBM	TCGA Affymetrix
7.1067	GBM	TCGA Affymetrix
8.7721	GBM	TCGA Affymetrix
8.5192	GBM	TCGA Affymetrix
8.808	GBM	TCGA Affymetrix
8.276	GBM	TCGA Affymetrix
9.0402	GBM	TCGA Affymetrix
8.1099	GBM	TCGA Affymetrix
9.028	GBM	TCGA Affymetrix
6.5199	GBM	TCGA Affymetrix
7.7686	GBM	TCGA Affymetrix
9.2795	GBM	TCGA Affymetrix
8.3934	GBM	TCGA Affymetrix
6.7883	GBM	TCGA Affymetrix
9.3077	GBM	TCGA Affymetrix
7.7798	GBM	TCGA Affymetrix
8.6386	GBM	TCGA Affymetrix
8.2662	GBM	TCGA Affymetrix
8.9528	GBM	TCGA Affymetrix
7.7368	GBM	TCGA Affymetrix
8.9048	GBM	TCGA Affymetrix
7.9321	GBM	TCGA Affymetrix
8.6337	GBM	TCGA Affymetrix
8.5074	GBM	TCGA Affymetrix
7.7798	GBM	TCGA Affymetrix
8.8775	GBM	TCGA Affymetrix
7.3214	GBM	TCGA Affymetrix
6.4749	GBM	TCGA Affymetrix
8.9478	GBM	TCGA Affymetrix
9.003	GBM	TCGA Affymetrix
9.851	GBM	TCGA Affymetrix
7.7397	GBM	TCGA Affymetrix
8.8743	GBM	TCGA Affymetrix
8.9763	GBM	TCGA Affymetrix
9.313	GBM	TCGA Affymetrix
9.4625	GBM	TCGA Affymetrix
8.4572	GBM	TCGA Affymetrix
7.5116	GBM	TCGA Affymetrix
7.4734	GBM	TCGA Affymetrix
6.7642	GBM	TCGA Affymetrix
7.837	GBM	TCGA Affymetrix
6.6135	GBM	TCGA Affymetrix
8.9137	GBM	TCGA Affymetrix
9.3974	GBM	TCGA Affymetrix
7.9355	GBM	TCGA Affymetrix
8.8111	GBM	TCGA Affymetrix
9.0088	GBM	TCGA Affymetrix
8.6011	GBM	TCGA Affymetrix
8.7113	GBM	TCGA Affymetrix
6.6971	GBM	TCGA Affymetrix
7.043	GBM	TCGA Affymetrix
7.5187	GBM	TCGA Affymetrix
6.7424	GBM	TCGA Affymetrix
7.3658	GBM	TCGA Affymetrix
6.3817	GBM	TCGA Affymetrix
7.5236	GBM	TCGA Affymetrix
7.6312	GBM	TCGA Affymetrix
8.7976	GBM	TCGA Affymetrix
9.1876	GBM	TCGA Affymetrix
7.0497	GBM	TCGA Affymetrix
8.6774	GBM	TCGA Affymetrix
9.0236	GBM	TCGA Affymetrix
9.6238	GBM	TCGA Affymetrix
10.1664	GBM	TCGA Affymetrix
8.8618	GBM	TCGA Affymetrix
7.3812	GBM	TCGA Affymetrix
8.2354	GBM	TCGA Affymetrix
9.0847	GBM	TCGA Affymetrix
6.543	GBM	TCGA Affymetrix
7.0309	GBM	TCGA Affymetrix
9.6771	GBM	TCGA Affymetrix
8.3212	GBM	TCGA Affymetrix
7.2142	GBM	TCGA Affymetrix
6.7395	GBM	TCGA Affymetrix
7.2542	GBM	TCGA Affymetrix
6.4008	GBM	TCGA Affymetrix
8.1607	GBM	TCGA Affymetrix
9.1194	GBM	TCGA Affymetrix
7.28	GBM	TCGA Affymetrix
8.2452	GBM	TCGA Affymetrix
8.6417	GBM	TCGA Affymetrix
7.9586	GBM	TCGA Affymetrix
9.0699	GBM	TCGA Affymetrix
8.9071	GBM	TCGA Affymetrix
7.6078	GBM	TCGA Affymetrix
7.4384	GBM	TCGA Affymetrix
9.392	GBM	TCGA Affymetrix
8.3268	GBM	TCGA Affymetrix
5.6097	GBM	TCGA Affymetrix
6.404	GBM	TCGA Affymetrix
8.9477	GBM	TCGA Affymetrix
8.1448	GBM	TCGA Affymetrix
5.5191	GBM	TCGA Affymetrix
7.6135	GBM	TCGA Affymetrix
8.4343	GBM	TCGA Affymetrix
8.1234	GBM	TCGA Affymetrix
7.7122	GBM	TCGA Affymetrix
8.0596	GBM	TCGA Affymetrix
9.4101	GBM	TCGA Affymetrix
8.1587	GBM	TCGA Affymetrix
7.111	GBM	TCGA Affymetrix
7.975	GBM	TCGA Affymetrix
8.123	GBM	TCGA Affymetrix
8.8617	GBM	TCGA Affymetrix
7.9713	GBM	TCGA Affymetrix
7.6803	GBM	TCGA Affymetrix
8.8082	GBM	TCGA Affymetrix
7.1766	GBM	TCGA Affymetrix
8.5558	GBM	TCGA Affymetrix
8.4245	GBM	TCGA Affymetrix
9.2128	GBM	TCGA Affymetrix
7.6245	GBM	TCGA Affymetrix
8.1548	GBM	TCGA Affymetrix
8.1916	GBM	TCGA Affymetrix
7.4854	GBM	TCGA Affymetrix
8.5809	GBM	TCGA Affymetrix
8.6066	GBM	TCGA Affymetrix
8.5234	GBM	TCGA Affymetrix
9.1621	GBM	TCGA Affymetrix
7.3144	GBM	TCGA Affymetrix
8.7978	GBM	TCGA Affymetrix
7.6123	GBM	TCGA Affymetrix
7.5537	GBM	TCGA Affymetrix
7.8287	GBM	TCGA Affymetrix
7.2279	GBM	TCGA Affymetrix
7.1643	GBM	TCGA Affymetrix
5.883	GBM	TCGA Affymetrix
8.0167	GBM	TCGA Affymetrix
9.2963	GBM	TCGA Affymetrix
6.9699	GBM	TCGA Affymetrix
10.2654	GBM	TCGA Affymetrix
8.2608	GBM	TCGA Affymetrix
8.3929	GBM	TCGA Affymetrix
8.38	GBM	TCGA Affymetrix
7.5983	GBM	TCGA Affymetrix
7.2517	GBM	TCGA Affymetrix
9.387	GBM	TCGA Affymetrix
8.8621	GBM	TCGA Affymetrix
8.8138	GBM	TCGA Affymetrix
7.1482	GBM	TCGA Affymetrix
6.6072	GBM	TCGA Affymetrix
9.2372	GBM	TCGA Affymetrix
6.7537	GBM	TCGA Affymetrix
8.6099	GBM	TCGA Affymetrix
8.9801	GBM	TCGA Affymetrix
8.6273	GBM	TCGA Affymetrix
8.2402	GBM	TCGA Affymetrix
6.0659	GBM	TCGA Affymetrix
8.175	GBM	TCGA Affymetrix
7.3916	GBM	TCGA Affymetrix
7.7241	GBM	TCGA Affymetrix
8.453	GBM	TCGA Affymetrix
8.4528	GBM	TCGA Affymetrix
7.733	GBM	TCGA Affymetrix
7.3312	GBM	TCGA Affymetrix
7.9788	GBM	TCGA Affymetrix
7.5931	GBM	TCGA Affymetrix
8.3827	GBM	TCGA Affymetrix
10.1621	GBM	TCGA Affymetrix
7.3092	GBM	TCGA Affymetrix
8.0048	GBM	TCGA Affymetrix
7.5957	GBM	TCGA Affymetrix
8.559	GBM	TCGA Affymetrix
7.1542	GBM	TCGA Affymetrix
7.1169	GBM	TCGA Affymetrix
10.036	GBM	TCGA Affymetrix
7.6929	GBM	TCGA Affymetrix
9.161	GBM	TCGA Affymetrix
8.0348	GBM	TCGA Affymetrix
9.9746	GBM	TCGA Affymetrix
9.7084	GBM	TCGA Affymetrix
8.584	GBM	TCGA Affymetrix
10.2345	GBM	TCGA Affymetrix
8.4271	GBM	TCGA Affymetrix
7.1412	GBM	TCGA Affymetrix
7.5674	GBM	TCGA Affymetrix
8.4172	GBM	TCGA Affymetrix
9.2853	GBM	TCGA Affymetrix
7.7633	GBM	TCGA Affymetrix
7.7419	GBM	TCGA Affymetrix
8.4336	GBM	TCGA Affymetrix
8.6182	GBM	TCGA Affymetrix
8.719	GBM	TCGA Affymetrix
9.1726	GBM	TCGA Affymetrix
9.2369	GBM	TCGA Affymetrix
8.789	GBM	TCGA Affymetrix
8.5737	GBM	TCGA Affymetrix
9.9102	GBM	TCGA Affymetrix
8.9679	GBM	TCGA Affymetrix
7.9845	GBM	TCGA Affymetrix
7.4739	GBM	TCGA Affymetrix
9.2314	GBM	TCGA Affymetrix
10.2512	GBM	TCGA Affymetrix
7.9525	GBM	TCGA Affymetrix
8.119	GBM	TCGA Affymetrix
8.7653	GBM	TCGA Affymetrix
6.458	GBM	TCGA Affymetrix
6.7388	GBM	TCGA Affymetrix
7.7584	GBM	TCGA Affymetrix
7.2153	GBM	TCGA Affymetrix
7.2131	GBM	TCGA Affymetrix
7.9113	GBM	TCGA Affymetrix
7.7604	GBM	TCGA Affymetrix
7.0848	GBM	TCGA Affymetrix
9.3087	GBM	TCGA Affymetrix
9.038	GBM	TCGA Affymetrix
7.912	GBM	TCGA Affymetrix
8.2826	GBM	TCGA Affymetrix
9.8416	GBM	TCGA Affymetrix
8.546	GBM	TCGA Affymetrix
8.7221	GBM	TCGA Affymetrix
7.6579	GBM	TCGA Affymetrix
6.9273	GBM	TCGA Affymetrix
7.1964	GBM	TCGA Affymetrix
8.7823	GBM	TCGA Affymetrix
6.1284	GBM	TCGA Affymetrix
8.2968	GBM	TCGA Affymetrix
6.8995	GBM	TCGA Affymetrix
7.8216	GBM	TCGA Affymetrix
7.5401	GBM	TCGA Affymetrix
9.9984	GBM	TCGA Affymetrix
8.2834	GBM	TCGA Affymetrix
8.5963	GBM	TCGA Affymetrix
10.1086	GBM	TCGA Affymetrix
7.9879	GBM	TCGA Affymetrix
9.3732	GBM	TCGA Affymetrix
9.1221	GBM	TCGA Affymetrix
7.7821	GBM	TCGA Affymetrix
8.6293	GBM	TCGA Affymetrix
6.8588	GBM	TCGA Affymetrix
8.728	GBM	TCGA Affymetrix
7.4573	GBM	TCGA Affymetrix
7.846	GBM	TCGA Affymetrix
8.8263	GBM	TCGA Affymetrix
8.5628	GBM	TCGA Affymetrix
8.7424	GBM	TCGA Affymetrix
8.2132	GBM	TCGA Affymetrix
8.1033	GBM	TCGA Affymetrix
7.471	GBM	TCGA Affymetrix
9.1292	GBM	TCGA Affymetrix
7.6178	GBM	TCGA Affymetrix
8.737	GBM	TCGA Affymetrix
7.3182	GBM	TCGA Affymetrix
7.0561	GBM	TCGA Affymetrix
8.7739	GBM	TCGA Affymetrix
8.5421	GBM	TCGA Affymetrix
8.0373	GBM	TCGA Affymetrix
7.7435	GBM	TCGA Affymetrix
7.3654	GBM	TCGA Affymetrix
7.539	GBM	TCGA Affymetrix
7.0392	GBM	TCGA Affymetrix
7.3634	GBM	TCGA Affymetrix
7.5737	GBM	TCGA Affymetrix
8.4417	GBM	TCGA Affymetrix
6.9217	GBM	TCGA Affymetrix
8.8817	GBM	TCGA Affymetrix
8.1609	GBM	TCGA Affymetrix
8.6964	GBM	TCGA Affymetrix
8.1073	GBM	TCGA Affymetrix
7.8559	GBM	TCGA Affymetrix
8.8177	GBM	TCGA Affymetrix
7.1231	GBM	TCGA Affymetrix
6.8704	GBM	TCGA Affymetrix
6.9217	GBM	TCGA Affymetrix
6.9003	GBM	TCGA Affymetrix
6.878	GBM	TCGA Affymetrix
8.1948	GBM	TCGA Affymetrix
7.1644	GBM	TCGA Affymetrix
6.6971	GBM	TCGA Affymetrix
8.7275	GBM	TCGA Affymetrix
7.186	GBM	TCGA Affymetrix
7.0247	GBM	TCGA Affymetrix
7.1667	GBM	TCGA Affymetrix
7.1646	GBM	TCGA Affymetrix
6.6502	GBM	TCGA Affymetrix
8.6722	GBM	TCGA Affymetrix
6.8627	GBM	TCGA Affymetrix
8.0929	GBM	TCGA Affymetrix
8.9912	GBM	TCGA Affymetrix
7.0655	GBM	TCGA Affymetrix
7.2078	GBM	TCGA Affymetrix
6.6417	GBM	TCGA Affymetrix
10.0225	GBM	TCGA Affymetrix
8.5304	GBM	TCGA Affymetrix
8.841	GBM	TCGA Affymetrix
6.8821	GBM	TCGA Affymetrix
9.3946	GBM	TCGA Affymetrix
8.5728	GBM	TCGA Affymetrix
8.0713	GBM	TCGA Affymetrix
9.3432	GBM	TCGA Affymetrix
8.03	GBM	TCGA Affymetrix
6.9903	GBM	TCGA Affymetrix
9.6648	GBM	TCGA Affymetrix
8.5059	GBM	TCGA Affymetrix
9.4645	GBM	TCGA Affymetrix
8.4683	GBM	TCGA Affymetrix
8.6074	GBM	TCGA Affymetrix
8.2619	GBM	TCGA Affymetrix
6.3864	GBM	TCGA Affymetrix
7.2642	GBM	TCGA Affymetrix
8.1703	GBM	TCGA Affymetrix
7.9462	GBM	TCGA Affymetrix
9.4472	GBM	TCGA Affymetrix
7.7113	GBM	TCGA Affymetrix
5.6186	GBM	TCGA Affymetrix
6.9404	GBM	TCGA Affymetrix
6.8473	GBM	TCGA Affymetrix
7.882	GBM	TCGA Affymetrix
7.3167	GBM	TCGA Affymetrix
7.3127	GBM	TCGA Affymetrix
6.8468	GBM	TCGA Affymetrix
8.4235	GBM	TCGA Affymetrix
8.9946	GBM	TCGA Affymetrix
7.3462	GBM	TCGA Affymetrix
7.1276	GBM	TCGA Affymetrix
7.5901	GBM	TCGA Affymetrix
6.5314	GBM	TCGA Affymetrix
7.3129	GBM	TCGA Affymetrix
7.7598	GBM	TCGA Affymetrix
8.761	GBM	TCGA Affymetrix
7.9187	GBM	TCGA Affymetrix
7.3401	GBM	TCGA Affymetrix
7.2297	GBM	TCGA Affymetrix
7.9356	GBM	TCGA Affymetrix
7.6969	GBM	TCGA Affymetrix
8.6028	GBM	TCGA Affymetrix
9.8055	GBM	TCGA Affymetrix
7.3535	GBM	TCGA Affymetrix
8.6783	GBM	TCGA Affymetrix
7.4638	GBM	TCGA Affymetrix
8.301	GBM	TCGA Affymetrix
8.1298	GBM	TCGA Affymetrix
6.4352	GBM	TCGA Affymetrix
9.1115	GBM	TCGA Affymetrix
9.1681	GBM	TCGA Affymetrix
6.5025	GBM	TCGA Affymetrix
6.9515	GBM	TCGA Affymetrix
7.4741	GBM	TCGA Affymetrix
7.6917	GBM	TCGA Affymetrix
7.6657	GBM	TCGA Affymetrix
6.6684	GBM	TCGA Affymetrix
7.0647	GBM	TCGA Affymetrix
9.6014	GBM	TCGA Affymetrix
8.6151	GBM	TCGA Affymetrix
7.6216	GBM	TCGA Affymetrix
8.4701	GBM	TCGA Affymetrix
9.2335	GBM	TCGA Affymetrix
8.0415	GBM	TCGA Affymetrix
7.3447	GBM	TCGA Affymetrix
7.7014	GBM	TCGA Affymetrix
7.3037	GBM	TCGA Affymetrix
7.78	GBM	TCGA Affymetrix
6.7502	GBM	TCGA Affymetrix
6.7544	GBM	TCGA Affymetrix
7.1248	GBM	TCGA Affymetrix
7.6878	GBM	TCGA Affymetrix
9.4758	GBM	TCGA Affymetrix
6.5371	GBM	TCGA Affymetrix
9.4729	GBM	TCGA Affymetrix
8.1059	GBM	TCGA Affymetrix
9.3591	GBM	TCGA Affymetrix
7.0564	GBM	TCGA Affymetrix
9.6939	GBM	TCGA Affymetrix
7.0453	GBM	TCGA Affymetrix
6.0947	GBM	TCGA Affymetrix
7.5797	GBM	TCGA Affymetrix
9.2673	GBM	TCGA Affymetrix
7.866	GBM	TCGA Affymetrix
8.5972	GBM	TCGA Affymetrix
7.1997	GBM	TCGA Affymetrix
6.8074	GBM	TCGA Affymetrix
8.2977	GBM	TCGA Affymetrix
8.5893	GBM	TCGA Affymetrix
7.9144	GBM	TCGA Affymetrix
7.226	GBM	TCGA Affymetrix
9.9557	GBM	TCGA Affymetrix
8.6463	GBM	TCGA Affymetrix
8.8302	GBM	TCGA Affymetrix
10.06	GBM	TCGA Affymetrix
10.4874	GBM	TCGA Affymetrix
8.9914	GBM	TCGA Affymetrix
9.4719	GBM	TCGA Affymetrix
8.694	GBM	TCGA Affymetrix
9.2444	GBM	TCGA Affymetrix
8.8124	GBM	TCGA Affymetrix
9.2321	GBM	TCGA Affymetrix
10.0498	GBM	TCGA Affymetrix
6.7565	GBM	TCGA Affymetrix
8.9523	GBM	TCGA Affymetrix
7.9788	GBM	TCGA Affymetrix
8.5066	GBM	TCGA Affymetrix
8.6401	GBM	TCGA Affymetrix
9.3151	GBM	TCGA Affymetrix
8.23	GBM	TCGA Affymetrix
9.8925	GBM	TCGA Affymetrix
8.2469	GBM	TCGA Affymetrix
9.1554	GBM	TCGA Affymetrix
5.5918	GBM	TCGA Affymetrix
9.1121	GBM	TCGA Affymetrix
7.5977	GBM	TCGA Affymetrix
9.3177	GBM	TCGA Affymetrix
6.0286	GBM	TCGA Affymetrix
9.335	GBM	TCGA Affymetrix
6.6403	GBM	TCGA Affymetrix
9.8851	GBM	TCGA Affymetrix
8.0736	GBM	TCGA Affymetrix
8.9569	GBM	TCGA Affymetrix
7.5764	GBM	TCGA Affymetrix
7.6833	GBM	TCGA Affymetrix
7.2886	GBM	TCGA Affymetrix
8.2321	GBM	TCGA Affymetrix
10.1661	GBM	TCGA Affymetrix
9.2824	GBM	TCGA Affymetrix
8.141	GBM	TCGA Affymetrix
8.0317	GBM	TCGA Affymetrix
9.5807	GBM	TCGA Affymetrix
6.2236	GBM	TCGA Affymetrix
6.7501	GBM	TCGA Affymetrix
7.1489	GBM	TCGA Affymetrix
8.6938	GBM	TCGA Affymetrix
7.734	GBM	TCGA Affymetrix
9.4027	GBM	TCGA Affymetrix
6.5971	GBM	TCGA Affymetrix
8.8607	GBM	TCGA Affymetrix
9.4728	GBM	TCGA Affymetrix
6.1965	GBM	TCGA Affymetrix
7.646	GBM	TCGA Affymetrix
9.433	GBM	TCGA Affymetrix
8.4684	GBM	TCGA Affymetrix
8.3158	GBM	TCGA Affymetrix
7.7886	GBM	TCGA Affymetrix
7.3767	GBM	TCGA Affymetrix
8.4634	GBM	TCGA Affymetrix
7.6196	GBM	TCGA Affymetrix
9.6332	GBM	TCGA Affymetrix
11.8065	GBM	TCGA Affymetrix
7.3173	GBM	TCGA Affymetrix
7.9882	GBM	TCGA Affymetrix
9.7695	GBM	TCGA Affymetrix
7.7155	GBM	TCGA Affymetrix
6.3112	GBM	TCGA Affymetrix
10.4685	GBM	TCGA Affymetrix
10.3149	GBM	TCGA Affymetrix
10.7981	GBM	TCGA Affymetrix
8.704	GBM	TCGA Affymetrix
9.1521	GBM	TCGA Affymetrix
10.1231	GBM	TCGA Affymetrix
8.3791	GBM	TCGA Affymetrix
9.9664	GBM	TCGA Affymetrix
8.0323	GBM	TCGA Affymetrix
9.0754	GBM	TCGA Affymetrix
9.9064	GBM	TCGA Affymetrix
9.1805	GBM	TCGA Affymetrix
8.5523	GBM	TCGA Affymetrix
8.9748	GBM	TCGA Affymetrix
9.2514	GBM	TCGA Affymetrix
7.688	GBM	TCGA Affymetrix
8.0987	GBM	TCGA Affymetrix
9.6403	GBM	TCGA Affymetrix
9.5567	GBM	TCGA Affymetrix
8.5017	GBM	TCGA Affymetrix
8.6941	GBM	TCGA Affymetrix
8.0883	GBM	TCGA Affymetrix
7.443	GBM	TCGA Affymetrix
7.8004	GBM	TCGA Affymetrix
9.753	GBM	TCGA Affymetrix
9.7774	GBM	TCGA Affymetrix
8.4526	GBM	TCGA Affymetrix
8.3469	GBM	TCGA Affymetrix
8.2861	GBM	TCGA Affymetrix
8.5891	GBM	TCGA Affymetrix
7.451	GBM	TCGA Affymetrix
9.2613	GBM	TCGA Affymetrix
7.2828	GBM	TCGA Affymetrix
10.0795	GBM	TCGA Affymetrix
6.5544	GBM	TCGA Affymetrix
7.7799	GBM	TCGA Affymetrix
7.807	GBM	TCGA Affymetrix
9.3721	GBM	TCGA Affymetrix
7.3912	GBM	TCGA Affymetrix
8.9458	GBM	TCGA Affymetrix
8.896	GBM	TCGA Affymetrix
8.9629	GBM	TCGA Affymetrix
9.1099	GBM	TCGA Affymetrix
8.0513	GBM	TCGA Affymetrix
9.3734	GBM	TCGA Affymetrix
7.8718	GBM	TCGA Affymetrix
8.1566	GBM	TCGA Affymetrix
9.7975	GBM	TCGA Affymetrix
8.3685	GBM	TCGA Affymetrix
9.1111	GBM	TCGA Affymetrix
9.2745	GBM	TCGA Affymetrix
8.8063	GBM	TCGA Affymetrix
8.016	GBM	TCGA Affymetrix
7.9685	GBM	TCGA Affymetrix
7.6277	GBM	TCGA Affymetrix
9.0042	GBM	TCGA Affymetrix
10.31	GBM	TCGA Affymetrix
-1.16938	Control	TCGA Agilent
-1.07975	Control	TCGA Agilent
-0.536625	Control	TCGA Agilent
0.501375	Control	TCGA Agilent
-0.663125	Control	TCGA Agilent
-0.2935	Control	TCGA Agilent
-0.643375	Control	TCGA Agilent
-0.0005	Control	TCGA Agilent
-0.401125	Control	TCGA Agilent
-0.478875	Control	TCGA Agilent
0.82825	GBM	TCGA Agilent
2.11925	GBM	TCGA Agilent
1.387	GBM	TCGA Agilent
-0.065875	GBM	TCGA Agilent
2.266	GBM	TCGA Agilent
1.73737	GBM	TCGA Agilent
0.43275	GBM	TCGA Agilent
0.401625	GBM	TCGA Agilent
1.91975	GBM	TCGA Agilent
2.29712	GBM	TCGA Agilent
2.13013	GBM	TCGA Agilent
1.24075	GBM	TCGA Agilent
1.7515	GBM	TCGA Agilent
1.23638	GBM	TCGA Agilent
0.5985	GBM	TCGA Agilent
1.74438	GBM	TCGA Agilent
2.3415	GBM	TCGA Agilent
1.41975	GBM	TCGA Agilent
1.4005	GBM	TCGA Agilent
1.95362	GBM	TCGA Agilent
2.32938	GBM	TCGA Agilent
2.8445	GBM	TCGA Agilent
2.31612	GBM	TCGA Agilent
1.17312	GBM	TCGA Agilent
2.33387	GBM	TCGA Agilent
0.676125	GBM	TCGA Agilent
0.945125	GBM	TCGA Agilent
0.992875	GBM	TCGA Agilent
1.20863	GBM	TCGA Agilent
-0.2535	GBM	TCGA Agilent
1.35662	GBM	TCGA Agilent
1.36225	GBM	TCGA Agilent
1.69887	GBM	TCGA Agilent
1.55987	GBM	TCGA Agilent
2.00137	GBM	TCGA Agilent
1.81475	GBM	TCGA Agilent
1.973	GBM	TCGA Agilent
1.17263	GBM	TCGA Agilent
1.54438	GBM	TCGA Agilent
0.020125	GBM	TCGA Agilent
0.663875	GBM	TCGA Agilent
2.08775	GBM	TCGA Agilent
1.72863	GBM	TCGA Agilent
-0.08075	GBM	TCGA Agilent
1.859	GBM	TCGA Agilent
2.24613	GBM	TCGA Agilent
1.60662	GBM	TCGA Agilent
1.25625	GBM	TCGA Agilent
1.654	GBM	TCGA Agilent
0.88425	GBM	TCGA Agilent
2.03337	GBM	TCGA Agilent
1.2305	GBM	TCGA Agilent
2.252	GBM	TCGA Agilent
1.14237	GBM	TCGA Agilent
0.834125	GBM	TCGA Agilent
1.55363	GBM	TCGA Agilent
2.27913	GBM	TCGA Agilent
-0.215875	GBM	TCGA Agilent
2.33763	GBM	TCGA Agilent
1.94962	GBM	TCGA Agilent
3.25475	GBM	TCGA Agilent
1.135	GBM	TCGA Agilent
2.03925	GBM	TCGA Agilent
2.24187	GBM	TCGA Agilent
2.93087	GBM	TCGA Agilent
3.114	GBM	TCGA Agilent
2.22463	GBM	TCGA Agilent
0.81225	GBM	TCGA Agilent
1.6125	GBM	TCGA Agilent
-0.298875	GBM	TCGA Agilent
1.35337	GBM	TCGA Agilent
-0.2065	GBM	TCGA Agilent
2.48225	GBM	TCGA Agilent
2.57925	GBM	TCGA Agilent
1.67637	GBM	TCGA Agilent
2.26037	GBM	TCGA Agilent
1.84213	GBM	TCGA Agilent
2.04162	GBM	TCGA Agilent
1.80038	GBM	TCGA Agilent
-0.007125	GBM	TCGA Agilent
0.7605	GBM	TCGA Agilent
0.84775	GBM	TCGA Agilent
0.40125	GBM	TCGA Agilent
0.702625	GBM	TCGA Agilent
-0.207625	GBM	TCGA Agilent
0.748125	GBM	TCGA Agilent
1.11712	GBM	TCGA Agilent
2.19787	GBM	TCGA Agilent
2.347	GBM	TCGA Agilent
0.68375	GBM	TCGA Agilent
1.95463	GBM	TCGA Agilent
2.16113	GBM	TCGA Agilent
2.13825	GBM	TCGA Agilent
2.69563	GBM	TCGA Agilent
1.92875	GBM	TCGA Agilent
0.610875	GBM	TCGA Agilent
1.32625	GBM	TCGA Agilent
2.36425	GBM	TCGA Agilent
0.402875	GBM	TCGA Agilent
0.835125	GBM	TCGA Agilent
2.96413	GBM	TCGA Agilent
2.11713	GBM	TCGA Agilent
0.94975	GBM	TCGA Agilent
0.396625	GBM	TCGA Agilent
0.525625	GBM	TCGA Agilent
-0.0905	GBM	TCGA Agilent
1.68087	GBM	TCGA Agilent
2.08975	GBM	TCGA Agilent
1.08638	GBM	TCGA Agilent
2.3	GBM	TCGA Agilent
1.727	GBM	TCGA Agilent
1.43325	GBM	TCGA Agilent
2.13025	GBM	TCGA Agilent
2.26613	GBM	TCGA Agilent
1.48063	GBM	TCGA Agilent
0.99725	GBM	TCGA Agilent
2.97525	GBM	TCGA Agilent
1.79225	GBM	TCGA Agilent
-0.513125	GBM	TCGA Agilent
-0.015375	GBM	TCGA Agilent
2.3895	GBM	TCGA Agilent
1.5135	GBM	TCGA Agilent
-0.507875	GBM	TCGA Agilent
0.88775	GBM	TCGA Agilent
1.71437	GBM	TCGA Agilent
1.758	GBM	TCGA Agilent
1.54087	GBM	TCGA Agilent
1.80862	GBM	TCGA Agilent
2.5545	GBM	TCGA Agilent
1.72325	GBM	TCGA Agilent
0.59175	GBM	TCGA Agilent
1.37563	GBM	TCGA Agilent
1.51875	GBM	TCGA Agilent
2.18788	GBM	TCGA Agilent
1.59125	GBM	TCGA Agilent
1.31987	GBM	TCGA Agilent
2.52962	GBM	TCGA Agilent
0.968375	GBM	TCGA Agilent
1.99125	GBM	TCGA Agilent
1.85438	GBM	TCGA Agilent
2.44675	GBM	TCGA Agilent
1.08075	GBM	TCGA Agilent
1.63338	GBM	TCGA Agilent
1.50212	GBM	TCGA Agilent
-0.097	GBM	TCGA Agilent
2.02787	GBM	TCGA Agilent
2.46088	GBM	TCGA Agilent
2.36463	GBM	TCGA Agilent
3.09437	GBM	TCGA Agilent
1.1565	GBM	TCGA Agilent
2.12763	GBM	TCGA Agilent
-0.5315	GBM	TCGA Agilent
1.076	GBM	TCGA Agilent
1.76438	GBM	TCGA Agilent
0.832	GBM	TCGA Agilent
0.534125	GBM	TCGA Agilent
0.086875	GBM	TCGA Agilent
1.73237	GBM	TCGA Agilent
2.65413	GBM	TCGA Agilent
0.33375	GBM	TCGA Agilent
3.06937	GBM	TCGA Agilent
1.94975	GBM	TCGA Agilent
1.62338	GBM	TCGA Agilent
1.72525	GBM	TCGA Agilent
1.13563	GBM	TCGA Agilent
0.639125	GBM	TCGA Agilent
2.35688	GBM	TCGA Agilent
1.88338	GBM	TCGA Agilent
1.777	GBM	TCGA Agilent
0.482	GBM	TCGA Agilent
0.435875	GBM	TCGA Agilent
0.731625	GBM	TCGA Agilent
2.44488	GBM	TCGA Agilent
2.73125	GBM	TCGA Agilent
2.52225	GBM	TCGA Agilent
2.283	GBM	TCGA Agilent
0.08575	GBM	TCGA Agilent
1.7205	GBM	TCGA Agilent
0.612625	GBM	TCGA Agilent
1.49812	GBM	TCGA Agilent
1.98838	GBM	TCGA Agilent
1.83337	GBM	TCGA Agilent
1.46388	GBM	TCGA Agilent
0.930625	GBM	TCGA Agilent
1.549	GBM	TCGA Agilent
0.99425	GBM	TCGA Agilent
2.02562	GBM	TCGA Agilent
3.81513	GBM	TCGA Agilent
0.984	GBM	TCGA Agilent
1.52212	GBM	TCGA Agilent
1.29487	GBM	TCGA Agilent
1.958	GBM	TCGA Agilent
0.935125	GBM	TCGA Agilent
3.27062	GBM	TCGA Agilent
1.27175	GBM	TCGA Agilent
2.72363	GBM	TCGA Agilent
1.256	GBM	TCGA Agilent
3.27513	GBM	TCGA Agilent
2.8145	GBM	TCGA Agilent
1.87763	GBM	TCGA Agilent
3.47675	GBM	TCGA Agilent
1.73687	GBM	TCGA Agilent
0.68225	GBM	TCGA Agilent
1.08225	GBM	TCGA Agilent
1.59062	GBM	TCGA Agilent
1.66987	GBM	TCGA Agilent
2.22713	GBM	TCGA Agilent
1.982	GBM	TCGA Agilent
1.8325	GBM	TCGA Agilent
2.01825	GBM	TCGA Agilent
1.24212	GBM	TCGA Agilent
1.25863	GBM	TCGA Agilent
1.71025	GBM	TCGA Agilent
-0.091	GBM	TCGA Agilent
-0.000375	GBM	TCGA Agilent
1.12013	GBM	TCGA Agilent
0.574875	GBM	TCGA Agilent
0.626625	GBM	TCGA Agilent
0.9325	GBM	TCGA Agilent
0.93975	GBM	TCGA Agilent
0.596375	GBM	TCGA Agilent
2.3165	GBM	TCGA Agilent
2.33812	GBM	TCGA Agilent
0.683875	GBM	TCGA Agilent
1.22887	GBM	TCGA Agilent
2.9065	GBM	TCGA Agilent
2.00013	GBM	TCGA Agilent
1.50513	GBM	TCGA Agilent
0.89925	GBM	TCGA Agilent
0.576625	GBM	TCGA Agilent
0.73525	GBM	TCGA Agilent
2.18863	GBM	TCGA Agilent
0.091375	GBM	TCGA Agilent
1.47138	GBM	TCGA Agilent
0.203875	GBM	TCGA Agilent
1.332	GBM	TCGA Agilent
1.14037	GBM	TCGA Agilent
2.73612	GBM	TCGA Agilent
1.712	GBM	TCGA Agilent
1.88387	GBM	TCGA Agilent
3.109	GBM	TCGA Agilent
1.3345	GBM	TCGA Agilent
2.32687	GBM	TCGA Agilent
2.8985	GBM	TCGA Agilent
1.01925	GBM	TCGA Agilent
1.96687	GBM	TCGA Agilent
0.3265	GBM	TCGA Agilent
2.03463	GBM	TCGA Agilent
0.60575	GBM	TCGA Agilent
1.44825	GBM	TCGA Agilent
1.9905	GBM	TCGA Agilent
1.83137	GBM	TCGA Agilent
2.018	GBM	TCGA Agilent
1.52887	GBM	TCGA Agilent
1.14362	GBM	TCGA Agilent
0.782375	GBM	TCGA Agilent
1.93275	GBM	TCGA Agilent
1.61538	GBM	TCGA Agilent
2.67912	GBM	TCGA Agilent
1.71825	GBM	TCGA Agilent
0.6525	GBM	TCGA Agilent
2.66312	GBM	TCGA Agilent
2.71575	GBM	TCGA Agilent
1.96287	GBM	TCGA Agilent
1.38187	GBM	TCGA Agilent
1.647	GBM	TCGA Agilent
1.18687	GBM	TCGA Agilent
0.970875	GBM	TCGA Agilent
1.07987	GBM	TCGA Agilent
1.926	GBM	TCGA Agilent
2.49162	GBM	TCGA Agilent
0.628875	GBM	TCGA Agilent
2.321	GBM	TCGA Agilent
2.03563	GBM	TCGA Agilent
1.90375	GBM	TCGA Agilent
1.257	GBM	TCGA Agilent
1.39437	GBM	TCGA Agilent
2.39225	GBM	TCGA Agilent
0.808625	GBM	TCGA Agilent
0.724625	GBM	TCGA Agilent
1.20112	GBM	TCGA Agilent
0.92925	GBM	TCGA Agilent
0.9375	GBM	TCGA Agilent
1.7595	GBM	TCGA Agilent
1.38138	GBM	TCGA Agilent
0.811875	GBM	TCGA Agilent
2.63813	GBM	TCGA Agilent
1.38738	GBM	TCGA Agilent
1.43225	GBM	TCGA Agilent
1.33825	GBM	TCGA Agilent
1.01713	GBM	TCGA Agilent
0.706375	GBM	TCGA Agilent
2.40713	GBM	TCGA Agilent
0.831125	GBM	TCGA Agilent
1.7045	GBM	TCGA Agilent
2.65462	GBM	TCGA Agilent
1.01937	GBM	TCGA Agilent
0.548625	GBM	TCGA Agilent
-0.142375	GBM	TCGA Agilent
3.904	GBM	TCGA Agilent
2.51938	GBM	TCGA Agilent
2.53412	GBM	TCGA Agilent
0.25525	GBM	TCGA Agilent
1.28625	GBM	TCGA Agilent
1.72863	GBM	TCGA Agilent
1.17938	GBM	TCGA Agilent
2.21163	GBM	TCGA Agilent
1.00362	GBM	TCGA Agilent
0.991625	GBM	TCGA Agilent
2.13463	GBM	TCGA Agilent
3.15813	GBM	TCGA Agilent
2.38475	GBM	TCGA Agilent
2.0245	GBM	TCGA Agilent
1.58163	GBM	TCGA Agilent
0.520875	GBM	TCGA Agilent
1.0285	GBM	TCGA Agilent
1.32638	GBM	TCGA Agilent
1.56963	GBM	TCGA Agilent
2.99425	GBM	TCGA Agilent
1.31862	GBM	TCGA Agilent
-1.00875	GBM	TCGA Agilent
1.11625	GBM	TCGA Agilent
0.917375	GBM	TCGA Agilent
1.72437	GBM	TCGA Agilent
1.49287	GBM	TCGA Agilent
1.48863	GBM	TCGA Agilent
0.96525	GBM	TCGA Agilent
2.1975	GBM	TCGA Agilent
2.46862	GBM	TCGA Agilent
1.59137	GBM	TCGA Agilent
1.22637	GBM	TCGA Agilent
1.16863	GBM	TCGA Agilent
0.256875	GBM	TCGA Agilent
1.48037	GBM	TCGA Agilent
1.31838	GBM	TCGA Agilent
2.067	GBM	TCGA Agilent
1.2525	GBM	TCGA Agilent
0.831125	GBM	TCGA Agilent
0.559375	GBM	TCGA Agilent
1.52913	GBM	TCGA Agilent
1.25775	GBM	TCGA Agilent
2.07662	GBM	TCGA Agilent
3.38025	GBM	TCGA Agilent
1.698	GBM	TCGA Agilent
1.59025	GBM	TCGA Agilent
0.419375	GBM	TCGA Agilent
2.09275	GBM	TCGA Agilent
0.669125	GBM	TCGA Agilent
2.81275	GBM	TCGA Agilent
3.06212	GBM	TCGA Agilent
-0.21575	GBM	TCGA Agilent
0.267625	GBM	TCGA Agilent
0.84775	GBM	TCGA Agilent
1.18613	GBM	TCGA Agilent
1.01313	GBM	TCGA Agilent
0.683	GBM	TCGA Agilent
1.33038	GBM	TCGA Agilent
2.57213	GBM	TCGA Agilent
2.52363	GBM	TCGA Agilent
2.22975	GBM	TCGA Agilent
2.41038	GBM	TCGA Agilent
2.7335	GBM	TCGA Agilent
2.02275	GBM	TCGA Agilent
1.44575	GBM	TCGA Agilent
2.06988	GBM	TCGA Agilent
0.627875	GBM	TCGA Agilent
2.03987	GBM	TCGA Agilent
0.961875	GBM	TCGA Agilent
0.710125	GBM	TCGA Agilent
1.5955	GBM	TCGA Agilent
1.09125	GBM	TCGA Agilent
2.60213	GBM	TCGA Agilent
0.256375	GBM	TCGA Agilent
2.61788	GBM	TCGA Agilent
1.71525	GBM	TCGA Agilent
2.30225	GBM	TCGA Agilent
0.552875	GBM	TCGA Agilent
3.05888	GBM	TCGA Agilent
0.6195	GBM	TCGA Agilent
-0.26625	GBM	TCGA Agilent
1.18863	GBM	TCGA Agilent
2.47412	GBM	TCGA Agilent
1.112	GBM	TCGA Agilent
2.60688	GBM	TCGA Agilent
0.962625	GBM	TCGA Agilent
0.7035	GBM	TCGA Agilent
1.37325	GBM	TCGA Agilent
2.21125	GBM	TCGA Agilent
1.0635	GBM	TCGA Agilent
0.628	GBM	TCGA Agilent
2.75462	GBM	TCGA Agilent
1.34563	GBM	TCGA Agilent
1.05937	GBM	TCGA Agilent
1.96487	GBM	TCGA Agilent
2.0285	GBM	TCGA Agilent
2.4455	GBM	TCGA Agilent
2.54175	GBM	TCGA Agilent
1.22687	GBM	TCGA Agilent
2.47613	GBM	TCGA Agilent
1.58975	GBM	TCGA Agilent
2.32575	GBM	TCGA Agilent
0.2215	GBM	TCGA Agilent
1.53675	GBM	TCGA Agilent
1.0785	GBM	TCGA Agilent
3.06413	GBM	TCGA Agilent
-0.156125	GBM	TCGA Agilent
2.68962	GBM	TCGA Agilent
0.537875	GBM	TCGA Agilent
2.95337	GBM	TCGA Agilent
1.95263	GBM	TCGA Agilent
2.42925	GBM	TCGA Agilent
1.12187	GBM	TCGA Agilent
1.50513	GBM	TCGA Agilent
0.871625	GBM	TCGA Agilent
1.8355	GBM	TCGA Agilent
3.47187	GBM	TCGA Agilent
1.921	GBM	TCGA Agilent
1.85125	GBM	TCGA Agilent
1.7555	GBM	TCGA Agilent
2.91075	GBM	TCGA Agilent
-0.78525	GBM	TCGA Agilent
0.44825	GBM	TCGA Agilent
0.53175	GBM	TCGA Agilent
2.61575	GBM	TCGA Agilent
1.32563	GBM	TCGA Agilent
3.15112	GBM	TCGA Agilent
0.279875	GBM	TCGA Agilent
2.23075	GBM	TCGA Agilent
3.22775	GBM	TCGA Agilent
0.0255	GBM	TCGA Agilent
1.35112	GBM	TCGA Agilent
2.80138	GBM	TCGA Agilent
1.28913	GBM	TCGA Agilent
1.7115	GBM	TCGA Agilent
1.00125	GBM	TCGA Agilent
1.52	GBM	TCGA Agilent
2.785	GBM	TCGA Agilent
1.7485	GBM	TCGA Agilent
1.75513	GBM	TCGA Agilent
2.43875	GBM	TCGA Agilent
3.08712	GBM	TCGA Agilent
-0.54525	GBM	TCGA Agilent
3.3495	GBM	TCGA Agilent
1.007	GBM	TCGA Agilent
1.17312	GBM	TCGA Agilent
0.35925	GBM	TCGA Agilent
1.6385	GBM	TCGA Agilent
-0.029875	GBM	TCGA Agilent
1.7875	GBM	TCGA Agilent
3.3465	GBM	TCGA Agilent
1.921	GBM	TCGA Agilent
2.33363	GBM	TCGA Agilent
2.66262	GBM	TCGA Agilent
1.70263	GBM	TCGA Agilent
2.82325	GBM	TCGA Agilent
1.11512	GBM	TCGA Agilent
1.32475	GBM	TCGA Agilent
2.23188	GBM	TCGA Agilent
2.3965	GBM	TCGA Agilent
1.51937	GBM	TCGA Agilent
2.30337	GBM	TCGA Agilent
1.49925	GBM	TCGA Agilent
3.127	GBM	TCGA Agilent
1.16637	GBM	TCGA Agilent
3.38963	GBM	TCGA Agilent
2.77237	GBM	TCGA Agilent
1.296	GBM	TCGA Agilent
1.069	GBM	TCGA Agilent
1.40225	GBM	TCGA Agilent
1.72263	GBM	TCGA Agilent
0.04625	GBM	TCGA Agilent
2.70175	GBM	TCGA Agilent
0.778625	GBM	TCGA Agilent
3.00963	GBM	TCGA Agilent
0.468375	GBM	TCGA Agilent
1.6085	GBM	TCGA Agilent
1.34575	GBM	TCGA Agilent
2.562	GBM	TCGA Agilent
0.922125	GBM	TCGA Agilent
2.01762	GBM	TCGA Agilent
3.56062	GBM	TCGA Agilent
0.4015	GBM	TCGA Agilent
1.418	GBM	TCGA Agilent
1.55812	GBM	TCGA Agilent
0.586125	GBM	TCGA Agilent
1.8	GBM	TCGA Agilent
2.15987	GBM	TCGA Agilent
1.66712	GBM	TCGA Agilent
1.73188	GBM	TCGA Agilent
8.31125	Control	TCGA Rnaseq
8.39346	Control	TCGA Rnaseq
8.73519	Control	TCGA Rnaseq
9.23439	Control	TCGA Rnaseq
8.5952	GBM	TCGA Rnaseq
8.88646	GBM	TCGA Rnaseq
8.99261	GBM	TCGA Rnaseq
9.29826	GBM	TCGA Rnaseq
9.30965	GBM	TCGA Rnaseq
9.39176	GBM	TCGA Rnaseq
9.4513	GBM	TCGA Rnaseq
9.48224	GBM	TCGA Rnaseq
9.56575	GBM	TCGA Rnaseq
9.59977	GBM	TCGA Rnaseq
9.6029	GBM	TCGA Rnaseq
9.69051	GBM	TCGA Rnaseq
9.69708	GBM	TCGA Rnaseq
9.72574	GBM	TCGA Rnaseq
9.76402	GBM	TCGA Rnaseq
9.77179	GBM	TCGA Rnaseq
9.78058	GBM	TCGA Rnaseq
9.78906	GBM	TCGA Rnaseq
9.82282	GBM	TCGA Rnaseq
9.83348	GBM	TCGA Rnaseq
9.87625	GBM	TCGA Rnaseq
9.89162	GBM	TCGA Rnaseq
9.93068	GBM	TCGA Rnaseq
9.97805	GBM	TCGA Rnaseq
9.98195	GBM	TCGA Rnaseq
9.99369	GBM	TCGA Rnaseq
10.0344	GBM	TCGA Rnaseq
10.0867	GBM	TCGA Rnaseq
10.1331	GBM	TCGA Rnaseq
10.1438	GBM	TCGA Rnaseq
10.1588	GBM	TCGA Rnaseq
10.1742	GBM	TCGA Rnaseq
10.2157	GBM	TCGA Rnaseq
10.2205	GBM	TCGA Rnaseq
10.2218	GBM	TCGA Rnaseq
10.2337	GBM	TCGA Rnaseq
10.3024	GBM	TCGA Rnaseq
10.3498	GBM	TCGA Rnaseq
10.3514	GBM	TCGA Rnaseq
10.3656	GBM	TCGA Rnaseq
10.3963	GBM	TCGA Rnaseq
10.3971	GBM	TCGA Rnaseq
10.4057	GBM	TCGA Rnaseq
10.4622	GBM	TCGA Rnaseq
10.4741	GBM	TCGA Rnaseq
10.4748	GBM	TCGA Rnaseq
10.4803	GBM	TCGA Rnaseq
10.5053	GBM	TCGA Rnaseq
10.5279	GBM	TCGA Rnaseq
10.5366	GBM	TCGA Rnaseq
10.5522	GBM	TCGA Rnaseq
10.5903	GBM	TCGA Rnaseq
10.5922	GBM	TCGA Rnaseq
10.5983	GBM	TCGA Rnaseq
10.6	GBM	TCGA Rnaseq
10.6101	GBM	TCGA Rnaseq
10.6193	GBM	TCGA Rnaseq
10.649	GBM	TCGA Rnaseq
10.6639	GBM	TCGA Rnaseq
10.715	GBM	TCGA Rnaseq
10.7463	GBM	TCGA Rnaseq
10.7555	GBM	TCGA Rnaseq
10.7655	GBM	TCGA Rnaseq
10.7782	GBM	TCGA Rnaseq
10.7899	GBM	TCGA Rnaseq
10.7909	GBM	TCGA Rnaseq
10.7967	GBM	TCGA Rnaseq
10.8213	GBM	TCGA Rnaseq
10.8727	GBM	TCGA Rnaseq
10.873	GBM	TCGA Rnaseq
10.8759	GBM	TCGA Rnaseq
10.8856	GBM	TCGA Rnaseq
10.8937	GBM	TCGA Rnaseq
10.9009	GBM	TCGA Rnaseq
10.9201	GBM	TCGA Rnaseq
10.9369	GBM	TCGA Rnaseq
10.938	GBM	TCGA Rnaseq
10.9631	GBM	TCGA Rnaseq
10.9697	GBM	TCGA Rnaseq
10.9917	GBM	TCGA Rnaseq
10.9925	GBM	TCGA Rnaseq
11.0263	GBM	TCGA Rnaseq
11.0624	GBM	TCGA Rnaseq
11.1047	GBM	TCGA Rnaseq
11.1272	GBM	TCGA Rnaseq
11.1314	GBM	TCGA Rnaseq
11.1344	GBM	TCGA Rnaseq
11.1719	GBM	TCGA Rnaseq
11.173	GBM	TCGA Rnaseq
11.1805	GBM	TCGA Rnaseq
11.189	GBM	TCGA Rnaseq
11.203	GBM	TCGA Rnaseq
11.2066	GBM	TCGA Rnaseq
11.2183	GBM	TCGA Rnaseq
11.2656	GBM	TCGA Rnaseq
11.2797	GBM	TCGA Rnaseq
11.3254	GBM	TCGA Rnaseq
11.361	GBM	TCGA Rnaseq
11.3632	GBM	TCGA Rnaseq
11.3816	GBM	TCGA Rnaseq
11.3832	GBM	TCGA Rnaseq
11.3883	GBM	TCGA Rnaseq
11.3951	GBM	TCGA Rnaseq
11.414	GBM	TCGA Rnaseq
11.4195	GBM	TCGA Rnaseq
11.437	GBM	TCGA Rnaseq
11.4476	GBM	TCGA Rnaseq
11.4499	GBM	TCGA Rnaseq
11.4665	GBM	TCGA Rnaseq
11.4686	GBM	TCGA Rnaseq
11.4793	GBM	TCGA Rnaseq
11.4894	GBM	TCGA Rnaseq
11.5348	GBM	TCGA Rnaseq
11.5442	GBM	TCGA Rnaseq
11.5526	GBM	TCGA Rnaseq
11.5925	GBM	TCGA Rnaseq
11.5945	GBM	TCGA Rnaseq
11.6335	GBM	TCGA Rnaseq
11.6398	GBM	TCGA Rnaseq
11.663	GBM	TCGA Rnaseq
11.6886	GBM	TCGA Rnaseq
11.7086	GBM	TCGA Rnaseq
11.7293	GBM	TCGA Rnaseq
11.7387	GBM	TCGA Rnaseq
11.773	GBM	TCGA Rnaseq
11.7876	GBM	TCGA Rnaseq
11.7906	GBM	TCGA Rnaseq
11.8204	GBM	TCGA Rnaseq
11.9183	GBM	TCGA Rnaseq
11.9226	GBM	TCGA Rnaseq
11.9237	GBM	TCGA Rnaseq
11.9776	GBM	TCGA Rnaseq
11.9958	GBM	TCGA Rnaseq
12.0203	GBM	TCGA Rnaseq
12.0247	GBM	TCGA Rnaseq
12.1292	GBM	TCGA Rnaseq
12.1314	GBM	TCGA Rnaseq
12.1362	GBM	TCGA Rnaseq
12.1601	GBM	TCGA Rnaseq
12.1692	GBM	TCGA Rnaseq
12.1885	GBM	TCGA Rnaseq
12.2125	GBM	TCGA Rnaseq
12.2403	GBM	TCGA Rnaseq
12.3272	GBM	TCGA Rnaseq
12.3922	GBM	TCGA Rnaseq
12.3931	GBM	TCGA Rnaseq
12.3988	GBM	TCGA Rnaseq
12.4585	GBM	TCGA Rnaseq
12.5446	GBM	TCGA Rnaseq
12.6552	GBM	TCGA Rnaseq
12.7176	GBM	TCGA Rnaseq
12.7178	GBM	TCGA Rnaseq
12.8236	GBM	TCGA Rnaseq
12.8872	GBM	TCGA Rnaseq
13.2528	GBM	TCGA Rnaseq
13.2553	GBM	TCGA Rnaseq
