# Supplementary material for: Differentiated glioma cell-derived fibromodulin activates integrin-dependent Notch signaling in endothelial cells to promote tumor angiogenesis and growth
Source: eLife journal article supplement (doi:10.7554/elife.78972), 2022-06-01
Supplement: fig4-figsupp7-data1 [file RAW VALUES FOR SURVIVAL PLOTS BY METHYLATION.xlsx]

## Sheet: Sheet1
Dataset	status	time	cg03764585(1stExon;5'UTR)	cg04704856(1stExon;5'UTR)
GSE48461	1	2.87	0.75262	0.83244
GSE48461	1	0.74	0.57942	0.60324
GSE48461	1	0.46	0.45462	0.65775
GSE48461	0	11.51	0.86558	0.91857
GSE48461	0	11.34	0.75649	0.8497
GSE48461	1	3.61	0.46324	0.83391
GSE48461	0	12.37	0.7868	0.8764
GSE48461	0	11.03	0.84254	0.87701
GSE48461	0	9.99	0.80501	0.90139
GSE48461	1	0.68	0.27585	0.38554
GSE48461	0	10.63	0.71065	0.87984
GSE48461	0	10.25	0.63602	0.88029
GSE48461	1	0.8	0.33102	0.40422
GSE48461	1	1.5	0.7299	0.84673
GSE48461	1	1.59	0.59239	0.77327
GSE48461	0	11.95	0.50728	0.60829
GSE48461	1	9.53	0.7254	0.85575
GSE48461	1	0.98	0.41687	0.57394
GSE48461	1	10.08	0.46374	0.6616
GSE48461	0	13.28	0.67837	0.85155
GSE48461	1	9.32	0.7333	0.88316
GSE48461	1	8.58	0.81863	0.89191
GSE48461	1	3.78	0.68053	0.87175
GSE48461	1	4.16	0.45428	0.60566
GSE48461	1	2.55	0.65907	0.85176
GSE48461	0	11.55	0.61115	0.86521
GSE48461	0	13.52	0.55918	0.87282
GSE48461	1	1.47	0.4652	0.68803
GSE48461	1	1.75	0.70683	0.87995
GSE48461	1	3.07	0.67064	0.83148
GSE48461	1	1.41	0.65938	0.82771
GSE48461	0	14.12	0.84051	0.82255
GSE48461	1	9.22	0.63909	0.84737
GSE48461	0	12.26	0.60682	0.78884
GSE48461	0	12.16	0.21288	0.63869
GSE48461	1	5.91	0.77961	0.88041
GSE48461	1	0.78	0.28076	0.41676
GSE48461	1	6.28	0.89451	0.91198
GSE48461	1	2.8	0.17661	0.30639
GSE48461	1	1.48	0.3027	0.31815
GSE48461	1	2.02	0.404	0.4512
GSE48461	1	1.5	0.33374	0.57535
GSE48461	1	0.32	0.59504	0.80357
GSE48461	1	0.57	0.22995	0.47502
GSE48461	1	1.72	0.49043	0.81969
GSE48461	1	2.37	0.66994	0.78472
GSE48461	1	5.61	0.36585	0.58097
GSE48461	1	3.5	0.80337	0.88179
GSE48461	1	0.97	0.43555	0.42712
GSE48461	1	7.06	0.73918	0.81281
GSE48461	1	6.65	0.73888	0.79299
GSE48461	1	0.72	0.67301	0.74775
GSE48461	1	1.06	0.34299	0.39698
GSE48461	1	0.66	0.33825	0.35666
GSE48461	1	2.89	0.75801	0.75934
GSE48461	0	11.19	0.69551	0.79839
GSE48461	1	0.43	0.46326	0.74062
GSE48461	1	9.51	0.16676	0.72046
GSE48461	1	3.82	0.86626	0.84929
TCGA_450k	1	32.5	0.3387	0.4403
TCGA_450k	1	12.5	0.2582	0.3072
TCGA_450k	1	17.4333	0.2242	0.3051
TCGA_450k	0	8.93333	0.1483	0.2401
TCGA_450k	1	12.2667	0.1432	0.2286
TCGA_450k	1	5.5	0.5144	0.5398
TCGA_450k	1	11.9	0.0885	0.1964
TCGA_450k	1	4.03333	0.4693	0.5375
TCGA_450k	1	3.8	0.3538	0.4517
TCGA_450k	1	1.2	0.4432	0.4791
TCGA_450k	1	2.93333	0.4129	0.4838
TCGA_450k	1	32.5	0.259	0.3328
TCGA_450k	1	17.3	0.1434	0.2225
TCGA_450k	1	1.9	0.2188	0.2866
TCGA_450k	0	0	0.4129	0.4205
TCGA_450k	1	12.5	0.2138	0.2884
TCGA_450k	1	21.2667	0.1432	0.2556
TCGA_450k	0	36.7	0.2173	0.3094
TCGA_450k	1	22.2	0.3605	0.432
TCGA_450k	0	4.4	0.1918	0.3006
TCGA_450k	1	2.73333	0.2992	0.3862
TCGA_450k	0	4.63333	0.2006	0.2918
TCGA_450k	0	26.6667	0.5323	0.5897
TCGA_450k	1	8.46667	0.2457	0.3019
TCGA_450k	1	12.1333	0.2337	0.3034
TCGA_450k	0	59.6	0.4135	0.4706
TCGA_450k	1	5.1	0.2601	0.3603
TCGA_450k			0.7126	0.7933
TCGA_450k	1	1.5	0.6507	0.6871
TCGA_450k	1	34.9333	0.1774	0.3202
TCGA_450k	0	5.03333	0.7753	0.8075
TCGA_450k	1	15.3333	0.2033	0.264
TCGA_450k	1	3.5	0.3927	0.4558
TCGA_450k	1	1.8	0.2068	0.2523
TCGA_450k	1	4.9	0.4763	0.534
TCGA_450k	0	27.1667	0.3286	0.2864
TCGA_450k	0	7.6	0.3438	0.429
TCGA_450k	1	13.8	0.0845	0.0959
TCGA_450k	1	19.1667	0.135	0.2083
TCGA_450k	0	28.9333	0.382	0.6229
TCGA_450k	0	13.0333	0.1649	0.2264
TCGA_450k	1	6.36667	0.4603	0.4738
TCGA_450k	1	5.3	0.2035	0.2512
TCGA_450k	1	4.8	0.3478	0.406
TCGA_450k	1	14.2667	0.5305	0.5499
TCGA_450k	1	4.7	0.2713	0.3091
TCGA_450k	1	12.6333	0.3637	0.4673
TCGA_450k	0	11.9333	0.3182	0.3944
TCGA_450k	1	18.9	0.2743	0.3327
TCGA_450k	1	3.8	0.2041	0.2754
TCGA_450k	1	3.6	0.3699	0.4563
TCGA_450k	0	8.03333	0.1671	0.2212
TCGA_450k	1	22.8	0.4426	0.658
TCGA_450k	1	8.46667	0.0893	0.1692
TCGA_450k	1	0.8	0.4462	0.5765
TCGA_450k	1	16.1667	0.1279	0.2105
TCGA_450k	0	4.83333	0.4801	0.687
TCGA_450k	1	16.9333	0.1752	0.283
TCGA_450k	0	17.9667	0.1178	0.1794
TCGA_450k	0	8.43333	0.2489	0.3026
TCGA_450k	1	5.46667	0.3222	0.4376
TCGA_450k	1	6.73333	0.222	0.2784
TCGA_450k	0	4.83333	0.5271	0.483
TCGA_450k	1	7.46667	0.1583	0.2653
TCGA_450k			0.3981	0.4971
TCGA_450k			0.4142	0.4301
TCGA_450k	0	1.56667	0.0985	0.1325
TCGA_450k	1	17.0333	0.2662	0.4127
TCGA_450k	1	15.5333	0.6188	0.6523
TCGA_450k	1	23.9	0.3178	0.3797
TCGA_450k	1	24.2333	0.3982	0.4978
TCGA_450k	1	15.1667	0.5608	0.5223
TCGA_450k	0	8.33333	0.3024	0.4491
TCGA_450k	1	8.13333	0.518	0.5931
TCGA_450k	0	21.2	0.2778	0.3527
TCGA_450k	0	31.7667	0.6105	0.7191
TCGA_450k	1	3.5	0.6166	0.6988
TCGA_450k	0	6.23333	0.1791	0.2052
TCGA_450k	1	15.3333	0.2162	0.3352
TCGA_450k	1	3.33333	0.2687	0.3098
TCGA_450k	1	4.7	0.152	0.2466
TCGA_450k	1	5.5	0.5454	0.7346
TCGA_450k	1	0.966667	0.3572	0.463
TCGA_450k	1	19.7667	0.1909	0.8932
TCGA_450k	1	2.6	0.3018	0.3
TCGA_450k	1	6	0.0368	0.0865
TCGA_450k	0	14.5333	0.2442	0.342
TCGA_450k	1	122.233	0.1629	0.2015
TCGA_450k	0	18.0333	0.3769	0.453
TCGA_450k	0	7.9	0.5322	0.7015
TCGA_450k	1	4.6	0.2383	0.2957
TCGA_450k	1	22.2	0.2825	0.3247
TCGA_450k	1	3.16667	0.1324	0.2468
TCGA_450k	1	20.8333	0.3537	0.4645
TCGA_450k	1	1.4	0.1201	0.2102
TCGA_450k	1	15.3333	0.3354	0.4133
TCGA_450k	1	1.63333	0.1136	0.2529
TCGA_450k	0	2.36667	0.4284	0.5496
TCGA_450k	1	11.5333	0.1618	0.2416
TCGA_450k	1	19.5	0.1875	0.2429
TCGA_450k	0	31.7	0.2475	0.3264
TCGA_450k	1	7.5	0.2874	0.3503
TCGA_450k	1	20.1	0.3372	0.4511
TCGA_450k	1	7.5	0.2333	0.2959
TCGA_450k	0	4.13333	0.1468	0.1958
TCGA_450k	1	4.86667	0.1586	0.1881
TCGA_450k	1	12	0.222	0.3065
TCGA_450k	1	9	0.235	0.3224
TCGA_450k	1	12	0.2206	0.2893
TCGA_450k	0	19.6	0.1933	0.2043
TCGA_450k	0	9.1	0.2491	0.2845
TCGA_450k	1	10.5667	0.2206	0.3208
TCGA_450k	1	48.2667	0.2457	0.3914
TCGA_450k	1	2.56667	0.2966	0.4499
TCGA_450k	0	7.13333	0.2823	0.3624
TCGA_450k	1	18.1333	0.3855	0.5115
TCGA_450k	1	37.3667	0.1752	0.2587
TCGA_450k	1	13.3	0.3752	0.4594
TCGA_450k	1	15.1333	0.5631	0.6204
TCGA_450k	1	23.7667	0.3607	0.4379
TCGA_450k	0	23	0.2608	0.3145
TCGA_450k	1	2.06667	0.1602	0.3036
TCGA_450k	0	25.9333	0.2827	0.3571
TCGA_450k	1	10.5667	0.2299	0.3035
TCGA_450k	0	17.9667	0.6828	0.7104
TCGA_450k	1	11.1667	0.168	0.2766
TCGA_450k	0	6.8	0.0629	0.2012
TCGA_450k	1	48.6	0.1612	0.2481
TCGA_450k	1	14.8	0.3264	0.3495
TCGA_450k	1	15.1333	0.4771	0.5184
TCGA_450k	1	19.2333	0.1482	0.2122
TCGA_450k	0	5.16667	0.4464	0.6957
TCGA_450k	0	9.53333	0.1388	0.1739
TCGA_450k	1	3.26667	0.2334	0.2955
TCGA_450k	0	7.13333	0.327	0.3904
TCGA_450k	1	5.23333	0.1384	0.2078
TCGA_450k	1	9.3	0.1027	0.1731
TCGA_450k	0	13.8333	0.1626	0.2851
TCGA_450k	1	48.2667	0.3172	0.4451
TCGA_450k	0	1.46667	0.1714	0.2004
TCGA_450k	1	17.8333	0.2516	0.3396
TCGA_450k	0	14.7333	0.0683	0.129
TCGA_450k	1	2.76667	0.2365	0.3261
TCGA_450k	1	3.7	0.1571	0.2556
TCGA_450k	0	1.6	0.1021	0.1522
TCGA_450k	1	11.4333	0.2441	0.3432
TCGA_450k	1	4.6	0.2103	0.2817
TCGA_450k	0	5.56667	0.3516	0.5012
TCGA_450k	1	13.3	0.2552	0.3497
TCGA_450k	1	20.1	0.5689	0.6213
TCGA_450k	1	12.9333	0.0369	0.0888
TCGA_450k	1	3.13333	0.0688	0.1506
TCGA_450k	0	8.66667	0.187	0.2448
TCGA_450k	0	15.0667	0.2034	0.4933
