# Supplementary material for: Differentiated glioma cell-derived fibromodulin activates integrin-dependent Notch signaling in endothelial cells to promote tumor angiogenesis and growth
Source: eLife journal article supplement (doi:10.7554/elife.78972), 2022-06-01
Supplement: fig5-data2 [file ROI VALUES.xlsx]

## Sheet: ROI COUNTS
AGR53-GSC/miRNT + Dox	21	27	33	40	48	55
1	1230000000	2340000000	4230000000	1240000000	9292000000	7475000000
2	857000000	687000000	3230000000	904000000	8903000000	6544000000
3	987000000
4	999600000	2990000000	4412000000	999000000	7829000000
5	1120000000	2110000000	3260000000	799000000	7824000000
6	9670000000	3090000000	4030000000
7	1670000000
8	2320000000
9	1000000000	2870000000	2230000000	9592000000					21	27	33	40	48	55
	2.20596e+09	2.34783e+09	3.56533e+09	2706800000	8462000000	7009500000		AGR53-GSC/miRNT + Dox	2.20596e+09	2.34783e+09	3.56533e+09	2706800000	8462000000	7009500000	0.0212932
	2.83635e+09	9.00093e+08	8.20163e+08	3.8524e+09	7.50803e+08	6.58316e+08			5.83635e+08	6.00093e+08	4.20163e+08	1030000000	7.50803e+08	6.58316e+08
								AGR53-GSC/miRFMOD+ Dox	1.44714e+09	822000000	292450000	6.0094e+08	768925000	781482500
									1.67523e+08	8.62887e+08	6.03909e+08	6.19085e+08	3.08752e+08	7.32241e+08
AGR53-GSC/miRFMOD+ Dox
1	778000000	623000000	480300000	180300008	664700000	754300000
2	518000000	498000000	203500000	203500000	1229000000	1814000000
3	723000000	345000000	266400000	366400000	582700000	413630000
4	795000000	283000000	284500000	584500000	599300000	144000000
5	978000000	623000000	197000000
6	878000000	2560000000	323000000	1670000000
7	543000000
	7.44714e+08	822000000	292450000	6.0094e+08	768925000	781482500
	1.67523e+08	8.62887e+08	1.03909e+08	6.19085e+08	3.08752e+08	7.32241e+08
