# Supplementary material for: Differentiated glioma cell-derived fibromodulin activates integrin-dependent Notch signaling in endothelial cells to promote tumor angiogenesis and growth
Source: eLife journal article supplement (doi:10.7554/elife.78972), 2022-06-01
Supplement: fig5-data3 [file SURVIVAL INFO FOR PANEL D.xlsx]

## Sheet: Sheet1
		DAYS
	AGR53-GSC/MIRNT+DOX	25	1
		28	1
		36	1
		44	1
		52	1
		54	1
		60	1
	AGR53-GSC/MIRFMOD+DOX	40	1
		46	1
		64	1
