# Supplementary material for: Differentiated glioma cell-derived fibromodulin activates integrin-dependent Notch signaling in endothelial cells to promote tumor angiogenesis and growth
Source: eLife journal article supplement (doi:10.7554/elife.78972), 2022-06-01
Supplement: fig6-data2 [file SURVIVAL DATA FOR PANEL B.xlsx]

## Sheet: SURVIVAL DATA
	shNT	Days
		8	1
		11	1
		18	1
		24	1
		29	1
		30	1
	shFMOD	Days
		19	1
		26	1
		29	1
