# Supplementary material for: Differentiated glioma cell-derived fibromodulin activates integrin-dependent Notch signaling in endothelial cells to promote tumor angiogenesis and growth
Source: eLife journal article supplement (doi:10.7554/elife.78972), 2022-06-01
Supplement: fig6-figsupp1-data1 [file roi values for panel b.xlsx]

## Sheet: Sheet1
	shNT	shFMOD
3	1300	1500	100	90
9	2100	1800	60	80
15	2400	1900	200	112
20	2200	1920	200	132
26	3000	1800	300	100
	0.207774
