# Supplementary material for: Differentiated glioma cell-derived fibromodulin activates integrin-dependent Notch signaling in endothelial cells to promote tumor angiogenesis and growth
Source: eLife journal article supplement (doi:10.7554/elife.78972), 2022-06-01
Supplement: fig6-figsupp1-data1 [file survival info for panel c.xlsx]

## Sheet: Sheet1
	shNT	11	1
		15
		18	1
	shF	30	0
