# Supplementary material for: Differentiated glioma cell-derived fibromodulin activates integrin-dependent Notch signaling in endothelial cells to promote tumor angiogenesis and growth
Source: eLife journal article supplement (doi:10.7554/elife.78972), 2022-06-01
Supplement: fig7-data2 [file DATA FOR PANELS B,C,H,I.xlsx]

## Sheet: DATA FR PANLS B,C,H,I
Colocalization coeeficient				STDEV
AGR53-GSC/ mIRNT+Dox	AGR52-GSC/ mIRFMOD+Dox	AGR53-GSC/ mIRNT+Dox	AGR52-GSC/ mIRFMOD+Dox	AGR53-GSC/ mIRNT+Dox	AGR52-GSC/ mIRFMOD+Dox
0.627	0.189	0.53025	0.188525	0.0801476	0.0495365	3.46764e-07
0.542	0.123
0.562	0.223
0.609	0.1962
0.452	0.168
0.398	0.244
0.478	0.246
0.574	0.119
0.785
0.678
0.6712
0.546
0.713
Intensity
AGR53-GSC/ mINT+Dox	AGR53-GSC/ mIRFMOD+Dox	AGR53-GSC/ mINT+Dox	AGR53-GSC/ mIRFMOD+Dox	AGR53-GSC/ mINT+Dox	AGR53-GSC/ mIRFMOD+Dox
45.19	21.04	55.5586	24.9343	9.45127	4.92281	3.25007e-05
43.45	19.34
57.92	24.56
62.34	21.56
59.12	29.78
69.66	25.34
51.23	32.92
45.6	21.56
62.11
54.67
46.78
56.11
52.12
41.22
56.21
43.2
61.22
Area
AGR53-GSC/ mINT+Dox	AGR53-GSC/ mIRFMOD+Dox	AGR53-GSC/ mINT+Dox	AGR53-GSC/ mIRFMOD+Dox	AGR53-GSC/ mINT+Dox	AGR53-GSC/ mIRFMOD+Dox
15496.8	7705.3	15427.7	6876.8	1536.97	1011.25	0.00019889
17211.9	6245.67
13456.7	7768.98
15545.4	5787.23
16787.8	7656.7
17345.6	6566.78
17556.8	4537.93
17545.6	6967.98
13976.4
16434.5
17578.7
17391
12889
14534
13455
16775
16554
Number of vessels
Section	AGR53-GSC/ mIRFMOD+Dox	AGR53-GSC/ mINT+Dox	AGR53-GSC/ mIRFMOD+Dox	AGR53-GSC/ mINT+Dox	AGR53-GSC/ mIRFMOD+Dox	AGR53-GSC/ mINT+Dox
1	3	1	3.4	0.666667	0.547723	0.5	1.92893e-05
2	3	0
3	4	1
4	4	1
5	3	1
6		0
7		0
8		1
9		1
			Percentage number of vessels
			AGR53-GSC/ mIRFMOD+Dox	AGR53-GSC/ mINT+Dox	AGR53-GSC/ mIRFMOD+Dox	AGR53-GSC/ mINT+Dox
			100	19.6078	16.1095	3.10376
