# Supplementary material for: Differentiated glioma cell-derived fibromodulin activates integrin-dependent Notch signaling in endothelial cells to promote tumor angiogenesis and growth
Source: eLife journal article supplement (doi:10.7554/elife.78972), 2022-06-01
Supplement: fig7-data4 [file DATA FOR PANELS E,F,K,L.xlsx]

## Sheet: DATA FR PANLS E,F,K,L
	MGG8-GSC/ shNT	MGG8-GSC/ shFMOD	MGG8-GSC/ shNT	MGG8-GSC/ shFMOD	MGG8-GSC/ shNT	MGG8-GSC/ shFMOD
	0.527	0.289	0.551375	0.219143	0.0791853	0.0636995	3.17505e-07
	0.642	0.223
	0.462	0.201
	0.509	0.1962
	0.652	0.1888
	0.578	0.124
	0.567	0.312
	0.474
	0.567
	0.675
	0.677
	0.72
	0.63
	0.58
	MGG8-GSC/ shNT	MGG8-GSC/ shFMOD	MGG8-GSC/ shNT	MGG8-GSC/ shFMOD	MGG8-GSC/ shNT	MGG8-GSC/ shFMOD
	18496.8	9505.3	16790.1	7679.78	1957.6	1599.4	0.000103077
	19211.8	5245.7
	19456.7	8768.98
	17545.8	8787.23
	17956.4	5568.8
	19869.3	7543.5
	15668.8	8338.95
	17895.9
	19876.7
	1956.54
	16756.5
	14500
	18373
	15622
	MGG8-GSC/ shNT	MGG8-GSC/ shFMOD	MGG8-GSC/ shNT	MGG8-GSC/ shFMOD
	35.19	16.04	45.5586	20.3343	9.45127	3.65597	0.000197249
	33.45	19.14
	47.92	18.56
	52.34	17.56
	49.12	21.78
	59.66	22.34
	41.23	26.92
	56.7
	44.34
	40.19
	45.13
	34.8
	51.7
	39.7
Number of vessels
Section	MGG8-GSC/ shNT	MGG8-GSC/ shFMOD	MGG8-GSC/ shNT	MGG8-GSC/ shFMOD	MGG8-GSC/ shNT	MGG8-GSC/ shFMOD
1	3	1	3.5	1	0.57735	0.816497	0.00030338
2	4	2
3	3	0
4	4	0
5		1
6		1
7		2
	Percentage number of vessels
	MGG8-GSC/ shNT	MGG8-GSC/ shFMOD	MGG8-GSC/ shNT	MGG8-GSC/ shFMOD
	100	28.5714	16.4957	23.3285
