# Supplementary material for: Differentiated glioma cell-derived fibromodulin activates integrin-dependent Notch signaling in endothelial cells to promote tumor angiogenesis and growth
Source: eLife journal article supplement (doi:10.7554/elife.78972), 2022-06-01
Supplement: fig7-figsupp1-data1 [file values for panel f.xlsx]

## Sheet: PANEL B
CD113	27	GFAP	96
	16		86
	25		91
	22		84
	26		96

## Sheet: PANEL C
CD113	0.25	GFAP	0.71
	0.21		0.75
	0.287		0.83
	0.18		0.77
	0.19		0.78

## Sheet: PANEL E
CD113	23	GFAP	86
	27		88
	35		81
	26		74
	27		86

## Sheet: PANEL F
CD113	0.2	GFAP	0.15
	0.23		0.17
	0.27		0.13
	0.32		0.17
	0.26		0.18
