# Supplementary material for: Differentiated glioma cell-derived fibromodulin activates integrin-dependent Notch signaling in endothelial cells to promote tumor angiogenesis and growth
Source: eLife journal article supplement (doi:10.7554/elife.78972), 2022-06-01
Supplement: fig7-figsupp2-data1 [file B.xlsx]

## Sheet: B
CD113	27	GFAP	66
	19		68
	25		71
	24		74
	26		66

## Sheet: C
CD113	0.12	GFAP	0.61
	0.113		0.71
	0.187		0.63
	0.18		0.67
	0.16		0.78
	0.152		0.68

## Sheet: E
CD113	2	GFAP	76
	29		88
	35		71
	24		74
	26		86

## Sheet: F
CD113	0.2	GFAP	0.15
	0.23		0.17
	0.187		0.13
	0.32		0.17
	0.16		0.18
