# Supplementary material for: Differentiated glioma cell-derived fibromodulin activates integrin-dependent Notch signaling in endothelial cells to promote tumor angiogenesis and growth
Source: eLife journal article supplement (doi:10.7554/elife.78972), 2022-06-01
Supplement: fig7-figsupp3-data1 [file C.xlsx]

## Sheet: Sheet1
CD113	0.17	GFAP	0.0.71
	0.12		0.79
	0.15		0.82
	0.16		0.65
	0.13		0.69
