# Supplementary material for: Differentiated glioma cell-derived fibromodulin activates integrin-dependent Notch signaling in endothelial cells to promote tumor angiogenesis and growth
Source: eLife journal article supplement (doi:10.7554/elife.78972), 2022-06-01
Supplement: fig7-figsupp3-data1 [file E.xlsx]

## Sheet: Sheet1
CD113	7	GFAP	66
	9		68
	5		71
	4		74
	6		66
