# Supplementary material for: Differentiated glioma cell-derived fibromodulin activates integrin-dependent Notch signaling in endothelial cells to promote tumor angiogenesis and growth
Source: eLife journal article supplement (doi:10.7554/elife.78972), 2022-06-01
Supplement: fig7-figsupp3-data1 [file F.xlsx]

## Sheet: Sheet1
CD113	0.12	GFAP	0.017
	0.097		0.29
	0.08		0.22
	0.12		0.25
	0.133		0.29
