# Supplementary material for: Differentiated glioma cell-derived fibromodulin activates integrin-dependent Notch signaling in endothelial cells to promote tumor angiogenesis and growth
Source: eLife. 2022 Jun 1;11:e78972. doi: 10.7554/eLife.78972 (PMC9259034; doi:10.7554/eLife.78972)
Supplement: Figure 6—figure supplement 1—source data 1. [file elife-78972-fig6-figsupp1-data1.zip]

Archive with 11 entries (6 files):
- Figure 6-Figure Supplement 1-Source data/.DS_Store
- Figure 6-Figure Supplement 1-Source data/Figure 6-Figure Supplement 1-Source Data A/
- Figure 6-Figure Supplement 1-Source data/Figure 6-Figure Supplement 1-Source Data A/in vivo images for panel a.pdf
- Figure 6-Figure Supplement 1-Source data/Figure 6-Figure Supplement 1-Source Data B/
- Figure 6-Figure Supplement 1-Source data/Figure 6-Figure Supplement 1-Source Data B/roi values for panel b.xlsx
- Figure 6-Figure Supplement 1-Source data/Figure 6-Figure Supplement 1-Source Data C/
- Figure 6-Figure Supplement 1-Source data/Figure 6-Figure Supplement 1-Source Data C/survival info for panel c.xlsx
- Figure 6-Figure Supplement 1-Source data/Figure 6-Figure Supplement 1-Source Data D/
- Figure 6-Figure Supplement 1-Source data/Figure 6-Figure Supplement 1-Source Data D/hne images for panel d.pdf
- Figure 6-Figure Supplement 1-Source data/Figure 6-Figure Supplement 1-Source Data E/
- Figure 6-Figure Supplement 1-Source data/Figure 6-Figure Supplement 1-Source Data E/confocal images for panel e.pdf
