# Supplementary material for: Differentiated glioma cell-derived fibromodulin activates integrin-dependent Notch signaling in endothelial cells to promote tumor angiogenesis and growth
Source: eLife. 2022 Jun 1;11:e78972. doi: 10.7554/eLife.78972 (PMC9259034; doi:10.7554/eLife.78972)
Supplement: Supplementary file 1. [file elife-78972-supp1.xlsx]

## Sheet: Sig. Diff. abundant Proteins
Supplementary File 1: List of proteins exhibiting significantly different abundance in GSC and DGC secretomes
S. No.	Protein Name	FullName	GSC/DGC Log2 ratio	p-value
1	MTPN	myotrophin [Source:HGNC Symbol;Acc:HGNC:15667]	5.82187	0.00236042
2	MAP2	microtubule associated protein 2 [Source:HGNC Symbol;Acc:HGNC:6839]	5.46495	0.00139207
3	HUWE1	HECT, UBA and WWE domain containing E3 ubiquitin protein ligase 1 [Source:HGNC Symbol;Acc:HGNC:30892]	4.56231	0.0085369
4	HMGCS1	3-hydroxy-3-methylglutaryl-CoA synthase 1 [Source:HGNC Symbol;Acc:HGNC:5007]	4.17526	0.00745453
5	GOLGB1	golgin B1 [Source:HGNC Symbol;Acc:HGNC:4429]	4.01642	0.0416083
6	SLK	STE20 like kinase [Source:HGNC Symbol;Acc:HGNC:11088]	3.84654	0.000425344
7	JPT1	Jupiter microtubule associated homolog 1 [Source:HGNC Symbol;Acc:HGNC:14569]	3.61792	0.048227
8	ACACA	acetyl-CoA carboxylase alpha [Source:HGNC Symbol;Acc:HGNC:84]	3.60016	0.00415499
9	TF	transferrin [Source:HGNC Symbol;Acc:HGNC:11740]	3.43993	0.012513
10	PSME4	proteasome activator subunit 4 [Source:HGNC Symbol;Acc:HGNC:20635]	3.39845	0.0239403
11	CCDC88A	coiled-coil domain containing 88A [Source:HGNC Symbol;Acc:HGNC:25523]	3.31493	0.00772396
12	GGPS1	geranylgeranyl diphosphate synthase 1 [Source:HGNC Symbol;Acc:HGNC:4249]	3.05206	0.036166
13	FDFT1	farnesyl-diphosphate farnesyltransferase 1 [Source:NCBI gene (formerly Entrezgene);Acc:2222]	3.02386	0.0211237
14	USP24	ubiquitin specific peptidase 24 [Source:HGNC Symbol;Acc:HGNC:12623]	3.00383	0.000473849
15	SMC4	structural maintenance of chromosomes 4 [Source:HGNC Symbol;Acc:HGNC:14013]	2.96016	0.0500991
16	EPN2	epsin 2 [Source:HGNC Symbol;Acc:HGNC:18639]	2.95072	0.0180472
17	HMGN5	high mobility group nucleosome binding domain 5 [Source:HGNC Symbol;Acc:HGNC:8013]	2.87788	0.0346434
18	PM20D2	peptidase M20 domain containing 2 [Source:HGNC Symbol;Acc:HGNC:21408]	2.76465	0.0137126
19	STMN1	stathmin 1 [Source:HGNC Symbol;Acc:HGNC:6510]	2.7393	0.0148974
20	PFDN6	prefoldin subunit 6 [Source:HGNC Symbol;Acc:HGNC:4926]	2.61311	0.0453075
21	TBCD	tubulin folding cofactor D [Source:HGNC Symbol;Acc:HGNC:11581]	2.60875	0.0296838
22	EIF2D	eukaryotic translation initiation factor 2D [Source:HGNC Symbol;Acc:HGNC:6583]	2.58252	0.00749445
23	SMYD5	SMYD family member 5 [Source:HGNC Symbol;Acc:HGNC:16258]	2.57266	0.0237854
24	HPX	hemopexin [Source:HGNC Symbol;Acc:HGNC:5171]	2.49692	0.0472988
25	ELP2	elongator acetyltransferase complex subunit 2 [Source:HGNC Symbol;Acc:HGNC:18248]	2.48931	0.000891169
26	TNPO1	transportin 1 [Source:HGNC Symbol;Acc:HGNC:6401]	2.46769	0.000201563
27	SSB	small RNA binding exonuclease protection factor La [Source:HGNC Symbol;Acc:HGNC:11316]	2.43856	0.00987325
28	C1QBP	complement C1q binding protein [Source:HGNC Symbol;Acc:HGNC:1243]	2.42588	0.00984804
29	VIRMA	vir like m6A methyltransferase associated [Source:HGNC Symbol;Acc:HGNC:24500]	2.41118	0.00377233
30	RPL12	ribosomal protein L12 [Source:HGNC Symbol;Acc:HGNC:10302]	2.37851	0.0376765
31	HDGFL3	HDGF like 3 [Source:HGNC Symbol;Acc:HGNC:24937]	2.36162	0.0116885
32	USP9X	ubiquitin specific peptidase 9 X-linked [Source:HGNC Symbol;Acc:HGNC:12632]	2.28886	0.0154394
33	UBE2R2	ubiquitin conjugating enzyme E2 R2 [Source:HGNC Symbol;Acc:HGNC:19907]	2.28858	0.0157903
34	PPP1R2	protein phosphatase 1 regulatory inhibitor subunit 2 [Source:HGNC Symbol;Acc:HGNC:9288]	2.28733	0.043425
35	NAA15	N-alpha-acetyltransferase 15, NatA auxiliary subunit [Source:HGNC Symbol;Acc:HGNC:30782]	2.27266	0.0188612
36	FDPS	farnesyl diphosphate synthase [Source:HGNC Symbol;Acc:HGNC:3631]	2.18331	0.00213732
37	SNRPG	small nuclear ribonucleoprotein polypeptide G [Source:HGNC Symbol;Acc:HGNC:11163]	2.16677	0.0245471
38	GPHN	gephyrin [Source:HGNC Symbol;Acc:HGNC:15465]	2.1518	0.00417946
39	GINS3	GINS complex subunit 3 [Source:HGNC Symbol;Acc:HGNC:25851]	2.14286	2.69594e-05
40	IPO11	importin 11 [Source:HGNC Symbol;Acc:HGNC:20628]	2.09676	0.0142787
41	NRDC	nardilysin convertase [Source:HGNC Symbol;Acc:HGNC:7995]	2.08851	0.011508
42	FIP1L1	factor interacting with PAPOLA and CPSF1 [Source:HGNC Symbol;Acc:HGNC:19124]	2.05743	0.045651
43	IDI1	isopentenyl-diphosphate delta isomerase 1 [Source:HGNC Symbol;Acc:HGNC:5387]	2.02295	0.00727562
44	HSP90AB1	heat shock protein 90 alpha family class B member 1 [Source:HGNC Symbol;Acc:HGNC:5258]	2.0221	0.0123126
45	BIRC6	baculoviral IAP repeat containing 6 [Source:HGNC Symbol;Acc:HGNC:13516]	2.00481	0.00940784
46	NXN	nucleoredoxin [Source:HGNC Symbol;Acc:HGNC:18008]	1.90178	0.00266195
47	KDM1A	lysine demethylase 1A [Source:HGNC Symbol;Acc:HGNC:29079]	1.90069	0.033358
48	FASN	fatty acid synthase [Source:HGNC Symbol;Acc:HGNC:3594]	1.89173	0.00476694
49	XPO4	exportin 4 [Source:HGNC Symbol;Acc:HGNC:17796]	1.86766	0.026711
50	NASP	nuclear autoantigenic sperm protein [Source:HGNC Symbol;Acc:HGNC:7644]	1.85498	0.0088959
51	RPL38	ribosomal protein L38 [Source:HGNC Symbol;Acc:HGNC:10349]	1.8531	0.0329967
52	CAND1	cullin associated and neddylation dissociated 1 [Source:HGNC Symbol;Acc:HGNC:30688]	1.84302	0.0309606
53	HSPH1	heat shock protein family H (Hsp110) member 1 [Source:HGNC Symbol;Acc:HGNC:16969]	1.81283	0.00668544
54	DCTN3	dynactin subunit 3 [Source:HGNC Symbol;Acc:HGNC:2713]	1.7874	0.0323065
55	RPL23	ribosomal protein L23 [Source:HGNC Symbol;Acc:HGNC:10316]	1.77198	0.0347248
56	IPO7	importin 7 [Source:HGNC Symbol;Acc:HGNC:9852]	1.76364	0.02561
57	VAC14	VAC14 component of PIKFYVE complex [Source:HGNC Symbol;Acc:HGNC:25507]	1.73733	0.040723
58	PFAS	phosphoribosylformylglycinamidine synthase [Source:HGNC Symbol;Acc:HGNC:8863]	1.71727	0.00159408
59	ECPAS	Ecm29 proteasome adaptor and scaffold [Source:HGNC Symbol;Acc:HGNC:29020]	1.71064	0.0373663
60	HMGB2	high mobility group box 2 [Source:HGNC Symbol;Acc:HGNC:5000]	1.70647	0.00238188
61	PDAP1	PDGFA associated protein 1 [Source:HGNC Symbol;Acc:HGNC:14634]	1.69236	0.00949445
62	YBX1	Y-box binding protein 1 [Source:HGNC Symbol;Acc:HGNC:8014]	1.6761	0.0151747
63	SETD7	SET domain containing 7, histone lysine methyltransferase [Source:HGNC Symbol;Acc:HGNC:30412]	1.67483	0.0216257
64	HSPA4	heat shock protein family A (Hsp70) member 4 [Source:HGNC Symbol;Acc:HGNC:5237]	1.67474	4.46581e-05
65	PSAT1	phosphoserine aminotransferase 1 [Source:HGNC Symbol;Acc:HGNC:19129]	1.65132	0.00156845
66	PSMB5	proteasome 20S subunit beta 5 [Source:HGNC Symbol;Acc:HGNC:9542]	1.64967	0.0129918
67	XPOT	exportin for tRNA [Source:HGNC Symbol;Acc:HGNC:12826]	1.63752	0.020762
68	ANKFY1	ankyrin repeat and FYVE domain containing 1 [Source:HGNC Symbol;Acc:HGNC:20763]	1.62505	0.0130248
69	UBA2	ubiquitin like modifier activating enzyme 2 [Source:HGNC Symbol;Acc:HGNC:30661]	1.61905	0.046153
70	PPP1R7	protein phosphatase 1 regulatory subunit 7 [Source:HGNC Symbol;Acc:HGNC:9295]	1.60677	0.0139216
71	PPM1E	protein phosphatase, Mg2+/Mn2+ dependent 1E [Source:HGNC Symbol;Acc:HGNC:19322]	1.59069	0.0393786
72	JPT2	Jupiter microtubule associated homolog 2 [Source:HGNC Symbol;Acc:HGNC:14137]	1.57652	0.0454067
73	OSBP	oxysterol binding protein [Source:HGNC Symbol;Acc:HGNC:8503]	1.57503	0.0475335
74	ALDH7A1	aldehyde dehydrogenase 7 family member A1 [Source:HGNC Symbol;Acc:HGNC:877]	1.56623	0.0381303
75	ARL2BP	ADP ribosylation factor like GTPase 2 binding protein [Source:HGNC Symbol;Acc:HGNC:17146]	1.56234	0.0358418
76	SPAG7	sperm associated antigen 7 [Source:HGNC Symbol;Acc:HGNC:11216]	1.5434	0.0417994
77	BCCIP	BRCA2 and CDKN1A interacting protein [Source:HGNC Symbol;Acc:HGNC:978]	1.53729	0.0469591
78	IPO5	importin 5 [Source:HGNC Symbol;Acc:HGNC:6402]	1.51652	0.00410336
79	WDR12	WD repeat domain 12 [Source:HGNC Symbol;Acc:HGNC:14098]	1.48385	0.0399779
80	ST13	ST13 Hsp70 interacting protein [Source:HGNC Symbol;Acc:HGNC:11343]	1.47299	0.0066716
81	PSMA3	proteasome 20S subunit alpha 3 [Source:HGNC Symbol;Acc:HGNC:9532]	1.46049	0.0131565
82	CSE1L	chromosome segregation 1 like [Source:HGNC Symbol;Acc:HGNC:2431]	1.45656	0.00510705
83	PFDN2	prefoldin subunit 2 [Source:HGNC Symbol;Acc:HGNC:8867]	1.44379	0.0095929
84	RANBP1	RAN binding protein 1 [Source:HGNC Symbol;Acc:HGNC:9847]	1.43681	0.0301051
85	RPIA	ribose 5-phosphate isomerase A [Source:HGNC Symbol;Acc:HGNC:10297]	1.39541	0.0489058
86	AARS	alanyl-tRNA synthetase	1.38004	0.018426
87	COPS2	COP9 signalosome subunit 2 [Source:HGNC Symbol;Acc:HGNC:30747]	1.34372	0.0375111
88	ACP1	acid phosphatase 1 [Source:HGNC Symbol;Acc:HGNC:122]	1.3296	0.0486385
89	PSMA2	proteasome 20S subunit alpha 2 [Source:HGNC Symbol;Acc:HGNC:9531]	1.32728	0.0332575
90	MYH10	myosin heavy chain 10 [Source:HGNC Symbol;Acc:HGNC:7568]	1.31809	0.0231063
91	DBI	diazepam binding inhibitor, acyl-CoA binding protein [Source:HGNC Symbol;Acc:HGNC:2690]	1.31239	0.0360703
92	ACLY	ATP citrate lyase [Source:HGNC Symbol;Acc:HGNC:115]	1.28975	0.00919496
93	USP5	ubiquitin specific peptidase 5 [Source:HGNC Symbol;Acc:HGNC:12628]	1.27694	0.017557
94	ACTR1B	actin related protein 1B [Source:HGNC Symbol;Acc:HGNC:168]	1.27215	0.00372366
95	WDR77	WD repeat domain 77 [Source:HGNC Symbol;Acc:HGNC:29652]	1.26651	0.012416
96	GINS4	GINS complex subunit 4 [Source:HGNC Symbol;Acc:HGNC:28226]	1.24595	0.0320597
97	YWHAB	tyrosine 3-monooxygenase/tryptophan 5-monooxygenase activation protein beta [Source:HGNC Symbol;Acc:HGNC:12849]	1.23775	0.038691
98	KNTC1	kinetochore associated 1 [Source:HGNC Symbol;Acc:HGNC:17255]	1.22417	0.0118648
99	GEMIN5	gem nuclear organelle associated protein 5 [Source:HGNC Symbol;Acc:HGNC:20043]	1.22411	0.0013148
100	PRKCSH	protein kinase C substrate 80K-H [Source:HGNC Symbol;Acc:HGNC:9411]	1.21875	0.0221636
101	HDGF	heparin binding growth factor [Source:HGNC Symbol;Acc:HGNC:4856]	1.21839	0.0386643
102	PSMA5	proteasome 20S subunit alpha 5 [Source:HGNC Symbol;Acc:HGNC:9534]	1.21362	0.0242265
103	PSMD5	proteasome 26S subunit, non-ATPase 5 [Source:HGNC Symbol;Acc:HGNC:9563]	1.18272	0.0272596
104	PSMB3	proteasome 20S subunit beta 3 [Source:HGNC Symbol;Acc:HGNC:9540]	1.18106	0.0340675
105	APEH	acylaminoacyl-peptide hydrolase [Source:HGNC Symbol;Acc:HGNC:586]	1.16274	0.00148655
106	MVD	mevalonate diphosphate decarboxylase [Source:HGNC Symbol;Acc:HGNC:7529]	1.16065	0.00126873
107	PSMA1	proteasome 20S subunit alpha 1 [Source:HGNC Symbol;Acc:HGNC:9530]	1.12906	0.00409157
108	IGF2R	insulin like growth factor 2 receptor [Source:HGNC Symbol;Acc:HGNC:5467]	1.12009	0.0255452
109	TARS	threonyl-tRNA synthetase	1.10739	0.0465919
110	IPO9	importin 9 [Source:HGNC Symbol;Acc:HGNC:19425]	1.08641	0.0311709
111	XPO7	exportin 7 [Source:HGNC Symbol;Acc:HGNC:14108]	1.08256	0.0497073
112	PSMD1	proteasome 26S subunit, non-ATPase 1 [Source:HGNC Symbol;Acc:HGNC:9554]	1.05008	0.0347352
113	KYAT3	kynurenine aminotransferase 3 [Source:HGNC Symbol;Acc:HGNC:33238]	1.04967	0.049447
114	PSMB7	proteasome 20S subunit beta 7 [Source:HGNC Symbol;Acc:HGNC:9544]	1.04803	0.0103233
115	PSMA4	proteasome 20S subunit alpha 4 [Source:HGNC Symbol;Acc:HGNC:9533]	1.04453	0.00219599
116	DNPH1	2'-deoxynucleoside 5'-phosphate N-hydrolase 1 [Source:HGNC Symbol;Acc:HGNC:21218]	1.04361	0.0467638
117	DIS3L2	DIS3 like 3'-5' exoribonuclease 2 [Source:HGNC Symbol;Acc:HGNC:28648]	1.04025	0.0246093
118	SRGAP2	SLIT-ROBO Rho GTPase activating protein 2 [Source:HGNC Symbol;Acc:HGNC:19751]	1.00612	0.0324078
119	AHSA1	activator of HSP90 ATPase activity 1 [Source:HGNC Symbol;Acc:HGNC:1189]	1.00159	0.037819
120	RARS	arginyl-TRNA Synthetase	-1.00332	0.041186
121	MYL6	myosin light chain 6 [Source:HGNC Symbol;Acc:HGNC:7587]	-1.01239	0.014288
122	S100A13	S100 calcium binding protein A13 [Source:HGNC Symbol;Acc:HGNC:10490]	-1.10329	0.0344524
123	JAM3	junctional adhesion molecule 3 [Source:HGNC Symbol;Acc:HGNC:15532]	-1.11106	0.0184948
124	DDB2	damage specific DNA binding protein 2 [Source:HGNC Symbol;Acc:HGNC:2718]	-1.13422	0.0317336
125	FIBIN	fin bud initiation factor homolog [Source:HGNC Symbol;Acc:HGNC:33747]	-1.16633	0.0288197
126	SEC14L2	SEC14 like lipid binding 2 [Source:HGNC Symbol;Acc:HGNC:10699]	-1.20609	0.0225814
127	WARS	tryptophanyl-TRNA Synthetase	-1.20626	0.0349567
128	ERAP1	endoplasmic reticulum aminopeptidase 1 [Source:HGNC Symbol;Acc:HGNC:18173]	-1.21411	0.0388741
129	PCK2	phosphoenolpyruvate carboxykinase 2, mitochondrial [Source:HGNC Symbol;Acc:HGNC:8725]	-1.22139	0.0262652
130	LMNA	lamin A/C [Source:HGNC Symbol;Acc:HGNC:6636]	-1.23074	0.0268596
131	FMR1	FMRP translational regulator 1 [Source:HGNC Symbol;Acc:HGNC:3775]	-1.24797	0.0267664
132	TP53I3	tumor protein p53 inducible protein 3 [Source:HGNC Symbol;Acc:HGNC:19373]	-1.2742	0.0420155
133	S100A11	S100 calcium binding protein A11 [Source:HGNC Symbol;Acc:HGNC:10488]	-1.27533	0.0173912
134	GLG1	golgi glycoprotein 1 [Source:HGNC Symbol;Acc:HGNC:4316]	-1.27953	0.0353134
135	PTGR1	prostaglandin reductase 1 [Source:HGNC Symbol;Acc:HGNC:18429]	-1.28717	0.00388231
136	NELFB	negative elongation factor complex member B [Source:HGNC Symbol;Acc:HGNC:24324]	-1.31494	0.00144867
137	GGH	gamma-glutamyl hydrolase [Source:HGNC Symbol;Acc:HGNC:4248]	-1.32219	0.0311243
138	RRAGA	Ras related GTP binding A [Source:HGNC Symbol;Acc:HGNC:16963]	-1.42231	0.00655722
139	CACHD1	cache domain containing 1 [Source:HGNC Symbol;Acc:HGNC:29314]	-1.43073	0.0384025
140	MYO1C	myosin IC [Source:HGNC Symbol;Acc:HGNC:7597]	-1.47454	0.0156585
141	AP2S1	adaptor related protein complex 2 subunit sigma 1 [Source:HGNC Symbol;Acc:HGNC:565]	-1.48054	0.00511482
142	MATN2	matrilin 2 [Source:HGNC Symbol;Acc:HGNC:6908]	-1.4926	0.0486194
143	FUT11	fucosyltransferase 11 [Source:HGNC Symbol;Acc:HGNC:19233]	-1.56146	0.025432
144	CADM4	cell adhesion molecule 4 [Source:HGNC Symbol;Acc:HGNC:30825]	-1.56434	0.0417705
145	MANEA	mannosidase endo-alpha [Source:HGNC Symbol;Acc:HGNC:21072]	-1.62626	0.0172799
146	COL11A1	collagen type XI alpha 1 chain [Source:HGNC Symbol;Acc:HGNC:2186]	-1.69723	0.046971
147	BCAM	basal cell adhesion molecule (Lutheran blood group) [Source:HGNC Symbol;Acc:HGNC:6722]	-1.7086	0.0145569
148	COLGALT1	collagen beta(1-O)galactosyltransferase 1 [Source:HGNC Symbol;Acc:HGNC:26182]	-1.76529	0.0479314
149	ITGA5	integrin subunit alpha 5 [Source:HGNC Symbol;Acc:HGNC:6141]	-1.76609	0.0412572
150	CCDC80	coiled-coil domain containing 80 [Source:HGNC Symbol;Acc:HGNC:30649]	-1.77343	0.0174671
151	PCDH1	protocadherin 1 [Source:HGNC Symbol;Acc:HGNC:8655]	-1.78301	0.0117858
152	PDLIM7	PDZ and LIM domain 7 [Source:HGNC Symbol;Acc:HGNC:22958]	-1.80991	0.0455323
153	NOV	Nephroblastoma overexpressed	-1.85465	0.000214052
154	C1GALT1C1	C1GALT1 specific chaperone 1 [Source:HGNC Symbol;Acc:HGNC:24338]	-1.8709	0.00307588
155	LAMA5	laminin subunit alpha 5 [Source:HGNC Symbol;Acc:HGNC:6485]	-1.9305	0.0122262
156	SUMF1	sulfatase modifying factor 1 [Source:HGNC Symbol;Acc:HGNC:20376]	-1.95468	0.025878
157	ACOT13	acyl-CoA thioesterase 13 [Source:HGNC Symbol;Acc:HGNC:20999]	-1.95891	0.0403432
158	GALNT2	polypeptide N-acetylgalactosaminyltransferase 2 [Source:HGNC Symbol;Acc:HGNC:4124]	-1.99279	0.0142043
159	UBE2L6	ubiquitin conjugating enzyme E2 L6 [Source:HGNC Symbol;Acc:HGNC:12490]	-2.03239	0.00281074
160	OSMR	oncostatin M receptor [Source:HGNC Symbol;Acc:HGNC:8507]	-2.03513	0.0122107
161	STAT1	signal transducer and activator of transcription 1 [Source:HGNC Symbol;Acc:HGNC:11362]	-2.05066	0.00150377
162	IL6ST	interleukin 6 signal transducer [Source:HGNC Symbol;Acc:HGNC:6021]	-2.05514	0.0125395
163	CHST3	carbohydrate sulfotransferase 3 [Source:HGNC Symbol;Acc:HGNC:1971]	-2.08289	0.015564
164	ENTPD6	ectonucleoside triphosphate diphosphohydrolase 6 [Source:HGNC Symbol;Acc:HGNC:3368]	-2.08375	0.0331971
165	SEMA3E	semaphorin 3E [Source:HGNC Symbol;Acc:HGNC:10727]	-2.09391	0.0338501
166	COL7A1	collagen type VII alpha 1 chain [Source:HGNC Symbol;Acc:HGNC:2214]	-2.10879	0.0201493
167	IFI35	interferon induced protein 35 [Source:HGNC Symbol;Acc:HGNC:5399]	-2.11323	0.0105655
168	HLA-A	major histocompatibility complex, class I, A [Source:HGNC Symbol;Acc:HGNC:4931]	-2.11493	0.00782726
169	GALNT6	polypeptide N-acetylgalactosaminyltransferase 6 [Source:HGNC Symbol;Acc:HGNC:4128]	-2.12007	0.0478641
170	LOXL3	lysyl oxidase like 3 [Source:HGNC Symbol;Acc:HGNC:13869]	-2.17002	0.0143519
171	NCS1	neuronal calcium sensor 1 [Source:HGNC Symbol;Acc:HGNC:3953]	-2.17231	0.0433142
172	PLOD1	procollagen-lysine,2-oxoglutarate 5-dioxygenase 1 [Source:HGNC Symbol;Acc:HGNC:9081]	-2.19026	0.00264144
173	ATP1B3	ATPase Na+/K+ transporting subunit beta 3 [Source:HGNC Symbol;Acc:HGNC:806]	-2.21764	0.0355525
174	B3GAT3	beta-1,3-glucuronyltransferase 3 [Source:HGNC Symbol;Acc:HGNC:923]	-2.23719	0.0390517
175	NISCH	nischarin [Source:HGNC Symbol;Acc:HGNC:18006]	-2.25121	0.0143054
176	HLA-B	major histocompatibility complex, class I, B [Source:HGNC Symbol;Acc:HGNC:4932]	-2.29952	0.0467671
177	ADAM17	ADAM metallopeptidase domain 17 [Source:HGNC Symbol;Acc:HGNC:195]	-2.3221	0.000247531
178	CTSO	cathepsin O [Source:HGNC Symbol;Acc:HGNC:2542]	-2.34503	0.0260447
179	CRTAP	cartilage associated protein [Source:HGNC Symbol;Acc:HGNC:2379]	-2.36713	0.0372383
180	LTBP2	latent transforming growth factor beta binding protein 2 [Source:HGNC Symbol;Acc:HGNC:6715]	-2.36735	0.0171929
181	NAGLU	N-acetyl-alpha-glucosaminidase [Source:HGNC Symbol;Acc:HGNC:7632]	-2.41011	0.0054747
182	TNC	tenascin C [Source:HGNC Symbol;Acc:HGNC:5318]	-2.43714	0.000334719
183	AXL	AXL receptor tyrosine kinase [Source:HGNC Symbol;Acc:HGNC:905]	-2.43929	0.00298621
184	VGF	VGF nerve growth factor inducible [Source:HGNC Symbol;Acc:HGNC:12684]	-2.44229	0.041223
185	TGFBR3	transforming growth factor beta receptor 3 [Source:HGNC Symbol;Acc:HGNC:11774]	-2.47336	0.0426089
186	EXT1	exostosin glycosyltransferase 1 [Source:HGNC Symbol;Acc:HGNC:3512]	-2.49372	0.030274
187	S100A16	S100 calcium binding protein A16 [Source:HGNC Symbol;Acc:HGNC:20441]	-2.49858	0.0129247
188	DNAJB11	DnaJ heat shock protein family (Hsp40) member B11 [Source:HGNC Symbol;Acc:HGNC:14889]	-2.49868	0.00163452
189	ATP2B4	ATPase plasma membrane Ca2+ transporting 4 [Source:HGNC Symbol;Acc:HGNC:817]	-2.55557	0.0246803
190	CHPF	chondroitin polymerizing factor [Source:HGNC Symbol;Acc:HGNC:24291]	-2.56919	0.00545092
191	FUCA1	alpha-L-fucosidase 1 [Source:HGNC Symbol;Acc:HGNC:4006]	-2.59686	0.0486116
192	SEZ6L2	seizure related 6 homolog like 2 [Source:HGNC Symbol;Acc:HGNC:30844]	-2.64925	0.0153285
193	MMP11	matrix metallopeptidase 11 [Source:HGNC Symbol;Acc:HGNC:7157]	-2.6845	0.011259
194	EXTL2	exostosin like glycosyltransferase 2 [Source:HGNC Symbol;Acc:HGNC:3516]	-2.70555	0.0405471
195	ECE1	endothelin converting enzyme 1 [Source:HGNC Symbol;Acc:HGNC:3146]	-2.72825	0.00215929
196	ITGB1	integrin subunit beta 1 [Source:HGNC Symbol;Acc:HGNC:6153]	-2.74157	0.0236483
197	EFNB3	ephrin B3 [Source:HGNC Symbol;Acc:HGNC:3228]	-2.7441	0.0296401
198	APMAP	adipocyte plasma membrane associated protein [Source:HGNC Symbol;Acc:HGNC:13238]	-2.75736	0.0458332
199	CTSL	cathepsin L [Source:HGNC Symbol;Acc:HGNC:2537]	-2.76252	0.0157344
200	NID1	nidogen 1 [Source:HGNC Symbol;Acc:HGNC:7821]	-2.76851	0.0068091
201	C2	complement C2 [Source:HGNC Symbol;Acc:HGNC:1248]	-2.77688	0.0190436
202	SPP1	secreted phosphoprotein 1 [Source:HGNC Symbol;Acc:HGNC:11255]	-2.81903	0.0312622
203	CDON	cell adhesion associated, oncogene regulated [Source:HGNC Symbol;Acc:HGNC:17104]	-2.82126	0.048405
204	DNASE2	deoxyribonuclease 2, lysosomal [Source:HGNC Symbol;Acc:HGNC:2960]	-2.85467	0.00975147
205	MAN2B1	mannosidase alpha class 2B member 1 [Source:HGNC Symbol;Acc:HGNC:6826]	-2.88596	0.0314688
206	SDF4	stromal cell derived factor 4 [Source:HGNC Symbol;Acc:HGNC:24188]	-2.90881	0.023101
207	GBA	glucosylceramidase beta [Source:HGNC Symbol;Acc:HGNC:4177]	-2.91837	0.0498184
208	CTSC	cathepsin C [Source:HGNC Symbol;Acc:HGNC:2528]	-2.94659	0.0128843
209	LTF	lactotransferrin [Source:HGNC Symbol;Acc:HGNC:6720]	-2.96674	0.0226292
210	ENDOD1	endonuclease domain containing 1 [Source:HGNC Symbol;Acc:HGNC:29129]	-2.96769	0.00274954
211	PCSK6	proprotein convertase subtilisin/kexin type 6 [Source:HGNC Symbol;Acc:HGNC:8569]	-2.98969	0.0469289
212	ACADVL	acyl-CoA dehydrogenase very long chain [Source:HGNC Symbol;Acc:HGNC:92]	-3.02248	0.000206505
213	IGFBP2	insulin like growth factor binding protein 2 [Source:HGNC Symbol;Acc:HGNC:5471]	-3.02952	0.00465822
214	CTSS	cathepsin S [Source:HGNC Symbol;Acc:HGNC:2545]	-3.10867	0.0100904
215	NUCB1	nucleobindin 1 [Source:HGNC Symbol;Acc:HGNC:8043]	-3.11244	0.00346234
216	NPTXR	neuronal pentraxin receptor [Source:HGNC Symbol;Acc:HGNC:7954]	-3.1522	0.0155032
217	B4GALT1	beta-1,4-galactosyltransferase 1 [Source:HGNC Symbol;Acc:HGNC:924]	-3.17196	0.0439531
218	CSF1	colony stimulating factor 1 [Source:HGNC Symbol;Acc:HGNC:2432]	-3.18878	0.00727194
219	LGMN	legumain [Source:HGNC Symbol;Acc:HGNC:9472]	-3.20044	0.0352826
220	GBP1	guanylate binding protein 1 [Source:HGNC Symbol;Acc:HGNC:4182]	-3.22291	0.0180281
221	GPC1	glypican 1 [Source:HGNC Symbol;Acc:HGNC:4449]	-3.22424	0.00978521
222	MYOF	myoferlin [Source:HGNC Symbol;Acc:HGNC:3656]	-3.22756	0.0239745
223	GLCE	glucuronic acid epimerase [Source:HGNC Symbol;Acc:HGNC:17855]	-3.25667	0.0352923
224	EXT2	exostosin glycosyltransferase 2 [Source:HGNC Symbol;Acc:HGNC:3513]	-3.26398	0.0277198
225	MVP	major vault protein [Source:HGNC Symbol;Acc:HGNC:7531]	-3.30045	0.0494072
226	SMPD1	sphingomyelin phosphodiesterase 1 [Source:HGNC Symbol;Acc:HGNC:11120]	-3.34496	0.00900534
227	CD109	CD109 molecule [Source:HGNC Symbol;Acc:HGNC:21685]	-3.35279	0.00563093
228	FBN1	fibrillin 1 [Source:HGNC Symbol;Acc:HGNC:3603]	-3.39735	0.01706
229	EDIL3	EGF like repeats and discoidin domains 3 [Source:HGNC Symbol;Acc:HGNC:3173]	-3.40126	0.0032725
230	GALNT7	polypeptide N-acetylgalactosaminyltransferase 7 [Source:HGNC Symbol;Acc:HGNC:4129]	-3.40143	0.0405397
231	FUCA2	alpha-L-fucosidase 2 [Source:HGNC Symbol;Acc:HGNC:4008]	-3.41175	0.0283054
232	SEMA4B	semaphorin 4B [Source:HGNC Symbol;Acc:HGNC:10730]	-3.41549	0.0077101
233	NOMO1	NODAL modulator 1 [Source:HGNC Symbol;Acc:HGNC:30060]	-3.42135	0.0265051
234	AKR1C3	aldo-keto reductase family 1 member C3 [Source:HGNC Symbol;Acc:HGNC:386]	-3.42271	0.0451004
235	FBLN1	fibulin 1 [Source:HGNC Symbol;Acc:HGNC:3600]	-3.47815	5.35032e-05
236	CD47	CD47 molecule [Source:HGNC Symbol;Acc:HGNC:1682]	-3.48711	0.00582814
237	ANTXR1	ANTXR cell adhesion molecule 1 [Source:HGNC Symbol;Acc:HGNC:21014]	-3.50474	0.00334164
238	CD44	CD44 molecule (Indian blood group) [Source:HGNC Symbol;Acc:HGNC:1681]	-3.57156	0.0105633
239	APLP1	amyloid beta precursor like protein 1 [Source:HGNC Symbol;Acc:HGNC:597]	-3.59608	0.000191929
240	FAM20C	FAM20C golgi associated secretory pathway kinase [Source:HGNC Symbol;Acc:HGNC:22140]	-3.6514	0.0386136
241	FBLN5	fibulin 5 [Source:HGNC Symbol;Acc:HGNC:3602]	-3.65941	0.000115486
242	LIF	LIF interleukin 6 family cytokine [Source:HGNC Symbol;Acc:HGNC:6596]	-3.66503	0.00215353
243	SIL1	SIL1 nucleotide exchange factor [Source:HGNC Symbol;Acc:HGNC:24624]	-3.67825	0.0353037
244	ANGPTL4	angiopoietin like 4 [Source:HGNC Symbol;Acc:HGNC:16039]	-3.7115	0.024935
245	IGFBP7	insulin like growth factor binding protein 7 [Source:HGNC Symbol;Acc:HGNC:5476]	-3.73439	0.0442507
246	PRSS23	serine protease 23 [Source:HGNC Symbol;Acc:HGNC:14370]	-3.76198	0.0151133
247	PDGFRL	platelet derived growth factor receptor like [Source:HGNC Symbol;Acc:HGNC:8805]	-3.76579	0.00295175
248	SERPINE1	serpin family E member 1 [Source:HGNC Symbol;Acc:HGNC:8583]	-3.81875	0.0381294
249	P4HA2	prolyl 4-hydroxylase subunit alpha 2 [Source:HGNC Symbol;Acc:HGNC:8547]	-3.83201	0.0302643
250	ANXA6	annexin A6 [Source:HGNC Symbol;Acc:HGNC:544]	-3.84787	0.0276503
251	TPP1	tripeptidyl peptidase 1 [Source:HGNC Symbol;Acc:HGNC:2073]	-3.86348	0.0312155
252	FSD1	fibronectin type III and SPRY domain containing 1 [Source:HGNC Symbol;Acc:HGNC:13745]	-3.90984	0.0012324
253	ITM2B	integral membrane protein 2B [Source:HGNC Symbol;Acc:HGNC:6174]	-3.91769	0.0205693
254	CLU	clusterin [Source:HGNC Symbol;Acc:HGNC:2095]	-3.92614	0.042461
255	TCN2	transcobalamin 2 [Source:HGNC Symbol;Acc:HGNC:11653]	-3.95916	0.0446365
256	PAM	peptidylglycine alpha-amidating monooxygenase [Source:HGNC Symbol;Acc:HGNC:8596]	-3.96071	0.0223218
257	MAN2B2	mannosidase alpha class 2B member 2 [Source:HGNC Symbol;Acc:HGNC:29623]	-3.98095	0.00315675
258	CA13	carbonic anhydrase 13 [Source:HGNC Symbol;Acc:HGNC:14914]	-4.02731	0.000412382
259	DDR1	discoidin domain receptor tyrosine kinase 1 [Source:HGNC Symbol;Acc:HGNC:2730]	-4.04975	0.00507809
260	SPOCK1	SPARC (osteonectin), cwcv and kazal like domains proteoglycan 1 [Source:HGNC Symbol;Acc:HGNC:11251]	-4.05094	0.0360305
261	GALNS	galactosamine (N-acetyl)-6-sulfatase [Source:HGNC Symbol;Acc:HGNC:4122]	-4.0603	0.00323698
262	C1QL1	complement C1q like 1 [Source:HGNC Symbol;Acc:HGNC:24182]	-4.07818	0.00562393
263	SEMA3C	semaphorin 3C [Source:HGNC Symbol;Acc:HGNC:10725]	-4.08972	0.0222818
264	CAPG	capping actin protein, gelsolin like [Source:HGNC Symbol;Acc:HGNC:1474]	-4.10092	0.00920407
265	MAN1A2	mannosidase alpha class 1A member 2 [Source:HGNC Symbol;Acc:HGNC:6822]	-4.17735	0.0264186
266	HSPA13	heat shock protein family A (Hsp70) member 13 [Source:HGNC Symbol;Acc:HGNC:11375]	-4.2263	0.0304032
267	PSAP	prosaposin [Source:HGNC Symbol;Acc:HGNC:9498]	-4.23594	0.0469721
268	ANXA1	annexin A1 [Source:HGNC Symbol;Acc:HGNC:533]	-4.25815	0.0270863
269	SCUBE3	signal peptide, CUB domain and EGF like domain containing 3 [Source:HGNC Symbol;Acc:HGNC:13655]	-4.29225	0.00222305
270	LAMB2	laminin subunit beta 2 [Source:HGNC Symbol;Acc:HGNC:6487]	-4.31322	0.00474515
271	HTRA1	HtrA serine peptidase 1 [Source:HGNC Symbol;Acc:HGNC:9476]	-4.36794	0.0446149
272	C1QTNF1	C1q and TNF related 1 [Source:HGNC Symbol;Acc:HGNC:14324]	-4.38447	0.00238007
273	COL5A2	collagen type V alpha 2 chain [Source:HGNC Symbol;Acc:HGNC:2210]	-4.39621	0.0253484
274	SEMA3B	semaphorin 3B [Source:HGNC Symbol;Acc:HGNC:10724]	-4.40113	0.000866323
275	C1QTNF5	C1q and TNF related 5 [Source:HGNC Symbol;Acc:HGNC:14344]	-4.40852	0.000565692
276	VWA1	von Willebrand factor A domain containing 1 [Source:HGNC Symbol;Acc:HGNC:30910]	-4.40928	0.0155887
277	COL6A2	collagen type VI alpha 2 chain [Source:HGNC Symbol;Acc:HGNC:2212]	-4.46436	0.0132978
278	GALNT16	polypeptide N-acetylgalactosaminyltransferase 16 [Source:HGNC Symbol;Acc:HGNC:23233]	-4.50125	0.00351593
279	PPP1R10	protein phosphatase 1 regulatory subunit 10 [Source:HGNC Symbol;Acc:HGNC:9284]	-4.53938	0.0336186
280	ANGPTL2	angiopoietin like 2 [Source:HGNC Symbol;Acc:HGNC:490]	-4.55705	0.000570571
281	COL18A1	collagen type XVIII alpha 1 chain [Source:HGNC Symbol;Acc:HGNC:2195]	-4.5631	0.0113637
282	FMOD	fibromodulin [Source:HGNC Symbol;Acc:HGNC:3774]	-4.58862	0.0032774
283	ADAM10	ADAM metallopeptidase domain 10 [Source:HGNC Symbol;Acc:HGNC:188]	-4.68294	0.000262482
284	C1QTNF6	C1q and TNF related 6 [Source:HGNC Symbol;Acc:HGNC:14343]	-4.71346	0.00225652
285	IGFBP6	insulin like growth factor binding protein 6 [Source:HGNC Symbol;Acc:HGNC:5475]	-4.72239	0.00418688
286	CTSB	cathepsin B [Source:HGNC Symbol;Acc:HGNC:2527]	-4.72386	0.00170377
287	OLFML2A	olfactomedin like 2A [Source:HGNC Symbol;Acc:HGNC:27270]	-4.7391	0.0162271
288	KDELC1	KDEL motif-containing protein 1	-4.74032	0.0400037
289	IGFBP5	insulin like growth factor binding protein 5 [Source:HGNC Symbol;Acc:HGNC:5474]	-4.83369	0.00764258
290	C4B	complement C4B (Chido blood group) [Source:HGNC Symbol;Acc:HGNC:1324]	-4.88582	0.0500726
291	NT5E	5'-nucleotidase ecto [Source:HGNC Symbol;Acc:HGNC:8021]	-4.9163	0.00199324
292	LRRC15	leucine rich repeat containing 15 [Source:HGNC Symbol;Acc:HGNC:20818]	-4.96784	0.0291696
293	C1S	complement C1s [Source:HGNC Symbol;Acc:HGNC:1247]	-5.13639	0.0155457
294	ITGA3	integrin subunit alpha 3 [Source:HGNC Symbol;Acc:HGNC:6139]	-5.30068	0.000478112
295	CPA4	carboxypeptidase A4 [Source:HGNC Symbol;Acc:HGNC:15740]	-5.526	0.04605
296	DKK3	dickkopf WNT signaling pathway inhibitor 3 [Source:HGNC Symbol;Acc:HGNC:2893]	-5.98385	0.000412848
297	SRPX2	sushi repeat containing protein X-linked 2 [Source:HGNC Symbol;Acc:HGNC:30668]	-6.07813	0.000117769
298	PLAU	plasminogen activator, urokinase [Source:HGNC Symbol;Acc:HGNC:9052]	-6.25885	0.0180036
299	BMP1	bone morphogenetic protein 1 [Source:HGNC Symbol;Acc:HGNC:1067]	-6.44083	0.0119105
300	CFI	complement factor I [Source:HGNC Symbol;Acc:HGNC:5394]	-7.09611	0.00565405
301	C1R	complement C1r [Source:HGNC Symbol;Acc:HGNC:1246]	-7.13353	0.00375993
302	CP	ceruloplasmin [Source:HGNC Symbol;Acc:HGNC:2295]	-7.3812	0.00291219
303	THBS3	thrombospondin 3 [Source:HGNC Symbol;Acc:HGNC:11787]	-7.50272	0.00110775
