# Supplementary material for: Differentiated glioma cell-derived fibromodulin activates integrin-dependent Notch signaling in endothelial cells to promote tumor angiogenesis and growth
Source: eLife. 2022 Jun 1;11:e78972. doi: 10.7554/eLife.78972 (PMC9259034; doi:10.7554/eLife.78972)
Supplement: Supplementary file 2. [file elife-78972-supp2.xlsx]

## Sheet: GSEA_depleted gene sets
Supplementary File 2: List of significantly depleted gene sets from GSEA analysis in GSC vs. DGC RNA-Seq Data (GSE54792)
S.No	NAME	SIZE	ES*	NES#	NOM p-value^
1	BRCA2_TARGET_GENES	358	-0.237155	-1.25193	0
2	TRAVAGLINI_LUNG_CILIATED_CELL	252	-0.262666	-1.32146	0
3	HP_ABNORMAL_IMMUNE_SYSTEM_MORPHOLOGY	136	-0.287877	-1.37905	0
4	MIR6844	89	-0.298188	-1.3855	0
5	GSE26669_CTRL_VS_COSTIM_BLOCK_MLR_CD4_TCELL_UP	66	-0.308964	-1.38917	0
6	ACEVEDO_LIVER_CANCER_UP	284	-0.269267	-1.39014	0
7	HP_ABNORMAL_RESPIRATORY_SYSTEM_PHYSIOLOGY	346	-0.260549	-1.39167	0
8	STAT5A_03	63	-0.329593	-1.393	0
9	MODULE_37	131	-0.280075	-1.39696	0
10	MIR548F_5P	121	-0.292848	-1.40025	0
11	HP_ABNORMALITY_OF_DIGESTIVE_SYSTEM_MORPHOLOGY	241	-0.267181	-1.40088	0
12	MIR182_5P	149	-0.287822	-1.40943	0
13	HP_ABNORMALITY_OF_NEUTROPHILS	66	-0.322015	-1.41639	0
14	GOBP_CHEMICAL_HOMEOSTASIS	263	-0.265157	-1.41717	0
15	MORF_NOS2A	54	-0.345925	-1.41935	0
16	MIR20A_5P	205	-0.287384	-1.42113	0
17	MIR519D_3P	185	-0.282468	-1.4232	0
18	HP_ABNORMALITY_OF_FONTANELLES	45	-0.370304	-1.42426	0
19	CTTTGA_LEF1_Q2	304	-0.257663	-1.42465	0
20	BACH2_TARGET_GENES	450	-0.258213	-1.42522	0
21	AACTTT_UNKNOWN	502	-0.257258	-1.42622	0
22	RUTELLA_RESPONSE_TO_HGF_DN	78	-0.333992	-1.42787	0
23	MIR8485	261	-0.278092	-1.43009	0
24	HP_ABNORMAL_HAIR_MORPHOLOGY	281	-0.273725	-1.43329	0
25	MARTINEZ_TP53_TARGETS_UP	182	-0.287379	-1.43545	0
26	CTTTAAR_UNKNOWN	252	-0.280365	-1.43736	0
27	HARALAMBIEVA_PBMC_M_M_R_II_AGE_11_22YO_VACCINATED_VS_UNVACCINATED_7YR_DN	176	-0.298254	-1.43915	0
28	GOBP_REGULATION_OF_TRANSFERASE_ACTIVITY	267	-0.273763	-1.43958	0
29	HP_ABNORMALITY_OF_THE_CURVATURE_OF_THE_VERTEBRAL_COLUMN	270	-0.279157	-1.44202	0
30	RYTTCCTG_ETS2_B	289	-0.276389	-1.44291	0
31	GOMF_PROTEIN_DOMAIN_SPECIFIC_BINDING	197	-0.283425	-1.44324	0
32	GOBP_REGULATION_OF_CELLULAR_COMPONENT_BIOGENESIS	273	-0.281798	-1.44371	0
33	GSE17974_CTRL_VS_ACT_IL4_AND_ANTI_IL12_1H_CD4_TCELL_DN	58	-0.34899	-1.44834	0
34	GOBP_CYTOSKELETON_ORGANIZATION	379	-0.270894	-1.45162	0
35	GOCC_ORGANELLE_SUBCOMPARTMENT	436	-0.266125	-1.45606	0
36	HP_ABNORMAL_CIRCULATING_METABOLITE_CONCENTRATION	277	-0.278509	-1.45637	0
37	GOBP_POSITIVE_REGULATION_OF_TRANSFERASE_ACTIVITY	186	-0.290899	-1.45673	0
38	BUSSLINGER_GASTRIC_IMMUNE_CELLS	423	-0.265161	-1.45769	0
39	MIR122B_5P	52	-0.364472	-1.45872	0
40	MIR20B_5P	187	-0.287607	-1.45998	0
41	RODRIGUES_THYROID_CARCINOMA_ANAPLASTIC_DN	158	-0.296517	-1.46071	0
42	MIR106A_5P	195	-0.285098	-1.46109	0
43	GOBP_POSITIVE_REGULATION_OF_DEVELOPMENTAL_GROWTH	45	-0.372282	-1.46376	0
44	HP_ABNORMAL_LOWER_LIMB_BONE_MORPHOLOGY	168	-0.284053	-1.4653	0
45	GSE3982_EFF_MEMORY_CD4_TCELL_VS_TH1_UP	38	-0.373184	-1.46694	0
46	MIR4795_3P	189	-0.302959	-1.46807	0
47	GSE43955_1H_VS_10H_ACT_CD4_TCELL_DN	69	-0.335158	-1.46998	0
48	GSE43955_1H_VS_60H_ACT_CD4_TCELL_WITH_TGFB_IL6_DN	66	-0.366014	-1.47165	0
49	HP_RESPIRATORY_TRACT_INFECTION	133	-0.296513	-1.4722	0
50	FLECHNER_PBL_KIDNEY_TRANSPLANT_OK_VS_DONOR_UP	51	-0.359369	-1.47507	0
51	HP_ABNORMALITY_OF_JOINT_MOBILITY	298	-0.278594	-1.47524	0
52	GSE360_CTRL_VS_L_MAJOR_DC_UP	58	-0.351919	-1.47587	0
53	STEIN_ESRRA_TARGETS_DN	39	-0.388919	-1.4776	0
54	TAATTA_CHX10_01	207	-0.303497	-1.47791	0
55	GSE9509_10MIN_VS_30MIN_LPS_STIM_IL10_KO_MACROPHAGE_UP	64	-0.349032	-1.4782	0
56	POU3F2_02	62	-0.324317	-1.47839	0
57	GSE27786_BCELL_VS_NKCELL_DN	56	-0.340433	-1.47933	0
58	GSE2706_R848_VS_LPS_8H_STIM_DC_DN	51	-0.371649	-1.47936	0
59	MIR130B_3P	112	-0.316661	-1.48071	0
60	GOBP_POSITIVE_REGULATION_OF_MOLECULAR_FUNCTION	461	-0.269599	-1.48122	0
61	GSE360_CTRL_VS_L_MAJOR_MAC_DN	54	-0.380317	-1.48224	0
62	NAKAYA_PBMC_FLUMIST_AGE_18_50YO_7DY_DN	215	-0.287736	-1.48457	0
63	FAN_OVARY_CL11_MURAL_GRANULOSA_CELL	158	-0.305541	-1.48794	0
64	FOSTER_TOLERANT_MACROPHAGE_DN	134	-0.305883	-1.48934	0
65	FOURATI_BLOOD_TWINRIX_AGE_25_83YO_RESPONDERS_VS_POOR_RESPONDERS_0DY_UP	137	-0.301471	-1.48962	0
66	GOBP_NEGATIVE_REGULATION_OF_EXTRINSIC_APOPTOTIC_SIGNALING_PATHWAY	33	-0.398606	-1.49082	0
67	GOBP_SMALL_GTPASE_MEDIATED_SIGNAL_TRANSDUCTION	142	-0.302534	-1.49161	0
68	JAEGER_METASTASIS_UP	18	-0.517445	-1.49479	0
69	HP_ABNORMALITY_OF_TEMPERATURE_REGULATION	91	-0.333695	-1.49503	0
70	MIR17_5P	189	-0.292036	-1.49564	0
71	GOBP_RESPONSE_TO_PEPTIDE	133	-0.311743	-1.49568	0
72	GOBP_MULTICELLULAR_ORGANISMAL_HOMEOSTASIS	120	-0.33359	-1.49638	0
73	GOBP_PLATELET_DERIVED_GROWTH_FACTOR_RECEPTOR_SIGNALING_PATHWAY	21	-0.459622	-1.49755	0
74	MAFG_TARGET_GENES	371	-0.271242	-1.49866	0
75	GSE43955_TH0_VS_TGFB_IL6_IL23_TH17_ACT_CD4_TCELL_52H_DN	63	-0.351985	-1.49994	0
76	HAHTOLA_MYCOSIS_FUNGOIDES_SKIN_UP	53	-0.367665	-1.50104	0
77	GOBP_G_PROTEIN_COUPLED_RECEPTOR_SIGNALING_PATHWAY	164	-0.307386	-1.5016	0
78	COLDREN_GEFITINIB_RESISTANCE_DN	42	-0.369888	-1.50225	0
79	AML1_01	69	-0.342631	-1.5035	0
80	MIR106B_5P	207	-0.286027	-1.50383	0
81	GSE17721_0.5H_VS_4H_GARDIQUIMOD_BMDC_DN	63	-0.353502	-1.50418	0
82	GSE14308_TH2_VS_NAIVE_CD4_TCELL_UP	45	-0.377347	-1.50494	0
83	MIR4267	60	-0.362347	-1.50578	0
84	GOBP_REGULATION_OF_CYTOSKELETON_ORGANIZATION	162	-0.312811	-1.50692	0
85	GSE19888_CTRL_VS_A3R_ACT_TREATED_MAST_CELL_PRETREATED_WITH_A3R_INH_DN	55	-0.361931	-1.50711	0
86	GOBP_CAMERA_TYPE_EYE_DEVELOPMENT	81	-0.327773	-1.50781	0
87	HP_FATIGUE	90	-0.333003	-1.508	0
88	GSE22443_NAIVE_VS_ACT_AND_IL2_TREATED_CD8_TCELL_UP	45	-0.392831	-1.51032	0
89	HP_ABNORMALITY_OF_THE_PALM	100	-0.306722	-1.51046	0
90	GOBP_PROTEOLYSIS	422	-0.281754	-1.51069	0
91	REACTOME_RHO_GTPASE_CYCLE	130	-0.315203	-1.51092	0
92	GSE24972_MARGINAL_ZONE_BCELL_VS_FOLLICULAR_BCELL_IRF8_KO_DN	42	-0.374062	-1.51097	0
93	GOBP_RESPONSE_TO_OXIDATIVE_STRESS	129	-0.313981	-1.51105	0
94	CHEN_HOXA5_TARGETS_9HR_UP	60	-0.357748	-1.51164	0
95	HP_ABNORMAL_RESPIRATORY_SYSTEM_MORPHOLOGY	294	-0.289814	-1.51182	0
96	GSE17301_IFNA2_VS_IFNA2_AND_ACD3_ACD28_STIM_CD8_TCELL_DN	58	-0.371553	-1.51247	0
97	GSE15735_CTRL_VS_HDAC_INHIBITOR_TREATED_CD4_TCELL_12H_DN	65	-0.376733	-1.51251	0
98	GOCC_ENDOSOME	246	-0.289918	-1.51653	0
99	GOBP_POSITIVE_REGULATION_OF_ANION_TRANSPORT	120	-0.323298	-1.51704	0
100	GOBP_POSITIVE_REGULATION_OF_CELL_DIFFERENTIATION	219	-0.296226	-1.51722	0
101	GOCC_VACUOLAR_MEMBRANE	114	-0.320298	-1.51722	0
102	GSE21546_UNSTIM_VS_ANTI_CD3_STIM_SAP1A_KO_AND_ELK1_KO_DP_THYMOCYTES_UP	47	-0.395209	-1.51767	0
103	GOBP_CELL_JUNCTION_ASSEMBLY	139	-0.308151	-1.518	0
104	GOBP_POSITIVE_REGULATION_OF_CATALYTIC_ACTIVITY	375	-0.288606	-1.51847	0
105	HOLLMANN_APOPTOSIS_VIA_CD40_DN	70	-0.360266	-1.51938	0
106	GSE26488_WT_VS_HDAC7_DELTAP_TG_OT2_THYMOCYTE_WITH_PEPTIDE_INJECTION_DN	78	-0.348467	-1.5196	0
107	GSE34156_UNTREATED_VS_24H_NOD2_AND_TLR1_TLR2_LIGAND_TREATED_MONOCYTE_UP	54	-0.378171	-1.52024	0
108	GSE14415_INDUCED_TREG_VS_FOXP3_KO_INDUCED_TREG_IL2_CULTURE_UP	46	-0.393815	-1.52054	0
109	PTEN_DN.V1_DN	31	-0.446129	-1.52086	0
110	GSE26488_WT_VS_VP16_TRANSGENIC_HDAC7_KO_DOUBLE_POSITIVE_THYMOCYTE_UP	58	-0.360294	-1.52088	0
111	AMUNDSON_RESPONSE_TO_ARSENITE	67	-0.355627	-1.5212	0
112	GOBP_GROWTH	236	-0.309768	-1.5219	0
113	GSE5455_HEALTHY_VS_TUMOR_BEARING_MOUSE_SPLEEN_MONOCYTE_DN	56	-0.359467	-1.5222	0
114	MIR30A_3P	101	-0.335998	-1.52398	0
115	MIR181B_2_3P_MIR181B_3P	52	-0.348415	-1.5245	0
116	MODULE_532	100	-0.34309	-1.52535	0
117	GSE3982_EOSINOPHIL_VS_NEUTROPHIL_DN	52	-0.372	-1.52554	0
118	HP_ABNORMAL_MORPHOLOGY_OF_THE_GREAT_VESSELS	147	-0.320811	-1.52635	0
119	GSE36888_UNTREATED_VS_IL2_TREATED_STAT5_AB_KNOCKIN_TCELL_6H_DN	63	-0.356212	-1.52664	0
120	GOCC_SIDE_OF_MEMBRANE	119	-0.317385	-1.52709	0
121	GOBP_CELLULAR_RESPONSE_TO_OXYGEN_CONTAINING_COMPOUND	289	-0.288192	-1.52725	0
122	GOBP_APOPTOTIC_PROCESS	518	-0.280013	-1.52794	0
123	GSE16450_IMMATURE_VS_MATURE_NEURON_CELL_LINE_12H_IFNA_STIM_UP	55	-0.39775	-1.52914	0
124	GOBP_CELLULAR_RESPONSE_TO_EXTRACELLULAR_STIMULUS	76	-0.361099	-1.53057	0
125	GOBP_ENDOMEMBRANE_SYSTEM_ORGANIZATION	132	-0.319488	-1.53067	0
126	BCAT_BILD_ET_AL_UP	17	-0.501444	-1.53089	0
127	GOBP_NEGATIVE_REGULATION_OF_PHOSPHORUS_METABOLIC_PROCESS	122	-0.323359	-1.53189	0
128	HP_CORNEAL_OPACITY	48	-0.401782	-1.53276	0
129	MIR497_3P	46	-0.384047	-1.53284	0
130	GOCC_VACUOLE	207	-0.301815	-1.53345	0
131	GSE19401_UNSTIM_VS_PAM2CSK4_STIM_FOLLICULAR_DC_UP	57	-0.360585	-1.53531	0
132	HP_ABNORMALITY_OF_MOUTH_SIZE	93	-0.352073	-1.53605	0
133	BONOME_OVARIAN_CANCER_SURVIVAL_SUBOPTIMAL_DEBULKING	174	-0.313223	-1.53617	0
134	TRAVAGLINI_LUNG_PROLIFERATING_MACROPHAGE_CELL	314	-0.293416	-1.53657	0
135	MITSIADES_RESPONSE_TO_APLIDIN_UP	140	-0.306203	-1.53908	0
136	GSE3982_EOSINOPHIL_VS_TH1_UP	52	-0.385811	-1.53927	0
137	GOBP_REGULATION_OF_SMALL_GTPASE_MEDIATED_SIGNAL_TRANSDUCTION	96	-0.322458	-1.54162	0
138	GOBP_POSITIVE_REGULATION_OF_CELLULAR_COMPONENT_BIOGENESIS	141	-0.32775	-1.54193	0
139	GSE25088_CTRL_VS_IL4_AND_ROSIGLITAZONE_STIM_STAT6_KO_MACROPHAGE_DN	39	-0.4039	-1.54263	0
140	HP_MYOPIA	70	-0.369339	-1.54419	0
141	GSE17186_MEMORY_VS_NAIVE_BCELL_UP	53	-0.391439	-1.54503	0
142	GOBP_REGULATION_OF_GROWTH	175	-0.311145	-1.54703	0
143	GOBP_EMBRYO_DEVELOPMENT_ENDING_IN_BIRTH_OR_EGG_HATCHING	158	-0.3131	-1.54719	0
144	GOBP_POSITIVE_REGULATION_OF_GENE_EXPRESSION	274	-0.296267	-1.54847	0
145	RIEGE_DELTANP63_DIRECT_TARGETS_UP	44	-0.392644	-1.54886	0
146	GSE9316_IL6_KO_VS_IFNG_KO_INVIVO_EXPANDED_CD4_TCELL_UP	58	-0.395419	-1.54942	0
147	HP_ABNORMAL_UPPER_LIMB_BONE_MORPHOLOGY	113	-0.319527	-1.54956	0
148	GSE35685_CD34POS_CD10NEG_CD62LPOS_VS_CD34POS_CD10POS_BONE_MARROW_DN	54	-0.36768	-1.54977	0
149	MODULE_179	118	-0.324212	-1.54994	0
150	GOCC_MEMBRANE_MICRODOMAIN	106	-0.330615	-1.55038	0
151	GOBP_HOMEOSTATIC_PROCESS	469	-0.278334	-1.5515	0
152	GOCC_CELL_LEADING_EDGE	140	-0.324015	-1.55279	0
153	GSE2706_2H_VS_8H_R848_AND_LPS_STIM_DC_DN	61	-0.390778	-1.55535	0
154	GOCC_COATED_VESICLE_MEMBRANE	53	-0.401694	-1.55543	0
155	GOCC_ENDOPLASMIC_RETICULUM	478	-0.281344	-1.55564	0
156	GSE40274_CTRL_VS_LEF1_TRANSDUCED_ACTIVATED_CD4_TCELL_UP	53	-0.370306	-1.55566	0
157	GOBP_POSITIVE_REGULATION_OF_LEUKOCYTE_CELL_CELL_ADHESION	55	-0.368641	-1.55772	0
158	SCHLOSSER_SERUM_RESPONSE_UP	31	-0.431035	-1.55816	0
159	GOBP_POSITIVE_REGULATION_OF_SMALL_MOLECULE_METABOLIC_PROCESS	30	-0.41836	-1.55857	0
160	GOBP_BIOLOGICAL_PROCESS_INVOLVED_IN_SYMBIOTIC_INTERACTION	266	-0.29972	-1.559	0
161	KEGG_PATHWAYS_IN_CANCER	91	-0.347758	-1.55926	0
162	GOBP_ADAPTIVE_IMMUNE_RESPONSE_BASED_ON_SOMATIC_RECOMBINATION_OF_IMMUNE_RECEPTORS_ BUILT_FROM_IMMUNOGLOBULIN_SUPERFAMILY_DOMAINS	61	-0.38065	-1.56124	0
163	GOBP_NEGATIVE_REGULATION_OF_APOPTOTIC_SIGNALING_PATHWAY	65	-0.364861	-1.56125	0
164	MIR3924	85	-0.366085	-1.56296	0
165	GOBP_EMBRYONIC_ORGAN_DEVELOPMENT	104	-0.363364	-1.56298	0
166	GOBP_REGULATION_OF_DEFENSE_RESPONSE	169	-0.315256	-1.563	0
167	GOBP_ACTIN_FILAMENT_BUNDLE_ORGANIZATION	47	-0.422963	-1.56329	0
168	GOBP_NEGATIVE_REGULATION_OF_CELL_DEATH	274	-0.292786	-1.56334	0
169	TOOKER_GEMCITABINE_RESISTANCE_DN	44	-0.418941	-1.56365	0
170	GSE17721_0.5H_VS_24H_LPS_BMDC_DN	60	-0.367213	-1.56392	0
171	GSE26030_UNSTIM_VS_RESTIM_TH1_DAY5_POST_POLARIZATION_UP	74	-0.360101	-1.56515	0
172	MODULE_378	107	-0.344706	-1.56577	0
173	GSE30083_SP2_VS_SP4_THYMOCYTE_DN	54	-0.399717	-1.56592	0
174	GSE10325_BCELL_VS_LUPUS_BCELL_DN	74	-0.351461	-1.56599	0
175	GOBP_REGULATION_OF_CELLULAR_COMPONENT_SIZE	112	-0.336146	-1.56614	0
176	GOBP_REGULATION_OF_PROTEOLYSIS	192	-0.320222	-1.56649	0
177	GSE17721_PAM3CSK4_VS_GADIQUIMOD_2H_BMDC_UP	46	-0.373738	-1.56652	0
178	HP_ECHOLALIA	18	-0.525863	-1.56814	0
179	GOBP_REGULATION_OF_PROTEIN_KINASE_ACTIVITY	207	-0.312147	-1.56836	0
180	GSE15750_WT_VS_TRAF6KO_DAY6_EFF_CD8_TCELL_DN	44	-0.383609	-1.56889	0
181	LAKE_ADULT_KIDNEY_C19_COLLECTING_DUCT_INTERCALATED_CELLS_TYPE_A_MEDULLA	110	-0.332775	-1.56958	0
182	MIR629_3P	51	-0.390136	-1.56961	0
183	GOBP_PATTERN_RECOGNITION_RECEPTOR_SIGNALING_PATHWAY	66	-0.391936	-1.56969	0
184	GOBP_REGULATION_OF_IMMUNE_RESPONSE	210	-0.316852	-1.57007	0
185	ACEVEDO_LIVER_CANCER_WITH_H3K27ME3_DN	56	-0.389811	-1.57263	0
186	KAECH_NAIVE_VS_MEMORY_CD8_TCELL_DN	72	-0.375228	-1.57302	0
187	FOXH1_TARGET_GENES	205	-0.325352	-1.57365	0
188	GSE15330_HSC_VS_GRANULOCYTE_MONOCYTE_PROGENITOR_IKAROS_KO_UP	66	-0.377054	-1.57414	0
189	GOBP_RESPONSE_TO_LIPID	223	-0.310275	-1.57493	0
190	GOBP_REGULATION_OF_DNA_BINDING_TRANSCRIPTION_FACTOR_ACTIVITY	116	-0.334105	-1.57508	0
191	GOBP_REGULATION_OF_MUSCLE_ADAPTATION	28	-0.452445	-1.57519	0
192	GSE3982_MEMORY_CD4_TCELL_VS_TH1_UP	49	-0.385058	-1.57534	0
193	OCT1_05	65	-0.365279	-1.57553	0
194	JOHNSTONE_PARVB_TARGETS_2_DN	88	-0.349197	-1.5758	0
195	GSE40274_CTRL_VS_XBP1_TRANSDUCED_ACTIVATED_CD4_TCELL_UP	46	-0.391912	-1.57588	0
196	GSE36888_UNTREATED_VS_IL2_TREATED_TCELL_6H_UP	47	-0.395271	-1.57602	0
197	MARTORIATI_MDM4_TARGETS_FETAL_LIVER_DN	143	-0.322734	-1.57618	0
198	BLANCO_MELO_COVID19_SARS_COV_2_INFECTION_A594_ACE2_EXPRESSING_CELLS_UP	127	-0.338882	-1.57624	0
199	VEGF_A_UP.V1_UP	39	-0.400716	-1.5768	0
200	GOMF_SULFUR_COMPOUND_BINDING	69	-0.387348	-1.57753	0
201	MIR4477B	72	-0.360023	-1.57776	0
202	GOBP_REGULATION_OF_HYDROLASE_ACTIVITY	330	-0.299291	-1.5782	0
203	WP_APOPTOSIS_MODULATION_AND_SIGNALING	31	-0.452021	-1.57904	0
204	WP_GASTRIN_SIGNALING_PATHWAY	40	-0.43794	-1.58049	0
205	HP_AUTOIMMUNITY	38	-0.447582	-1.5828	0
206	MARTINEZ_RB1_TARGETS_UP	211	-0.308534	-1.5832	0
207	GOBP_REGULATION_OF_CELL_DEATH	445	-0.281736	-1.58382	0
208	HP_ABNORMAL_LUNG_MORPHOLOGY	242	-0.301582	-1.58427	0
209	JECHLINGER_EPITHELIAL_TO_MESENCHYMAL_TRANSITION_DN	24	-0.45202	-1.58515	0
210	THAKAR_PBMC_INACTIVATED_INFLUENZA_AGE_21_30YO_NONRESPONDER_28DY_DN	22	-0.447307	-1.58528	0
211	RAGHAVACHARI_PLATELET_SPECIFIC_GENES	22	-0.484903	-1.58547	0
212	PAPASPYRIDONOS_UNSTABLE_ATEROSCLEROTIC_PLAQUE_UP	15	-0.565369	-1.58658	0
213	GOBP_POSITIVE_REGULATION_OF_SMALL_GTPASE_MEDIATED_SIGNAL_TRANSDUCTION	21	-0.50792	-1.58698	0
214	GSE21063_WT_VS_NFATC1_KO_3H_ANTI_IGM_STIM_BCELL_UP	50	-0.428205	-1.58726	0
215	GSE339_EX_VIVO_VS_IN_CULTURE_CD4CD8DN_DC_DN	59	-0.384268	-1.58764	0
216	MIR4666A_3P	138	-0.324417	-1.58809	0
217	GOBP_REGULATION_OF_PRODUCTION_OF_MOLECULAR_MEDIATOR_OF_IMMUNE_RESPONSE	35	-0.429906	-1.58836	0
218	GOBP_REGULATION_OF_MYELOID_LEUKOCYTE_DIFFERENTIATION	32	-0.428812	-1.58962	0
219	HP_PNEUMONIA	44	-0.395121	-1.5903	0
220	SUPT16H_TARGET_GENES	416	-0.289845	-1.5904	0
221	GOBP_REGULATION_OF_CELL_DIFFERENTIATION	416	-0.291762	-1.5909	0
222	GSE14769_UNSTIM_VS_360MIN_LPS_BMDM_DN	50	-0.412937	-1.59165	0
223	GOMF_EXOGENOUS_PROTEIN_BINDING	19	-0.500158	-1.59191	0
224	HP_ABNORMAL_CHOROID_MORPHOLOGY	35	-0.43961	-1.59438	0
225	KARLSSON_TGFB1_TARGETS_DN	61	-0.389735	-1.59446	0
226	GSE17186_BLOOD_VS_CORD_BLOOD_CD21HIGH_TRANSITIONAL_BCELL_DN	50	-0.37391	-1.59459	0
227	REACTOME_PLATELET_ACTIVATION_SIGNALING_AND_AGGREGATION	72	-0.362598	-1.59496	0
228	GSE9037_CTRL_VS_LPS_4H_STIM_IRAK4_KO_BMDM_DN	53	-0.416355	-1.59542	0
229	GSE11057_PBMC_VS_MEM_CD4_TCELL_UP	39	-0.426321	-1.59557	0
230	GSE17974_IL4_AND_ANTI_IL12_VS_UNTREATED_72H_ACT_CD4_TCELL_DN	54	-0.39812	-1.59561	0
231	TRAVAGLINI_LUNG_NEUTROPHIL_CELL	102	-0.338786	-1.59675	0
232	GSE3982_NEUTROPHIL_VS_EFF_MEMORY_CD4_TCELL_UP	58	-0.38003	-1.59708	0
233	GSE11961_GERMINAL_CENTER_BCELL_DAY7_VS_PLASMA_CELL_DAY7_DN	51	-0.409088	-1.5972	0
234	GOMF_CALCIUM_ION_BINDING	185	-0.330111	-1.59865	0
235	GOBP_RESPONSE_TO_OXYGEN_CONTAINING_COMPOUND	409	-0.292758	-1.59945	0
236	GOBP_NERVE_DEVELOPMENT	21	-0.4662	-1.59988	0
237	GOBP_PROCESS_UTILIZING_AUTOPHAGIC_MECHANISM	146	-0.329345	-1.60046	0
238	GSE46242_CTRL_VS_EGR2_DELETED_ANERGIC_TH1_CD4_TCELL_UP	53	-0.422239	-1.60051	0
239	GOBP_CELLULAR_RESPONSE_TO_MOLECULE_OF_BACTERIAL_ORIGIN	50	-0.403357	-1.60068	0
240	HP_OSTEOPOROSIS	63	-0.402551	-1.60113	0
241	HP_ABNORMAL_CIRCULATING_PROTEIN_CONCENTRATION	125	-0.339288	-1.60119	0
242	GOBP_MUSCLE_CELL_MIGRATION	31	-0.440148	-1.60157	0
243	GOBP_NEGATIVE_REGULATION_OF_TUMOR_NECROSIS_FACTOR_SUPERFAMILY_CYTOKINE_PRODUCTION	16	-0.579387	-1.6016	0
244	GOCC_SUPRAMOLECULAR_COMPLEX	311	-0.299706	-1.60216	0
245	GOBP_POSITIVE_REGULATION_OF_PROTEIN_CONTAINING_COMPLEX_ASSEMBLY	63	-0.359004	-1.60227	0
246	GSE32034_LY6C_HIGH_VS_LOW_ROSIGLIZATONE_TREATED_MONOCYTE_UP	53	-0.396442	-1.60333	0
247	GSE18791_CTRL_VS_NEWCASTLE_VIRUS_DC_16H_DN	52	-0.397632	-1.60343	0
248	GSE6269_HEALTHY_VS_STAPH_PNEUMO_INF_PBMC_DN	54	-0.391999	-1.60429	0
249	GOBP_REGULATION_OF_PROTEIN_MODIFICATION_PROCESS	394	-0.295099	-1.60483	0
250	HP_ABNORMAL_HAIR_QUANTITY	187	-0.321491	-1.60558	0
251	MIR3679_5P	25	-0.468195	-1.60578	0
252	GSE13484_3H_UNSTIM_VS_YF17D_VACCINE_STIM_PBMC_DN	61	-0.400187	-1.60608	0
253	GOBP_REGULATION_OF_STRIATED_MUSCLE_CELL_DIFFERENTIATION	20	-0.5275	-1.60674	0
254	GSE7460_FOXP3_MUT_VS_WT_ACT_TCONV_DN	55	-0.384146	-1.60717	0
255	AP1_Q4	77	-0.366357	-1.60849	0
256	TRAVAGLINI_LUNG_BASOPHIL_MAST_1_CELL	85	-0.368927	-1.60901	0
257	GSE39820_CTRL_VS_TGFBETA1_IL6_CD4_TCELL_DN	73	-0.401193	-1.60902	0
258	GOBP_NEGATIVE_REGULATION_OF_PHOSPHORYLATION	98	-0.336235	-1.6096	0
259	GSE3982_MAC_VS_BCELL_UP	71	-0.384485	-1.60964	0
260	GSE19198_CTRL_VS_IL21_TREATED_TCELL_24H_UP	66	-0.403234	-1.61162	0
261	GSE43955_TH0_VS_TGFB_IL6_TH17_ACT_CD4_TCELL_60H_DN	60	-0.388357	-1.61277	0
262	SCHLESINGER_METHYLATED_DE_NOVO_IN_CANCER	28	-0.443794	-1.61343	0
263	GSE36527_CD62L_HIGH_VS_CD62L_LOW_TREG_CD69_NEG_KLRG1_NEG_UP	47	-0.398632	-1.61373	0
264	GSE22432_MULTIPOTENT_PROGENITOR_VS_CDC_UP	54	-0.397298	-1.61411	0
265	HP_GASTROINTESTINAL_DYSMOTILITY	25	-0.450329	-1.61506	0
266	NFY_Q6	62	-0.395197	-1.61515	0
267	GOBP_POSITIVE_REGULATION_OF_GROWTH	63	-0.386601	-1.61536	0
268	GSE1460_DP_THYMOCYTE_VS_NAIVE_CD4_TCELL_CORD_BLOOD_DN	52	-0.393123	-1.61577	0
269	HU_FETAL_RETINA_BLOOD	91	-0.353032	-1.61604	0
270	HECKER_IFNB1_TARGETS	23	-0.46952	-1.61721	0
271	KEGG_MELANOMA	17	-0.515943	-1.6173	0
272	GOBP_POSITIVE_REGULATION_OF_CELL_CELL_ADHESION	67	-0.374029	-1.61746	0
273	GSE34006_WT_VS_A2AR_KO_TREG_DN	63	-0.384734	-1.618	0
274	RODRIGUES_DCC_TARGETS_DN	43	-0.396991	-1.61856	0
275	GOBP_NEGATIVE_REGULATION_OF_CELLULAR_RESPONSE_TO_GROWTH_FACTOR_STIMULUS	32	-0.465917	-1.61861	0
276	GOBP_DEVELOPMENTAL_GROWTH	150	-0.328326	-1.61906	0
277	GOBP_MYELOID_LEUKOCYTE_MEDIATED_IMMUNITY	141	-0.342435	-1.61908	0
278	CROONQUIST_NRAS_VS_STROMAL_STIMULATION_DN	49	-0.415415	-1.61924	0
279	GSE7764_NKCELL_VS_SPLENOCYTE_UP	51	-0.408243	-1.61978	0
280	CUI_TCF21_TARGETS_2_UP	164	-0.325132	-1.61991	0
281	MODULE_99	79	-0.36636	-1.62014	0
282	MIR95_5P	168	-0.33259	-1.62022	0
283	GOBP_DIVALENT_INORGANIC_CATION_HOMEOSTASIS	99	-0.34919	-1.62038	0
284	GSE23321_CD8_STEM_CELL_MEMORY_VS_EFFECTOR_MEMORY_CD8_TCELL_DN	61	-0.389162	-1.62077	0
285	HP_PES_PLANUS	86	-0.360775	-1.62206	0
286	GSE24972_MARGINAL_ZONE_BCELL_VS_FOLLICULAR_BCELL_IRF8_KO_UP	49	-0.404156	-1.6221	0
287	GSE21360_NAIVE_VS_QUATERNARY_MEMORY_CD8_TCELL_UP	56	-0.389155	-1.62248	0
288	GOBP_POSITIVE_REGULATION_OF_PROTEIN_METABOLIC_PROCESS	395	-0.302487	-1.62262	0
289	MIR367_3P	111	-0.357328	-1.6228	0
290	MARTORIATI_MDM4_TARGETS_NEUROEPITHELIUM_UP	55	-0.377256	-1.62283	0
291	MIR4742_3P	54	-0.411232	-1.62308	0
292	MIR363_3P	111	-0.357328	-1.62324	0
293	GOBP_REGULATION_OF_NITRIC_OXIDE_METABOLIC_PROCESS	18	-0.535448	-1.62379	0
294	GOBP_REGULATION_OF_VASCULAR_ASSOCIATED_SMOOTH_MUSCLE_CELL_PROLIFERATION	25	-0.453148	-1.6245	0
295	DAZARD_RESPONSE_TO_UV_NHEK_DN	71	-0.381757	-1.62486	0
296	GSE22886_NAIVE_VS_IGG_IGA_MEMORY_BCELL_DN	67	-0.406592	-1.62536	0
297	GOBP_OUTFLOW_TRACT_MORPHOGENESIS	22	-0.473111	-1.62566	0
298	GOBP_IMMUNE_SYSTEM_DEVELOPMENT	262	-0.313303	-1.62615	0
299	GSE5589_LPS_VS_LPS_AND_IL10_STIM_MACROPHAGE_180MIN_DN	61	-0.400105	-1.6264	0
300	GSE46606_DAY1_VS_DAY3_CD40L_IL2_IL5_STIMULATED_IRF4_KO_BCELL_UP	41	-0.41461	-1.62707	0
301	WP_NONGENOMIC_ACTIONS_OF_125_DIHYDROXYVITAMIN_D3	18	-0.52812	-1.62755	0
302	HP_ABNORMALITY_OF_DENTAL_ERUPTION	63	-0.399513	-1.62805	0
303	GOBP_SENSORY_ORGAN_MORPHOGENESIS	60	-0.39648	-1.62852	0
304	GOBP_CELL_POPULATION_PROLIFERATION	500	-0.295357	-1.62933	0
305	GSE22886_NAIVE_TCELL_VS_NKCELL_DN	51	-0.401245	-1.6299	0
306	GOBP_RESPONSE_TO_ABIOTIC_STIMULUS	313	-0.309952	-1.63081	0
307	HP_FEVER	74	-0.379574	-1.63095	0
308	MANNE_COVID19_NONICU_VS_HEALTHY_DONOR_PLATELETS_DN	50	-0.409938	-1.63175	0
309	GOBP_REGULATION_OF_OXIDATIVE_STRESS_INDUCED_CELL_DEATH	22	-0.480516	-1.63175	0
310	GSE7852_LN_VS_THYMUS_TREG_UP	59	-0.396763	-1.63255	0
311	GOBP_LEUKOCYTE_DIFFERENTIATION	147	-0.338461	-1.63312	0
312	YOSHIMURA_MAPK8_TARGETS_DN	118	-0.33968	-1.63383	0
313	BLALOCK_ALZHEIMERS_DISEASE_UP	490	-0.292809	-1.63388	0
314	GSE43863_TFH_VS_LY6C_LOW_CXCR5NEG_EFFECTOR_CD4_TCELL_DN	57	-0.395428	-1.63421	0
315	GSE17974_IL4_AND_ANTI_IL12_VS_UNTREATED_48H_ACT_CD4_TCELL_DN	39	-0.430823	-1.63465	0
316	DORN_ADENOVIRUS_INFECTION_24HR_DN	21	-0.531811	-1.63521	0
317	GOBP_REGULATION_OF_LEUKOCYTE_DIFFERENTIATION	84	-0.379842	-1.63562	0
318	SHETH_LIVER_CANCER_VS_TXNIP_LOSS_PAM3	26	-0.466929	-1.63572	0
319	GOBP_POSITIVE_REGULATION_OF_APOPTOTIC_SIGNALING_PATHWAY	36	-0.438451	-1.63582	0
320	GOBP_POSITIVE_REGULATION_OF_PROTEIN_KINASE_ACTIVITY	139	-0.345489	-1.63584	0
321	GOBP_ORGAN_GROWTH	42	-0.438675	-1.63592	0
322	MIR338_5P	101	-0.363008	-1.63594	0
323	GSE7509_UNSTIM_VS_IFNA_STIM_IMMATURE_DC_DN	45	-0.421344	-1.63611	0
324	DURANTE_ADULT_OLFACTORY_NEUROEPITHELIUM_DENDRITIC_CELLS	27	-0.481655	-1.63625	0
325	GSE22886_NAIVE_CD4_TCELL_VS_DC_DN	69	-0.379075	-1.63654	0
326	GOCC_SECRETORY_GRANULE_MEMBRANE	81	-0.370779	-1.63654	0
327	AIZARANI_LIVER_C14_HEPATOCYTES_2	46	-0.423686	-1.6372	0
328	HP_ABNORMALITY_OF_SKIN_PHYSIOLOGY	107	-0.370474	-1.63726	0
329	GSE3982_MAST_CELL_VS_TH1_UP	43	-0.420696	-1.6373	0
330	JAATINEN_HEMATOPOIETIC_STEM_CELL_UP	87	-0.343212	-1.63742	0
331	MIR144_3P	137	-0.346149	-1.63764	0
332	GOBP_BIOLOGICAL_PROCESS_INVOLVED_IN_INTERACTION_WITH_SYMBIONT	20	-0.506045	-1.63767	0
333	SANSOM_APC_TARGETS_DN	84	-0.362278	-1.63851	0
334	GSE4590_SMALL_VS_LARGE_PRE_BCELL_DN	50	-0.401283	-1.63855	0
335	GSE25087_TREG_VS_TCONV_ADULT_UP	57	-0.390394	-1.63895	0
336	HP_ABNORMALITY_OF_THE_MAXILLA	45	-0.39787	-1.63917	0
337	GSE7460_WT_VS_FOXP3_HET_ACT_WITH_TGFB_TCONV_DN	45	-0.413946	-1.64014	0
338	PIT1_Q6	63	-0.390109	-1.64039	0
339	HARALAMBIEVA_PBMC_FLUARIX_AGE_50_74YO_CORR_WITH_28D_MEM_B_CELL_RESPONSE_AT_28DY_POSITIVE	368	-0.303536	-1.64059	0
340	SEITZ_NEOPLASTIC_TRANSFORMATION_BY_8P_DELETION_UP	26	-0.505668	-1.64077	0
341	GSE24574_BCL6_HIGH_TFH_VS_TCONV_CD4_TCELL_UP	50	-0.394595	-1.64107	0
342	GOBP_REGULATION_OF_SUPRAMOLECULAR_FIBER_ORGANIZATION	115	-0.346988	-1.64113	0
343	GSE14415_INDUCED_TREG_VS_FAILED_INDUCED_TREG_DN	59	-0.391934	-1.64264	0
344	CEBP_Q2	46	-0.409234	-1.64317	0
345	UDAYAKUMAR_MED1_TARGETS_DN	84	-0.373703	-1.64364	0
346	GOBP_POSITIVE_REGULATION_OF_DEVELOPMENTAL_PROCESS	332	-0.305977	-1.64378	0
347	BLANCO_MELO_COVID19_SARS_COV_2_INFECTION_A594_ACE2_EXPRESSING_CELLS_RUXOLITINIB_DN	20	-0.509818	-1.64424	0
348	GSE19888_ADENOSINE_A3R_ACT_VS_TCELL_MEMBRANES_ACT_IN_MAST_CELL_UP	70	-0.375791	-1.64425	0
349	GSE12366_NAIVE_VS_MEMORY_BCELL_DN	52	-0.389288	-1.64427	0
350	GSE24142_EARLY_THYMIC_PROGENITOR_VS_DN2_THYMOCYTE_UP	51	-0.403628	-1.64434	0
351	GOBP_REGULATION_OF_PEPTIDASE_ACTIVITY	118	-0.370989	-1.64444	0
352	GSE15659_NONSUPPRESSIVE_TCELL_VS_ACTIVATED_TREG_DN	29	-0.457113	-1.64466	0
353	MODULE_255	111	-0.351606	-1.64468	0
354	LAKE_ADULT_KIDNEY_C27_VASCULAR_SMOOTH_MUSCLE_CELLS_AND_PERICYTES	58	-0.411141	-1.64479	0
355	RUBENSTEIN_SKELETAL_MUSCLE_NK_CELLS	59	-0.393078	-1.64486	0
356	SENGUPTA_NASOPHARYNGEAL_CARCINOMA_WITH_LMP1_UP	106	-0.359409	-1.64494	0
357	GSE13411_IGM_VS_SWITCHED_MEMORY_BCELL_UP	41	-0.414618	-1.64556	0
358	DESCARTES_FETAL_CEREBELLUM_MICROGLIA	102	-0.350398	-1.64607	0
359	GSE369_PRE_VS_POST_IL6_INJECTION_SOCS3_KO_LIVER_UP	56	-0.41375	-1.64615	0
360	KEGG_REGULATION_OF_ACTIN_CYTOSKELETON	65	-0.384307	-1.64629	0
361	GSE2770_UNTREATED_VS_IL12_TREATED_ACT_CD4_TCELL_6H_UP	41	-0.423008	-1.64721	0
362	ALCALAY_AML_BY_NPM1_LOCALIZATION_UP	40	-0.436824	-1.64797	0
363	HP_VOMITING	72	-0.371405	-1.64851	0
364	GOMF_OXIDOREDUCTASE_ACTIVITY_ACTING_ON_PAIRED_DONORS_WITH_INCORPORATION_OR_ REDUCTION_OF_MOLECULAR_OXYGEN	25	-0.464694	-1.64896	0
365	GSE17721_0.5H_VS_4H_LPS_BMDC_DN	59	-0.402206	-1.64918	0
366	GOBP_CIRCULATORY_SYSTEM_PROCESS	155	-0.334758	-1.64922	0
367	HP_POSITIONAL_FOOT_DEFORMITY	99	-0.358196	-1.64945	0
368	GSE17974_IL4_AND_ANTI_IL12_VS_UNTREATED_2H_ACT_CD4_TCELL_UP	51	-0.392764	-1.64958	0
369	GSE20500_RETINOIC_ACID_VS_RARA_ANTAGONIST_TREATED_CD4_TCELL_DN	58	-0.404995	-1.64985	0
370	CREIGHTON_ENDOCRINE_THERAPY_RESISTANCE_1	179	-0.325913	-1.64992	0
371	HP_ABNORMAL_THROMBOCYTE_MORPHOLOGY	100	-0.352231	-1.65024	0
372	GOBP_REGULATION_OF_MAP_KINASE_ACTIVITY	87	-0.372778	-1.65029	0
373	GSE26290_CTRL_VS_AKT_INHIBITOR_TREATED_ANTI_CD3_AND_IL2_STIM_CD8_TCELL_UP	45	-0.390495	-1.65098	0
374	MIR150_3P	38	-0.458475	-1.65101	0
375	GCM2_TARGET_GENES	393	-0.296929	-1.65117	0
376	GSE5542_UNTREATED_VS_IFNG_TREATED_EPITHELIAL_CELLS_24H_UP	75	-0.37172	-1.65152	0
377	GSE12392_WT_VS_IFNB_KO_CD8A_POS_SPLEEN_DC_DN	50	-0.441387	-1.65174	0
378	GOBP_LEUKOCYTE_MEDIATED_IMMUNITY	193	-0.340229	-1.6521	0
379	GSE36078_WT_VS_IL1R_KO_LUNG_DC_AFTER_AD5_INF_UP	55	-0.394726	-1.65247	0
380	GSE45365_HEALTHY_VS_MCMV_INFECTION_CD11B_DC_DN	55	-0.404787	-1.65349	0
381	RIGGI_EWING_SARCOMA_PROGENITOR_UP	125	-0.370805	-1.65349	0
382	GSE3982_DC_VS_MAC_LPS_STIM_DN	66	-0.404016	-1.65387	0
383	GOBP_REGULATION_OF_HORMONE_LEVELS	113	-0.351917	-1.65394	0
384	HP_JOINT_HYPERMOBILITY	91	-0.368019	-1.65474	0
385	GOBP_INTERFERON_BETA_PRODUCTION	17	-0.576079	-1.655	0
386	GSE23308_WT_VS_MINERALCORTICOID_REC_KO_MACROPHAGE_DN	56	-0.413887	-1.65502	0
387	HOSHIDA_LIVER_CANCER_SUBCLASS_S3	58	-0.392285	-1.65517	0
388	GOBP_AMINOGLYCAN_BIOSYNTHETIC_PROCESS	36	-0.432273	-1.65555	0
389	HP_HEADACHE	74	-0.392853	-1.65558	0
390	KIM_WT1_TARGETS_DN	162	-0.336333	-1.65559	0
391	GSE6259_FLT3L_INDUCED_DEC205_POS_DC_VS_BCELL_UP	50	-0.406078	-1.6562	0
392	GOBP_NEGATIVE_REGULATION_OF_INTRACELLULAR_SIGNAL_TRANSDUCTION	153	-0.332091	-1.65634	0
393	GSE19941_UNSTIM_VS_LPS_AND_IL10_STIM_IL10_KO_MACROPHAGE_UP	59	-0.405115	-1.65638	0
394	KRIGE_RESPONSE_TO_TOSEDOSTAT_6HR_UP	276	-0.304681	-1.65646	0
395	LEE_LIVER_CANCER_MYC_E2F1_DN	16	-0.545775	-1.65697	0
396	GSE19941_LPS_VS_LPS_AND_IL10_STIM_IL10_KO_MACROPHAGE_DN	43	-0.417982	-1.65714	0
397	SABATES_COLORECTAL_ADENOMA_DN	68	-0.385803	-1.65717	0
398	GSE41867_DAY6_VS_DAY8_LCMV_ARMSTRONG_EFFECTOR_CD8_TCELL_UP	55	-0.410939	-1.65723	0
399	HP_ABNORMAL_URINE_CYTOLOGY	35	-0.457978	-1.65751	0
400	GSE13522_CTRL_VS_T_CRUZI_G_STRAIN_INF_SKIN_UP	55	-0.397486	-1.65764	0
401	HP_ABNORMALITY_OF_FINGER	273	-0.316522	-1.65791	0
402	CUI_DEVELOPING_HEART_VALVAR_ENDOTHELIAL_CELL	56	-0.412204	-1.65865	0
403	HNF3ALPHA_Q6	52	-0.410221	-1.65872	0
404	HP_ABNORMALITY_OF_PRIMARY_TEETH	20	-0.51236	-1.6592	0
405	GSE9946_IMMATURE_VS_PROSTAGLANDINE2_TREATED_MATURE_DC_UP	31	-0.472948	-1.65936	0
406	GSE36826_WT_VS_IL1R_KO_SKIN_DN	70	-0.377992	-1.6601	0
407	GOBP_OSTEOCLAST_DIFFERENTIATION	26	-0.513651	-1.66012	0
408	MIR92A_3P	127	-0.356221	-1.66028	0
409	YAO_TEMPORAL_RESPONSE_TO_PROGESTERONE_CLUSTER_1	27	-0.487619	-1.66068	0
410	REACTOME_SIGNALING_BY_RECEPTOR_TYROSINE_KINASES	151	-0.348045	-1.66152	0
411	ATXN7L3_TARGET_GENES	92	-0.361853	-1.66158	0
412	HP_ABNORMALITY_IRIS_MORPHOLOGY	91	-0.354619	-1.6625	0
413	HP_ABNORMALITY_OF_CARDIOVASCULAR_SYSTEM_ELECTROPHYSIOLOGY	97	-0.363268	-1.66258	0
414	GSE17721_CPG_VS_GARDIQUIMOD_12H_BMDC_UP	51	-0.403491	-1.66269	0
415	BRUINS_UVC_RESPONSE_VIA_TP53_GROUP_B	187	-0.337959	-1.66286	0
416	CYCLIN_D1_UP.V1_DN	53	-0.408257	-1.66287	0
417	GSE7852_LN_VS_FAT_TCONV_DN	76	-0.368627	-1.66294	0
418	REACTOME_NEUTROPHIL_DEGRANULATION	125	-0.34845	-1.66385	0
419	LIANG_SILENCED_BY_METHYLATION_2	18	-0.548598	-1.66431	0
420	TIEN_INTESTINE_PROBIOTICS_24HR_DN	67	-0.391071	-1.6646	0
421	GOBP_NEGATIVE_REGULATION_OF_MOLECULAR_FUNCTION	275	-0.322895	-1.66553	0
422	GSE33513_TCF7_KO_VS_HET_EARLY_THYMIC_PROGENITOR_UP	54	-0.431855	-1.66564	0
423	DODD_NASOPHARYNGEAL_CARCINOMA_UP	370	-0.308525	-1.66566	0
424	GSE40685_TREG_VS_FOXP3_KO_TREG_PRECURSOR_UP	55	-0.395822	-1.666	0
425	GOCC_VESICLE_MEMBRANE	213	-0.326112	-1.66675	0
426	THAKAR_PBMC_INACTIVATED_INFLUENZA_AGE_21_30YO_RESPONDERS_28DY_UP	114	-0.349721	-1.66747	0
427	TGGAAA_NFAT_Q4_01	507	-0.304839	-1.66753	0
428	GRAESSMANN_APOPTOSIS_BY_DOXORUBICIN_UP	353	-0.311024	-1.66884	0
429	GSE3982_BASOPHIL_VS_NKCELL_UP	55	-0.430235	-1.66888	0
430	GOCC_COATED_VESICLE	84	-0.366772	-1.66919	0
431	GSE3982_EOSINOPHIL_VS_MAC_DN	53	-0.422256	-1.66945	0
432	GSE6269_FLU_VS_E_COLI_INF_PBMC_UP	48	-0.391674	-1.66986	0
433	GSE9650_GP33_VS_GP276_LCMV_SPECIFIC_EXHAUSTED_CD8_TCELL_UP	58	-0.427196	-1.67032	0
434	GOBP_POSITIVE_REGULATION_OF_HORMONE_SECRETION	25	-0.493294	-1.67057	0
435	GSE34156_UNTREATED_VS_24H_TLR1_TLR2_LIGAND_TREATED_MONOCYTE_UP	46	-0.397417	-1.67065	0
436	EN1_01	20	-0.5297	-1.67109	0
437	MIR5580_3P	60	-0.390173	-1.67173	0
438	GOBP_CELLULAR_RESPONSE_TO_EXTERNAL_STIMULUS	99	-0.378204	-1.67173	0
439	HP_ABNORMAL_JOINT_MORPHOLOGY	259	-0.317259	-1.67174	0
440	GSE46143_CTRL_VS_LMP2A_TRANSDUCED_CD10_POS_GC_BCELL_DN	49	-0.421131	-1.67246	0
441	ENK_UV_RESPONSE_KERATINOCYTE_UP	167	-0.329194	-1.67253	0
442	PKCA_DN.V1_DN	40	-0.434167	-1.67301	0
443	GSE21360_PRIMARY_VS_QUATERNARY_MEMORY_CD8_TCELL_UP	65	-0.381038	-1.67317	0
444	GSE40274_FOXP3_VS_FOXP3_AND_XBP1_TRANSDUCED_ACTIVATED_CD4_TCELL_UP	41	-0.422517	-1.67323	0
445	HP_GOWERS_SIGN	16	-0.533267	-1.67354	0
446	GSE30971_CTRL_VS_LPS_STIM_MACROPHAGE_WBP7_KO_2H_UP	51	-0.423306	-1.67363	0
447	GSE30083_SP2_VS_SP3_THYMOCYTE_DN	51	-0.387711	-1.67371	0
448	PROVENZANI_METASTASIS_DN	51	-0.434748	-1.67388	0
449	GOBP_REGULATION_OF_ENDOCYTOSIS	54	-0.419927	-1.67402	0
450	ENK_UV_RESPONSE_EPIDERMIS_DN	157	-0.324661	-1.67427	0
451	GOBP_ACTIN_FILAMENT_BASED_PROCESS	240	-0.327946	-1.67454	0
452	HELLER_HDAC_TARGETS_SILENCED_BY_METHYLATION_UP	141	-0.334508	-1.67468	0
453	HP_ABNORMALITY_OF_SKIN_PIGMENTATION	99	-0.365505	-1.67558	0
454	GOBP_REGULATION_OF_BINDING	97	-0.35645	-1.67567	0
455	IVANOVA_HEMATOPOIESIS_STEM_CELL_LONG_TERM	58	-0.40083	-1.67691	0
456	MODULE_174	30	-0.507177	-1.67724	0
457	GSE360_L_MAJOR_VS_T_GONDII_MAC_UP	50	-0.413316	-1.67744	0
458	HP_INCREASED_CIRCULATING_ANTIBODY_LEVEL	26	-0.492875	-1.6782	0
459	GOMF_SMAD_BINDING	26	-0.489699	-1.67842	0
460	BUSSLINGER_GASTRIC_ISTHMUS_CELLS	160	-0.34107	-1.67845	0
461	GOBP_MESENCHYMAL_CELL_DIFFERENTIATION	58	-0.414677	-1.67854	0
462	BLALOCK_ALZHEIMERS_DISEASE_INCIPIENT_UP	101	-0.364942	-1.67874	0
463	GSE43955_10H_VS_30H_ACT_CD4_TCELL_UP	55	-0.439964	-1.67974	0
464	GSE12392_IFNAR_KO_VS_IFNB_KO_CD8_NEG_SPLEEN_DC_UP	54	-0.40422	-1.68027	0
465	GOBP_OSSIFICATION	127	-0.353561	-1.6815	0
466	GSE1791_CTRL_VS_NEUROMEDINU_IN_T_CELL_LINE_6H_DN	52	-0.401305	-1.68158	0
467	KENNY_CTNNB1_TARGETS_DN	19	-0.554153	-1.68159	0
468	GSE14415_NATURAL_TREG_VS_FOXP3_KO_NATURAL_TREG_DN	41	-0.466768	-1.6816	0
469	GSE15767_MED_VS_SCS_MAC_LN_UP	49	-0.411561	-1.68194	0
470	TTANTCA_UNKNOWN	223	-0.327829	-1.68219	0
471	HP_LYMPHEDEMA	16	-0.557191	-1.68235	0
472	HP_ABNORMAL_UVEA_MORPHOLOGY	115	-0.368449	-1.6836	0
473	LAKE_ADULT_KIDNEY_C2_PODOCYTES	64	-0.372105	-1.68365	0
474	GSE40666_UNTREATED_VS_IFNA_STIM_STAT4_KO_EFFECTOR_CD8_TCELL_90MIN_UP	62	-0.394103	-1.68437	0
475	TFEB_TARGET_GENES	318	-0.318698	-1.68501	0
476	GOBP_NEGATIVE_REGULATION_OF_CELL_POPULATION_PROLIFERATION	180	-0.350857	-1.68503	0
477	GSE37301_HEMATOPOIETIC_STEM_CELL_VS_COMMON_LYMPHOID_PROGENITOR_UP	58	-0.399336	-1.6851	0
478	GSE40274_CTRL_VS_FOXP3_AND_XBP1_TRANSDUCED_ACTIVATED_CD4_TCELL_DN	41	-0.445355	-1.68525	0
479	GOBP_EMBRYONIC_SKELETAL_SYSTEM_DEVELOPMENT	36	-0.449284	-1.68526	0
480	HP_LIMITED_ELBOW_MOVEMENT	37	-0.442144	-1.68572	0
481	GSE17721_CPG_VS_GARDIQUIMOD_6H_BMDC_UP	57	-0.424593	-1.68594	0
482	HP_ABNORMALITY_OF_REFRACTION	118	-0.364698	-1.68632	0
483	GOBP_REGULATION_OF_MAPK_CASCADE	182	-0.341439	-1.68721	0
484	HP_PREMATURE_LOSS_OF_TEETH	16	-0.529561	-1.68742	0
485	GOBP_MYELOID_LEUKOCYTE_ACTIVATION	165	-0.329279	-1.68856	0
486	GSE40666_UNTREATED_VS_IFNA_STIM_EFFECTOR_CD8_TCELL_90MIN_UP	73	-0.40123	-1.68857	0
487	CEBPB_01	65	-0.424741	-1.68914	0
488	GOCC_ENDOSOME_MEMBRANE	133	-0.346087	-1.6896	0
489	GSE8835_CD4_VS_CD8_TCELL_DN	45	-0.406242	-1.68976	0
490	LTE2_UP.V1_DN	63	-0.395243	-1.68979	0
491	CEBPA_01	50	-0.450563	-1.6898	0
492	LI_AMPLIFIED_IN_LUNG_CANCER	69	-0.388507	-1.68983	0
493	HP_EXERTIONAL_DYSPNEA	36	-0.43446	-1.68995	0
494	HP_ABNORMAL_VASCULAR_MORPHOLOGY	203	-0.334619	-1.69053	0
495	GSE2770_TGFB_AND_IL4_VS_IL12_TREATED_ACT_CD4_TCELL_2H_DN	54	-0.429227	-1.691	0
496	GSE22313_HEALTHY_VS_SLE_MOUSE_CD4_TCELL_UP	60	-0.404272	-1.69166	0
497	GSE5503_PLN_DC_VS_SPLEEN_DC_ACTIVATED_ALLOGENIC_TCELL_DN	54	-0.403088	-1.69168	0
498	ONDER_CDH1_TARGETS_1_UP	43	-0.452999	-1.6918	0
499	GOBP_PROTEIN_PHOSPHORYLATION	395	-0.311461	-1.69183	0
500	GOBP_CARDIOCYTE_DIFFERENTIATION	42	-0.4352	-1.69237	0
501	GOMF_PROTEIN_CONTAINING_COMPLEX_BINDING	336	-0.311466	-1.69238	0
502	GOBP_ENDOTHELIAL_CELL_DEVELOPMENT	17	-0.555966	-1.69246	0
503	GSE22196_HEALTHY_VS_OBESE_MOUSE_SKIN_GAMMADELTA_TCELL_DN	84	-0.396713	-1.69271	0
504	GOCC_TRANS_GOLGI_NETWORK	68	-0.381265	-1.69299	0
505	HP_PECTUS_EXCAVATUM	77	-0.39507	-1.69304	0
506	RAF_UP.V1_UP	67	-0.418642	-1.69321	0
507	GSE360_L_MAJOR_VS_B_MALAYI_LOW_DOSE_MAC_UP	57	-0.402358	-1.69358	0
508	GOBP_FEMALE_SEX_DIFFERENTIATION	34	-0.441367	-1.69359	0
509	GSE42021_TCONV_PLN_VS_TREG_PRECURSORS_THYMUS_DN	64	-0.399672	-1.6943	0
510	HP_CONSTITUTIONAL_SYMPTOM	249	-0.327102	-1.69431	0
511	HP_RECURRENT_FEVER	16	-0.555451	-1.69484	0
512	DIAZ_CHRONIC_MEYLOGENOUS_LEUKEMIA_DN	38	-0.431166	-1.69494	0
513	ALK_DN.V1_UP	32	-0.463196	-1.69503	0
514	GSE22886_CD8_TCELL_VS_BCELL_NAIVE_UP	64	-0.406352	-1.69539	0
515	NAKAYA_MONOCYTE_FLUARIX_FLUVIRIN_AGE_18_50YO_7DY_DN	32	-0.443803	-1.6954	0
516	CUI_DEVELOPING_HEART_C4_ENDOTHELIAL_CELL	50	-0.427527	-1.69554	0
517	GSE21670_UNTREATED_VS_IL6_TREATED_STAT3_KO_CD4_TCELL_UP	59	-0.418446	-1.69606	0
518	AR_Q2	27	-0.483345	-1.69623	0
519	GSE16522_MEMORY_VS_NAIVE_ANTI_CD3CD28_STIM_CD8_TCELL_UP	54	-0.428735	-1.69672	0
520	GSE9006_TYPE_1_DIABETES_AT_DX_VS_1MONTH_POST_DX_PBMC_DN	55	-0.412262	-1.69728	0
521	AMIT_EGF_RESPONSE_60_HELA	18	-0.536742	-1.6973	0
522	HP_BROAD_LONG_BONES	37	-0.451633	-1.69815	0
523	GOMF_TUMOR_NECROSIS_FACTOR_RECEPTOR_SUPERFAMILY_BINDING	16	-0.532262	-1.6982	0
524	HP_ABNORMAL_STERNUM_MORPHOLOGY	117	-0.382971	-1.69828	0
525	GSE1791_CTRL_VS_NEUROMEDINU_IN_T_CELL_LINE_6H_UP	62	-0.420485	-1.69877	0
526	GOBP_CELL_ACTIVATION_INVOLVED_IN_IMMUNE_RESPONSE	175	-0.336635	-1.69948	0
527	GSE22196_HEALTHY_VS_OBESE_MOUSE_SKIN_GAMMADELTA_TCELL_UP	54	-0.426878	-1.6995	0
528	FAN_EMBRYONIC_CTX_BIG_GROUPS_MICROGLIA	105	-0.371688	-1.69998	0
529	HOWARD_PBMC_INACT_MONOV_INFLUENZA_A_INDONESIA_05_2005_H5N1_AGE_19_39YO_AS03_ ADJUVANT_VS_BUFFER_1DY_UP	103	-0.380835	-1.70119	0
530	GOBP_REGULATION_OF_PROTEIN_BINDING	56	-0.433066	-1.70218	0
531	GSE25085_FETAL_BM_VS_ADULT_BM_SP4_THYMIC_IMPLANT_DN	57	-0.415047	-1.70222	0
532	GSE17721_POLYIC_VS_CPG_16H_BMDC_UP	44	-0.440348	-1.7024	0
533	GSE34156_UNTREATED_VS_24H_NOD2_LIGAND_TREATED_MONOCYTE_DN	61	-0.41332	-1.70306	0
534	GSE11057_NAIVE_VS_CENT_MEMORY_CD4_TCELL_DN	69	-0.417467	-1.70339	0
535	GSE14000_UNSTIM_VS_16H_LPS_DC_DN	62	-0.422126	-1.70384	0
536	UBN1_TARGET_GENES	444	-0.310606	-1.70394	0
537	HP_ABNORMALITY_OF_THE_DENTITION	215	-0.333394	-1.7041	0
538	GSE25087_TREG_VS_TCONV_FETUS_UP	54	-0.394476	-1.70426	0
539	GSE360_L_MAJOR_VS_B_MALAYI_LOW_DOSE_DC_UP	49	-0.427279	-1.70428	0
540	GOBP_REGULATION_OF_HEMOPOIESIS	109	-0.370621	-1.70431	0
541	HMGA1_TARGET_GENES	168	-0.339271	-1.70433	0
542	GSE24081_CONTROLLER_VS_PROGRESSOR_HIV_SPECIFIC_CD8_TCELL_DN	50	-0.42537	-1.70444	0
543	GOBP_POSITIVE_REGULATION_OF_PEPTIDYL_TYROSINE_PHOSPHORYLATION	50	-0.429798	-1.70447	0
544	GOBP_HEART_GROWTH	23	-0.476759	-1.70479	0
545	AP1_C	87	-0.386128	-1.70514	0
546	GSE36888_STAT5_AB_KNOCKIN_VS_WT_TCELL_IL2_TREATED_2H_UP	60	-0.417884	-1.70541	0
547	GSE7400_CTRL_VS_CSF3_IN_VIVO_TREATED_PBMC_DN	47	-0.41791	-1.70553	0
548	ZHANG_RESPONSE_TO_IKK_INHIBITOR_AND_TNF_DN	31	-0.452949	-1.70589	0
549	GSE24634_TREG_VS_TCONV_POST_DAY10_IL4_CONVERSION_DN	59	-0.416738	-1.70616	0
550	BACH2_01	83	-0.382551	-1.70676	0
551	ZNF512_TARGET_GENES	98	-0.351471	-1.7068	0
552	GOBP_MUSCLE_SYSTEM_PROCESS	118	-0.371016	-1.70682	0
553	GSE34217_MIR17_92_OVEREXPRESS_VS_WT_ACT_CD8_TCELL_UP	38	-0.467096	-1.70726	0
554	GSE17580_UNINFECTED_VS_S_MANSONI_INF_TREG_DN	65	-0.381776	-1.70754	0
555	KRIEG_HYPOXIA_NOT_VIA_KDM3A	248	-0.337457	-1.70777	0
556	GOBP_CELLULAR_RESPONSE_TO_NUTRIENT	17	-0.587694	-1.70796	0
557	JOSEPH_RESPONSE_TO_SODIUM_BUTYRATE_DN	18	-0.532983	-1.70835	0
558	CHANDRAN_METASTASIS_DN	100	-0.388888	-1.70851	0
559	CUI_DEVELOPING_HEART_TRABECULAR_ATRIAL_CARDIOMYOCYTE	66	-0.41	-1.70888	0
560	CEBPDELTA_Q6	62	-0.403834	-1.70916	0
561	GSE3982_NEUTROPHIL_VS_TH1_UP	44	-0.435975	-1.70925	0
562	WP_ARRHYTHMOGENIC_RIGHT_VENTRICULAR_CARDIOMYOPATHY	21	-0.511335	-1.7095	0
563	GSE360_L_DONOVANI_VS_B_MALAYI_HIGH_DOSE_MAC_UP	56	-0.423073	-1.70968	0
564	MODULE_317	110	-0.353144	-1.70968	0
565	GSE45739_UNSTIM_VS_ACD3_ACD28_STIM_WT_CD4_TCELL_UP	56	-0.416988	-1.70988	0
566	KAECH_NAIVE_VS_DAY15_EFF_CD8_TCELL_DN	72	-0.393775	-1.71011	0
567	GSE16697_CD4_TCELL_VS_TFH_CD4_TCELL_UP	50	-0.423813	-1.71022	0
568	GSE21670_STAT3_KO_VS_WT_CD4_TCELL_TGFB_IL6_TREATED_DN	62	-0.410505	-1.71089	0
569	MIR624_5P	27	-0.497241	-1.71176	0
570	GSE3982_CTRL_VS_LPS_4H_MAC_DN	63	-0.410343	-1.71274	0
571	GSE22935_UNSTIM_VS_24H_MBOVIS_BCG_STIM_MYD88_KO_MACROPHAGE_UP	63	-0.387099	-1.7135	0
572	MIR340_5P	191	-0.337996	-1.71379	0
573	GSE37301_MULTIPOTENT_PROGENITOR_VS_CD4_TCELL_DN	60	-0.396317	-1.71383	0
574	GOBP_ANIMAL_ORGAN_REGENERATION	24	-0.524808	-1.71388	0
575	SCHERER_PBMC_YF_VAX_AGE_18_40YO_JOINT_TO_VACCINIA_AND_YELLOW_FEVER_UP	17	-0.578251	-1.71414	0
576	GOBP_NEGATIVE_REGULATION_OF_PROTEOLYSIS	83	-0.396089	-1.71472	0
577	GOBP_POSITIVE_REGULATION_OF_CELL_POPULATION_PROLIFERATION	247	-0.335911	-1.71539	0
578	GOBP_REPRODUCTIVE_SYSTEM_DEVELOPMENT	113	-0.373906	-1.71549	0
579	HP_ABNORMAL_THROMBOSIS	30	-0.489417	-1.71583	0
580	REACTOME_CONSTITUTIVE_SIGNALING_BY_ABERRANT_PI3K_IN_CANCER	15	-0.568699	-1.71584	0
581	KAAB_HEART_ATRIUM_VS_VENTRICLE_UP	95	-0.400161	-1.71588	0
582	GSE41176_UNSTIM_VS_ANTI_IGM_STIM_BCELL_1H_UP	61	-0.404838	-1.7163	0
583	GSE40273_EOS_KO_VS_WT_TREG_UP	58	-0.441844	-1.71715	0
584	GSE18791_UNSTIM_VS_NEWCATSLE_VIRUS_DC_10H_DN	57	-0.436574	-1.71722	0
585	GOBP_EXOCYTOSIS	216	-0.335514	-1.71722	0
586	GOBP_REGULATION_OF_ACTIN_FILAMENT_BUNDLE_ASSEMBLY	29	-0.47823	-1.71889	0
587	HARRIS_BRAIN_CANCER_PROGENITORS	21	-0.522185	-1.71897	0
588	GSE2197_IMMUNOSUPPRESSIVE_DNA_VS_UNTREATED_IN_DC_UP	59	-0.435617	-1.71988	0
589	GOBP_CELL_ADHESION_MEDIATED_BY_INTEGRIN	26	-0.513914	-1.72004	0
590	GSE32128_INOS_DEPENDENT_VS_INOS_INDEPENDENT_ACTIVATED_TCELL_UP	56	-0.422251	-1.72005	0
591	ALFANO_MYC_TARGETS	98	-0.384387	-1.72017	0
592	GOBP_MACROAUTOPHAGY	93	-0.391807	-1.72038	0
593	GSE9988_LPS_VS_LPS_AND_ANTI_TREM1_MONOCYTE_DN	82	-0.392325	-1.72073	0
594	GOBP_NEGATIVE_REGULATION_OF_LOCOMOTION	84	-0.406707	-1.72083	0
595	GSE20715_WT_VS_TLR4_KO_24H_OZONE_LUNG_UP	49	-0.426899	-1.72107	0
596	ZHONG_PFC_MAJOR_TYPES_MICROGLIA	131	-0.355847	-1.72129	0
597	FAN_EMBRYONIC_CTX_BRAIN_NAIVE_LIKE_T_CELL	39	-0.466057	-1.72147	0
598	HP_PAIN	169	-0.344275	-1.72156	0
599	GSE7348_UNSTIM_VS_TOLERIZED_AND_LPS_STIM_MACROPHAGE_DN	45	-0.42361	-1.72317	0
600	GSE35685_CD34POS_CD38NEG_VS_CD34POS_CD10POS_BONE_MARROW_DN	71	-0.412771	-1.72344	0
601	GSE9037_WT_VS_IRAK4_KO_LPS_1H_STIM_BMDM_UP	32	-0.465163	-1.72348	0
602	GSE3982_MAC_VS_NKCELL_UP	59	-0.410601	-1.72359	0
603	SESTO_RESPONSE_TO_UV_C2	17	-0.556283	-1.72367	0
604	REACTOME_INTERLEUKIN_4_AND_INTERLEUKIN_13_SIGNALING	28	-0.490454	-1.72371	0
605	GSE7460_CTRL_VS_TGFB_TREATED_ACT_FOXP3_HET_TCONV_DN	59	-0.395658	-1.72372	0
606	GSE29949_MICROGLIA_BRAIN_VS_MONOCYTE_BONE_MARROW_UP	46	-0.443493	-1.72373	0
607	GOBP_NEGATIVE_REGULATION_OF_PROTEIN_BINDING	25	-0.510686	-1.7238	0
608	GOBP_REGULATION_OF_APOPTOTIC_SIGNALING_PATHWAY	97	-0.378606	-1.72406	0
609	GOBP_MAPK_CASCADE	227	-0.338848	-1.72411	0
610	DEURIG_T_CELL_PROLYMPHOCYTIC_LEUKEMIA_DN	91	-0.37404	-1.72431	0
611	LAKE_ADULT_KIDNEY_C18_COLLECTING_DUCT_PRINCIPAL_CELLS_MEDULLA	117	-0.375558	-1.72448	0
612	UZONYI_RESPONSE_TO_LEUKOTRIENE_AND_THROMBIN	16	-0.579829	-1.72451	0
613	GSE360_T_GONDII_VS_M_TUBERCULOSIS_MAC_DN	50	-0.422207	-1.72472	0
614	GOBP_RHO_PROTEIN_SIGNAL_TRANSDUCTION	42	-0.439978	-1.72486	0
615	GSE37533_UNTREATED_VS_PIOGLIZATONE_TREATED_CD4_TCELL_FOXP3_TRASDUCED_CD4_TCELL_DN	34	-0.462181	-1.72513	0
616	GSE18791_CTRL_VS_NEWCASTLE_VIRUS_DC_10H_DN	52	-0.42276	-1.72513	0
617	ROSS_AML_WITH_CBFB_MYH11_FUSION	15	-0.585292	-1.72515	0
618	GSE26928_NAIVE_VS_EFF_MEMORY_CD4_TCELL_DN	71	-0.422225	-1.72532	0
619	GSE42021_TCONV_PLN_VS_TREG_PRECURSORS_THYMUS_UP	65	-0.429295	-1.72534	0
620	GOBP_MUSCLE_CONTRACTION	89	-0.398404	-1.72556	0
621	HOELZEL_NF1_TARGETS_UP	44	-0.42205	-1.72635	0
622	GSE3982_MEMORY_CD4_TCELL_VS_TH2_UP	52	-0.438471	-1.72648	0
623	GSE34006_A2AR_KO_VS_A2AR_AGONIST_TREATED_TREG_UP	70	-0.409198	-1.7267	0
624	GSE17974_CTRL_VS_ACT_IL4_AND_ANTI_IL12_12H_CD4_TCELL_UP	47	-0.444252	-1.72671	0
625	GOBP_REGULATION_OF_HEART_RATE	22	-0.530291	-1.72706	0
626	SEKI_INFLAMMATORY_RESPONSE_LPS_UP	18	-0.544206	-1.72842	0
627	CREIGHTON_ENDOCRINE_THERAPY_RESISTANCE_5	140	-0.352789	-1.72859	0
628	KEGG_CALCIUM_SIGNALING_PATHWAY	38	-0.458844	-1.72934	0
629	GSE360_HIGH_DOSE_B_MALAYI_VS_M_TUBERCULOSIS_DC_DN	49	-0.4177	-1.72954	0
630	WP_EGFR_TYROSINE_KINASE_INHIBITOR_RESISTANCE	30	-0.483777	-1.72964	0
631	SWEET_LUNG_CANCER_KRAS_UP	140	-0.354171	-1.72991	0
632	REACTOME_INNATE_IMMUNE_SYSTEM	241	-0.336703	-1.73	0
633	GOBP_NEGATIVE_REGULATION_OF_CELL_ADHESION	95	-0.382118	-1.73064	0
634	TSAI_RESPONSE_TO_IONIZING_RADIATION	45	-0.452705	-1.7311	0
635	GSE24634_TEFF_VS_TCONV_DAY7_IN_CULTURE_DN	63	-0.438383	-1.73138	0
636	WP_PI3KAKT_SIGNALING_PATHWAY	92	-0.406812	-1.7318	0
637	GSE9960_GRAM_NEG_VS_GRAM_POS_SEPSIS_PBMC_UP	51	-0.423334	-1.73234	0
638	HP_CARDIOMEGALY	35	-0.472963	-1.73236	0
639	MIR32_5P	125	-0.360785	-1.73241	0
640	GOBP_UROGENITAL_SYSTEM_DEVELOPMENT	92	-0.373742	-1.73296	0
641	GSE21033_CTRL_VS_POLYIC_STIM_DC_1H_DN	46	-0.464123	-1.73345	0
642	GOMF_ENZYME_INHIBITOR_ACTIVITY	80	-0.388825	-1.73463	0
643	MIR642A_3P_MIR642B_3P	38	-0.478811	-1.73505	0
644	GOCC_LAMELLIPODIUM	69	-0.396749	-1.73521	0
645	DITTMER_PTHLH_TARGETS_DN	22	-0.5663	-1.73527	0
646	GSE9650_NAIVE_VS_EXHAUSTED_CD8_TCELL_DN	56	-0.434645	-1.73533	0
647	GOBP_LENS_DEVELOPMENT_IN_CAMERA_TYPE_EYE	20	-0.508859	-1.73585	0
648	GSE14415_INDUCED_VS_NATURAL_TREG_UP	41	-0.458466	-1.73626	0
649	HP_PAPULE	21	-0.573617	-1.73627	0
650	MIR25_3P	107	-0.357209	-1.73643	0
651	HP_ABNORMAL_AORTIC_VALVE_MORPHOLOGY	44	-0.43067	-1.73687	0
652	GOBP_INTRACELLULAR_RECEPTOR_SIGNALING_PATHWAY	84	-0.380034	-1.73715	0
653	TRAYNOR_RETT_SYNDROM_UP	15	-0.566975	-1.73751	0
654	ANDERSEN_CHOLANGIOCARCINOMA_CLASS1	16	-0.585627	-1.73795	0
655	GOBP_EPITHELIAL_CELL_DIFFERENTIATION	158	-0.3487	-1.73821	0
656	GSE2706_R848_VS_R848_AND_LPS_2H_STIM_DC_DN	57	-0.455514	-1.73834	0
657	GSE17721_LPS_VS_PAM3CSK4_2H_BMDC_UP	49	-0.426279	-1.73841	0
658	PRC2_EZH2_UP.V1_UP	50	-0.419992	-1.73943	0
659	REACTOME_ECM_PROTEOGLYCANS	29	-0.504565	-1.73949	0
660	GOBP_RESPONSE_TO_KETONE	51	-0.429857	-1.73954	0
661	GOBP_MEMORY	23	-0.529716	-1.73959	0
662	HP_ABNORMAL_PLEURA_MORPHOLOGY	18	-0.549792	-1.73963	0
663	KEGG_APOPTOSIS	27	-0.518979	-1.7398	0
664	MEISSNER_BRAIN_HCP_WITH_H3K4ME3_AND_H3K27ME3	296	-0.320852	-1.74105	0
665	GSE16266_CTRL_VS_LPS_STIM_MEF_UP	65	-0.419654	-1.74125	0
666	SENESE_HDAC3_TARGETS_DN	161	-0.353454	-1.74147	0
667	GSE45365_WT_VS_IFNAR_KO_CD8A_DC_DN	61	-0.421925	-1.7421	0
668	GOBP_MYELOID_CELL_HOMEOSTASIS	44	-0.416061	-1.74231	0
669	GSE9006_TYPE_1_VS_TYPE_2_DIABETES_PBMC_AT_DX_DN	57	-0.445094	-1.74278	0
670	RB_DN.V1_DN	38	-0.456893	-1.74289	0
671	GSE8921_3H_VS_24H_TLR1_2_STIM_MONOCYTE_DN	57	-0.427434	-1.74351	0
672	NAKAYA_MONOCYTE_FLUMIST_AGE_18_50YO_7DY_DN	73	-0.3956	-1.74361	0
673	OSF2_Q6	67	-0.414757	-1.74431	0
674	GSE21360_TERTIARY_VS_QUATERNARY_MEMORY_CD8_TCELL_UP	47	-0.425558	-1.74479	0
675	GSE23505_IL6_IL1_IL23_VS_IL6_IL1_TGFB_TREATED_CD4_TCELL_UP	62	-0.41872	-1.74504	0
676	GSE6259_DEC205_POS_DC_VS_BCELL_DN	60	-0.419772	-1.74552	0
677	WP_IL18_SIGNALING_PATHWAY	77	-0.408261	-1.74561	0
678	GOBP_REGULATION_OF_BIOLOGICAL_PROCESS_INVOLVED_IN_SYMBIOTIC_INTERACTION	45	-0.460355	-1.74574	0
679	GOBP_POSITIVE_REGULATION_OF_CYTOKINE_PRODUCTION	111	-0.386194	-1.74574	0
680	IRF_Q6	61	-0.408118	-1.7459	0
681	MIR1468_3P	155	-0.349431	-1.74596	0
682	LAKE_ADULT_KIDNEY_C10_THIN_ASCENDING_LIMB	132	-0.364181	-1.74647	0
683	GSE17721_PAM3CSK4_VS_CPG_4H_BMDC_DN	56	-0.416477	-1.7468	0
684	GOBP_REGULATION_OF_ACTIN_FILAMENT_BASED_PROCESS	119	-0.394271	-1.7471	0
685	GOBP_REGULATION_OF_IMMUNE_SYSTEM_PROCESS	348	-0.328101	-1.74717	0
686	GOMF_PEPTIDASE_ACTIVITY	112	-0.367835	-1.74741	0
687	GOBP_PROTEIN_MATURATION	75	-0.395033	-1.74765	0
688	CUI_DEVELOPING_HEART_C5_VALVAR_CELL	84	-0.395981	-1.74801	0
689	MSX1_01	57	-0.421067	-1.7486	0
690	GSE3982_DC_VS_EFF_MEMORY_CD4_TCELL_UP	63	-0.406726	-1.74877	0
691	GOBP_REGULATION_OF_ANATOMICAL_STRUCTURE_MORPHOGENESIS	266	-0.332265	-1.74886	0
692	GSE21670_STAT3_KO_VS_WT_CD4_TCELL_IL6_TREATED_DN	41	-0.476829	-1.74931	0
693	GSE20727_ROS_INH_VS_ROS_INH_AND_DNFB_ALLERGEN_TREATED_DC_UP	67	-0.409826	-1.74935	0
694	BOSCO_INTERFERON_INDUCED_ANTIVIRAL_MODULE	23	-0.498165	-1.74935	0
695	NAKAMURA_TUMOR_ZONE_PERIPHERAL_VS_CENTRAL_DN	189	-0.353655	-1.74935	0
696	TRAVAGLINI_LUNG_BASOPHIL_MAST_2_CELL	154	-0.353368	-1.74967	0
697	GOBP_TUMOR_NECROSIS_FACTOR_SUPERFAMILY_CYTOKINE_PRODUCTION	47	-0.450972	-1.75029	0
698	GSE1460_INTRATHYMIC_T_PROGENITOR_VS_DP_THYMOCYTE_DN	51	-0.437879	-1.75053	0
699	GSE40274_HELIOS_VS_FOXP3_AND_HELIOS_TRANSDUCED_ACTIVATED_CD4_TCELL_UP	49	-0.43858	-1.75055	0
700	HP_NEOPLASM_OF_THE_SKIN	51	-0.431024	-1.75221	0
701	HP_ABNORMAL_INFLAMMATORY_RESPONSE	224	-0.34451	-1.75229	0
702	GOBP_REGULATION_OF_RESPONSE_TO_STRESS	365	-0.33578	-1.75278	0
703	GSE2706_2H_VS_8H_R848_STIM_DC_UP	59	-0.417189	-1.75355	0
704	HP_LIPODYSTROPHY	28	-0.521593	-1.75361	0
705	GOBP_POSITIVE_REGULATION_OF_RECEPTOR_MEDIATED_ENDOCYTOSIS	15	-0.591213	-1.75371	0
706	MIR4679	43	-0.485937	-1.75374	0
707	GSE11057_NAIVE_CD4_VS_PBMC_CD4_TCELL_DN	59	-0.412203	-1.75385	0
708	GSE22033_UNTREATED_VS_ROSIGLITAZONE_TREATED_MEF_DN	62	-0.403367	-1.75408	0
709	GSE2706_UNSTIM_VS_2H_LPS_AND_R848_DC_DN	47	-0.435238	-1.75414	0
710	GOBP_REGULATION_OF_INTRACELLULAR_SIGNAL_TRANSDUCTION	491	-0.319135	-1.75443	0
711	GOBP_NEGATIVE_REGULATION_OF_DEVELOPMENTAL_PROCESS	229	-0.344494	-1.75471	0
712	GOBP_POSITIVE_REGULATION_OF_COLD_INDUCED_THERMOGENESIS	26	-0.50991	-1.75518	0
713	GSE22886_NAIVE_TCELL_VS_NEUTROPHIL_DN	46	-0.444582	-1.75546	0
714	GOBP_NEGATIVE_REGULATION_OF_HYDROLASE_ACTIVITY	99	-0.375733	-1.7556	0
715	GSE19198_1H_VS_6H_IL21_TREATED_TCELL_DN	60	-0.422707	-1.75583	0
716	GOBP_NEGATIVE_REGULATION_OF_CATALYTIC_ACTIVITY	191	-0.342626	-1.75588	0
717	GOBP_POSITIVE_REGULATION_OF_MAPK_CASCADE	128	-0.37348	-1.75596	0
718	GOBP_POSITIVE_REGULATION_OF_AUTOPHAGY	40	-0.435856	-1.75631	0
719	HP_HERNIA	128	-0.359114	-1.75644	0
720	GOBP_REGULATION_OF_IMMUNE_EFFECTOR_PROCESS	93	-0.394678	-1.75721	0
721	GOBP_AUTOPHAGOSOME_ORGANIZATION	36	-0.443285	-1.7574	0
722	AIZARANI_LIVER_C9_LSECS_1	97	-0.384909	-1.75744	0
723	GOBP_POSITIVE_REGULATION_OF_PEPTIDE_SECRETION	29	-0.487055	-1.75756	0
724	ZHOU_INFLAMMATORY_RESPONSE_FIMA_UP	134	-0.36041	-1.75761	0
725	GOBP_ACTIN_FILAMENT_ORGANIZATION	132	-0.367804	-1.75833	0
726	GSE16450_CTRL_VS_IFNA_6H_STIM_MATURE_NEURON_CELL_LINE_UP	43	-0.476191	-1.75887	0
727	GSE32986_CURDLAN_LOWDOSE_VS_CURDLAN_HIGHDOSE_STIM_DC_DN	60	-0.399222	-1.75901	0
728	HP_ABNORMAL_CORNEAL_EPITHELIUM_MORPHOLOGY	30	-0.483184	-1.75904	0
729	GOBP_ACTOMYOSIN_STRUCTURE_ORGANIZATION	58	-0.436523	-1.75932	0
730	GSE42021_TREG_PLN_VS_CD24INT_TREG_THYMUS_UP	66	-0.433445	-1.75957	0
731	BROCKE_APOPTOSIS_REVERSED_BY_IL6	59	-0.410446	-1.75982	0
732	HP_CONTRACTURES_OF_THE_JOINTS_OF_THE_UPPER_LIMBS	80	-0.409165	-1.76068	0
733	HP_ABNORMAL_AORTIC_MORPHOLOGY	87	-0.401427	-1.7615	0
734	DESCARTES_FETAL_EYE_SKELETAL_MUSCLE_CELLS	31	-0.491288	-1.76157	0
735	MARTINEZ_RESPONSE_TO_TRABECTEDIN_UP	21	-0.572586	-1.76178	0
736	GSE44649_WT_VS_MIR155_KO_ACTIVATED_CD8_TCELL_UP	60	-0.417835	-1.76187	0
737	WIELAND_UP_BY_HBV_INFECTION	32	-0.490934	-1.76236	0
738	GOBP_TEMPERATURE_HOMEOSTASIS	42	-0.479819	-1.76264	0
739	GSE2405_0H_VS_24H_A_PHAGOCYTOPHILUM_STIM_NEUTROPHIL_DN	61	-0.431395	-1.76274	0
740	HP_SKIN_ULCER	29	-0.496297	-1.76288	0
741	HALLMARK_ALLOGRAFT_REJECTION	51	-0.430563	-1.76311	0
742	GOBP_REGULATION_OF_TOLL_LIKE_RECEPTOR_SIGNALING_PATHWAY	21	-0.515246	-1.76318	0
743	GOBP_REGULATION_OF_RHO_PROTEIN_SIGNAL_TRANSDUCTION	24	-0.554415	-1.76335	0
744	RUTELLA_RESPONSE_TO_CSF2RB_AND_IL4_UP	103	-0.372654	-1.76372	0
745	GOBP_EPIDERMAL_CELL_DIFFERENTIATION	46	-0.458079	-1.76372	0
746	REACTOME_SIGNALING_BY_INTERLEUKINS	113	-0.374304	-1.76414	0
747	HP_CUTIS_MARMORATA	22	-0.543792	-1.76419	0
748	GOBP_REGULATION_OF_INFLAMMATORY_RESPONSE	95	-0.385559	-1.76424	0
749	GOBP_INTERLEUKIN_6_PRODUCTION	40	-0.466539	-1.76512	0
750	GOBP_NEGATIVE_REGULATION_OF_EPITHELIAL_CELL_PROLIFERATION	33	-0.512295	-1.76531	0
751	HP_ECTOPIA_LENTIS	15	-0.615254	-1.7658	0
752	VERHAAK_AML_WITH_NPM1_MUTATED_DN	73	-0.411321	-1.76598	0
753	GOLDRATH_ANTIGEN_RESPONSE	128	-0.366173	-1.76629	0
754	JAEGER_METASTASIS_DN	54	-0.427557	-1.76647	0
755	WP_INTEGRINMEDIATED_CELL_ADHESION	37	-0.453991	-1.7666	0
756	GOBP_NEGATIVE_REGULATION_OF_INTRINSIC_APOPTOTIC_SIGNALING_PATHWAY	31	-0.505449	-1.76677	0
757	GSE29618_BCELL_VS_PDC_DN	63	-0.425844	-1.767	0
758	GOBP_NEGATIVE_REGULATION_OF_HEMOPOIESIS	37	-0.462452	-1.76739	0
759	GOMF_GLYCOSAMINOGLYCAN_BINDING	62	-0.430861	-1.76775	0
760	HOSHIDA_LIVER_CANCER_LATE_RECURRENCE_UP	18	-0.581463	-1.76777	0
761	GSE11864_CSF1_PAM3CYS_VS_CSF1_IFNG_PAM3CYS_IN_MAC_DN	58	-0.41778	-1.76803	0
762	GOBP_POSITIVE_REGULATION_OF_DNA_BINDING_TRANSCRIPTION_FACTOR_ACTIVITY	73	-0.409896	-1.76872	0
763	GSE15735_CTRL_VS_HDAC_INHIBITOR_TREATED_CD4_TCELL_2H_UP	46	-0.425824	-1.76876	0
764	MORF_CASP10	19	-0.566259	-1.76911	0
765	HP_ABNORMAL_NEPHRON_MORPHOLOGY	43	-0.436188	-1.7696	0
766	GOBP_NEGATIVE_REGULATION_OF_MYELOID_CELL_DIFFERENTIATION	25	-0.498512	-1.76982	0
767	KEGG_DILATED_CARDIOMYOPATHY	23	-0.540555	-1.77012	0
768	MODULE_436	27	-0.497749	-1.77036	0
769	GSE22886_DAY1_VS_DAY7_MONOCYTE_IN_CULTURE_UP	58	-0.453565	-1.7705	0
770	FAN_OVARY_CL4_T_LYMPHOCYTE_NK_CELL_1	70	-0.418953	-1.77078	0
771	HP_TALIPES_EQUINOVARUS	81	-0.406592	-1.77164	0
772	GOBP_STRIATED_MUSCLE_CELL_DEVELOPMENT	33	-0.517864	-1.77191	0
773	GOBP_POSITIVE_REGULATION_OF_BLOOD_VESSEL_ENDOTHELIAL_CELL_MIGRATION	19	-0.588569	-1.7722	0
774	HP_CORONARY_ARTERY_ATHEROSCLEROSIS	15	-0.601411	-1.77227	0
775	GOBP_APOPTOTIC_SIGNALING_PATHWAY	164	-0.374774	-1.77247	0
776	GSE13485_DAY1_VS_DAY3_YF17D_VACCINE_PBMC_DN	53	-0.410467	-1.77268	0
777	GSE37301_MULTIPOTENT_PROGENITOR_VS_GRAN_MONO_PROGENITOR_DN	62	-0.437289	-1.7728	0
778	GAUSSMANN_MLL_AF4_FUSION_TARGETS_E_UP	29	-0.518683	-1.77339	0
779	CSR_LATE_UP.V1_UP	64	-0.422626	-1.77423	0
780	GOBP_TRANSMEMBRANE_RECEPTOR_PROTEIN_TYROSINE_KINASE_SIGNALING_PATHWAY	187	-0.357891	-1.77442	0
781	GSE17721_PAM3CSK4_VS_GADIQUIMOD_12H_BMDC_DN	74	-0.416559	-1.77443	0
782	GOBP_POSITIVE_REGULATION_OF_INFLAMMATORY_RESPONSE	48	-0.44376	-1.77463	0
783	GSE26030_TH1_VS_TH17_DAY15_POST_POLARIZATION_DN	59	-0.459979	-1.77501	0
784	GSE17721_LPS_VS_CPG_16H_BMDC_UP	44	-0.419475	-1.77507	0
785	GSE5463_CTRL_VS_DEXAMETHASONE_TREATED_THYMOCYTE_DN	53	-0.45091	-1.77549	0
786	GSE14415_NATURAL_TREG_VS_TCONV_UP	48	-0.420917	-1.77563	0
787	GOCC_AZUROPHIL_GRANULE_LUMEN	22	-0.523757	-1.77591	0
788	GOBP_CELL_ACTIVATION	356	-0.338048	-1.77616	0
789	GOBP_MYOFIBRIL_ASSEMBLY	22	-0.516229	-1.77642	0
790	GSE17721_CTRL_VS_POLYIC_4H_BMDC_DN	61	-0.432708	-1.77643	0
791	GSE34156_TLR1_TLR2_LIGAND_VS_NOD2_AND_TLR1_TLR2_LIGAND_24H_TREATED_MONOCYTE_UP	61	-0.396998	-1.77645	0
792	GSE11057_NAIVE_VS_MEMORY_CD4_TCELL_DN	77	-0.417067	-1.77646	0
793	GOBP_INTRINSIC_APOPTOTIC_SIGNALING_PATHWAY	83	-0.400296	-1.77734	0
794	GOMF_ACTIN_BINDING	134	-0.357169	-1.77735	0
795	GOBP_EXTRACELLULAR_MATRIX_ASSEMBLY	21	-0.567193	-1.778	0
796	GSE39820_CTRL_VS_IL1B_IL6_IL23A_CD4_TCELL_DN	64	-0.42608	-1.7784	0
797	GSE34205_HEALTHY_VS_FLU_INF_INFANT_PBMC_DN	60	-0.419664	-1.77859	0
798	GSE360_DC_VS_MAC_M_TUBERCULOSIS_UP	52	-0.426039	-1.77906	0
799	GSE17974_CTRL_VS_ACT_IL4_AND_ANTI_IL12_24H_CD4_TCELL_UP	53	-0.430646	-1.77911	0
800	GOBP_POSITIVE_REGULATION_OF_CELL_JUNCTION_ASSEMBLY	40	-0.48166	-1.77928	0
801	KRAS.300_UP.V1_DN	28	-0.44793	-1.7794	0
802	HAY_BONE_MARROW_NEUTROPHIL	130	-0.367709	-1.77969	0
803	THAKAR_PBMC_INACTIVATED_INFLUENZA_AGE_21_30YO_NONRESPONDER_7DY_DN	23	-0.522282	-1.78005	0
804	HP_ABNORMALITY_OF_DENTAL_STRUCTURE	79	-0.40233	-1.78021	0
805	GOBP_CELL_CELL_ADHESION	265	-0.338017	-1.78022	0
806	GTGCAAT_MIR25_MIR32_MIR92_MIR363_MIR367	83	-0.388286	-1.78061	0
807	GOBP_POSITIVE_REGULATION_OF_CELL_SUBSTRATE_ADHESION	40	-0.468362	-1.78101	0
808	GOBP_POSITIVE_REGULATION_OF_PROTEIN_MODIFICATION_PROCESS	253	-0.341914	-1.78103	0
809	GOCC_PIGMENT_GRANULE	33	-0.483971	-1.78116	0
810	GSE5589_IL6_KO_VS_IL10_KO_LPS_AND_IL10_STIM_MACROPHAGE_45MIN_UP	54	-0.450369	-1.78143	0
811	KAECH_NAIVE_VS_DAY8_EFF_CD8_TCELL_DN	70	-0.415664	-1.78212	0
812	AMIT_EGF_RESPONSE_120_MCF10A	16	-0.572379	-1.78264	0
813	GSE17721_LPS_VS_CPG_2H_BMDC_UP	62	-0.436448	-1.7841	0
814	REACTOME_FORMATION_OF_THE_CORNIFIED_ENVELOPE	15	-0.637299	-1.78412	0
815	QI_PLASMACYTOMA_UP	64	-0.448796	-1.78423	0
816	GSE7460_TCONV_VS_TREG_THYMUS_DN	60	-0.409089	-1.78453	0
817	GSE14000_UNSTIM_VS_4H_LPS_DC_DN	60	-0.427365	-1.78488	0
818	GSE21380_TFH_VS_GERMINAL_CENTER_TFH_CD4_TCELL_UP	58	-0.419912	-1.78503	0
819	HP_ABNORMAL_EYELASH_MORPHOLOGY	56	-0.445337	-1.78526	0
820	REACTOME_GPCR_LIGAND_BINDING	54	-0.449064	-1.78534	0
821	GSE45365_CD8A_DC_VS_CD11B_DC_UP	54	-0.417595	-1.78615	0
822	AMIT_EGF_RESPONSE_240_HELA	25	-0.562126	-1.78642	0
823	GSE17974_IL4_AND_ANTI_IL12_VS_UNTREATED_1H_ACT_CD4_TCELL_DN	45	-0.449699	-1.78654	0
824	GSE32164_RESTING_DIFFERENTIATED_VS_ALTERNATIVELY_ACT_M2_MACROPHAGE_DN	55	-0.425438	-1.78681	0
825	MANNE_COVID19_COMBINED_COHORT_VS_HEALTHY_DONOR_PLATELETS_DN	49	-0.453501	-1.787	0
826	STTTCRNTTT_IRF_Q6	56	-0.438924	-1.78702	0
827	GSE4590_PRE_BCELL_VS_LARGE_PRE_BCELL_UP	47	-0.461491	-1.78709	0
828	GOBP_POSITIVE_REGULATION_OF_I_KAPPAB_KINASE_NF_KAPPAB_SIGNALING	61	-0.461759	-1.78762	0
829	GSE17721_12H_VS_24H_CPG_BMDC_UP	54	-0.435149	-1.78788	0
830	GSE35825_UNTREATED_VS_IFNG_STIM_MACROPHAGE_UP	56	-0.45696	-1.78788	0
831	HOWARD_NEUTROPHIL_INACT_MONOV_INFLUENZA_A_INDONESIA_05_2005_H5N1_AGE_18_49YO_3DY_UP	36	-0.498171	-1.78796	0
832	GSE14769_UNSTIM_VS_80MIN_LPS_BMDM_DN	63	-0.444785	-1.78931	0
833	HP_ABNORMALITY_OF_UPPER_LIMB_JOINT	130	-0.362259	-1.7898	0
834	GSE9946_MATURE_STIMULATORY_VS_PROSTAGLANDINE2_TREATED_MATURE_DC_UP	31	-0.479478	-1.79025	0
835	GSE41867_NAIVE_VS_DAY6_LCMV_EFFECTOR_CD8_TCELL_UP	47	-0.434413	-1.79025	0
836	MIR197_3P	17	-0.607382	-1.7903	0
837	ZHU_CMV_ALL_UP	36	-0.477094	-1.79043	0
838	GSE37533_UNTREATED_VS_PIOGLIZATONE_TREATED_CD4_TCELL_PPARG1_AND_FOXP3_TRASDUCED_UP	64	-0.423485	-1.79101	0
839	GOBP_PROGRAMMED_NECROTIC_CELL_DEATH	21	-0.553361	-1.79177	0
840	RODRIGUES_NTN1_TARGETS_DN	50	-0.444185	-1.79206	0
841	GOCC_GOLGI_APPARATUS	410	-0.322506	-1.79215	0
842	GSE24142_DN2_VS_DN3_THYMOCYTE_UP	69	-0.407301	-1.79269	0
843	GSE19888_ADENOSINE_A3R_INH_VS_ACT_WITH_INHIBITOR_PRETREATMENT_IN_MAST_CELL_UP	49	-0.442902	-1.79301	0
844	GSE14769_UNSTIM_VS_60MIN_LPS_BMDM_DN	64	-0.407242	-1.79309	0
845	GOCC_GOLGI_APPARATUS_SUBCOMPARTMENT	246	-0.335752	-1.79316	0
846	RUBENSTEIN_SKELETAL_MUSCLE_SMOOTH_MUSCLE_CELLS	153	-0.375733	-1.79337	0
847	YAO_TEMPORAL_RESPONSE_TO_PROGESTERONE_CLUSTER_6	25	-0.549562	-1.79387	0
848	GOBP_NEGATIVE_REGULATION_OF_SIGNALING	385	-0.339111	-1.79422	0
849	MODULE_119	39	-0.461887	-1.79423	0
850	GSE25123_IL4_VS_IL4_AND_ROSIGLITAZONE_STIM_PPARG_KO_MACROPHAGE_DAY10_DN	56	-0.420539	-1.79448	0
851	GSE10325_MYELOID_VS_LUPUS_MYELOID_DN	64	-0.42694	-1.79485	0
852	HOEBEKE_LYMPHOID_STEM_CELL_DN	33	-0.487998	-1.7949	0
853	GSE2770_TGFB_AND_IL4_VS_IL4_TREATED_ACT_CD4_TCELL_48H_UP	61	-0.421501	-1.79541	0
854	GSE21380_NON_TFH_VS_TFH_CD4_TCELL_DN	60	-0.442951	-1.79559	0
855	GSE8384_CTRL_VS_B_ABORTUS_4H_MAC_CELL_LINE_DN	67	-0.399821	-1.79608	0
856	GSE17721_CTRL_VS_GARDIQUIMOD_12H_BMDC_DN	65	-0.425654	-1.79611	0
857	GSE40274_FOXP3_VS_FOXP3_AND_LEF1_TRANSDUCED_ACTIVATED_CD4_TCELL_UP	58	-0.430793	-1.79644	0
858	FAN_EMBRYONIC_CTX_BRAIN_EFFECTOR_T_CELL	29	-0.513753	-1.79705	0
859	NAKAYAMA_SOFT_TISSUE_TUMORS_PCA2_UP	35	-0.481873	-1.79706	0
860	GOCC_ACTIN_FILAMENT_BUNDLE	29	-0.514134	-1.7976	0
861	GSE32164_RESTING_DIFFERENTIATED_VS_CMYC_INHIBITED_MACROPHAGE_DN	62	-0.428634	-1.79767	0
862	HP_INGUINAL_HERNIA	71	-0.42702	-1.79857	0
863	JINESH_BLEBBISHIELD_TRANSFORMED_STEM_CELL_SPHERES_UP	62	-0.458846	-1.79866	0
864	GOBP_REGULATION_OF_PROTEIN_LOCALIZATION_TO_CELL_PERIPHERY	44	-0.471055	-1.7992	0
865	DESCARTES_FETAL_CEREBRUM_MICROGLIA	78	-0.412672	-1.79955	0
866	REACTOME_COLLAGEN_CHAIN_TRIMERIZATION	19	-0.590561	-1.79971	0
867	GSE36527_CD69_NEG_VS_POS_TREG_CD62L_LOS_KLRG1_NEG_UP	69	-0.404838	-1.80001	0
868	GSE40274_SATB1_VS_FOXP3_AND_SATB1_TRANSDUCED_ACTIVATED_CD4_TCELL_DN	36	-0.482049	-1.80011	0
869	DOUGLAS_BMI1_TARGETS_DN	109	-0.386598	-1.80061	0
870	MODULE_241	24	-0.534441	-1.80109	0
871	GSE22611_UNSTIM_VS_6H_MDP_STIM_MUTANT_NOD2_TRANSDUCED_HEK293T_CELL_UP	54	-0.451941	-1.8011	0
872	GOBP_POSITIVE_REGULATION_OF_HEMOPOIESIS	41	-0.472596	-1.8011	0
873	GOBP_REGULATION_OF_RAS_PROTEIN_SIGNAL_TRANSDUCTION	60	-0.446415	-1.80127	0
874	GOBP_TAXIS	153	-0.360043	-1.80148	0
875	GOBP_REGULATION_OF_EXTRINSIC_APOPTOTIC_SIGNALING_PATHWAY	49	-0.443167	-1.80149	0
876	MARKEY_RB1_ACUTE_LOF_DN	69	-0.433079	-1.80183	0
877	GSE29618_BCELL_VS_MONOCYTE_DAY7_FLU_VACCINE_DN	63	-0.415405	-1.8029	0
878	CHIARADONNA_NEOPLASTIC_TRANSFORMATION_KRAS_CDC25_DN	17	-0.617516	-1.80308	0
879	AMIT_EGF_RESPONSE_480_MCF10A	16	-0.581729	-1.80344	0
880	BROWNE_HCMV_INFECTION_8HR_DN	18	-0.612351	-1.80346	0
881	GSE32986_CURDLAN_HIGHDOSE_VS_GMCSF_AND_CURDLAN_HIGHDOSE_STIM_DC_DN	56	-0.441254	-1.80354	0
882	HP_LIMB_JOINT_CONTRACTURE	94	-0.404256	-1.80379	0
883	GOBP_MUSCLE_ORGAN_DEVELOPMENT	76	-0.404173	-1.80431	0
884	RUTELLA_RESPONSE_TO_CSF2RB_AND_IL4_DN	100	-0.408413	-1.8044	0
885	GOBP_LOCOMOTION	463	-0.325663	-1.80441	0
886	ZHONG_SECRETOME_OF_LUNG_CANCER_AND_MACROPHAGE	28	-0.501405	-1.80454	0
887	COREBINDINGFACTOR_Q6	70	-0.395306	-1.80563	0
888	GSE27670_CTRL_VS_LMP1_TRANSDUCED_GC_BCELL_DN	51	-0.456782	-1.80573	0
889	GOBP_POSITIVE_REGULATION_OF_SECRETION	61	-0.425268	-1.80634	0
890	MIR4326	18	-0.597813	-1.80665	0
891	GOBP_NEGATIVE_REGULATION_OF_HORMONE_SECRETION	18	-0.594161	-1.80671	0
892	BURTON_ADIPOGENESIS_7	28	-0.524249	-1.80676	0
893	BACH1_01	90	-0.394109	-1.80682	0
894	GSE27786_CD8_TCELL_VS_ERYTHROBLAST_DN	39	-0.45783	-1.80742	0
895	EPPERT_HSC_R	34	-0.496927	-1.80747	0
896	HP_LIMITATION_OF_JOINT_MOBILITY	94	-0.394869	-1.80747	0
897	HP_ABNORMALITY_OF_BLOOD_AND_BLOOD_FORMING_TISSUES	318	-0.342127	-1.80803	0
898	GOBP_MYELOID_CELL_DIFFERENTIATION	101	-0.415919	-1.80815	0
899	MODULE_322	16	-0.567173	-1.80854	0
900	DAZARD_RESPONSE_TO_UV_NHEK_UP	56	-0.425811	-1.81006	0
901	MODULE_289	16	-0.607963	-1.81011	0
902	GSE11864_CSF1_IFNG_VS_CSF1_IFNG_PAM3CYS_IN_MAC_DN	41	-0.46998	-1.81099	0
903	ZHONG_RESPONSE_TO_AZACITIDINE_AND_TSA_UP	51	-0.451799	-1.81105	0
904	DESCARTES_MAIN_FETAL_TROPHOBLAST_GIANT_CELLS	33	-0.487915	-1.81154	0
905	GSE29618_MONOCYTE_VS_MDC_UP	53	-0.427736	-1.8116	0
906	GSE21360_TERTIARY_VS_QUATERNARY_MEMORY_CD8_TCELL_DN	58	-0.417737	-1.81168	0
907	GSE21546_ELK1_KO_VS_SAP1A_KO_AND_ELK1_KO_DP_THYMOCYTES_UP	55	-0.45374	-1.81225	0
908	GOCC_SUPRAMOLECULAR_POLYMER	228	-0.362371	-1.81266	0
909	GSE28408_LY6G_POS_VS_NEG_DC_UP	53	-0.450509	-1.81301	0
910	GOBP_POSITIVE_REGULATION_OF_PROTEIN_KINASE_B_SIGNALING	35	-0.492516	-1.81346	0
911	GOMF_MODIFIED_AMINO_ACID_BINDING	28	-0.52551	-1.8135	0
912	GOBP_EXTRINSIC_APOPTOTIC_SIGNALING_PATHWAY_VIA_DEATH_DOMAIN_RECEPTORS	23	-0.539979	-1.81358	0
913	GOBP_REGULATION_OF_ACTIN_FILAMENT_ORGANIZATION	86	-0.413905	-1.81421	0
914	BILD_SRC_ONCOGENIC_SIGNATURE	17	-0.581103	-1.81426	0
915	MODULE_85	15	-0.614293	-1.81459	0
916	GOBP_RESPONSE_TO_TUMOR_NECROSIS_FACTOR	84	-0.417009	-1.81478	0
917	QUEREC_PBMC_YF_17D_VACCINE_AGE_18_45YO_7DY_UP	21	-0.578947	-1.81489	0
918	GSE22886_NAIVE_BCELL_VS_NEUTROPHIL_DN	60	-0.424859	-1.81501	0
919	GOBP_REGULATION_OF_PHOSPHORUS_METABOLIC_PROCESS	395	-0.336397	-1.81517	0
920	GSE34156_TLR1_TLR2_LIGAND_VS_NOD2_AND_TLR1_TLR2_LIGAND_6H_TREATED_MONOCYTE_UP	45	-0.446554	-1.81531	0
921	GSE17721_CTRL_VS_LPS_1H_BMDC_DN	51	-0.450718	-1.81538	0
922	GOBP_POSITIVE_REGULATION_OF_RESPONSE_TO_WOUNDING	24	-0.518518	-1.81573	0
923	GSE33424_CD161_INT_VS_NEG_CD8_TCELL_UP	68	-0.429421	-1.81676	0
924	GSE41176_WT_VS_TAK1_KO_ANTI_IGM_STIM_BCELL_24H_UP	75	-0.417192	-1.81679	0
925	YAGI_AML_FAB_MARKERS	60	-0.432026	-1.81692	0
926	DESCARTES_FETAL_PANCREAS_MESOTHELIAL_CELLS	15	-0.611924	-1.81716	0
927	HP_THIN_SKIN	25	-0.58259	-1.81722	0
928	GSE7568_CTRL_VS_24H_TGFB_TREATED_MACROPHAGES_WITH_IL4_AND_DEXAMETHASONE_UP	53	-0.443274	-1.81728	0
929	GSE40274_CTRL_VS_FOXP3_TRANSDUCED_ACTIVATED_CD4_TCELL_DN	51	-0.450465	-1.81742	0
930	GOBP_POSITIVE_REGULATION_OF_IMMUNE_SYSTEM_PROCESS	217	-0.361167	-1.8175	0
931	GSE26030_UNSTIM_VS_RESTIM_TH1_DAY5_POST_POLARIZATION_DN	54	-0.456562	-1.81833	0
932	LEE_EARLY_T_LYMPHOCYTE_DN	21	-0.557713	-1.81891	0
933	HOSHIDA_LIVER_CANCER_SURVIVAL_UP	20	-0.561571	-1.81923	0
934	RICKMAN_TUMOR_DIFFERENTIATED_WELL_VS_MODERATELY_DN	23	-0.533068	-1.81929	0
935	WP_ASSOCIATION_BETWEEN_PHYSICOCHEMICAL_FEATURES_AND_TOXICITY_ASSOCIATED_PATHWAYS	20	-0.53552	-1.82014	0
936	GSE21360_NAIVE_VS_SECONDARY_MEMORY_CD8_TCELL_UP	69	-0.441346	-1.82044	0
937	GSE14415_INDUCED_TREG_VS_TCONV_DN	49	-0.444037	-1.82074	0
938	GSE7548_NAIVE_VS_DAY7_PCC_IMMUNIZATION_CD4_TCELL_DN	67	-0.447889	-1.8208	0
939	HP_MULTIFACTORIAL_INHERITANCE	21	-0.557805	-1.82095	0
940	GSE6269_FLU_VS_STAPH_AUREUS_INF_PBMC_DN	55	-0.451802	-1.82102	0
941	ICHIBA_GRAFT_VERSUS_HOST_DISEASE_35D_UP	37	-0.486501	-1.82113	0
942	HP_ABNORMALITY_OF_THE_ABDOMINAL_WALL	125	-0.372819	-1.82128	0
943	GOBP_REGULATION_OF_EXTRINSIC_APOPTOTIC_SIGNALING_PATHWAY_VIA_DEATH_DOMAIN_RECEPTORS	17	-0.538705	-1.82241	0
944	GOBP_EXTRACELLULAR_MATRIX_DISASSEMBLY	20	-0.551145	-1.82274	0
945	GSE22140_GERMFREE_VS_SPF_MOUSE_CD4_TCELL_UP	62	-0.42113	-1.8228	0
946	DURANTE_ADULT_OLFACTORY_NEUROEPITHELIUM_CD8_T_CELLS	16	-0.61804	-1.8229	0
947	AKT_UP.V1_DN	53	-0.437437	-1.82308	0
948	GSE21927_SPLEEN_VS_C26GM_TUMOR_MONOCYTE_BALBC_UP	40	-0.472362	-1.82328	0
949	ZWANG_CLASS_3_TRANSIENTLY_INDUCED_BY_EGF	80	-0.431271	-1.82359	0
950	GOBP_CYTOKINE_PRODUCTION	203	-0.36391	-1.82373	0
951	HP_LIPOATROPHY	21	-0.584607	-1.82373	0
952	KEGG_HYPERTROPHIC_CARDIOMYOPATHY_HCM	22	-0.584987	-1.8242	0
953	GOBP_POSITIVE_REGULATION_OF_PATTERN_RECOGNITION_RECEPTOR_SIGNALING_PATHWAY	16	-0.603622	-1.82437	0
954	DACOSTA_UV_RESPONSE_VIA_ERCC3_XPCS_DN	22	-0.578994	-1.82448	0
955	TRAVAGLINI_LUNG_PLATELET_MEGAKARYOCYTE_CELL	155	-0.387341	-1.82456	0
956	HP_ABNORMALITY_OF_HAIR_TEXTURE	34	-0.489738	-1.82486	0
957	HP_AORTIC_REGURGITATION	28	-0.514771	-1.82498	0
958	DAUER_STAT3_TARGETS_UP	22	-0.554657	-1.82532	0
959	REACTOME_HEMOSTASIS	158	-0.365337	-1.82538	0
960	GSE17721_CTRL_VS_LPS_4H_BMDC_DN	50	-0.470298	-1.8257	0
961	HP_ABNORMALITY_OF_HUMORAL_IMMUNITY	67	-0.440031	-1.82619	0
962	SCHERER_PBMC_APSV_WETVAX_AGE_18_40YO_JOINT_TO_VACCINIA_AND_YELLOW_FEVER_UP	17	-0.578251	-1.82706	0
963	GSE30962_PRIMARY_VS_SECONDARY_CHRONIC_LCMV_INF_CD8_TCELL_DN	49	-0.46521	-1.82723	0
964	GOBP_POSITIVE_REGULATION_OF_CELL_GROWTH	41	-0.489958	-1.82746	0
965	GOBP_NEGATIVE_REGULATION_OF_IMMUNE_RESPONSE	43	-0.462759	-1.82748	0
966	GOBP_NEGATIVE_REGULATION_OF_BMP_SIGNALING_PATHWAY	18	-0.615979	-1.82794	0
967	CUI_DEVELOPING_HEART_C8_MACROPHAGE	70	-0.433079	-1.82804	0
968	FEVR_CTNNB1_TARGETS_UP	199	-0.376176	-1.82838	0
969	GOBP_REGULATION_OF_CELL_ADHESION	221	-0.368119	-1.82883	0
970	WP_PRIMARY_FOCAL_SEGMENTAL_GLOMERULOSCLEROSIS_FSGS	32	-0.522221	-1.8289	0
971	GSE360_L_DONOVANI_VS_B_MALAYI_HIGH_DOSE_DC_UP	48	-0.462219	-1.82921	0
972	IL21_UP.V1_UP	38	-0.477195	-1.83025	0
973	GOBP_REGULATION_OF_MUSCLE_CONTRACTION	30	-0.517856	-1.83055	0
974	TAKEDA_TARGETS_OF_NUP98_HOXA9_FUSION_16D_UP	46	-0.460354	-1.83062	0
975	WANG_CLIM2_TARGETS_DN	64	-0.421427	-1.83133	0
976	GSE21063_WT_VS_NFATC1_KO_BCELL_UP	51	-0.458793	-1.83149	0
977	GOBP_PEPTIDYL_TYROSINE_MODIFICATION	98	-0.39783	-1.83156	0
978	HP_ABNORMAL_SYSTEMIC_ARTERIAL_MORPHOLOGY	112	-0.404352	-1.8326	0
979	REACTOME_CELL_CELL_COMMUNICATION	42	-0.465971	-1.83306	0
980	GSE22140_GERMFREE_VS_SPF_ARTHRITIC_MOUSE_CD4_TCELL_DN	60	-0.407331	-1.83346	0
981	GSE22025_UNTREATED_VS_PROGESTERONE_TREATED_CD4_TCELL_UP	54	-0.438896	-1.83485	0
982	GOBP_INOSITOL_LIPID_MEDIATED_SIGNALING	47	-0.470845	-1.83492	0
983	GOBP_REGULATION_OF_PEPTIDYL_TYROSINE_PHOSPHORYLATION	71	-0.42914	-1.83527	0
984	HP_OSTEOPENIA	56	-0.436735	-1.83538	0
985	GSE3982_BASOPHIL_VS_CENT_MEMORY_CD4_TCELL_UP	59	-0.414884	-1.83614	0
986	WP_LUNG_FIBROSIS	21	-0.565617	-1.8366	0
987	JOHNSTONE_PARVB_TARGETS_2_UP	53	-0.460921	-1.83698	0
988	GOBP_RESPONSE_TO_OXYGEN_LEVELS	119	-0.394272	-1.8377	0
989	PECE_MAMMARY_STEM_CELL_DN	49	-0.478326	-1.83844	0
990	WP_EPITHELIAL_TO_MESENCHYMAL_TRANSITION_IN_COLORECTAL_CANCER	45	-0.464392	-1.83857	0
991	HALLMARK_APICAL_JUNCTION	77	-0.437245	-1.83874	0
992	GSE24142_EARLY_THYMIC_PROGENITOR_VS_DN2_THYMOCYTE_FETAL_UP	50	-0.452663	-1.8389	0
993	GOBP_NEGATIVE_REGULATION_OF_CYTOKINE_PRODUCTION	83	-0.410953	-1.83964	0
994	GSE21379_WT_VS_SAP_KO_TFH_CD4_TCELL_UP	49	-0.461381	-1.83971	0
995	GSE27786_CD8_TCELL_VS_NKCELL_DN	56	-0.450918	-1.83977	0
996	GSE16385_MONOCYTE_VS_12H_ROSIGLITAZONE_TREATED_MACROPHAGE_UP	45	-0.44263	-1.83979	0
997	MIKKELSEN_ES_ICP_WITH_H3K4ME3	162	-0.377859	-1.83999	0
998	GSE43863_TFH_VS_LY6C_LOW_CXCR5NEG_EFFECTOR_CD4_TCELL_UP	61	-0.463675	-1.84014	0
999	REACTOME_CLASS_A_1_RHODOPSIN_LIKE_RECEPTORS	36	-0.53435	-1.84063	0
1000	GSE39820_CTRL_VS_TGFBETA3_IL6_CD4_TCELL_DN	70	-0.420525	-1.8408	0
1001	MODULE_399	15	-0.582364	-1.84086	0
1002	GNF2_CD53	19	-0.604808	-1.84145	0
1003	GSE5542_UNTREATED_VS_IFNA_AND_IFNG_TREATED_EPITHELIAL_CELLS_6H_DN	67	-0.405372	-1.84179	0
1004	CHYLA_CBFA2T3_TARGETS_UP	82	-0.414971	-1.84214	0
1005	RODRIGUES_THYROID_CARCINOMA_POORLY_DIFFERENTIATED_DN	232	-0.358024	-1.84277	0
1006	GSE37301_HEMATOPOIETIC_STEM_CELL_VS_PRO_BCELL_UP	54	-0.45173	-1.84322	0
1007	GOBP_TYROSINE_PHOSPHORYLATION_OF_STAT_PROTEIN	20	-0.565259	-1.84369	0
1008	GARGALOVIC_RESPONSE_TO_OXIDIZED_PHOSPHOLIPIDS_BLUE_UP	44	-0.491458	-1.84382	0
1009	GOBP_MYELOID_LEUKOCYTE_DIFFERENTIATION	56	-0.438359	-1.84397	0
1010	GOBP_REGULATION_OF_ANATOMICAL_STRUCTURE_SIZE	143	-0.380098	-1.84474	0
1011	GSE22527_ANTI_CD3_INVIVO_VS_UNTREATED_MOUSE_TREG_UP	47	-0.470378	-1.84548	0
1012	HP_APLASIA_HYPOPLASIA_OF_THE_SKIN	58	-0.47334	-1.8456	0
1013	GSE41176_UNSTIM_VS_ANTI_IGM_STIM_BCELL_1H_DN	54	-0.437131	-1.84577	0
1014	GSE29618_BCELL_VS_MDC_DAY7_FLU_VACCINE_DN	58	-0.460789	-1.8459	0
1015	LI_WILMS_TUMOR_VS_FETAL_KIDNEY_2_DN	23	-0.560726	-1.84638	0
1016	GOBP_HOMOTYPIC_CELL_CELL_ADHESION	27	-0.559133	-1.84717	0
1017	GSE39556_CD8A_DC_VS_NK_CELL_DN	50	-0.450497	-1.84798	0
1018	HP_ERYTHEMA	30	-0.523803	-1.84798	0
1019	GOBP_RESPONSE_TO_ENDOGENOUS_STIMULUS	427	-0.336245	-1.84949	0
1020	GOBP_INOSITOL_PHOSPHATE_MEDIATED_SIGNALING	20	-0.540158	-1.84977	0
1021	GOMF_HEPARIN_BINDING	43	-0.478513	-1.85031	0
1022	GSE35543_IN_VITRO_ITREG_VS_CONVERTED_EX_ITREG_DN	58	-0.429108	-1.85092	0
1023	HP_LOCALIZED_SKIN_LESION	206	-0.36704	-1.85138	0
1024	GSE7852_THYMUS_VS_FAT_TCONV_DN	61	-0.461561	-1.85165	0
1025	GSE15659_CD45RA_NEG_CD4_TCELL_VS_NONSUPPRESSIVE_TCELL_DN	42	-0.473343	-1.85166	0
1026	GSE22935_WT_VS_MYD88_KO_MACROPHAGE_UP	57	-0.471998	-1.85169	0
1027	GSE10325_LUPUS_BCELL_VS_LUPUS_MYELOID_DN	66	-0.436493	-1.8517	0
1028	HP_SKIN_NODULE	34	-0.542517	-1.85224	0
1029	HP_FLEXION_CONTRACTURE_OF_DIGIT	80	-0.426884	-1.8524	0
1030	MODULE_111	34	-0.476388	-1.8525	0
1031	GSE24634_TEFF_VS_TCONV_DAY10_IN_CULTURE_DN	63	-0.448994	-1.85269	0
1032	MODULE_60	114	-0.385098	-1.85272	0
1033	HP_MISALIGNMENT_OF_TEETH	76	-0.404669	-1.85278	0
1034	GSE21360_SECONDARY_VS_QUATERNARY_MEMORY_CD8_TCELL_UP	56	-0.453158	-1.85315	0
1035	GSE15930_STIM_VS_STIM_AND_IL12_48H_CD8_T_CELL_DN	71	-0.436707	-1.85319	0
1036	OSWALD_HEMATOPOIETIC_STEM_CELL_IN_COLLAGEN_GEL_DN	78	-0.403862	-1.85392	0
1037	GOBP_NEGATIVE_REGULATION_OF_IMMUNE_EFFECTOR_PROCESS	33	-0.511096	-1.85441	0
1038	GOMF_CELL_ADHESION_MEDIATOR_ACTIVITY	21	-0.56783	-1.85446	0
1039	KEGG_RENAL_CELL_CARCINOMA	18	-0.556107	-1.85465	0
1040	GOCC_PHAGOCYTIC_VESICLE	37	-0.503052	-1.85478	0
1041	GSE33292_WT_VS_TCF1_KO_DN3_THYMOCYTE_UP	51	-0.436358	-1.85497	0
1042	HOWLIN_PUBERTAL_MAMMARY_GLAND	20	-0.574597	-1.85524	0
1043	NATSUME_RESPONSE_TO_INTERFERON_BETA_DN	20	-0.563779	-1.85553	0
1044	GSE24142_DN2_VS_DN3_THYMOCYTE_ADULT_UP	65	-0.434313	-1.85562	0
1045	BASAKI_YBX1_TARGETS_UP	128	-0.388153	-1.85565	0
1046	CUI_DEVELOPING_HEART_TRABECULAR_VENTRICULAR_CARDIOMYOCYTE	35	-0.488519	-1.85617	0
1047	GSE2405_S_AUREUS_VS_A_PHAGOCYTOPHILUM_NEUTROPHIL_UP	52	-0.468892	-1.85618	0
1048	GSE7852_LN_VS_FAT_TREG_DN	67	-0.451541	-1.85645	0
1049	GSE43955_1H_VS_60H_ACT_CD4_TCELL_DN	62	-0.443535	-1.85661	0
1050	BURTON_ADIPOGENESIS_9	37	-0.521103	-1.85707	0
1051	GSE18791_UNSTIM_VS_NEWCATSLE_VIRUS_DC_18H_DN	51	-0.474852	-1.85738	0
1052	GOMF_GROWTH_FACTOR_RECEPTOR_BINDING	39	-0.51172	-1.85758	0
1053	WELCSH_BRCA1_TARGETS_UP	56	-0.448619	-1.85863	0
1054	GOBP_RESPONSE_TO_MOLECULE_OF_BACTERIAL_ORIGIN	89	-0.426299	-1.85876	0
1055	ODONNELL_TFRC_TARGETS_UP	93	-0.402245	-1.85917	0
1056	ICHIBA_GRAFT_VERSUS_HOST_DISEASE_D7_UP	32	-0.51685	-1.86017	0
1057	GSE1432_1H_VS_24H_IFNG_MICROGLIA_UP	66	-0.429227	-1.86029	0
1058	MIYAGAWA_TARGETS_OF_EWSR1_ETS_FUSIONS_UP	82	-0.430354	-1.86078	0
1059	MILI_PSEUDOPODIA_HAPTOTAXIS_DN	232	-0.362688	-1.86082	0
1060	GSE19401_UNSTIM_VS_RETINOIC_ACID_AND_PAM2CSK4_STIM_FOLLICULAR_DC_DN	62	-0.436745	-1.86089	0
1061	GSE5589_WT_VS_IL6_KO_LPS_AND_IL6_STIM_MACROPHAGE_45MIN_DN	57	-0.474075	-1.86117	0
1062	GSE21360_NAIVE_VS_QUATERNARY_MEMORY_CD8_TCELL_DN	59	-0.445621	-1.86135	0
1063	BARIS_THYROID_CANCER_DN	25	-0.553002	-1.86274	0
1064	GOBP_SMOOTH_MUSCLE_CONTRACTION	24	-0.562909	-1.86282	0
1065	MIR4793_5P	16	-0.607883	-1.86336	0
1066	GOBP_VIRAL_LIFE_CYCLE	84	-0.414359	-1.86412	0
1067	GOBP_RESPONSE_TO_BMP	44	-0.475867	-1.86498	0
1068	LAKE_ADULT_KIDNEY_C4_PROXIMAL_TUBULE_EPITHELIAL_CELLS_S2	50	-0.468644	-1.86524	0
1069	GSE19923_E2A_KO_VS_E2A_AND_HEB_KO_DP_THYMOCYTE_DN	53	-0.460639	-1.86534	0
1070	GOCC_AZUROPHIL_GRANULE	40	-0.480735	-1.86541	0
1071	DOANE_RESPONSE_TO_ANDROGEN_DN	87	-0.421818	-1.86563	0
1072	GSE2405_0H_VS_1.5H_A_PHAGOCYTOPHILUM_STIM_NEUTROPHIL_UP	66	-0.436286	-1.86599	0
1073	GSE20754_WT_VS_TCF1_KO_MEMORY_CD8_TCELL_UP	50	-0.450876	-1.86604	0
1074	LEE_METASTASIS_AND_ALTERNATIVE_SPLICING_UP	32	-0.505634	-1.86627	0
1075	CAIRO_LIVER_DEVELOPMENT_UP	47	-0.474672	-1.86722	0
1076	DURANTE_ADULT_OLFACTORY_NEUROEPITHELIUM_NK_CELLS	18	-0.605171	-1.8675	0
1077	WP_P53_TRANSCRIPTIONAL_GENE_NETWORK	28	-0.508775	-1.86799	0
1078	ZWANG_EGF_INTERVAL_DN	55	-0.45205	-1.86892	0
1079	GOBP_PLASMA_MEMBRANE_ORGANIZATION	36	-0.517325	-1.86894	0
1080	GOBP_REGULATION_OF_CELL_JUNCTION_ASSEMBLY	73	-0.402742	-1.86905	0
1081	GSE3982_MAST_CELL_VS_BASOPHIL_DN	47	-0.472126	-1.87159	0
1082	HP_MACULE	23	-0.584672	-1.87191	0
1083	GOBP_MESENCHYME_DEVELOPMENT	75	-0.448581	-1.8724	0
1084	GSE25088_IL4_VS_IL4_AND_ROSIGLITAZONE_STIM_STAT6_KO_MACROPHAGE_DAY10_DN	58	-0.454853	-1.87251	0
1085	HP_DYSPNEA	104	-0.406749	-1.87287	0
1086	TRAVAGLINI_LUNG_BRONCHIAL_VESSEL_2_CELL	109	-0.409432	-1.87306	0
1087	GOCC_PLATELET_ALPHA_GRANULE_LUMEN	19	-0.604351	-1.87315	0
1088	BOYLAN_MULTIPLE_MYELOMA_PCA1_UP	30	-0.552498	-1.87348	0
1089	GOBP_POSITIVE_REGULATION_OF_SIGNALING	450	-0.335119	-1.87351	0
1090	GSE9509_LPS_VS_LPS_AND_IL10_STIM_IL10_KO_MACROPHAGE_20MIN_UP	37	-0.492693	-1.87378	0
1091	GOBP_LEUKOCYTE_CHEMOTAXIS	48	-0.491241	-1.87381	0
1092	GSE9037_WT_VS_IRAK4_KO_BMDM_UP	73	-0.463426	-1.87403	0
1093	ROY_WOUND_BLOOD_VESSEL_UP	24	-0.532119	-1.87404	0
1094	AMIT_SERUM_RESPONSE_60_MCF10A	21	-0.585253	-1.87443	0
1095	KERLEY_RESPONSE_TO_CISPLATIN_UP	18	-0.600484	-1.87461	0
1096	GSE22886_TH1_VS_TH2_48H_ACT_DN	54	-0.461485	-1.87472	0
1097	GSE41176_UNSTIM_VS_ANTI_IGM_STIM_BCELL_3H_UP	43	-0.47261	-1.87511	0
1098	LEONARD_HYPOXIA	17	-0.630654	-1.87534	0
1099	GOBP_NEGATIVE_REGULATION_OF_CELL_SUBSTRATE_ADHESION	22	-0.549904	-1.87545	0
1100	GOBP_POSITIVE_REGULATION_OF_LYMPHOCYTE_DIFFERENTIATION	27	-0.54609	-1.87573	0
1101	ATF2_S_UP.V1_DN	57	-0.456548	-1.87589	0
1102	MODULE_345	25	-0.577093	-1.87606	0
1103	BEGUM_TARGETS_OF_PAX3_FOXO1_FUSION_UP	24	-0.560597	-1.87639	0
1104	TRAVAGLINI_LUNG_CAPILLARY_INTERMEDIATE_2_CELL	119	-0.420717	-1.8765	0
1105	GOBP_REGULATION_OF_VASOCONSTRICTION	17	-0.658332	-1.87709	0
1106	HP_ABNORMALITY_OF_BLADDER_MORPHOLOGY	21	-0.593145	-1.87729	0
1107	GOBP_REGULATION_OF_MONONUCLEAR_CELL_MIGRATION	29	-0.541587	-1.87733	0
1108	MANNO_MIDBRAIN_NEUROTYPES_HMGL	164	-0.390618	-1.87768	0
1109	PGF_UP.V1_UP	53	-0.456639	-1.87826	0
1110	GOBP_EYE_MORPHOGENESIS	39	-0.493842	-1.8783	0
1111	HINATA_NFKB_TARGETS_FIBROBLAST_UP	28	-0.526779	-1.87896	0
1112	HP_JOINT_LAXITY	66	-0.440455	-1.87906	0
1113	HATADA_METHYLATED_IN_LUNG_CANCER_UP	75	-0.42542	-1.87908	0
1114	GSE29949_DC_BRAIN_VS_MONOCYTE_BONE_MARROW_UP	67	-0.432026	-1.87922	0
1115	MODULE_27	86	-0.442659	-1.87928	0
1116	GSE15330_WT_VS_IKAROS_KO_GRANULOCYTE_MONOCYTE_PROGENITOR_DN	62	-0.437767	-1.87946	0
1117	GSE14000_UNSTIM_VS_4H_LPS_DC_TRANSLATED_RNA_DN	52	-0.480067	-1.87951	0
1118	HP_ABNORMAL_PULMONARY_VALVE_PHYSIOLOGY	36	-0.477719	-1.87956	0
1119	DAVICIONI_MOLECULAR_ARMS_VS_ERMS_DN	52	-0.450595	-1.87986	0
1120	GOCC_CELL_CELL_JUNCTION	155	-0.393685	-1.88001	0
1121	GSE17721_LPS_VS_PAM3CSK4_24H_BMDC_UP	69	-0.430105	-1.8802	0
1122	GSE43955_1H_VS_42H_ACT_CD4_TCELL_WITH_TGFB_IL6_DN	59	-0.44722	-1.8803	0
1123	GOBP_BONE_DEVELOPMENT	55	-0.460941	-1.88068	0
1124	HP_CONGESTIVE_HEART_FAILURE	56	-0.460145	-1.88136	0
1125	GOBP_PLATELET_DEGRANULATION	36	-0.508018	-1.88143	0
1126	GSE22601_IMMATURE_CD4_SINGLE_POSITIVE_VS_CD8_SINGLE_POSITIVE_THYMOCYTE_DN	73	-0.437307	-1.88149	0
1127	HUPER_BREAST_BASAL_VS_LUMINAL_DN	21	-0.555347	-1.88205	0
1128	GSE8868_SPLEEN_VS_INTESTINE_CD11B_POS_CD11C_NEG_DC_DN	59	-0.447571	-1.88218	0
1129	SCHAEFFER_PROSTATE_DEVELOPMENT_48HR_DN	111	-0.408817	-1.88327	0
1130	GSE3920_IFNA_VS_IFNB_TREATED_ENDOTHELIAL_CELL_DN	41	-0.477958	-1.88364	0
1131	REACTOME_REGULATION_OF_INSULIN_LIKE_GROWTH_FACTOR_IGF_TRANSPORT_AND_UPTAKE_BY_ INSULIN_LIKE_GROWTH_FACTOR_BINDING_PROTEINS_IGFBPS	34	-0.490823	-1.88468	0
1132	GOBP_NEGATIVE_REGULATION_OF_IMMUNE_SYSTEM_PROCESS	115	-0.420579	-1.88523	0
1133	AIZARANI_LIVER_C4_EPCAM_POS_BILE_DUCT_CELLS_1	63	-0.452713	-1.88573	0
1134	INGRAM_SHH_TARGETS_DN	24	-0.591989	-1.88594	0
1135	LINDSTEDT_DENDRITIC_CELL_MATURATION_A	15	-0.640192	-1.88595	0
1136	GSE15930_STIM_VS_STIM_AND_TRICHOSTATINA_48H_CD8_T_CELL_UP	66	-0.439993	-1.88726	0
1137	REACTOME_RESPONSE_TO_ELEVATED_PLATELET_CYTOSOLIC_CA2	38	-0.520556	-1.8876	0
1138	GSE13485_DAY7_VS_DAY21_YF17D_VACCINE_PBMC_UP	70	-0.445282	-1.88799	0
1139	GOBP_CARDIAC_VENTRICLE_DEVELOPMENT	29	-0.525621	-1.88892	0
1140	GSE2770_IL12_AND_TGFB_VS_IL4_TREATED_ACT_CD4_TCELL_2H_UP	61	-0.423096	-1.88986	0
1141	GNF2_MYD88	16	-0.639339	-1.89089	0
1142	GSE2826_WT_VS_BTK_KO_BCELL_DN	62	-0.448172	-1.89098	0
1143	MARSON_FOXP3_TARGETS_UP	24	-0.522585	-1.89166	0
1144	GOBP_PATHWAY_RESTRICTED_SMAD_PROTEIN_PHOSPHORYLATION	15	-0.59812	-1.89232	0
1145	HAY_BONE_MARROW_IMMATURE_NEUTROPHIL	66	-0.443078	-1.89291	0
1146	BERENJENO_ROCK_SIGNALING_NOT_VIA_RHOA_DN	24	-0.58165	-1.8931	0
1147	GSE15330_HSC_VS_MEGAKARYOCYTE_ERYTHROID_PROGENITOR_IKAROS_KO_UP	67	-0.422917	-1.89337	0
1148	GSE45365_NK_CELL_VS_BCELL_MCMV_INFECTION_DN	45	-0.479622	-1.89363	0
1149	GSE17721_0.5H_VS_4H_CPG_BMDC_DN	52	-0.482812	-1.89398	0
1150	GSE45365_WT_VS_IFNAR_KO_CD11B_DC_MCMV_INFECTION_DN	47	-0.453008	-1.8948	0
1151	CUI_DEVELOPING_HEART_5TH_WEEK_ATRIAL_CARDIOMYOCYTE	18	-0.548957	-1.89484	0
1152	HP_ABNORMAL_VASCULAR_PHYSIOLOGY	81	-0.426227	-1.89491	0
1153	CHEBOTAEV_GR_TARGETS_DN	44	-0.541775	-1.89495	0
1154	PRMT5_TARGET_GENES	27	-0.535978	-1.89519	0
1155	GOBP_POSITIVE_REGULATION_OF_MONONUCLEAR_CELL_MIGRATION	18	-0.598889	-1.89519	0
1156	GSE26488_CTRL_VS_PEPTIDE_INJECTION_HDAC7_DELTAP_TG_OT2_THYMOCYTE_UP	41	-0.516871	-1.89573	0
1157	GSE25085_FETAL_BM_VS_ADULT_BM_SP4_THYMIC_IMPLANT_UP	61	-0.447583	-1.89646	0
1158	HP_ALOPECIA	59	-0.454631	-1.89669	0
1159	GSE15659_NAIVE_VS_PTPRC_NEG_CD4_TCELL_DN	35	-0.477496	-1.89705	0
1160	GSE19888_ADENOSINE_A3R_INH_VS_TCELL_MEMBRANES_ACT_MAST_CELL_UP	52	-0.496644	-1.89706	0
1161	MENON_FETAL_KIDNEY_6_COLLECTING_DUCT_CELLS	31	-0.517665	-1.89818	0
1162	VANHARANTA_UTERINE_FIBROID_UP	20	-0.580922	-1.89837	0
1163	SRF_Q6	75	-0.434151	-1.89851	0
1164	HP_MICRODONTIA	24	-0.558375	-1.89885	0
1165	GOBP_REGULATION_OF_PROTEIN_PHOSPHORYLATION	296	-0.359628	-1.8989	0
1166	GOBP_INFLAMMATORY_RESPONSE	178	-0.386788	-1.89923	0
1167	GALINDO_IMMUNE_RESPONSE_TO_ENTEROTOXIN	35	-0.498003	-1.89929	0
1168	BLUM_RESPONSE_TO_SALIRASIB_UP	75	-0.444762	-1.90038	0
1169	GSE39110_UNTREATED_VS_IL2_TREATED_CD8_TCELL_DAY6_POST_IMMUNIZATION_UP	53	-0.461129	-1.90039	0
1170	TARTE_PLASMA_CELL_VS_B_LYMPHOCYTE_UP	26	-0.539676	-1.90061	0
1171	VERRECCHIA_DELAYED_RESPONSE_TO_TGFB1	17	-0.65899	-1.90083	0
1172	GOCC_BLOOD_MICROPARTICLE	28	-0.532212	-1.90127	0
1173	TAKEDA_TARGETS_OF_NUP98_HOXA9_FUSION_8D_UP	45	-0.501075	-1.90132	0
1174	GSE30971_CTRL_VS_LPS_STIM_MACROPHAGE_WBP7_KO_4H_UP	49	-0.471484	-1.90191	0
1175	BUSSLINGER_GASTRIC_IMMATURE_PIT_CELLS	59	-0.480074	-1.90211	0
1176	GOBP_DEFENSE_RESPONSE_TO_VIRUS	65	-0.453169	-1.90215	0
1177	HP_SPARSE_HAIR	77	-0.44153	-1.9023	0
1178	GSE6269_HEALTHY_VS_FLU_INF_PBMC_DN	49	-0.471433	-1.90341	0
1179	WNT_UP.V1_DN	42	-0.484654	-1.90411	0
1180	ESC_V6.5_UP_LATE.V1_UP	45	-0.462711	-1.90427	0
1181	INGRAM_SHH_TARGETS_UP	42	-0.489853	-1.90437	0
1182	GOBP_INTEGRIN_MEDIATED_SIGNALING_PATHWAY	36	-0.532625	-1.90439	0
1183	WEST_ADRENOCORTICAL_TUMOR_DN	167	-0.387142	-1.90475	0
1184	MATSUMIYA_PBMC_MODIFIED_VACCINIA_ANKARA_VACCINE_AGE_18_55YO_VACCINATED_VS_ CONTROL_TREATED_IN_VITRO_WITH_MVA85A_6HR_UP	29	-0.532026	-1.90492	0
1185	MODULE_118	146	-0.39078	-1.90508	0
1186	MIR6828_3P	29	-0.527795	-1.90599	0
1187	MCBRYAN_PUBERTAL_BREAST_3_4WK_UP	63	-0.461113	-1.90648	0
1188	GOBP_POSITIVE_REGULATION_OF_INTRACELLULAR_SIGNAL_TRANSDUCTION	266	-0.37162	-1.90741	0
1189	GOBP_REGULATION_OF_CYTOSOLIC_CALCIUM_ION_CONCENTRATION	63	-0.456267	-1.90766	0
1190	GSE19198_CTRL_VS_IL21_TREATED_TCELL_1H_DN	63	-0.457955	-1.9077	0
1191	MIR4804_3P	20	-0.624878	-1.90782	0
1192	GOBP_REGULATION_OF_INTRINSIC_APOPTOTIC_SIGNALING_PATHWAY	49	-0.483938	-1.90783	0
1193	HP_JOINT_CONTRACTURE_OF_THE_HAND	68	-0.437245	-1.908	0
1194	HP_ABNORMAL_ADIPOSE_TISSUE_MORPHOLOGY	40	-0.52246	-1.90823	0
1195	WP_GPCRS_CLASS_A_RHODOPSINLIKE	28	-0.535134	-1.90861	0
1196	DELASERNA_MYOD_TARGETS_DN	21	-0.619383	-1.90984	0
1197	GOBP_INNATE_IMMUNE_RESPONSE	205	-0.387174	-1.91086	0
1198	GOMF_ENDOPEPTIDASE_ACTIVITY	74	-0.43178	-1.91133	0
1199	VERHAAK_AML_WITH_NPM1_MUTATED_UP	46	-0.500515	-1.91157	0
1200	ZHOU_INFLAMMATORY_RESPONSE_LPS_UP	98	-0.399487	-1.91159	0
1201	GOBP_REGULATION_OF_MUSCLE_SYSTEM_PROCESS	54	-0.450497	-1.91165	0
1202	SENGUPTA_NASOPHARYNGEAL_CARCINOMA_WITH_LMP1_DN	37	-0.50882	-1.91181	0
1203	GSE42088_UNINF_VS_LEISHMANIA_INF_DC_24H_DN	66	-0.438382	-1.91218	0
1204	GSE3337_CTRL_VS_16H_IFNG_IN_CD8POS_DC_UP	49	-0.495419	-1.9122	0
1205	GOBP_I_KAPPAB_KINASE_NF_KAPPAB_SIGNALING	85	-0.428957	-1.91259	0
1206	LAKE_ADULT_KIDNEY_C6_PROXIMAL_TUBULE_EPITHELIAL_CELLS_FIBRINOGEN_POS_S3	59	-0.451263	-1.9126	0
1207	REACTOME_G_ALPHA_Q_SIGNALLING_EVENTS	38	-0.481811	-1.91275	0
1208	GSE7831_UNSTIM_VS_INFLUENZA_STIM_PDC_4H_UP	59	-0.430002	-1.91294	0
1209	GSE24634_TREG_VS_TCONV_POST_DAY3_IL4_CONVERSION_DN	56	-0.486907	-1.91306	0
1210	PSMB5_TARGET_GENES	99	-0.423923	-1.91337	0
1211	GOBP_CELL_MIGRATION	405	-0.35507	-1.91355	0
1212	GOBP_SECRETION	354	-0.345708	-1.91412	0
1213	GOBP_EMBRYO_DEVELOPMENT	268	-0.362986	-1.91416	0
1214	HP_ABNORMAL_CAROTID_ARTERY_MORPHOLOGY	21	-0.56811	-1.91499	0
1215	GSE21670_UNTREATED_VS_TGFB_TREATED_CD4_TCELL_DN	49	-0.459372	-1.91555	0
1216	GOBP_EXTRINSIC_APOPTOTIC_SIGNALING_PATHWAY	70	-0.451413	-1.91561	0
1217	WP_AGERAGE_PATHWAY	19	-0.597479	-1.91578	0
1218	NADLER_OBESITY_UP	28	-0.526222	-1.91614	0
1219	MARTIN_NFKB_TARGETS_UP	16	-0.634566	-1.91618	0
1220	GOBP_REGULATION_OF_BMP_SIGNALING_PATHWAY	29	-0.567943	-1.91691	0
1221	MASSARWEH_TAMOXIFEN_RESISTANCE_UP	170	-0.388832	-1.91706	0
1222	CEBP_Q2_01	62	-0.437056	-1.9171	0
1223	LAKE_ADULT_KIDNEY_C29_UNKNOWN_NOVEL_PT_CFH_POS_SUBPOPULATION_S2	27	-0.561166	-1.9172	0
1224	GSE7548_DAY7_VS_DAY28_PCC_IMMUNIZATION_CD4_TCELL_UP	66	-0.445666	-1.91727	0
1225	GOBP_RENAL_SYSTEM_PROCESS	25	-0.563653	-1.91796	0
1226	GROSS_HYPOXIA_VIA_ELK3_DN	51	-0.495728	-1.9183	0
1227	GOBP_NEGATIVE_REGULATION_OF_RESPONSE_TO_STIMULUS	444	-0.358758	-1.91847	0
1228	GSE2197_CPG_DNA_VS_UNTREATED_IN_DC_UP	52	-0.465017	-1.91849	0
1229	GSE11057_NAIVE_VS_EFF_MEMORY_CD4_TCELL_DN	81	-0.427186	-1.9187	0
1230	GOCC_CELL_SURFACE	199	-0.379359	-1.91904	0
1231	GOBP_MUSCLE_CELL_DIFFERENTIATION	105	-0.414716	-1.91907	0
1232	NAGASHIMA_NRG1_SIGNALING_UP	64	-0.452206	-1.91921	0
1233	GSE39864_WT_VS_GATA3_KO_TREG_UP	61	-0.460078	-1.91936	0
1234	GOBP_POSITIVE_REGULATION_OF_PROTEIN_PHOSPHORYLATION	200	-0.398553	-1.91961	0
1235	GOBP_NEGATIVE_REGULATION_OF_PEPTIDASE_ACTIVITY	59	-0.458233	-1.91974	0
1236	BLANCO_MELO_COVID19_SARS_COV_2_POS_PATIENT_LUNG_TISSUE_UP	25	-0.548281	-1.92021	0
1237	BOYLAN_MULTIPLE_MYELOMA_C_D_DN	76	-0.451804	-1.92027	0
1238	GSE1460_DP_THYMOCYTE_VS_NAIVE_CD4_TCELL_ADULT_BLOOD_DN	58	-0.462249	-1.9207	0
1239	PLASARI_TGFB1_TARGETS_10HR_DN	88	-0.443615	-1.92081	0
1240	GSE22140_HEALTHY_VS_ARTHRITIC_GERMFREE_MOUSE_CD4_TCELL_DN	77	-0.439722	-1.92093	0
1241	TAZ_TARGET_GENES	120	-0.397095	-1.92175	0
1242	TRAVAGLINI_LUNG_LIPOFIBROBLAST_CELL	59	-0.482684	-1.92225	0
1243	GOBP_RESPONSE_TO_ESTROGEN	24	-0.562417	-1.92321	0
1244	GSE17721_LPS_VS_GARDIQUIMOD_24H_BMDC_UP	50	-0.464101	-1.9237	0
1245	GSE7509_DC_VS_MONOCYTE_UP	69	-0.422579	-1.92397	0
1246	GOBP_REGULATION_OF_LEUKOCYTE_MIGRATION	53	-0.501263	-1.92448	0
1247	GOMF_METALLOPEPTIDASE_ACTIVITY	31	-0.529974	-1.92469	0
1248	GOBP_REGULATION_OF_TUBE_SIZE	33	-0.541081	-1.92479	0
1249	GSE13484_12H_UNSTIM_VS_YF17D_VACCINE_STIM_PBMC_DN	57	-0.468256	-1.92542	0
1250	GOBP_POSITIVE_REGULATION_OF_MULTICELLULAR_ORGANISMAL_PROCESS	356	-0.360117	-1.9255	0
1251	SMID_BREAST_CANCER_BASAL_DN	212	-0.370549	-1.92582	0
1252	GSE22025_TGFB1_VS_TGFB1_AND_PROGESTERONE_TREATED_CD4_TCELL_DN	58	-0.461531	-1.92608	0
1253	OKUMURA_INFLAMMATORY_RESPONSE_LPS	53	-0.451125	-1.92657	0
1254	GOBP_BASEMENT_MEMBRANE_ORGANIZATION	16	-0.648073	-1.927	0
1255	HP_PES_VALGUS	18	-0.57442	-1.92706	0
1256	HUANG_GATA2_TARGETS_UP	49	-0.471949	-1.92737	0
1257	LEF1_UP.V1_UP	59	-0.468998	-1.92754	0
1258	GOBP_CARDIAC_MUSCLE_TISSUE_DEVELOPMENT	56	-0.470859	-1.9279	0
1259	GOCC_PLATELET_ALPHA_GRANULE	25	-0.595587	-1.92822	0
1260	GSE2585_CTEC_VS_MTEC_THYMUS_DN	53	-0.490127	-1.92951	0
1261	GOBP_ZYMOGEN_ACTIVATION	15	-0.650595	-1.92955	0
1262	HP_RENAL_INSUFFICIENCY	64	-0.461411	-1.92959	0
1263	WP_TGFBETA_RECEPTOR_SIGNALING	15	-0.70811	-1.93015	0
1264	HP_ABNORMAL_CORONARY_ARTERY_MORPHOLOGY	16	-0.613922	-1.93037	0
1265	HP_APLASIA_HYPOPLASIA_OF_THE_EYEBROW	36	-0.540376	-1.93137	0
1266	REACTOME_CARGO_RECOGNITION_FOR_CLATHRIN_MEDIATED_ENDOCYTOSIS	26	-0.523091	-1.93151	0
1267	GOBP_ADAPTIVE_THERMOGENESIS	41	-0.484726	-1.93201	0
1268	PEDRIOLI_MIR31_TARGETS_DN	89	-0.43857	-1.93276	0
1269	GNF2_ITGB2	16	-0.637636	-1.93307	0
1270	GOBP_NEGATIVE_REGULATION_OF_ENDOTHELIAL_CELL_PROLIFERATION	15	-0.642226	-1.93357	0
1271	GHANDHI_DIRECT_IRRADIATION_UP	29	-0.558326	-1.93373	0
1272	GSE13522_WT_VS_IFNAR_KO_SKING_T_CRUZI_Y_STRAIN_INF_UP	58	-0.462163	-1.93377	0
1273	GOMF_GROWTH_FACTOR_ACTIVITY	41	-0.519742	-1.93386	0
1274	KYNG_ENVIRONMENTAL_STRESS_RESPONSE_UP	16	-0.6898	-1.93409	0
1275	BUYTAERT_PHOTODYNAMIC_THERAPY_STRESS_DN	217	-0.381902	-1.93434	0
1276	AIZARANI_LIVER_C20_LSECS_3	99	-0.415828	-1.93438	0
1277	HP_TISSUE_ISCHEMIA	35	-0.530264	-1.93463	0
1278	GOBP_CORNIFICATION	16	-0.615236	-1.93541	0
1279	NABA_COLLAGENS	19	-0.590561	-1.9355	0
1280	GOBP_ERYTHROCYTE_HOMEOSTASIS	32	-0.541485	-1.93554	0
1281	GSE19888_CTRL_VS_TCELL_MEMBRANES_ACT_MAST_CELL_PRETREAT_A3R_INH_DN	59	-0.475857	-1.93587	0
1282	GOLDRATH_NAIVE_VS_MEMORY_CD8_TCELL_DN	63	-0.485161	-1.93613	0
1283	GOBP_REGULATION_OF_MULTICELLULAR_ORGANISMAL_DEVELOPMENT	361	-0.363082	-1.93636	0
1284	GOCC_INTERMEDIATE_FILAMENT_CYTOSKELETON	26	-0.563015	-1.93656	0
1285	GOBP_PLATELET_ACTIVATION	43	-0.516622	-1.93704	0
1286	WAMUNYOKOLI_OVARIAN_CANCER_GRADES_1_2_DN	30	-0.574842	-1.93785	0
1287	GSE19512_NAUTRAL_VS_INDUCED_TREG_DN	44	-0.494604	-1.93847	0
1288	HALLMARK_KRAS_SIGNALING_UP	54	-0.474612	-1.93858	0
1289	GSE26890_CXCR1_NEG_VS_POS_EFFECTOR_CD8_TCELL_UP	69	-0.456311	-1.93901	0
1290	GOBP_CARDIAC_CHAMBER_MORPHOGENESIS	33	-0.544503	-1.93923	0
1291	AIZARANI_LIVER_C11_HEPATOCYTES_1	54	-0.481665	-1.93976	0
1292	KEGG_TGF_BETA_SIGNALING_PATHWAY	24	-0.547166	-1.94041	0
1293	MIR2113	57	-0.457158	-1.94056	0
1294	JIANG_TIP30_TARGETS_UP	15	-0.627969	-1.94058	0
1295	WATANABE_RECTAL_CANCER_RADIOTHERAPY_RESPONSIVE_DN	41	-0.495136	-1.94082	0
1296	GOBP_NEGATIVE_REGULATION_OF_MYELOID_LEUKOCYTE_DIFFERENTIATION	16	-0.61823	-1.94106	0
1297	GOBP_KERATINOCYTE_DIFFERENTIATION	37	-0.521546	-1.94202	0
1298	REACTOME_INTERFERON_SIGNALING	59	-0.476876	-1.94264	0
1299	GARCIA_PINERES_PBMC_HPV_16_L1_VLP_AGE_18_25YO_STIMULATED_VS_UNSTIMULATED_0DY_ VACCINATION_INDEPENDENT_UP	77	-0.466445	-1.94314	0
1300	HP_ABNORMAL_SYSTEMIC_BLOOD_PRESSURE	111	-0.432289	-1.94424	0
1301	GOBP_MORPHOGENESIS_OF_AN_EPITHELIUM	153	-0.404084	-1.94473	0
1302	GSE43955_1H_VS_10H_ACT_CD4_TCELL_WITH_TGFB_IL6_DN	69	-0.446223	-1.94486	0
1303	GOBP_MUSCLE_TISSUE_DEVELOPMENT	102	-0.424218	-1.94511	0
1304	RICKMAN_METASTASIS_DN	80	-0.421032	-1.94538	0
1305	FLECHNER_BIOPSY_KIDNEY_TRANSPLANT_REJECTED_VS_OK_UP	15	-0.635954	-1.94559	0
1306	GOBP_EPITHELIUM_DEVELOPMENT	290	-0.368533	-1.94588	0
1307	GSE3565_CTRL_VS_LPS_INJECTED_SPLENOCYTES_UP	59	-0.470816	-1.94632	0
1308	GOBP_CELL_SUBSTRATE_ADHESION	123	-0.425472	-1.94677	0
1309	TGANTCA_AP1_C	295	-0.368631	-1.94691	0
1310	HALLMARK_MYOGENESIS	56	-0.471682	-1.94708	0
1311	GSE26030_TH1_VS_TH17_DAY5_POST_POLARIZATION_UP	62	-0.463301	-1.94711	0
1312	GOBP_REGULATION_OF_ENDOTHELIAL_CELL_MIGRATION	51	-0.472572	-1.94761	0
1313	DESCARTES_MAIN_FETAL_EXTRAVILLOUS_TROPHOBLASTS	37	-0.523767	-1.94798	0
1314	SENGUPTA_NASOPHARYNGEAL_CARCINOMA_UP	107	-0.416048	-1.94807	0
1315	SRF_C	65	-0.458406	-1.94833	0
1316	GSE9960_HEALTHY_VS_GRAM_POS_SEPSIS_PBMC_DN	57	-0.46638	-1.94839	0
1317	HP_CARIOUS_TEETH	38	-0.506268	-1.9486	0
1318	MCBRYAN_PUBERTAL_BREAST_4_5WK_UP	94	-0.462531	-1.94897	0
1319	PILON_KLF1_TARGETS_UP	127	-0.405818	-1.94936	0
1320	MODULE_112	59	-0.476513	-1.94947	0
1321	GOCC_VESICLE_LUMEN	83	-0.437752	-1.95033	0
1322	GNF2_PTPRC	19	-0.608111	-1.95073	0
1323	BLANCO_MELO_BRONCHIAL_EPITHELIAL_CELLS_INFLUENZA_A_INFECTION_UP	37	-0.495037	-1.95103	0
1324	OLSSON_E2F3_TARGETS_DN	17	-0.608587	-1.95143	0
1325	GSE18791_CTRL_VS_NEWCASTLE_VIRUS_DC_6H_DN	62	-0.506741	-1.95144	0
1326	MEISSNER_NPC_HCP_WITH_H3_UNMETHYLATED	111	-0.427882	-1.95185	0
1327	CHIARADONNA_NEOPLASTIC_TRANSFORMATION_KRAS_CDC25_UP	22	-0.593554	-1.9519	0
1328	TRAVAGLINI_LUNG_OLR1_CLASSICAL_MONOCYTE_CELL	245	-0.370817	-1.95262	0
1329	GOBP_POSITIVE_REGULATION_OF_NF_KAPPAB_TRANSCRIPTION_FACTOR_ACTIVITY	45	-0.478779	-1.95267	0
1330	WP_HIPPOMERLIN_SIGNALING_DYSREGULATION	28	-0.56187	-1.95294	0
1331	HP_ABNORMAL_URINE_PROTEIN_LEVEL	36	-0.518312	-1.95299	0
1332	GOBP_EMBRYO_IMPLANTATION	17	-0.630997	-1.95319	0
1333	GOBP_RESPONSE_TO_MECHANICAL_STIMULUS	61	-0.472713	-1.95342	0
1334	GOBP_REGULATION_OF_EPITHELIAL_CELL_MIGRATION	65	-0.485449	-1.9538	0
1335	GSE36392_TYPE_2_MYELOID_VS_NEUTROPHIL_IL25_TREATED_LUNG_UP	50	-0.469911	-1.95387	0
1336	GOBP_TISSUE_REMODELING	49	-0.496082	-1.95387	0
1337	WP_VITAMIN_D_RECEPTOR_PATHWAY	36	-0.504681	-1.95401	0
1338	GSE9509_LPS_VS_LPS_AND_IL10_STIM_IL10_KO_MACROPHAGE_10MIN_UP	57	-0.469576	-1.95545	0
1339	KIM_RESPONSE_TO_TSA_AND_DECITABINE_UP	34	-0.539489	-1.95559	0
1340	ENGELMANN_CANCER_PROGENITORS_UP	16	-0.648107	-1.95593	0
1341	HP_SCARRING	45	-0.492951	-1.95647	0
1342	GOMF_GROWTH_FACTOR_BINDING	43	-0.50967	-1.95707	0
1343	GSE24634_IL4_VS_CTRL_TREATED_NAIVE_CD4_TCELL_DAY3_DN	68	-0.459022	-1.95777	0
1344	GSE9988_LOW_LPS_VS_VEHICLE_TREATED_MONOCYTE_UP	44	-0.513287	-1.95789	0
1345	GSE1460_INTRATHYMIC_T_PROGENITOR_VS_CD4_THYMOCYTE_DN	54	-0.468198	-1.9583	0
1346	GSE7460_TREG_VS_TCONV_ACT_UP	43	-0.530168	-1.95891	0
1347	RODRIGUES_THYROID_CARCINOMA_ANAPLASTIC_UP	229	-0.380912	-1.95956	0
1348	CHICAS_RB1_TARGETS_SENESCENT	178	-0.393937	-1.95967	0
1349	GSE24142_DN2_VS_DN3_THYMOCYTE_FETAL_DN	59	-0.458948	-1.96014	0
1350	FAN_OVARY_CL5_HEALTHY_SELECTABLE_FOLLICLE_THECAL_CELL	115	-0.426415	-1.96018	0
1351	KAN_RESPONSE_TO_ARSENIC_TRIOXIDE	53	-0.488349	-1.96054	0
1352	GOBP_MULTI_MULTICELLULAR_ORGANISM_PROCESS	61	-0.463404	-1.96158	0
1353	KANG_IMMORTALIZED_BY_TERT_UP	36	-0.525131	-1.96206	0
1354	WIERENGA_STAT5A_TARGETS_UP	67	-0.482272	-1.96251	0
1355	GSE2706_UNSTIM_VS_8H_R848_DC_DN	57	-0.478696	-1.96257	0
1356	GOBP_REGULATION_OF_PROTEIN_LOCALIZATION_TO_PLASMA_MEMBRANE	41	-0.50906	-1.96287	0
1357	GOBP_KERATINIZATION	17	-0.629691	-1.96405	0
1358	MODULE_433	18	-0.64255	-1.96425	0
1359	CSR_EARLY_UP.V1_DN	33	-0.534027	-1.96435	0
1360	DURANTE_ADULT_OLFACTORY_NEUROEPITHELIUM_PERICYTES	20	-0.600439	-1.96473	0
1361	GSE36888_UNTREATED_VS_IL2_TREATED_STAT5_AB_KNOCKIN_TCELL_17H_UP	52	-0.481094	-1.96481	0
1362	GOBP_NEGATIVE_REGULATION_OF_RESPONSE_TO_EXTERNAL_STIMULUS	92	-0.427788	-1.96484	0
1363	KIM_WT1_TARGETS_12HR_DN	87	-0.455709	-1.96495	0
1364	GOBP_POSITIVE_REGULATION_OF_WOUND_HEALING	16	-0.619597	-1.96575	0
1365	GOBP_MORPHOGENESIS_OF_A_BRANCHING_STRUCTURE	60	-0.471192	-1.9662	0
1366	NGUYEN_NOTCH1_TARGETS_DN	33	-0.511178	-1.96642	0
1367	HP_ABNORMAL_SPUTUM	27	-0.506314	-1.96672	0
1368	MODULE_259	16	-0.655913	-1.96676	0
1369	GSE17721_PAM3CSK4_VS_GADIQUIMOD_1H_BMDC_UP	52	-0.497855	-1.96759	0
1370	GSE37301_CD4_TCELL_VS_RAG2_KO_NK_CELL_DN	53	-0.480258	-1.96779	0
1371	HOWARD_NEUTROPHIL_INACT_MONOV_INFLUENZA_A_INDONESIA_05_2005_H5N1_AGE_18_49YO_1DY_UP	98	-0.419339	-1.96804	0
1372	GSE15330_HSC_VS_MEGAKARYOCYTE_ERYTHROID_PROGENITOR_IKAROS_KO_DN	46	-0.476416	-1.96933	0
1373	CUI_TCF21_TARGETS_UP	17	-0.666416	-1.96948	0
1374	HP_ARTERIOSCLEROSIS	21	-0.593925	-1.97037	0
1375	MODULE_171	29	-0.562181	-1.97043	0
1376	MODULE_172	24	-0.580809	-1.97083	0
1377	TATAAA_TATA_01	296	-0.364202	-1.97131	0
1378	GSE22140_GERMFREE_VS_SPF_ARTHRITIC_MOUSE_CD4_TCELL_UP	75	-0.478376	-1.97161	0
1379	PODAR_RESPONSE_TO_ADAPHOSTIN_UP	53	-0.49045	-1.9718	0
1380	FULCHER_INFLAMMATORY_RESPONSE_LECTIN_VS_LPS_DN	131	-0.431118	-1.97201	0
1381	GSE34515_CD16_POS_MONOCYTE_VS_DC_DN	53	-0.466976	-1.97231	0
1382	GOBP_CARDIAC_CHAMBER_DEVELOPMENT	41	-0.483032	-1.97284	0
1383	JOHNSTONE_PARVB_TARGETS_1_DN	23	-0.577996	-1.973	0
1384	HINATA_NFKB_TARGETS_KERATINOCYTE_UP	34	-0.513643	-1.97303	0
1385	MODULE_33	99	-0.419434	-1.97403	0
1386	BUSSLINGER_GASTRIC_MATURE_PIT_CELLS	75	-0.45923	-1.97498	0
1387	GSE5679_CTRL_VS_PPARG_LIGAND_ROSIGLITAZONE_AND_RARA_AGONIST_AM580_TREATED_DC_DN	68	-0.475934	-1.97541	0
1388	RPS14_DN.V1_UP	47	-0.52974	-1.97544	0
1389	GSE21360_PRIMARY_VS_TERTIARY_MEMORY_CD8_TCELL_DN	65	-0.475902	-1.97558	0
1390	MODULE_292	25	-0.563673	-1.97571	0
1391	LAKE_ADULT_KIDNEY_C8_DECENDING_THIN_LIMB	109	-0.437496	-1.9759	0
1392	GSE26495_NAIVE_VS_PD1LOW_CD8_TCELL_DN	73	-0.441963	-1.97592	0
1393	FURUKAWA_DUSP6_TARGETS_PCI35_UP	21	-0.562878	-1.9764	0
1394	ZHOU_INFLAMMATORY_RESPONSE_LIVE_UP	126	-0.414858	-1.97697	0
1395	GSE7852_TREG_VS_TCONV_THYMUS_UP	62	-0.455173	-1.97762	0
1396	GSE9988_ANTI_TREM1_VS_VEHICLE_TREATED_MONOCYTES_UP	73	-0.452295	-1.97772	0
1397	PID_HIF1_TFPATHWAY	24	-0.591947	-1.9779	0
1398	GOBP_CELL_CELL_JUNCTION_ORGANIZATION	62	-0.452277	-1.97804	0
1399	GSE24671_CTRL_VS_BAKIMULC_INFECTED_MOUSE_SPLENOCYTES_DN	47	-0.528382	-1.97894	0
1400	GOBP_REGULATION_OF_CELL_MATRIX_ADHESION	47	-0.463287	-1.97901	0
1401	GENTILE_UV_HIGH_DOSE_DN	86	-0.425775	-1.97916	0
1402	GOBP_MYELOID_LEUKOCYTE_MIGRATION	56	-0.475009	-1.97933	0
1403	HP_ABNORMAL_AORTIC_VALVE_CUSP_MORPHOLOGY	31	-0.521764	-1.98045	0
1404	GSE9988_ANTI_TREM1_AND_LPS_VS_CTRL_TREATED_MONOCYTES_UP	57	-0.511926	-1.98107	0
1405	HP_ABNORMAL_ATRIOVENTRICULAR_VALVE_PHYSIOLOGY	50	-0.49091	-1.98112	0
1406	GSE25123_WT_VS_PPARG_KO_MACROPHAGE_UP	50	-0.486488	-1.98159	0
1407	REACTOME_COLLAGEN_BIOSYNTHESIS_AND_MODIFYING_ENZYMES	25	-0.586424	-1.98178	0
1408	PEDERSEN_METASTASIS_BY_ERBB2_ISOFORM_7	144	-0.399406	-1.98196	0
1409	GSE2706_UNSTIM_VS_8H_LPS_AND_R848_DC_DN	52	-0.487662	-1.982	0
1410	HOWARD_MONOCYTE_INACT_MONOV_INFLUENZA_A_INDONESIA_05_2005_H5N1_AGE_18_49YO_1DY_UP	65	-0.49442	-1.98221	0
1411	GOBP_POSITIVE_REGULATION_OF_PHOSPHORUS_METABOLIC_PROCESS	239	-0.390382	-1.98313	0
1412	GSE3565_CTRL_VS_LPS_INJECTED_DUSP1_KO_SPLENOCYTES_UP	53	-0.479549	-1.9833	0
1413	HP_ABNORMAL_CARDIOVASCULAR_SYSTEM_PHYSIOLOGY	302	-0.368321	-1.98371	0
1414	GOBP_PROTEIN_PROCESSING	57	-0.473909	-1.98375	0
1415	DACOSTA_UV_RESPONSE_VIA_ERCC3_COMMON_DN	131	-0.416761	-1.98392	0
1416	REACTOME_KERATINIZATION	15	-0.637299	-1.98429	0
1417	LEE_LIVER_CANCER_E2F1_UP	23	-0.602925	-1.98443	0
1418	WP_VEGFAVEGFR2_SIGNALING_PATHWAY	141	-0.409229	-1.9852	0
1419	RADMACHER_AML_PROGNOSIS	29	-0.584707	-1.98521	0
1420	PATEL_SKIN_OF_BODY_ZOSTAVAX_AGE_70_93YO_VZV_CHALLENGE_3DY_UP	28	-0.576591	-1.98564	0
1421	MEK_UP.V1_UP	74	-0.453694	-1.98812	0
1422	GSE3982_MAST_CELL_VS_TH2_UP	58	-0.502876	-1.98823	0
1423	HP_INCREASED_BLOOD_PRESSURE	92	-0.459162	-1.98853	0
1424	GSE43955_10H_VS_60H_ACT_CD4_TCELL_WITH_TGFB_IL6_DN	66	-0.464692	-1.98874	0
1425	GSE7852_THYMUS_VS_FAT_TREG_DN	51	-0.454235	-1.9891	0
1426	HES2_TARGET_GENES	338	-0.361806	-1.98911	0
1427	GNF2_HLA_C	16	-0.657996	-1.98912	0
1428	GOBP_HEART_DEVELOPMENT	149	-0.418867	-1.98922	0
1429	GSE3982_BASOPHIL_VS_EFF_MEMORY_CD4_TCELL_UP	53	-0.484158	-1.98926	0
1430	TSENG_ADIPOGENIC_POTENTIAL_DN	16	-0.63344	-1.98997	0
1431	GSE2585_CD80_HIGH_VS_LOW_AIRE_KO_MTEC_UP	41	-0.5433	-1.9907	0
1432	GSE29618_PDC_VS_MDC_DN	64	-0.475048	-1.99076	0
1433	GSE3039_ALPHAALPHA_VS_ALPHABETA_CD8_TCELL_UP	63	-0.479976	-1.99085	0
1434	ATATGCA_MIR448	73	-0.462579	-1.99146	0
1435	MILI_PSEUDOPODIA_CHEMOTAXIS_DN	156	-0.414294	-1.99181	0
1436	GOBP_LEUKOCYTE_MIGRATION	116	-0.424148	-1.99244	0
1437	SENESE_HDAC2_TARGETS_UP	39	-0.499375	-1.99266	0
1438	FLECHNER_BIOPSY_KIDNEY_TRANSPLANT_OK_VS_DONOR_UP	175	-0.406348	-1.99268	0
1439	SRC_UP.V1_DN	48	-0.500957	-1.99276	0
1440	HP_LONG_FINGERS	64	-0.478282	-1.99294	0
1441	GSE6259_CD4_TCELL_VS_CD8_TCELL_DN	53	-0.502119	-1.99415	0
1442	FAN_OVARY_CL7_ANGEIOGENIC_ENDOTHELIAL_CELL	98	-0.430054	-1.99424	0
1443	GOCC_ACTIN_CYTOSKELETON	162	-0.405227	-1.99472	0
1444	MODULE_176	50	-0.507404	-1.99564	0
1445	GSE21927_SPLENIC_C26GM_TUMOROUS_VS_BONE_MARROW_MONOCYTES_UP	31	-0.574547	-1.99634	0
1446	GSE9988_LOW_LPS_VS_CTRL_TREATED_MONOCYTE_UP	45	-0.562169	-1.99641	0
1447	HP_CONTRACTURES_OF_THE_JOINTS_OF_THE_LOWER_LIMBS	39	-0.471478	-1.9985	0
1448	GSE360_L_DONOVANI_VS_B_MALAYI_LOW_DOSE_MAC_UP	55	-0.482488	-1.99852	0
1449	MODULE_199	17	-0.639261	-1.99853	0
1450	KEGG_CYTOKINE_CYTOKINE_RECEPTOR_INTERACTION	55	-0.479019	-1.99863	0
1451	GOBP_POSITIVE_REGULATION_OF_SMOOTH_MUSCLE_CELL_PROLIFERATION	32	-0.531515	-1.99956	0
1452	HP_HIGH_NARROW_PALATE	36	-0.535953	-1.99958	0
1453	BROWNE_INTERFERON_RESPONSIVE_GENES	21	-0.592626	-2.00001	0
1454	GOBP_POSITIVE_REGULATION_OF_ENDOTHELIAL_CELL_PROLIFERATION	32	-0.551997	-2.00008	0
1455	FAN_OVARY_CL13_MONOCYTE_MACROPHAGE	142	-0.427296	-2.00035	0
1456	PDGF_UP.V1_DN	21	-0.603895	-2.00048	0
1457	KIM_WT1_TARGETS_8HR_UP	71	-0.459234	-2.00051	0
1458	SATO_SILENCED_BY_METHYLATION_IN_PANCREATIC_CANCER_1	109	-0.429483	-2.00083	0
1459	QUEREC_PBMC_YF_17D_VACCINE_AGE_18_45YO_3DY_UP	21	-0.578947	-2.00168	0
1460	GSE36888_UNTREATED_VS_IL2_TREATED_STAT5_AB_KNOCKIN_TCELL_2H_UP	71	-0.467976	-2.00201	0
1461	RB_P107_DN.V1_UP	53	-0.466235	-2.00215	0
1462	GSE23502_BM_VS_COLON_TUMOR_MYELOID_DERIVED_SUPPRESSOR_CELL_UP	60	-0.491737	-2.00312	0
1463	GSE3982_NEUTROPHIL_VS_CENT_MEMORY_CD4_TCELL_UP	62	-0.486197	-2.00371	0
1464	GSE5542_UNTREATED_VS_IFNA_TREATED_EPITHELIAL_CELLS_24H_UP	72	-0.475886	-2.00464	0
1465	CAHOY_ASTROGLIAL	36	-0.57561	-2.00685	0
1466	GSE7768_OVA_WITH_LPS_VS_OVA_WITH_MPL_IMMUNIZED_MOUSE_WHOLE_SPLEEN_6H_DN	52	-0.503115	-2.0069	0
1467	CHEN_LVAD_SUPPORT_OF_FAILING_HEART_UP	42	-0.515795	-2.00697	0
1468	GOMF_SIGNALING_RECEPTOR_BINDING	363	-0.381776	-2.00741	0
1469	GOBP_POSITIVE_REGULATION_OF_RESPONSE_TO_EXTERNAL_STIMULUS	133	-0.423907	-2.00817	0
1470	HALLMARK_COMPLEMENT	56	-0.481474	-2.00908	0
1471	SARRIO_EPITHELIAL_MESENCHYMAL_TRANSITION_DN	45	-0.480155	-2.0091	0
1472	FAN_OVARY_CL17_PUTATIVE_APOPTOTIC_SMOOTH_MUSCLE_CELL	106	-0.440627	-2.00977	0
1473	AREB6_04	75	-0.454918	-2.01023	0
1474	LAKE_ADULT_KIDNEY_C28_INTERSTITIUM	27	-0.577809	-2.01075	0
1475	WP_FOCAL_ADHESIONPI3KAKTMTORSIGNALING_PATHWAY	87	-0.45159	-2.01107	0
1476	HP_ABNORMAL_BLEEDING	127	-0.430989	-2.01109	0
1477	GOBP_REGULATION_OF_ACTOMYOSIN_STRUCTURE_ORGANIZATION	26	-0.537865	-2.01112	0
1478	LINDGREN_BLADDER_CANCER_CLUSTER_2A_DN	41	-0.505804	-2.01186	0
1479	GSE360_LOW_DOSE_B_MALAYI_VS_M_TUBERCULOSIS_DC_DN	57	-0.472848	-2.01192	0
1480	ELF1_Q6	53	-0.476354	-2.01246	0
1481	ALTEMEIER_RESPONSE_TO_LPS_WITH_MECHANICAL_VENTILATION	32	-0.57169	-2.01251	0
1482	DURAND_STROMA_S_UP	89	-0.456857	-2.01252	0
1483	CHANG_IMMORTALIZED_BY_HPV31_DN	22	-0.574662	-2.01427	0
1484	HP_ABNORMAL_MITRAL_VALVE_PHYSIOLOGY	43	-0.539317	-2.01434	0
1485	SAGIV_CD24_TARGETS_DN	19	-0.637895	-2.01451	0
1486	HAHTOLA_MYCOSIS_FUNGOIDES_CD4_UP	18	-0.633914	-2.01494	0
1487	GOBP_EPIDERMIS_DEVELOPMENT	79	-0.458521	-2.01558	0
1488	HP_CHEST_PAIN	28	-0.599638	-2.01723	0
1489	GSE19888_ADENOSINE_A3R_INH_PRETREAT_AND_ACT_BY_A3R_VS_TCELL_MEMBRANES_ACT_MAST_ CELL_UP	64	-0.475115	-2.01774	0
1490	GOCC_CONTRACTILE_FIBER	68	-0.490059	-2.01812	0
1491	GOBP_REGULATION_OF_CELL_SUBSTRATE_ADHESION	76	-0.463611	-2.01828	0
1492	GOCC_SECRETORY_GRANULE	206	-0.412009	-2.01847	0
1493	GENTILE_UV_LOW_DOSE_DN	28	-0.603566	-2.01962	0
1494	HERNANDEZ_ABERRANT_MITOSIS_BY_DOCETACEL_2NM_UP	19	-0.630707	-2.01971	0
1495	GOCC_SECRETORY_VESICLE	240	-0.390769	-2.01988	0
1496	KIM_MYCN_AMPLIFICATION_TARGETS_DN	37	-0.566683	-2.02008	0
1497	RUTELLA_RESPONSE_TO_HGF_UP	125	-0.424281	-2.02041	0
1498	GOBP_MUSCLE_STRUCTURE_DEVELOPMENT	171	-0.400667	-2.02101	0
1499	BROWNE_HCMV_INFECTION_12HR_DN	27	-0.568951	-2.02152	0
1500	GSE34392_ST2_KO_VS_WT_DAY8_LCMV_EFFECTOR_CD8_TCELL_DN	53	-0.515208	-2.02172	0
1501	KRAS.DF.V1_UP	73	-0.470556	-2.02223	0
1502	WP_ALLOGRAFT_REJECTION	17	-0.629096	-2.02278	0
1503	HP_ARTERIAL_STENOSIS	25	-0.539632	-2.02298	0
1504	GOBP_MYELOID_CELL_DEVELOPMENT	17	-0.612606	-2.02326	0
1505	GOBP_RESPONSE_TO_VIRUS	93	-0.428125	-2.02431	0
1506	OSMAN_BLOOD_CHAD63_KH_AGE_18_50YO_HIGH_DOSE_SUBJECTS_24HR_UP	497	-0.367105	-2.02445	0
1507	GSE37534_UNTREATED_VS_GW1929_TREATED_CD4_TCELL_PPARG1_AND_FOXP3_TRASDUCED_UP	69	-0.481005	-2.02445	0
1508	GOBP_HUMORAL_IMMUNE_RESPONSE	34	-0.521421	-2.02465	0
1509	GOBP_REGULATION_OF_RESPONSE_TO_EXTERNAL_STIMULUS	253	-0.397064	-2.02484	0
1510	SNF5_DN.V1_DN	39	-0.548824	-2.02493	0
1511	CUI_DEVELOPING_HEART_C9_B_T_CELL	37	-0.544525	-2.02512	0
1512	GSE2405_0H_VS_3H_A_PHAGOCYTOPHILUM_STIM_NEUTROPHIL_UP	72	-0.456681	-2.02575	0
1513	STEGER_ADIPOGENESIS_DN	17	-0.663233	-2.02577	0
1514	HP_ABNORMALITY_OF_THE_PLANTAR_SKIN_OF_FOOT	21	-0.624799	-2.02714	0
1515	GSE22886_NAIVE_BCELL_VS_MONOCYTE_DN	78	-0.467778	-2.02715	0
1516	WOO_LIVER_CANCER_RECURRENCE_UP	40	-0.528979	-2.02748	0
1517	PETRETTO_CARDIAC_HYPERTROPHY	20	-0.640807	-2.0291	0
1518	GOBP_IMMUNE_EFFECTOR_PROCESS	297	-0.383123	-2.02912	0
1519	GSE18281_CORTICAL_VS_MEDULLARY_THYMOCYTE_UP	66	-0.477999	-2.0292	0
1520	GOBP_DEFENSE_RESPONSE_TO_BACTERIUM	36	-0.561614	-2.03044	0
1521	REACTOME_SIGNALING_BY_MET	28	-0.585645	-2.03099	0
1522	HP_TALL_STATURE	54	-0.481502	-2.03136	0
1523	PRC2_EZH2_UP.V1_DN	61	-0.478532	-2.03192	0
1524	GOMF_INTEGRIN_BINDING	47	-0.511892	-2.03227	0
1525	GOBP_POSITIVE_CHEMOTAXIS	26	-0.552695	-2.03235	0
1526	MARCHINI_TRABECTEDIN_RESISTANCE_DN	22	-0.597503	-2.03315	0
1527	GSE6092_IFNG_VS_IFNG_AND_B_BURGDORFERI_INF_ENDOTHELIAL_CELL_DN	39	-0.515037	-2.03363	0
1528	FAN_EMBRYONIC_CTX_BRAIN_MYELOID	43	-0.512119	-2.03391	0
1529	HELLER_SILENCED_BY_METHYLATION_UP	73	-0.466151	-2.03496	0
1530	WP_EBOLA_VIRUS_PATHWAY_ON_HOST	43	-0.55602	-2.03505	0
1531	GOBP_REGULATION_OF_PEPTIDYL_SERINE_PHOSPHORYLATION	33	-0.560523	-2.03574	0
1532	HP_ABNORMAL_PHALANGEAL_JOINT_MORPHOLOGY_OF_THE_HAND	57	-0.485427	-2.03657	0
1533	FRIDMAN_IMMORTALIZATION_DN	15	-0.700989	-2.0366	0
1534	FAN_OVARY_CL1_GPRC5A_TNFRS12A_HIGH_SELECTABLE_FOLLICLE_STROMAL_CELL	152	-0.441786	-2.03681	0
1535	GSE9988_LPS_VS_VEHICLE_TREATED_MONOCYTE_UP	43	-0.503968	-2.03714	0
1536	MODULE_220	76	-0.474864	-2.03737	0
1537	GOBP_TRANSFORMING_GROWTH_FACTOR_BETA_PRODUCTION	18	-0.639847	-2.03768	0
1538	BURTON_ADIPOGENESIS_PEAK_AT_0HR	26	-0.605089	-2.0379	0
1539	FAN_OVARY_CL14_MATURE_SMOOTH_MUSCLE_CELL	130	-0.439414	-2.03827	0
1540	MODULE_146	15	-0.675652	-2.03844	0
1541	GSE1432_CTRL_VS_IFNG_24H_MICROGLIA_DN	68	-0.490555	-2.03872	0
1542	HP_VASCULAR_DILATATION	56	-0.508378	-2.03895	0
1543	MONNIER_POSTRADIATION_TUMOR_ESCAPE_DN	118	-0.443591	-2.03952	0
1544	LINDGREN_BLADDER_CANCER_HIGH_RECURRENCE	23	-0.602067	-2.03974	0
1545	GSE360_L_DONOVANI_VS_M_TUBERCULOSIS_MAC_DN	60	-0.479948	-2.04005	0
1546	DELPUECH_FOXO3_TARGETS_UP	21	-0.638247	-2.04181	0
1547	DESCARTES_FETAL_LIVER_STELLATE_CELLS	38	-0.575792	-2.04198	0
1548	GSE9601_NFKB_INHIBITOR_VS_PI3K_INHIBITOR_TREATED_HCMV_INF_MONOCYTE_DN	65	-0.498804	-2.04248	0
1549	MODULE_19	114	-0.41937	-2.04337	0
1550	GOBP_RESPONSE_TO_BIOTIC_STIMULUS	344	-0.375345	-2.0449	0
1551	HP_VASCULAR_SKIN_ABNORMALITY	138	-0.438611	-2.04532	0
1552	BROWNE_HCMV_INFECTION_2HR_DN	24	-0.611266	-2.04567	0
1553	GOCC_ADHERENS_JUNCTION	61	-0.520131	-2.04572	0
1554	LAKE_ADULT_KIDNEY_C9_THIN_ASCENDING_LIMB	104	-0.440431	-2.04578	0
1555	GOBP_INTERLEUKIN_8_PRODUCTION	28	-0.589344	-2.04601	0
1556	MODULE_234	15	-0.643444	-2.04621	0
1557	WANG_ESOPHAGUS_CANCER_VS_NORMAL_UP	50	-0.520609	-2.04809	0
1558	KAYO_CALORIE_RESTRICTION_MUSCLE_UP	39	-0.557496	-2.04855	0
1559	NAKAMURA_ADIPOGENESIS_EARLY_UP	20	-0.633076	-2.04885	0
1560	GSE17974_IL4_AND_ANTI_IL12_VS_UNTREATED_6H_ACT_CD4_TCELL_DN	43	-0.511415	-2.04898	0
1561	JISON_SICKLE_CELL_DISEASE_UP	56	-0.489818	-2.04913	0
1562	PID_ANGIOPOIETIN_RECEPTOR_PATHWAY	18	-0.622211	-2.04918	0
1563	GOBP_RESPONSE_TO_GROWTH_FACTOR	215	-0.400364	-2.04982	0
1564	DAUER_STAT3_TARGETS_DN	22	-0.62813	-2.05002	0
1565	GOBP_BIOLOGICAL_ADHESION	443	-0.361391	-2.05027	0
1566	GOMF_PHOSPHATIDYLSERINE_BINDING	19	-0.631944	-2.05109	0
1567	AIZARANI_LIVER_C7_EPCAM_POS_BILE_DUCT_CELLS_2	88	-0.451479	-2.05128	0
1568	MODULE_164	17	-0.672943	-2.05166	0
1569	PID_P53_DOWNSTREAM_PATHWAY	38	-0.534268	-2.05217	0
1570	SRF_Q5_01	68	-0.494903	-2.05385	0
1571	GSE19401_UNSTIM_VS_PAM2CSK4_STIM_FOLLICULAR_DC_DN	59	-0.476907	-2.05418	0
1572	GOBP_ENDODERM_DEVELOPMENT	29	-0.583972	-2.05523	0
1573	GSE360_CTRL_VS_L_DONOVANI_DC_DN	47	-0.500874	-2.05529	0
1574	REACTOME_CELL_JUNCTION_ORGANIZATION	33	-0.560884	-2.05564	0
1575	REACTOME_CYTOKINE_SIGNALING_IN_IMMUNE_SYSTEM	187	-0.403336	-2.05611	0
1576	GSE29618_BCELL_VS_MDC_DN	74	-0.4658	-2.0569	0
1577	LINDGREN_BLADDER_CANCER_CLUSTER_3_DN	60	-0.508313	-2.05828	0
1578	HP_JOINT_STIFFNESS	47	-0.48882	-2.05862	0
1579	GOBP_NEGATIVE_REGULATION_OF_MULTICELLULAR_ORGANISMAL_PROCESS	261	-0.401002	-2.05876	0
1580	GSE21927_SPLEEN_C57BL6_VS_4T1_TUMOR_BALBC_MONOCYTES_DN	71	-0.48726	-2.05883	0
1581	MISSIAGLIA_REGULATED_BY_METHYLATION_UP	38	-0.535414	-2.05939	0
1582	BRUINS_UVC_RESPONSE_LATE	320	-0.402147	-2.05956	0
1583	GSE1791_CTRL_VS_NEUROMEDINU_IN_T_CELL_LINE_3H_UP	47	-0.537969	-2.06013	0
1584	HP_ABNORMALITY_OF_THE_GINGIVA	57	-0.512471	-2.06062	0
1585	GOBP_RESPONSE_TO_BACTERIUM	136	-0.435454	-2.06206	0
1586	GSE24142_ADULT_VS_FETAL_DN2_THYMOCYTE_UP	70	-0.486373	-2.06216	0
1587	GOBP_POSITIVE_REGULATION_OF_CELL_ADHESION	122	-0.440035	-2.06297	0
1588	MATSUMIYA_PBMC_MODIFIED_VACCINIA_ANKARA_VACCINE_AGE_18_55YO_2DY_UP	18	-0.614653	-2.063	0
1589	REACTOME_SIGNALING_BY_TGFB_FAMILY_MEMBERS	27	-0.626969	-2.06332	0
1590	GOBP_ENDOTHELIAL_CELL_MIGRATION	65	-0.504736	-2.06336	0
1591	GOBP_REGULATION_OF_RESPONSE_TO_CYTOKINE_STIMULUS	57	-0.518437	-2.06375	0
1592	HP_ABNORMALLY_LAX_OR_HYPEREXTENSIBLE_SKIN	44	-0.559741	-2.06429	0
1593	HAY_BONE_MARROW_PLATELET	52	-0.522723	-2.06432	0
1594	GSE19401_PLN_VS_PEYERS_PATCH_FOLLICULAR_DC_DN	60	-0.47089	-2.06447	0
1595	GOMF_PROTEASE_BINDING	36	-0.54539	-2.06564	0
1596	HP_PLANTAR_HYPERKERATOSIS	15	-0.643108	-2.06628	0
1597	HP_PREMATURELY_AGED_APPEARANCE	30	-0.597093	-2.06641	0
1598	CHIARADONNA_NEOPLASTIC_TRANSFORMATION_CDC25_DN	62	-0.494375	-2.06682	0
1599	FAN_OVARY_CL12_T_LYMPHOCYTE_NK_CELL_2	47	-0.540351	-2.06867	0
1600	MED25_TARGET_GENES	31	-0.549908	-2.06893	0
1601	MARTIN_VIRAL_GPCR_SIGNALING_UP	26	-0.599057	-2.06963	0
1602	DESCARTES_FETAL_THYMUS_VASCULAR_ENDOTHELIAL_CELLS	27	-0.593934	-2.06999	0
1603	RUTELLA_RESPONSE_TO_HGF_VS_CSF2RB_AND_IL4_UP	123	-0.432419	-2.07112	0
1604	GOBP_CELL_MATRIX_ADHESION	76	-0.461324	-2.07219	0
1605	GSE29618_MONOCYTE_VS_PDC_UP	64	-0.47373	-2.07276	0
1606	GOBP_POSITIVE_REGULATION_OF_INTERLEUKIN_6_PRODUCTION	22	-0.609265	-2.07368	0
1607	LAKE_ADULT_KIDNEY_C24_ENDOTHELIAL_CELLS_AEA_AND_DVR	59	-0.489687	-2.07396	0
1608	GOBP_REGULATION_OF_VASCULATURE_DEVELOPMENT	74	-0.477211	-2.07401	0
1609	HP_SPARSE_EYEBROW	24	-0.633562	-2.07441	0
1610	GSE21546_UNSTIM_VS_ANTI_CD3_STIM_DP_THYMOCYTES_UP	74	-0.492962	-2.07492	0
1611	HARALAMBIEVA_PBMC_M_M_R_II_AGE_11_22YO_VACCINATED_VS_UNVACCINATED_7YR_UP	253	-0.396634	-2.07529	0
1612	WIERENGA_STAT5A_TARGETS_GROUP2	18	-0.679451	-2.07549	0
1613	GOMF_ENDOPEPTIDASE_REGULATOR_ACTIVITY	38	-0.530769	-2.07591	0
1614	GOBP_POSITIVE_REGULATION_OF_INTERLEUKIN_8_PRODUCTION	20	-0.641483	-2.07687	0
1615	SMID_BREAST_CANCER_NORMAL_LIKE_UP	116	-0.467707	-2.07754	0
1616	GOBP_DEFENSE_RESPONSE	374	-0.377729	-2.07769	0
1617	HP_PURPURA	24	-0.597724	-2.07791	0
1618	TRAVAGLINI_LUNG_EREG_DENDRITIC_CELL	177	-0.395485	-2.0782	0
1619	GSE360_HIGH_DOSE_B_MALAYI_VS_M_TUBERCULOSIS_MAC_DN	62	-0.478132	-2.07834	0
1620	GSE46606_UNSTIM_VS_CD40L_IL2_IL5_3DAY_STIMULATED_IRF4MID_SORTED_BCELL_DN	55	-0.482311	-2.07849	0
1621	GSE22229_UNTREATED_VS_IMMUNOSUPP_THERAPY_RENAL_TRANSPLANT_PATIENT_PBMC_DN	48	-0.51182	-2.07908	0
1622	GOMF_CYTOKINE_ACTIVITY	45	-0.543956	-2.08017	0
1623	DER_IFN_GAMMA_RESPONSE_UP	25	-0.597139	-2.08059	0
1624	HARRIS_HYPOXIA	29	-0.558559	-2.08086	0
1625	GSE21546_UNSTIM_VS_ANTI_CD3_STIM_ELK1_KO_DP_THYMOCYTES_UP	41	-0.566878	-2.08187	0
1626	LAKE_ADULT_KIDNEY_C23_ENDOTHELIAL_CELLS_AVR	51	-0.519079	-2.08344	0
1627	MYC_UP.V1_DN	49	-0.490602	-2.08426	0
1628	GSE43955_TH0_VS_TGFB_IL6_TH17_ACT_CD4_TCELL_30H_UP	53	-0.515826	-2.08453	0
1629	GOBP_EMBRYONIC_MORPHOGENESIS	158	-0.416979	-2.08522	0
1630	CHIARADONNA_NEOPLASTIC_TRANSFORMATION_CDC25_UP	40	-0.545148	-2.0859	0
1631	GSE20715_0H_VS_24H_OZONE_LUNG_DN	69	-0.47494	-2.08843	0
1632	GSE3039_ALPHAALPHA_CD8_TCELL_VS_B2_BCELL_DN	64	-0.485446	-2.08854	0
1633	GSE14769_UNSTIM_VS_120MIN_LPS_BMDM_DN	70	-0.499729	-2.08931	0
1634	VALK_AML_CLUSTER_9	15	-0.659907	-2.0898	0
1635	COULOUARN_TEMPORAL_TGFB1_SIGNATURE_UP	34	-0.566629	-2.09162	0
1636	CERVERA_SDHB_TARGETS_1_UP	44	-0.525393	-2.09185	0
1637	GSE29618_PDC_VS_MDC_DAY7_FLU_VACCINE_DN	59	-0.503545	-2.09293	0
1638	CERVERA_SDHB_TARGETS_2	37	-0.553633	-2.09306	0
1639	GSE35825_UNTREATED_VS_IFNA_STIM_MACROPHAGE_DN	55	-0.50499	-2.09319	0
1640	GSE15930_STIM_VS_STIM_AND_IFNAB_48H_CD8_T_CELL_DN	63	-0.499111	-2.0949	0
1641	GOBP_TISSUE_MORPHOGENESIS	177	-0.433424	-2.09491	0
1642	GOBP_EPITHELIAL_CELL_PROLIFERATION	111	-0.466237	-2.09513	0
1643	KOHOUTEK_CCNT1_TARGETS	21	-0.628831	-2.09513	0
1644	TRAVAGLINI_LUNG_MESOTHELIAL_CELL	211	-0.422292	-2.09571	0
1645	GSE39820_CTRL_VS_IL1B_IL6_CD4_TCELL_DN	52	-0.494865	-2.09574	0
1646	GOBP_STRIATED_MUSCLE_CELL_DIFFERENTIATION	81	-0.461109	-2.09628	0
1647	REACTOME_MOLECULES_ASSOCIATED_WITH_ELASTIC_FIBRES	16	-0.664406	-2.09698	0
1648	GSE26495_NAIVE_VS_PD1HIGH_CD8_TCELL_DN	73	-0.479421	-2.09735	0
1649	KATSANOU_ELAVL1_TARGETS_UP	50	-0.529362	-2.09788	0
1650	HOWARD_DENDRITIC_CELL_INACT_MONOV_INFLUENZA_A_INDONESIA_05_2005_H5N1_AGE_18_49YO_ 1DY_UP	44	-0.552388	-2.09789	0
1651	GOBP_AMEBOIDAL_TYPE_CELL_MIGRATION	113	-0.449896	-2.09904	0
1652	GSE3920_UNTREATED_VS_IFNG_TREATED_ENDOTHELIAL_CELL_UP	34	-0.559621	-2.09989	0
1653	GSE29618_PRE_VS_DAY7_POST_TIV_FLU_VACCINE_BCELL_UP	46	-0.503337	-2.09999	0
1654	GSE7852_TREG_VS_TCONV_LN_UP	54	-0.512604	-2.10143	0
1655	GSE11961_MEMORY_BCELL_DAY7_VS_GERMINAL_CENTER_BCELL_DAY7_UP	57	-0.50534	-2.1023	0
1656	GSE30971_CTRL_VS_LPS_STIM_MACROPHAGE_WBP7_HET_2H_UP	61	-0.482303	-2.10264	0
1657	REACTOME_MET_PROMOTES_CELL_MOTILITY	19	-0.657214	-2.10429	0
1658	GSE18791_UNSTIM_VS_NEWCATSLE_VIRUS_DC_6H_DN	56	-0.515355	-2.1044	0
1659	HP_ABNORMAL_AORTIC_VALVE_PHYSIOLOGY	41	-0.536128	-2.105	0
1660	GSE22140_GERMFREE_VS_SPF_MOUSE_CD4_TCELL_DN	91	-0.490144	-2.10587	0
1661	TRAVAGLINI_LUNG_MYOFIBROBLAST_CELL	28	-0.634183	-2.10722	0
1662	SENESE_HDAC1_TARGETS_DN	94	-0.469124	-2.10853	0
1663	GOBP_SKELETAL_SYSTEM_DEVELOPMENT	135	-0.445006	-2.10887	0
1664	DESCARTES_FETAL_PLACENTA_IGFBP1_DKK1_POSITIVE_CELLS	37	-0.566932	-2.10889	0
1665	ZHONG_SECRETOME_OF_LUNG_CANCER_AND_ENDOTHELIUM	27	-0.622412	-2.10901	0
1666	MIR3201	26	-0.6206	-2.1092	0
1667	GOBP_POSITIVE_REGULATION_OF_EPITHELIAL_CELL_PROLIFERATION	57	-0.488603	-2.10968	0
1668	HP_ABNORMAL_ORAL_MUCOSA_MORPHOLOGY	79	-0.493446	-2.10977	0
1669	GSE40685_TREG_VS_FOXP3_KO_TREG_PRECURSOR_DN	52	-0.533103	-2.10978	0
1670	GOBP_REGULATION_OF_BLOOD_PRESSURE	48	-0.535487	-2.11228	0
1671	GSE44732_UNSTIM_VS_IL27_STIM_IMATURE_DC_DN	48	-0.512046	-2.11276	0
1672	MODULE_45	148	-0.417319	-2.11318	0
1673	DER_IFN_BETA_RESPONSE_UP	38	-0.57204	-2.11411	0
1674	AIZARANI_LIVER_C17_HEPATOCYTES_3	22	-0.647978	-2.11414	0
1675	PID_ARF6_TRAFFICKING_PATHWAY	16	-0.712943	-2.11419	0
1676	CHEN_METABOLIC_SYNDROM_NETWORK	362	-0.398611	-2.11454	0
1677	APPIERTO_RESPONSE_TO_FENRETINIDE_DN	17	-0.694453	-2.11485	0
1678	GSE22886_CTRL_VS_LPS_24H_DC_DN	62	-0.502373	-2.11532	0
1679	GOBP_MUSCLE_CELL_DEVELOPMENT	52	-0.520216	-2.11645	0
1680	CHARAFE_BREAST_CANCER_BASAL_VS_MESENCHYMAL_DN	22	-0.686261	-2.11662	0
1681	GERHOLD_ADIPOGENESIS_DN	31	-0.576388	-2.11787	0
1682	GOBP_RESPONSE_TO_TYPE_I_INTERFERON	31	-0.595063	-2.11877	0
1683	FULCHER_INFLAMMATORY_RESPONSE_LECTIN_VS_LPS_UP	160	-0.427423	-2.11889	0
1684	HP_GENERALIZED_ABNORMALITY_OF_SKIN	227	-0.40851	-2.12073	0
1685	HU_FETAL_RETINA_RPE	95	-0.455708	-2.12121	0
1686	GSE17721_0.5H_VS_24H_CPG_BMDC_DN	69	-0.51191	-2.12213	0
1687	ACOSTA_PROLIFERATION_INDEPENDENT_MYC_TARGETS_DN	33	-0.540565	-2.12415	0
1688	GSE21774_CD62L_POS_CD56_DIM_VS_CD62L_NEG_CD56_DIM_NK_CELL_UP	51	-0.480614	-2.12569	0
1689	GOBP_CELL_CHEMOTAXIS	72	-0.50445	-2.12601	0
1690	LEIN_CHOROID_PLEXUS_MARKERS	34	-0.582701	-2.12635	0
1691	GSE27434_WT_VS_DNMT1_KO_TREG_DN	64	-0.504029	-2.12642	0
1692	TRAVAGLINI_LUNG_MACROPHAGE_CELL	61	-0.523477	-2.12823	0
1693	GSE22935_WT_VS_MYD88_KO_MACROPHAGE_48H_MBOVIS_BCG_STIM_DN	53	-0.529048	-2.12862	0
1694	GAUCHER_PBMC_YF_VAX_STAMARIL_UNKNOWN_AGE_10DY_UP	75	-0.505308	-2.12916	0
1695	HUMMERICH_SKIN_CANCER_PROGRESSION_UP	32	-0.616326	-2.12969	0
1696	HSIAO_LIVER_SPECIFIC_GENES	44	-0.546013	-2.13037	0
1697	AIZARANI_LIVER_C13_LSECS_2	86	-0.465527	-2.13125	0
1698	STK33_SKM_UP	84	-0.47669	-2.13129	0
1699	GSE17721_0.5H_VS_8H_CPG_BMDC_DN	51	-0.511518	-2.13151	0
1700	REACTOME_CELL_SURFACE_INTERACTIONS_AT_THE_VASCULAR_WALL	39	-0.542891	-2.13167	0
1701	ONDER_CDH1_TARGETS_2_DN	118	-0.427947	-2.13229	0
1702	PHONG_TNF_RESPONSE_NOT_VIA_P38	118	-0.457491	-2.13257	0
1703	WANG_CISPLATIN_RESPONSE_AND_XPC_DN	59	-0.499253	-2.13292	0
1704	HP_SLENDER_FINGER	39	-0.581246	-2.13364	0
1705	FAN_OVARY_CL2_PUTATIVE_EARLY_ATRETIC_FOLLICLE_THECAL_CELL_1	39	-0.577974	-2.13449	0
1706	GOBP_POSITIVE_REGULATION_OF_PEPTIDYL_SERINE_PHOSPHORYLATION	26	-0.581376	-2.13453	0
1707	ATF2_UP.V1_DN	66	-0.493979	-2.13544	0
1708	DE_YY1_TARGETS_DN	34	-0.553074	-2.13544	0
1709	HP_ABNORMALITY_OF_EPIDERMAL_MORPHOLOGY	16	-0.723535	-2.13646	0
1710	GSE28783_ANTI_MIR33_VS_UNTREATED_ATHEROSCLEROSIS_MACROPHAGE_DN	49	-0.518303	-2.13658	0
1711	FLETCHER_PBMC_BCG_10W_INFANT_PPD_STIMULATED_VS_UNSTIMULATED_10W_DN	61	-0.527204	-2.13673	0
1712	NAKAMURA_ADIPOGENESIS_LATE_DN	19	-0.718082	-2.13757	0
1713	LAIHO_COLORECTAL_CANCER_SERRATED_UP	49	-0.537896	-2.13809	0
1714	GOTZMANN_EPITHELIAL_TO_MESENCHYMAL_TRANSITION_UP	31	-0.643751	-2.13869	0
1715	GSE7460_FOXP3_MUT_VS_WT_ACT_TCONV_UP	56	-0.517872	-2.13919	0
1716	GOBP_POSITIVE_REGULATION_OF_EPITHELIAL_CELL_MIGRATION	43	-0.579532	-2.13963	0
1717	PID_FRA_PATHWAY	15	-0.740898	-2.13975	0
1718	HOELZEL_NF1_TARGETS_DN	39	-0.551271	-2.13989	0
1719	GSE11961_FOLLICULAR_BCELL_VS_MEMORY_BCELL_DAY40_DN	60	-0.553561	-2.14109	0
1720	BERENJENO_TRANSFORMED_BY_RHOA_REVERSIBLY_DN	16	-0.728465	-2.14127	0
1721	GSE1740_UNSTIM_VS_IFNA_STIMULATED_MCSF_DERIVED_MACROPHAGE_DN	51	-0.527327	-2.14127	0
1722	FAN_OVARY_CL16_LYMPHATIC_ENDOTHELIAL_CELL	100	-0.483874	-2.14137	0
1723	GOBP_REGULATION_OF_SYSTEMIC_ARTERIAL_BLOOD_PRESSURE_MEDIATED_BY_A_CHEMICAL_SIGNAL	16	-0.681669	-2.14192	0
1724	DUTERTRE_ESTRADIOL_RESPONSE_6HR_DN	33	-0.549587	-2.1423	0
1725	SASSON_RESPONSE_TO_GONADOTROPHINS_DN	42	-0.597985	-2.1442	0
1726	COWLING_MYCN_TARGETS	15	-0.757151	-2.14424	0
1727	GOMF_CYTOKINE_RECEPTOR_BINDING	61	-0.524207	-2.14481	0
1728	DESCARTES_MAIN_FETAL_ENDOCARDIAL_CELLS	31	-0.579506	-2.14492	0
1729	SMID_BREAST_CANCER_LUMINAL_B_DN	145	-0.452226	-2.14511	0
1730	RICKMAN_TUMOR_DIFFERENTIATED_MODERATELY_VS_POORLY_UP	49	-0.562258	-2.14527	0
1731	HAN_SATB1_TARGETS_UP	141	-0.449665	-2.14618	0
1732	GSE24634_TREG_VS_TCONV_POST_DAY5_IL4_CONVERSION_DN	57	-0.511047	-2.14703	0
1733	MODULE_107	21	-0.661804	-2.14742	0
1734	GOBP_REGULATION_OF_CELLULAR_COMPONENT_MOVEMENT	270	-0.406508	-2.14755	0
1735	GAO_ESOPHAGUS_25W_C4_FGFR1HIGH_EPITHELIAL_CELLS	58	-0.531015	-2.14836	0
1736	GSE2128_C57BL6_VS_NOD_CD4CD8_DP_THYMOCYTE_UP	54	-0.553593	-2.15004	0
1737	PID_IL4_2PATHWAY	20	-0.645235	-2.15073	0
1738	NUYTTEN_NIPP1_TARGETS_UP	195	-0.43806	-2.15097	0
1739	REACTOME_INTERFERON_ALPHA_BETA_SIGNALING	20	-0.643086	-2.15222	0
1740	VART_KSHV_INFECTION_ANGIOGENIC_MARKERS_UP	41	-0.543187	-2.15225	0
1741	GOBP_MODULATION_BY_SYMBIONT_OF_ENTRY_INTO_HOST	15	-0.740861	-2.15239	0
1742	REACTOME_COLLAGEN_FORMATION	34	-0.60058	-2.155	0
1743	HP_THICKENED_SKIN	97	-0.48312	-2.15571	0
1744	GOBP_REGULATION_OF_CHEMOTAXIS	52	-0.529705	-2.15664	0
1745	GOBP_TUBE_MORPHOGENESIS	227	-0.41436	-2.15685	0
1746	GSE3982_DC_VS_BCELL_UP	58	-0.527595	-2.15704	0
1747	GOBP_HEART_MORPHOGENESIS	63	-0.512725	-2.15762	0
1748	GSE13484_UNSTIM_VS_3H_YF17D_VACCINE_STIM_PBMC_DN	63	-0.533804	-2.1581	0
1749	MODULE_209	21	-0.696983	-2.15865	0
1750	GSE5589_LPS_VS_LPS_AND_IL10_STIM_IL10_KO_MACROPHAGE_45MIN_UP	62	-0.507662	-2.15897	0
1751	SAMOLS_TARGETS_OF_KHSV_MIRNAS_DN	26	-0.635773	-2.15944	0
1752	GAO_SMALL_INTESTINE_24W_C4_ENTEROCYTE_PROGENITOR_SUBTYPE_2	15	-0.733902	-2.16023	0
1753	ERWIN_COHEN_BLOOD_TC_83_AGE_23_48YO_VACCINATED_VS_CONTROL_2DY_UP	36	-0.560578	-2.16163	0
1754	GOBP_DEFENSE_RESPONSE_TO_OTHER_ORGANISM	243	-0.402108	-2.16229	0
1755	MODULE_121	24	-0.674794	-2.16247	0
1756	HALLMARK_IL2_STAT5_SIGNALING	59	-0.524242	-2.16544	0
1757	BROWNE_HCMV_INFECTION_48HR_DN	144	-0.452404	-2.16608	0
1758	GOMF_CADHERIN_BINDING	111	-0.470932	-2.1665	0
1759	ZWANG_CLASS_2_TRANSIENTLY_INDUCED_BY_EGF	21	-0.649375	-2.16673	0
1760	GSE2935_UV_INACTIVATED_VS_LIVE_SENDAI_VIRUS_INF_MACROPHAGE_DN	58	-0.517134	-2.16689	0
1761	GSE28737_BCL6_HET_VS_BCL6_KO_FOLLICULAR_BCELL_DN	56	-0.542741	-2.16935	0
1762	REACTOME_INTERFERON_GAMMA_SIGNALING	29	-0.645952	-2.16936	0
1763	GSE24634_TEFF_VS_TCONV_DAY5_IN_CULTURE_DN	60	-0.492609	-2.1708	0
1764	WEINMANN_ADAPTATION_TO_HYPOXIA_DN	18	-0.737429	-2.17105	0
1765	MIKKELSEN_IPS_WITH_HCP_H3K27ME3	16	-0.688715	-2.17108	0
1766	BROWN_MYELOID_CELL_DEVELOPMENT_UP	50	-0.543355	-2.17184	0
1767	GSE7460_TCONV_VS_TREG_LN_DN	48	-0.531281	-2.17226	0
1768	GSE13485_DAY3_VS_DAY7_YF17D_VACCINE_PBMC_DN	61	-0.50821	-2.17342	0
1769	GSE36888_STAT5_AB_KNOCKIN_VS_WT_TCELL_IL2_TREATED_17H_DN	56	-0.521892	-2.17354	0
1770	HP_ABNORMALITY_OF_BLOOD_CIRCULATION	83	-0.481237	-2.17397	0
1771	GOBP_SUPRAMOLECULAR_FIBER_ORGANIZATION	211	-0.436706	-2.17521	0
1772	HP_TRANSIENT_ISCHEMIC_ATTACK	22	-0.641458	-2.17568	0
1773	GSE1432_6H_VS_24H_IFNG_MICROGLIA_UP	62	-0.510969	-2.17575	0
1774	GSE17721_ALL_VS_24H_PAM3CSK4_BMDC_DN	58	-0.518652	-2.17595	0
1775	FAN_EMBRYONIC_CTX_BIG_GROUPS_BRAIN_IMMUNE	51	-0.529511	-2.17653	0
1776	GSE9988_ANTI_TREM1_VS_CTRL_TREATED_MONOCYTES_UP	81	-0.497305	-2.17688	0
1777	MODULE_223	41	-0.543204	-2.17857	0
1778	GSE19888_ADENOSINE_A3R_INH_VS_INH_PRETREAT_AND_ACT_WITH_TCELL_MEMBRANES_MAST_CELL_UP	61	-0.519878	-2.1787	0
1779	DESCARTES_FETAL_HEART_EPICARDIAL_FAT_CELLS	18	-0.680709	-2.17983	0
1780	KRASNOSELSKAYA_ILF3_TARGETS_UP	16	-0.700492	-2.18006	0
1781	PID_AVB3_INTEGRIN_PATHWAY	35	-0.611692	-2.18007	0
1782	DACOSTA_UV_RESPONSE_VIA_ERCC3_TTD_DN	26	-0.599229	-2.1822	0
1783	GOBP_POSITIVE_REGULATION_OF_ENDOTHELIAL_CELL_MIGRATION	32	-0.587468	-2.18328	0
1784	GOBP_SKIN_DEVELOPMENT	70	-0.514054	-2.18357	0
1785	MARKEY_RB1_CHRONIC_LOF_DN	36	-0.620045	-2.18407	0
1786	REACTOME_NON_INTEGRIN_MEMBRANE_ECM_INTERACTIONS	23	-0.62706	-2.1851	0
1787	GERY_CEBP_TARGETS	49	-0.541668	-2.18655	0
1788	GOBP_GASTRULATION	57	-0.534114	-2.18759	0
1789	LIU_SMARCA4_TARGETS	23	-0.620646	-2.18792	0
1790	GOBP_REGULATION_OF_SYSTEMIC_ARTERIAL_BLOOD_PRESSURE	26	-0.648689	-2.18794	0
1791	GOBP_BIOLOGICAL_PROCESS_INVOLVED_IN_INTERACTION_WITH_HOST	62	-0.494433	-2.18846	0
1792	WANG_SMARCE1_TARGETS_DN	127	-0.451977	-2.18878	0
1793	GSE42021_CD24INT_VS_CD24LOW_TREG_THYMUS_DN	56	-0.538158	-2.18915	0
1794	REACTOME_COLLAGEN_DEGRADATION	25	-0.628549	-2.18988	0
1795	BROWNE_HCMV_INFECTION_16HR_DN	24	-0.637409	-2.19115	0
1796	GSE1460_CD4_THYMOCYTE_VS_THYMIC_STROMAL_CELL_DN	77	-0.520484	-2.19125	0
1797	HIRSCH_CELLULAR_TRANSFORMATION_SIGNATURE_DN	36	-0.595393	-2.1913	0
1798	TRAVAGLINI_LUNG_AIRWAY_SMOOTH_MUSCLE_CELL	63	-0.513492	-2.19149	0
1799	ESC_J1_UP_LATE.V1_UP	49	-0.526962	-2.19364	0
1800	GSE7768_OVA_ALONE_VS_OVA_WITH_LPS_IMMUNIZED_MOUSE_WHOLE_SPLEEN_6H_DN	58	-0.503689	-2.19385	0
1801	MODULE_521	17	-0.685673	-2.19387	0
1802	ZHANG_RESPONSE_TO_IKK_INHIBITOR_AND_TNF_UP	70	-0.519173	-2.19512	0
1803	LI_WILMS_TUMOR_VS_FETAL_KIDNEY_1_UP	68	-0.524202	-2.19717	0
1804	GOBP_ENZYME_LINKED_RECEPTOR_PROTEIN_SIGNALING_PATHWAY	282	-0.407154	-2.19828	0
1805	GOBP_ANIMAL_ORGAN_MORPHOGENESIS	258	-0.422393	-2.19893	0
1806	MODULE_52	156	-0.466216	-2.20042	0
1807	CSR_LATE_UP.V1_DN	48	-0.560199	-2.20059	0
1808	WGGAATGY_TEF1_Q6	103	-0.488721	-2.20076	0
1809	GOBP_ENDOTHELIAL_CELL_PROLIFERATION	51	-0.547253	-2.20162	0
1810	ERWIN_COHEN_BLOOD_VACCINE_TC_83_AGE_23_48YO_VACCINATED_VS_CONTROL_7DY_UP	26	-0.619582	-2.20181	0
1811	AIZARANI_LIVER_C10_MVECS_1	97	-0.477206	-2.2019	0
1812	PID_SYNDECAN_1_PATHWAY	20	-0.668176	-2.20239	0
1813	CUI_TCF21_TARGETS_2_DN	280	-0.42426	-2.20296	0
1814	GSE17721_0.5H_VS_12H_CPG_BMDC_DN	53	-0.547544	-2.20462	0
1815	HP_ABNORMAL_CARDIAC_VENTRICULAR_FUNCTION	23	-0.65746	-2.20499	0
1816	GOBP_POSITIVE_REGULATION_OF_LEUKOCYTE_MIGRATION	34	-0.608427	-2.20641	0
1817	FORTSCHEGGER_PHF8_TARGETS_DN	229	-0.445218	-2.20714	0
1818	GOBP_COLLAGEN_METABOLIC_PROCESS	30	-0.652297	-2.20812	0
1819	GAUSSMANN_MLL_AF4_FUSION_TARGETS_F_UP	59	-0.560557	-2.20855	0
1820	GOBP_REGULATION_OF_CELLULAR_RESPONSE_TO_GROWTH_FACTOR_STIMULUS	84	-0.479236	-2.20872	0
1821	GSE11057_EFF_MEM_VS_CENT_MEM_CD4_TCELL_UP	64	-0.525867	-2.20978	0
1822	WP_TGFBETA_RECEPTOR_SIGNALLING_IN_SKELETAL_DYSPLASIAS	16	-0.720709	-2.2098	0
1823	VANHARANTA_UTERINE_FIBROID_DN	27	-0.623174	-2.21038	0
1824	CORDENONSI_YAP_CONSERVED_SIGNATURE	27	-0.652482	-2.2108	0
1825	CSR_EARLY_UP.V1_UP	53	-0.54462	-2.21084	0
1826	GOMF_PEPTIDASE_REGULATOR_ACTIVITY	46	-0.559656	-2.21111	0
1827	GSE1460_DP_VS_CD4_THYMOCYTE_DN	68	-0.514719	-2.2113	0
1828	GSE10325_CD4_TCELL_VS_LUPUS_CD4_TCELL_DN	67	-0.499104	-2.21131	0
1829	BAELDE_DIABETIC_NEPHROPATHY_DN	178	-0.434237	-2.21197	0
1830	HP_SPARSE_OR_ABSENT_EYELASHES	19	-0.69442	-2.21284	0
1831	GRAESSMANN_APOPTOSIS_BY_SERUM_DEPRIVATION_UP	176	-0.453148	-2.21329	0
1832	GSE18791_CTRL_VS_NEWCASTLE_VIRUS_DC_8H_DN	57	-0.535211	-2.21431	0
1833	GSE37533_PPARG2_FOXP3_VS_FOXP3_TRANSDUCED_CD4_TCELL_DN	73	-0.511225	-2.21517	0
1834	LAKE_ADULT_KIDNEY_C26_MESANGIAL_CELLS	59	-0.530414	-2.21521	0
1835	VERRECCHIA_EARLY_RESPONSE_TO_TGFB1	28	-0.625641	-2.21558	0
1836	GSE37534_UNTREATED_VS_PIOGLITAZONE_TREATED_CD4_TCELL_PPARG1_AND_FOXP3_TRASDUCED_DN	57	-0.546888	-2.21578	0
1837	DELYS_THYROID_CANCER_UP	152	-0.457239	-2.21707	0
1838	ZHONG_SECRETOME_OF_LUNG_CANCER_AND_FIBROBLAST	47	-0.539619	-2.21728	0
1839	KEGG_HEMATOPOIETIC_CELL_LINEAGE	15	-0.741735	-2.21763	0
1840	GSE36888_UNTREATED_VS_IL2_TREATED_TCELL_17H_DN	62	-0.547366	-2.21806	0
1841	GSE21546_WT_VS_SAP1A_KO_AND_ELK1_KO_ANTI_CD3_STIM_DP_THYMOCYTES_UP	73	-0.512325	-2.21888	0
1842	GOMF_EXTRACELLULAR_MATRIX_STRUCTURAL_CONSTITUENT_CONFERRING_TENSILE_STRENGTH	18	-0.655416	-2.21895	0
1843	DER_IFN_ALPHA_RESPONSE_UP	26	-0.625513	-2.21925	0
1844	HP_ABNORMAL_SCLERA_MORPHOLOGY	34	-0.630726	-2.22037	0
1845	HP_THORACIC_AORTIC_ANEURYSM	31	-0.648725	-2.22054	0
1846	GSE9316_IL6_KO_VS_IFNG_KO_INVIVO_EXPANDED_CD4_TCELL_DN	59	-0.52172	-2.22084	0
1847	NABA_ECM_REGULATORS	47	-0.580784	-2.2223	0
1848	GOMF_CELL_ADHESION_MOLECULE_BINDING	178	-0.449236	-2.22231	0
1849	GSE1112_HY_CD8AB_VS_HY_CD8AA_THYMOCYTE_RTOC_CULTURE_DN	56	-0.524006	-2.22296	0
1850	GSE13485_DAY1_VS_DAY7_YF17D_VACCINE_PBMC_DN	65	-0.529642	-2.22301	0
1851	GOBP_NEGATIVE_REGULATION_OF_TRANSFORMING_GROWTH_FACTOR_BETA_RECEPTOR_ SIGNALING_PATHWAY	29	-0.621205	-2.22313	0
1852	REACTOME_ASSEMBLY_OF_COLLAGEN_FIBRILS_AND_OTHER_MULTIMERIC_STRUCTURES	27	-0.667878	-2.22347	0
1853	GOBP_FORMATION_OF_PRIMARY_GERM_LAYER	39	-0.573005	-2.22347	0
1854	DACOSTA_UV_RESPONSE_VIA_ERCC3_DN	241	-0.443062	-2.22369	0
1855	GSE3982_BASOPHIL_VS_TH2_UP	56	-0.517629	-2.22408	0
1856	REACTOME_MET_ACTIVATES_PTK2_SIGNALING	16	-0.692694	-2.22449	0
1857	TARTE_PLASMA_CELL_VS_PLASMABLAST_UP	102	-0.472822	-2.22494	0
1858	HALLMARK_TGF_BETA_SIGNALING	21	-0.656181	-2.22499	0
1859	GSE1432_1H_VS_6H_IFNG_MICROGLIA_DN	57	-0.552589	-2.22627	0
1860	LI_INDUCED_T_TO_NATURAL_KILLER_UP	97	-0.517231	-2.22684	0
1861	MENSE_HYPOXIA_UP	36	-0.581763	-2.22747	0
1862	ELVIDGE_HIF1A_TARGETS_DN	33	-0.628732	-2.22823	0
1863	MODULE_419	22	-0.68764	-2.22865	0
1864	FLETCHER_PBMC_BCG_10W_INFANT_PPD_STIMULATED_VS_UNSTIMULATED_10W_UP	22	-0.689155	-2.22964	0
1865	MODULE_122	51	-0.564772	-2.23009	0
1866	WALLACE_PROSTATE_CANCER_RACE_UP	72	-0.526731	-2.23246	0
1867	GOBP_ENDODERM_FORMATION	21	-0.700236	-2.23357	0
1868	GSE34156_UNTREATED_VS_6H_NOD2_LIGAND_TREATED_MONOCYTE_DN	56	-0.589196	-2.23393	0
1869	NAKAMURA_ADIPOGENESIS_EARLY_DN	20	-0.702573	-2.23412	0
1870	GOMF_SERINE_TYPE_ENDOPEPTIDASE_INHIBITOR_ACTIVITY	17	-0.65438	-2.23594	0
1871	GOBP_TISSUE_MIGRATION	87	-0.507401	-2.23611	0
1872	GOBP_INTERFERON_GAMMA_MEDIATED_SIGNALING_PATHWAY	34	-0.615253	-2.23721	0
1873	HP_ABNORMAL_ELASTICITY_OF_SKIN	52	-0.536775	-2.23782	0
1874	HP_STROKE	35	-0.606713	-2.23838	0
1875	FLETCHER_PBMC_BCG_10W_INFANT_BCG_STIMULATED_VS_UNSTIMULATED_10W_UP	36	-0.604495	-2.24072	0
1876	JINESH_BLEBBISHIELD_VS_LIVE_CONTROL_DN	89	-0.509492	-2.24082	0
1877	GOBP_REGULATION_OF_LEUKOCYTE_CHEMOTAXIS	27	-0.625375	-2.24084	0
1878	GOCC_COLLAGEN_TRIMER	24	-0.632728	-2.24087	0
1879	BUYTAERT_PHOTODYNAMIC_THERAPY_STRESS_UP	247	-0.421018	-2.24107	0
1880	AMIT_SERUM_RESPONSE_120_MCF10A	23	-0.650898	-2.24112	0
1881	BUSSLINGER_ESOPHAGEAL_LATE_SUPRABASAL_CELLS	34	-0.594812	-2.24123	0
1882	MENON_FETAL_KIDNEY_3_STROMAL_CELLS	40	-0.607369	-2.24172	0
1883	HP_BRUISING_SUSCEPTIBILITY	47	-0.557917	-2.24521	0
1884	NABA_ECM_GLYCOPROTEINS	57	-0.555636	-2.24525	0
1885	GRAHAM_CML_DIVIDING_VS_NORMAL_QUIESCENT_DN	30	-0.667747	-2.24552	0
1886	HP_INTRACRANIAL_HEMORRHAGE	41	-0.563033	-2.24694	0
1887	TRAVAGLINI_LUNG_TREM2_DENDRITIC_CELL	174	-0.447869	-2.24728	0
1888	GOBP_POSITIVE_REGULATION_OF_VASCULATURE_DEVELOPMENT	38	-0.561542	-2.2474	0
1889	GSE1460_INTRATHYMIC_T_PROGENITOR_VS_THYMIC_STROMAL_CELL_DN	78	-0.519277	-2.24785	0
1890	HP_HEMOPTYSIS	19	-0.663742	-2.24808	0
1891	DESCARTES_FETAL_LIVER_MESOTHELIAL_CELLS	71	-0.544932	-2.24981	0
1892	HALLMARK_TNFA_SIGNALING_VIA_NFKB	75	-0.524922	-2.2518	0
1893	SANA_RESPONSE_TO_IFNG_DN	32	-0.610544	-2.25217	0
1894	GOBP_POSITIVE_REGULATION_OF_LEUKOCYTE_CHEMOTAXIS	21	-0.681313	-2.25308	0
1895	GOBP_REGULATION_OF_RESPONSE_TO_WOUNDING	55	-0.546103	-2.25323	0
1896	MIKKELSEN_MEF_LCP_WITH_H3K4ME3	39	-0.613265	-2.25403	0
1897	ANDERSEN_CHOLANGIOCARCINOMA_CLASS2	53	-0.552189	-2.25446	0
1898	FRIDMAN_SENESCENCE_UP	31	-0.669472	-2.25516	0
1899	GAUCHER_PBMC_YF_VAX_STAMARIL_UNKNOWN_AGE_7DY_UP	97	-0.486173	-2.25556	0
1900	MODULE_524	18	-0.674588	-2.25643	0
1901	JECHLINGER_EPITHELIAL_TO_MESENCHYMAL_TRANSITION_UP	34	-0.634563	-2.2565	0
1902	GOBP_POSITIVE_REGULATION_OF_RESPONSE_TO_CYTOKINE_STIMULUS	22	-0.656026	-2.25786	0
1903	HALLMARK_HYPOXIA	62	-0.51597	-2.25934	0
1904	GSE22886_DAY0_VS_DAY1_MONOCYTE_IN_CULTURE_DN	59	-0.530733	-2.25942	0
1905	GOBP_NEGATIVE_REGULATION_OF_RESPONSE_TO_WOUNDING	26	-0.671113	-2.26007	0
1906	LEE_BMP2_TARGETS_UP	223	-0.428165	-2.26133	0
1907	CONCANNON_APOPTOSIS_BY_EPOXOMICIN_UP	86	-0.503863	-2.26135	0
1908	GSE6259_FLT3L_INDUCED_DEC205_POS_DC_VS_CD8_TCELL_DN	52	-0.538992	-2.26188	0
1909	GSE1112_HY_CD8AB_VS_HY_CD8AA_THYMOCYTE_RTOC_CULTURE_UP	39	-0.559214	-2.26247	0
1910	DURANTE_ADULT_OLFACTORY_NEUROEPITHELIUM_VASCULAR_SMOOTH_MUSCLE_CELLS	44	-0.566931	-2.26248	0
1911	GSE42021_TREG_PLN_VS_CD24LO_TREG_THYMUS_DN	69	-0.537634	-2.2627	0
1912	MODULE_23	136	-0.466993	-2.2675	0
1913	MODULE_64	114	-0.519751	-2.2688	0
1914	KHETCHOUMIAN_TRIM24_TARGETS_UP	25	-0.644451	-2.26978	0
1915	GOBP_REGULATION_OF_TRANSMEMBRANE_RECEPTOR_PROTEIN_SERINE_THREONINE_KINASE_ SIGNALING_PATHWAY	73	-0.546154	-2.27033	0
1916	GOBP_BLOOD_VESSEL_MORPHOGENESIS	169	-0.459524	-2.27072	0
1917	TSAI_RESPONSE_TO_RADIATION_THERAPY	17	-0.743164	-2.27078	0
1918	GOBP_ENDOCRINE_PROCESS	20	-0.66502	-2.27081	0
1919	PTEN_DN.V2_UP	30	-0.633261	-2.27187	0
1920	HIRSCH_CELLULAR_TRANSFORMATION_SIGNATURE_UP	94	-0.489291	-2.27398	0
1921	MURARO_PANCREAS_ACINAR_CELL	253	-0.430227	-2.27439	0
1922	BRUECKNER_TARGETS_OF_MIRLET7A3_DN	34	-0.606476	-2.27498	0
1923	HALLMARK_APOPTOSIS	62	-0.540045	-2.27547	0
1924	GOBP_TUBE_DEVELOPMENT	282	-0.422821	-2.27776	0
1925	KOKKINAKIS_METHIONINE_DEPRIVATION_48HR_UP	48	-0.59343	-2.2778	0
1926	MODULE_88	210	-0.445352	-2.27805	0
1927	DESCARTES_FETAL_INTESTINE_SMOOTH_MUSCLE_CELLS	17	-0.732547	-2.27813	0
1928	GSE37533_PPARG1_FOXP3_VS_FOXP3_TRANSDUCED_CD4_TCELL_PIOGLITAZONE_TREATED_UP	68	-0.554374	-2.27853	0
1929	NABA_SECRETED_FACTORS	60	-0.547202	-2.27921	0
1930	KOYAMA_SEMA3B_TARGETS_UP	75	-0.518085	-2.27958	0
1931	THUM_SYSTOLIC_HEART_FAILURE_UP	114	-0.480971	-2.28105	0
1932	EGFR_UP.V1_UP	83	-0.526485	-2.28114	0
1933	DAVICIONI_TARGETS_OF_PAX_FOXO1_FUSIONS_UP	99	-0.508652	-2.28125	0
1934	EBAUER_TARGETS_OF_PAX3_FOXO1_FUSION_UP	52	-0.558502	-2.28227	0
1935	WP_SENESCENCE_AND_AUTOPHAGY_IN_CANCER	40	-0.586155	-2.28261	0
1936	WONG_ENDMETRIUM_CANCER_DN	29	-0.664041	-2.28279	0
1937	GSE13485_PRE_VS_POST_YF17D_VACCINATION_PBMC_DN	64	-0.498417	-2.28279	0
1938	MEBARKI_HCC_PROGENITOR_WNT_UP_CTNNB1_INDEPENDENT	15	-0.766102	-2.28282	0
1939	GOBP_ENTRY_INTO_HOST	45	-0.594617	-2.28373	0
1940	HP_BLUE_SCLERAE	27	-0.653518	-2.28386	0
1941	MODULE_357	20	-0.753307	-2.28515	0
1942	PATEL_SKIN_OF_BODY_ZOSTAVAX_AGE_70_93YO_VZV_CHALLENGE_6HR_UP	78	-0.515601	-2.28573	0
1943	STK33_NOMO_UP	93	-0.527072	-2.28583	0
1944	HP_DILATATION_OF_THE_CEREBRAL_ARTERY	17	-0.784543	-2.28713	0
1945	ZAK_PBMC_MRKAD5_HIV_1_GAG_POL_NEF_AGE_20_50YO_1DY_UP	301	-0.43617	-2.28785	0
1946	DESCARTES_FETAL_ADRENAL_CSH1_CSH2_POSITIVE_CELLS	39	-0.5991	-2.28817	0
1947	GSE13485_CTRL_VS_DAY3_YF17D_VACCINE_PBMC_DN	49	-0.567589	-2.2884	0
1948	YAO_TEMPORAL_RESPONSE_TO_PROGESTERONE_CLUSTER_16	34	-0.636062	-2.29151	0
1949	HOOI_ST7_TARGETS_UP	26	-0.668193	-2.29422	0
1950	KRIGE_RESPONSE_TO_TOSEDOSTAT_24HR_UP	217	-0.449626	-2.29545	0
1951	GSE42021_TCONV_PLN_VS_CD24HI_TCONV_THYMUS_UP	59	-0.537489	-2.2959	0
1952	GAUCHER_PBMC_YF_VAX_STAMARIL_UNKNOWN_AGE_3DY_UP	72	-0.533293	-2.29714	0
1953	HP_HYPERKERATOSIS	57	-0.533548	-2.29775	0
1954	MODULE_321	62	-0.578039	-2.29926	0
1955	RUBENSTEIN_SKELETAL_MUSCLE_ENDOTHELIAL_CELLS	46	-0.573089	-2.29977	0
1956	GOBP_ANATOMICAL_STRUCTURE_FORMATION_INVOLVED_IN_MORPHOGENESIS	286	-0.447062	-2.29984	0
1957	GSE42724_NAIVE_BCELL_VS_PLASMABLAST_UP	64	-0.544502	-2.29993	0
1958	TURASHVILI_BREAST_DUCTAL_CARCINOMA_VS_LOBULAR_NORMAL_UP	27	-0.660445	-2.30123	0
1959	SCHERER_PBMC_APSV_WETVAX_AGE_18_32YO_5_TO_7DY_UP	90	-0.516621	-2.30148	0
1960	MODULE_55	217	-0.453452	-2.30173	0
1961	HP_ABNORMAL_HEART_VALVE_MORPHOLOGY	82	-0.535295	-2.30426	0
1962	HP_SUBCUTANEOUS_NODULE	29	-0.626269	-2.305	0
1963	HP_ATROPHIC_SCARS	15	-0.802897	-2.30521	0
1964	WP_FOCAL_ADHESION	74	-0.540577	-2.30561	0
1965	HP_DERMAL_ATROPHY	31	-0.640544	-2.3064	0
1966	GOZGIT_ESR1_TARGETS_DN	228	-0.44543	-2.30765	0
1967	HP_ABNORMAL_HEART_VALVE_PHYSIOLOGY	88	-0.488033	-2.30814	0
1968	GSE13485_CTRL_VS_DAY7_YF17D_VACCINE_PBMC_DN	62	-0.554625	-2.3086	0
1969	GOBP_VASCULATURE_DEVELOPMENT	204	-0.465703	-2.30988	0
1970	GOBP_COAGULATION	85	-0.531713	-2.31131	0
1971	GSE3039_NKT_CELL_VS_B2_BCELL_DN	68	-0.568425	-2.31176	0
1972	REACTOME_ELASTIC_FIBRE_FORMATION	21	-0.708197	-2.31265	0
1973	WESTON_VEGFA_TARGETS	34	-0.654463	-2.3127	0
1974	TRAVAGLINI_LUNG_CAPILLARY_AEROCYTE_CELL	15	-0.700699	-2.31539	0
1975	HORIUCHI_WTAP_TARGETS_UP	91	-0.504954	-2.31568	0
1976	GRUETZMANN_PANCREATIC_CANCER_UP	139	-0.490116	-2.31619	0
1977	GSE29618_BCELL_VS_MONOCYTE_DN	81	-0.513904	-2.3169	0
1978	GSE2770_TGFB_AND_IL4_ACT_VS_ACT_CD4_TCELL_2H_DN	59	-0.580812	-2.3171	0
1979	KIM_WT1_TARGETS_12HR_UP	66	-0.556494	-2.31754	0
1980	GRAHAM_NORMAL_QUIESCENT_VS_NORMAL_DIVIDING_UP	18	-0.720944	-2.31768	0
1981	TONKS_TARGETS_OF_RUNX1_RUNX1T1_FUSION_HSC_UP	72	-0.532877	-2.31806	0
1982	WP_HUMAN_COMPLEMENT_SYSTEM	18	-0.73877	-2.31823	0
1983	NABA_MATRISOME_ASSOCIATED	132	-0.515893	-2.31959	0
1984	DELACROIX_RARG_BOUND_MEF	120	-0.502908	-2.31982	0
1985	STK33_UP	80	-0.545641	-2.32011	0
1986	COLINA_TARGETS_OF_4EBP1_AND_4EBP2	137	-0.473028	-2.32058	0
1987	PHONG_TNF_RESPONSE_VIA_P38_PARTIAL	68	-0.546506	-2.32316	0
1988	DESCARTES_FETAL_MUSCLE_SMOOTH_MUSCLE_CELLS	22	-0.702327	-2.32428	0
1989	HP_AORTIC_ANEURYSM	43	-0.571118	-2.32468	0
1990	GOCC_ENDOPLASMIC_RETICULUM_LUMEN	88	-0.510629	-2.32483	0
1991	GOMF_RECEPTOR_REGULATOR_ACTIVITY	106	-0.504785	-2.32553	0
1992	FRANCO_BLOOD_SANOFI_PASTEUR_SA_INACTIVATED_INFLUENZA_VACCINE_CORRELATED_ WITH_ANTIBODY_RESPONSE_AGE_18_40YO_1DY_POSITIVE	43	-0.576026	-2.3261	0
1993	REACTOME_O_LINKED_GLYCOSYLATION	21	-0.652533	-2.32811	0
1994	CORRE_MULTIPLE_MYELOMA_UP	23	-0.691786	-2.32828	0
1995	SENESE_HDAC1_TARGETS_UP	143	-0.482956	-2.32846	0
1996	RUBENSTEIN_SKELETAL_MUSCLE_PERICYTES	56	-0.55262	-2.33144	0
1997	GSE36826_WT_VS_IL1R_KO_SKIN_STAPH_AUREUS_INF_DN	63	-0.518427	-2.33171	0
1998	HP_SPARSE_EYELASHES	16	-0.744173	-2.33326	0
[truncated: 1,391 more rows]

## Sheet: GSEA_enriched gene sets
Supplementary Table 2: List of significantly enriched gene sets from GSEA analysis in GSC vs. DGC RNA-Seq Data (GSE54792) (Sengupta et al, 2022)
S.No.	NAME	SIZE	ES*	NES#	NOM p-value^
1	DESCARTES_FETAL_MUSCLE_SCHWANN_CELLS	38	0.746258	3.37766	0
2	DESCARTES_FETAL_LUNG_VISCERAL_NEURONS	55	0.74449	3.36666	0
3	DESCARTES_FETAL_ADRENAL_SCHWANN_CELLS	48	0.822633	3.34278	0
4	ZHONG_PFC_MAJOR_TYPES_OPC	52	0.747266	3.33418	0
5	MANNO_MIDBRAIN_NEUROTYPES_HOPC	145	0.639653	3.32159	0
6	VERHAAK_GLIOBLASTOMA_PRONEURAL	69	0.704193	3.30271	0
7	MIKKELSEN_MEF_HCP_WITH_H3K27ME3	99	0.641502	3.18608	0
8	MANNO_MIDBRAIN_NEUROTYPES_HRGL2B	158	0.569572	3.00771	0
9	MANNO_MIDBRAIN_NEUROTYPES_HRGL2C	115	0.586855	2.97842	0
10	FAN_EMBRYONIC_CTX_BIG_GROUPS_GLIAL	67	0.618097	2.93931	0
11	DESCARTES_FETAL_INTESTINE_ENS_GLIA	23	0.837906	2.86851	0
12	ZHONG_PFC_MAJOR_TYPES_ASTROCYTES	143	0.530875	2.79773	0
13	FAN_EMBRYONIC_CTX_OPC	22	0.805965	2.75782	0
14	DESCARTES_FETAL_PANCREAS_ENS_GLIA	26	0.762537	2.72771	0
15	MANNO_MIDBRAIN_NEUROTYPES_HRGL2A	208	0.495267	2.6863	0
16	DESCARTES_MAIN_FETAL_OLIGODENDROCYTES	20	0.85742	2.67092	0
17	GOBP_NEGATIVE_REGULATION_OF_NEURON_DIFFERENTIATION	15	0.76111	2.582	0
18	DESCARTES_FETAL_HEART_SATB2_LRRC7_POSITIVE_CELLS	30	0.653394	2.55039	0
19	DESCARTES_FETAL_CEREBRUM_OLIGODENDROCYTES	18	0.788729	2.53883	0
20	DESCARTES_FETAL_CEREBELLUM_OLIGODENDROCYTES	27	0.746881	2.5358	0
21	DURANTE_ADULT_OLFACTORY_NEUROEPITHELIUM_OLFACTORY_ENSHEATHING_GLIA	53	0.57177	2.49709	0
22	DESCARTES_FETAL_HEART_SCHWANN_CELLS	17	0.801555	2.39486	0
23	GTTRYCATRR_UNKNOWN	41	0.547026	2.37283	0
24	SHEN_SMARCA2_TARGETS_DN	56	0.497384	2.37743	0
25	DESCARTES_FETAL_STOMACH_ENS_GLIA	17	0.761251	2.3819	0
26	GOBP_OLIGODENDROCYTE_DIFFERENTIATION	27	0.618491	2.35915	0
27	REN_ALVEOLAR_RHABDOMYOSARCOMA_UP	25	0.739366	2.36072	0
28	NAKAYAMA_SOFT_TISSUE_TUMORS_PCA1_DN	31	0.606866	2.31966	0
29	GOBP_GLIAL_CELL_DEVELOPMENT	29	0.577019	2.31226	0
30	GOMF_LIGAND_GATED_ION_CHANNEL_ACTIVITY	23	0.627086	2.31705	0
31	GOBP_REGULATION_OF_CARDIAC_CONDUCTION	20	0.635916	2.30198	0
32	MANNO_MIDBRAIN_NEUROTYPES_HNBML1	81	0.495819	2.28082	0
33	MANNO_MIDBRAIN_NEUROTYPES_HNBM	89	0.461702	2.29128	0
34	GOMF_LIGAND_GATED_CATION_CHANNEL_ACTIVITY	19	0.642573	2.28157	0
35	GOBP_ENSHEATHMENT_OF_NEURONS	31	0.593128	2.29178	0
36	GOMF_POTASSIUM_ION_TRANSMEMBRANE_TRANSPORTER_ACTIVITY	26	0.632802	2.28309	0
37	DESCARTES_FETAL_KIDNEY_METANEPHRIC_CELLS	18	0.683507	2.29281	0
38	MODULE_137	174	0.410009	2.28328	0
39	GOCC_CELL_BODY	138	0.445158	2.26167	0
40	REACTOME_NEURONAL_SYSTEM	98	0.439257	2.23895	0
41	REACTOME_CARDIAC_CONDUCTION	34	0.564209	2.23938	0
42	MANNO_MIDBRAIN_NEUROTYPES_HDA2	118	0.41059	2.2318	0
43	DESCARTES_MAIN_FETAL_SCHWANN_CELLS	15	0.76146	2.23192	0
44	MIKKELSEN_MCV6_HCP_WITH_H3K27ME3	86	0.475345	2.222	0
45	GOBP_REGULATION_OF_POSTSYNAPTIC_MEMBRANE_POTENTIAL	29	0.585447	2.22704	0
46	GCM_MAPK10	34	0.587169	2.2156	0
47	LEIN_OLIGODENDROCYTE_MARKERS	27	0.593928	2.22294	0
48	WP_NEURAL_CREST_DIFFERENTIATION	19	0.670108	2.21074	0
49	MODULE_66	176	0.411405	2.21618	0
50	NRSF_01	23	0.614931	2.21621	0
51	ZHONG_PFC_C9_ORG_OTHER	44	0.525297	2.1881	0
52	MODULE_100	175	0.4128	2.16487	0
53	BEIER_GLIOMA_STEM_CELL_UP	15	0.66882	2.15506	0
54	GOMF_POTASSIUM_CHANNEL_ACTIVITY	19	0.636122	2.15445	0
55	RICKMAN_HEAD_AND_NECK_CANCER_A	20	0.605532	2.1451	0
56	GOCC_DENDRITIC_TREE	141	0.395491	2.14637	0
57	GOBP_METAL_ION_EXPORT	16	0.631437	2.14752	0
58	TRAVAGLINI_LUNG_SEROUS_CELL	18	0.652403	2.15266	0
59	CHR20Q13	49	0.493023	2.15547	0
60	MARTORIATI_MDM4_TARGETS_NEUROEPITHELIUM_DN	43	0.521071	2.15646	0
61	GNF2_SMC4L1	40	0.463812	2.12706	0
62	GOCC_NEURON_PROJECTION_TERMINUS	26	0.536588	2.1333	0
63	CAIRO_HEPATOBLASTOMA_CLASSES_UP	250	0.367712	2.12064	0
64	GCM_AQP4	19	0.60156	2.11283	0
65	HU_FETAL_RETINA_MULLER	19	0.613558	2.10772	0
66	GOBP_LOCOMOTORY_BEHAVIOR	34	0.48673	2.10958	0
67	ZHONG_PFC_C3_MICROGLIA	132	0.404881	2.10367	0
68	GOCC_POSTSYNAPSE	145	0.407067	2.09277	0
69	REACTOME_ION_TRANSPORT_BY_P_TYPE_ATPASES	19	0.610843	2.08207	0
70	MANALO_HYPOXIA_DN	121	0.392235	2.08636	0
71	GOBP_ADULT_BEHAVIOR	33	0.4885	2.08244	0
72	GOCC_POTASSIUM_CHANNEL_COMPLEX	18	0.60048	2.08247	0
73	MODULE_11	180	0.391911	2.07809	0
74	MORF_FBL	62	0.446403	2.07725	0
75	GOBP_GLIOGENESIS	83	0.434976	2.07602	0
76	MODULE_213	15	0.681748	2.07348	0
77	BENPORATH_ES_WITH_H3K27ME3	254	0.37093	2.07179	0
78	MANNO_MIDBRAIN_NEUROTYPES_HNBML5	108	0.393527	2.06162	0
79	GOMF_GATED_CHANNEL_ACTIVITY	64	0.490563	2.06925	0
80	GOCC_DISTAL_AXON	77	0.443795	2.06308	0
81	GOMF_VOLTAGE_GATED_POTASSIUM_CHANNEL_ACTIVITY	15	0.627975	2.06342	0
82	MIR6840_3P	47	0.470587	2.05953	0
83	WONG_EMBRYONIC_STEM_CELL_CORE	150	0.35912	2.06367	0
84	ABE_INNER_EAR	18	0.649114	2.05231	0
85	ASTON_MAJOR_DEPRESSIVE_DISORDER_DN	56	0.457151	2.04864	0
86	GOBP_POTASSIUM_ION_TRANSPORT	41	0.510829	2.03959	0
87	GOMF_PASSIVE_TRANSMEMBRANE_TRANSPORTER_ACTIVITY	82	0.412187	2.03965	0
88	GOBP_DIENCEPHALON_DEVELOPMENT	17	0.61313	2.03997	0
89	GOCC_SOMATODENDRITIC_COMPARTMENT	198	0.39106	2.03827	0
90	HP_POSTURAL_INSTABILITY	18	0.609437	2.04019	0
91	DESCARTES_FETAL_INTESTINE_ENS_NEURONS	34	0.518728	2.02207	0
92	MANNO_MIDBRAIN_NEUROTYPES_HRN	85	0.414569	2.02232	0
93	RODWELL_AGING_KIDNEY_DN	33	0.514571	2.01816	0
94	GOBP_SODIUM_ION_TRANSPORT	60	0.448779	2.01712	0
95	GOCC_NEURON_SPINE	37	0.520227	2.01836	0
96	GOBP_GLIAL_CELL_DIFFERENTIATION	62	0.46939	2.01242	0
97	DESCARTES_FETAL_LIVER_HEPATOBLASTS	63	0.425015	2.01286	0
98	MANNO_MIDBRAIN_NEUROTYPES_HNPROG	73	0.448558	2.01297	0
99	GOMF_METAL_ION_TRANSMEMBRANE_TRANSPORTER_ACTIVITY	84	0.398786	2.00175	0
100	E2F3_UP.V1_UP	60	0.465543	2.00197	0
101	REACTOME_ION_HOMEOSTASIS	17	0.625801	2.00218	0
102	HALLMARK_MYC_TARGETS_V1	86	0.413899	1.99581	0
103	SHEPARD_CRASH_AND_BURN_MUTANT_DN	50	0.476009	1.99715	0
104	REACTOME_ION_CHANNEL_TRANSPORT	46	0.463008	1.9947	0
105	GOBP_REGULATION_OF_SODIUM_ION_TRANSPORT	32	0.492207	1.99759	0
106	NIKOLSKY_BREAST_CANCER_20Q12_Q13_AMPLICON	35	0.493411	1.99263	0
107	GOMF_SODIUM_ION_TRANSMEMBRANE_TRANSPORTER_ACTIVITY	33	0.500712	1.99067	0
108	GNF2_FBL	51	0.443732	1.98765	0
109	GSE40493_BCL6_KO_VS_WT_TREG_DN	21	0.571749	1.98049	0
110	GNF2_RRM1	44	0.458409	1.97944	0
111	MANNO_MIDBRAIN_NEUROTYPES_HGABA	281	0.3389	1.97284	0
112	GOBP_EXPORT_ACROSS_PLASMA_MEMBRANE	19	0.565974	1.97388	0
113	MORF_BUB3	104	0.40637	1.97136	0
114	HALLMARK_E2F_TARGETS	89	0.424173	1.97154	0
115	REACTOME_TRANSMISSION_ACROSS_CHEMICAL_SYNAPSES	67	0.44403	1.96823	0
116	GOCC_POSTSYNAPTIC_MEMBRANE	56	0.447538	1.96836	0
117	GOBP_REGULATION_OF_NEUROTRANSMITTER_LEVELS	45	0.464678	1.96016	0
118	GOMF_CATION_CHANNEL_ACTIVITY	56	0.453145	1.95593	0
119	GSE45365_NK_CELL_VS_CD11B_DC_UP	37	0.492079	1.94693	0
120	HP_FOCAL_MOTOR_SEIZURE	17	0.578871	1.94816	0
121	GOBP_RIBONUCLEOPROTEIN_COMPLEX_BIOGENESIS	135	0.383043	1.9482	0
122	REACTOME_POTASSIUM_CHANNELS	17	0.597769	1.94106	0
123	GOBP_SODIUM_ION_TRANSMEMBRANE_TRANSPORT	44	0.459678	1.93557	0
124	GOBP_DENDRITE_DEVELOPMENT	68	0.411569	1.93565	0
125	REACTOME_RRNA_PROCESSING	64	0.416739	1.93915	0
126	WATANABE_COLON_CANCER_MSI_VS_MSS_DN	16	0.666457	1.93842	0
127	MIR6848_5P	23	0.533321	1.9362	0
128	GOBP_CENTRAL_NERVOUS_SYSTEM_DEVELOPMENT	270	0.340643	1.93658	0
129	RODWELL_AGING_KIDNEY_NO_BLOOD_DN	37	0.502536	1.93989	0
130	DCA_UP.V1_UP	32	0.497164	1.93702	0
131	MIR296_5P	15	0.602993	1.93196	0
132	GNF2_PCNA	30	0.460238	1.93242	0
133	GNF2_APEX1	43	0.424611	1.92644	0
134	GSE8515_CTRL_VS_IL6_4H_STIM_MAC_DN	43	0.419424	1.92663	0
135	SOTIRIOU_BREAST_CANCER_GRADE_1_VS_3_UP	69	0.418769	1.92465	0
136	DAWSON_METHYLATED_IN_LYMPHOMA_TCL1	15	0.579464	1.92045	0
137	GOBP_CYCLIC_NUCLEOTIDE_MEDIATED_SIGNALING	17	0.573864	1.92072	0
138	HP_ANOPHTHALMIA	17	0.581781	1.92079	0
139	MANNO_MIDBRAIN_NEUROTYPES_HOMTN	107	0.384677	1.91838	0
140	HP_POOR_MOTOR_COORDINATION	17	0.604848	1.91523	0
141	HU_FETAL_RETINA_RGC	142	0.360604	1.91167	0
142	GNF2_PA2G4	39	0.457491	1.91018	0
143	GOBP_NEUROTRANSMITTER_TRANSPORT	42	0.488025	1.91208	0
144	GSE9960_HEALTHY_VS_GRAM_NEG_AND_POS_SEPSIS_PBMC_UP	34	0.465386	1.90799	0
145	GOBP_NEGATIVE_REGULATION_OF_SYNAPTIC_TRANSMISSION	15	0.577104	1.90324	0
146	MORF_AATF	74	0.425962	1.90388	0
147	GOMF_VOLTAGE_GATED_CATION_CHANNEL_ACTIVITY	22	0.54981	1.90557	0
148	MORF_EIF3S2	87	0.404229	1.90333	0
149	GSE37532_TREG_VS_TCONV_CD4_TCELL_FROM_LN_UP	67	0.42443	1.90436	0
150	REACTOME_NGF_STIMULATED_TRANSCRIPTION	16	0.578095	1.8985	0
151	GOBP_CELL_FATE_COMMITMENT	52	0.442954	1.89886	0
152	GSE13547_WT_VS_ZFX_KO_BCELL_ANTI_IGM_STIM_12H_UP	35	0.453075	1.89947	0
153	MODULE_274	22	0.536941	1.89889	0
154	PRC1_BMI_UP.V1_UP	33	0.459397	1.90026	0
155	SMID_BREAST_CANCER_RELAPSE_IN_BONE_UP	22	0.504917	1.89026	0
156	GSE21670_UNTREATED_VS_TGFB_TREATED_CD4_TCELL_UP	50	0.455368	1.89043	0
157	GOBP_MULTICELLULAR_ORGANISMAL_SIGNALING	54	0.433568	1.89063	0
158	FOXM1_01	67	0.375896	1.88294	0
159	MANNO_MIDBRAIN_NEUROTYPES_HRGL1	102	0.38927	1.88161	0
160	MODULE_183	29	0.455519	1.8805	0
161	GOBP_PHOTORECEPTOR_CELL_DIFFERENTIATION	17	0.554453	1.87952	0
162	GOCC_SYNAPSE	302	0.309421	1.88319	0
163	MANNO_MIDBRAIN_NEUROTYPES_HDA1	151	0.359416	1.88381	0
164	WP_MRNA_PROCESSING	56	0.407743	1.86949	0
165	ROSTY_CERVICAL_CANCER_PROLIFERATION_CLUSTER	66	0.408928	1.8707	0
166	REACTOME_CHOLESTEROL_BIOSYNTHESIS	15	0.609863	1.86677	0
167	GOMF_CATION_TRANSMEMBRANE_TRANSPORTER_ACTIVITY	120	0.371614	1.86796	0
168	DURANTE_ADULT_OLFACTORY_NEUROEPITHELIUM_IMMATURE_NEURONS	41	0.488933	1.86683	0
169	HUANG_DASATINIB_RESISTANCE_DN	25	0.515187	1.86291	0
170	HP_ABNORMAL_MORPHOLOGY_OF_THE_LIMBIC_SYSTEM	16	0.563304	1.8587	0
171	GOBP_REGULATION_OF_CHOLESTEROL_METABOLIC_PROCESS	22	0.555396	1.86116	0
172	REACTOME_NEUROTRANSMITTER_RECEPTORS_AND_POSTSYNAPTIC_ SIGNAL_TRANSMISSION	47	0.432123	1.85871	0
173	GOBP_SPINAL_CORD_DEVELOPMENT	23	0.522819	1.85925	0
174	GAO_LARGE_INTESTINE_ADULT_CA_ENTEROENDOCRINE_CELLS	84	0.376858	1.85451	0
175	GOBP_REGULATION_OF_MEMBRANE_POTENTIAL	110	0.357092	1.85384	0
176	HP_NON_MOTOR_SEIZURE	46	0.424941	1.84708	0
177	MIER1_TARGET_GENES	88	0.389157	1.8458	0
178	GAO_LARGE_INTESTINE_ADULT_CH_MKI67HIGH_CELLS	35	0.436951	1.8447	0
179	HP_STATUS_EPILEPTICUS	46	0.411883	1.83975	0
180	DESCARTES_FETAL_STOMACH_ENS_NEURONS	21	0.503041	1.83978	0
181	HMGIY_Q6	60	0.390893	1.83991	0
182	MIR6737_3P	48	0.414178	1.84213	0
183	GNF2_CCNA2	32	0.459531	1.84032	0
184	KRAS.LUNG_UP.V1_DN	23	0.487502	1.84055	0
185	GOBP_IMPORT_INTO_CELL	65	0.389518	1.84079	0
186	WHITEFORD_PEDIATRIC_CANCER_MARKERS	58	0.41297	1.83466	0
187	GOBP_NEURON_DIFFERENTIATION	370	0.30543	1.8289	0
188	CROONQUIST_NRAS_SIGNALING_DN	37	0.468192	1.82957	0
189	GOCC_INTRINSIC_COMPONENT_OF_POSTSYNAPTIC_MEMBRANE	24	0.534409	1.82584	0
190	MEL18_DN.V1_DN	39	0.419571	1.82516	0
191	GSE22886_NEUTROPHIL_VS_MONOCYTE_UP	40	0.444114	1.82633	0
192	GOBP_VESICLE_MEDIATED_TRANSPORT_IN_SYNAPSE	43	0.427745	1.82353	0
193	REACTOME_METABOLISM_OF_RNA	209	0.32701	1.8238	0
194	GSE41176_UNSTIM_VS_ANTI_IGM_STIM_TAK1_KO_BCELL_6H_DN	45	0.455706	1.82212	0
195	FISCHER_DREAM_TARGETS	322	0.307654	1.82411	0
196	GOBP_REGULATION_OF_SODIUM_ION_TRANSMEMBRANE_TRANSPORT	21	0.518693	1.8204	0
197	HP_BILATERAL_TONIC_CLONIC_SEIZURE	71	0.395617	1.81867	0
198	BENPORATH_SUZ12_TARGETS	215	0.322688	1.81608	0
199	PUJANA_BREAST_CANCER_WITH_BRCA1_MUTATED_UP	31	0.463279	1.8137	0
200	COLIN_PILOCYTIC_ASTROCYTOMA_VS_GLIOBLASTOMA_UP	18	0.54693	1.81285	0
201	MIR1205	49	0.428191	1.81043	0
202	GOBP_LEARNING	30	0.47317	1.80335	0
203	GSE40666_STAT1_KO_VS_STAT4_KO_CD8_TCELL_WITH_IFNA_STIM_90MIN_DN	35	0.484475	1.80365	0
204	GSE41176_WT_VS_TAK1_KO_ANTI_IGM_STIM_BCELL_3H_UP	36	0.44531	1.80221	0
205	LEE_LIVER_CANCER_SURVIVAL_UP	38	0.423602	1.80384	0
206	MIR6892_3P	32	0.473637	1.80414	0
207	GNF2_RFC4	34	0.443002	1.79655	0
208	HP_KINETIC_TREMOR	20	0.483722	1.80099	0
209	CROONQUIST_IL6_DEPRIVATION_DN	50	0.408588	1.79906	0
210	MORF_PCNA	37	0.445132	1.79959	0
211	GNF2_MCM5	34	0.445139	1.7968	0
212	MIR2682_5P	30	0.474256	1.79977	0
213	GOBP_L_AMINO_ACID_TRANSPORT	22	0.5064	1.79704	0
214	GNF2_RAN	43	0.459727	1.79707	0
215	LEF1_Q6	73	0.383212	1.79444	0
216	GSE22886_NEUTROPHIL_VS_DC_UP	44	0.432023	1.79184	0
217	VERHAAK_GLIOBLASTOMA_CLASSICAL	43	0.416449	1.79054	0
218	GOBP_NEUROGENESIS	441	0.291198	1.78933	0
219	GOBP_FOREBRAIN_DEVELOPMENT	104	0.371759	1.78778	0
220	GOCC_TRANSPORTER_COMPLEX	79	0.369851	1.78542	0
221	GOBP_SYNAPTIC_SIGNALING	167	0.332542	1.7826	0
222	FAN_EMBRYONIC_CTX_OLIG	240	0.311434	1.78287	0
223	GOBP_CENTRAL_NERVOUS_SYSTEM_NEURON_DEVELOPMENT	26	0.483282	1.78079	0
224	DAVICIONI_MOLECULAR_ARMS_VS_ERMS_UP	102	0.346595	1.77784	0
225	PRC2_SUZ12_UP.V1_DN	30	0.453136	1.77834	0
226	GOCC_NEURON_TO_NEURON_SYNAPSE	91	0.371142	1.78156	0
227	MIR7157_3P	48	0.414178	1.78288	0
228	CTIP_DN.V1_DN	28	0.456511	1.77449	0
229	HALLMARK_MYC_TARGETS_V2	35	0.469498	1.77908	0
230	BROWNE_HCMV_INFECTION_24HR_UP	38	0.429177	1.77464	0
231	GOCC_U2_TYPE_SPLICEOSOMAL_COMPLEX	33	0.413568	1.77502	0
232	MORF_WNT1	17	0.530277	1.77326	0
233	HOWARD_NK_CELL_INACT_MONOV_INFLUENZA_A_INDONESIA_05_2005_H5N1_ AGE_18_49YO_3DY_UP	30	0.452381	1.77949	0
234	HP_EXCESSIVE_SALIVATION	25	0.477761	1.77912	0
235	MIR10394_5P	48	0.433216	1.77333	0
236	GOMF_MICROTUBULE_MOTOR_ACTIVITY	17	0.533696	1.77263	0
237	MORF_RRM1	40	0.445201	1.77571	0
238	PUJANA_CHEK2_PCC_NETWORK	273	0.326202	1.76654	0
239	MORF_ANP32B	66	0.395209	1.76086	0
240	GOBP_RIBOSOME_BIOGENESIS	94	0.37706	1.75977	0
241	REACTOME_TRANSLATION	66	0.385811	1.75808	0
242	MODULE_124	39	0.453029	1.75826	0
243	CHARAFE_BREAST_CANCER_LUMINAL_VS_MESENCHYMAL_UP	99	0.345907	1.75431	0
244	GOCC_NEURON_PROJECTION	312	0.304102	1.75292	0
245	GOBP_LIMBIC_SYSTEM_DEVELOPMENT	26	0.455146	1.7532	0
246	GOBP_HINDBRAIN_DEVELOPMENT	40	0.411685	1.75176	0
247	MIR7847_3P	23	0.479899	1.74906	0
248	REACTOME_MRNA_SPLICING	76	0.367058	1.74925	0
249	GOBP_CHEMICAL_SYNAPTIC_TRANSMISSION_POSTSYNAPTIC	24	0.510924	1.74675	0
250	GOBP_BEHAVIOR	122	0.36103	1.74485	0
251	REACTOME_PROCESSING_OF_CAPPED_INTRON_CONTAINING_PRE_MRNA	92	0.372994	1.74251	0
252	MIR6889_3P	26	0.456576	1.7428	0
253	GNF2_NPM1	34	0.445887	1.74089	0
254	MANNO_MIDBRAIN_NEUROTYPES_HNBGABA	156	0.331268	1.73579	0
255	GOBP_NEURON_DEVELOPMENT	310	0.301577	1.7347	0
256	MYCMAX_01	81	0.366247	1.73492	0
257	VILLANUEVA_LIVER_CANCER_KRT19_UP	56	0.373481	1.73355	0
258	SOX10_TARGET_GENES	72	0.369116	1.73105	0
259	GNF2_MLH1	24	0.461839	1.72762	0
260	HP_AUTISM	40	0.425741	1.72809	0
261	GOBP_REGULATION_OF_SODIUM_ION_TRANSMEMBRANE_TRANSPORTER_ACTIVITY	17	0.514946	1.7269	0
262	DESCARTES_MAIN_FETAL_SATB2_LRRC7_POSITIVE_CELLS	20	0.488557	1.72502	0
263	GSE24210_IL35_TREATED_VS_RESTING_TREG_DN	29	0.456184	1.72444	0
264	MORF_CDK2	28	0.444307	1.72511	0
265	MIR4777_3P	17	0.547719	1.7238	0
266	GOCC_RIBOSOMAL_SUBUNIT	52	0.379586	1.72013	0
267	GSE41176_WT_VS_TAK1_KO_UNSTIM_BCELL_DN	42	0.43409	1.71597	0
268	GSE13229_IMM_VS_INTMATURE_NKCELL_UP	36	0.445454	1.71666	0
269	HP_TRUNCAL_ATAXIA	17	0.556578	1.71077	0
270	GOBP_AXON_DEVELOPMENT	147	0.315522	1.71106	0
271	KRAS.50_UP.V1_UP	17	0.517735	1.71116	0
272	GSE18893_TCONV_VS_TREG_24H_TNF_STIM_UP	79	0.364321	1.71159	0
273	GOCC_PRESYNAPSE	103	0.362772	1.7112	0
274	RICKMAN_TUMOR_DIFFERENTIATED_WELL_VS_POORLY_UP	86	0.339523	1.71173	0
275	HOSHIDA_LIVER_CANCER_LATE_RECURRENCE_DN	15	0.541963	1.71205	0
276	MORF_ERH	39	0.42439	1.70812	0
277	BENPORATH_PRC2_TARGETS	131	0.320107	1.70818	0
278	SONG_TARGETS_OF_IE86_CMV_PROTEIN	21	0.484992	1.70718	0
279	GOBP_CATION_TRANSMEMBRANE_TRANSPORT	196	0.305815	1.70385	0
280	GSE9988_LPS_VS_LOW_LPS_MONOCYTE_UP	35	0.415166	1.70437	0
281	GNF2_RFC3	24	0.44209	1.70386	0
282	HP_EPILEPTIC_ENCEPHALOPATHY	22	0.517756	1.70269	0
283	GNF2_MCM4	28	0.458164	1.70214	0
284	BUSSLINGER_GASTRIC_PREZYMOGENIC_CELLS	17	0.540305	1.69932	0
285	HU_FETAL_RETINA_PHOTORECEPTOR	22	0.543215	1.69784	0
286	CHR21Q22	33	0.402785	1.69878	0
287	MORF_CSNK2B	89	0.35277	1.69547	0
288	YOSHIMURA_MAPK8_TARGETS_UP	266	0.293969	1.69493	0
289	GOBP_NEURAL_NUCLEUS_DEVELOPMENT	17	0.523303	1.69548	0
290	GOBP_NCRNA_PROCESSING	113	0.340817	1.69635	0
291	GNF2_FEN1	27	0.456939	1.69564	0
292	MIR6754_3P	27	0.4229	1.68896	0
293	GOCC_CATALYTIC_STEP_2_SPLICEOSOME	37	0.423194	1.68909	0
294	MORF_DNMT1	47	0.397181	1.68762	0
295	ZHONG_PFC_C8_UNKNOWN_NEUROD2_POS_INTERNEURON	30	0.448374	1.68979	0
296	WP_CHOLESTEROL_METABOLISM_INCLUDES_BOTH_BLOCH_AND_ KANDUTSCHRUSSELL_PATHWAYS	22	0.53328	1.68796	0
297	MORF_UNG	27	0.462124	1.68933	0
298	GOBP_RNA_SPLICING_VIA_TRANSESTERIFICATION_REACTIONS	128	0.311684	1.6899	0
299	ZNF202_TARGET_GENES	25	0.44493	1.6865	0
300	MIR4306	113	0.324391	1.68513	0
301	GOCC_RIBOSOME	58	0.389851	1.68553	0
302	DURANTE_ADULT_OLFACTORY_NEUROEPITHELIUM_MATURE_NEURONS	46	0.384018	1.68437	0
303	BENPORATH_EED_TARGETS	235	0.301042	1.68383	0
304	FAN_EMBRYONIC_CTX_MICROGLIA_1	57	0.37828	1.68096	0
305	MIKKELSEN_MEF_ICP_WITH_H3K27ME3	36	0.425656	1.6811	0
306	MODULE_426	25	0.473179	1.67882	0
307	ZF5_B	65	0.366627	1.67715	0
308	ACTGTAG_MIR139	31	0.45769	1.67609	0
309	MODULE_117	111	0.334175	1.67454	0
310	GOCC_ATPASE_COMPLEX	30	0.404868	1.67072	0
311	BLANCO_MELO_HUMAN_PARAINFLUENZA_VIRUS_3_INFECTION_A594_CELLS_DN	26	0.456802	1.67212	0
312	ISHIDA_E2F_TARGETS	26	0.455	1.66977	0
313	GOCC_NEURON_PROJECTION_CYTOPLASM	30	0.436432	1.66896	0
314	ZHONG_PFC_C4_PTGDS_POS_OPC	40	0.420141	1.66802	0
315	HP_DILATION_OF_LATERAL_VENTRICLES	24	0.433004	1.66977	0
316	SMTTTTGT_UNKNOWN	106	0.305498	1.66823	0
317	GOCC_SYNAPTIC_MEMBRANE	85	0.341544	1.67103	0
318	OLF1_01	66	0.355985	1.66735	0
319	GOCC_GABA_ERGIC_SYNAPSE	21	0.454687	1.66169	0
320	GOCC_AXON	161	0.321633	1.65526	0
321	GOBP_REGULATION_OF_NEURON_PROJECTION_DEVELOPMENT	136	0.313081	1.65384	0
322	REACTOME_TRANSPORT_OF_SMALL_MOLECULES	166	0.308057	1.65249	0
323	MIR4516	71	0.352413	1.65292	0
324	MORF_DAP3	54	0.378427	1.6514	0
325	DESCARTES_FETAL_SPLEEN_AFP_ALB_POSITIVE_CELLS	40	0.393822	1.65101	0
326	GSE22601_IMMATURE_CD4_SINGLE_POSITIVE_VS_DOUBLE_POSITIVE_THYMOCYTE_UP	35	0.407307	1.6459	0
327	GOBERT_OLIGODENDROCYTE_DIFFERENTIATION_DN	347	0.264985	1.64134	0
328	BENPORATH_PROLIFERATION	57	0.354048	1.6403	0
329	GNF2_CENPF	26	0.462637	1.63884	0
330	GNF2_DAP3	37	0.408688	1.6414	0
331	GOBP_L_ALPHA_AMINO_ACID_TRANSMEMBRANE_TRANSPORT	23	0.455397	1.63842	0
332	GOBP_CELL_PART_MORPHOGENESIS	194	0.300242	1.63885	0
333	MORF_PPP1CC	57	0.356697	1.64144	0
334	GOBP_POSTSYNAPSE_ORGANIZATION	42	0.400677	1.64212	0
335	GOBP_REGULATION_OF_NEUROTRANSMITTER_TRANSPORT	20	0.480641	1.63691	0
336	GOBP_CATION_TRANSPORT	253	0.296595	1.63708	0
337	MIR6846_5P	19	0.50777	1.62935	0
338	GNF2_RBBP6	19	0.458898	1.62816	0
339	MIR5690	34	0.401291	1.62848	0
340	GOBP_NCRNA_METABOLIC_PROCESS	138	0.316289	1.62675	0
341	GOMF_VOLTAGE_GATED_ION_CHANNEL_ACTIVITY	35	0.426684	1.62465	0
342	MORF_RAN	81	0.343473	1.62387	0
343	HP_MYOCLONUS	79	0.355129	1.62342	0
344	MORF_DEK	83	0.34513	1.62233	0
345	GOCC_GLUTAMATERGIC_SYNAPSE	74	0.355478	1.62074	0
346	GOCC_INTRINSIC_COMPONENT_OF_SYNAPTIC_MEMBRANE	29	0.457586	1.62001	0
347	REACTOME_REGULATION_OF_EXPRESSION_OF_SLITS_AND_ROBOS	40	0.369387	1.61924	0
348	GOBP_INORGANIC_ION_TRANSMEMBRANE_TRANSPORT	180	0.295673	1.61522	0
349	ANDERSON_BLOOD_CN54GP140_ADJUVANTED_WITH_GLA_AF_AGE_18_45YO_1DY_UP	19	0.521852	1.61427	0
350	REACTOME_STIMULI_SENSING_CHANNELS	23	0.435156	1.61333	0
351	GNF2_CDC2	25	0.461465	1.61341	0
352	GSE11924_TH1_VS_TH17_CD4_TCELL_UP	44	0.377401	1.61059	0
353	GOCC_RIBONUCLEOPROTEIN_COMPLEX	202	0.293149	1.61013	0
354	MORF_ACP1	68	0.360746	1.61068	0
355	FAN_EMBRYONIC_CTX_BIG_GROUPS_EXCITATORY_NEURON	15	0.490374	1.60849	0
356	MORF_RAD23A	119	0.322057	1.60869	0
357	GOBP_CENTRAL_NERVOUS_SYSTEM_NEURON_DIFFERENTIATION	45	0.375115	1.60542	0
358	HALLMARK_G2M_CHECKPOINT	83	0.354808	1.60409	0
359	GSE43863_NAIVE_VS_TH1_EFF_CD4_TCELL_D6_LCMV_DN	30	0.40329	1.60352	0
360	GOBP_CELL_PROJECTION_ORGANIZATION	415	0.266585	1.60237	0
361	MANNO_MIDBRAIN_NEUROTYPES_HRGL3	170	0.305546	1.6024	0
362	ARNT_02	72	0.356295	1.59942	0
363	HP_VERTEBRAL_SEGMENTATION_DEFECT	31	0.421051	1.5942	0
364	MIR7152_3P	28	0.452673	1.5949	0
365	PUJANA_XPRSS_INT_NETWORK	76	0.338685	1.59302	0
366	GOBP_SYNAPSE_ORGANIZATION	115	0.31412	1.59047	0
367	GOCC_PLASMA_MEMBRANE_BOUNDED_CELL_PROJECTION_CYTOPLASM	49	0.357604	1.58944	0
368	GSE2706_2H_VS_8H_LPS_STIM_DC_UP	50	0.348239	1.5891	0
369	MORF_SMC1L1	27	0.44401	1.58883	0
370	BMI1_DN.V1_DN	35	0.414208	1.58798	0
371	GOCC_TRANSCRIPTION_REPRESSOR_COMPLEX	16	0.490616	1.58764	0
372	GOBP_CARDIAC_CONDUCTION	42	0.389269	1.5881	0
373	GSE24634_TREG_VS_TCONV_POST_DAY7_IL4_CONVERSION_UP	67	0.34024	1.58588	0
374	MANNO_MIDBRAIN_NEUROTYPES_HDA	126	0.301968	1.58343	0
375	GOBP_REGULATION_OF_TRANS_SYNAPTIC_SIGNALING	114	0.316571	1.58236	0
376	LEE_NEURAL_CREST_STEM_CELL_DN	39	0.384567	1.58095	0
377	GOBP_CELL_MORPHOGENESIS_INVOLVED_IN_NEURON_DIFFERENTIATION	164	0.302241	1.58274	0
378	MODULE_181	56	0.348528	1.57775	0
379	GOMF_TRANSPORTER_ACTIVITY	252	0.268545	1.57338	0
380	RYTGCNWTGGNR_UNKNOWN	27	0.427327	1.57257	0
381	GOBP_HEAD_DEVELOPMENT	209	0.289262	1.57201	0
382	WP_SPINAL_CORD_INJURY	32	0.412753	1.57174	0
383	GSE411_UNSTIM_VS_400MIN_IL6_STIM_MACROPHAGE_DN	57	0.353192	1.57224	0
384	GOMF_ION_TRANSMEMBRANE_TRANSPORTER_ACTIVITY	198	0.283948	1.56796	0
385	EFC_Q6	75	0.334022	1.56717	0
386	TST1_01	61	0.319185	1.56279	0
387	GSE3982_EOSINOPHIL_VS_MAC_UP	48	0.360767	1.56313	0
388	GOBP_POSITIVE_REGULATION_OF_BIOMINERALIZATION	15	0.50349	1.56292	0
389	HP_SPORADIC	18	0.494189	1.55955	0
390	KAUFFMANN_MELANOMA_RELAPSE_UP	28	0.417117	1.55732	0
391	GSE11961_PLASMA_CELL_DAY7_VS_MEMORY_BCELL_DAY40_DN	40	0.388482	1.55737	0
392	GSE25123_IL4_VS_IL4_AND_ROSIGLITAZONE_STIM_PPARG_KO_MACROPHAGE_ DAY10_UP	33	0.381318	1.5555	0
393	SMID_BREAST_CANCER_LUMINAL_B_UP	51	0.373077	1.55451	0
394	REACTOME_TRNA_PROCESSING	33	0.380071	1.55266	0
395	MANNO_MIDBRAIN_NEUROTYPES_HSERT	106	0.313162	1.54934	0
396	MIR6833_3P	99	0.311385	1.54972	0
397	GOBP_TELENCEPHALON_DEVELOPMENT	68	0.322937	1.5481	0
398	MIR661	43	0.349945	1.54762	0
399	GOBP_COGNITION	64	0.334177	1.54331	0
400	GSE15930_STIM_VS_STIM_AND_IFNAB_24H_CD8_T_CELL_UP	43	0.370136	1.53905	0
401	CHR16P13	71	0.327229	1.53771	0
402	WHN_B	82	0.281264	1.53176	0
403	PUJANA_BRCA1_PCC_NETWORK	488	0.244978	1.52967	0
404	GOCC_PRECATALYTIC_SPLICEOSOME	22	0.436356	1.52683	0
405	MYOD_Q6_01	74	0.311227	1.52373	0
406	HP_GENERALIZED_ONSET_SEIZURE	87	0.324005	1.52287	0
407	DOANE_BREAST_CANCER_CLASSES_UP	16	0.495559	1.5225	0
408	MORF_RFC4	50	0.362357	1.52115	0
409	GOBP_PROTEIN_DNA_COMPLEX_SUBUNIT_ORGANIZATION	55	0.318307	1.52143	0
410	HP_ACTION_TREMOR	42	0.370895	1.51728	0
411	GOBP_CELLULAR_COMPONENT_MORPHOGENESIS	220	0.264344	1.51471	0
412	MARTENS_TRETINOIN_RESPONSE_UP	122	0.299229	1.51292	0
413	GOMF_SINGLE_STRANDED_DNA_BINDING	44	0.355	1.50891	0
414	MOREAUX_MULTIPLE_MYELOMA_BY_TACI_UP	91	0.294332	1.50853	0
415	MORF_UBE2I	78	0.31807	1.50372	0
416	MIKKELSEN_MEF_HCP_WITH_H3_UNMETHYLATED	36	0.358906	1.50099	0
417	MUELLER_PLURINET	117	0.281747	1.5007	0
418	GOBP_REGULATION_OF_CATION_TRANSMEMBRANE_TRANSPORT	93	0.290859	1.49941	0
419	MYC_UP.V1_UP	53	0.361036	1.48681	0
420	REACTOME_CELL_CYCLE_CHECKPOINTS	85	0.310874	1.48354	0
421	GOBP_RIBOSOMAL_SMALL_SUBUNIT_BIOGENESIS	17	0.440633	1.48315	0
422	GOBP_RNA_PROCESSING	298	0.259437	1.48428	0
423	MORF_XRCC5	90	0.308832	1.47669	0
424	AREB6_02	62	0.331017	1.45755	0
425	GOBP_DNA_DEPENDENT_DNA_REPLICATION	51	0.33115	1.45025	0
426	BENPORATH_ES_1	142	0.26649	1.44774	0
427	MIR27A_3P_MIR27B_3P	161	0.260898	1.44493	0
428	S8_01	59	0.334654	1.43337	0
429	HP_ABNORMALITY_OF_CENTRAL_NERVOUS_SYSTEM_ELECTROPHYSIOLOGY	116	0.283814	1.43351	0
430	HP_MOTOR_SEIZURE	72	0.308462	1.42919	0
431	MIR6081	26	0.379802	1.43043	0
432	MIR185_3P	33	0.371685	1.42851	0
433	GOBP_TRANSMEMBRANE_TRANSPORT	362	0.234509	1.42979	0
434	MIR4665_5P	49	0.329677	1.42624	0
435	BRUINS_UVC_RESPONSE_VIA_TP53_GROUP_A	225	0.251832	1.41874	0
436	TGACAGNY_MEIS1_01	201	0.253134	1.41424	0
437	GOMF_MICROTUBULE_BINDING	64	0.292328	1.41138	0
438	HP_AUTISTIC_BEHAVIOR	126	0.276582	1.40802	0
439	GOBP_PATTERN_SPECIFICATION_PROCESS	97	0.281728	1.40391	0
440	MODULE_54	116	0.282929	1.39996	0
441	HNF4_DR1_Q3	71	0.284753	1.39972	0
442	GOBP_REGULATION_OF_CELL_PROJECTION_ORGANIZATION	177	0.26295	1.39609	0
443	HP_ENCEPHALOPATHY	76	0.275412	1.38869	0
444	GSE22935_WT_VS_MYD88_KO_MACROPHAGE_DN	62	0.297097	1.38392	0
445	ZHONG_PFC_C1_OPC	86	0.282443	1.37367	0
446	AP2ALPHA_01	65	0.302386	1.36976	0
447	GOBP_MRNA_PROCESSING	164	0.257252	1.36104	0
448	TAGCTTT_MIR9	75	0.288714	1.35452	0
449	MIR7110_3P	98	0.263922	1.34795	0
450	MIR9985	161	0.257555	1.34523	0
451	GOBP_METAL_ION_TRANSPORT	124	0.256428	1.3407	0
452	HP_INVOLUNTARY_MOVEMENTS	247	0.228582	1.33303	0
453	HP_INABILITY_TO_WALK	67	0.298043	1.33261	0
454	CACTGTG_MIR128A_MIR128B	99	0.264163	1.32731	0
455	GOBP_NERVOUS_SYSTEM_PROCESS	198	0.249563	1.32781	0
456	TTTGTAG_MIR520D	82	0.278244	1.31944	0
457	KRIGE_RESPONSE_TO_TOSEDOSTAT_24HR_DN	338	0.215109	1.30011	0
458	CHARAFE_BREAST_CANCER_LUMINAL_VS_BASAL_UP	104	0.253244	1.2978	0
459	HP_GAIT_DISTURBANCE	252	0.217817	1.29904	0
460	HAY_BONE_MARROW_ERYTHROBLAST	385	0.221703	1.28561	0
461	HAY_BONE_MARROW_PRO_B	116	0.256683	1.2733	0
462	GOBP_CELL_MORPHOGENESIS	291	0.224105	1.24648	0
463	SHETH_LIVER_CANCER_VS_TXNIP_LOSS_PAM5	15	0.44677	1.45341	0.0188679
464	GSE41867_LCMV_ARMSTRONG_VS_CLONE13_DAY15_EFFECTOR_CD8_TCELL_DN	25	0.446927	1.62395	0.02
465	SHEPARD_BMYB_TARGETS	26	0.481512	1.73742	0.0204082
466	BLANCO_MELO_COVID19_SARS_COV_2_INFECTION_A594_CELLS_DN	23	0.456515	1.67579	0.0204082
467	GOBP_SYNAPSE_ASSEMBLY	49	0.367989	1.59442	0.0204082
468	MIR6132	37	0.388862	1.58508	0.0204082
469	MIR3150A_3P	31	0.376315	1.41818	0.0204082
470	GNF2_HAT1	19	0.511714	1.83385	0.0208333
471	GOBP_REGULATION_OF_CHOLESTEROL_BIOSYNTHETIC_PROCESS	19	0.535727	1.71492	0.0208333
472	MIR10393_3P	18	0.489248	1.69834	0.0208333
473	GOBP_REGULATION_OF_NEURON_DIFFERENTIATION	44	0.396347	1.65648	0.0208333
474	HP_DROWSINESS	15	0.526159	1.64658	0.0208333
475	GSE5589_WT_VS_IL10_KO_LPS_AND_IL6_STIM_MACROPHAGE_45MIN_DN	38	0.350803	1.51626	0.0208333
476	HP_HORIZONTAL_NYSTAGMUS	22	0.55931	1.8575	0.0212766
477	GNF2_BUB1B	28	0.431202	1.6048	0.0212766
478	MIR6529_3P	19	0.482128	1.60311	0.0212766
479	REACTOME_TRANSPORT_OF_MATURE_TRANSCRIPT_TO_CYTOPLASM	25	0.450823	1.59834	0.0212766
480	GNF2_KPNB1	28	0.433601	1.58741	0.0212766
481	QI_PBMC_ZOSTAVAX_AGE_50_75YO_CORRELATED_WITH_28D_PEAK_T_CELL_ RESPONSE_14DY_NEGATIVE	18	0.482433	1.57612	0.0212766
482	MIR6836_5P	37	0.388862	1.49699	0.0212766
483	DESCARTES_FETAL_PANCREAS_ENS_NEURONS	27	0.466918	1.77545	0.0217391
484	GOCC_PERIKARYON	33	0.445362	1.6695	0.0217391
485	GSE45365_NK_CELL_VS_CD8A_DC_DN	37	0.390567	1.61206	0.0217391
486	GOBP_DENDRITIC_SPINE_MORPHOGENESIS	15	0.475456	1.60574	0.0217391
487	CHR8Q24	43	0.359334	1.50986	0.0217391
488	GSE29949_CD8_NEG_DC_SPLEEN_VS_DC_BRAIN_UP	39	0.363774	1.50703	0.0217391
489	GOCC_SCHAFFER_COLLATERAL_CA1_SYNAPSE	18	0.565283	1.86749	0.0222222
490	GOBP_NEGATIVE_REGULATION_OF_NERVOUS_SYSTEM_DEVELOPMENT	37	0.439033	1.78634	0.0222222
491	GOBP_MULTICELLULAR_ORGANISMAL_RESPONSE_TO_STRESS	16	0.522649	1.74959	0.0222222
492	GOBP_INORGANIC_ION_IMPORT_ACROSS_PLASMA_MEMBRANE	21	0.501306	1.70046	0.0222222
493	MIR412_3P	22	0.48609	1.67101	0.0222222
494	NIKOLSKY_BREAST_CANCER_16P13_AMPLICON	34	0.40229	1.66074	0.0222222
495	FRASOR_RESPONSE_TO_SERM_OR_FULVESTRANT_DN	22	0.474399	1.65463	0.0222222
496	CAHOY_OLIGODENDROCUTIC	34	0.406683	1.65146	0.0222222
497	ATF3_Q6	68	0.334856	1.54205	0.0222222
498	MIR4663	17	0.426305	1.51403	0.0222222
499	GNF2_DEK	27	0.441334	1.47112	0.0222222
500	MIR6499_3P	31	0.374188	1.44065	0.0222222
501	MEISSNER_NPC_HCP_WITH_H3K4ME3_AND_H3K27ME3	34	0.427528	1.79043	0.0227273
502	REACTOME_ACTIVATION_OF_GENE_EXPRESSION_BY_SREBF_SREBP	17	0.514745	1.69249	0.0227273
503	GOCC_CATION_CHANNEL_COMPLEX	44	0.382185	1.66378	0.0227273
504	DESERT_PERIPORTAL_HEPATOCELLULAR_CARCINOMA_SUBCLASS_UP	27	0.421985	1.547	0.0227273
505	GAUCHER_PBMC_YF_VAX_STAMARIL_UNKNOWN_AGE_14DY_UP	19	0.455616	1.54574	0.0227273
506	GOBP_NEURAL_PRECURSOR_CELL_PROLIFERATION	35	0.386043	1.54442	0.0227273
507	GNF2_ELAC2	19	0.432799	1.48052	0.0227273
508	HP_TONIC_SEIZURE	19	0.496193	1.74778	0.0232558
509	GOBP_MRNA_EXPORT_FROM_NUCLEUS	32	0.404709	1.60693	0.0232558
510	MIR6801_5P	19	0.478041	1.53873	0.0232558
511	GOCC_NUCLEAR_CHROMOSOME	74	0.334714	1.53471	0.0232558
512	GOCC_CYTOPLASMIC_REGION	64	0.326213	1.50183	0.0232558
513	BMI1_DN_MEL18_DN.V1_DN	36	0.426061	1.75948	0.0238095
514	YEGNASUBRAMANIAN_PROSTATE_CANCER	32	0.440492	1.7174	0.0238095
515	GNF2_ESPL1	22	0.447395	1.70686	0.0238095
516	REACTOME_ACTIVATION_OF_THE_PRE_REPLICATIVE_COMPLEX	18	0.481611	1.6414	0.0238095
517	REN_BOUND_BY_E2F	24	0.453563	1.61177	0.0238095
518	MIR4534	39	0.384698	1.56604	0.0238095
519	MORF_PRKDC	64	0.356728	1.55816	0.0238095
520	GOBP_RIBOSOMAL_LARGE_SUBUNIT_BIOGENESIS	26	0.433217	1.51575	0.0238095
521	GSE24634_TEFF_VS_TCONV_DAY5_IN_CULTURE_UP	71	0.290423	1.51259	0.0238095
522	GOBP_ACTION_POTENTIAL	31	0.391446	1.47753	0.0238095
523	AAAYRNCTG_UNKNOWN	99	0.280506	1.44022	0.0238095
524	MORF_RAD21	48	0.336159	1.43224	0.0238095
525	MORF_HDAC1	89	0.316206	1.62962	0.0243902
526	HP_ABNORMAL_CONSUMPTION_BEHAVIOR	25	0.452968	1.61971	0.0243902
527	HP_COLOR_VISION_DEFECT	21	0.46302	1.60732	0.0243902
528	VERHAAK_GLIOBLASTOMA_NEURAL	31	0.394794	1.52776	0.0243902
529	GOCC_MITOCHONDRIAL_PROTEIN_CONTAINING_COMPLEX	73	0.325702	1.51628	0.0243902
530	GOBP_HEART_PROCESS	76	0.302697	1.46503	0.0243902
531	MIR548L	81	0.284347	1.43641	0.0243902
532	HP_INTELLECTUAL_DISABILITY_MILD	82	0.31143	1.43784	0.0243902
533	E2F1_Q6_01	78	0.282925	1.32873	0.0243902
534	GSE1460_NAIVE_CD4_TCELL_CORD_BLOOD_VS_THYMIC_STROMAL_CELL_UP	46	0.405674	1.781	0.025
535	GOBP_REGULATION_OF_DENDRITE_DEVELOPMENT	30	0.482135	1.76664	0.025
536	MIR4678	22	0.467061	1.72822	0.025
537	HP_PROGRESSIVE_NIGHT_BLINDNESS	17	0.495775	1.68205	0.025
538	HP_NYCTALOPIA	38	0.380422	1.63983	0.025
539	ALK_DN.V1_DN	23	0.480679	1.61823	0.025
540	MORF_TERF1	21	0.450247	1.60497	0.025
541	GNF2_CCNB2	24	0.45128	1.58071	0.025
542	GSE43863_NAIVE_VS_LY6C_INT_CXCR5POS_CD4_EFF_TCELL_D6_LCMV_DN	26	0.436038	1.56322	0.025
543	BLANCO_MELO_BETA_INTERFERON_TREATED_BRONCHIAL_EPITHELIAL_CELLS_DN	47	0.35493	1.55226	0.025
544	GOBP_INORGANIC_ANION_TRANSMEMBRANE_TRANSPORT	24	0.406508	1.54894	0.025
545	GSE20715_0H_VS_6H_OZONE_TLR4_KO_LUNG_UP	44	0.371606	1.54166	0.025
546	REACTOME_MITOCHONDRIAL_PROTEIN_IMPORT	27	0.442981	1.52823	0.025
547	GOMF_CATALYTIC_ACTIVITY_ACTING_ON_A_TRNA	33	0.381143	1.52228	0.025
548	GATA1_01	59	0.31588	1.50591	0.025
549	HP_EPILEPTIC_SPASM	41	0.369447	1.44448	0.025
550	GSE24634_TREG_VS_TCONV_POST_DAY3_IL4_CONVERSION_UP	84	0.311458	1.42997	0.025
551	GSE3982_DC_VS_NKCELL_DN	48	0.296642	1.35377	0.025
552	GSE13306_TREG_RA_VS_TCONV_RA_DN	50	0.449628	1.88301	0.025641
553	KRAS.KIDNEY_UP.V1_UP	43	0.419666	1.68103	0.025641
554	TAXCREB_01	47	0.393431	1.67165	0.025641
555	GOBP_RETINA_HOMEOSTASIS	20	0.422614	1.63692	0.025641
556	KRAS.300_UP.V1_UP	42	0.370438	1.58188	0.025641
557	REACTOME_L1CAM_INTERACTIONS	39	0.382295	1.48419	0.025641
558	GSE22611_NOD2_TRANSD_VS_CTRL_TRANSD_HEK293_MDP_STIM_2H_DN	24	0.394677	1.47949	0.025641
559	MEISSNER_NPC_HCP_WITH_H3K4ME2_AND_H3K27ME3	59	0.334321	1.47752	0.025641
560	FOSTER_KDM1A_TARGETS_UP	53	0.301584	1.43187	0.025641
561	WINNEPENNINCKX_MELANOMA_METASTASIS_UP	64	0.317233	1.42415	0.025641
562	GSE18791_CTRL_VS_NEWCASTLE_VIRUS_DC_1H_DN	46	0.323547	1.35141	0.025641
563	GSE3982_EFF_MEMORY_VS_CENT_MEMORY_CD4_TCELL_DN	43	0.475396	1.90954	0.0263158
564	GOMF_STRUCTURAL_CONSTITUENT_OF_RIBOSOME	43	0.41922	1.87074	0.0263158
565	GNF2_CKS1B	21	0.457648	1.74639	0.0263158
566	EGR_Q6	64	0.344657	1.63644	0.0263158
567	ZHAN_MULTIPLE_MYELOMA_PR_UP	18	0.452108	1.62181	0.0263158
568	GOBP_RIBONUCLEOPROTEIN_COMPLEX_SUBUNIT_ORGANIZATION	64	0.361627	1.59721	0.0263158
569	HP_OPEN_MOUTH	24	0.413579	1.57283	0.0263158
570	FXR_IR1_Q6	30	0.412748	1.56401	0.0263158
571	GOCC_LARGE_RIBOSOMAL_SUBUNIT	31	0.412723	1.50682	0.0263158
572	HP_POSTNATAL_GROWTH_RETARDATION	44	0.353596	1.49229	0.0263158
573	BILD_E2F3_ONCOGENIC_SIGNATURE	68	0.3372	1.49087	0.0263158
574	MIR3074_5P	43	0.366688	1.48619	0.0263158
575	DURANTE_ADULT_OLFACTORY_NEUROEPITHELIUM_GLOBOSE_BASAL_CELLS	16	0.437308	1.43387	0.0263158
576	KIM_ALL_DISORDERS_DURATION_CORR_DN	60	0.302752	1.35512	0.0263158
577	MIR1207_5P	105	0.256196	1.33967	0.0263158
578	P53_DN.V1_DN	60	0.298331	1.33152	0.0263158
579	GSE41176_WT_VS_TAK1_KO_ANTI_IGM_STIM_BCELL_1H_DN	32	0.424137	1.81839	0.027027
580	HP_FOCAL_ONSET_SEIZURE	61	0.35921	1.67504	0.027027
581	NAKAYAMA_SOFT_TISSUE_TUMORS_PCA2_DN	19	0.505154	1.67398	0.027027
582	GSE2770_UNTREATED_VS_IL4_TREATED_ACT_CD4_TCELL_2H_DN	59	0.365098	1.56918	0.027027
583	GSE1460_DP_THYMOCYTE_VS_THYMIC_STROMAL_CELL_UP	46	0.372129	1.55048	0.027027
584	MIKKELSEN_NPC_HCP_WITH_H3K4ME3_AND_H3K27ME3	51	0.363942	1.54964	0.027027
585	ESC_V6.5_UP_EARLY.V1_UP	37	0.356548	1.51718	0.027027
586	GSE21379_TFH_VS_NON_TFH_CD4_TCELL_DN	45	0.3547	1.49698	0.027027
587	MIR4692	58	0.317711	1.39658	0.027027
588	AREB6_03	79	0.290034	1.36764	0.027027
589	GSE37301_LYMPHOID_PRIMED_MPP_VS_RAG2_KO_NK_CELL_DN	52	0.313248	1.33361	0.027027
590	GOBP_CELL_FATE_SPECIFICATION	22	0.444662	1.69472	0.0277778
591	GSE41978_WT_VS_ID2_KO_KLRG1_LOW_EFFECTOR_CD8_TCELL_UP	47	0.394303	1.65503	0.0277778
592	GOBP_RRNA_METABOLIC_PROCESS	74	0.351228	1.59144	0.0277778
593	TFIII_Q6	62	0.346056	1.53955	0.0277778
594	DESCARTES_FETAL_LUNG_NEUROENDOCRINE_CELLS	15	0.524259	1.5351	0.0277778
595	GSE15930_STIM_VS_STIM_AND_TRICHOSTATINA_24H_CD8_T_CELL_UP	45	0.340833	1.46619	0.0277778
596	GNF2_HMMR	21	0.447308	1.43156	0.0277778
597	HEB_Q6	76	0.299937	1.43259	0.0277778
598	MIR6735_5P	23	0.393567	1.42762	0.0277778
599	HP_CEREBELLAR_ATROPHY	99	0.27022	1.36754	0.0277778
600	MODULE_198	120	0.255928	1.32753	0.0277778
601	MIR6885_3P	99	0.257557	1.29795	0.0277778
602	YTATTTTNR_MEF2_02	177	0.218943	1.24862	0.0277778
603	MIR1283	113	0.238792	1.2308	0.0277778
604	GSE18791_CTRL_VS_NEWCASTLE_VIRUS_DC_1H_UP	26	0.513335	1.73825	0.0285714
605	GOBP_ADULT_LOCOMOTORY_BEHAVIOR	18	0.441415	1.53917	0.0285714
606	GOMF_ION_CHANNEL_BINDING	37	0.378021	1.53159	0.0285714
607	REACTOME_G2_M_CHECKPOINTS	39	0.367044	1.46343	0.0285714
608	IK3_01	49	0.33212	1.42943	0.0285714
609	MYCMAX_02	67	0.301502	1.39575	0.0285714
610	MIR6715B_5P	59	0.299875	1.35407	0.0285714
611	CHR19P13	142	0.270324	1.35339	0.0285714
612	GSE21063_WT_VS_NFATC1_KO_8H_ANTI_IGM_STIM_BCELL_UP	73	0.279346	1.32292	0.0285714
613	ZID_01	70	0.270128	1.30146	0.0285714
614	GOMF_MRNA_BINDING	81	0.267983	1.26174	0.0285714
615	ETF_Q6	31	0.42698	1.64141	0.0294118
616	DESCARTES_FETAL_THYMUS_THYMIC_EPITHELIAL_CELLS	54	0.412495	1.6353	0.0294118
617	MIR6837_5P	39	0.375916	1.55541	0.0294118
618	GOBP_DENDRITE_MORPHOGENESIS	43	0.355393	1.49133	0.0294118
619	GSE15930_STIM_VS_STIM_AND_IL12_24H_CD8_T_CELL_DN	49	0.343511	1.47089	0.0294118
620	SMAD3_Q6	61	0.30777	1.36032	0.0294118
621	GSE26023_PHD3_KO_VS_WT_NEUTROPHIL_HYPOXIA_UP	55	0.28826	1.31317	0.0294118
622	REACTOME_SARS_COV_INFECTIONS	49	0.345829	1.57591	0.030303
623	MIR4685_5P	40	0.372932	1.57134	0.030303
624	SRC_UP.V1_UP	36	0.375544	1.52518	0.030303
625	HP_HYPSARRHYTHMIA	41	0.333886	1.51653	0.030303
626	ZHONG_PFC_C3_ASTROCYTE	103	0.308535	1.49003	0.030303
627	WELCSH_BRCA1_TARGETS_DN	59	0.318254	1.45515	0.030303
628	FAN_EMBRYONIC_CTX_ASTROCYTE_2	53	0.388443	1.68354	0.03125
629	MORF_SOD1	88	0.351918	1.678	0.03125
630	NGFIC_01	64	0.357518	1.62234	0.03125
631	MANNO_MIDBRAIN_NEUROTYPES_HPROGBP	110	0.297833	1.55962	0.03125
632	GOBP_METENCEPHALON_DEVELOPMENT	31	0.363535	1.50905	0.03125
633	GSE15930_STIM_VS_STIM_AND_TRICHOSTATINA_72H_CD8_T_CELL_UP	49	0.341251	1.42255	0.03125
634	GOCC_SPLICEOSOMAL_COMPLEX	64	0.385376	1.74041	0.0322581
635	HP_DELAYED_SPEECH_AND_LANGUAGE_DEVELOPMENT	188	0.23991	1.34331	0.0322581
636	GOBP_REGULATION_OF_ION_TRANSPORT	330	0.204025	1.19766	0.0322581
637	GSE21546_ELK1_KO_VS_SAP1A_KO_AND_ELK1_KO_DP_THYMOCYTES_DN	75	0.317257	1.46957	0.0333333
638	MIR6734_5P	20	0.405329	1.43182	0.0333333
639	GOBP_NEURON_PROJECTION_GUIDANCE	69	0.300097	1.37867	0.0333333
640	HP_DIFFICULTY_WALKING	68	0.278855	1.2687	0.0333333
641	REACTOME_NERVOUS_SYSTEM_DEVELOPMENT	174	0.225838	1.25313	0.0333333
642	GOBP_CELL_MORPHOGENESIS_INVOLVED_IN_DIFFERENTIATION	218	0.252272	1.38676	0.0344828
643	CCCNNGGGAR_OLF1_01	84	0.283221	1.38864	0.0357143
644	WTTGKCTG_UNKNOWN	147	0.240762	1.22805	0.0357143
645	MORF_G22P1	68	0.365481	1.70526	0.037037
646	MIR4739	45	0.334788	1.46881	0.037037
647	GNF2_NS	18	0.453668	1.51703	0.0384615
648	HP_ABNORMALITY_OF_THE_INNER_EAR	227	0.205255	1.20223	0.0384615
649	MORF_UBE2N	34	0.442383	1.65827	0.0392157
650	MURARO_PANCREAS_PANCREATIC_POLYPEPTIDE_CELL	44	0.368415	1.56848	0.0392157
651	HP_TYPICAL_ABSENCE_SEIZURE	15	0.494568	1.56239	0.0392157
652	LIU_PROSTATE_CANCER_UP	31	0.381433	1.40154	0.0392157
653	GOCC_POSTSYNAPTIC_SPECIALIZATION_MEMBRANE	24	0.419669	1.58209	0.04
654	GOBP_TRANSMISSION_OF_NERVE_IMPULSE	15	0.496712	1.5544	0.04
655	WYAAANNRNNNGCG_UNKNOWN	17	0.433938	1.51052	0.04
656	NIKOLSKY_BREAST_CANCER_8Q23_Q24_AMPLICON	39	0.340398	1.43449	0.04
657	REACTOME_TRANSPORT_OF_INORGANIC_CATIONS_ANIONS_AND_AMINO_ACIDS_ OLIGOPEPTIDES	24	0.375828	1.33041	0.04
658	CAHOY_ASTROCYTIC	29	0.409025	1.55763	0.0408163
659	GSE14413_UNSTIM_VS_IFNB_STIM_RAW264_CELLS_DN	27	0.424287	1.52322	0.0408163
660	GOBP_NEGATIVE_REGULATION_OF_LIPID_METABOLIC_PROCESS	22	0.46345	1.43642	0.0408163
661	MIR3929	22	0.41749	1.39787	0.0408163
662	WP_SUDDEN_INFANT_DEATH_SYNDROME_SIDS_SUSCEPTIBILITY_PATHWAYS	40	0.404482	1.58254	0.0416667
663	MIR130B_5P	53	0.340295	1.48691	0.0416667
664	MIR629_5P	30	0.379531	1.48395	0.0416667
665	MIR363_5P	20	0.406342	1.45011	0.0416667
666	HP_ABNORMAL_SPERMATOGENESIS	17	0.47269	1.43557	0.0416667
667	NFE2L2.V2	111	0.272642	1.34426	0.0416667
668	GOCC_CHROMATIN	265	0.212282	1.25167	0.0416667
669	GOBP_THIOESTER_BIOSYNTHETIC_PROCESS	15	0.535535	1.71652	0.0425532
670	HP_ABNORMALITY_OF_THE_SENSE_OF_SMELL	21	0.45414	1.64116	0.0425532
671	BILBAN_B_CLL_LPL_UP	16	0.472861	1.62052	0.0425532
672	WOO_LIVER_CANCER_RECURRENCE_DN	19	0.44294	1.62112	0.0425532
673	GSE22935_UNSTIM_VS_48H_MBOVIS_BCG_STIM_MYD88_KO_MACROPHAGE_UP	51	0.354667	1.45554	0.0425532
674	PUJANA_BRCA2_PCC_NETWORK	153	0.282695	1.4424	0.0425532
675	GOBP_AMINO_ACID_IMPORT	20	0.436936	1.40554	0.0425532
676	BLANCO_MELO_RESPIRATORY_SYNCYTIAL_VIRUS_INFECTION_A594_CELLS_DN	21	0.425855	1.40376	0.0425532
677	REACTOME_NUCLEAR_EVENTS_KINASE_AND_TRANSCRIPTION_FACTOR_ACTIVATION	24	0.454798	1.72533	0.0434783
678	MIR574_5P	21	0.455054	1.5813	0.0434783
679	GNF2_ST13	19	0.444513	1.49431	0.0434783
680	GNF2_MSH6	19	0.448007	1.44306	0.0434783
681	OCT1_07	41	0.3242	1.30136	0.0434783
682	CHESLER_BRAIN_HIGHEST_EXPRESSION	16	0.493402	1.63052	0.0444444
683	GOBP_NUCLEAR_TRANSCRIBED_MRNA_CATABOLIC_PROCESS_NONSENSE_MEDIATED_ DECAY	31	0.41567	1.52619	0.0444444
684	HP_RHINITIS	16	0.42412	1.52428	0.0444444
685	REACTOME_MITOCHONDRIAL_TRANSLATION	24	0.40256	1.51104	0.0444444
686	MODULE_57	28	0.417636	1.48904	0.0444444
687	GCM_NPM1	43	0.351821	1.45755	0.0444444
688	GOBP_POSITIVE_REGULATION_OF_NEURON_PROJECTION_DEVELOPMENT	49	0.348347	1.45529	0.0444444
689	ROSS_AML_WITH_PML_RARA_FUSION	23	0.402091	1.44583	0.0444444
690	LIN_NPAS4_TARGETS_DN	23	0.390138	1.43914	0.0444444
691	GOBP_NCRNA_3_END_PROCESSING	17	0.449466	1.43771	0.0444444
692	GNF2_TDG	19	0.440608	1.4265	0.0444444
693	HP_ATONIC_SEIZURE	20	0.414261	1.41589	0.0444444
694	HP_DECREASED_FERTILITY_IN_FEMALES	16	0.424127	1.3981	0.0444444
	* ES denotes Enrichment Score
	# NES denotes Normalized Enrichment Score
	^ NOM p-vaue denotes normal p-value, p-value<0.05 is considered statistically significant
