# Supplementary material for: Differentiated glioma cell-derived fibromodulin activates integrin-dependent Notch signaling in endothelial cells to promote tumor angiogenesis and growth
Source: eLife. 2022 Jun 1;11:e78972. doi: 10.7554/eLife.78972 (PMC9259034; doi:10.7554/eLife.78972)
Supplement: Supplementary file 3. [file elife-78972-supp3.xlsx]

## Sheet: ANOVA p-values
Supplementary File 3: ANOVA values between the diffferent groups of the in vivo co-implantation mouse model experiment
Time-point	28 days post-injection					Time-point	33 days post-injection
ANOVA summary						ANOVA summary
F	22.63					F	41.95
P value	< 0.0001					P value	< 0.0001
P value summary	****					P value summary	****
Are differences among means statistically significant? (P < 0.05)	Yes					Are differences among means statistically significant? (P < 0.05)	Yes
R square	0.8694					R square	0.925
Tukey's multiple comparisons test	Mean Diff.	95% CI of diff.	Significant?	Summary		Tukey's multiple comparisons test	Mean Diff.	95% CI of diff.	Significant?	Summary
GSC+shNT(Dox-) vs. GSC+shNT(Dox+)	-0.167	-1.164 to 0.8304	No	ns		GSC+shNT(Dox-) vs. GSC+shNT(Dox+)	0.147	-0.5509 to 0.8449	No	ns
GSC+shNT(Dox-) vs. GSC+shFMOD (Dox-)	-0.157	-1.049 to 0.7350	No	ns		GSC+shNT(Dox-) vs. GSC+shFMOD (Dox-)	0.2555	-0.3687 to 0.8798	No	ns
GSC+shNT(Dox-) vs. GSC+shFMOD (Dox+)	1.766	0.8334 to 2.699	Yes	***		GSC+shNT(Dox-) vs. GSC+shFMOD (Dox+)	1.814	1.162 to 2.467	Yes	****
GSC+shNT(Dox-) vs. GSC	0.4186	-0.5144 to 1.352	No	ns		GSC+shNT(Dox-) vs. GSC	0.6777	0.02481 to 1.331	Yes	*
GSC+shNT(Dox-) vs. DGC	1.744	0.8109 to 2.677	Yes	***		GSC+shNT(Dox-) vs. DGC	2.046	1.394 to 2.699	Yes	****
GSC+shNT(Dox+) vs. GSC+shFMOD (Dox-)	0.009965	-0.8821 to 0.9020	No	ns		GSC+shNT(Dox+) vs. GSC+shFMOD (Dox-)	0.1085	-0.5157 to 0.7328	No	ns
GSC+shNT(Dox+) vs. GSC+shFMOD (Dox+)	1.933	1.000 to 2.866	Yes	****		GSC+shNT(Dox+) vs. GSC+shFMOD (Dox+)	1.667	1.015 to 2.320	Yes	****
GSC+shNT(Dox+) vs. GSC	0.5856	-0.3474 to 1.519	No	ns		GSC+shNT(Dox+) vs. GSC	0.5307	-0.1222 to 1.184	No	ns
GSC+shNT(Dox+) vs. DGC	1.911	0.9779 to 2.844	Yes	****		GSC+shNT(Dox+) vs. DGC	1.899	1.247 to 2.552	Yes	****
GSC+shFMOD (Dox-) vs. GSC+shFMOD (Dox+)	1.923	1.104 to 2.743	Yes	****		GSC+shFMOD (Dox-) vs. GSC+shFMOD (Dox+)	1.559	0.9855 to 2.132	Yes	****
GSC+shFMOD (Dox-) vs. GSC	0.5756	-0.2438 to 1.395	No	ns		GSC+shFMOD (Dox-) vs. GSC	0.4221	-0.1513 to 0.9955	No	ns
GSC+shFMOD (Dox-) vs. DGC	1.901	1.081 to 2.720	Yes	****		GSC+shFMOD (Dox-) vs. DGC	1.791	1.217 to 2.364	Yes	****
GSC+shFMOD (Dox+) vs. GSC	-1.348	-2.211 to -0.4840	Yes	**		GSC+shFMOD (Dox+) vs. GSC	-1.137	-1.741 to -0.5323	Yes	***
GSC+shFMOD (Dox+) vs. DGC	-0.0225	-0.8862 to 0.8412	No	ns		GSC+shFMOD (Dox+) vs. DGC	0.232	-0.3725 to 0.8364	No	ns
GSC vs. DGC	1.325	0.4615 to 2.189	Yes	**		GSC vs. DGC	1.369	0.7643 to 1.973	Yes	****
*=p<0.05
**=p<0.01
***=p<0.001
***=p<0.0001
