# Supplementary material for: Differentiated glioma cell-derived fibromodulin activates integrin-dependent Notch signaling in endothelial cells to promote tumor angiogenesis and growth
Source: eLife. 2022 Jun 1;11:e78972. doi: 10.7554/eLife.78972 (PMC9259034; doi:10.7554/eLife.78972)
Supplement: Supplementary file 4. — (A) List of primers used in this study. (B) List of shRNAs used in the study; all IDs are of Sigma TRC whole-genome shRNA library. (C) List of inhibitors. [file elife-78972-supp4.xlsx]

## Sheet: 4A.Primers
Supplementary File 4A: List of primers used in this study
S.No.	Gene	Forward primer (5'-3')	Reverse Primer (5'-3')
1	FMOD	ACCTGCAGCTTGGAGAAGT	CAACACCAACCTGGAGAACC
2	SOX2	AACCCCAAGATGCACAACTC	GCTTAGCCTCGTCGATGAAC
3	SALL2	TAATCTCGGACTGCGAAGGT	TAGAACATGCGTTCTGGTGG
4	POU3F2	TGACGATCTCCACGCAGTAG	GGCAGAAAGCTGTCCAAGTC
5	OLIG2	CCAGAGCCCGATGACCTTTT	AGGACGACTTGAAGCCACTG
6	DLL4	CTGCGAGAAGAAAGTGGACAGG	ACAGTCGCTGACGTGGAGTTCA
7	DLL3	CACTCAACAACCTAAGGACGCAG	GAGCGTAGATGGAAGGAGCAGA
8	JAG1	TGCTACAACCGTGCCAGTGACT	TCAGGTGTGTCGTTGGAAGCCA
9	JAG2	GCTGCTACGACCTGGTCAATGA	AGGTGTAGGCATCGCACTGGAA
10	HES1	GGAAATGACAGTGAAGCACCTCC	GAAGCGGGTCACCTCGTTCATG
11	Mouse FMOD	CCCTTACCCCTATGAGCCC	GACAGTCGCATTCTTGGGGA
12	OSMR	CATCCCGAAGCGAAGTCTTGG	GGCTGGGACAGTCCATTCTAAA
13	ACSBG1	GAACATCTGGTGCACGGTATAG	GAGGAAGCTGGTGGAGTATTG
14	ALDH1L	GAGGAAGCTGGTGGAGTATTG	ACGGTTGGCTGAAAGAAGAA
15	S100B	CCCTGTAGAAGAGTCACCTGTA	GCTGTGGGTCTGTAGATGTATG
16	GFAP	CGGAGACGCATCACCTCTG	AGGGAGTGGAGGAGTCATTCG
17	MELK	TATGAAACGATTGGGACAGGTG	CCCTAGCGCATTCTTATCCATGA
18	NESTIN	GGAATCTCTGAGGTCTCTTGATG	TCTGCTCCTCCTCTTCTACTT
19	BMI1	CAAGAAGAGGTGGAGGGAATAC	CCAGAGAGATGGACTGACAAAT
20	KLF4	GTGCCCCGACTAACCGTTG	GTCGTTGAACTCCTCGGTCT
21	TWIST2	CCAAGGCTCTCAGAACAAGAA	GGAGACGTAAAGAACAGGAGTATG
22	PTGS2	TGAGCAACTATTCCAAACCAGC	GCACGTAGTCTTCGATCACTATC
23	S100A6	ATGGCATGCCCTCTGGATCAG	TTATTTCAGAGCTTCATTGTAGATC
24	Cyclophilin	CAGACGCCACTGTCGCTTT	TGTCTTTGGAACTTTGTCTG
25	ATP5G	CCAGACGGGAGTTCCAGAC	GACGGGTTCCTGGCATAGC
26	GAPDH	TTGTCAAGCTCATTTCCTGG	TGATGGTACATGACAAGGTGC
27	cPPT (for sequencing)	GAAGGAATAGAAGAAGAAGGT GGAGAG
28	KLF8	CCTGAAAGCTCACCGCAGAATC	TGCTTGCGGAAATGGCGAGTGA
29	FOXP1	CAAAGAACGCCTGCAAGCCATG	GGAGTATGAGGTAAGCTCTGTGG
30	ETS1	GAGTCAACCCAGCCTATCCAGA	GAGCGTCTGATAGGACTCTGTG
31	GATA4	GCGGTGCTTCCAGCAACTCCA	GACATCGCACTGACTGAGAACG
32	ATF2	GGTAGCGGATTGGTTAGGACTC	TGCTCTTCTCCGACGACCACTT
33	ITGB1	GGATTCTCCAGAAGGTGGTTTCG	TGCCACCAAGTTTCCCATCTCC
34	ITGA6	CGAAACCAAGGTTCTGAGCCCA	CTTGGATCTCCACTGAGGCAGT
35	ITGAV	AGGAGAAGGTGCCTACGAAGCT	GCACAGGAAAGTCTTGCTAAGGC

## Sheet: 4B.shRNA clones
Supplementary File 4B: List of shRNAs used in the study (all IDs are of Sigma TRC whole-genome shRNA library
Sl.no	Gene Name	Clone 1	Clone 2	Clone 3	Clone 4	Clone 5
1	FMOD	TRCN0000153650	TRCN0000156734	TRCN0000152163	TRCN0000153199	TRCN0000151908
2	Mouse FMOD	TRCN0000094246	TRCN0000094245	TRCN0000094248	N/A	N/A
3	KLF8	TRCN0000015878	TRCN0000015879	TRCN0000015880	TRCN0000015881	TRCN0000015882
4	JAG1	TRCN0000033439	TRCN0000033440	TRCN0000033441	TRCN0000033442	TRCN0000033443
5	ITGA6	TRCN0000057773	TRCN0000057774	TRCN0000057775	TRCN0000057776	TRCN0000057777
6	ITGB1	TRCN0000275134	TRCN0000275133	TRCN0000275083	TRCN0000275135	TRCN0000275082
7	ITGAV	TRCN0000003238	TRCN0000003239	TRCN0000003240	TRCN0000003241	N/A

## Sheet: 4C. List of inhibitors
Supplementary File 4C: List of inhibitors used
S.No.	Inhibitor Name	Target Molecule	Catalog Number
1	Gamma- secretase inhibitor (GSI)	Gamma Secretase	565750 (Merck)
2	RGD Peptide	Integrins	A5082 (Sigma Aldrich)
3	PP2	Src	P0042 (Sigma Aldrich)
4	PP3	Structural analog to PP2	529574 (Calbiochem)
5	H1152	ROCK1	555550 (Calbiochem)
6	RAC1 inhibitor	RAC1	553502 (Sigma Aldrich)
7	PF573228	FAK	PZ0117 (Sigma Aldrich)
8	SB431542	TGFB RI	616464 (Sigma Aldrich)
