# Supplementary figures and images for: Differentiated glioma cell-derived fibromodulin activates integrin-dependent Notch signaling in endothelial cells to promote tumor angiogenesis and growth
Source: eLife journal article supplement (doi:10.7554/elife.78972), 2022-06-01

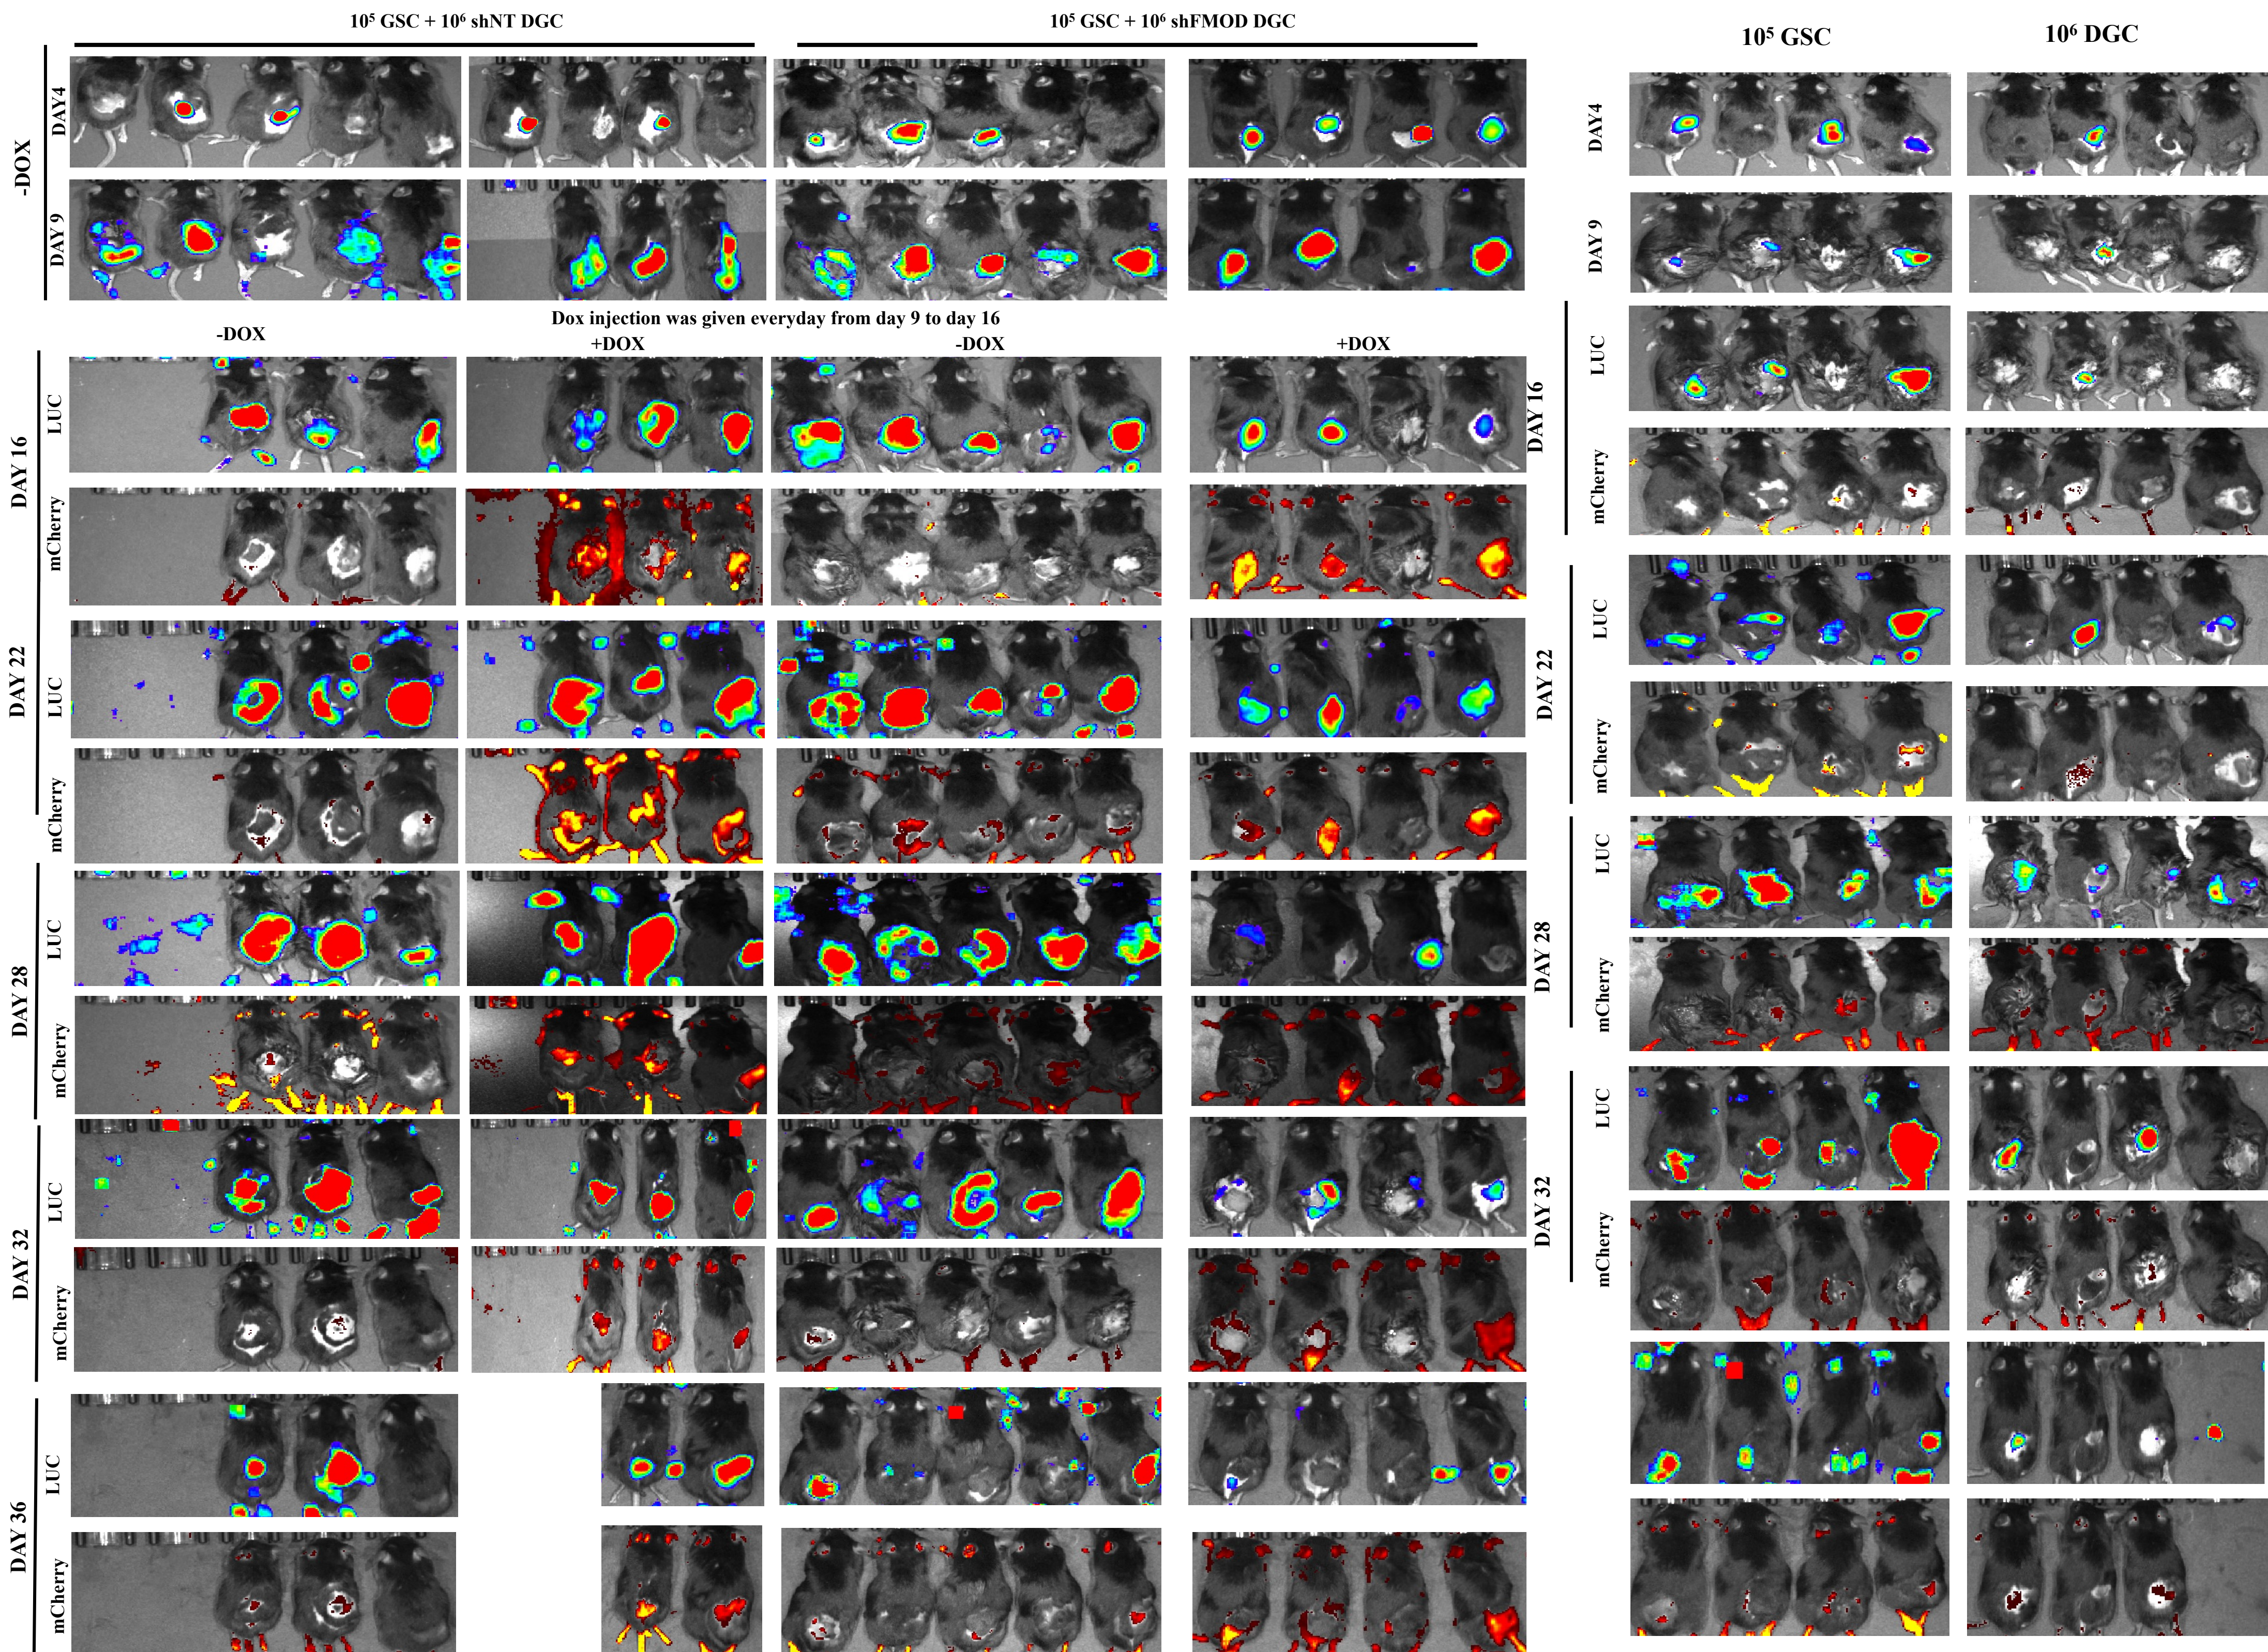

Supplement: fig2-data1 [file elife-78972-fig2-data1-v3.zip]

## Supplementary Figure 6

6A

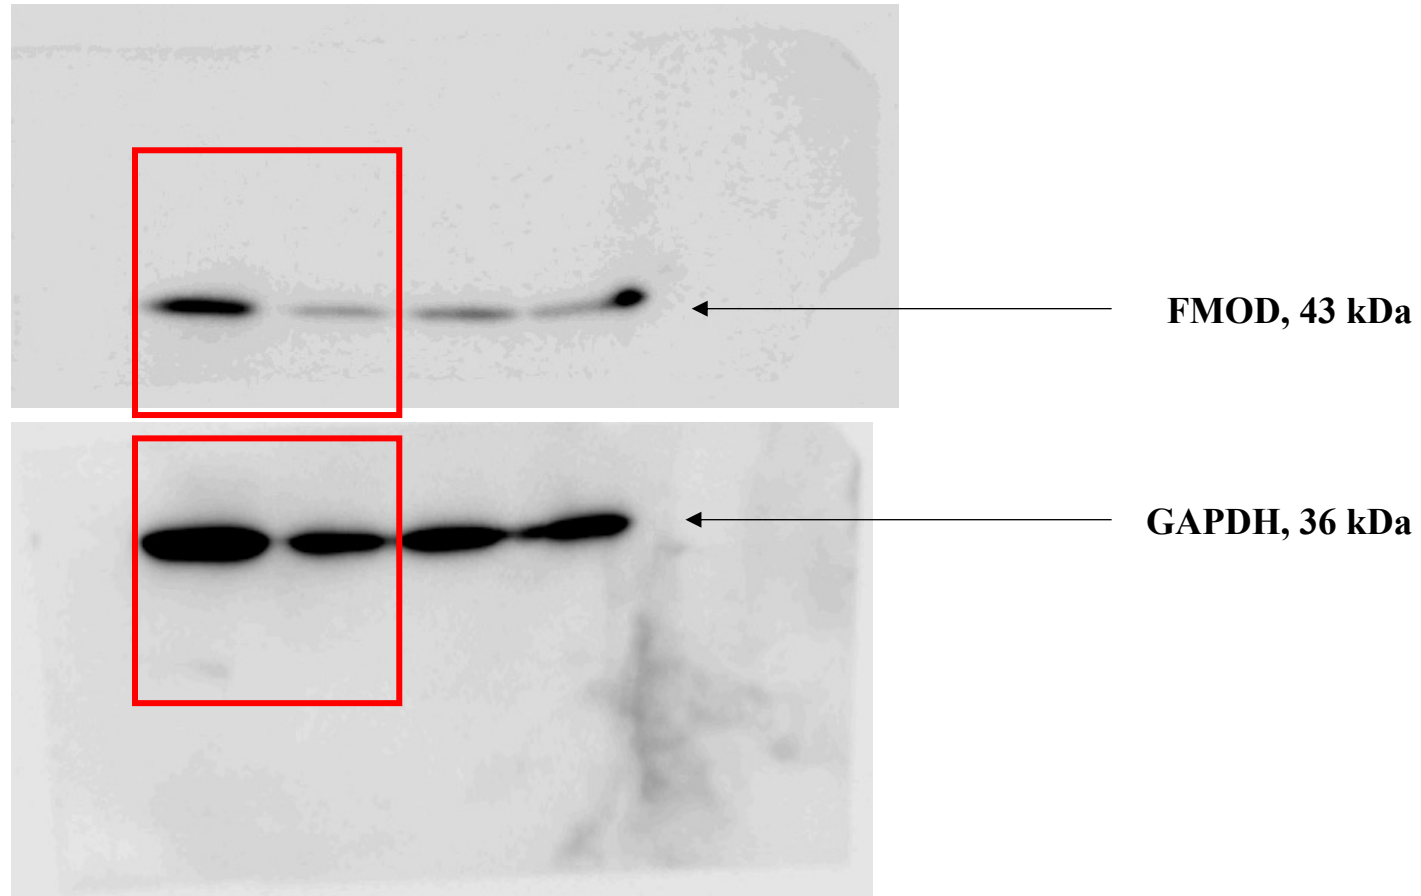

Supplement: fig2-figsupp1-data1 [file BLOT FOR PANEL A.pdf › Figure 2-Figure Supplement 1-Source Data/Figure 2-Figure supplement 1 Source Data A/BLOT FOR PANEL A.pdf]

**MGG8-GSC/  
shNT**

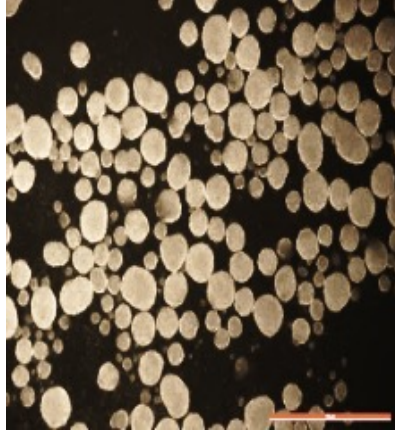

**MGG8-GSC/  
shFMOD**

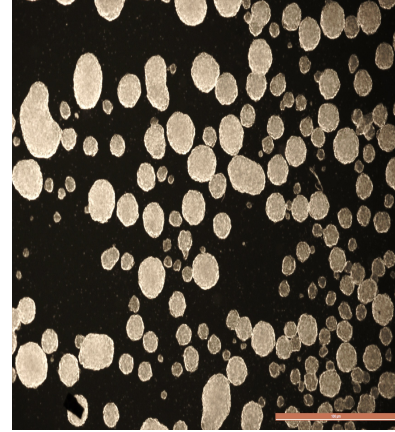

**MGG8-DGC/  
shNT**

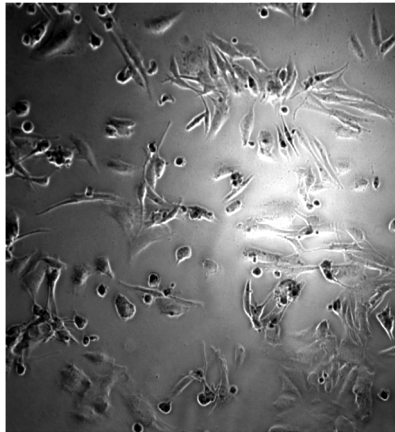

**MGG8-DGC/  
shFMOD**

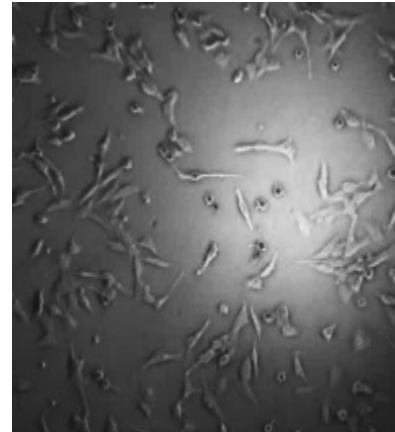

Supplement: fig2-figsupp1-data1 [file IMAGES FOR PANEL D.pdf › Figure 2-Figure Supplement 1-Source Data/Figure 2-Figure supplement 1 Source Data D/IMAGES FOR PANEL D.pdf]

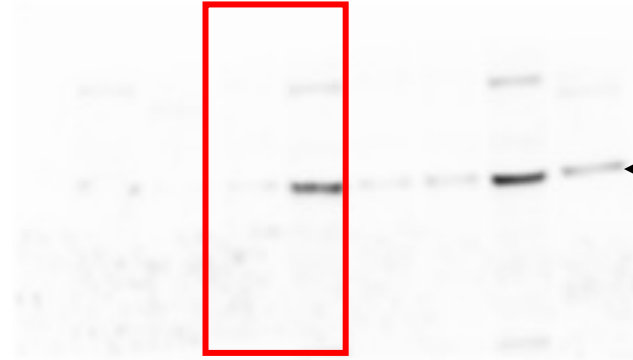

← **FMOD, 43 kDa**

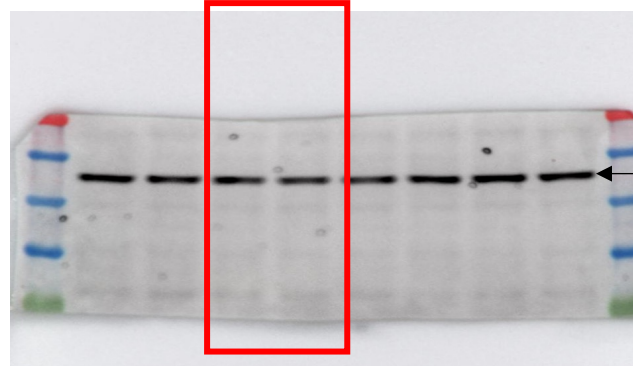

← **Tubulin, 50kDa**

Supplement: fig2-figsupp2-data1 [file BLOTS FOR PANEL B.pdf › Figure 2-Figure Supplement 2-Source Data/Figure 2-Figure supplement 2 Source Data B/BLOTS FOR PANEL B.pdf]

## Supplementary Figure 7

7C

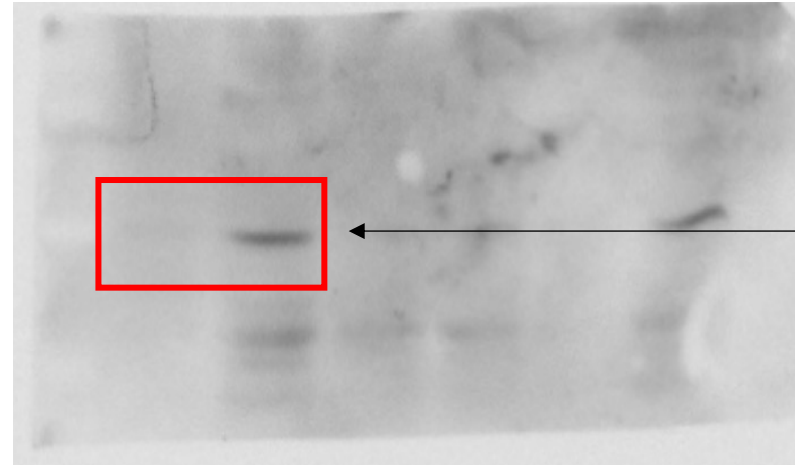

FMOD, 43 kDa

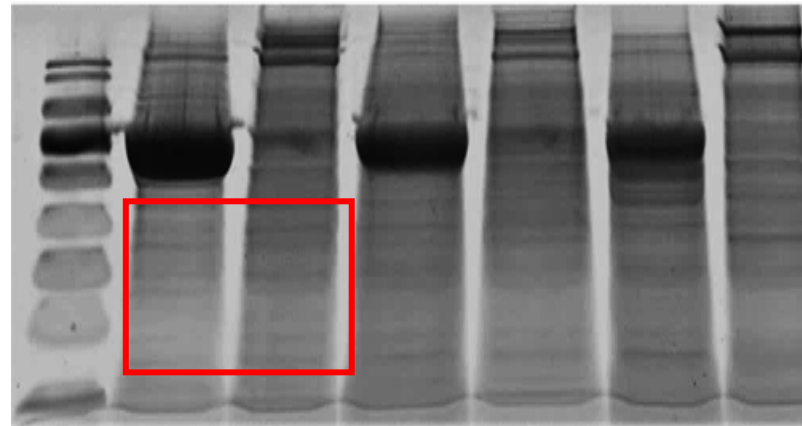

Ponceau stained membrane

Supplement: fig2-figsupp2-data1 [file BLOTS FOR PANEL C.pdf › Figure 2-Figure Supplement 2-Source Data/Figure 2-Figure supplement 2 Source Data C/BLOTS FOR PANEL C.pdf]

**7E**

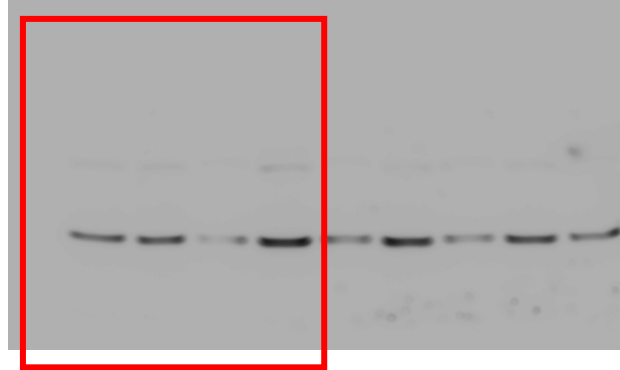

← **FMOD, 43 kDa**

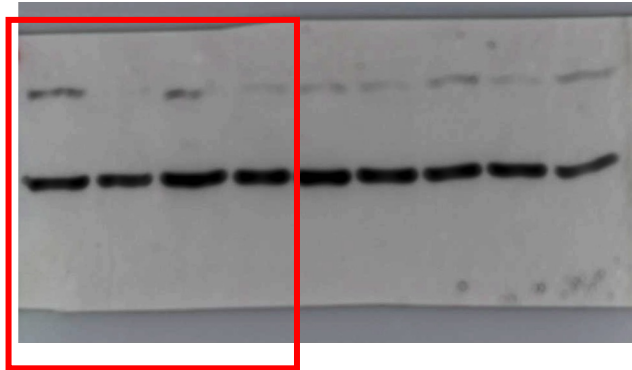

← **Tubulin, 50kDa**

Supplement: fig2-figsupp2-data1 [file BLOTS FOR PANEL E.pdf › Figure 2-Figure Supplement 2-Source Data/Figure 2-Figure supplement 2 Source Data E/BLOTS FOR PANEL E.pdf]

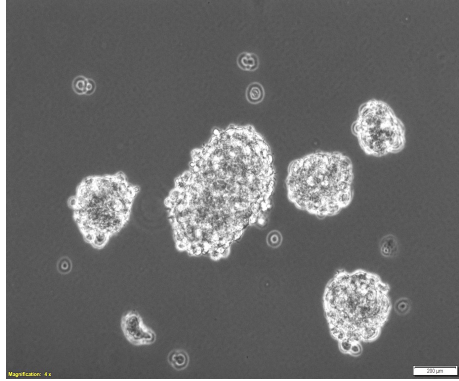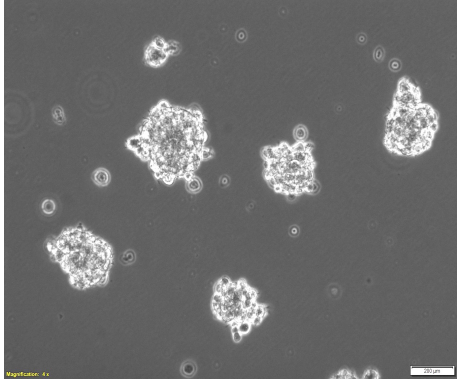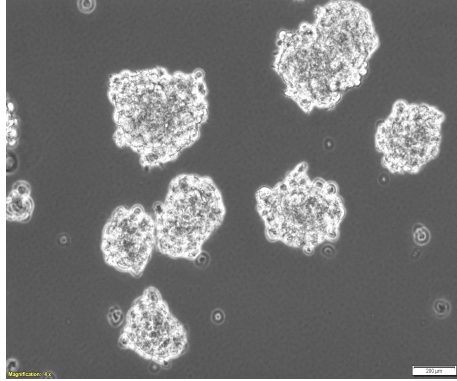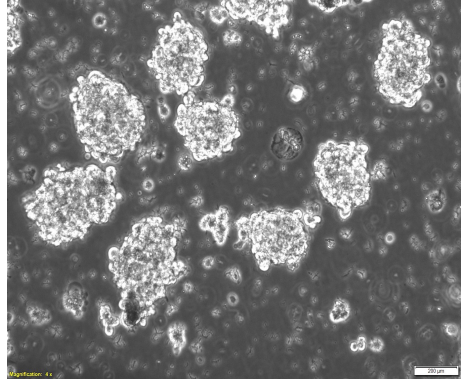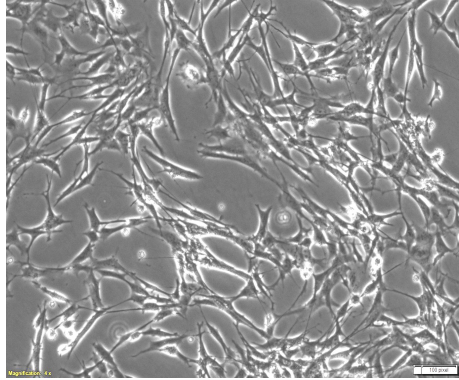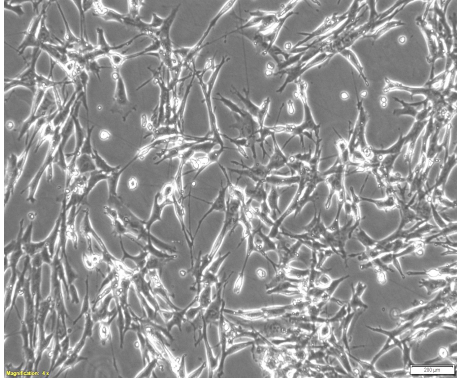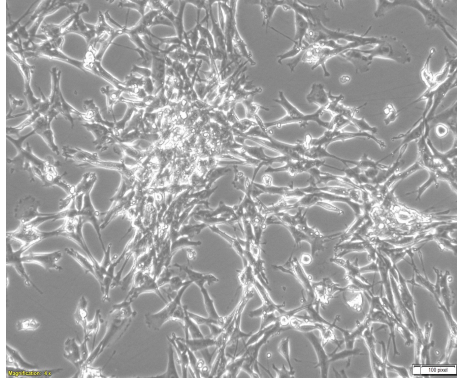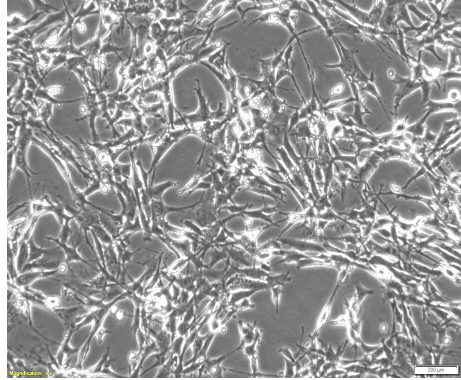

Supplement: fig2-figsupp3-data1 [file elife-78972-fig2-figsupp3-data1-v3.zip]

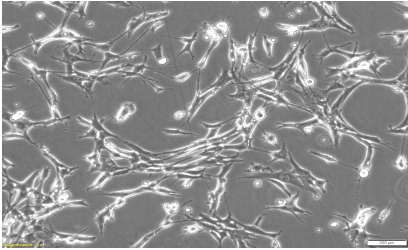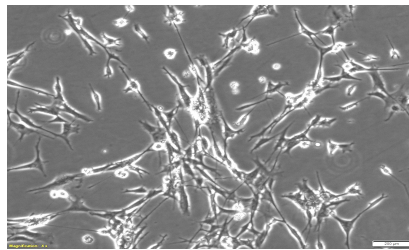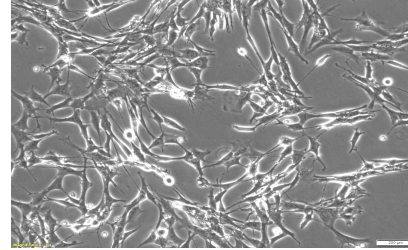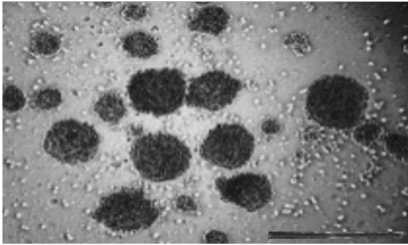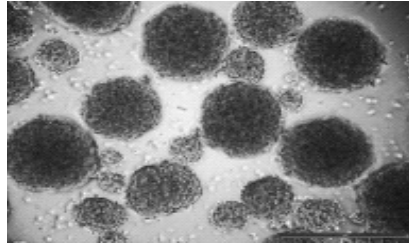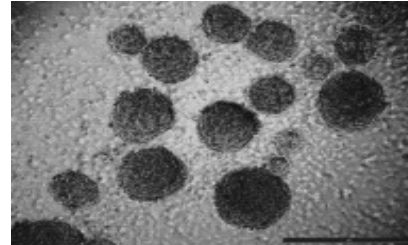

Supplement: fig2-figsupp4-data1 [file elife-78972-fig2-figsupp4-data1-v3.zip]

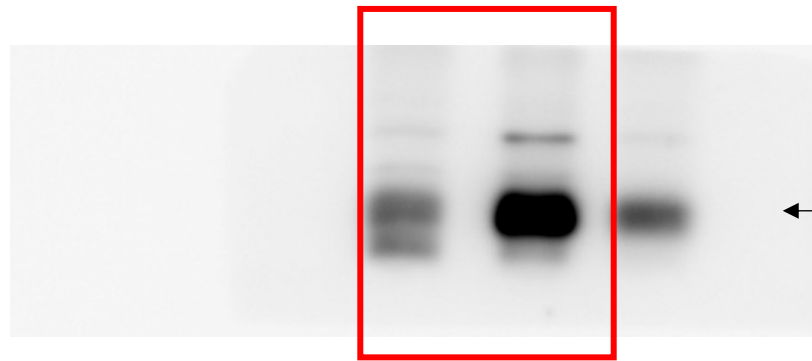

← **FMOD, 43 kDa**

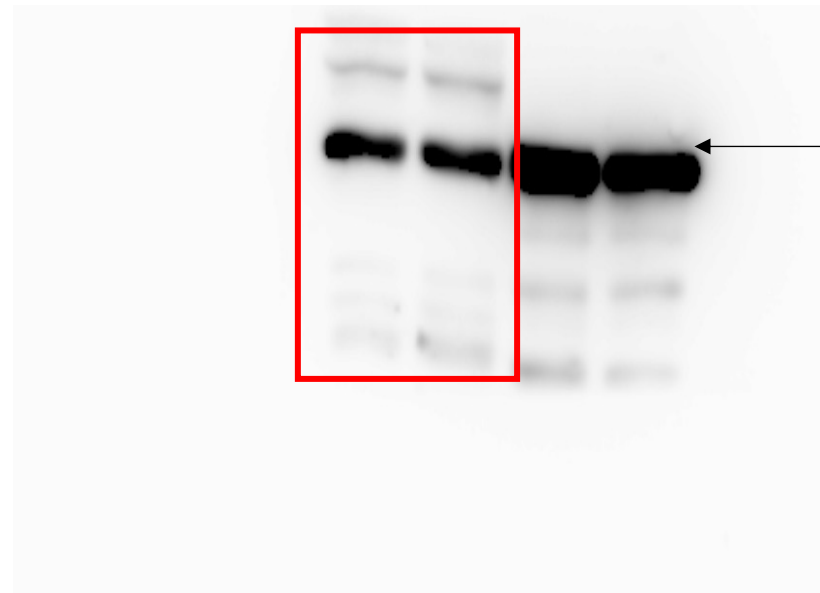

← **Tubulin, 50kDa**

Supplement: fig2-figsupp5-data1 [file BLOTS FOR PANEL D.pdf › Figure 2-Figure Supplement 5-Source Data/Figure 2-Figure supplement 5 Source Data D/BLOTS FOR PANEL D.pdf]

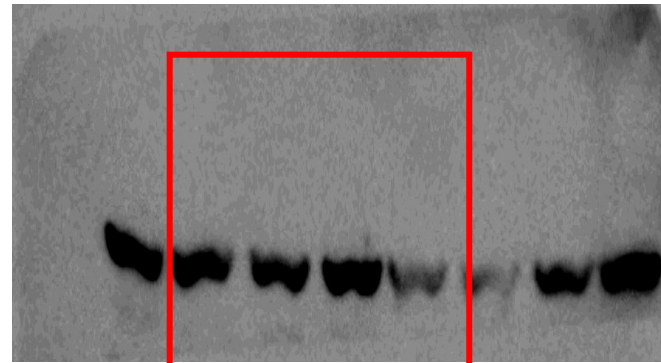

← **FMOD, 43 kDa**

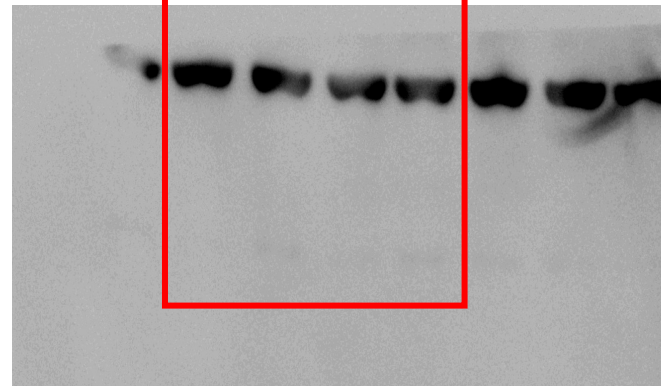

← **Tubulin, 50kDa**

Supplement: fig2-figsupp5-data1 [file BLOTS FOR PANEL F.pdf › Figure 2-Figure Supplement 5-Source Data/Figure 2-Figure supplement 5 Source Data F/BLOTS FOR PANEL F.pdf]

**DBT-Luc-DGC/miRNT (Dox+)**

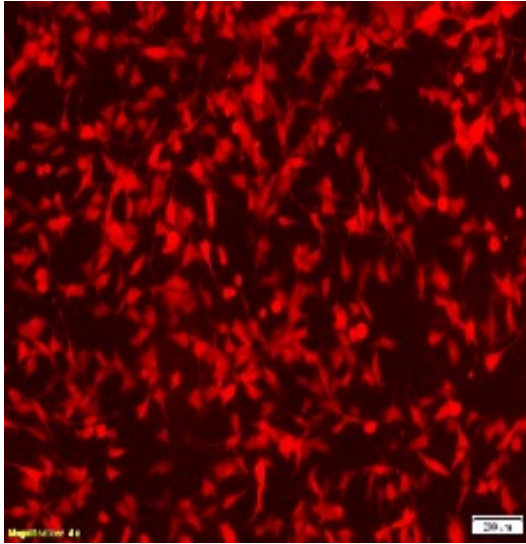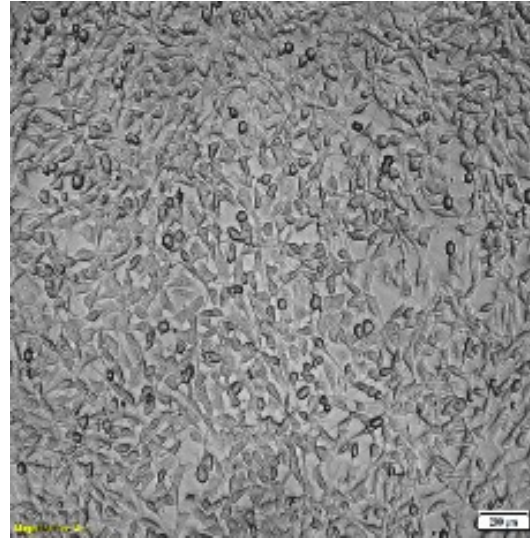

**DBT-Luc-DGC/miRFMOD (Dox+)**

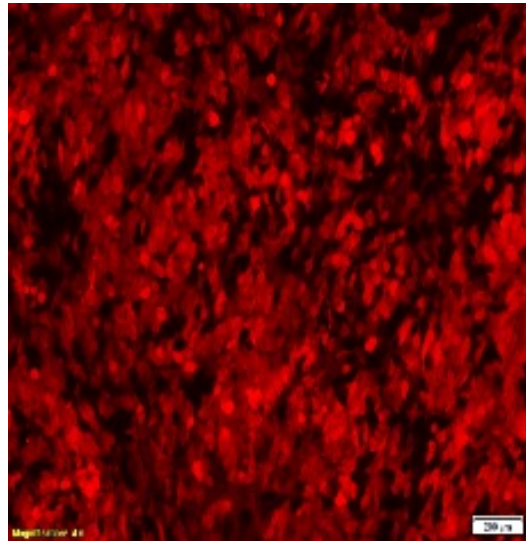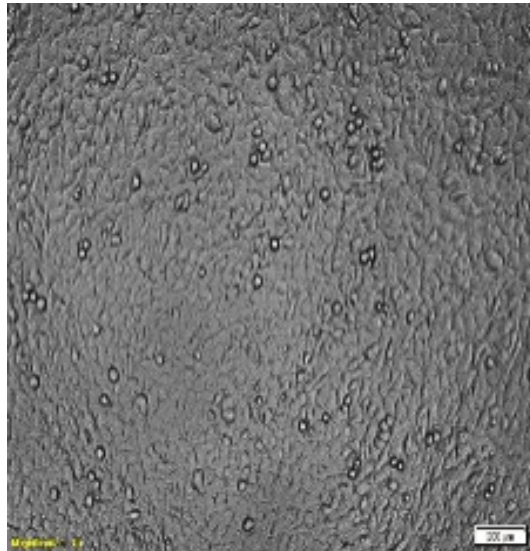

Supplement: fig2-figsupp5-data1 [file IMAGES FOR PANEL G.pdf › Figure 2-Figure Supplement 5-Source Data/Figure 2-Figure supplement 5 Source Data G/IMAGES FOR PANEL G.pdf]

**U251-DGC/  
shNT**

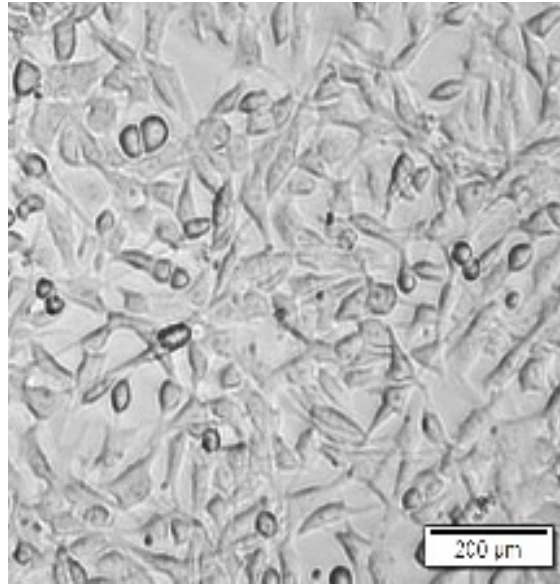

**U251-DGC/  
shFMOD**

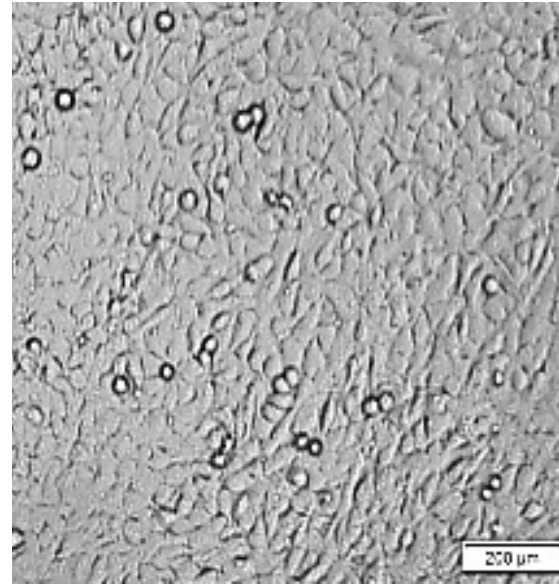

**U251-GSC/  
shNT**

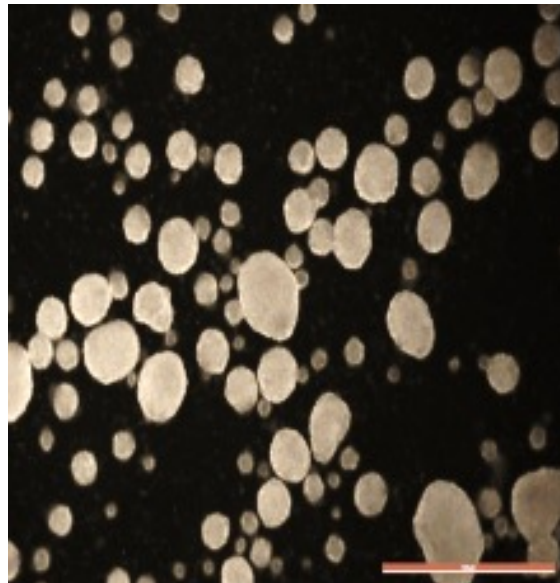

**U251-GSC/  
shFMOD**

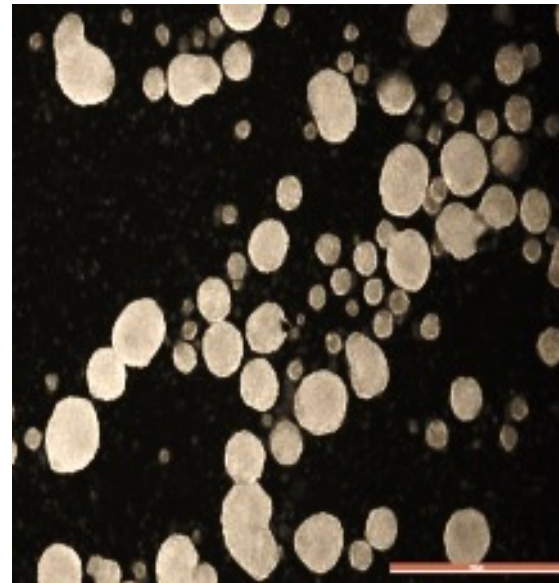

Supplement: fig2-figsupp6-data1 [file elife-78972-fig2-figsupp6-data1-v3.zip]

## Supplementary Figure 11

Gel pic

11A

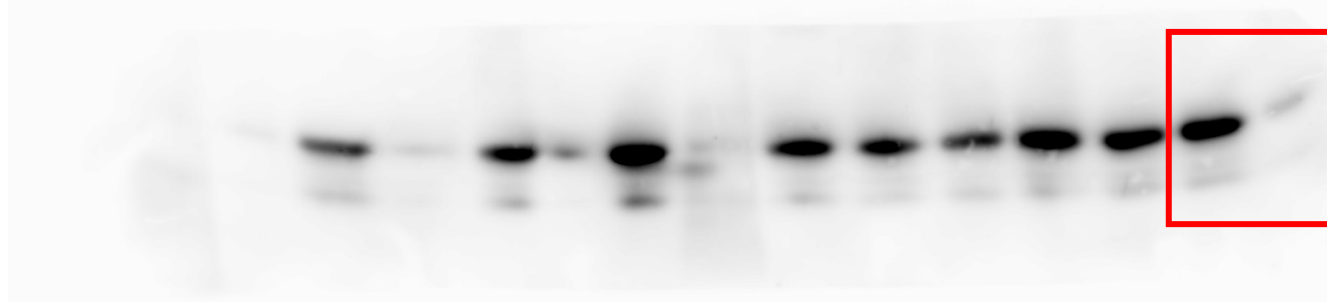

FMOD, 43 kDa

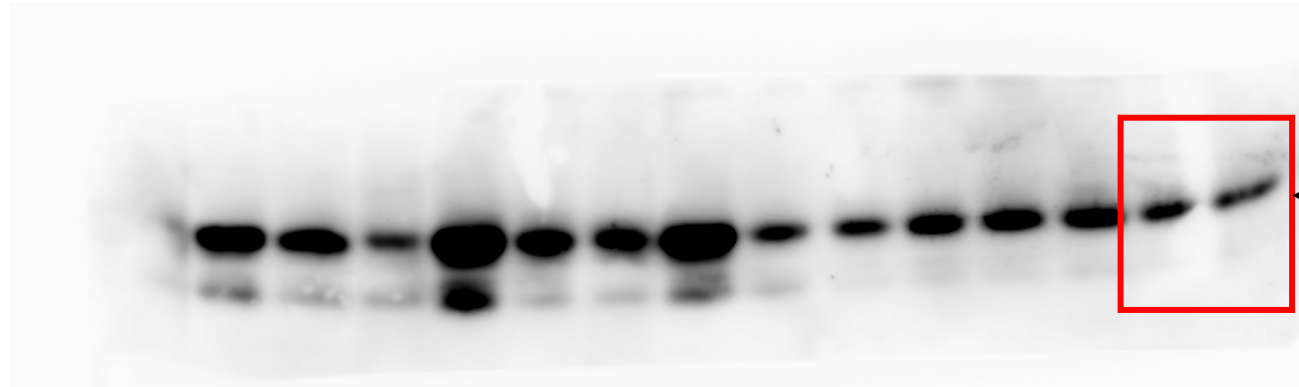

GAPDH, 36 kDa

Supplement: fig2-figsupp6-data1 [file elife-78972-fig2-figsupp6-data1-v3.zip]

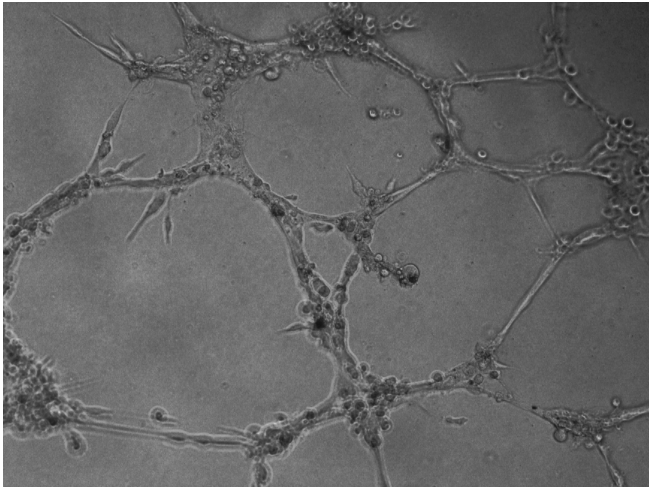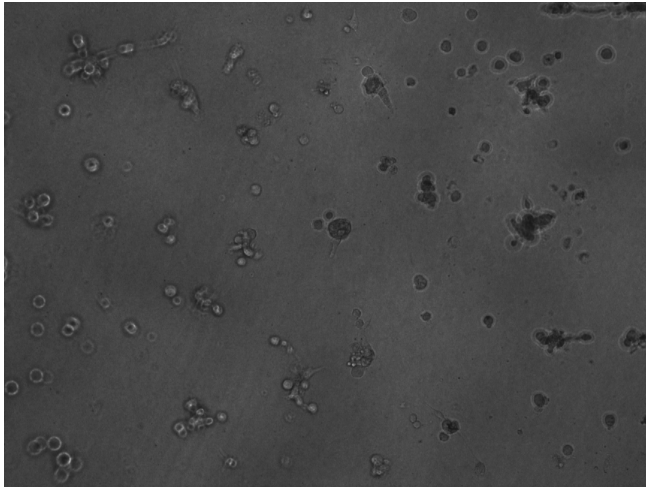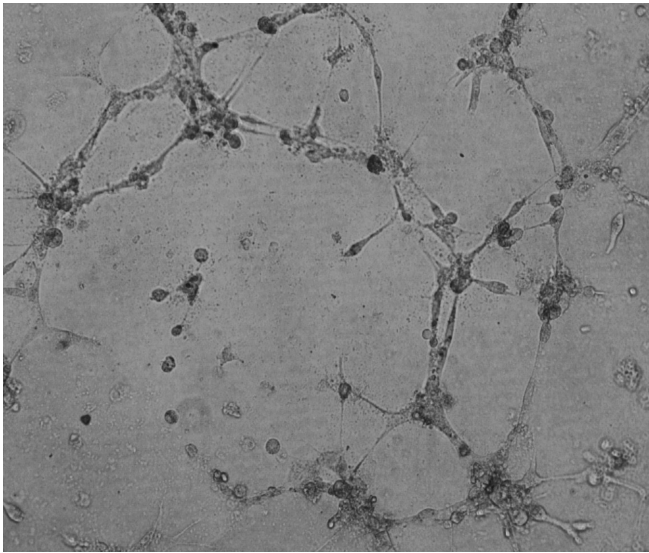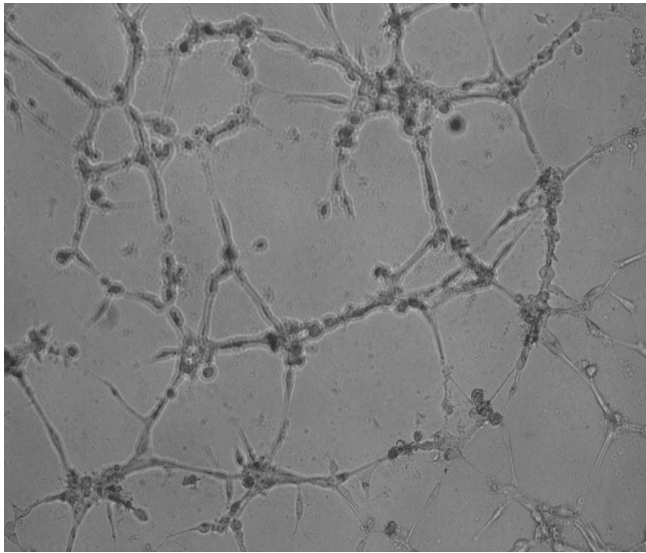

Supplement: fig3-data1 [file elife-78972-fig3-data1-v3.zip]

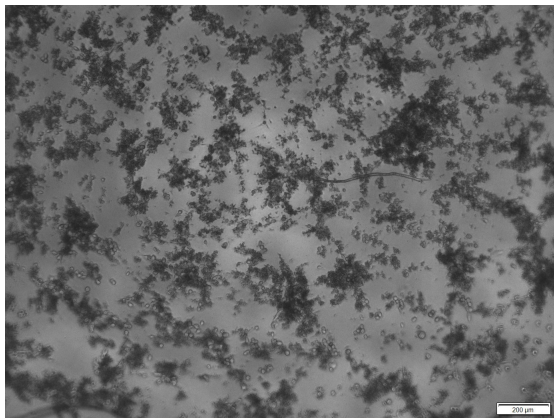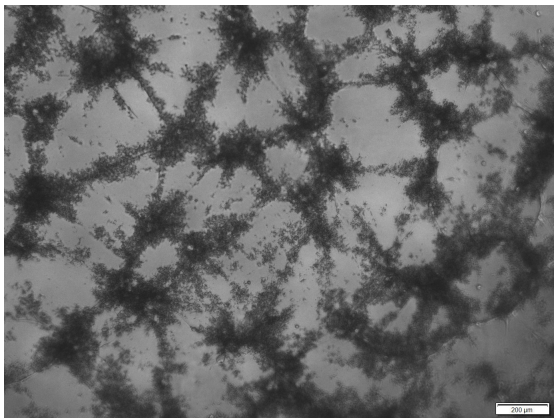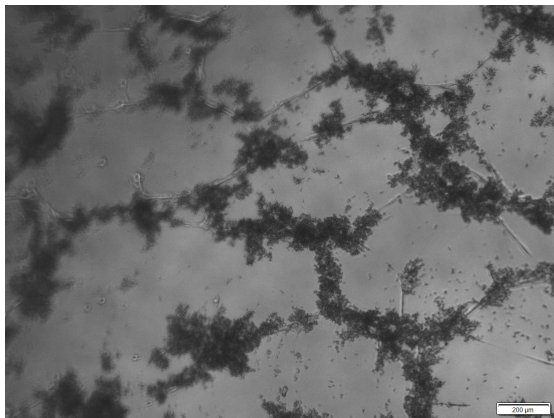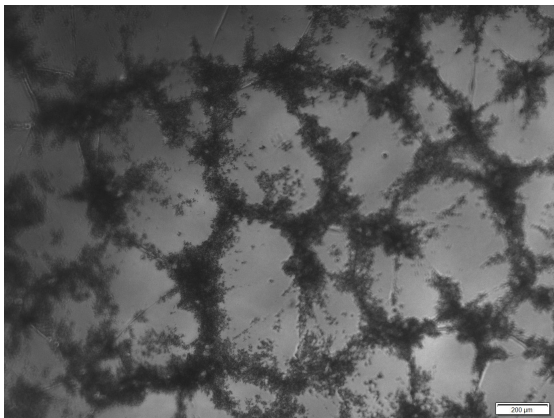

Supplement: fig3-data5 [file elife-78972-fig3-data5-v3.zip]

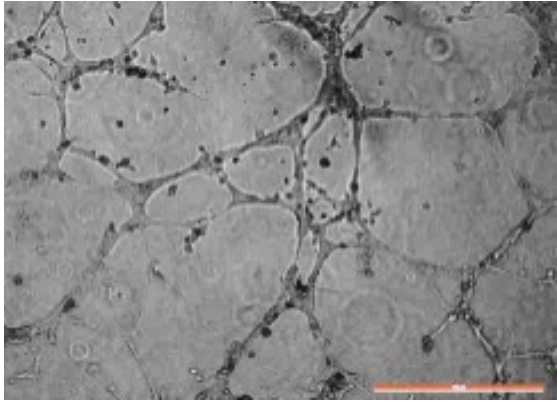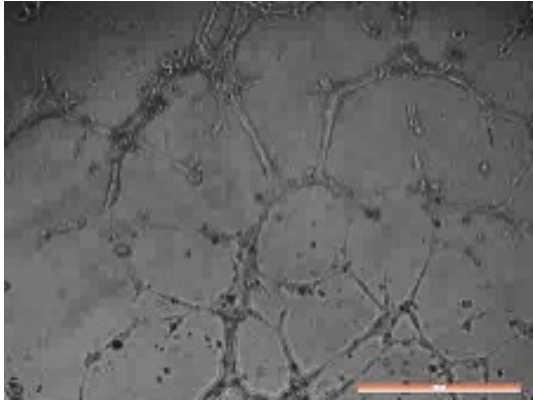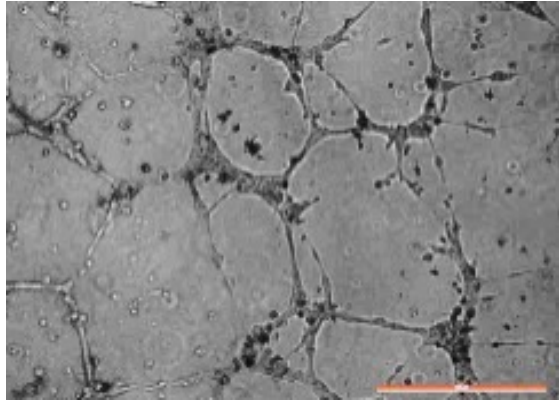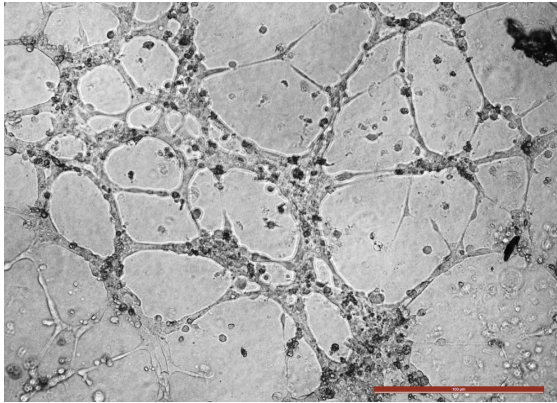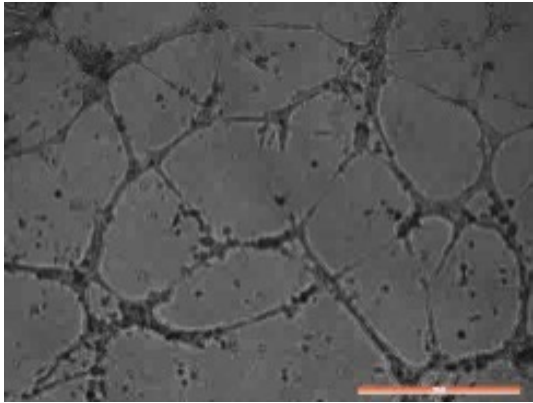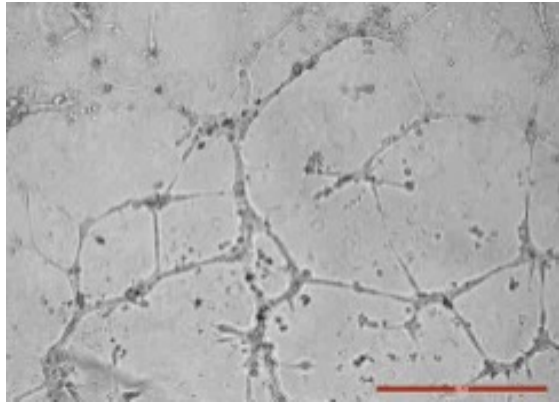

Supplement: fig3-figsupp1-data1 [file elife-78972-fig3-figsupp1-data1-v3.zip]

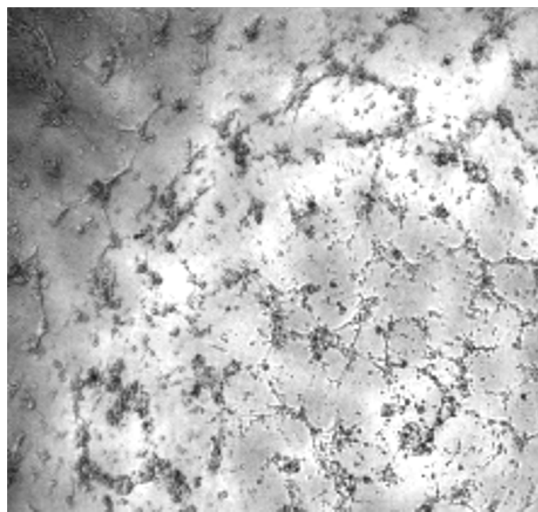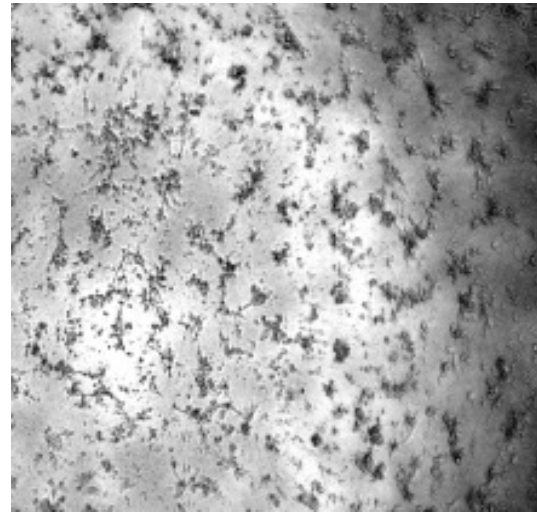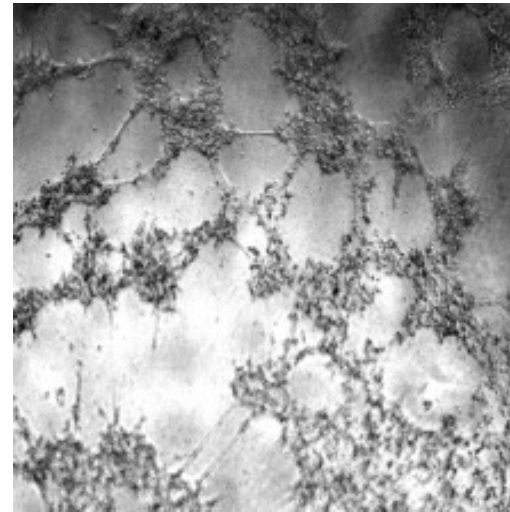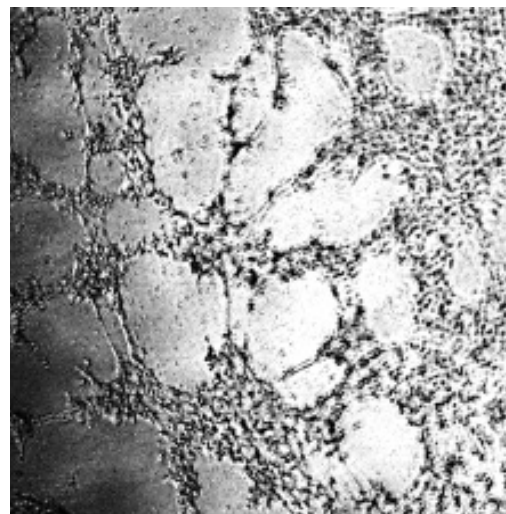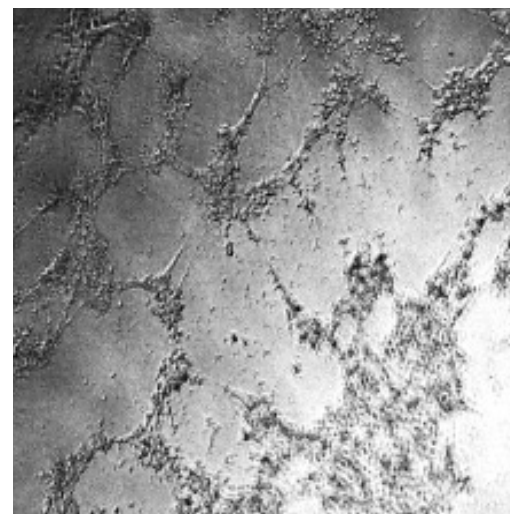

Supplement: fig3-figsupp1-data1 [file elife-78972-fig3-figsupp1-data1-v3.zip]

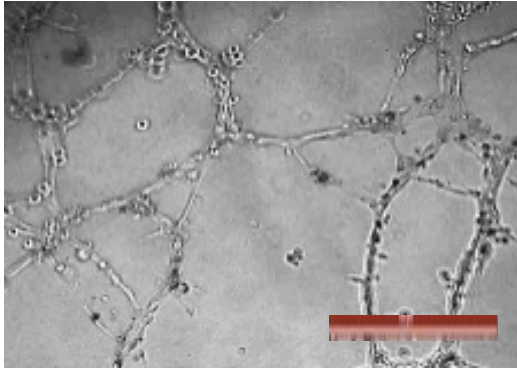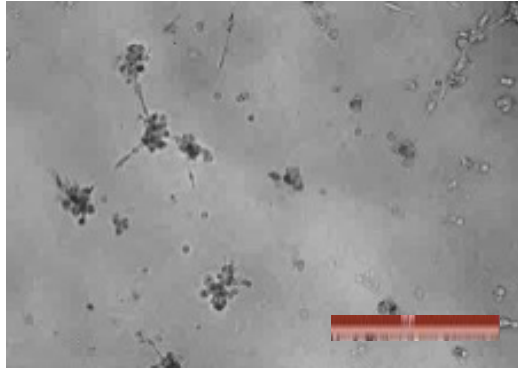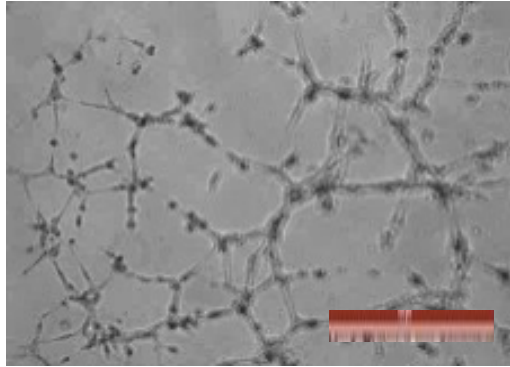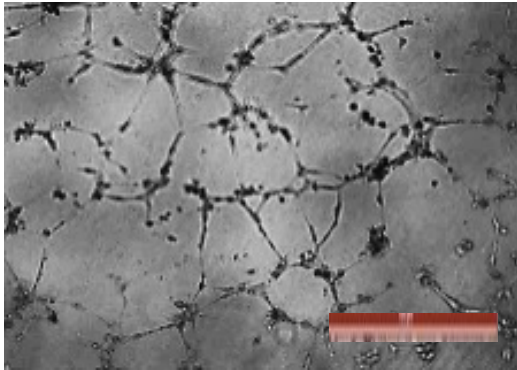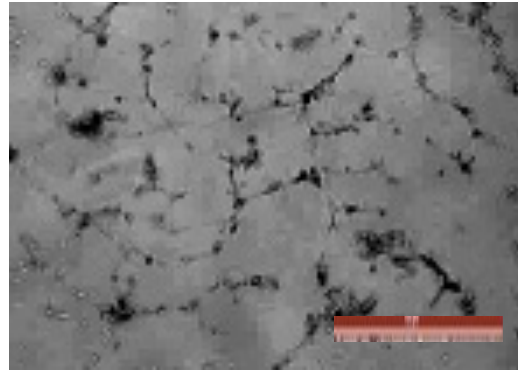

Supplement: fig3-figsupp1-data1 [file elife-78972-fig3-figsupp1-data1-v3.zip]

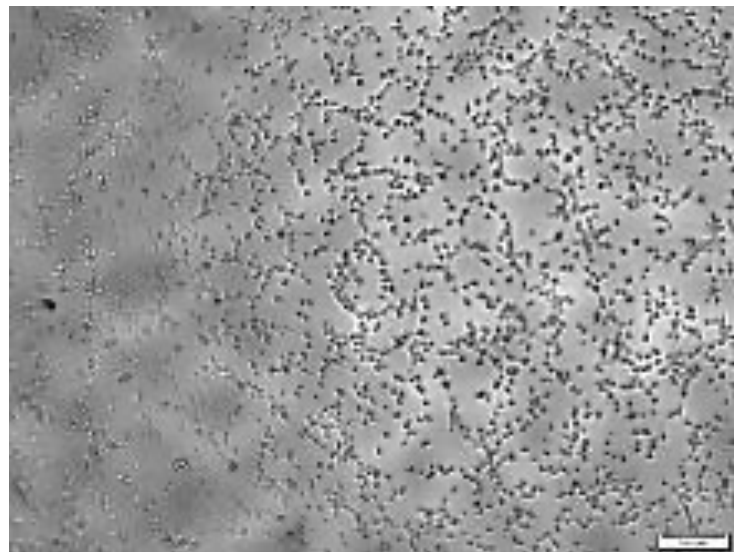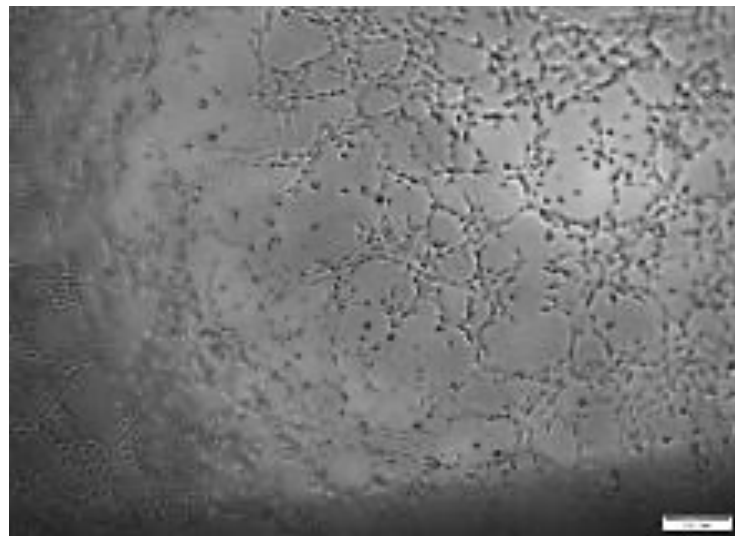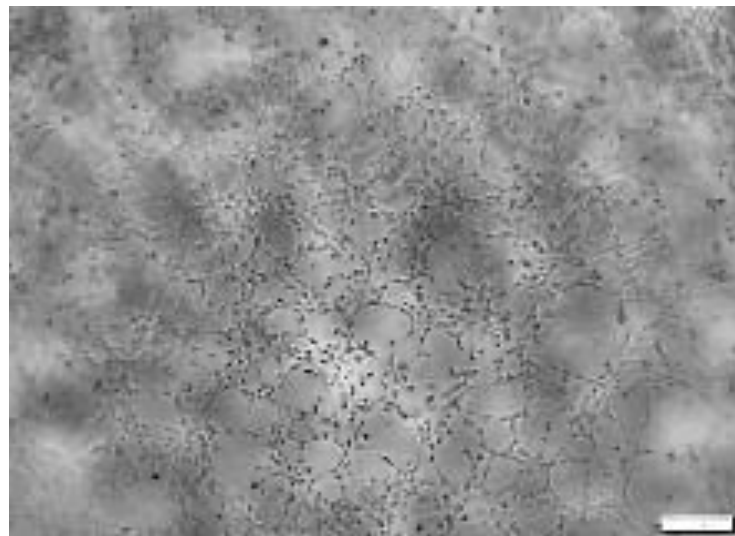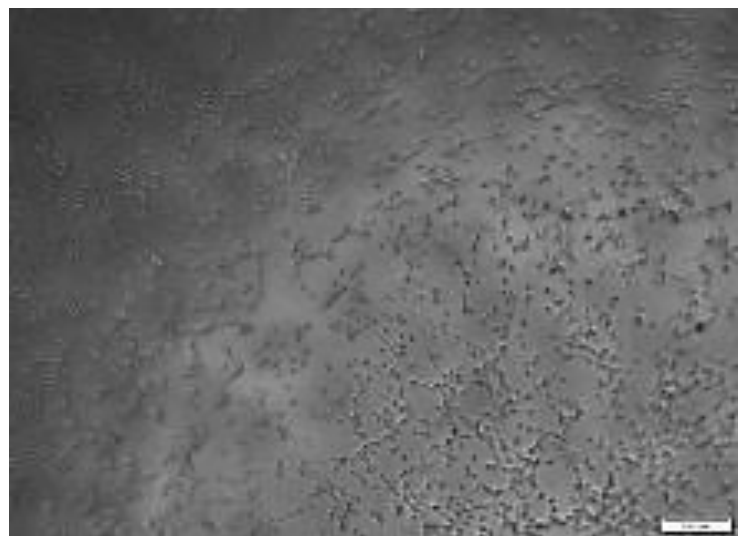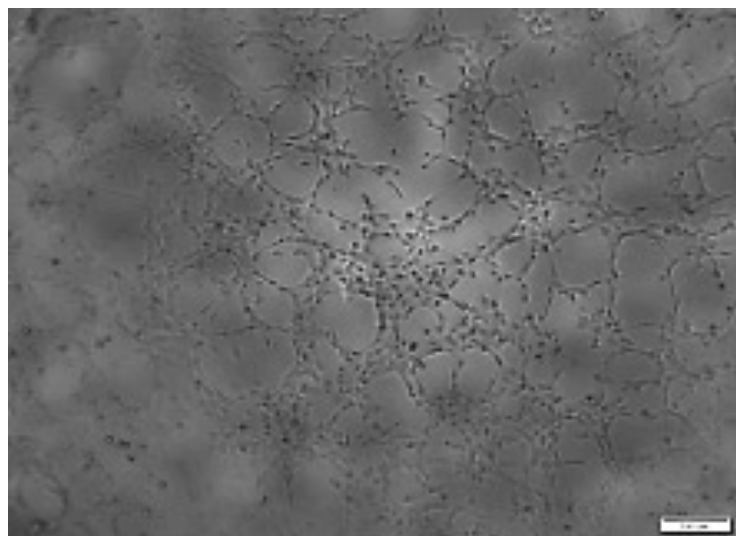

Supplement: fig3-figsupp1-data1 [file elife-78972-fig3-figsupp1-data1-v3.zip]

**A**

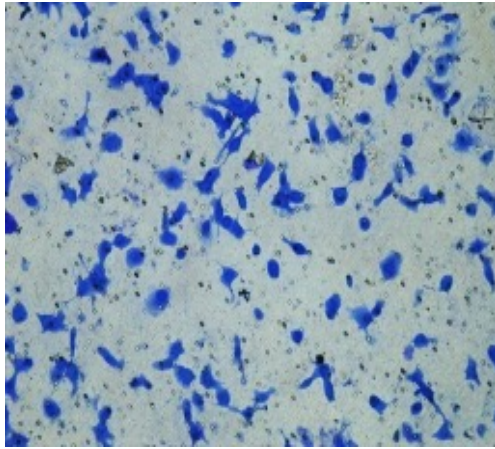

**B**

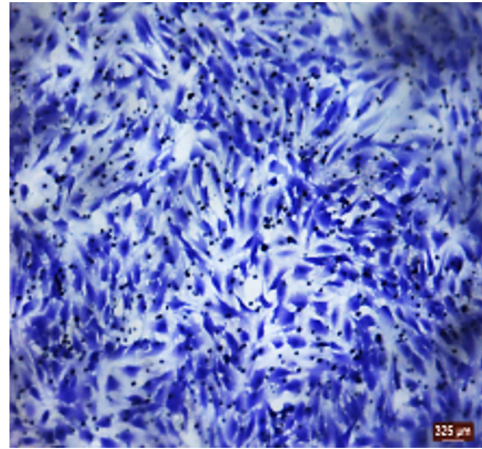

**C**

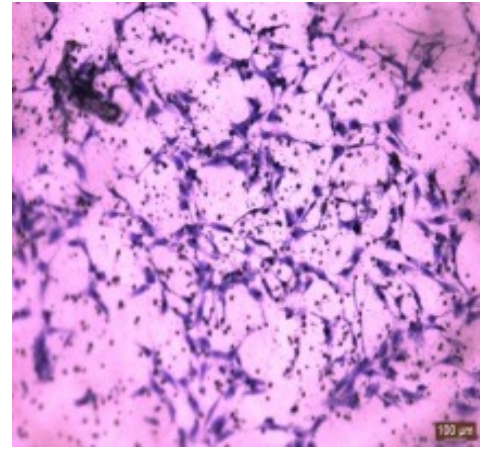

**D**

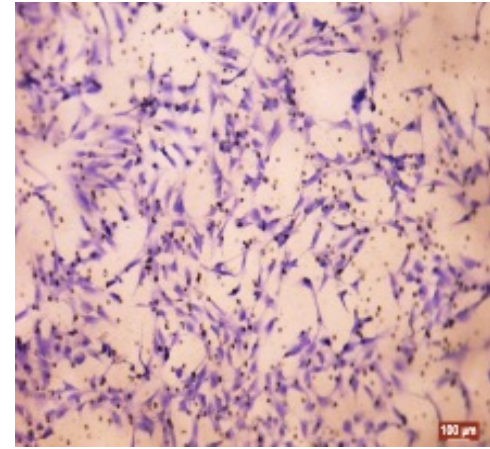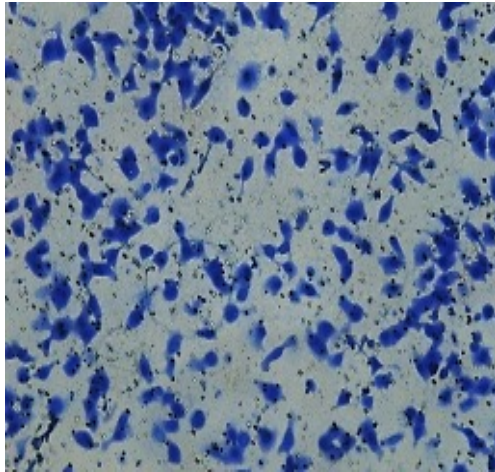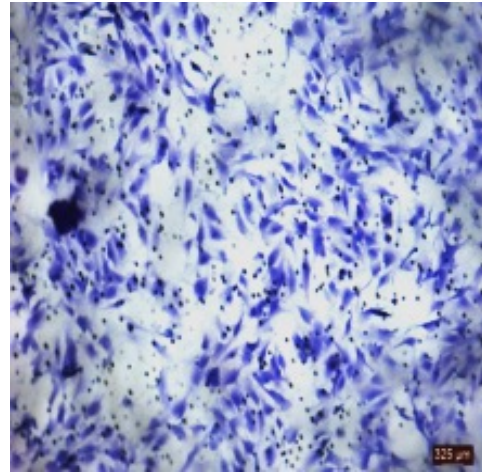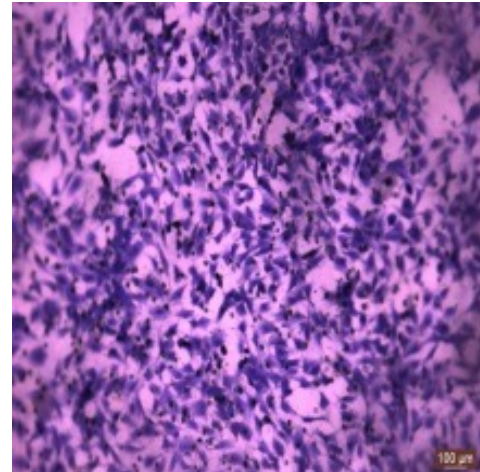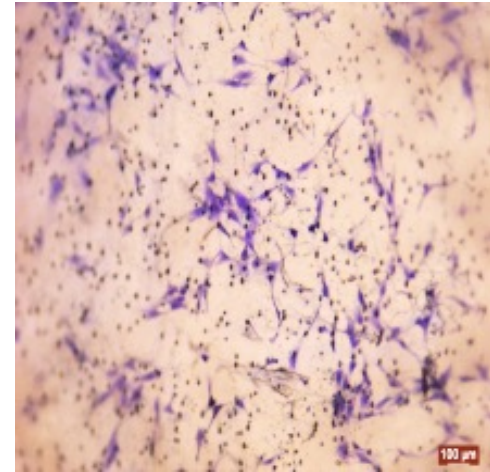

Supplement: fig3-figsupp2-data1 [file IMAGES FOR PANELS A,B,C,D.pdf › Figure 3-Figure Supplement 2 Source Data/Figure 3-figure supplement 2-Source Data A,B,C,D/IMAGES FOR PANELS A,B,C,D.pdf]

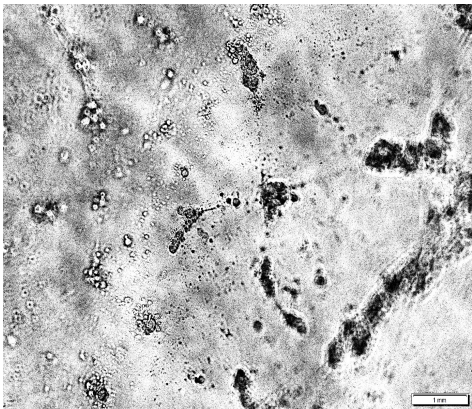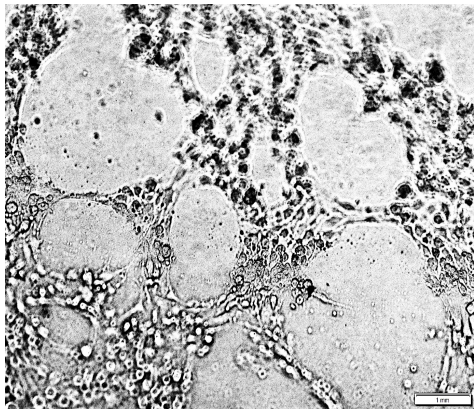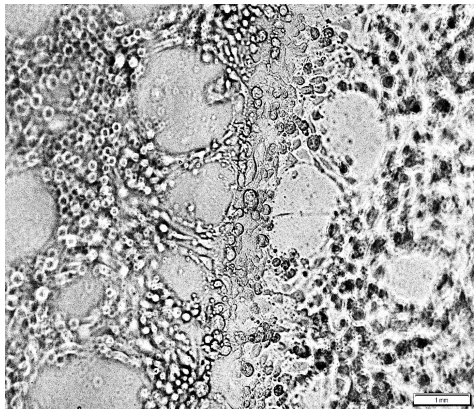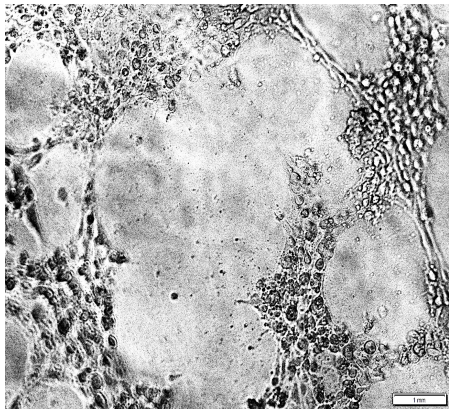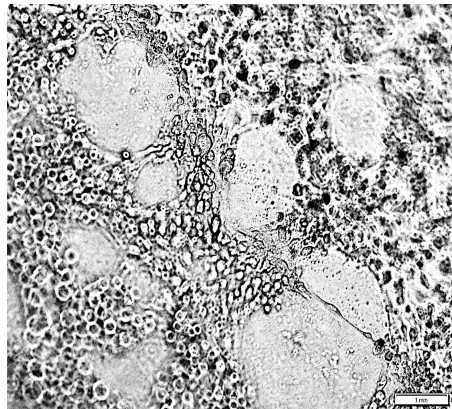

Supplement: fig3-figsupp2-data1 [file IMAGES FOR PANEL F.pdf › Figure 3-Figure Supplement 2 Source Data/Figure 3-figure supplement 2-Source Data F/IMAGES FOR PANEL F.pdf]

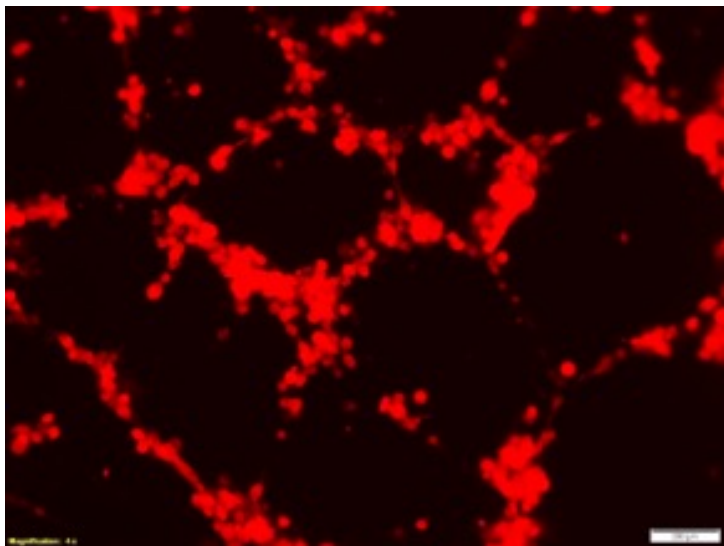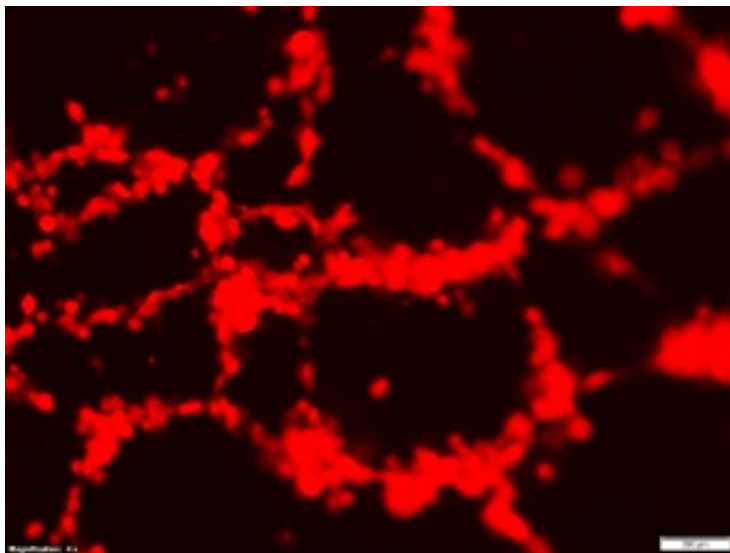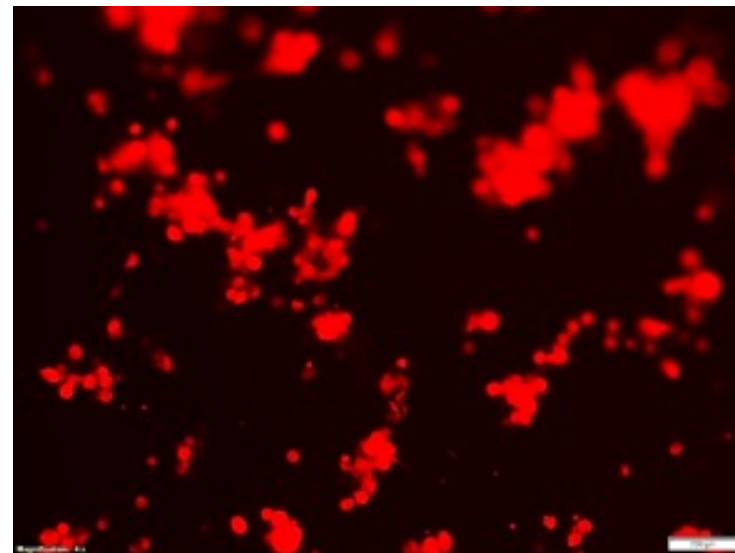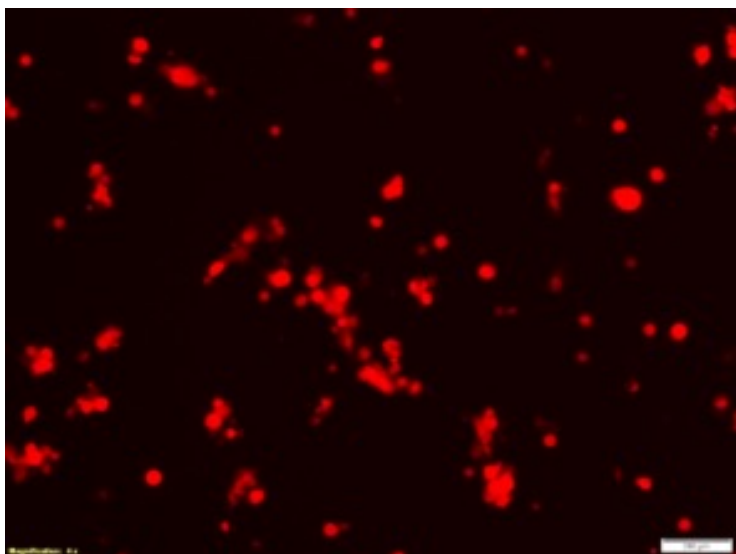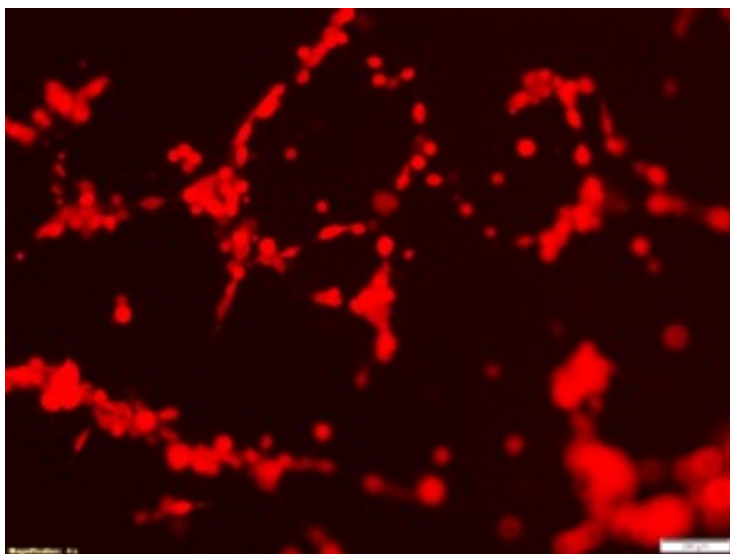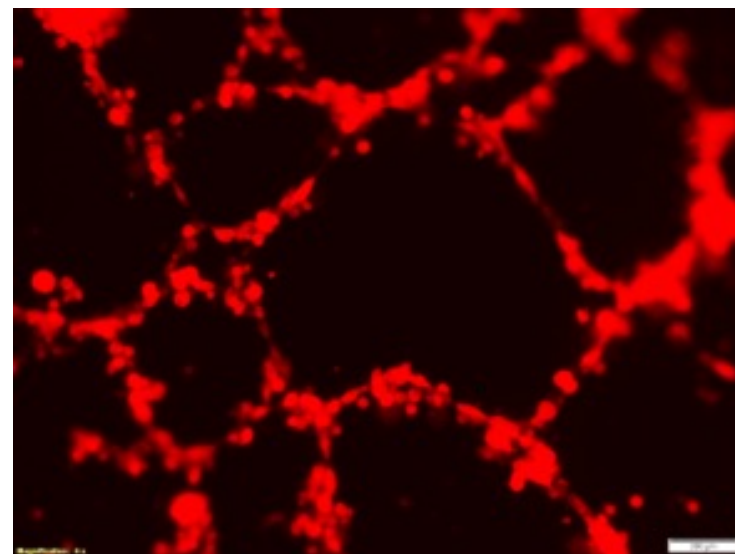

Supplement: fig3-figsupp3-data1 [file elife-78972-fig3-figsupp3-data1-v3.zip]

**B**

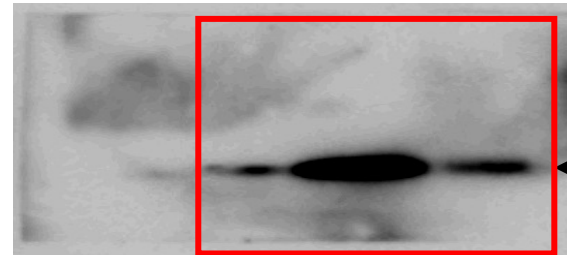

**FMOD, 43 kDa**

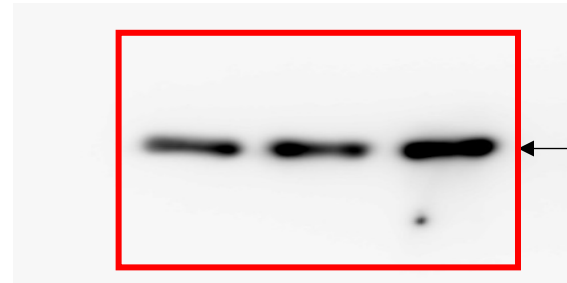

**GAPDH, 36 kDa**

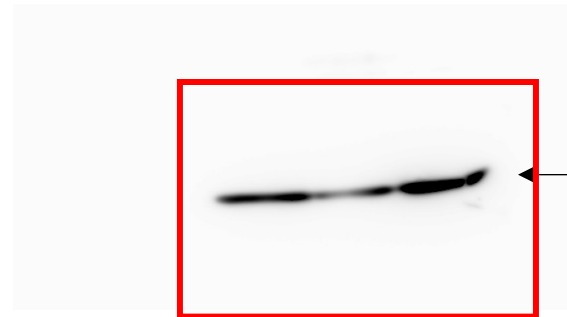

**CD31, 135 kDa**

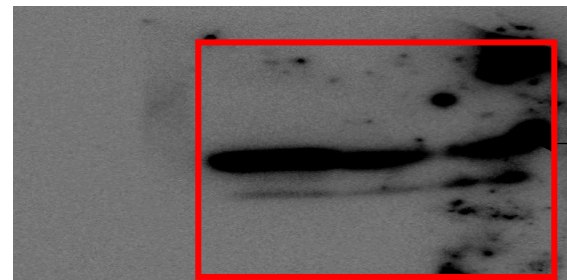

**GAPDH, 36 kDa**

Supplement: fig3-figsupp3-data1 [file elife-78972-fig3-figsupp3-data1-v3.zip]

**Figure 4**

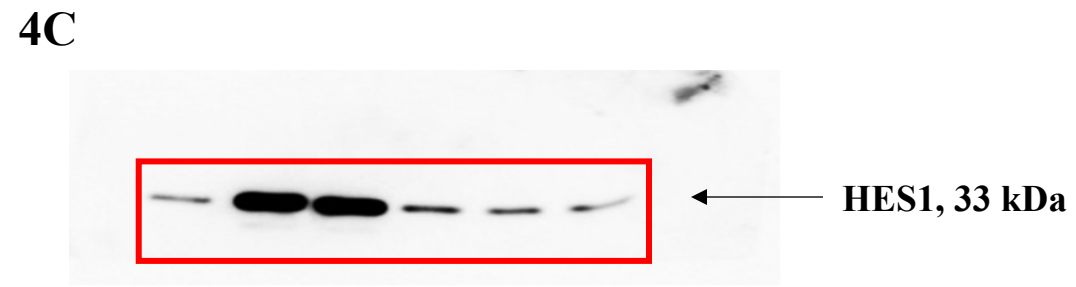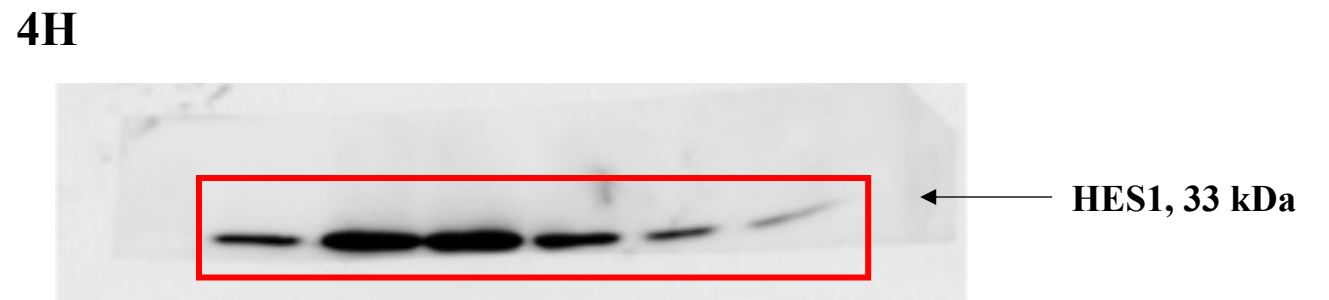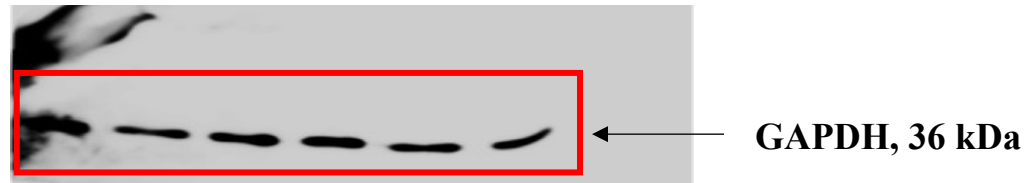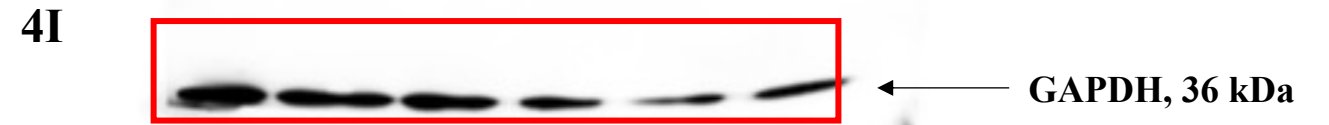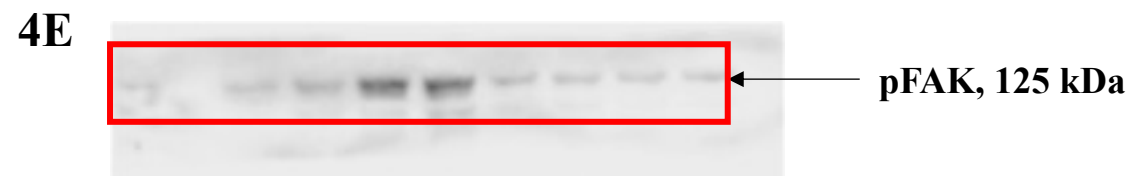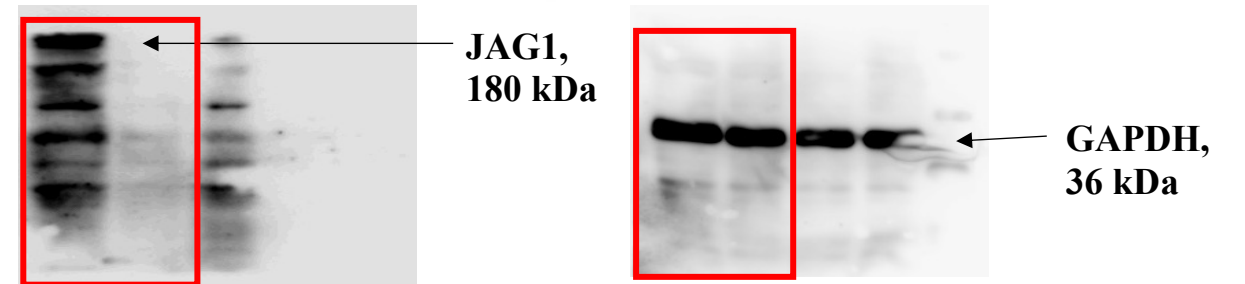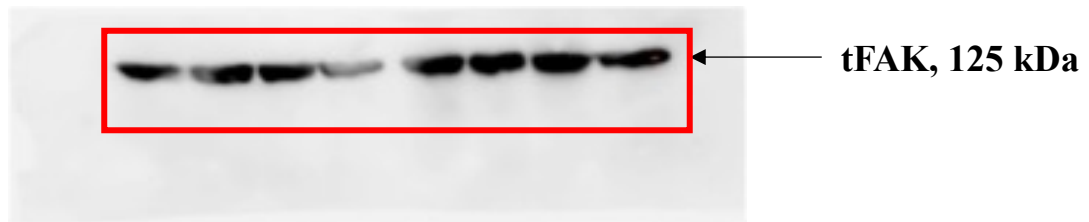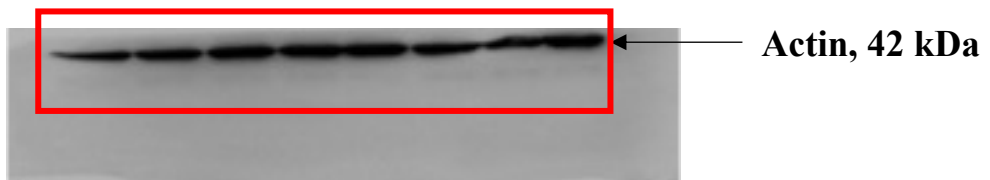

Supplement: fig4-data3 [file elife-78972-fig4-data3-v3.zip]

**Figure 4**

**4K**

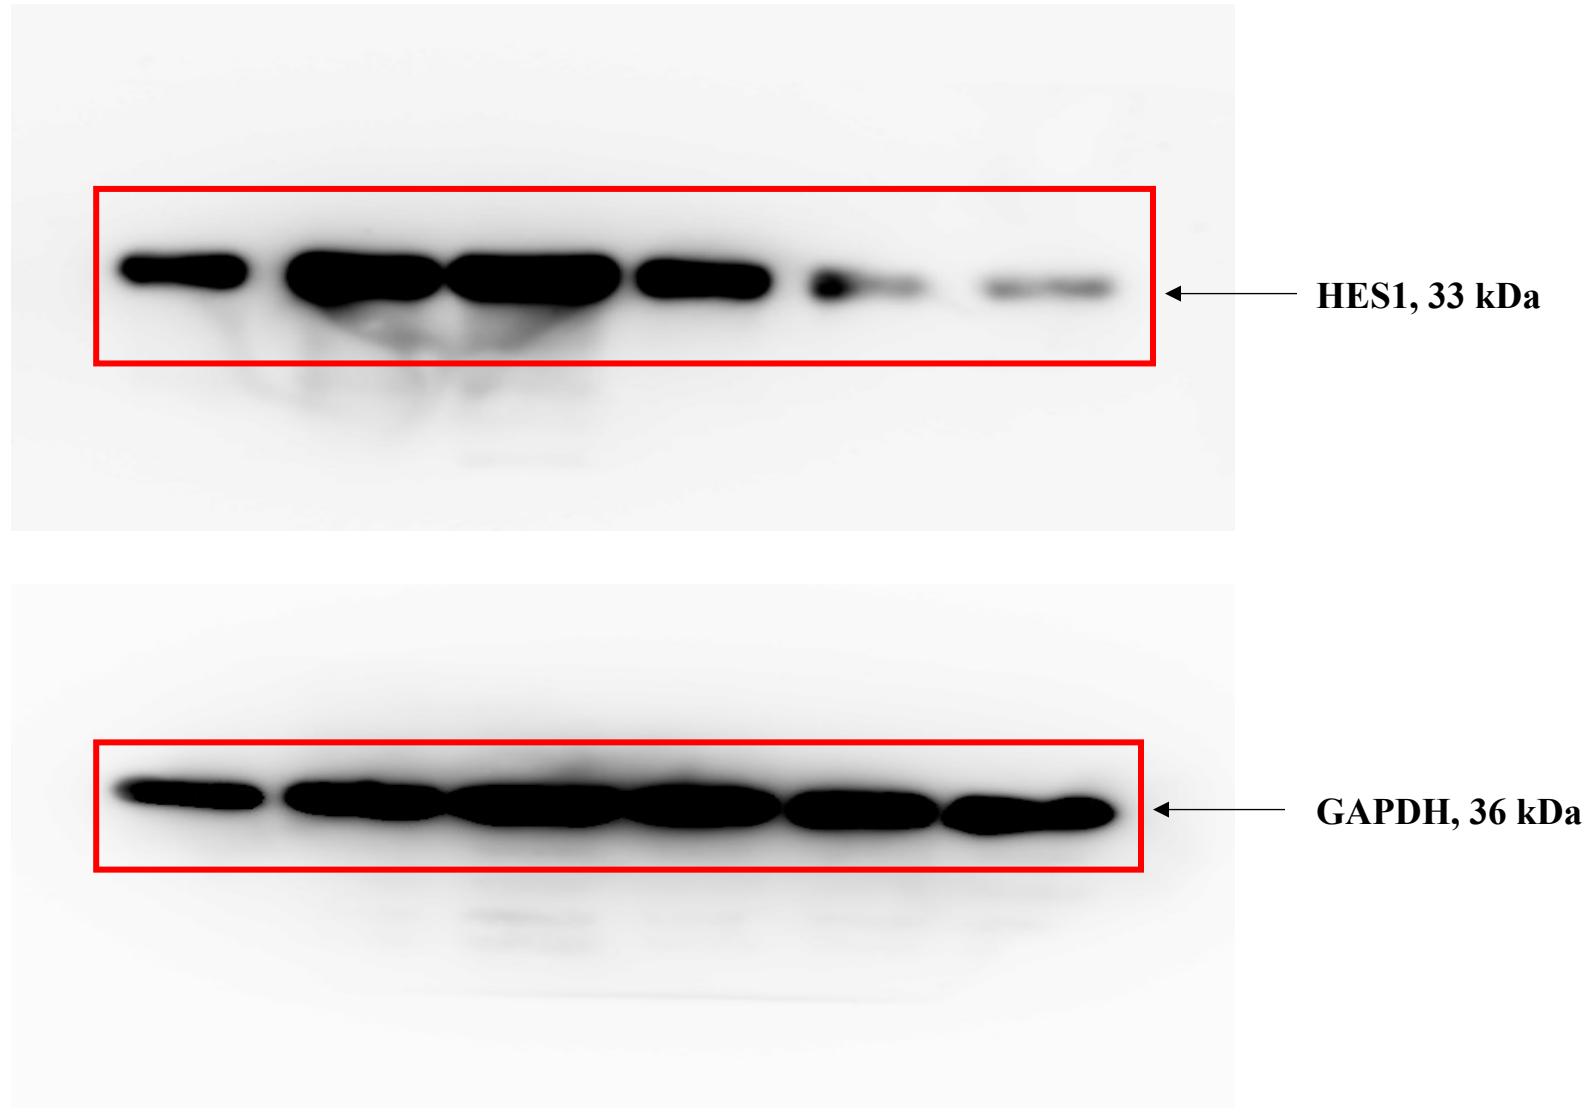

Supplement: fig4-data8 [file BLOTS FOR PANEL K.pdf › Figure 4-Source data K/BLOTS FOR PANEL K.pdf]

**Supplementary Figure 16**

**16 C**

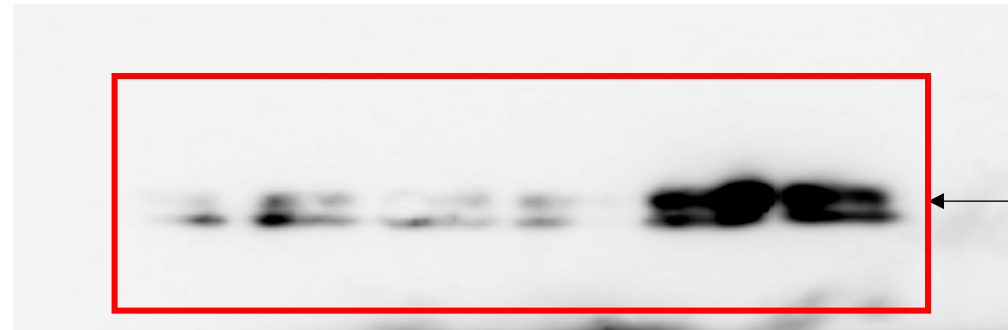

**NICD, 110kDa**

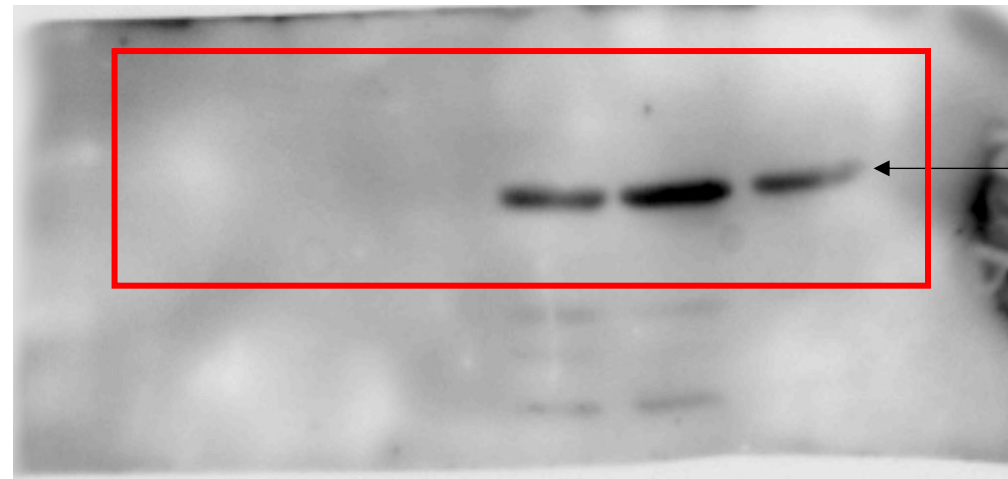

**H3, 17 kDa**

**GAPDH, 36 kDa**

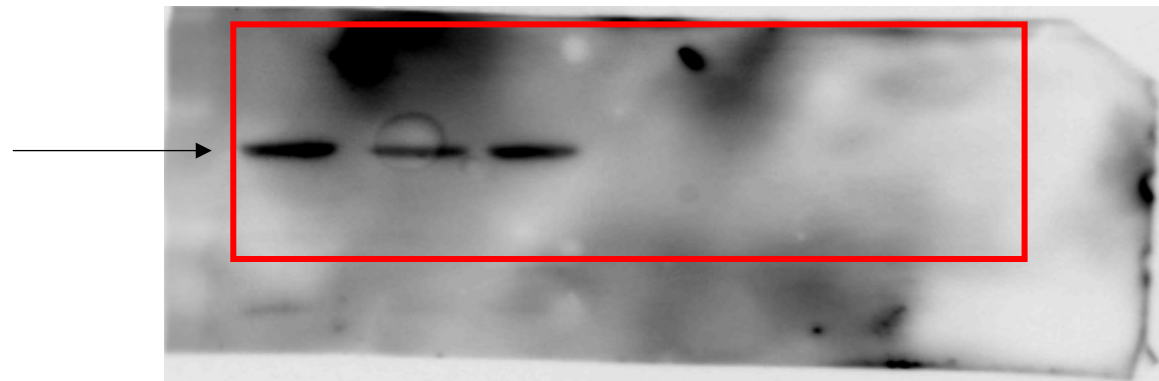

Supplement: fig4-figsupp1-data1 [file elife-78972-fig4-figsupp1-data1-v3.zip]

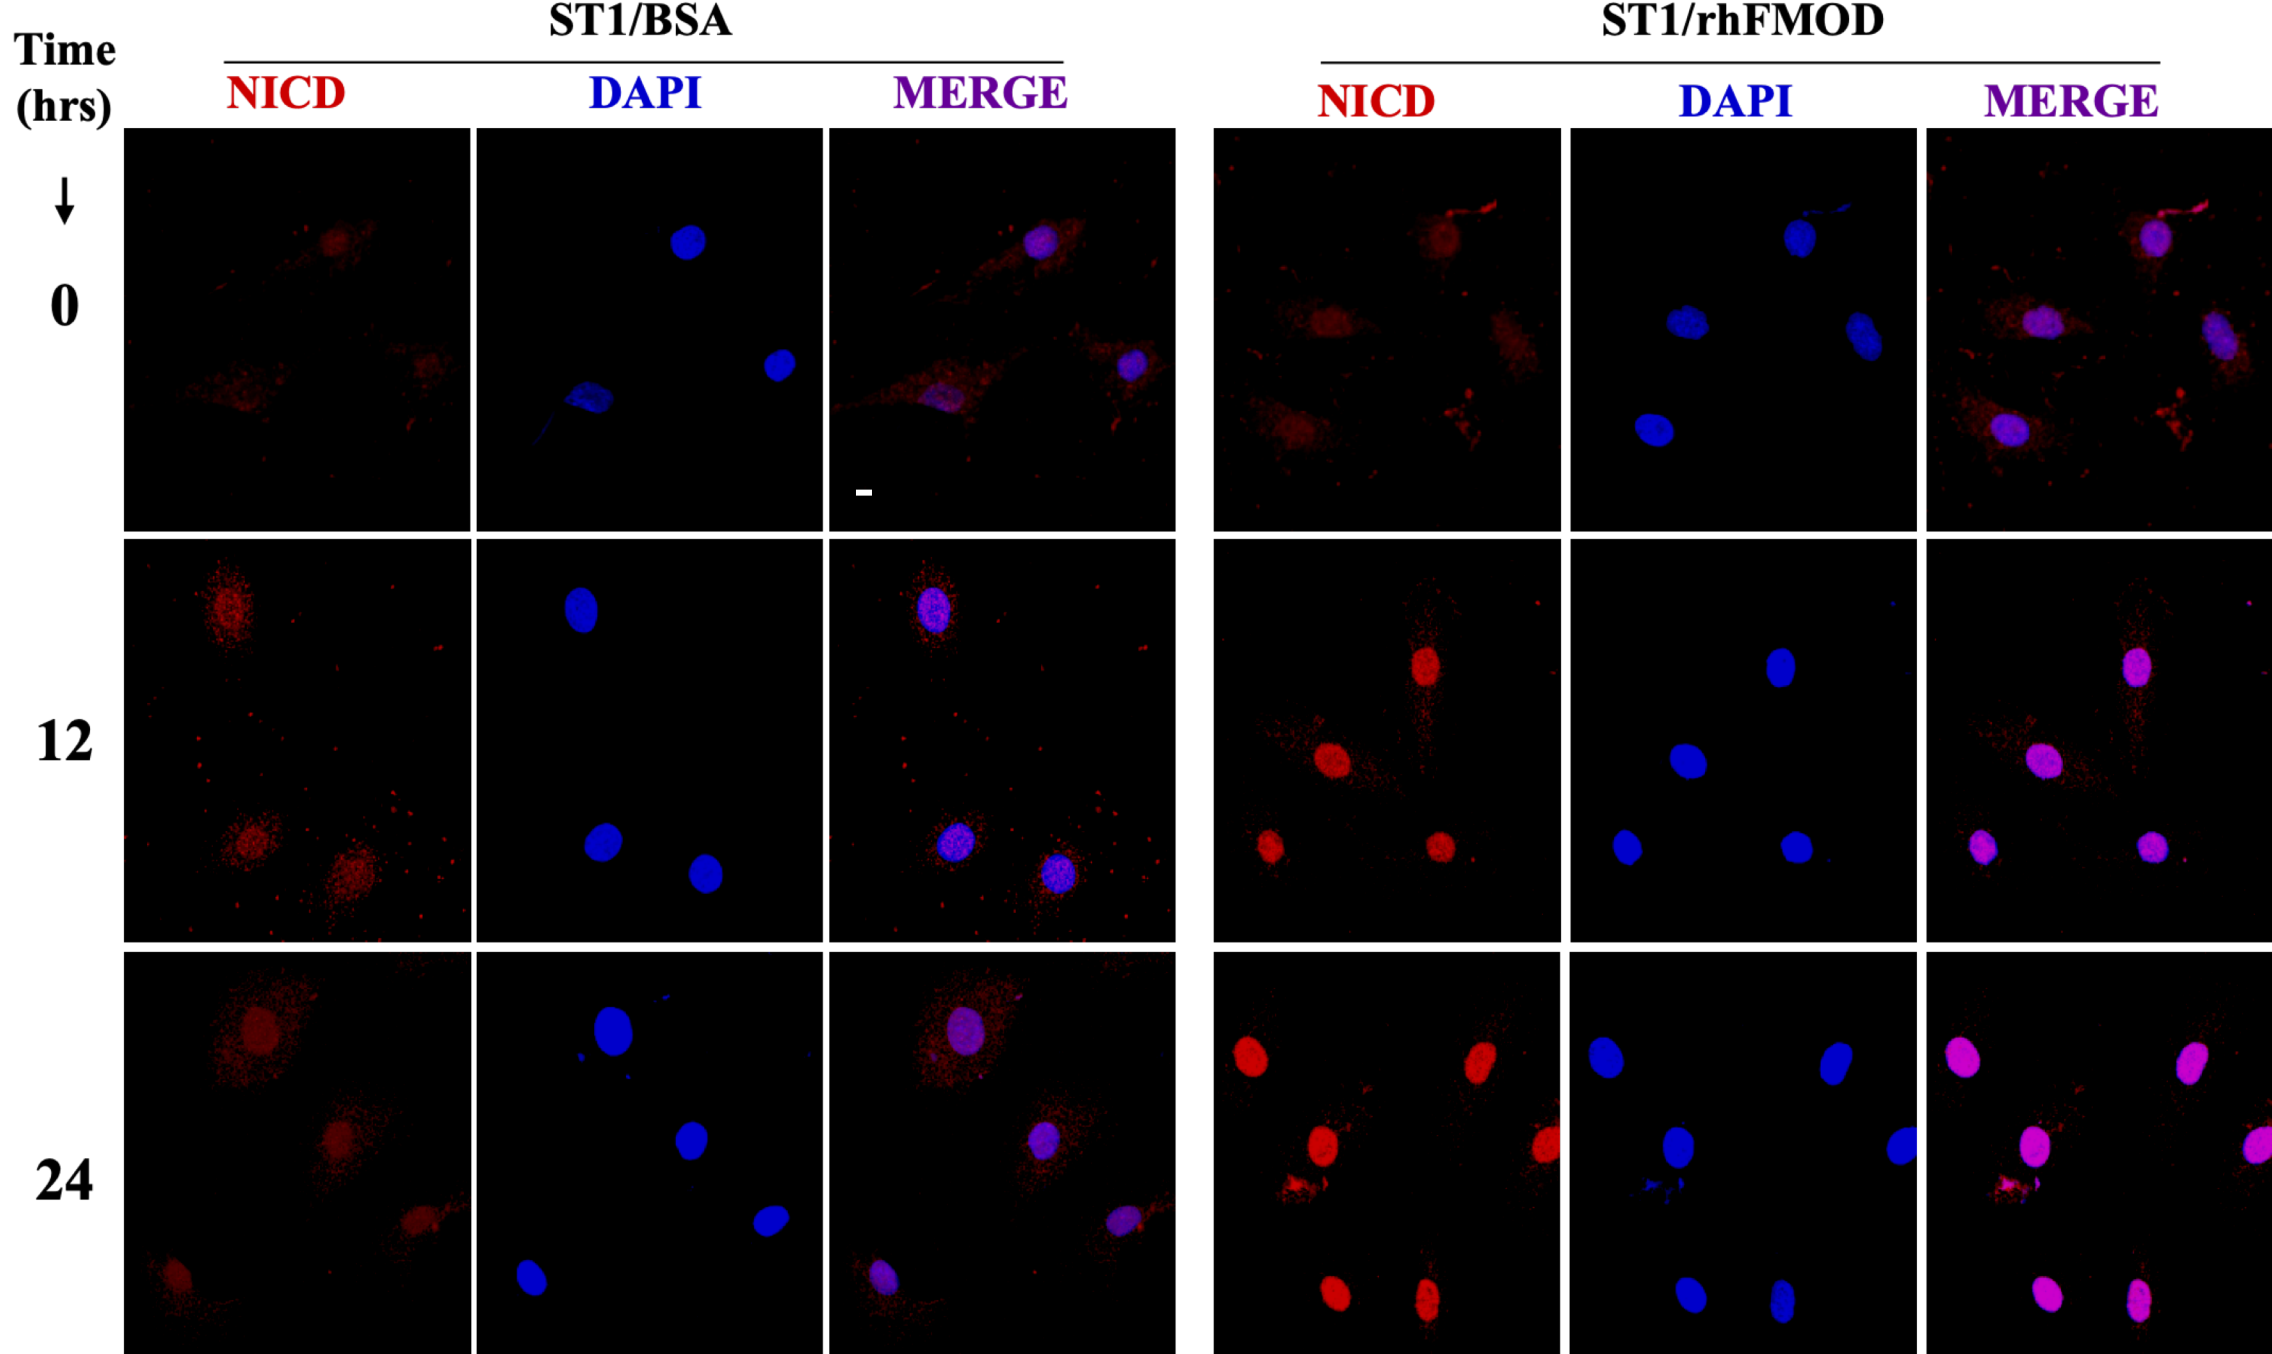

Supplement: fig4-figsupp1-data1 [file elife-78972-fig4-figsupp1-data1-v3.zip]

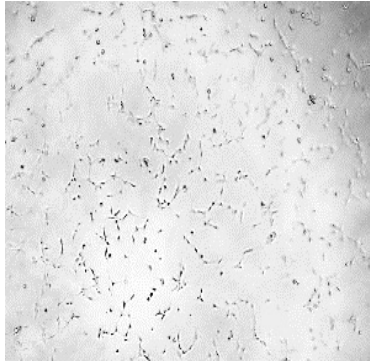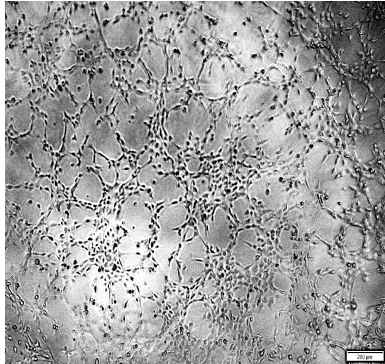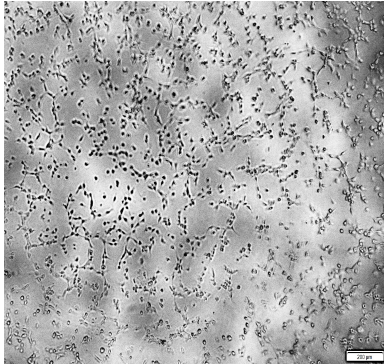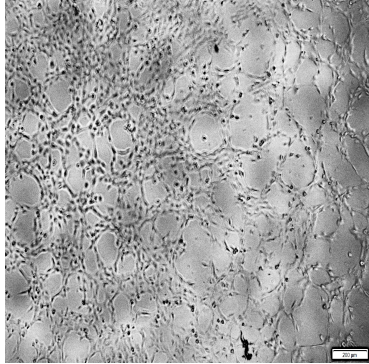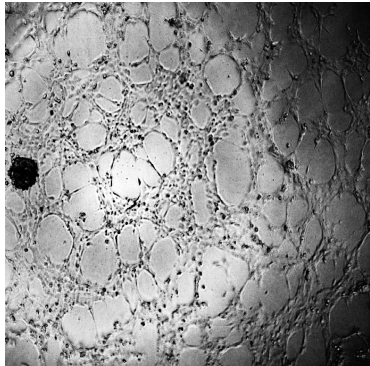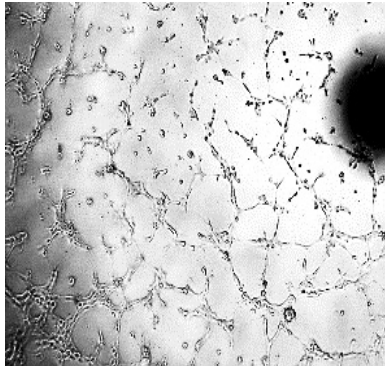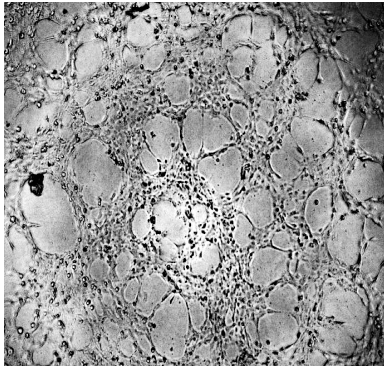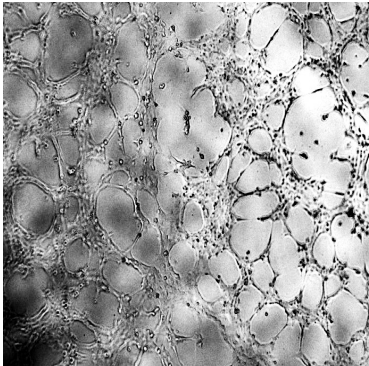

Supplement: fig4-figsupp2-data1 [file elife-78972-fig4-figsupp2-data1-v3.zip]

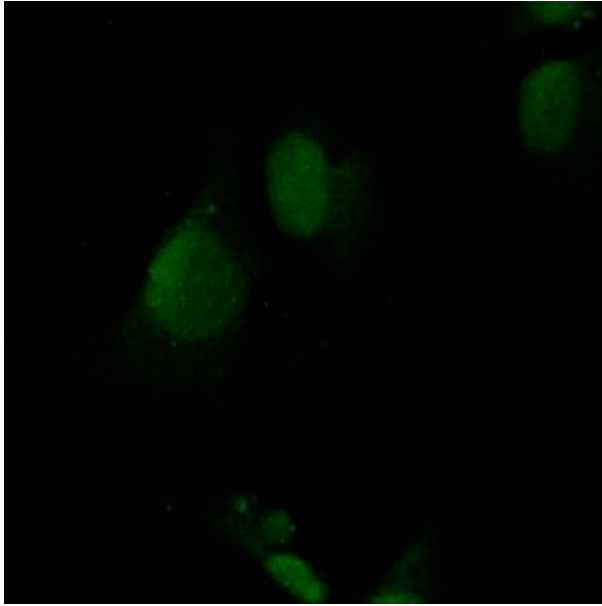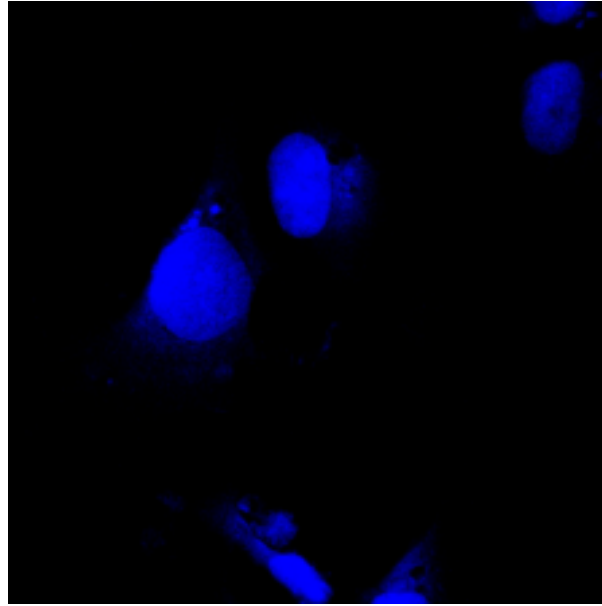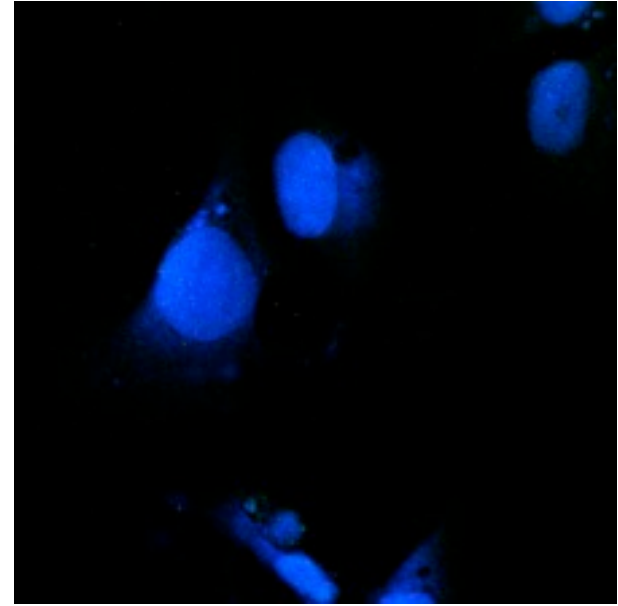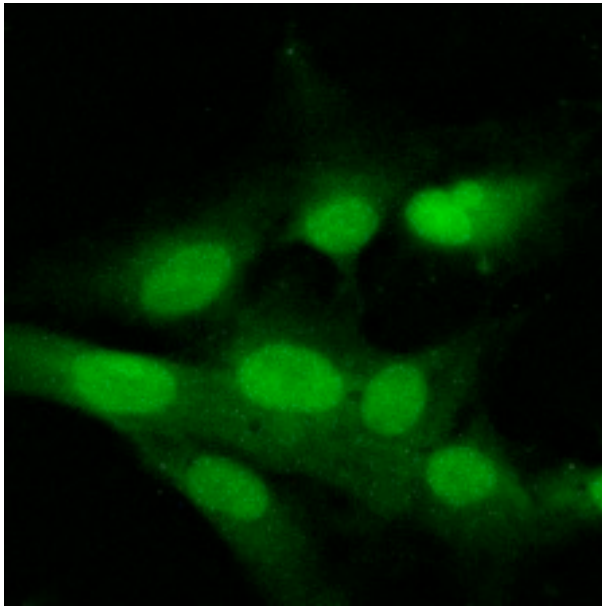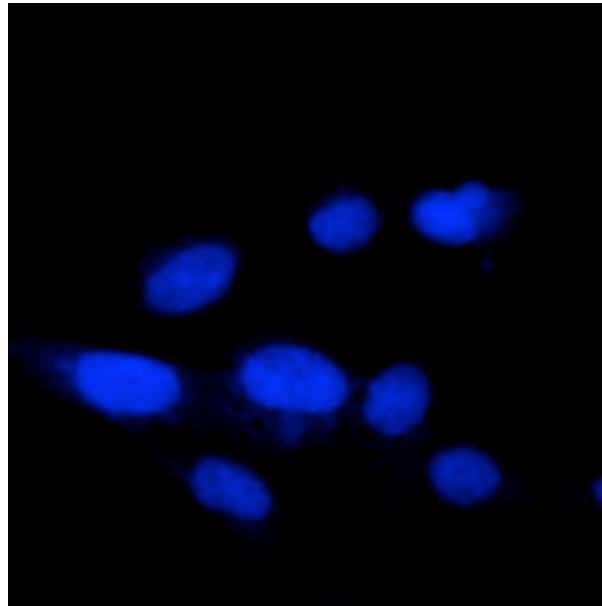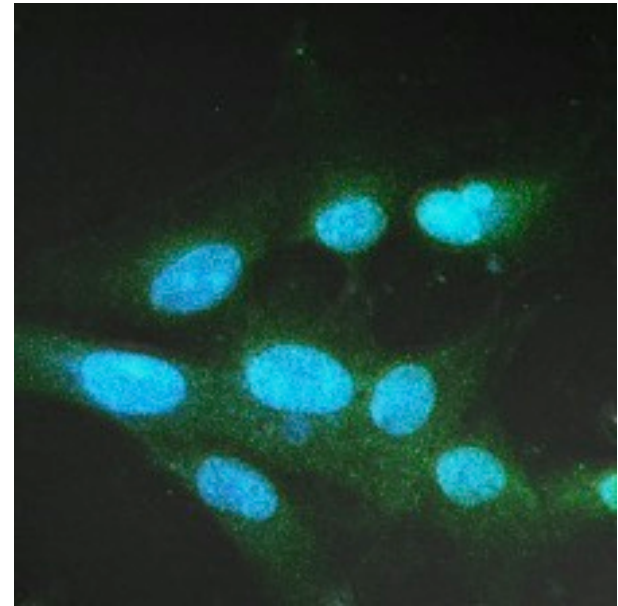

Supplement: fig4-figsupp2-data1 [file elife-78972-fig4-figsupp2-data1-v3.zip]

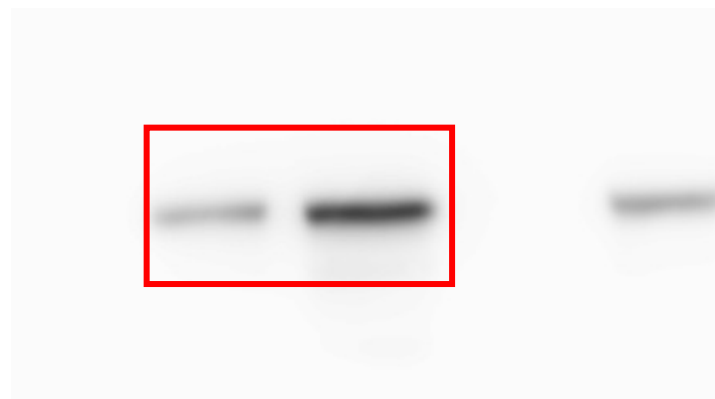

← **NICD, 110 kDa**

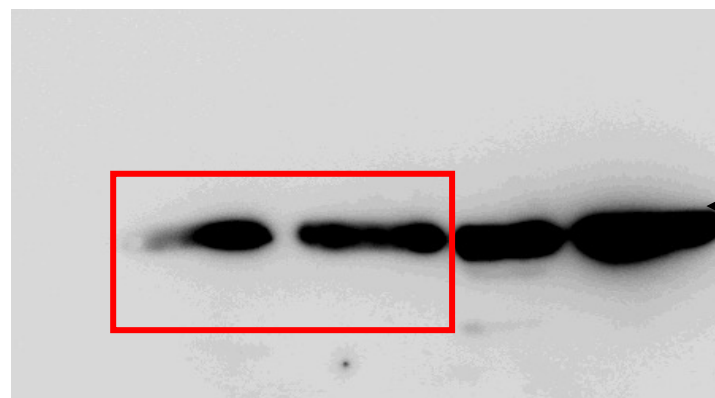

← **GAPDH, 36 kDa**

Supplement: fig4-figsupp2-data1 [file elife-78972-fig4-figsupp2-data1-v3.zip]

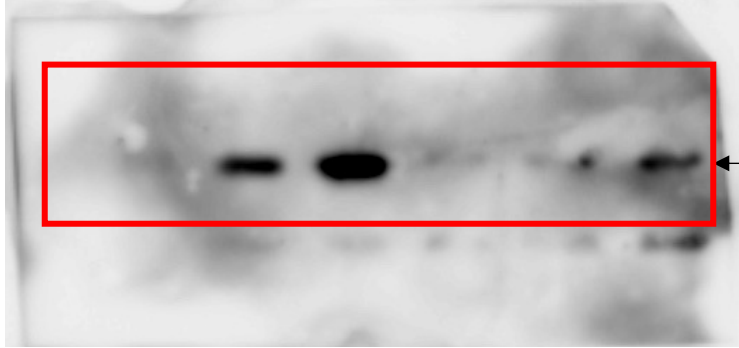

← **HES1, 33 kDa**

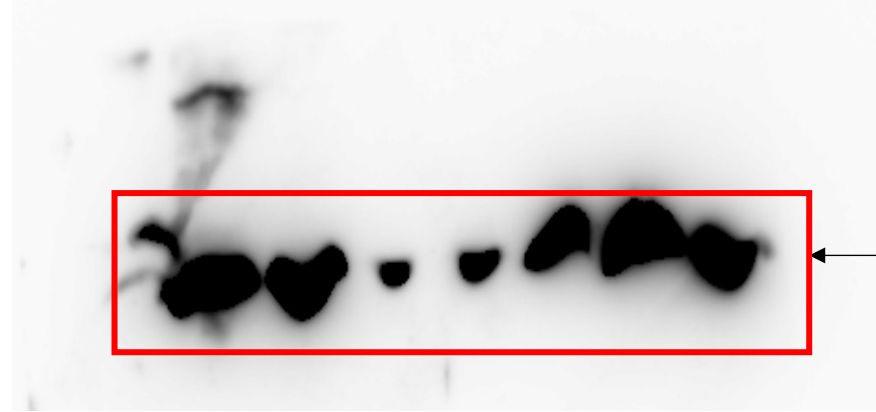

← **HES1, 33 kDa**

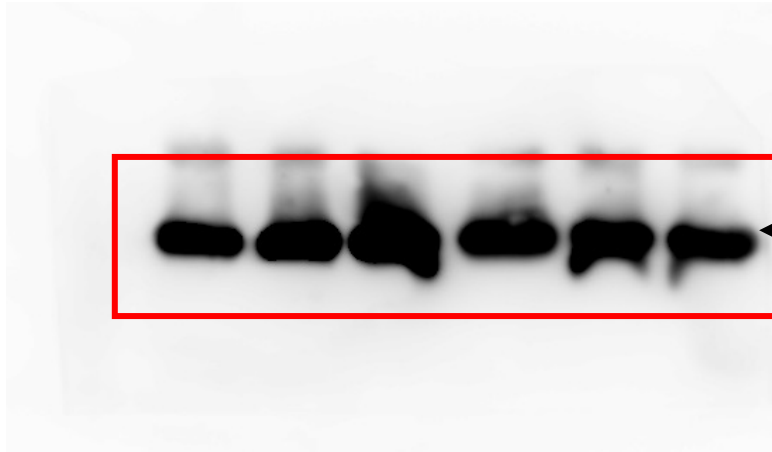

← **GAPDH,  
36 kDa**

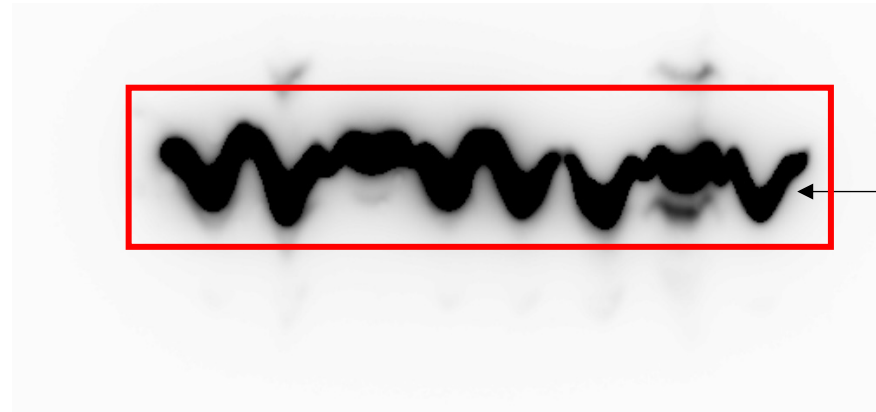

← **GAPDH, 36 kDa**

Supplement: fig4-figsupp4-data1 [file elife-78972-fig4-figsupp4-data1-v3.zip]



← **HES1, 33 kDa**



← **HES1, 33 kDa**



← **GAPDH,  
36 kDa**



← **GAPDH, 36 kDa**

Supplement: fig4-figsupp4-data1 [file elife-78972-fig4-figsupp4-data1-v3.zip]

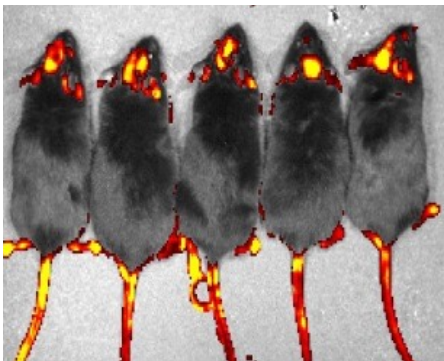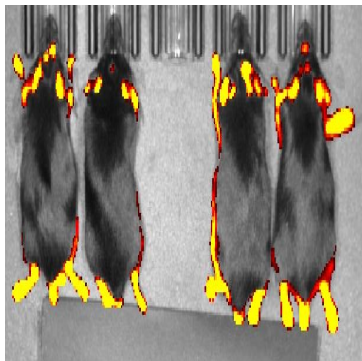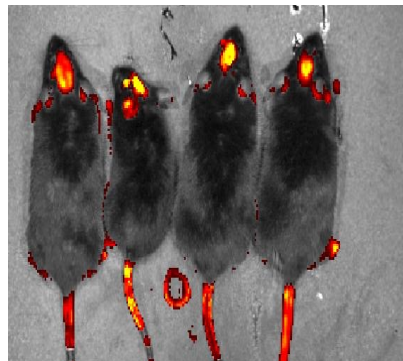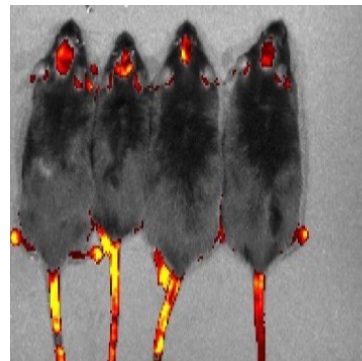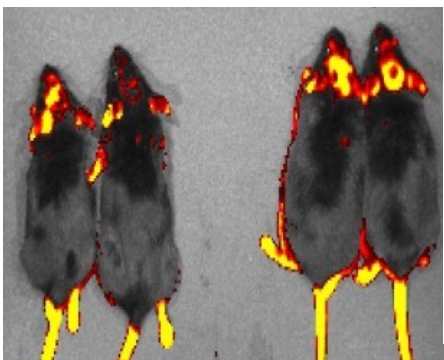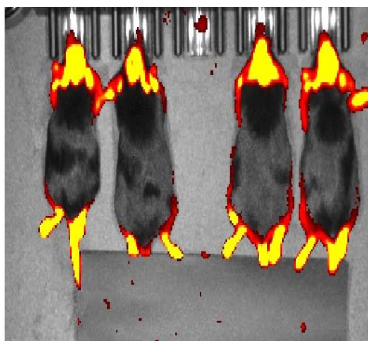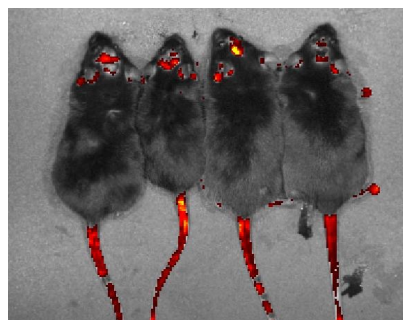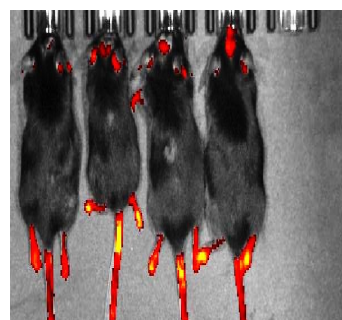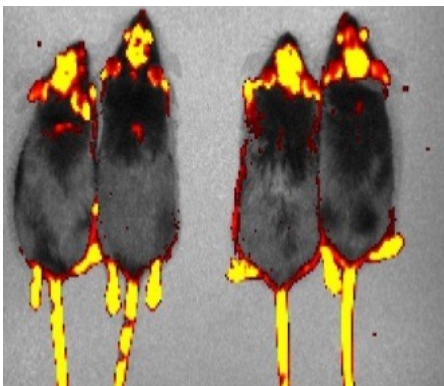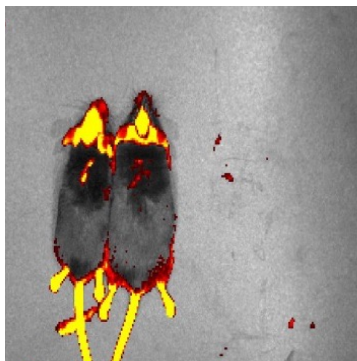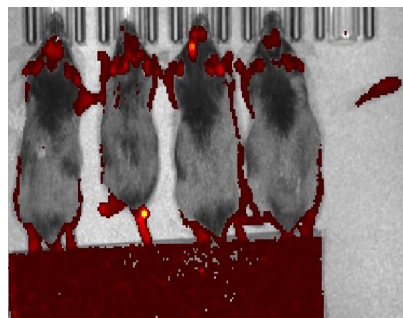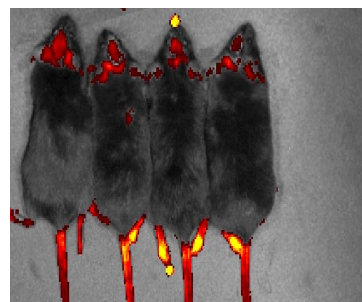

Supplement: fig5-data1 [file elife-78972-fig5-data1-v3.zip]

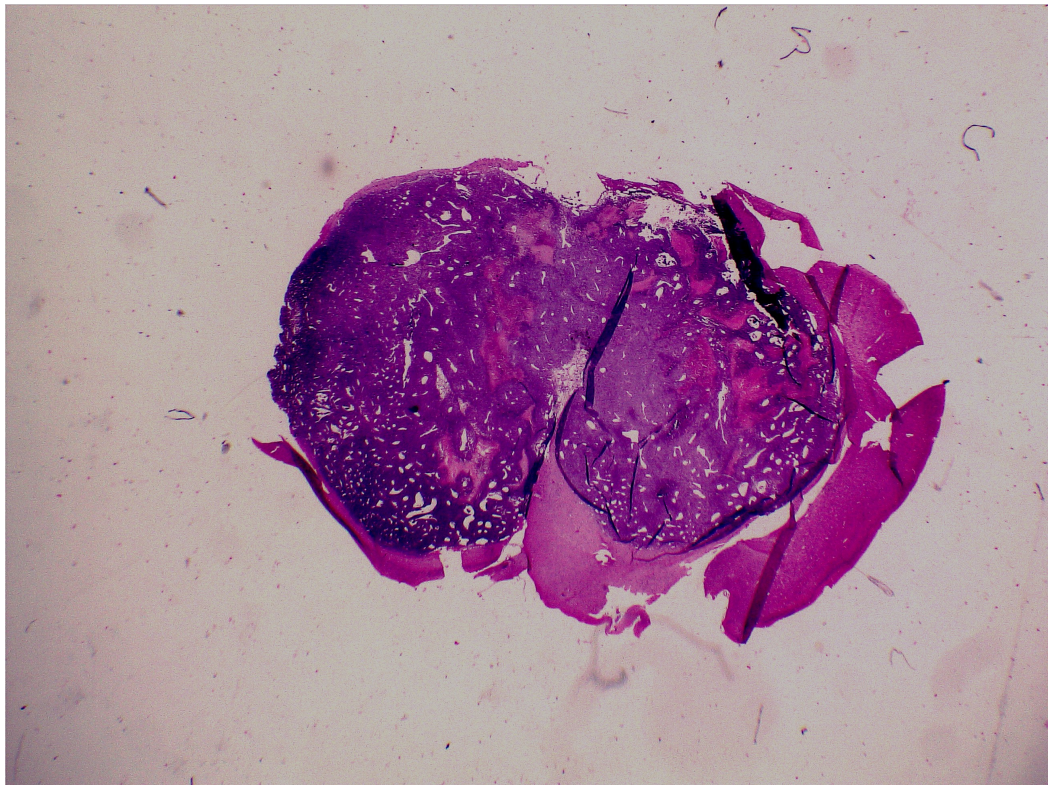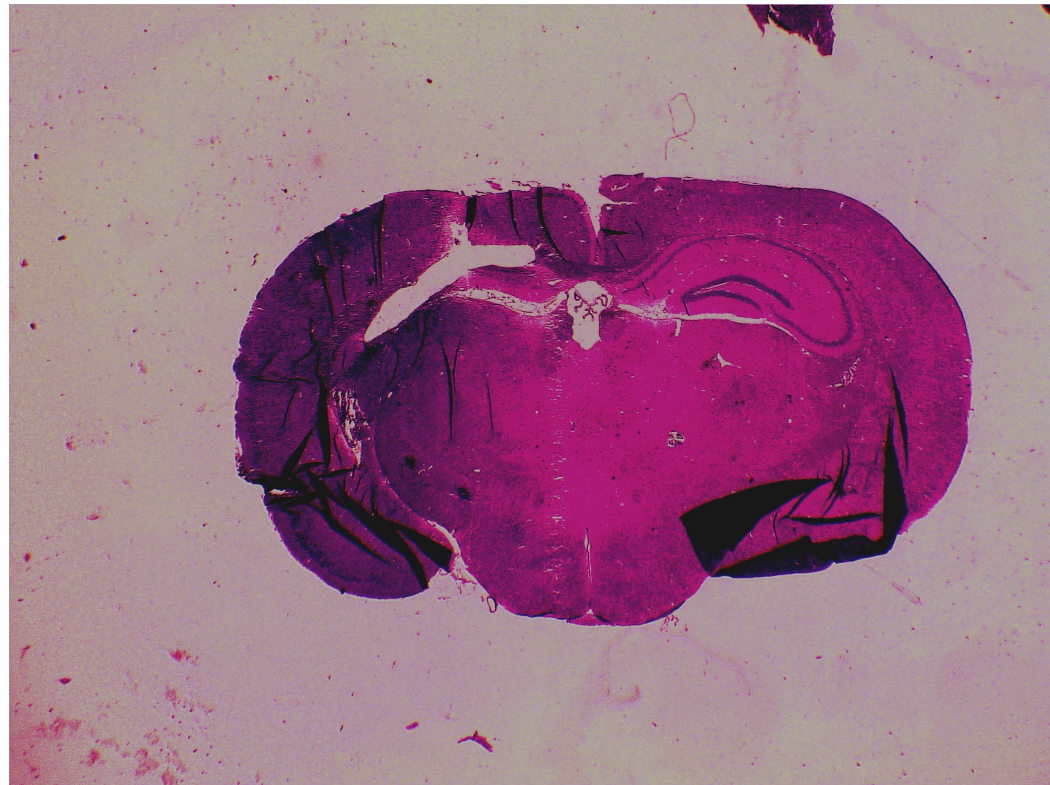

Supplement: fig5-data4 [file elife-78972-fig5-data4-v3.zip]

AGR53-GSC/miRNT (Dox+)

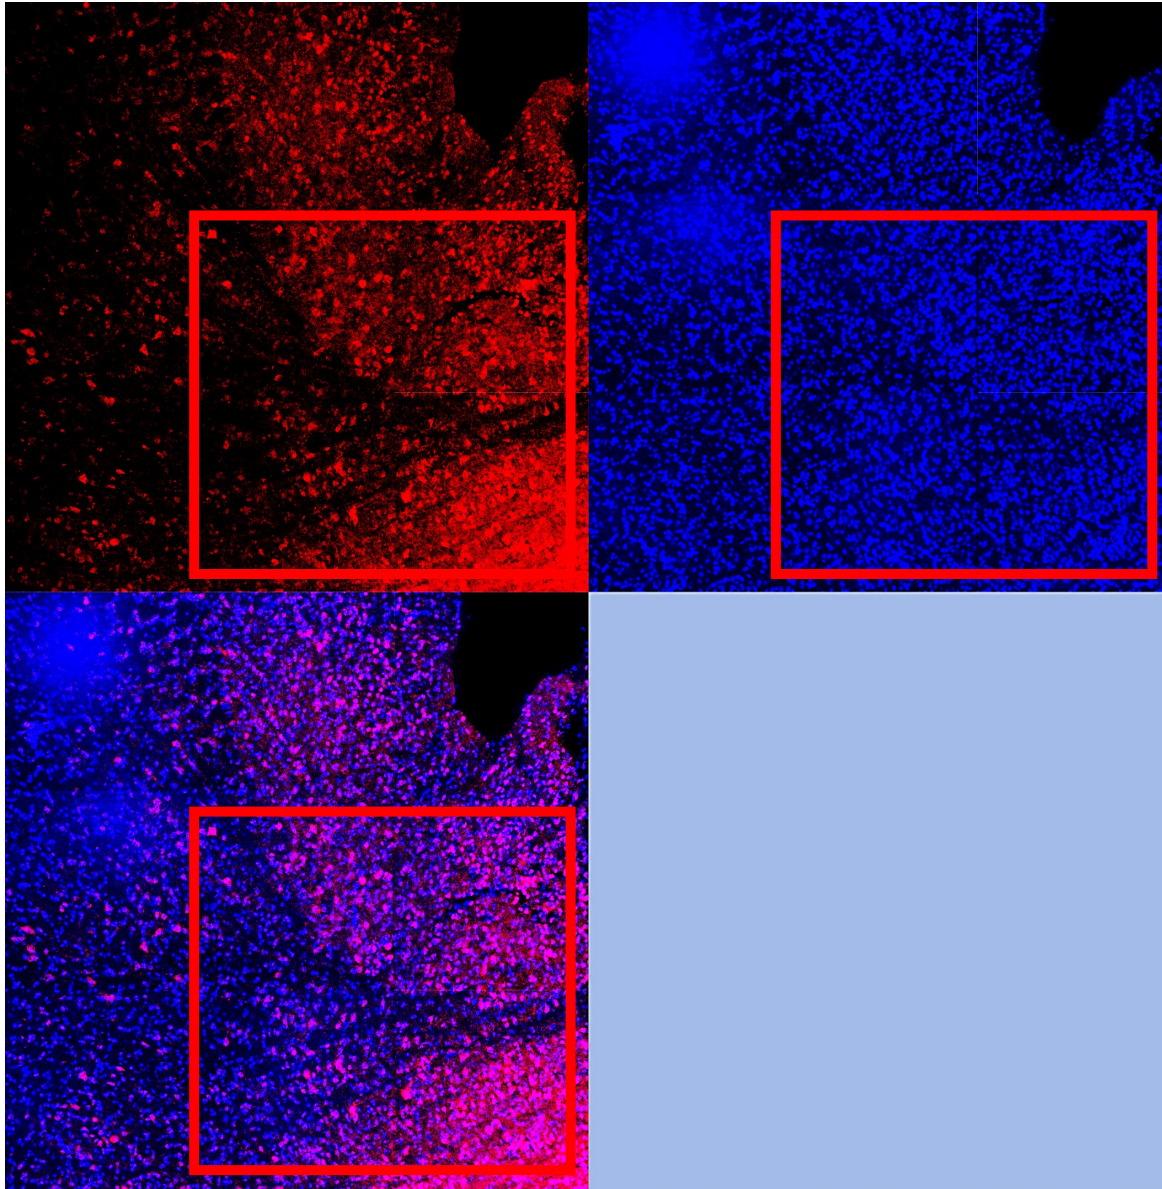

AGR53-GSC/miRFMOD (Dox+)

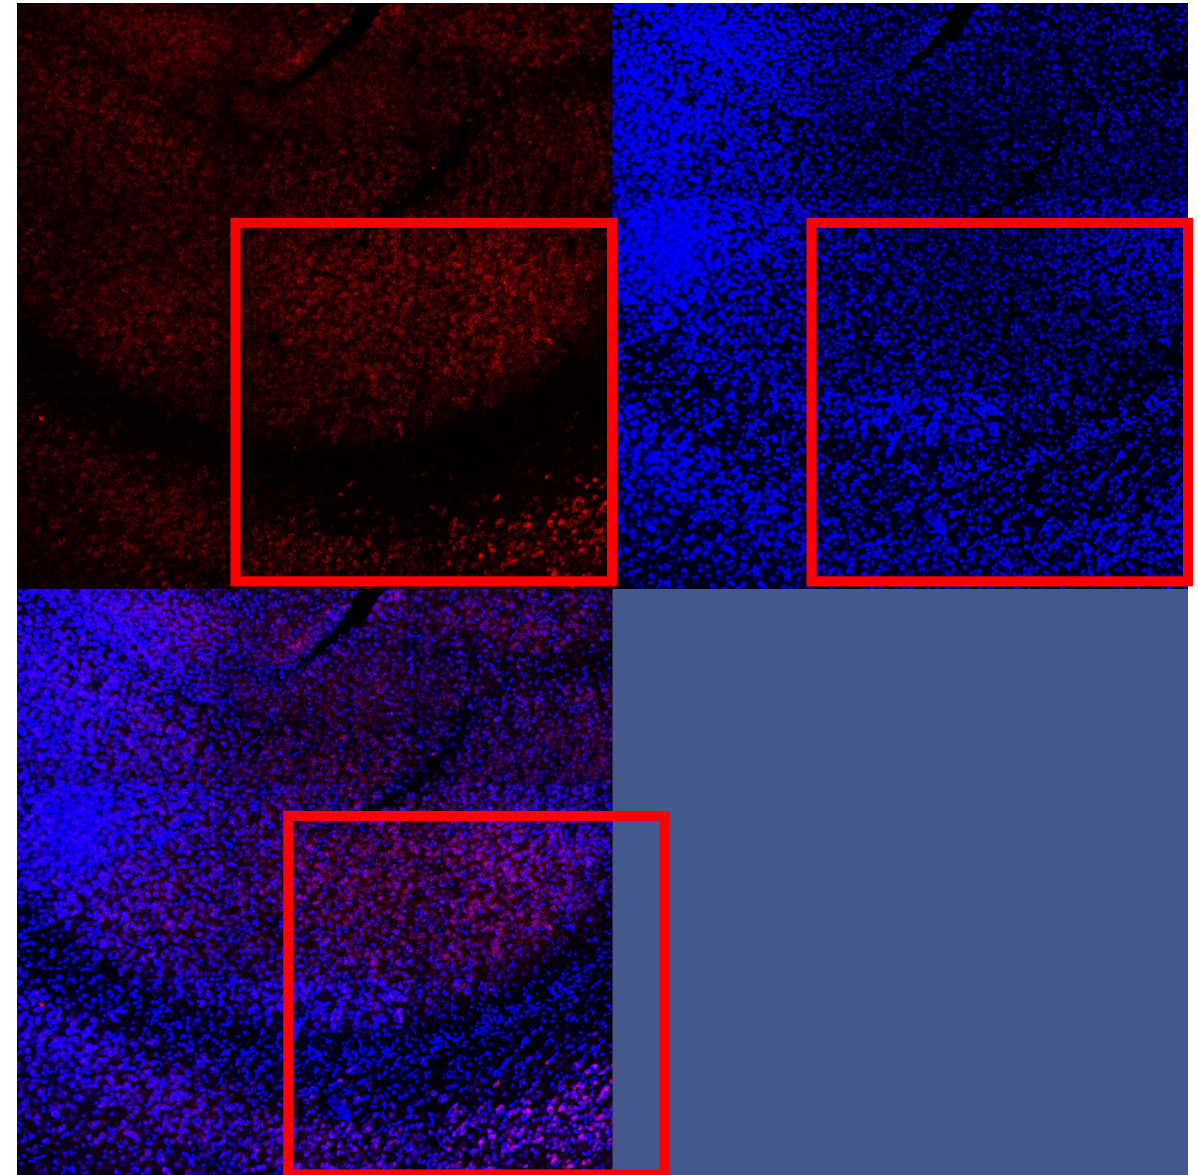

Supplement: fig5-data5 [file RAW IMAGES FOR PANEL F.pdf › Figure 5-Source data F/RAW IMAGES FOR PANEL F.pdf]

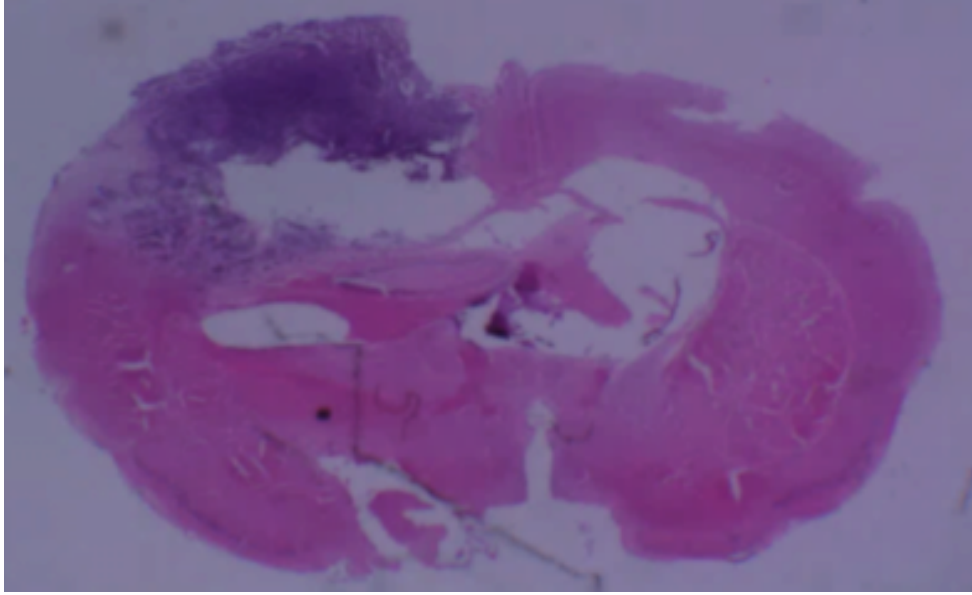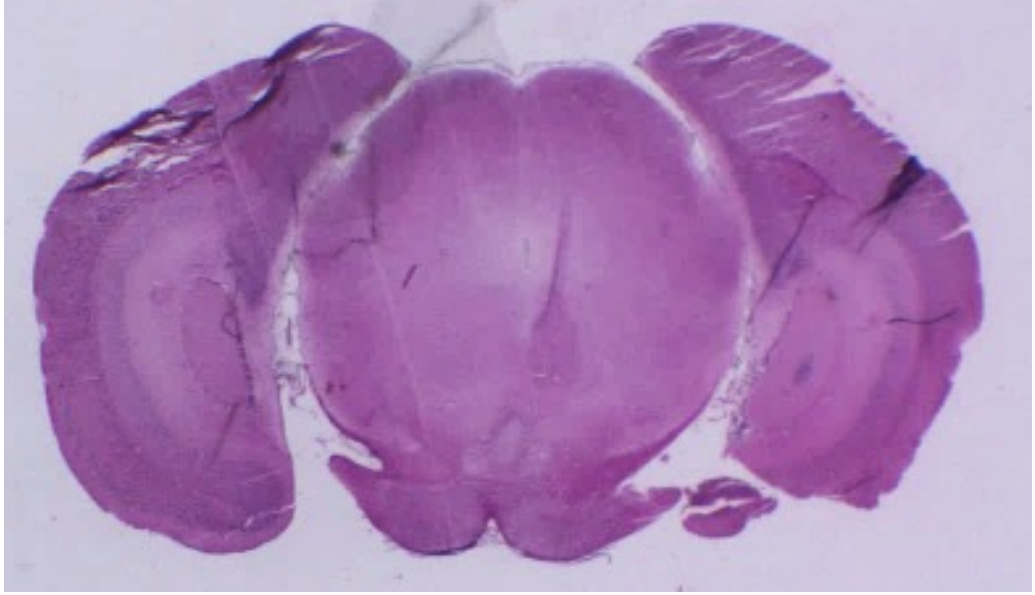

Supplement: fig5-figsupp1-data1 [file elife-78972-fig5-figsupp1-data1-v3.zip]

DAY1

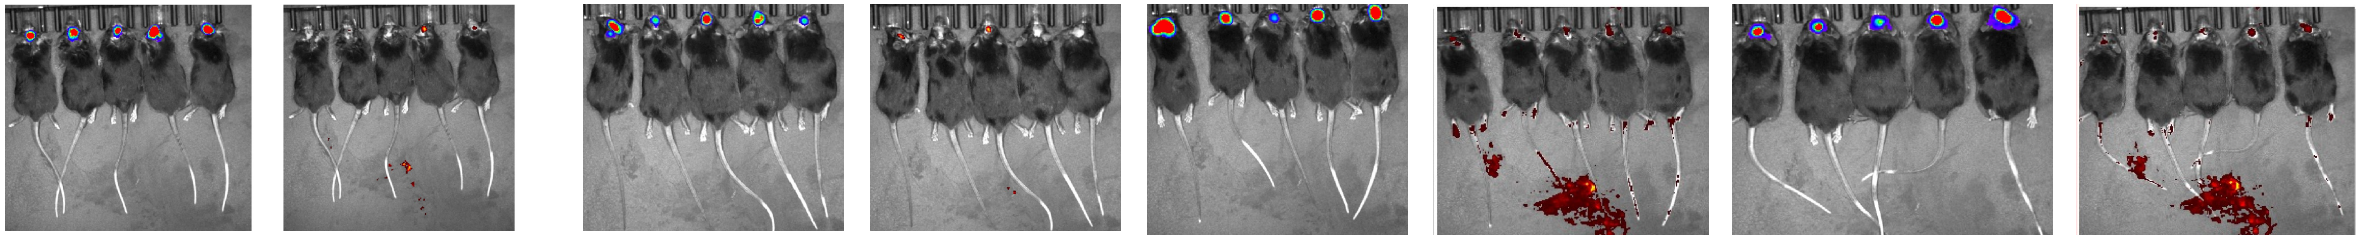

DAY2

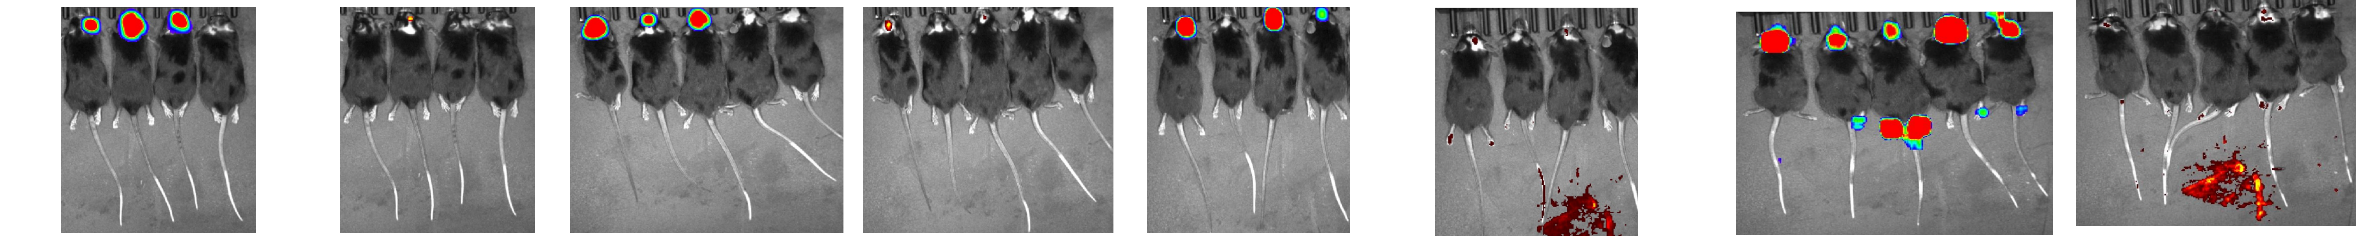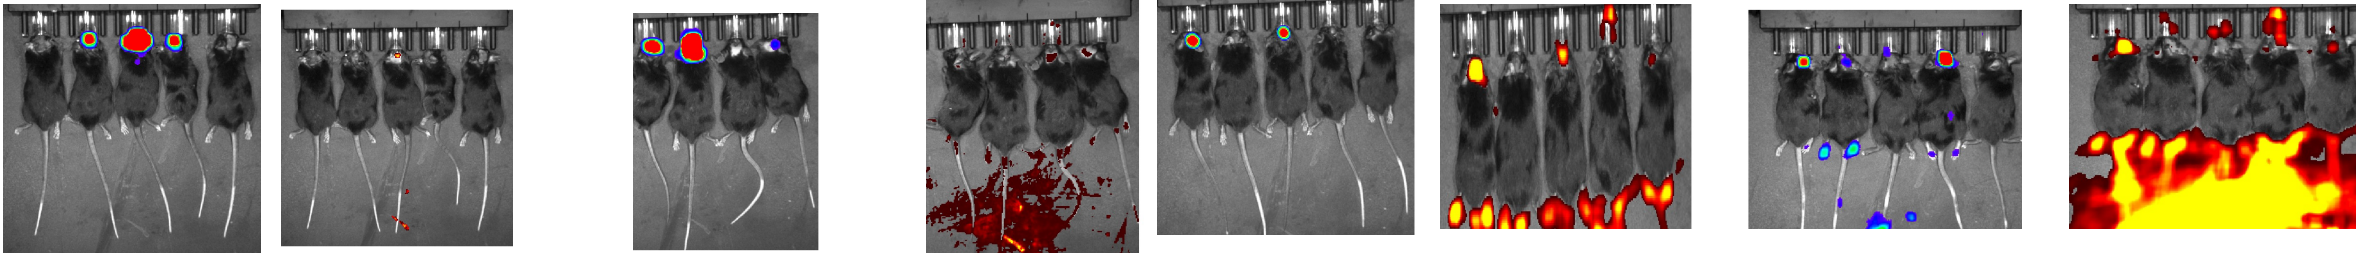

DAY4

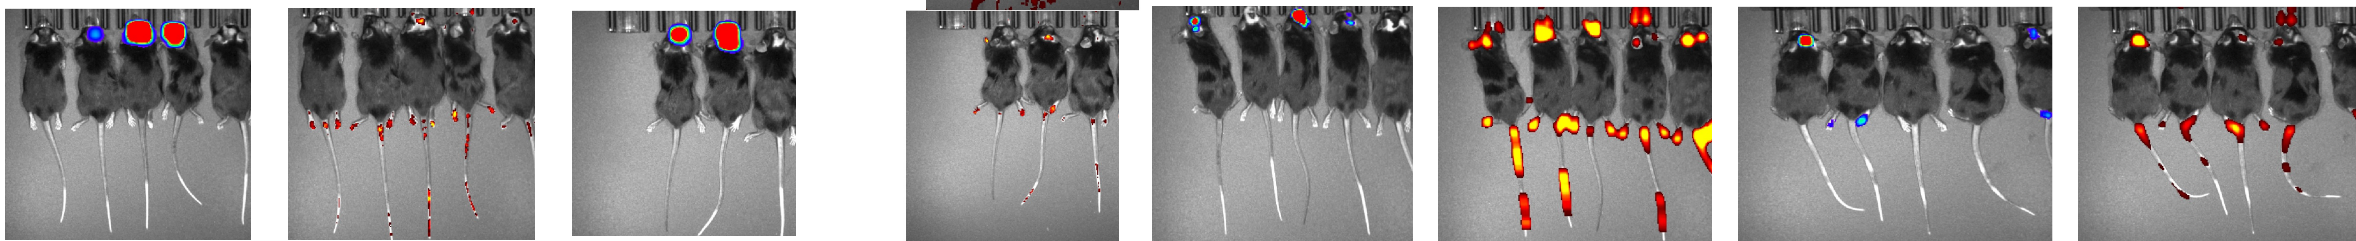

DAY5

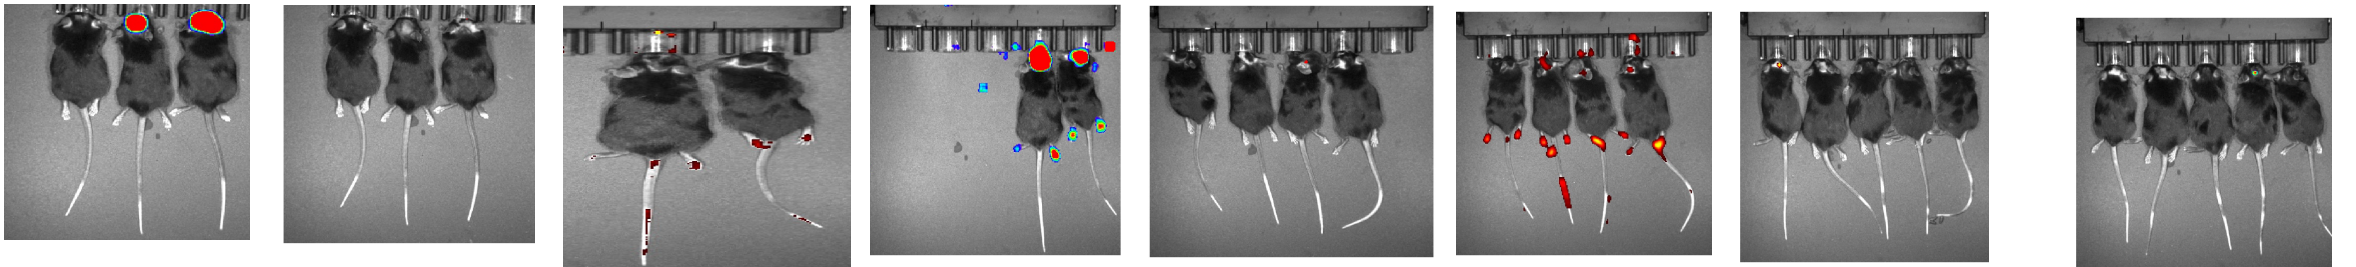

Supplement: fig5-figsupp1-data1 [file elife-78972-fig5-figsupp1-data1-v3.zip]

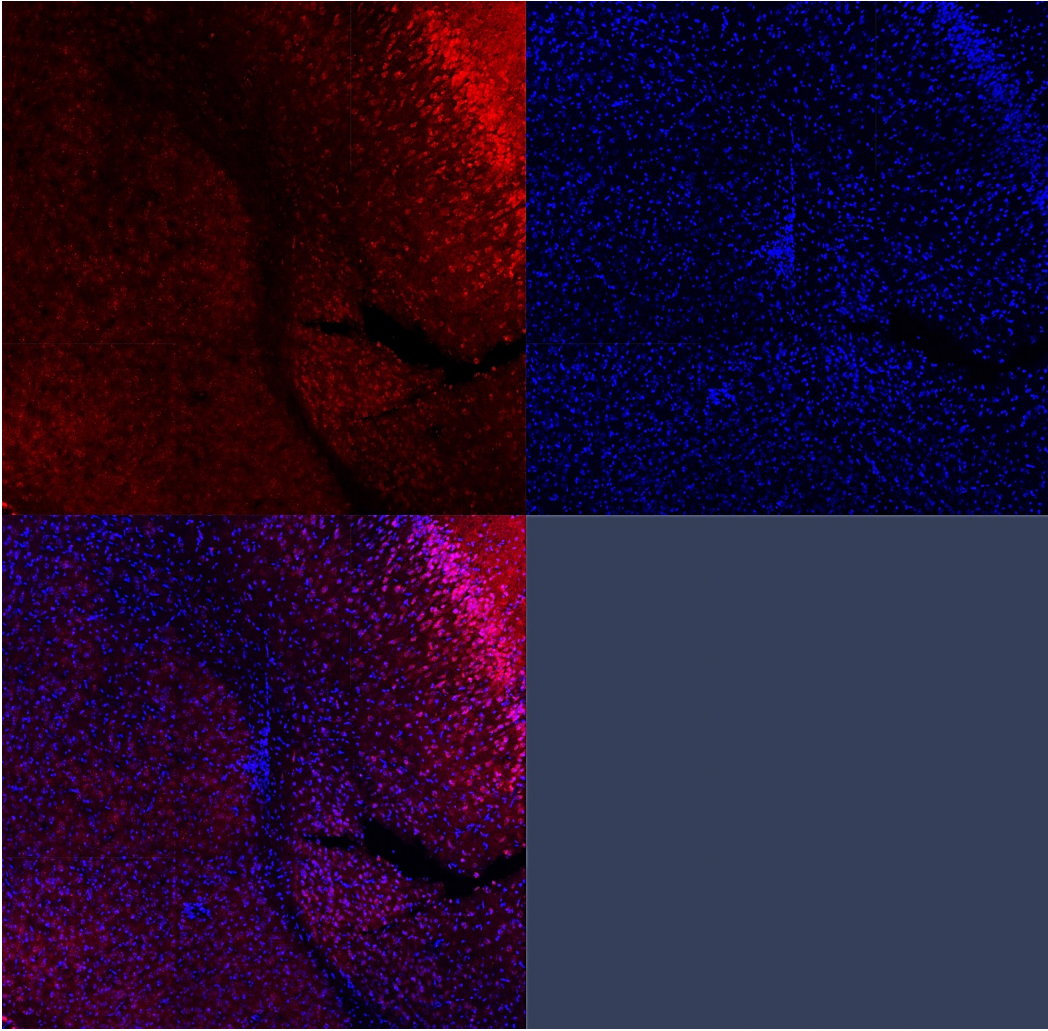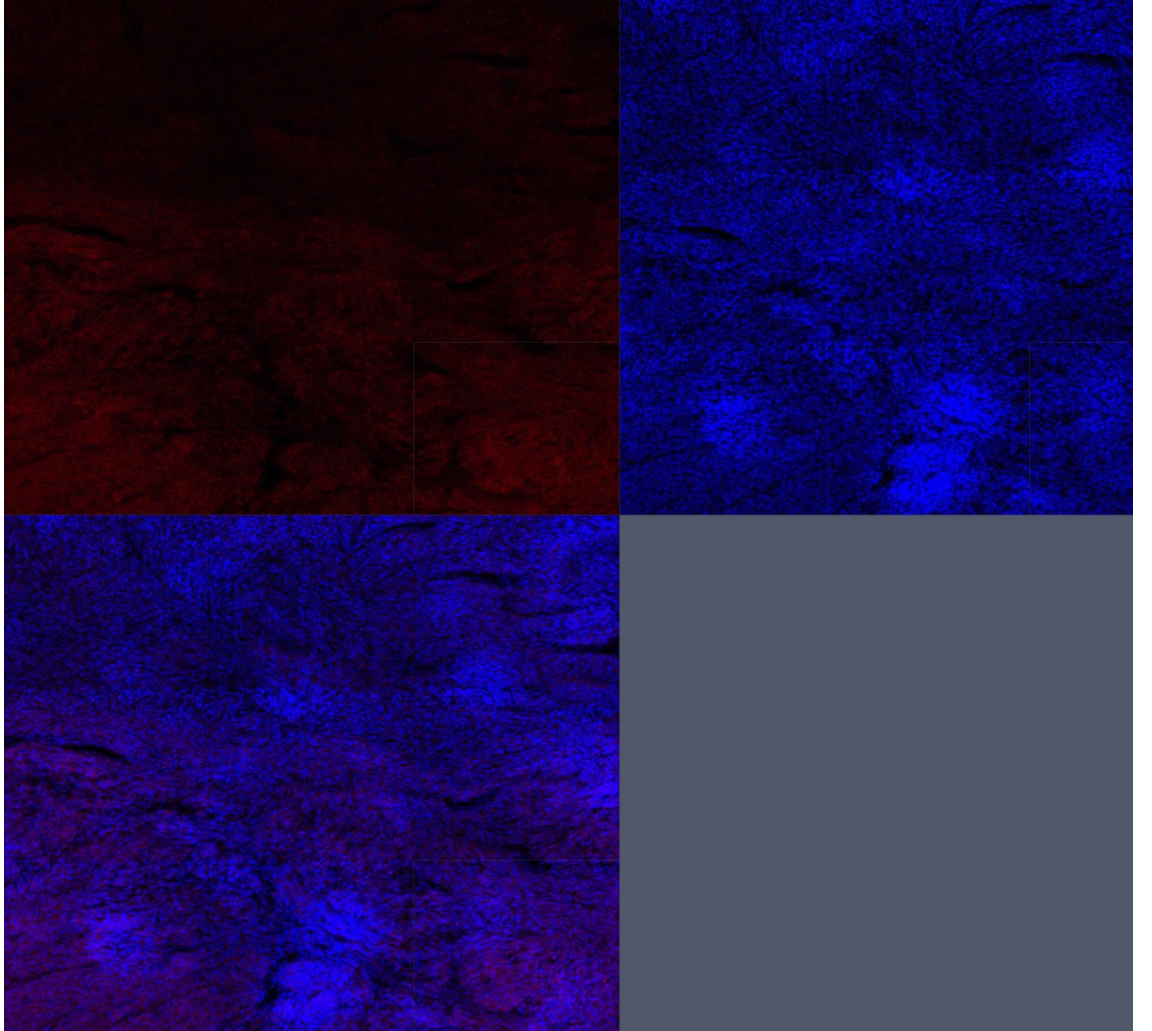

Supplement: fig5-figsupp1-data1 [file elife-78972-fig5-figsupp1-data1-v3.zip]

## IgG GSC

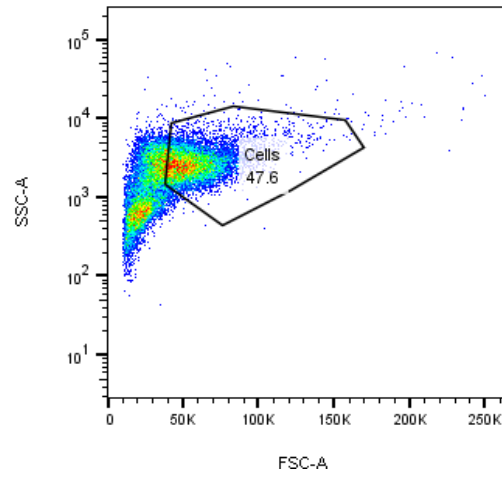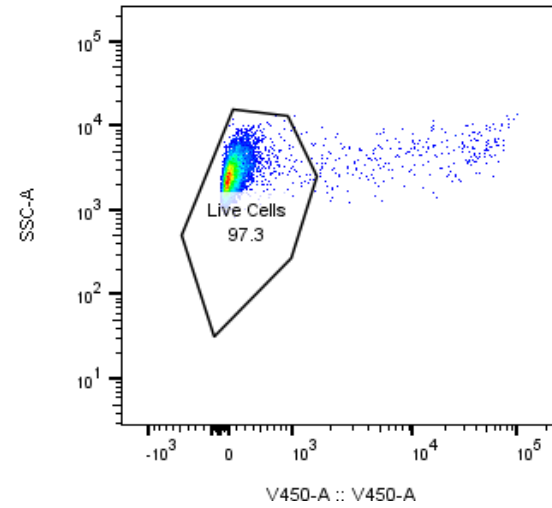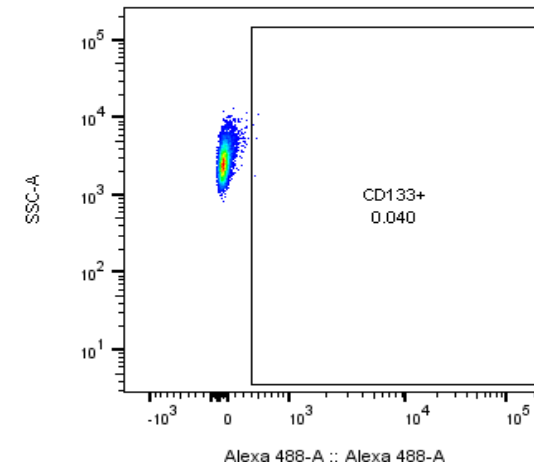

## CD133 GSC

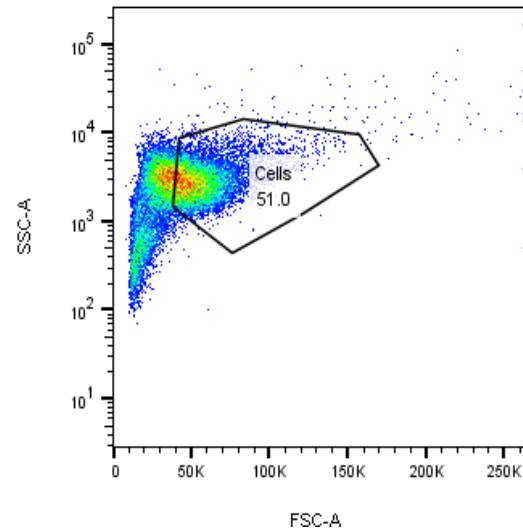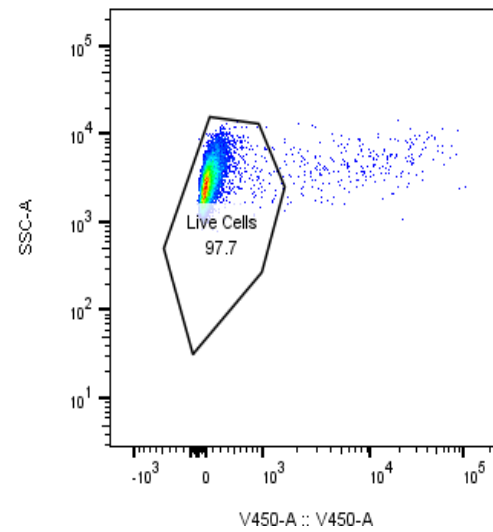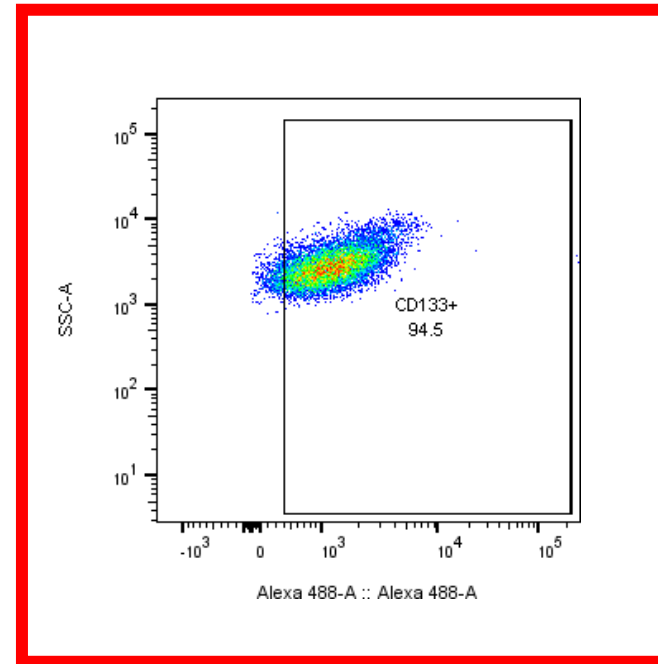

## IgG DGC

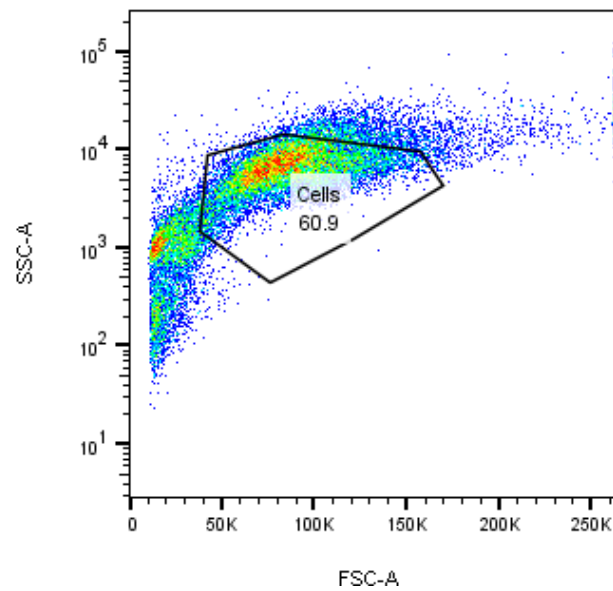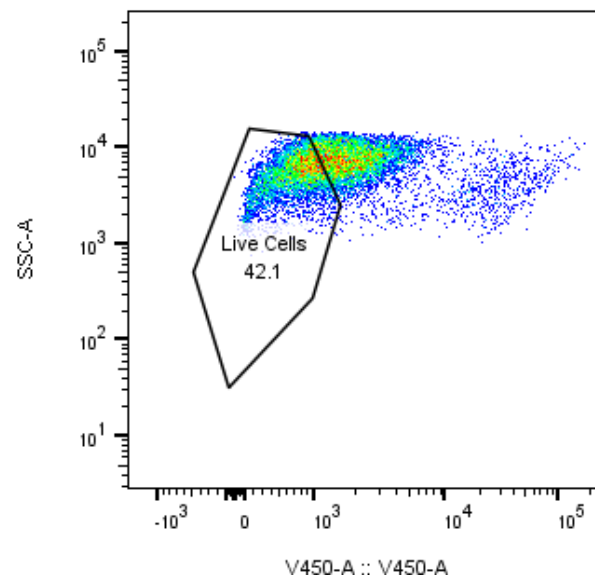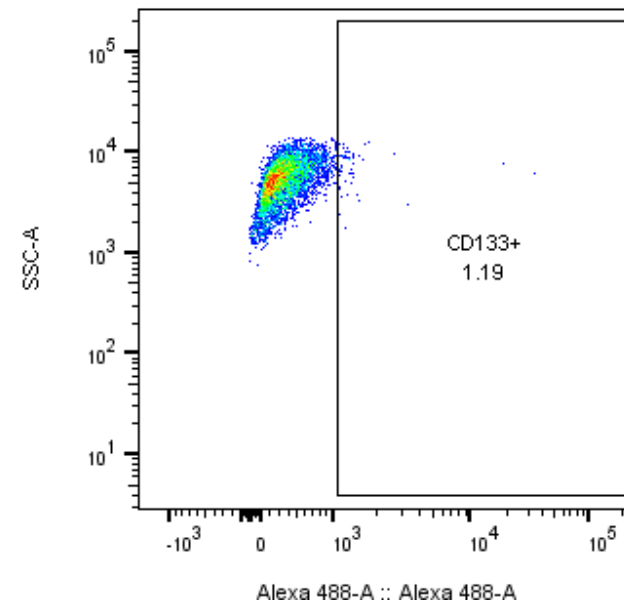

## CD133 DGC

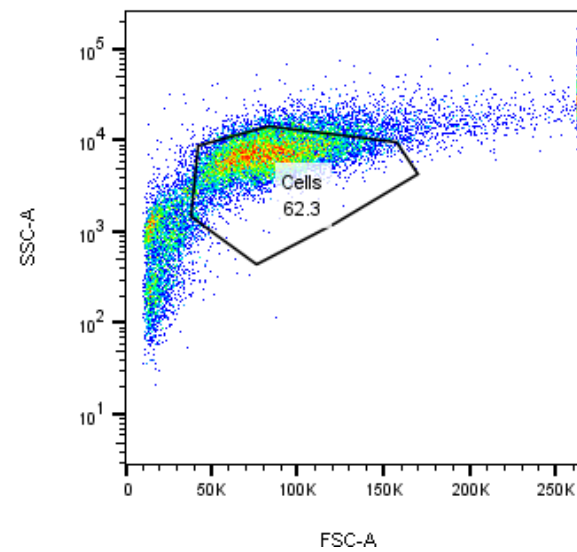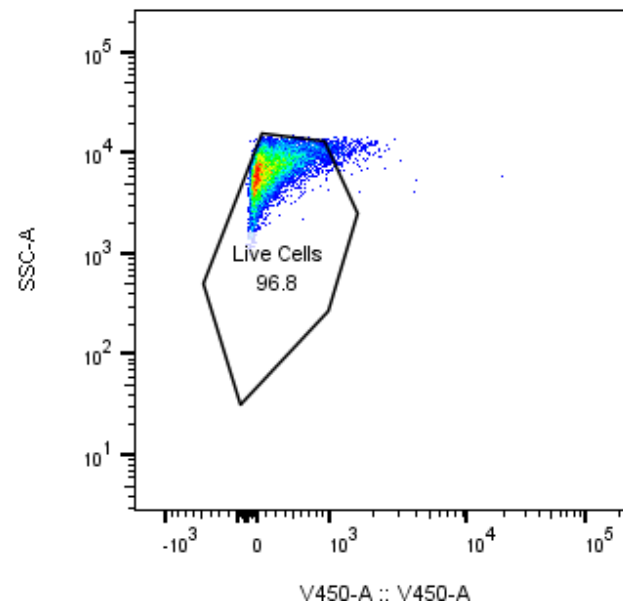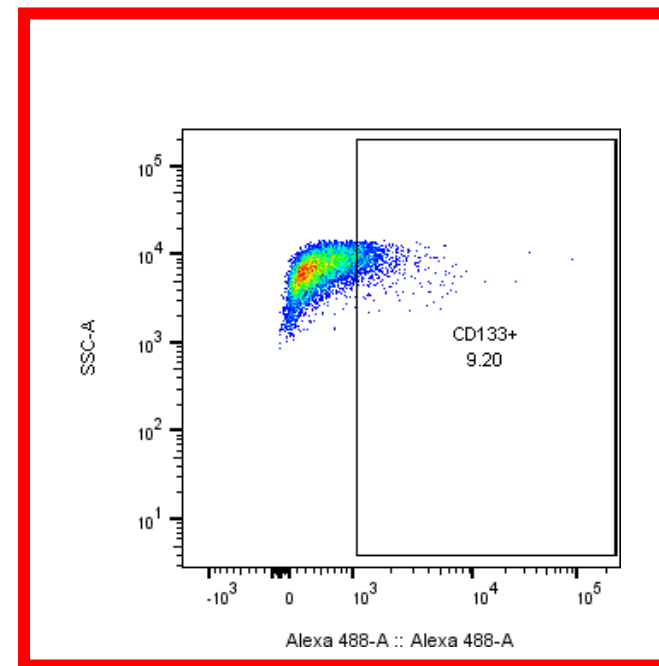

Supplement: fig6-data1 [file ALL ANALYSIS PLOTS FOR PANEL A.pdf › Figure 6-Source data A/ALL ANALYSIS PLOTS FOR PANEL A.pdf]

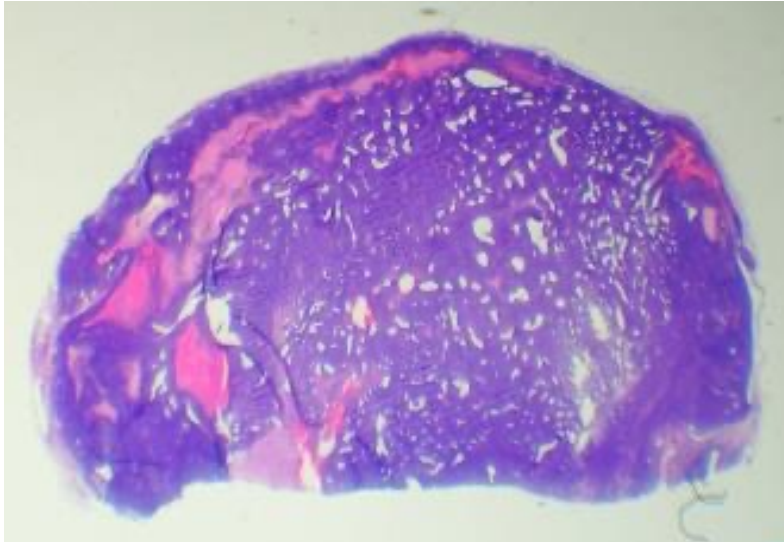

**MGG8-GSC/shNT**

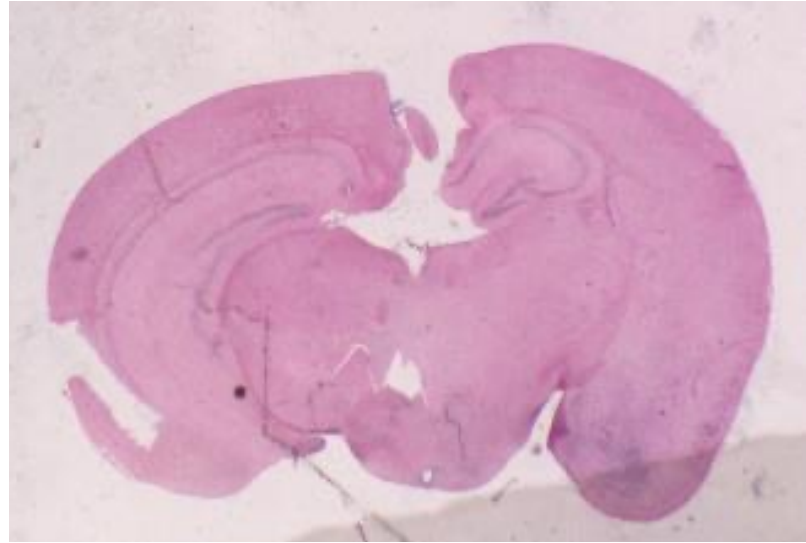

**MGG8-GSC/shFMOD**

Supplement: fig6-data3 [file IMAGES FOR PANEL C.pdf › Figure 6-Source data C/IMAGES FOR PANEL C.pdf]

**MGG8-GSC/shNT**

**FMOD**

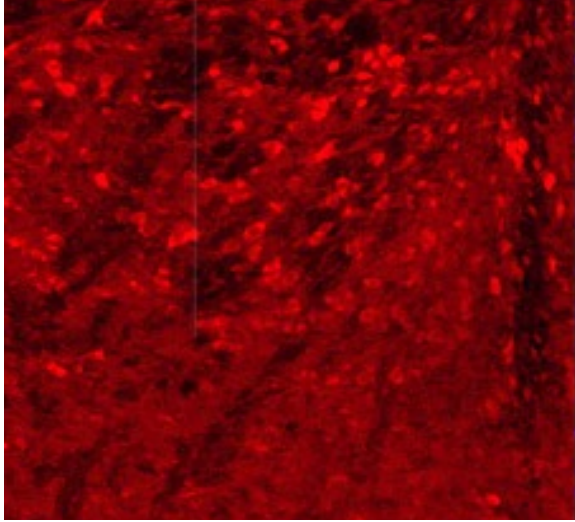

**H33342**

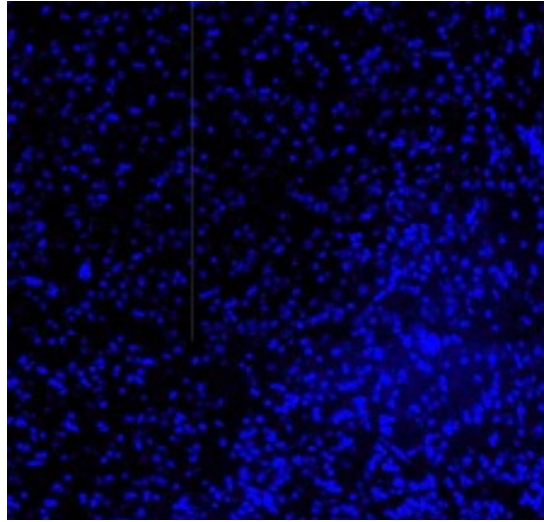

**MERGE**

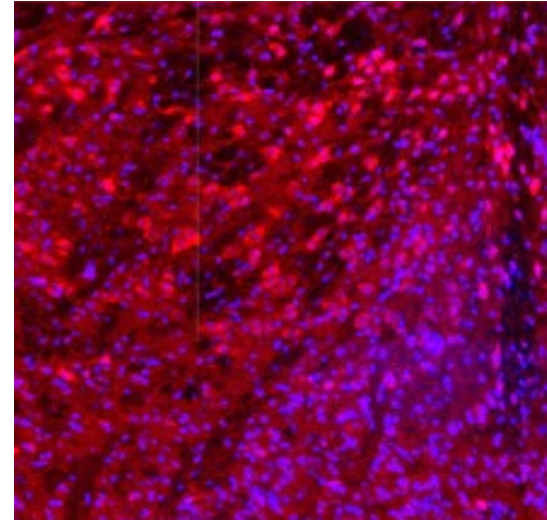

**MGG8-GSC/shFMOD**

**FMOD**

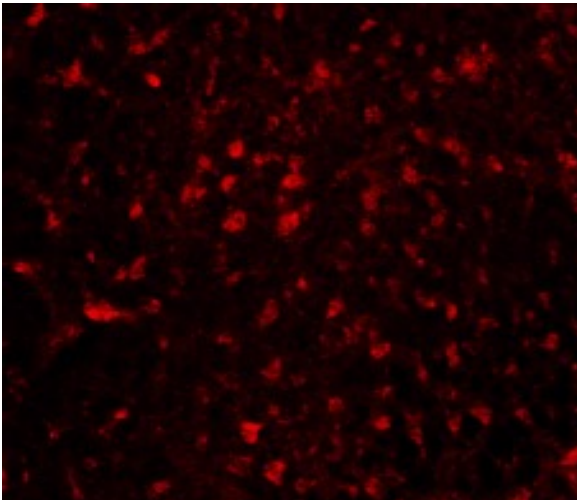

**H33342**

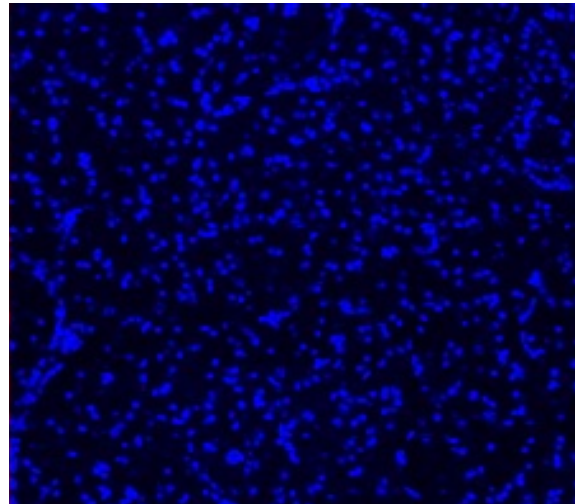

**MERGE**

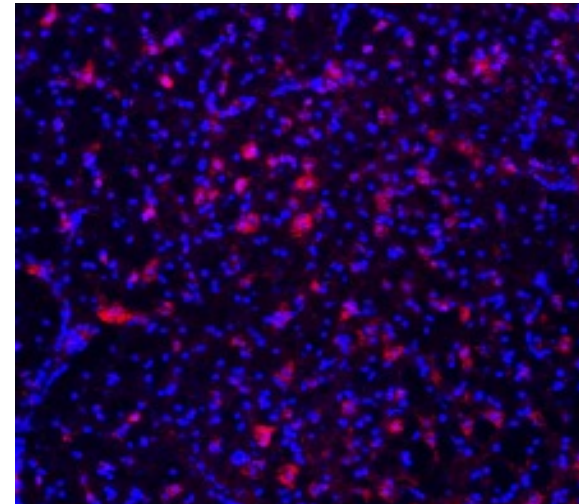

Supplement: fig6-data4 [file elife-78972-fig6-data4-v3.zip]

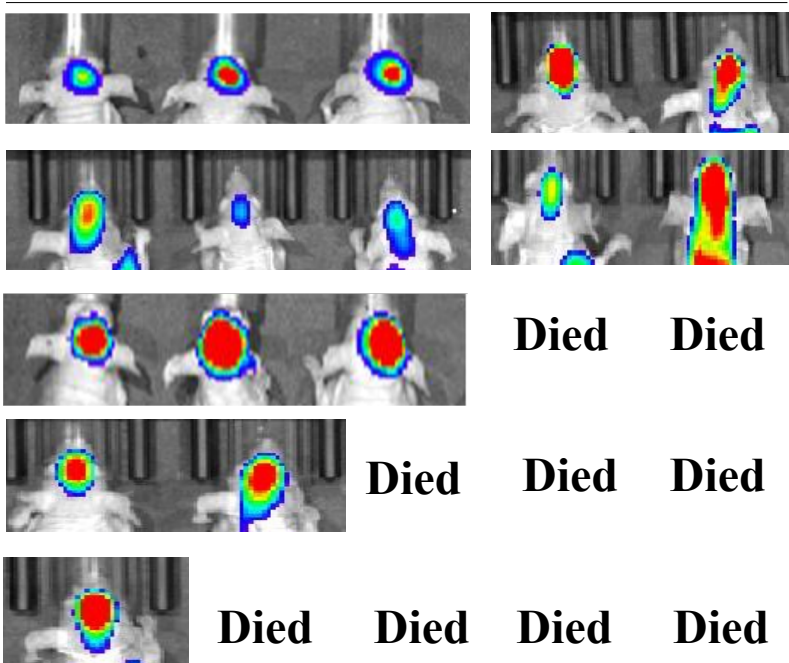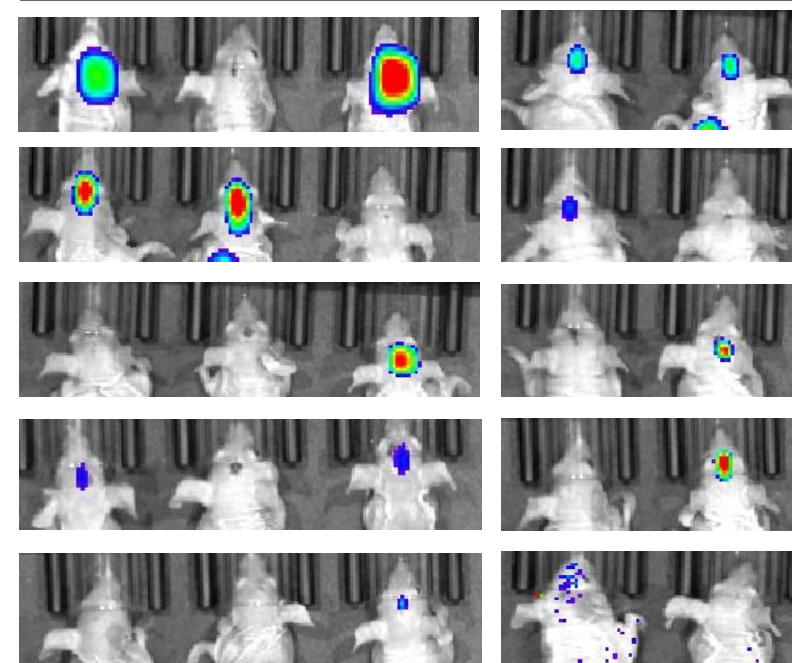

Supplement: fig6-figsupp1-data1 [file elife-78972-fig6-figsupp1-data1-v3.zip]

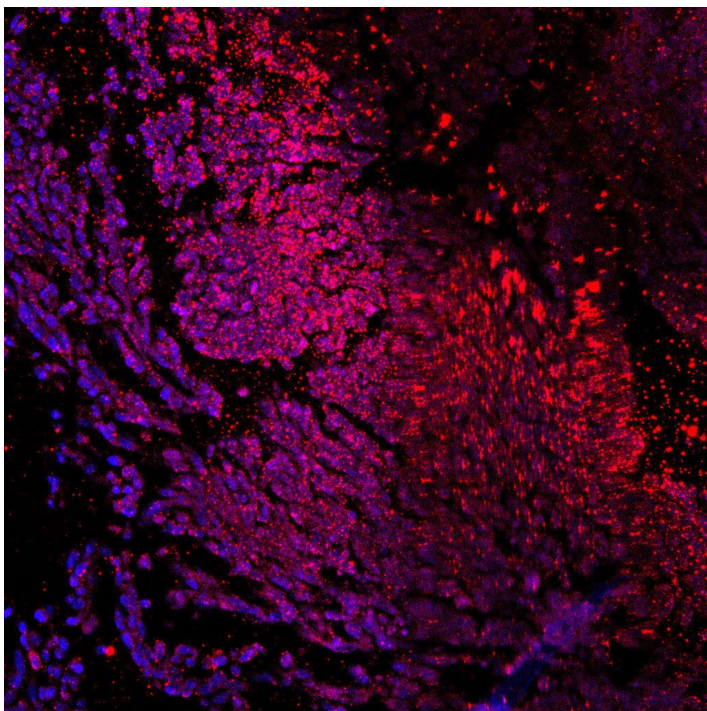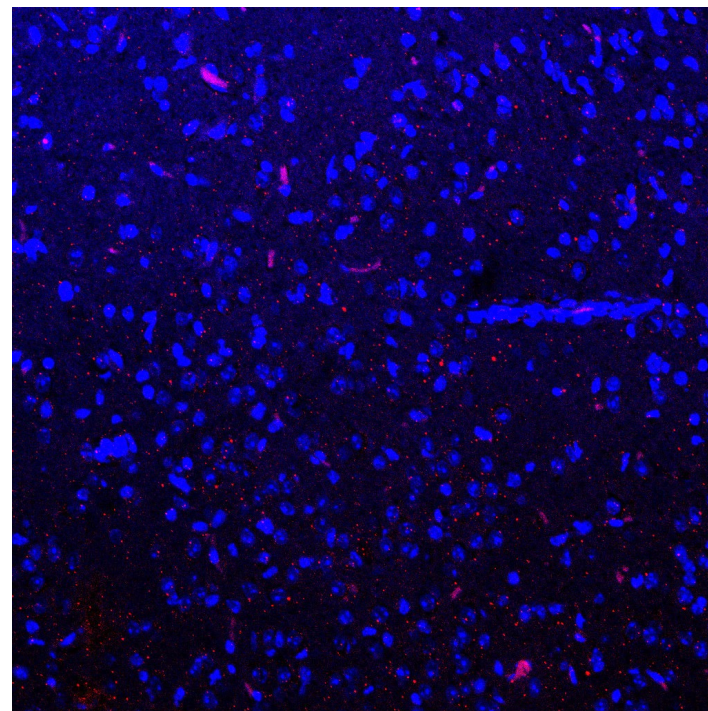

Supplement: fig6-figsupp1-data1 [file elife-78972-fig6-figsupp1-data1-v3.zip]

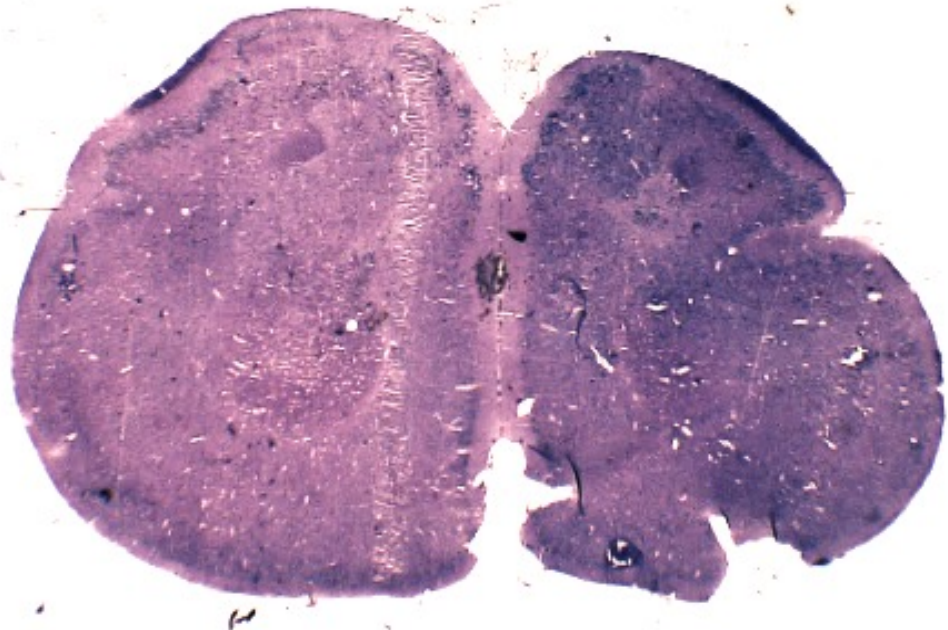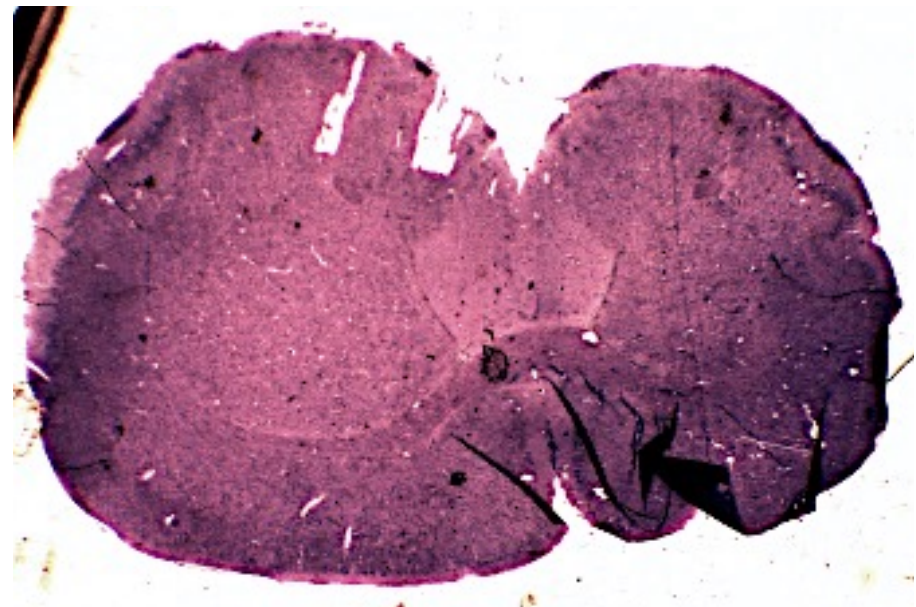

Supplement: fig6-figsupp1-data1 [file elife-78972-fig6-figsupp1-data1-v3.zip]

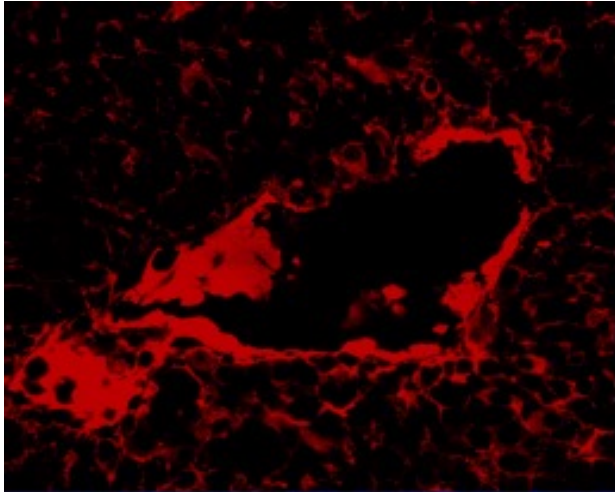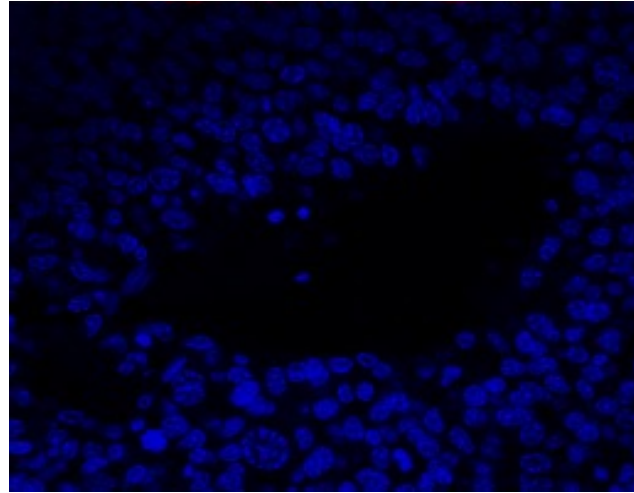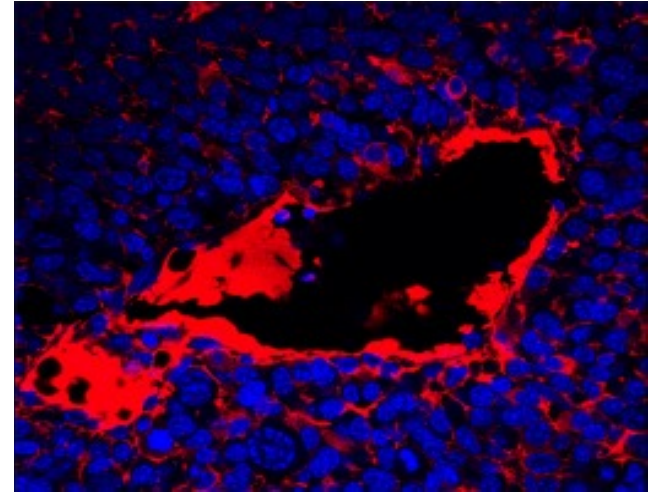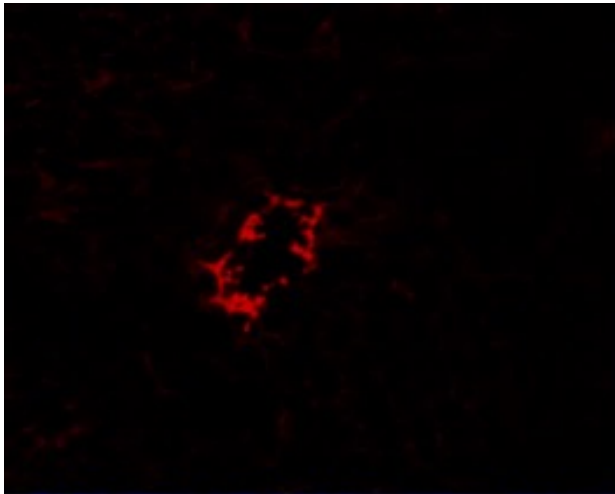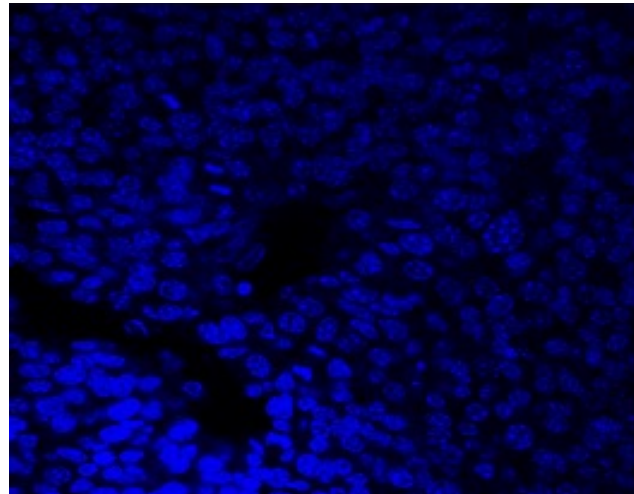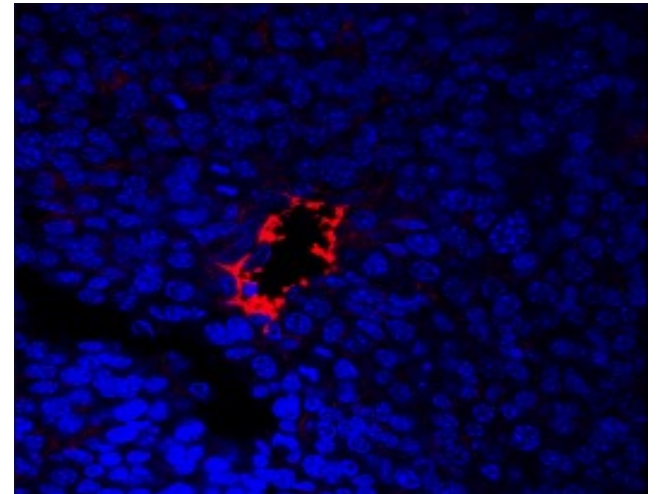

Supplement: fig7-data1 [file IMAGES FOR PANEL A.pdf › Figure 7-Source data A/IMAGES FOR PANEL A.pdf]

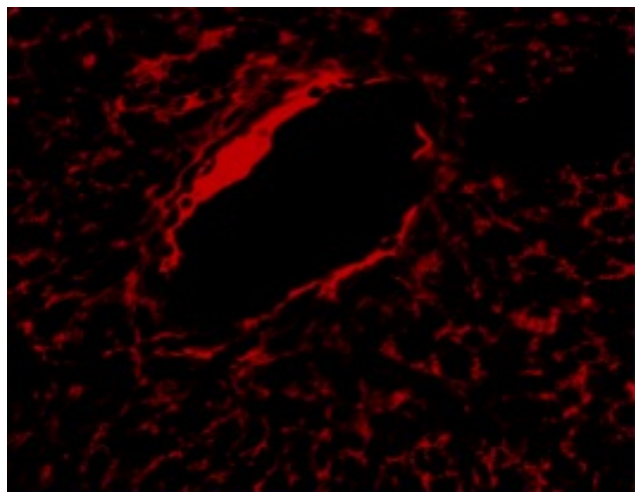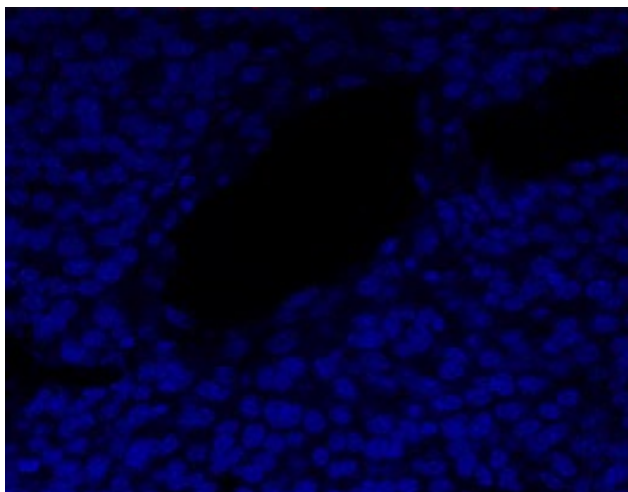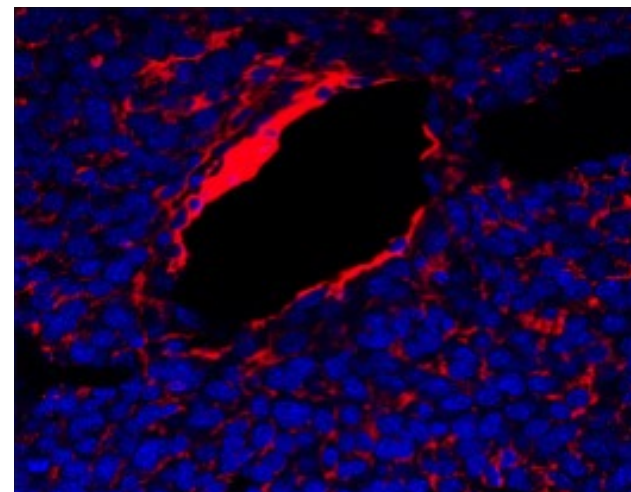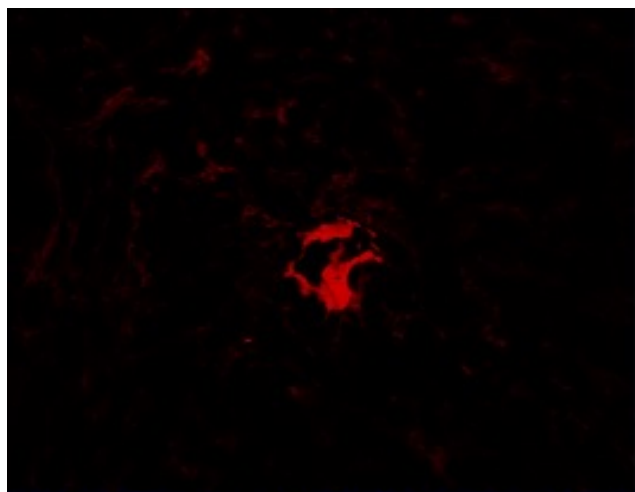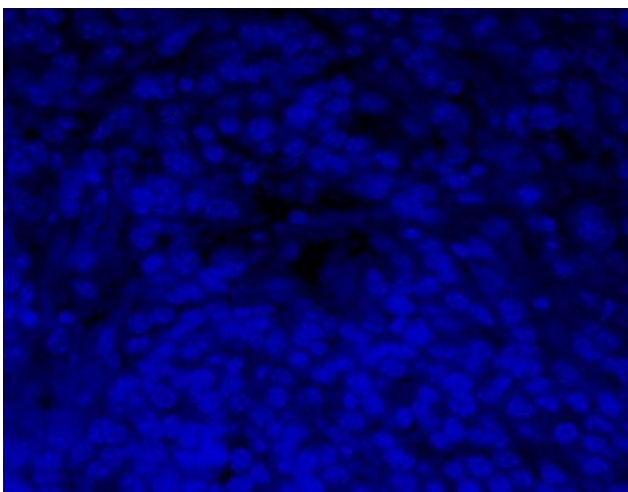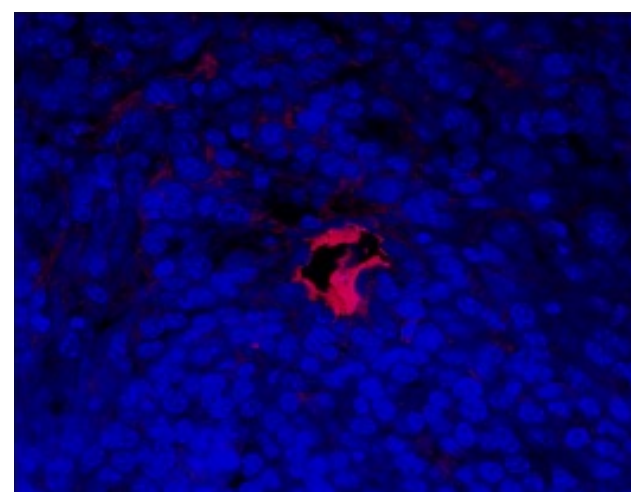

Supplement: fig7-data3 [file elife-78972-fig7-data3-v3.zip]

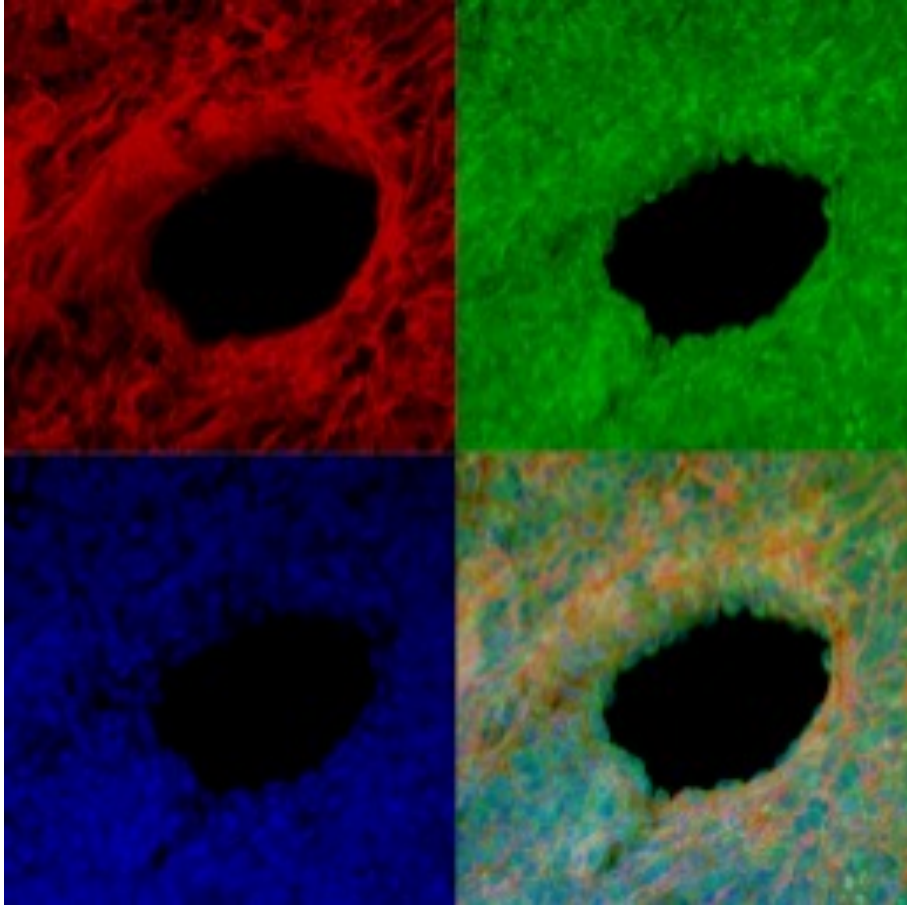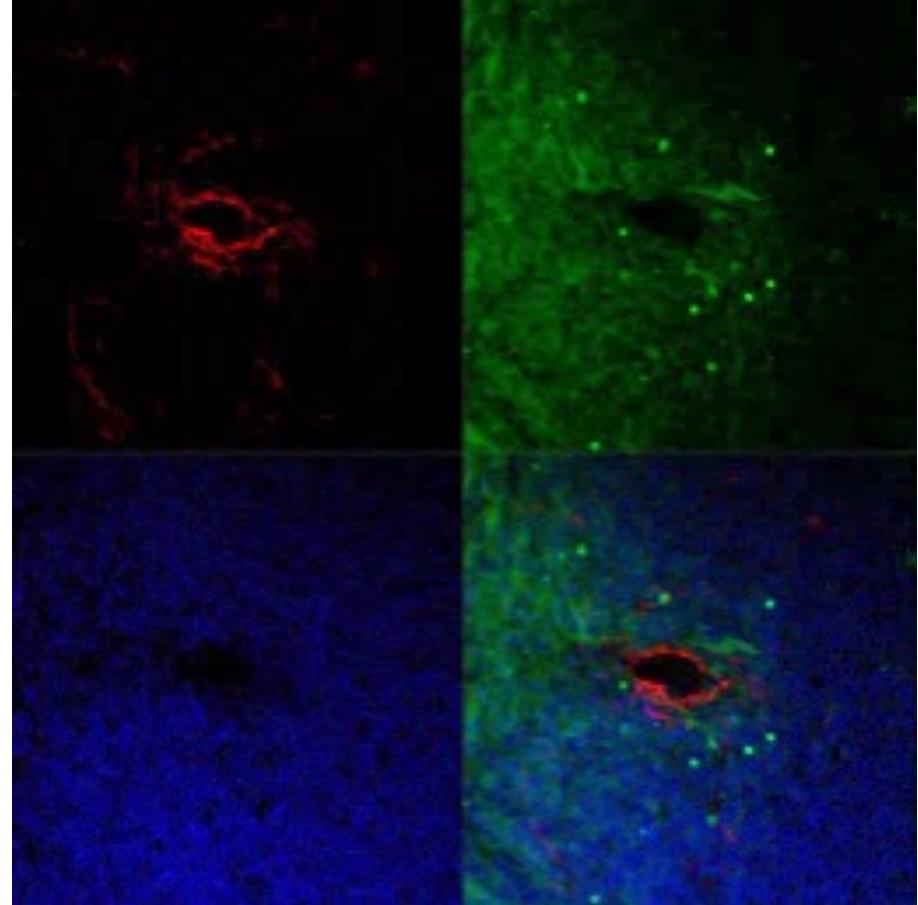

Supplement: fig7-data5 [file IMAGES FOR PANEL G.pdf › Figure 7-Source data G/IMAGES FOR PANEL G.pdf]

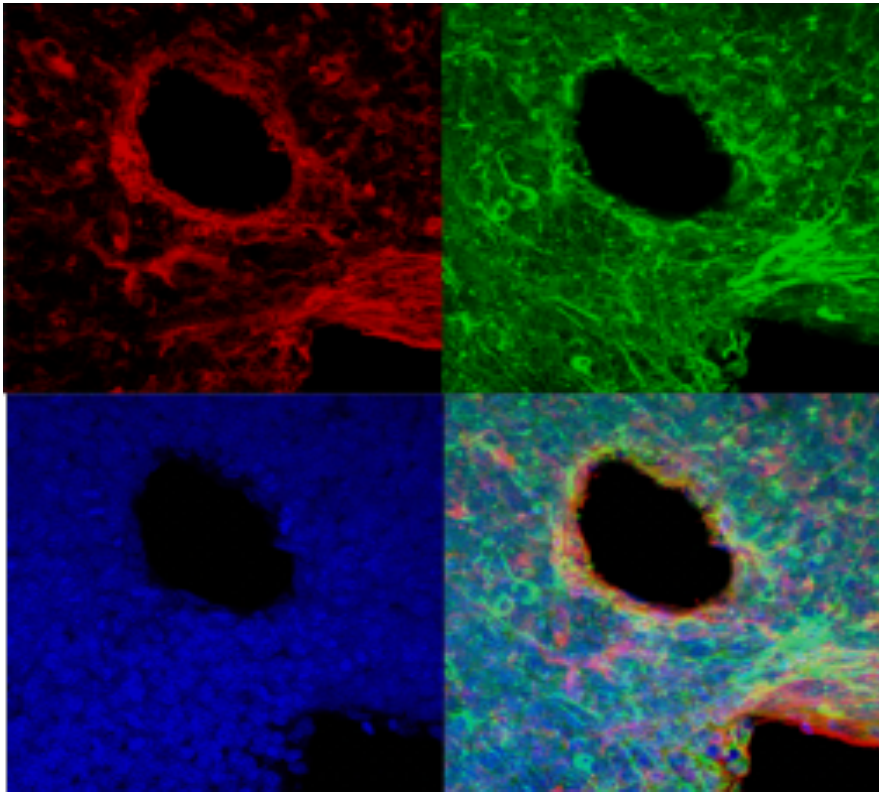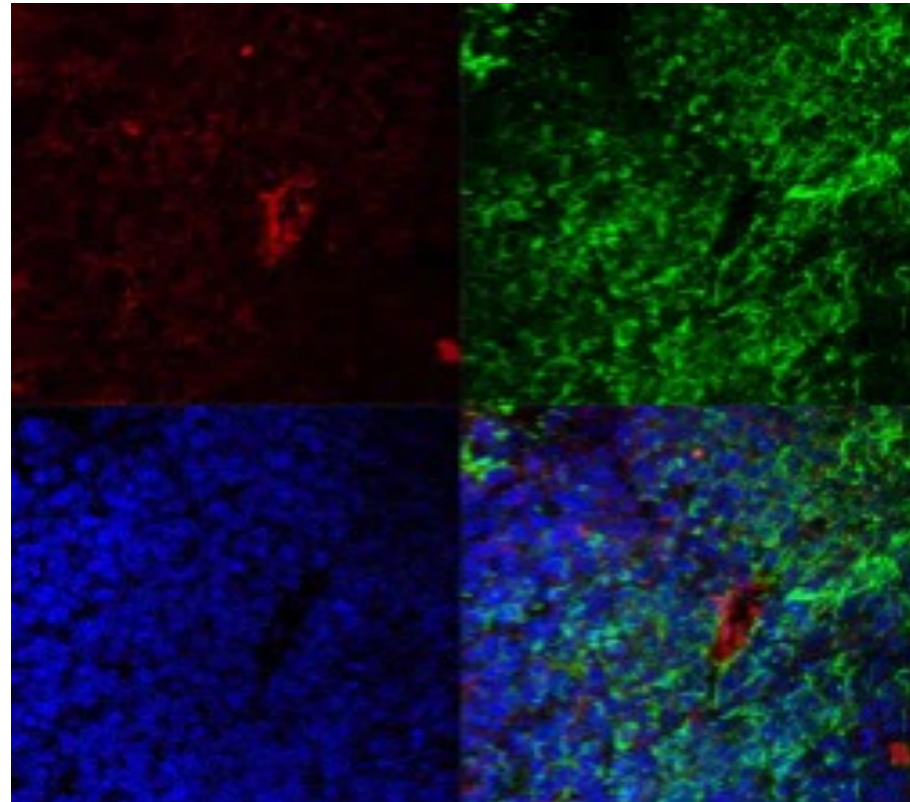

Supplement: fig7-data6 [file elife-78972-fig7-data6-v3.zip]

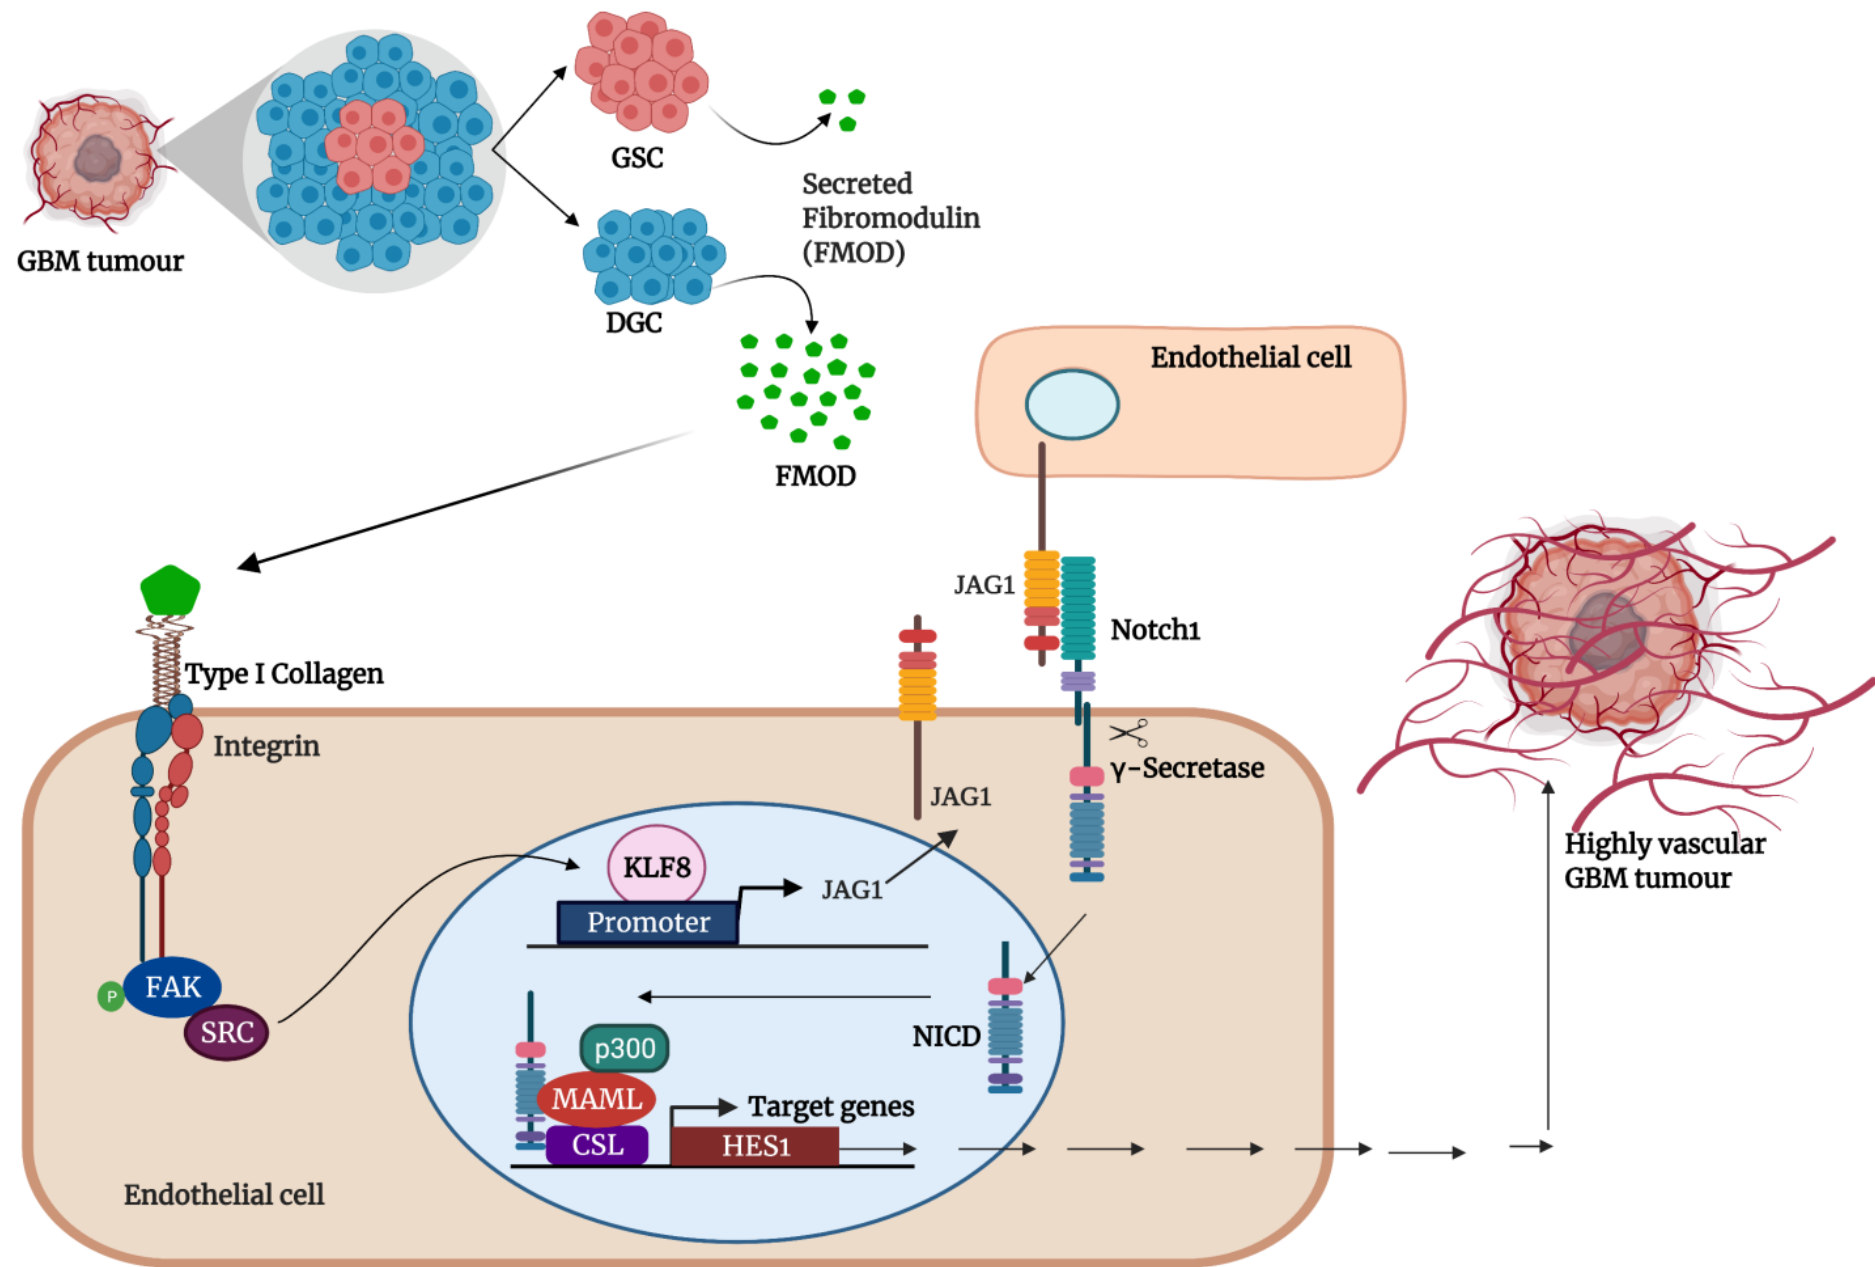

Supplement: fig7-data7 [file elife-78972-fig7-data7-v3.zip]

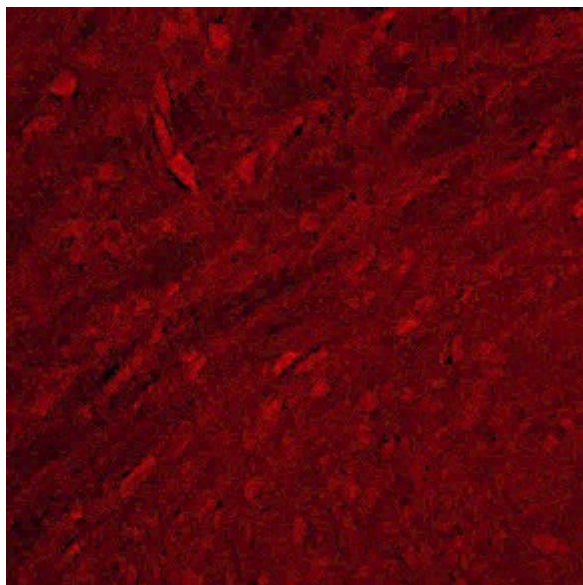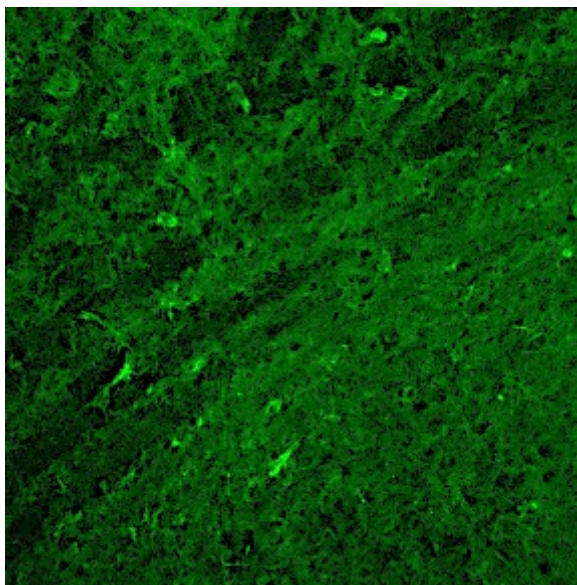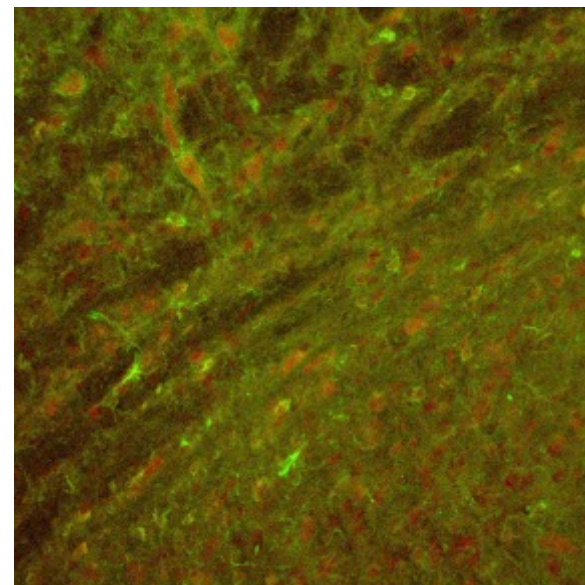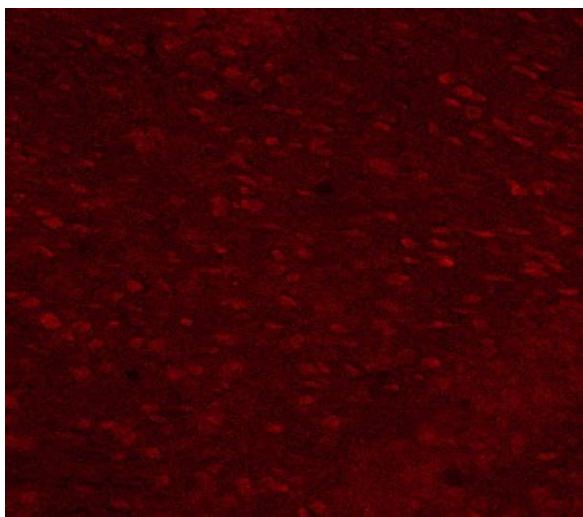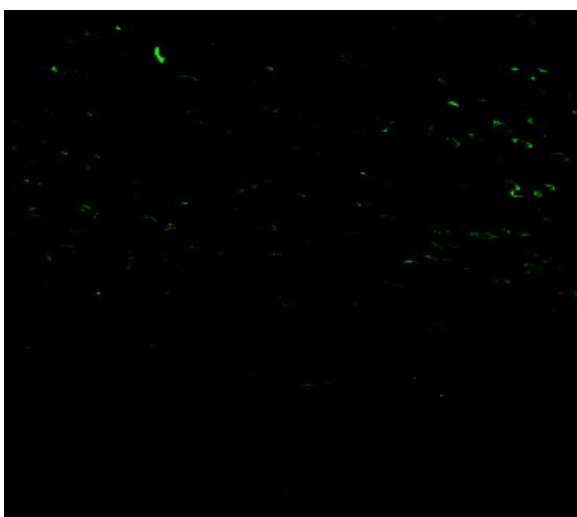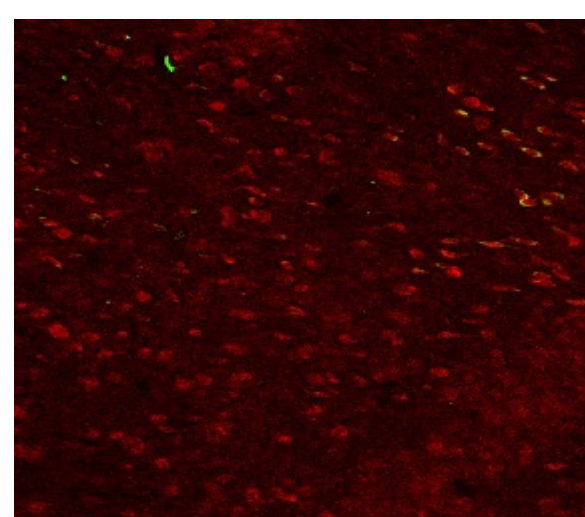

Supplement: fig7-figsupp1-data1 [file elife-78972-fig7-figsupp1-data1-v3.zip]

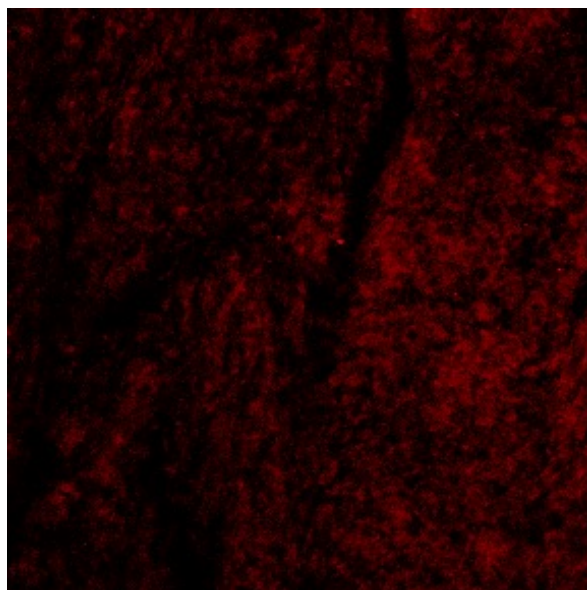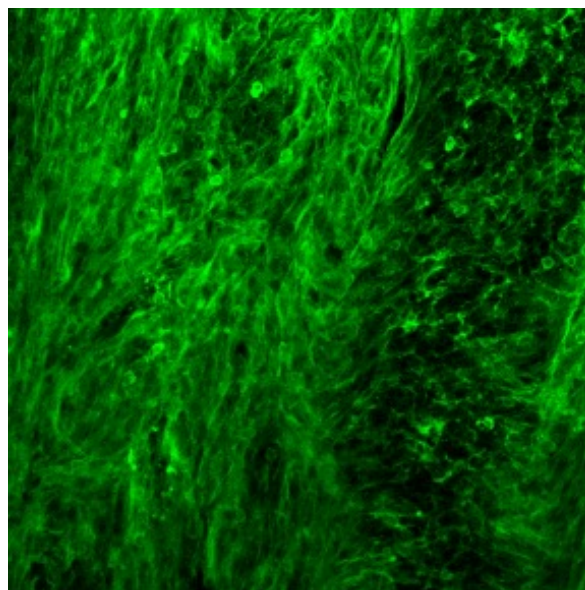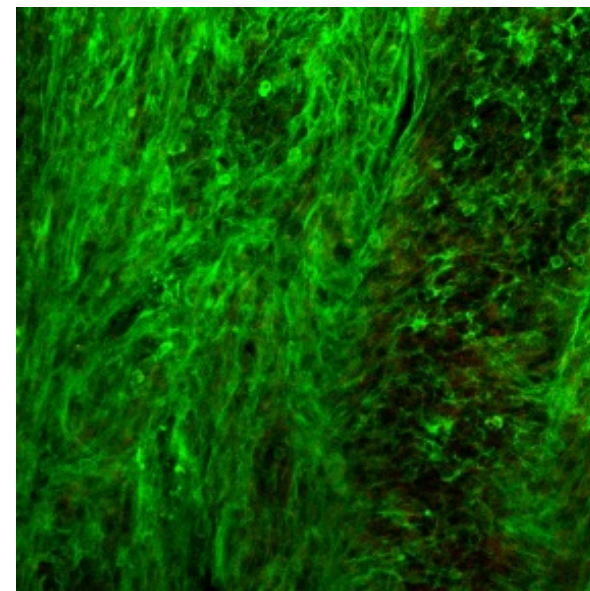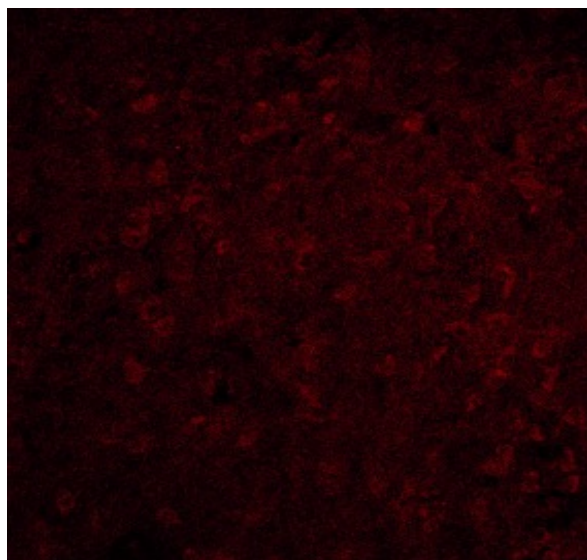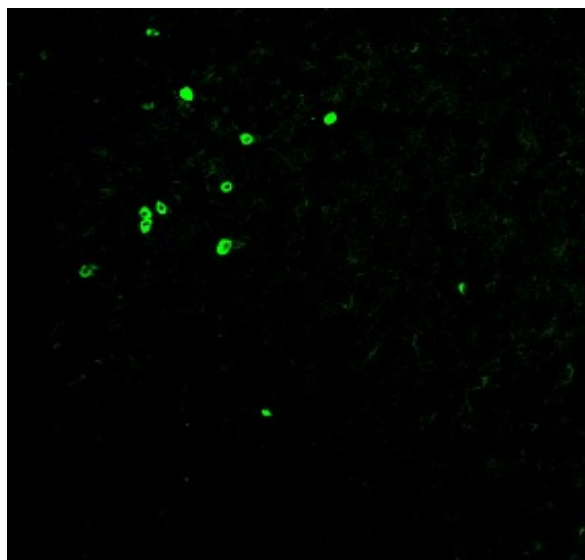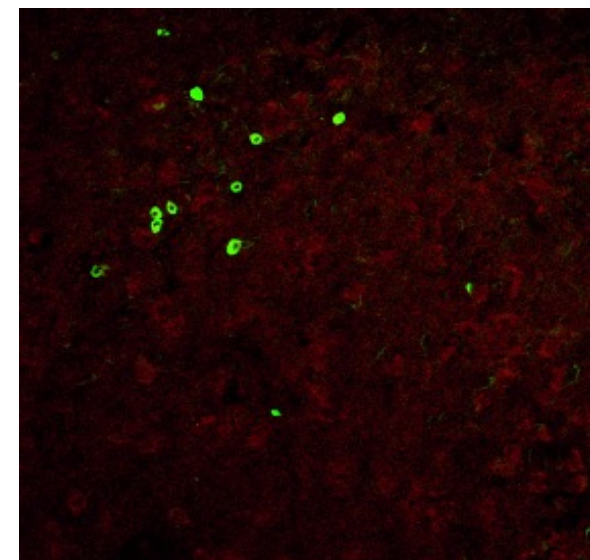

Supplement: fig7-figsupp1-data1 [file elife-78972-fig7-figsupp1-data1-v3.zip]

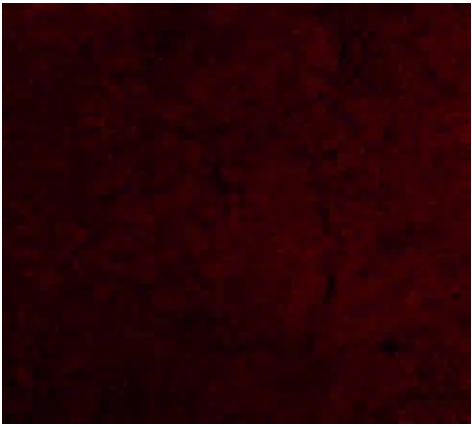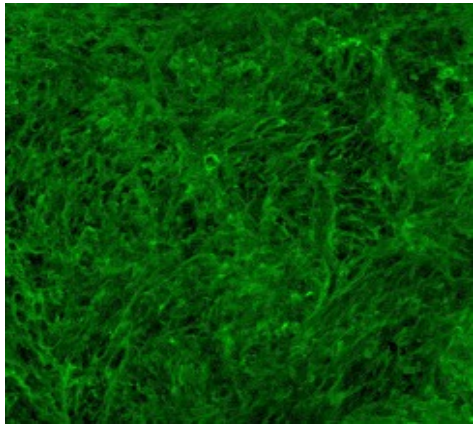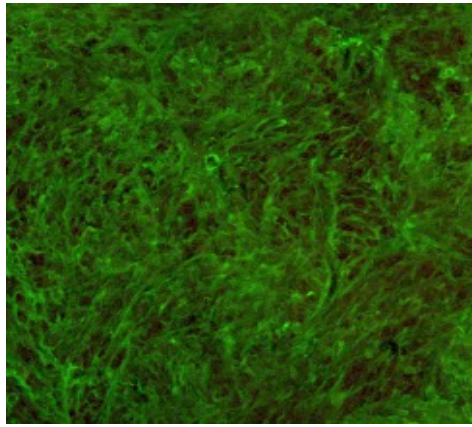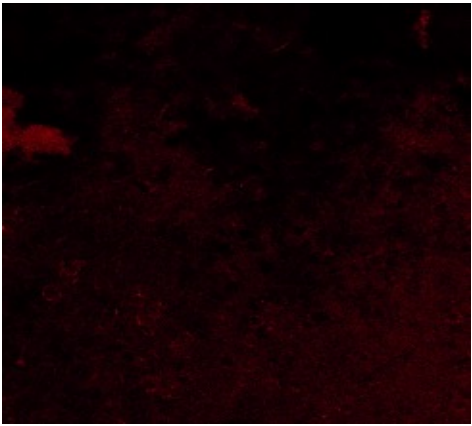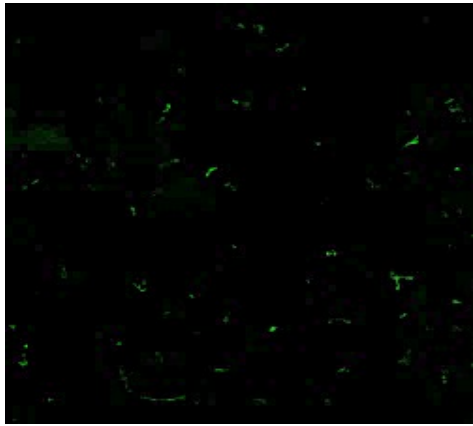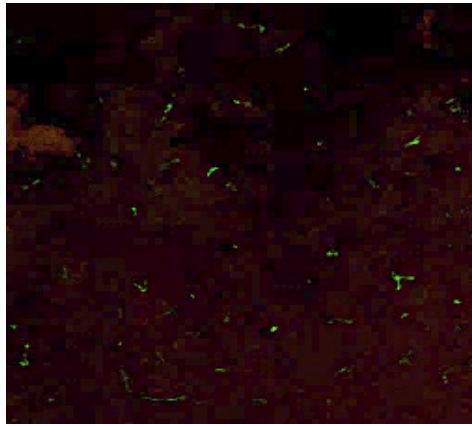

Supplement: fig7-figsupp2-data1 [file elife-78972-fig7-figsupp2-data1-v3.zip]

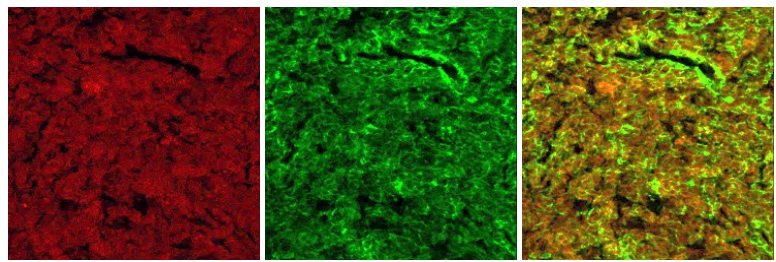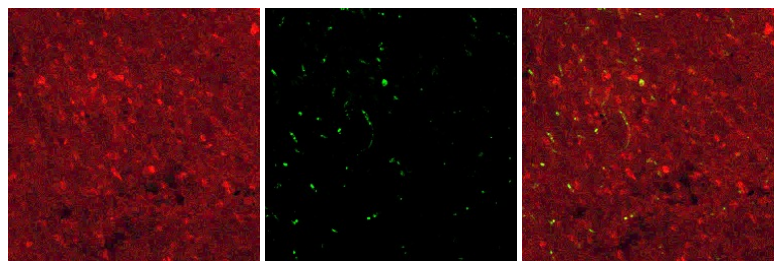

Supplement: fig7-figsupp2-data1 [file elife-78972-fig7-figsupp2-data1-v3.zip]

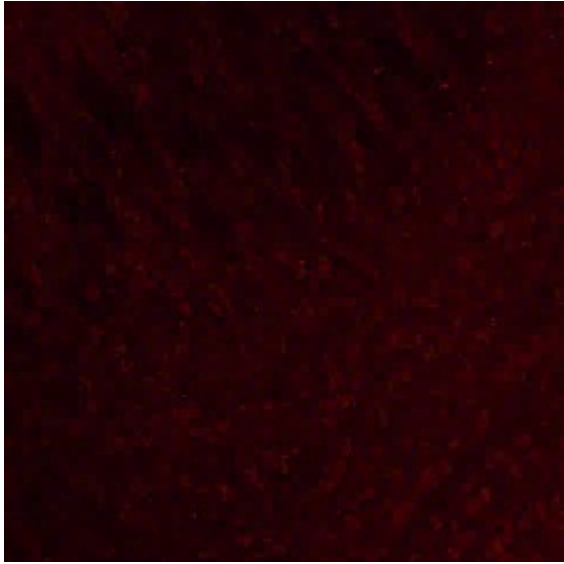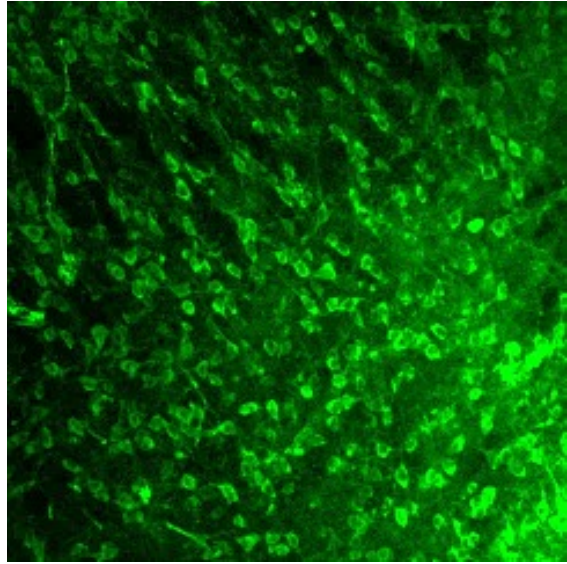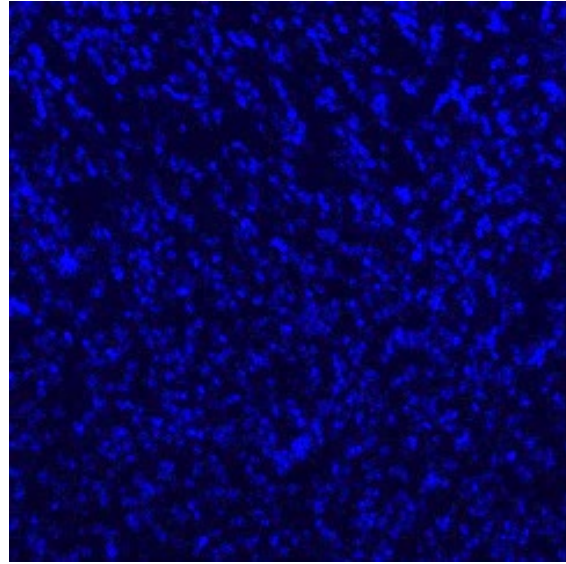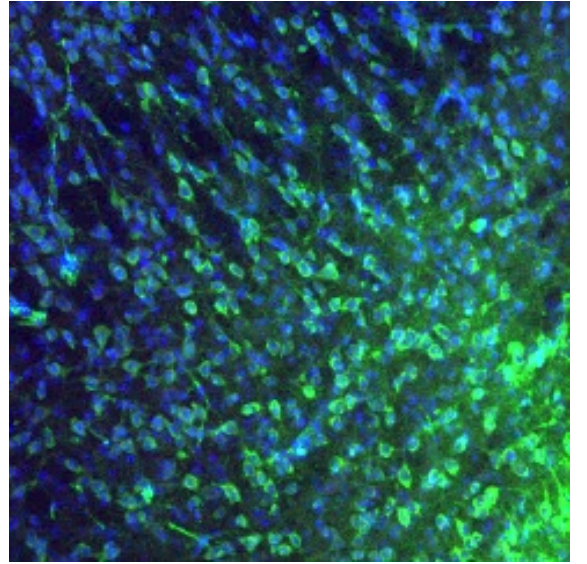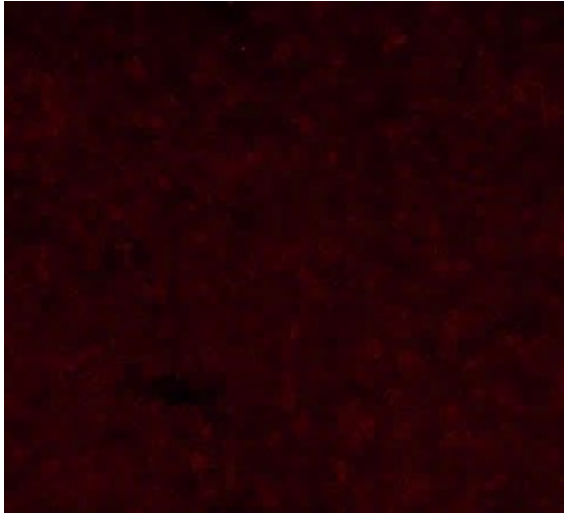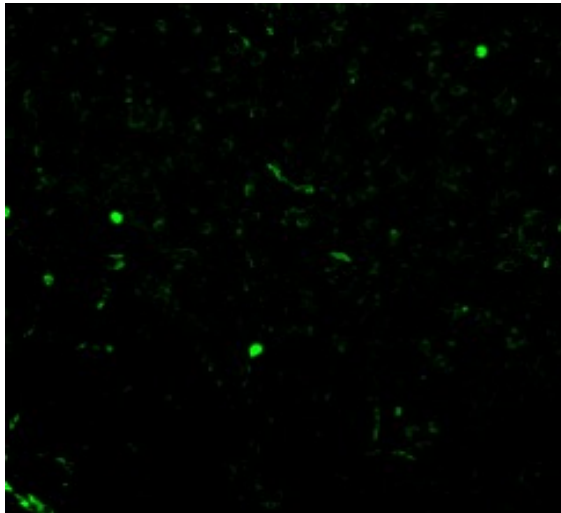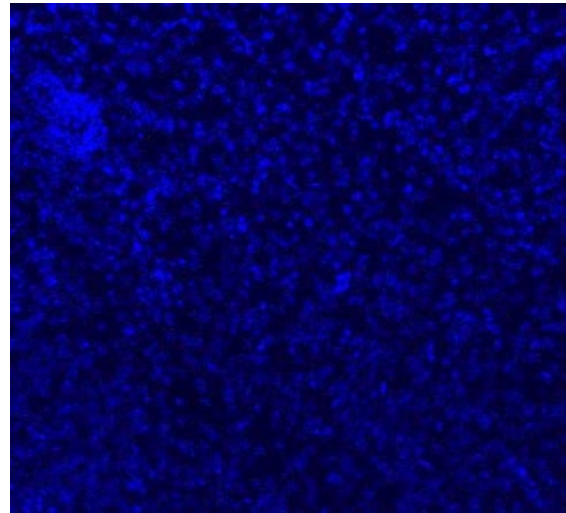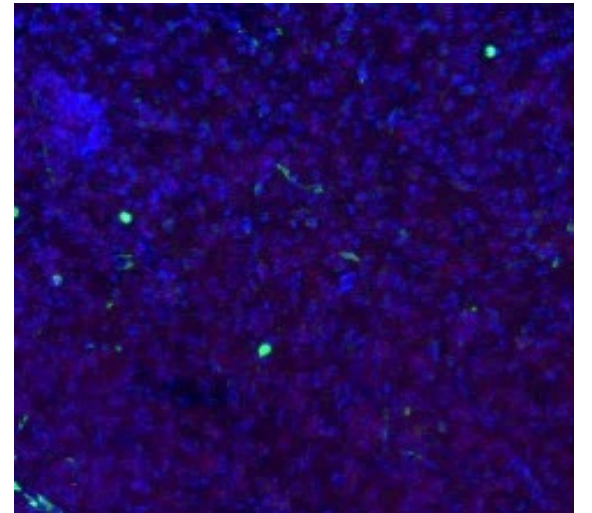

Supplement: fig7-figsupp3-data1 [file elife-78972-fig7-figsupp3-data1-v3.zip]

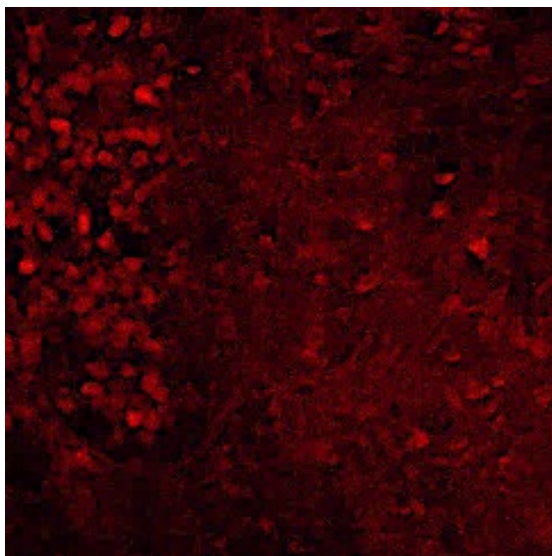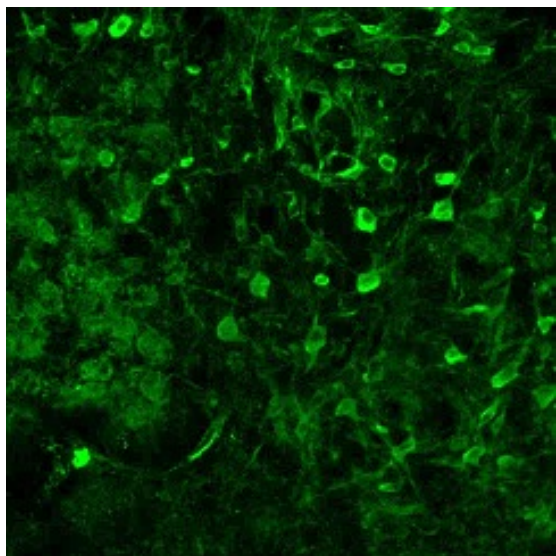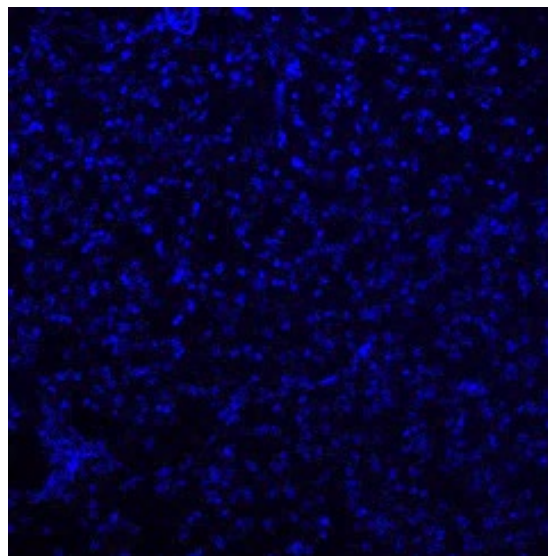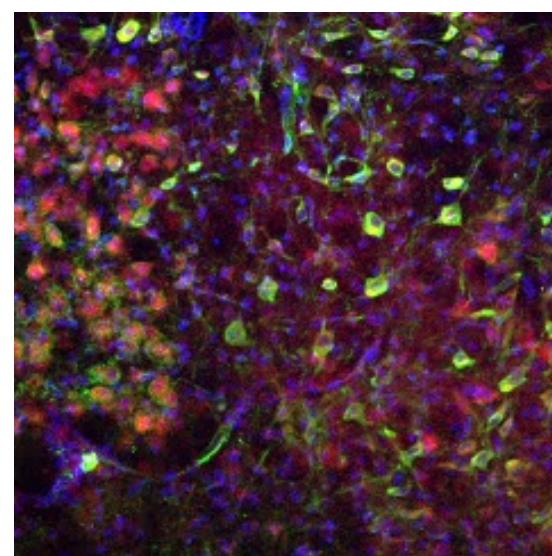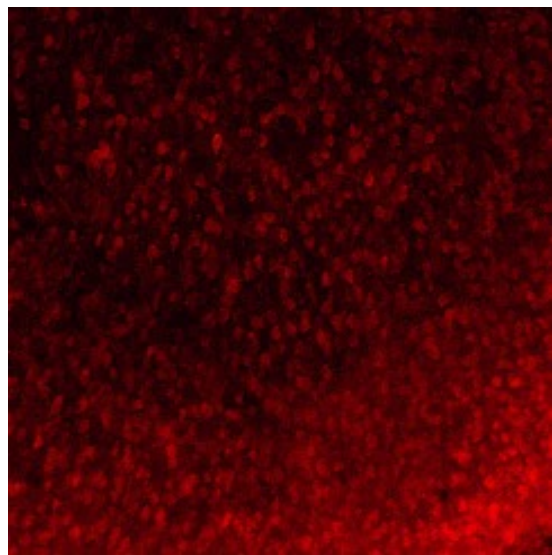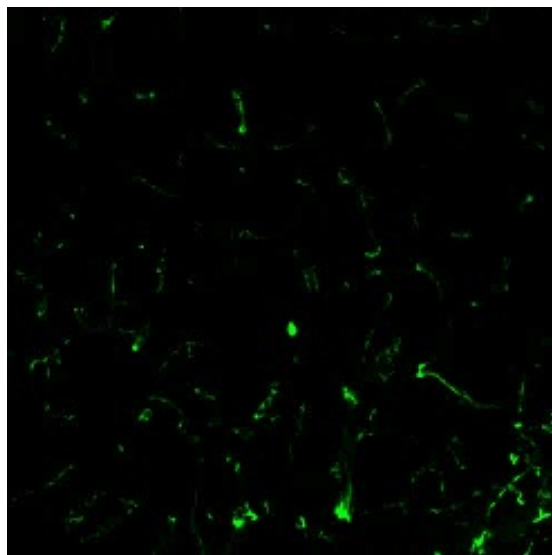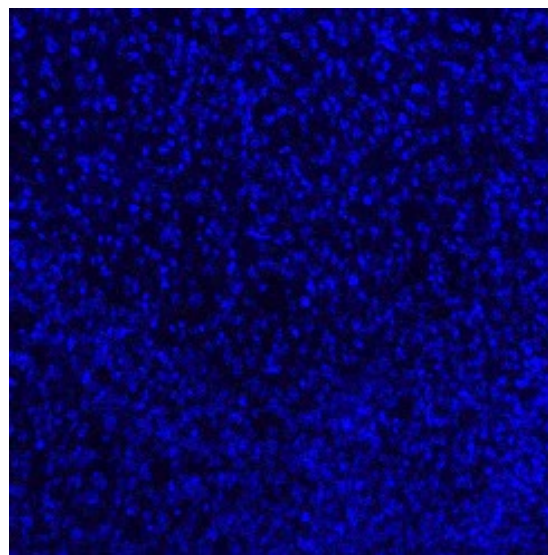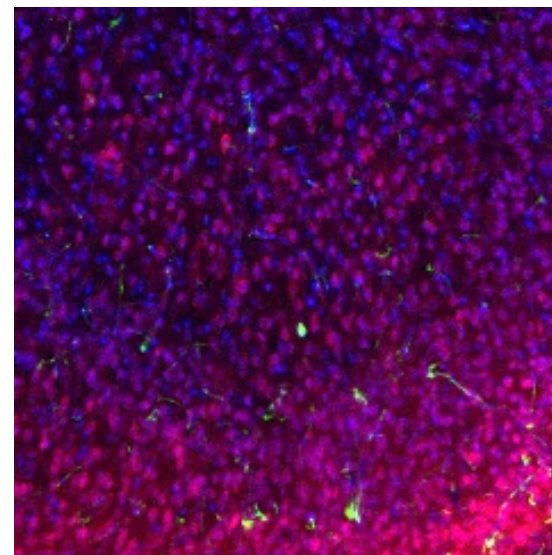

Supplement: fig7-figsupp3-data1 [file elife-78972-fig7-figsupp3-data1-v3.zip]

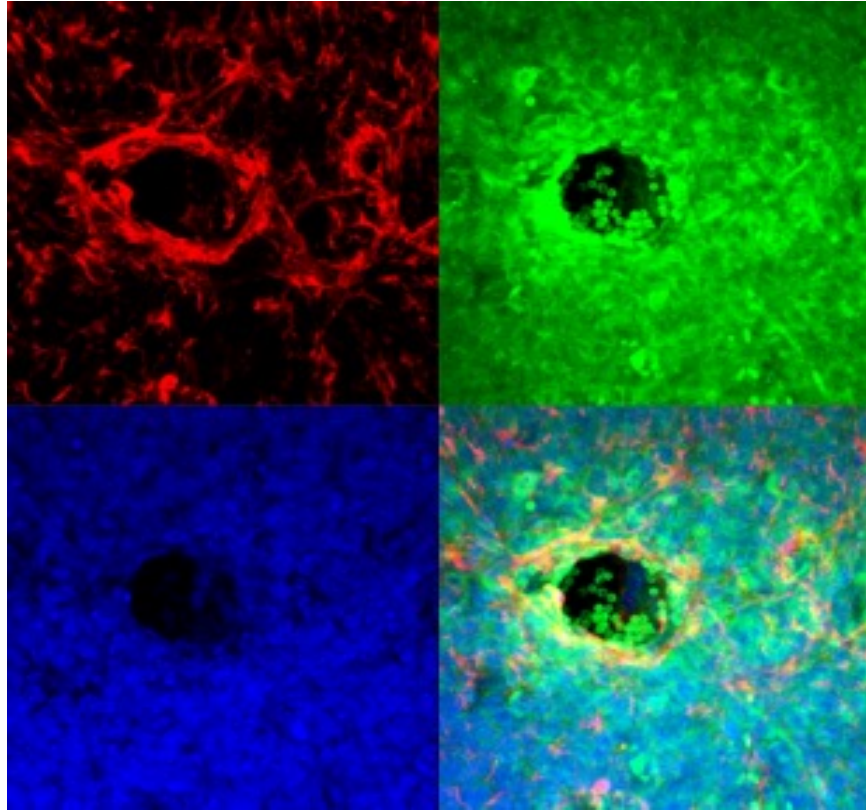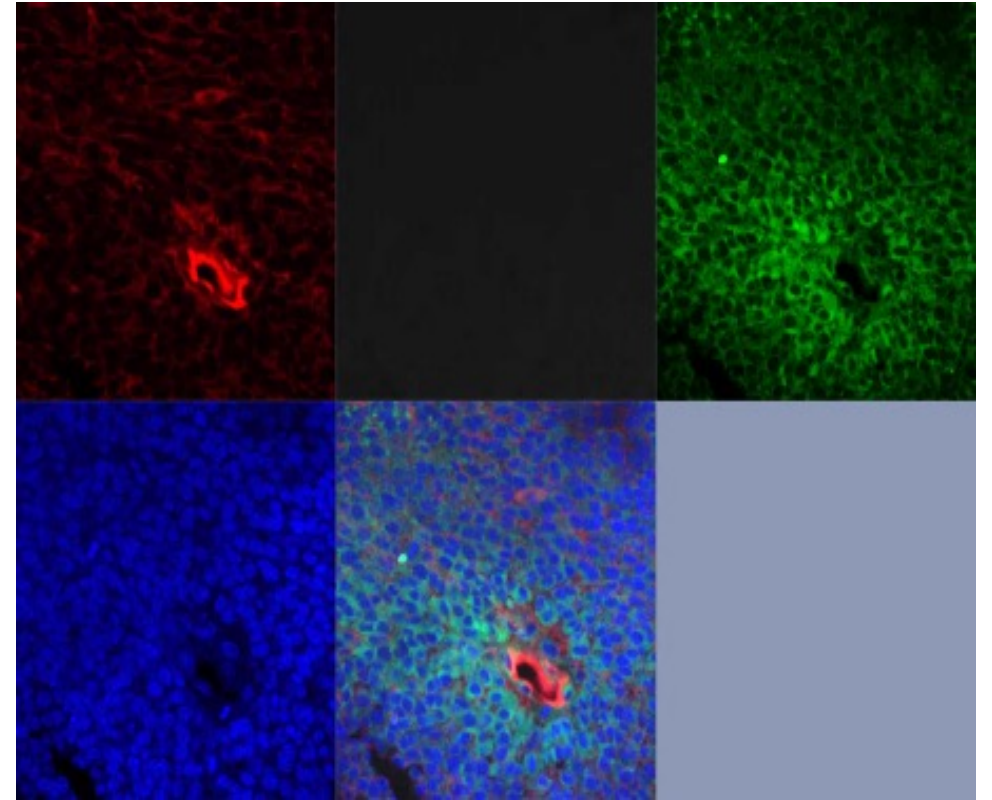

Supplement: fig7-figsupp4-data1 [file elife-78972-fig7-figsupp4-data1-v3.zip]

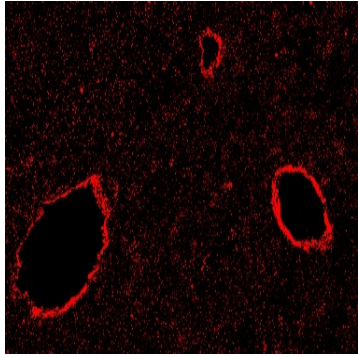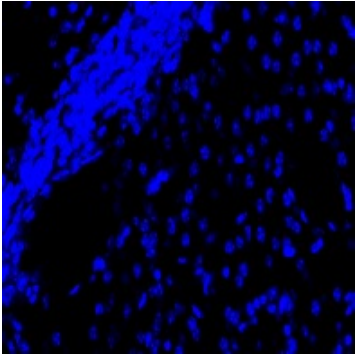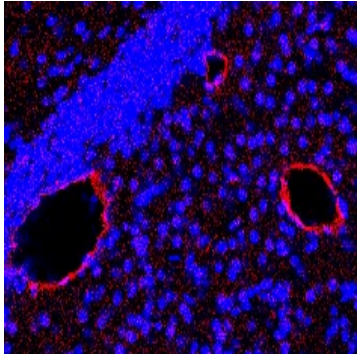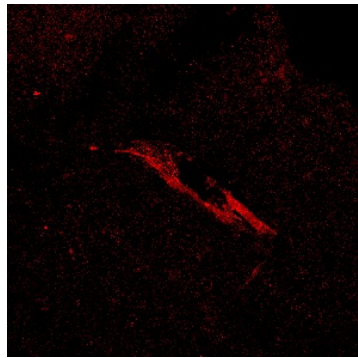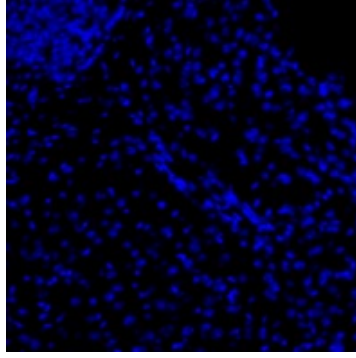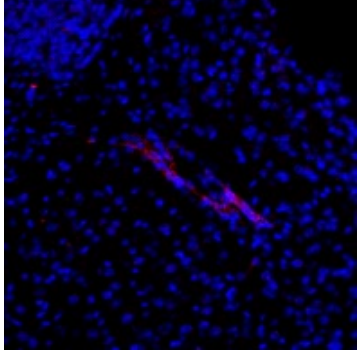

Supplement: fig7-figsupp4-data1 [file elife-78972-fig7-figsupp4-data1-v3.zip]

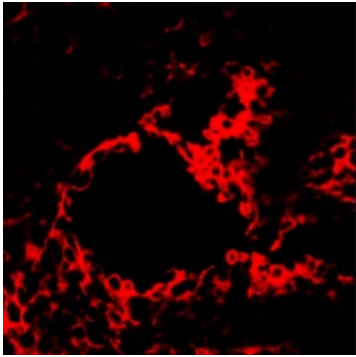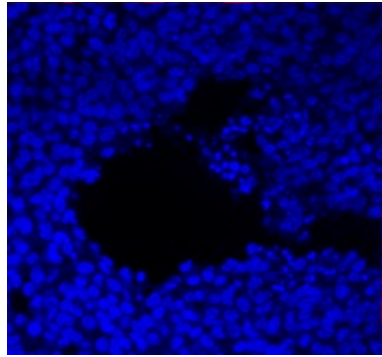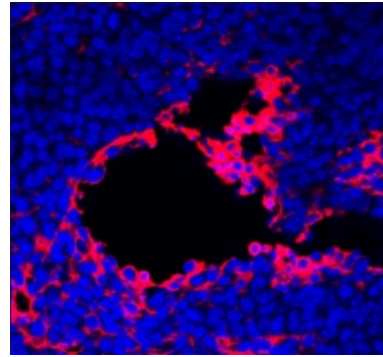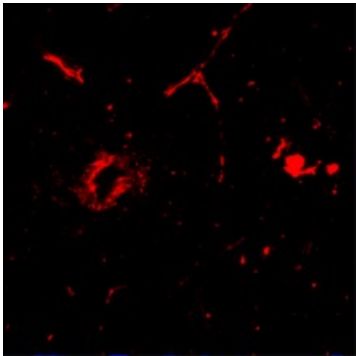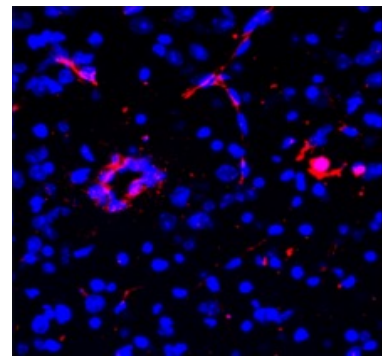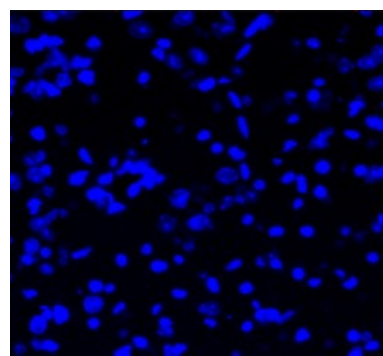

Supplement: fig7-figsupp4-data1 [file elife-78972-fig7-figsupp4-data1-v3.zip]

FMOD

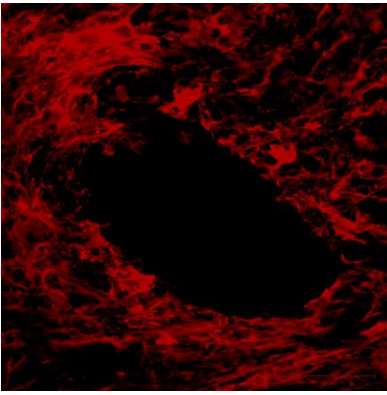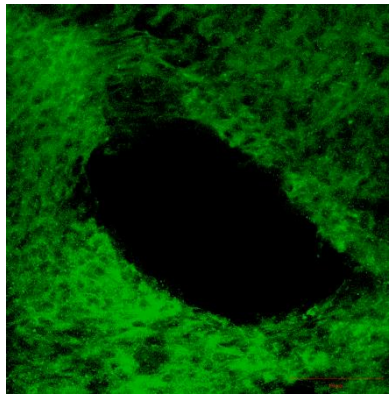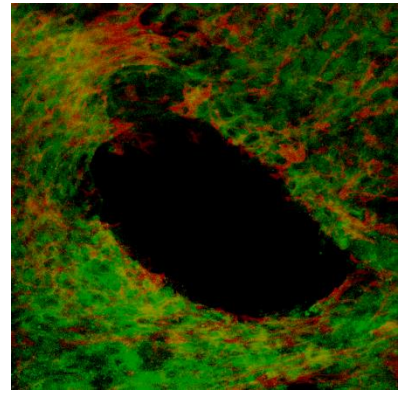

pFAK

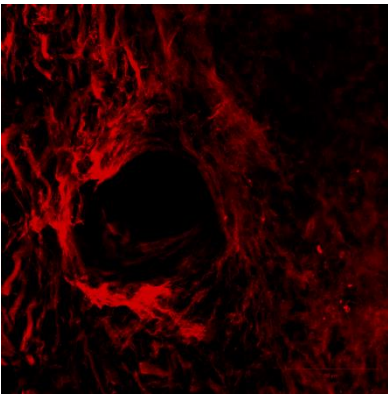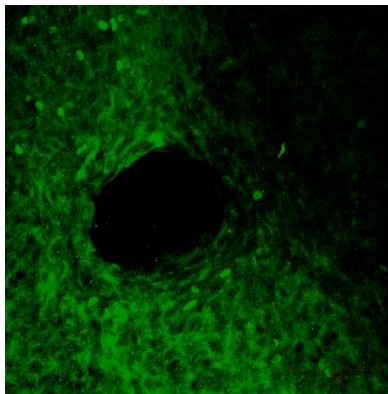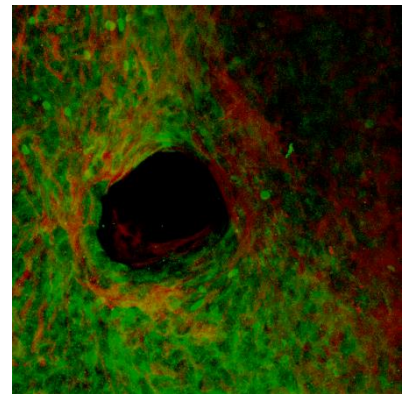

JAG1

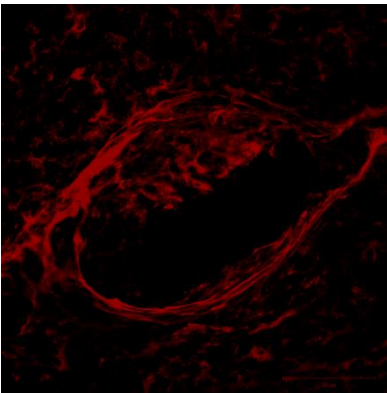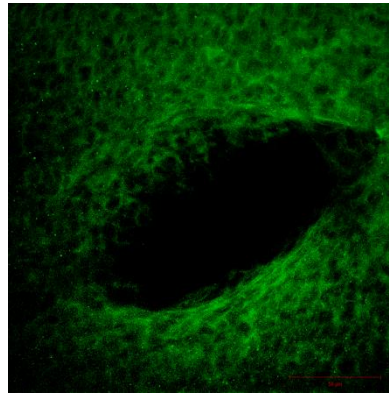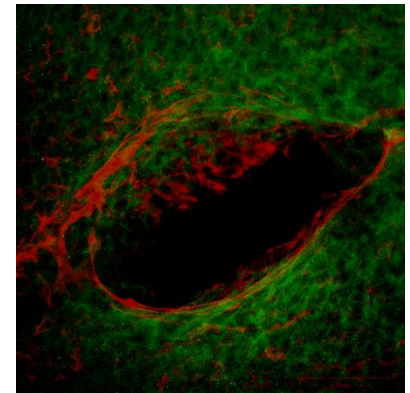

HES1

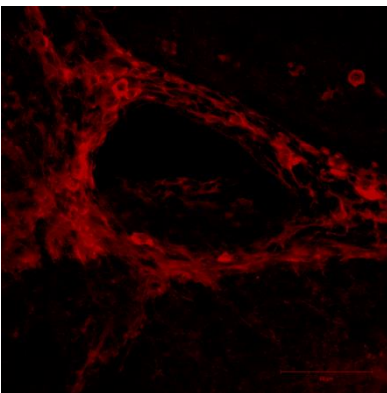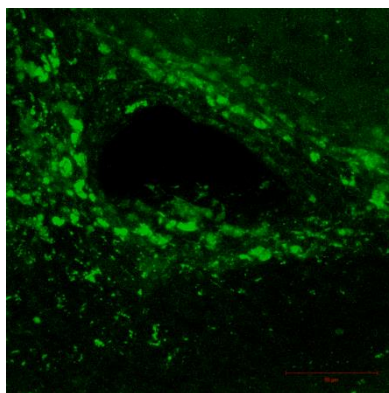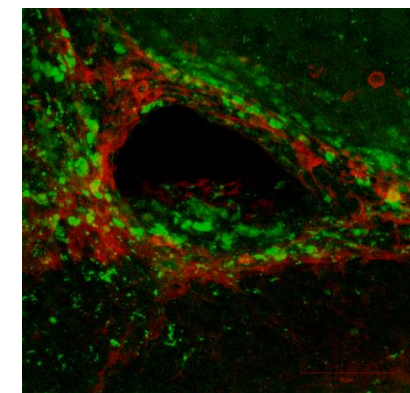

Supplement: fig7-figsupp5-data1 [file elife-78972-fig7-figsupp5-data1-v3.zip]

FMOD

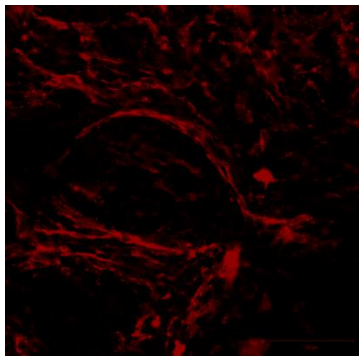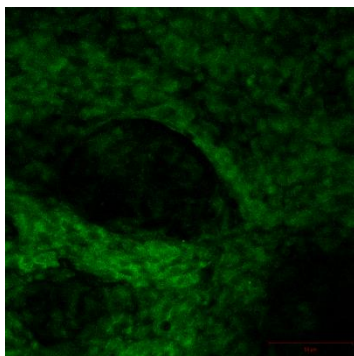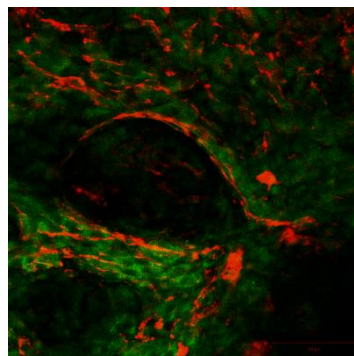

pFAK

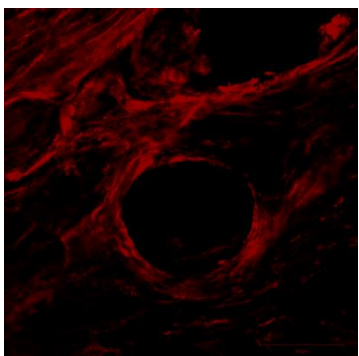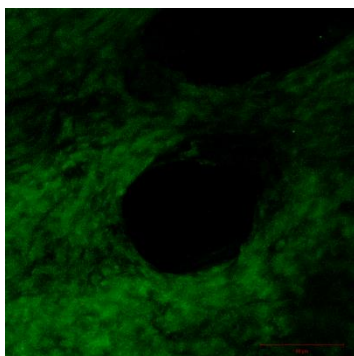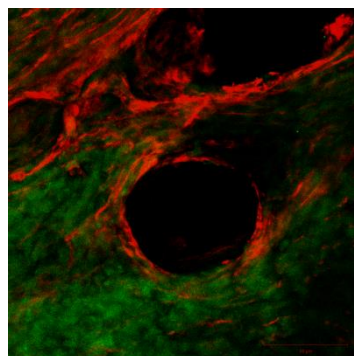

JAG1

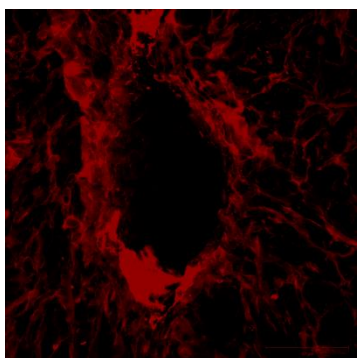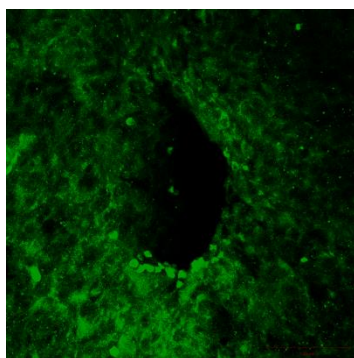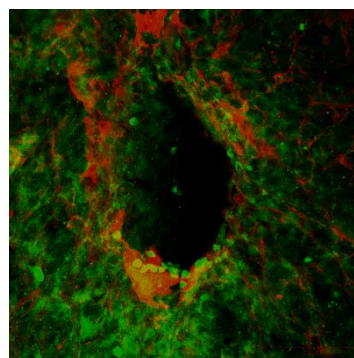

HES1

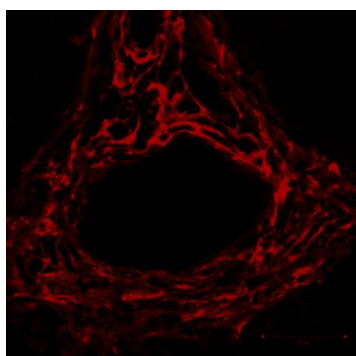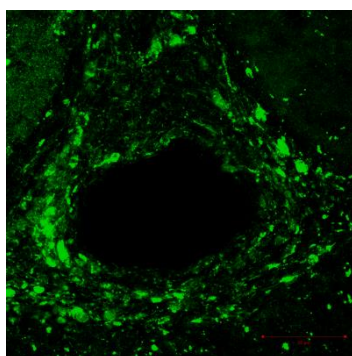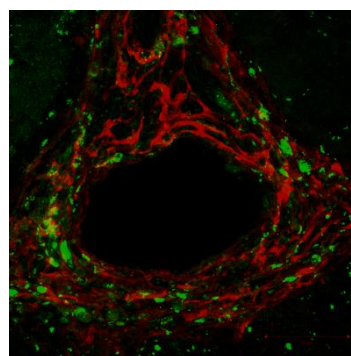

Supplement: fig7-figsupp5-data1 [file elife-78972-fig7-figsupp5-data1-v3.zip]
